# Supplementary material
Source: MDPI journal article supplement (https://www.mdpi.com/2304-6740/9/10/74)

---

The following ALERTS were generated. Each ALERT has the format  
**test-name\_ALERT\_alert-type\_alert-level.**  
Click on the hyperlinks for more details of the test.

---

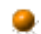

#### **Alert level B**

THETM01\_ALERT\_3\_B The value of  $\sin(\theta_{\max})/\lambda$  is less than 0.575  
Calculated  $\sin(\theta_{\max})/\lambda = 0.5691$

**Author Response: The value of  $\sin(\theta_{\max})/\lambda$  is 0.5824, because crystals were poorly diffracting at high angles. Other attempts of crystallization were done, but no single crystals of better quality were obtained**

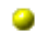

#### **Alert level C**

PLAT220\_ALERT\_2\_C NonSolvent Resd 1 C Ueq(max)/Ueq(min) Range 4.3 Ratio

**Author Response: Due to the quality of the crystal there was little dynamic disordered O crystallization was done, but no single crystals of better quality were obtained**

PLAT241\_ALERT\_2\_C High 'MainMol' Ueq as Compared to Neighbors of C41 Check

**Author Response: Due to the quality of the crystal there was little dynamic disordered O crystallization was done, but no single crystals of better quality were obtained**

PLAT906\_ALERT\_3\_C Large K Value in the Analysis of Variance ..... 2.383 Check

**Author Response: Due to the quality of the crystal we have not taken in account some re angles which intensity values were negative. Other attempts of crystallization were done, but no single crystals of better qu**

PLAT911\_ALERT\_3\_C Missing FCF Refl Between Thmin & STh/L= 0.569 12 Report

**Author Response: These reflections were probably affected by unexpected deviations in their intensities for symmetry equivalent measurements and omitted during initial data reduction. Other attempts of crystallization were done, but no single crystals of better qu**

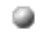

#### **Alert level G**

PLAT002\_ALERT\_2\_G Number of Distance or Angle Restraints on AtSite 7 Note  
PLAT083\_ALERT\_2\_G SHELXL Second Parameter in WGHT Unusually Large 17.78 Why ?

|                   |                                                  |      |             |
|-------------------|--------------------------------------------------|------|-------------|
| PLAT171_ALERT_4_G | The CIF-Embedded .res File Contains EADP Records | 2    | Report      |
| PLAT176_ALERT_4_G | The CIF-Embedded .res File Contains SADI Records | 3    | Report      |
| PLAT230_ALERT_2_G | Hirshfeld Test Diff for F4A --C23 .              | 7.0  | s.u.        |
| PLAT230_ALERT_2_G | Hirshfeld Test Diff for F4B --C23 .              | 6.5  | s.u.        |
| PLAT230_ALERT_2_G | Hirshfeld Test Diff for F5B --C23 .              | 13.0 | s.u.        |
| PLAT242_ALERT_2_G | Low 'MainMol' Ueq as Compared to Neighbors of    | C13  | Check       |
| PLAT242_ALERT_2_G | Low 'MainMol' Ueq as Compared to Neighbors of    | C23  | Check       |
| PLAT242_ALERT_2_G | Low 'MainMol' Ueq as Compared to Neighbors of    | C33  | Check       |
| PLAT301_ALERT_3_G | Main Residue Disorder .....(Resd 1 )             | 5%   | Note        |
| PLAT794_ALERT_5_G | Tentative Bond Valency for Tb1 (III) .           | 3.39 | Info        |
| PLAT802_ALERT_4_G | CIF Input Record(s) with more than 80 Characters | 8    | Info        |
| PLAT860_ALERT_3_G | Number of Least-Squares Restraints .....         | 21   | Note        |
| PLAT883_ALERT_1_G | No Info/Value for _atom_sites_solution_primary . |      | Please Do ! |
| PLAT909_ALERT_3_G | Percentage of I>2sig(I) Data at Theta(Max) Still | 85%  | Note        |
| PLAT910_ALERT_3_G | Missing # of FCF Reflection(s) Below Theta(Min). | 3    | Note        |
| PLAT933_ALERT_2_G | Number of OMIT Records in Embedded .res File ... | 3    | Note        |
| PLAT978_ALERT_2_G | Number C-C Bonds with Positive Residual Density. | 0    | Info        |

---

0 **ALERT level A** = Most likely a serious problem - resolve or explain  
 1 **ALERT level B** = A potentially serious problem, consider carefully  
 4 **ALERT level C** = Check. Ensure it is not caused by an omission or oversight  
 19 **ALERT level G** = General information/check it is not something unexpected

1 ALERT type 1 CIF construction/syntax error, inconsistent or missing data  
 12 ALERT type 2 Indicator that the structure model may be wrong or deficient  
 7 ALERT type 3 Indicator that the structure quality may be low  
 3 ALERT type 4 Improvement, methodology, query or suggestion  
 1 ALERT type 5 Informative message, check

---

It is advisable to attempt to resolve as many as possible of the alerts in all categories. Often the minor alerts point to easily fixed oversights, errors and omissions in your CIF or refinement strategy, so attention to these fine details can be worthwhile. In order to resolve some of the more serious problems it may be necessary to carry out additional measurements or structure refinements. However, the purpose of your study may justify the reported deviations and the more serious of these should normally be commented upon in the discussion or experimental section of a paper or in the "special\_details" fields of the CIF. checkCIF was carefully designed to identify outliers and unusual parameters, but every test has its limitations and alerts that are not important in a particular case may appear. Conversely, the absence of alerts does not guarantee there are no aspects of the results needing attention. It is up to the individual to critically assess their own results and, if necessary, seek expert advice.

### **Publication of your CIF in IUCr journals**

A basic structural check has been run on your CIF. These basic checks will be run on all CIFs submitted for publication in IUCr journals (*Acta Crystallographica*, *Journal of Applied Crystallography*, *Journal of Synchrotron Radiation*); however, if you intend to submit to *Acta Crystallographica Section C* or *E* or *IUCrData*, you should make sure that full publication checks are run on the final version of your CIF prior to submission.

### **Publication of your CIF in other journals**

Please refer to the *Notes for Authors* of the relevant journal for any special instructions relating to CIF submission.

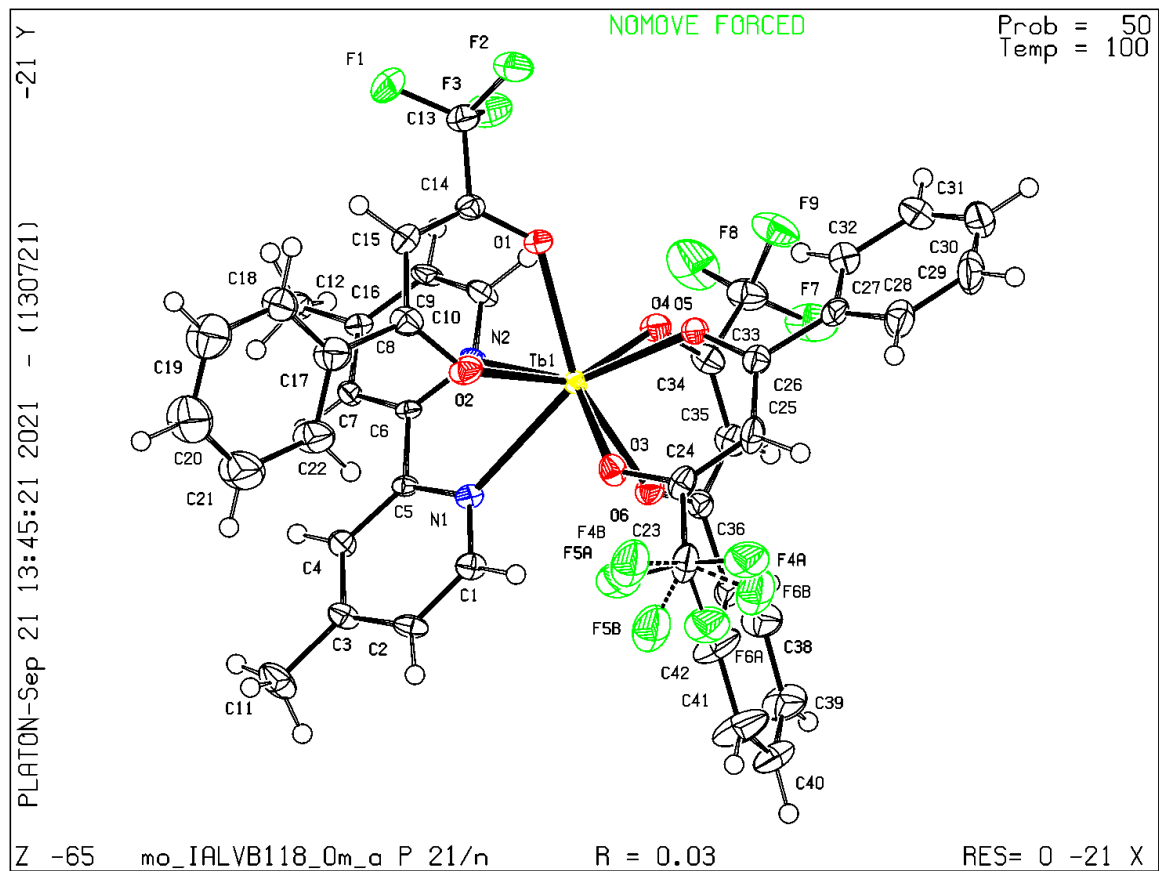

Supplement: s1 [file s1 › Check.cif (9_mo_IALVB88_0m_aa.pdf]
