# Supplementary material
Source: MDPI journal article supplement (https://www.mdpi.com/2304-6740/9/10/74)
Supplement: s1 [file s1]

Archive with 7 entries (7 files):
- Check.cif (10)_mo_IALVB88_0m_aa.cif
- Check.cif (10)_mo_IALVB88_0m_aa.pdf
- Check.cif (9)_mo_IALVB88_0m_aa.cif
- Check.cif (9_mo_IALVB88_0m_aa.pdf
- Crystal Structure Report for Complex 10.pdf
- inorganics-1337508-supplementary - for proofreading.pdf
- mo_IALVB88_0m(10)_aa.pdf
