# Supplementary material
Source: MDPI journal article supplement (https://www.mdpi.com/2304-6740/9/10/74)
Supplement: s1 [file s1]

## checkCIF/PLATON report

Structure factors have been supplied for datablock(s) mo\_IALVB88\_0m\_aa

THIS REPORT IS FOR GUIDANCE ONLY. IF USED AS PART OF A REVIEW PROCEDURE FOR PUBLICATION, IT SHOULD NOT REPLACE THE EXPERTISE OF AN EXPERIENCED CRYSTALLOGRAPHIC REFEREE.

No syntax errors found.      CIF dictionary      Interpreting this report

### Datablock: mo\_IALVB88\_0m\_aa

---

|                        |                            |                                  |
|------------------------|----------------------------|----------------------------------|
| Bond precision:        | C-C = 0.0086 Å             | Wavelength=0.71073               |
| Cell:                  | a=11.1009(6)               | b=21.8025(12)      c=18.7796(11) |
|                        | alpha=90                   | beta=106.930(3)      gamma=90    |
| Temperature:           | 100 K                      |                                  |
|                        | Calculated                 | Reported                         |
| Volume                 | 4348.2(4)                  | 4348.2(4)                        |
| Space group            | P 21/n                     | P 21/n                           |
| Hall group             | -P 2yn                     | -P 2yn                           |
| Moiety formula         | C40 H24 Eu F12 O8, C5 H6 N | C40 H24 Eu F12 O8, C5 H6 N       |
| Sum formula            | C45 H30 Eu F12 N O8        | C45 H30 Eu F12 N O8              |
| Mr                     | 1092.67                    | 1092.66                          |
| Dx, g cm <sup>-3</sup> | 1.669                      | 1.669                            |
| Z                      | 4                          | 4                                |
| Mu (mm <sup>-1</sup> ) | 1.549                      | 1.549                            |
| F000                   | 2168.0                     | 2168.0                           |
| F000'                  | 2168.87                    |                                  |
| h, k, lmax             | 13, 25, 22                 | 12, 25, 22                       |
| Nref                   | 7641                       | 6112                             |
| Tmin, Tmax             | 0.863, 0.943               | 0.473, 0.746                     |
| Tmin'                  | 0.633                      |                                  |

Correction method= # Reported T Limits: Tmin=0.473 Tmax=0.746  
AbsCorr = MULTI-SCAN

Data completeness= 0.800      Theta(max)= 24.999

|                               |                   |
|-------------------------------|-------------------|
| R(reflections)= 0.0324( 3719) | wR2(reflections)= |
| S = 0.832                     | 0.0505( 6112)     |
| Npar= 568                     |                   |

---

The following ALERTS were generated. Each ALERT has the format  
**test-name\_ALERT\_alert-type\_alert-level.**  
Click on the hyperlinks for more details of the test.

---

 **Alert level A**

PLAT029\_ALERT\_3\_A \_diffn\_measured\_fraction\_theta\_full value Low . 0.800 Why?

**Author Response: The crystals were found to be weakly diffracting and as a result, reflections did not extend out as far in theta as what would normally be considered desirable for small molecules.**

---

 **Alert level B**

PLAT911\_ALERT\_3\_B Missing FCF Refl Between Thmin & STh/L= 0.595 1496 Report

**Author Response: Due to the quality of the some reflections below theta min were affected by the beamstop, they haven't been taken into account but this doesn't affect the refinement**

---

 **Alert level C**

RINTA01\_ALERT\_3\_C The value of Rint is greater than 0.12  
Rint given 0.137

**Author Response: The elevated values of \_diffn\_reflms\_av\_R\_equivalents is due to the poor crystal diffraction because the crystal was very thin. Other attempts of crystallization were done, but no single crystals of better quality were obtained.**

PLAT220\_ALERT\_2\_C NonSolvent Resd 1 C Ueq(max)/Ueq(min) Range 3.9 Ratio

**Author Response: Due to the quality of the crystal there was little dynamic disorder**

PLAT250\_ALERT\_2\_C Large U3/U1 Ratio for Average U(i,j) Tensor .... 2.3 Note

**Author Response: Due to the quality of the crystal there was little dynamic disorder**

PLAT342\_ALERT\_3\_C Low Bond Precision on C-C Bonds ..... 0.00857 Ang.

**Author Response: The isolated crystals were very thin and diffracted weakly at high angles, for this reason the C-C Bonds are low precision**

PLAT910\_ALERT\_3\_C Missing # of FCF Reflection(s) Below Theta(Min).

6 Note

**Author Response: Due to the poor crystal diffraction because the crystal was very thin.**

PLAT976\_ALERT\_2\_C Check Calcd Resid. Dens. 0.60A From N1

-0.40 eA-3

**Author Response: Due to the quality of the crystal**



#### Alert level G

|                   |                                                  |       |             |
|-------------------|--------------------------------------------------|-------|-------------|
| PLAT002_ALERT_2_G | Number of Distance or Angle Restraints on AtSite | 2     | Note        |
| PLAT007_ALERT_5_G | Number of Unrefined Donor-H Atoms .....          | 1     | Report      |
| PLAT020_ALERT_3_G | The Value of Rint is Greater Than 0.12 .....     | 0.137 | Report      |
| PLAT171_ALERT_4_G | The CIF-Embedded .res File Contains EADP Records | 2     | Report      |
| PLAT172_ALERT_4_G | The CIF-Embedded .res File Contains DFIX Records | 1     | Report      |
| PLAT242_ALERT_2_G | Low 'MainMol' Ueq as Compared to Neighbors of    | C11   | Check       |
| PLAT242_ALERT_2_G | Low 'MainMol' Ueq as Compared to Neighbors of    | C21   | Check       |
| PLAT242_ALERT_2_G | Low 'MainMol' Ueq as Compared to Neighbors of    | C31   | Check       |
| PLAT794_ALERT_5_G | Tentative Bond Valency for Eu1 (III) .           | 3.48  | Info        |
| PLAT860_ALERT_3_G | Number of Least-Squares Restraints .....         | 1     | Note        |
| PLAT883_ALERT_1_G | No Info/Value for _atom_sites_solution_primary . |       | Please Do ! |
| PLAT909_ALERT_3_G | Percentage of I>2sig(I) Data at Theta(Max) Still | 38%   | Note        |
| PLAT933_ALERT_2_G | Number of OMIT Records in Embedded .res File ... | 1     | Note        |
| PLAT941_ALERT_3_G | Average HKL Measurement Multiplicity .....       | 1.0   | Low         |
| PLAT978_ALERT_2_G | Number C-C Bonds with Positive Residual Density. | 1     | Info        |

- 
- 1 **ALERT level A** = Most likely a serious problem - resolve or explain  
1 **ALERT level B** = A potentially serious problem, consider carefully  
6 **ALERT level C** = Check. Ensure it is not caused by an omission or oversight  
15 **ALERT level G** = General information/check it is not something unexpected

- 1 ALERT type 1 CIF construction/syntax error, inconsistent or missing data  
9 ALERT type 2 Indicator that the structure model may be wrong or deficient  
9 ALERT type 3 Indicator that the structure quality may be low  
2 ALERT type 4 Improvement, methodology, query or suggestion  
2 ALERT type 5 Informative message, check
- 
-

It is advisable to attempt to resolve as many as possible of the alerts in all categories. Often the minor alerts point to easily fixed oversights, errors and omissions in your CIF or refinement strategy, so attention to these fine details can be worthwhile. In order to resolve some of the more serious problems it may be necessary to carry out additional measurements or structure refinements. However, the purpose of your study may justify the reported deviations and the more serious of these should normally be commented upon in the discussion or experimental section of a paper or in the "special\_details" fields of the CIF. checkCIF was carefully designed to identify outliers and unusual parameters, but every test has its limitations and alerts that are not important in a particular case may appear. Conversely, the absence of alerts does not guarantee there are no aspects of the results needing attention. It is up to the individual to critically assess their own results and, if necessary, seek expert advice.

### **Publication of your CIF in IUCr journals**

A basic structural check has been run on your CIF. These basic checks will be run on all CIFs submitted for publication in IUCr journals (*Acta Crystallographica*, *Journal of Applied Crystallography*, *Journal of Synchrotron Radiation*); however, if you intend to submit to *Acta Crystallographica Section C* or *E* or *IUCrData*, you should make sure that full publication checks are run on the final version of your CIF prior to submission.

### **Publication of your CIF in other journals**

Please refer to the *Notes for Authors* of the relevant journal for any special instructions relating to CIF submission.
