# Supplementary material
Source: MDPI journal article supplement (https://www.mdpi.com/2304-6740/9/10/74)
Supplement: s1 [file s1 › Check.cif (9)_mo_IALVB88_0m_aa.cif]

 
data_mo_IALVB118_0m_a
# start Validation Reply Form
_vrf_THETM01_mo_IALVB118_0m_a
;
PROBLEM: _diffrn_measured_fraction_theta_full/_max < 1.0
RESPONSE: 
    The value of sine(theta_max)/wavelength is 0.5824, because
crystals were poorly diffracting at high angles. Other attempts of 
crystallization were done, but no single crystals of better quality were obtained.

;
# end Validation Reply Form  
# start Validation Reply Form
_vrf_PLAT241_mo_IALVB118_0m_a
;
PROBLEM: NonSolvent   Resd 1  C   Ueq(max)/Ueq(min) Range
RESPONSE: Due to the quality of the crystal there was litle dinamic disordered Other attempts of 
crystallization were done, but no single crystals of better quality were obtained.

;
# end Validation Reply Form 
# start Validation Reply Form
_vrf_PLAT220_mo_IALVB118_0m_a
;
PROBLEM: High   'MainMol' Ueq as Compared to Neighbors of        C41
RESPONSE: Due to the quality of the crystal there was litle dinamic disordered Other attempts of 
crystallization were done, but no single crystals of better quality were obtained.

;
# end Validation Reply Form  
# start Validation Reply Form
_vrf_PLAT906_mo_IALVB118_0m_a
;
PROBLEM: Large K Value in the Analysis of Variance
RESPONSE: Due to the quality of the crystal we have not taken in account some reflexions at high 
angles which intensity values were negative.
Other attempts of crystallization were done, but no single crystals of better quality were obtained.

;
# end Validation Reply Form 
# start Validation Reply Form
_vrf_PLAT911_mo_IALVB118_0m_a
;
PROBLEM: Missing FCF Refl Between Thmin & STh/L=    0.569
RESPONSE: These reflections were probably affected by unexpected deviations
in their intensities for symmetry equivalent measurements and omitted during
initial data reduction.
Other attempts of crystallization were done, but no single crystals of better quality were obtained.

;
# end Validation Reply Form 
_audit_creation_method            'SHELXL-2018/3'
_shelx_SHELXL_version_number      '2018/3'
_chemical_name_systematic         ?
_chemical_name_common             ?
_chemical_melting_point           ?
_chemical_formula_moiety          'C42 H30 F9 N2 O6 Tb'
_chemical_formula_sum
 'C42 H30 F9 N2 O6 Tb' 
_chemical_formula_weight          988.60

loop_
 _atom_type_symbol
 _atom_type_description
 _atom_type_scat_dispersion_real
 _atom_type_scat_dispersion_imag
 _atom_type_scat_source
 'C'  'C'   0.0033   0.0016
 'International Tables Vol C Tables 4.2.6.8 and 6.1.1.4'
 'H'  'H'   0.0000   0.0000
 'International Tables Vol C Tables 4.2.6.8 and 6.1.1.4'
 'F'  'F'   0.0171   0.0103
 'International Tables Vol C Tables 4.2.6.8 and 6.1.1.4'
 'N'  'N'   0.0061   0.0033
 'International Tables Vol C Tables 4.2.6.8 and 6.1.1.4'
 'O'  'O'   0.0106   0.0060
 'International Tables Vol C Tables 4.2.6.8 and 6.1.1.4'
 'Tb'  'Tb'  -0.1723   4.1537
 'International Tables Vol C Tables 4.2.6.8 and 6.1.1.4'
 
_space_group_crystal_system       monoclinic
_space_group_IT_number            14
_space_group_name_H-M_alt         'P 21/n'
_space_group_name_Hall            '-P 2yn'
 
_shelx_space_group_comment
;
The symmetry employed for this shelxl refinement is uniquely defined
by the following loop, which should always be used as a source of
symmetry information in preference to the above space-group names.
They are only intended as comments.
;
 
loop_
 _space_group_symop_operation_xyz
 'x, y, z'
 '-x+1/2, y+1/2, -z+1/2'
 '-x, -y, -z'
 'x-1/2, -y-1/2, z-1/2'
 
_cell_length_a                    11.1935(4)
_cell_length_b                    24.2208(7)
_cell_length_c                    15.5561(5)
_cell_angle_alpha                 90
_cell_angle_beta                  103.7180(10)
_cell_angle_gamma                 90
_cell_volume                      4097.2(2)
_cell_formula_units_Z             4
_cell_measurement_temperature     100(2)
_cell_measurement_reflns_used     9613
_cell_measurement_theta_min       2.52
_cell_measurement_theta_max       23.82
 
_exptl_crystal_description        plate
_exptl_crystal_colour             yellow
_exptl_crystal_density_meas       ?
_exptl_crystal_density_method     ?
_exptl_crystal_density_diffrn     1.603          
_exptl_crystal_F_000              1960
_exptl_transmission_factor_min    ?
_exptl_transmission_factor_max    ?
_exptl_crystal_size_max           0.190
_exptl_crystal_size_mid           0.170
_exptl_crystal_size_min           0.111
_exptl_absorpt_coefficient_mu     1.816
_shelx_estimated_absorpt_T_min    ?
_shelx_estimated_absorpt_T_max    ?
_exptl_absorpt_correction_type    multi-scan
_exptl_absorpt_correction_T_min   0.6499
_exptl_absorpt_correction_T_max   0.7450
_exptl_absorpt_process_details    sadabs
_exptl_absorpt_special_details    ?
_diffrn_ambient_temperature       100(2)
_diffrn_radiation_wavelength      0.71073
_diffrn_radiation_type            MoK\a
_diffrn_source                    microfocus
_diffrn_measurement_device_type   'D8 Venture'
_diffrn_measurement_method        '\f and \w scans'
_diffrn_detector_area_resol_mean  ?
_diffrn_reflns_number             79220
_diffrn_reflns_av_unetI/netI      0.0151
_diffrn_reflns_av_R_equivalents   0.0360
_diffrn_reflns_limit_h_min        -12
_diffrn_reflns_limit_h_max        12
_diffrn_reflns_limit_k_min        -27
_diffrn_reflns_limit_k_max        25
_diffrn_reflns_limit_l_min        -17
_diffrn_reflns_limit_l_max        17
_diffrn_reflns_theta_min          2.053
_diffrn_reflns_theta_max          23.857
_diffrn_reflns_theta_full         23.857
_diffrn_measured_fraction_theta_max   0.998
_diffrn_measured_fraction_theta_full  0.998
_diffrn_reflns_Laue_measured_fraction_max    0.998
_diffrn_reflns_Laue_measured_fraction_full   0.998
_diffrn_reflns_point_group_measured_fraction_max   0.998
_diffrn_reflns_point_group_measured_fraction_full  0.998
_reflns_number_total              6318
_reflns_number_gt                 5875
_reflns_threshold_expression      'I > 2\s(I)'
_reflns_Friedel_coverage          0.000
_reflns_Friedel_fraction_max      .
_reflns_Friedel_fraction_full     .
 
_reflns_special_details
;
 Reflections were merged by SHELXL according to the crystal
 class for the calculation of statistics and refinement.
 
 _reflns_Friedel_fraction is defined as the number of unique
 Friedel pairs measured divided by the number that would be
 possible theoretically, ignoring centric projections and
 systematic absences.
 The poor quality of reflections could be due to the fact that 
 the crystal does not diffract very well, and only it has 
 mesurated until 23.857 of  theta max 
The quality of the crystal was poor, but unfortunately attempts 
to obtain better ones using different solvents were unsuccesful

;
 
_computing_data_collection       'Bruker APEX3'
_computing_cell_refinement       'Bruker SAINT'
_computing_data_reduction        'Bruker SAINT'
_computing_structure_solution     'SHELXT 2014/5 (Sheldrick, 2014)'
_computing_structure_refinement 'SHELXL-2018/3 (Sheldrick, 2018)'
_computing_molecular_graphics    'Bruker SHELXTL'
_computing_publication_material  'Bruker SHELXTL'
_refine_special_details           ?
_refine_ls_structure_factor_coef  Fsqd
_refine_ls_matrix_type            full
_refine_ls_weighting_scheme       calc
_refine_ls_weighting_details
'w=1/[\s^2^(Fo^2^)+(0.0190P)^2^+17.7779P] where P=(Fo^2^+2Fc^2^)/3'
_atom_sites_solution_primary      ?
_atom_sites_solution_secondary    ?
_atom_sites_solution_hydrogens    geom
_refine_ls_hydrogen_treatment     constr
_refine_ls_extinction_method      none
_refine_ls_extinction_coef        .
_refine_ls_number_reflns          6318
_refine_ls_number_parameters      547
_refine_ls_number_restraints      21
_refine_ls_R_factor_all           0.0356
_refine_ls_R_factor_gt            0.0323
_refine_ls_wR_factor_ref          0.0736
_refine_ls_wR_factor_gt           0.0719
_refine_ls_goodness_of_fit_ref    1.144
_refine_ls_restrained_S_all       1.168
_refine_ls_shift/su_max           0.002
_refine_ls_shift/su_mean          0.000
 
loop_
 _atom_site_label
 _atom_site_type_symbol
 _atom_site_fract_x
 _atom_site_fract_y
 _atom_site_fract_z
 _atom_site_U_iso_or_equiv
 _atom_site_adp_type
 _atom_site_occupancy
 _atom_site_site_symmetry_order  
 _atom_site_calc_flag
 _atom_site_refinement_flags_posn
 _atom_site_refinement_flags_adp
 _atom_site_refinement_flags_occupancy
 _atom_site_disorder_assembly
 _atom_site_disorder_group
Tb1 Tb 0.76424(2) 0.68488(2) 0.69318(2) 0.01509(7) Uani 1 1 d . . . . .
F1 F 1.0013(3) 0.88704(12) 0.6537(2) 0.0491(8) Uani 1 1 d . . . . .
F2 F 1.1093(2) 0.83577(12) 0.75459(19) 0.0372(7) Uani 1 1 d . . . . .
F3 F 1.0631(3) 0.80691(13) 0.6216(2) 0.0428(7) Uani 1 1 d . . . . .
F4A F 0.6092(6) 0.5906(3) 0.9873(4) 0.0443(16) Uani 0.529(10) 1 d D . P A 1
F5A F 0.4933(7) 0.6468(3) 0.9021(5) 0.0443(16) Uani 0.529(10) 1 d D . P A 1
F6A F 0.5213(6) 0.5651(3) 0.8569(4) 0.0443(16) Uani 0.529(10) 1 d D . P A 1
F4B F 0.5184(9) 0.6511(4) 0.9297(6) 0.056(2) Uani 0.471(10) 1 d D . P A 2
F5B F 0.4762(7) 0.5925(3) 0.8255(5) 0.056(2) Uani 0.471(10) 1 d D . P A 2
F6B F 0.5836(7) 0.5669(3) 0.9522(6) 0.056(2) Uani 0.471(10) 1 d D . P A 2
F7 F 1.0724(3) 0.52363(13) 0.5804(3) 0.0572(10) Uani 1 1 d . . . . .
F8 F 1.0606(3) 0.60373(18) 0.5212(2) 0.0661(11) Uani 1 1 d . . . . .
F9 F 1.1445(2) 0.59385(13) 0.6575(2) 0.0446(8) Uani 1 1 d . . . . .
O1 O 0.9130(3) 0.75513(12) 0.70754(19) 0.0218(7) Uani 1 1 d . . . . .
O2 O 0.6777(3) 0.76750(12) 0.7276(2) 0.0251(7) Uani 1 1 d . . . . .
O3 O 0.6560(3) 0.65974(12) 0.80096(18) 0.0229(7) Uani 1 1 d . . . . .
O4 O 0.9043(3) 0.65329(12) 0.81804(18) 0.0223(7) Uani 1 1 d . . . . .
O5 O 0.9175(3) 0.63726(12) 0.64084(19) 0.0231(7) Uani 1 1 d . . . . .
O6 O 0.6952(3) 0.59563(12) 0.6582(2) 0.0232(7) Uani 1 1 d . . . . .
N1 N 0.5471(3) 0.69547(14) 0.5970(2) 0.0163(7) Uani 1 1 d . . . . .
N2 N 0.7441(3) 0.71973(15) 0.5370(2) 0.0188(8) Uani 1 1 d . . . . .
C1 C 0.4496(4) 0.68072(18) 0.6284(3) 0.0205(9) Uani 1 1 d . . . . .
H1 H 0.464180 0.662517 0.683984 0.025 Uiso 1 1 calc R U . . .
C2 C 0.3299(4) 0.69068(18) 0.5840(3) 0.0208(9) Uani 1 1 d . . . . .
H2 H 0.264209 0.679114 0.608748 0.025 Uiso 1 1 calc R U . . .
C3 C 0.3052(4) 0.71772(19) 0.5027(3) 0.0222(9) Uani 1 1 d . . . . .
C4 C 0.4062(4) 0.73306(18) 0.4708(3) 0.0206(9) Uani 1 1 d . . . . .
H4 H 0.393734 0.751904 0.415807 0.025 Uiso 1 1 calc R U . . .
C5 C 0.5247(4) 0.72131(16) 0.5179(3) 0.0143(8) Uani 1 1 d . . . . .
C6 C 0.6352(3) 0.73409(16) 0.4837(3) 0.0141(8) Uani 1 1 d . . . . .
C7 C 0.6263(4) 0.75719(17) 0.4011(3) 0.0168(9) Uani 1 1 d . . . . .
H7 H 0.548249 0.767825 0.365910 0.020 Uiso 1 1 calc R U . . .
C8 C 0.7310(4) 0.76488(17) 0.3694(3) 0.0176(9) Uani 1 1 d . . . . .
C9 C 0.8419(4) 0.74890(19) 0.4237(3) 0.0222(10) Uani 1 1 d . . . . .
H9 H 0.915693 0.752605 0.404080 0.027 Uiso 1 1 calc R U . . .
C10 C 0.8453(4) 0.72756(19) 0.5063(3) 0.0241(10) Uani 1 1 d . . . . .
H10 H 0.922854 0.717930 0.543295 0.029 Uiso 1 1 calc R U . . .
C11 C 0.1754(4) 0.7287(3) 0.4529(3) 0.0398(13) Uani 1 1 d . . . . .
H11A H 0.175634 0.746951 0.396720 0.060 Uiso 1 1 calc R U . . .
H11B H 0.135086 0.752626 0.488299 0.060 Uiso 1 1 calc R U . . .
H11C H 0.130573 0.693690 0.441130 0.060 Uiso 1 1 calc R U . . .
C12 C 0.7253(4) 0.78857(19) 0.2791(3) 0.0241(10) Uani 1 1 d . . . . .
H12A H 0.763563 0.762790 0.245107 0.036 Uiso 1 1 calc R U . . .
H12B H 0.769353 0.823851 0.285187 0.036 Uiso 1 1 calc R U . . .
H12C H 0.639215 0.794498 0.248184 0.036 Uiso 1 1 calc R U . . .
C13 C 1.0169(4) 0.83485(19) 0.6809(3) 0.0276(10) Uani 1 1 d . . . . .
C14 C 0.9019(4) 0.80729(18) 0.6980(3) 0.0212(9) Uani 1 1 d . . . . .
C15 C 0.8041(4) 0.84002(19) 0.7018(3) 0.0271(10) Uani 1 1 d . . . . .
H15 H 0.810222 0.878723 0.693971 0.033 Uiso 1 1 calc R U . . .
C16 C 0.6939(4) 0.81816(19) 0.7171(3) 0.0249(10) Uani 1 1 d . . . . .
C17 C 0.5875(5) 0.8557(2) 0.7161(3) 0.0343(12) Uani 1 1 d . . . . .
C18 C 0.6018(5) 0.9104(2) 0.7391(3) 0.0335(11) Uani 1 1 d . . . . .
H18 H 0.682108 0.925077 0.760089 0.040 Uiso 1 1 calc R U . . .
C19 C 0.5002(6) 0.9446(3) 0.7323(4) 0.0546(16) Uani 1 1 d . . . . .
H19 H 0.511452 0.982129 0.749832 0.066 Uiso 1 1 calc R U . . .
C20 C 0.3833(6) 0.9241(3) 0.7001(5) 0.0604(18) Uani 1 1 d . . . . .
H20 H 0.314022 0.947623 0.694614 0.073 Uiso 1 1 calc R U . . .
C21 C 0.3670(5) 0.8690(3) 0.6756(5) 0.0561(17) Uani 1 1 d . . . . .
H21 H 0.286860 0.854562 0.652763 0.067 Uiso 1 1 calc R U . . .
C22 C 0.4705(5) 0.8350(2) 0.6851(4) 0.0396(13) Uani 1 1 d . . . . .
H22 H 0.459945 0.797022 0.669901 0.048 Uiso 1 1 calc R U . . .
C23 C 0.5732(4) 0.60818(18) 0.8993(3) 0.0313(11) Uani 1 1 d D . . . .
C24 C 0.6836(4) 0.62648(17) 0.8656(3) 0.0231(10) Uani 1 1 d . . . . .
C25 C 0.7967(4) 0.60560(19) 0.9070(3) 0.0277(10) Uani 1 1 d . . . . .
H25 H 0.802397 0.580952 0.955349 0.033 Uiso 1 1 calc R U . . .
C26 C 0.9049(4) 0.61956(17) 0.8802(3) 0.0220(9) Uani 1 1 d . . . . .
C27 C 1.0248(4) 0.59352(17) 0.9220(3) 0.0254(10) Uani 1 1 d . . . . .
C28 C 1.0508(5) 0.57003(19) 1.0063(3) 0.0332(11) Uani 1 1 d . . . . .
H28 H 0.990536 0.570319 1.040197 0.040 Uiso 1 1 calc R U . . .
C29 C 1.1653(5) 0.5462(2) 1.0404(4) 0.0453(15) Uani 1 1 d . . . . .
H29 H 1.182936 0.530331 1.097906 0.054 Uiso 1 1 calc R U . . .
C30 C 1.2530(5) 0.5452(2) 0.9922(4) 0.0480(15) Uani 1 1 d . . . . .
H30 H 1.331168 0.529085 1.016337 0.058 Uiso 1 1 calc R U . . .
C31 C 1.2272(5) 0.5676(2) 0.9084(4) 0.0462(15) Uani 1 1 d . . . . .
H31 H 1.287010 0.566241 0.874143 0.055 Uiso 1 1 calc R U . . .
C32 C 1.1143(4) 0.5923(2) 0.8741(4) 0.0344(12) Uani 1 1 d . . . . .
H32 H 1.098147 0.608539 0.816942 0.041 Uiso 1 1 calc R U . . .
C33 C 1.0512(4) 0.5768(2) 0.5932(3) 0.0345(12) Uani 1 1 d . . . . .
C34 C 0.9271(4) 0.58798(19) 0.6158(3) 0.0241(10) Uani 1 1 d . . . . .
C35 C 0.8435(4) 0.54576(19) 0.6063(3) 0.0279(10) Uani 1 1 d . . . . .
H35 H 0.863730 0.511195 0.584615 0.033 Uiso 1 1 calc R U . . .
C36 C 0.7277(4) 0.55180(18) 0.6278(3) 0.0217(9) Uani 1 1 d . . . . .
C37 C 0.6400(4) 0.50451(18) 0.6171(3) 0.0226(10) Uani 1 1 d . . . . .
C38 C 0.6450(5) 0.4606(2) 0.5618(4) 0.0367(12) Uani 1 1 d . . . . .
H38 H 0.707555 0.458978 0.529856 0.044 Uiso 1 1 calc R U . . .
C39 C 0.5586(5) 0.4187(2) 0.5528(4) 0.0438(14) Uani 1 1 d . . . . .
H39 H 0.563048 0.388530 0.514694 0.053 Uiso 1 1 calc R U . . .
C40 C 0.4676(5) 0.4197(2) 0.5972(3) 0.0386(13) Uani 1 1 d . . . . .
H40 H 0.408102 0.391025 0.589601 0.046 Uiso 1 1 calc R U . . .
C41 C 0.4634(6) 0.4635(2) 0.6539(4) 0.0567(18) Uani 1 1 d . . . . .
H41 H 0.402104 0.464469 0.686936 0.068 Uiso 1 1 calc R U . . .
C42 C 0.5485(5) 0.5060(2) 0.6623(4) 0.0438(14) Uani 1 1 d . . . . .
H42 H 0.543566 0.536393 0.699841 0.053 Uiso 1 1 calc R U . . .
 
loop_
 _atom_site_aniso_label
 _atom_site_aniso_U_11
 _atom_site_aniso_U_22
 _atom_site_aniso_U_33
 _atom_site_aniso_U_23
 _atom_site_aniso_U_13
 _atom_site_aniso_U_12
Tb1 0.01409(11) 0.01615(11) 0.01448(11) 0.00117(8) 0.00234(7) -0.00092(8)
F1 0.0385(17) 0.0348(17) 0.075(2) 0.0260(16) 0.0165(16) -0.0038(14)
F2 0.0264(14) 0.0409(17) 0.0425(17) -0.0014(13) 0.0046(13) -0.0082(13)
F3 0.0429(17) 0.0482(18) 0.0438(17) -0.0035(15) 0.0233(14) -0.0123(14)
F4A 0.037(2) 0.047(3) 0.057(3) -0.0012(19) 0.028(2) -0.0036(17)
F5A 0.037(2) 0.047(3) 0.057(3) -0.0012(19) 0.028(2) -0.0036(17)
F6A 0.037(2) 0.047(3) 0.057(3) -0.0012(19) 0.028(2) -0.0036(17)
F4B 0.052(3) 0.049(3) 0.082(4) 0.027(3) 0.042(3) 0.013(2)
F5B 0.052(3) 0.049(3) 0.082(4) 0.027(3) 0.042(3) 0.013(2)
F6B 0.052(3) 0.049(3) 0.082(4) 0.027(3) 0.042(3) 0.013(2)
F7 0.0376(18) 0.0439(19) 0.098(3) -0.0323(19) 0.0315(18) -0.0017(15)
F8 0.047(2) 0.106(3) 0.056(2) 0.018(2) 0.0344(18) 0.010(2)
F9 0.0224(15) 0.0547(19) 0.057(2) -0.0210(16) 0.0092(14) -0.0003(14)
O1 0.0188(15) 0.0202(16) 0.0252(16) 0.0014(13) 0.0028(12) -0.0047(12)
O2 0.0254(16) 0.0201(17) 0.0315(17) -0.0057(13) 0.0099(14) -0.0031(13)
O3 0.0227(16) 0.0283(17) 0.0185(15) 0.0046(13) 0.0063(13) 0.0038(13)
O4 0.0205(15) 0.0248(16) 0.0189(15) 0.0068(13) -0.0005(12) -0.0039(13)
O5 0.0219(16) 0.0226(16) 0.0257(16) -0.0007(13) 0.0072(13) -0.0023(13)
O6 0.0232(16) 0.0170(16) 0.0307(17) -0.0023(13) 0.0089(13) 0.0004(13)
N1 0.0185(18) 0.0181(18) 0.0132(17) -0.0018(14) 0.0055(14) -0.0032(14)
N2 0.0121(17) 0.027(2) 0.0163(18) 0.0026(15) 0.0011(14) -0.0012(15)
C1 0.021(2) 0.026(2) 0.015(2) 0.0002(18) 0.0061(17) -0.0031(19)
C2 0.015(2) 0.032(2) 0.017(2) -0.0037(19) 0.0082(17) -0.0059(18)
C3 0.015(2) 0.030(2) 0.021(2) -0.0008(19) 0.0045(18) -0.0009(18)
C4 0.018(2) 0.027(2) 0.018(2) 0.0058(18) 0.0057(18) -0.0001(18)
C5 0.014(2) 0.014(2) 0.015(2) -0.0040(16) 0.0037(16) -0.0027(16)
C6 0.013(2) 0.013(2) 0.017(2) -0.0037(16) 0.0048(16) -0.0041(16)
C7 0.014(2) 0.020(2) 0.016(2) 0.0014(17) 0.0020(17) 0.0008(17)
C8 0.017(2) 0.018(2) 0.018(2) -0.0017(17) 0.0042(17) -0.0047(17)
C9 0.011(2) 0.034(3) 0.023(2) 0.0047(19) 0.0062(17) -0.0046(18)
C10 0.013(2) 0.039(3) 0.020(2) 0.007(2) 0.0017(17) -0.0015(19)
C11 0.019(2) 0.068(4) 0.034(3) 0.021(3) 0.010(2) 0.005(2)
C12 0.019(2) 0.033(3) 0.021(2) 0.0065(19) 0.0068(19) -0.0022(19)
C13 0.026(2) 0.025(2) 0.031(3) 0.000(2) 0.004(2) -0.007(2)
C14 0.021(2) 0.024(2) 0.017(2) 0.0012(18) 0.0005(17) -0.0054(19)
C15 0.028(2) 0.019(2) 0.034(3) 0.004(2) 0.007(2) -0.0013(19)
C16 0.024(2) 0.025(3) 0.024(2) -0.0081(19) 0.0025(19) -0.002(2)
C17 0.032(3) 0.029(3) 0.044(3) -0.008(2) 0.013(2) -0.001(2)
C18 0.028(3) 0.029(3) 0.042(3) -0.009(2) 0.007(2) 0.002(2)
C19 0.057(4) 0.036(3) 0.073(4) -0.017(3) 0.019(3) 0.003(3)
C20 0.048(4) 0.048(4) 0.090(5) -0.013(3) 0.026(4) 0.014(3)
C21 0.036(3) 0.045(4) 0.090(5) -0.010(3) 0.022(3) 0.002(3)
C22 0.029(3) 0.032(3) 0.063(4) -0.011(3) 0.022(3) -0.001(2)
C23 0.038(3) 0.024(3) 0.036(3) 0.009(2) 0.016(2) 0.010(2)
C24 0.032(3) 0.017(2) 0.024(2) 0.0005(19) 0.014(2) 0.0032(19)
C25 0.034(3) 0.023(2) 0.028(2) 0.011(2) 0.011(2) 0.008(2)
C26 0.026(2) 0.019(2) 0.019(2) -0.0012(18) 0.0025(18) -0.0010(19)
C27 0.028(2) 0.014(2) 0.031(3) -0.0005(19) 0.000(2) -0.0034(19)
C28 0.042(3) 0.023(3) 0.031(3) 0.000(2) 0.000(2) 0.002(2)
C29 0.052(4) 0.027(3) 0.043(3) 0.006(2) -0.017(3) 0.006(3)
C30 0.032(3) 0.029(3) 0.073(4) 0.006(3) -0.009(3) 0.003(2)
C31 0.022(3) 0.042(3) 0.071(4) 0.009(3) 0.003(3) 0.000(2)
C32 0.027(3) 0.031(3) 0.043(3) 0.009(2) 0.003(2) 0.000(2)
C33 0.027(3) 0.038(3) 0.040(3) -0.011(2) 0.013(2) -0.003(2)
C34 0.020(2) 0.031(3) 0.022(2) -0.0061(19) 0.0068(18) 0.0017(19)
C35 0.026(2) 0.024(2) 0.033(3) -0.009(2) 0.007(2) 0.002(2)
C36 0.022(2) 0.021(2) 0.020(2) 0.0007(18) 0.0020(18) 0.0004(19)
C37 0.027(2) 0.018(2) 0.022(2) -0.0003(18) 0.0030(19) 0.0003(18)
C38 0.035(3) 0.029(3) 0.048(3) -0.015(2) 0.014(2) -0.003(2)
C39 0.050(3) 0.026(3) 0.056(4) -0.019(3) 0.013(3) -0.010(2)
C40 0.049(3) 0.026(3) 0.042(3) -0.001(2) 0.013(3) -0.017(2)
C41 0.070(4) 0.040(3) 0.077(4) -0.012(3) 0.050(4) -0.025(3)
C42 0.057(4) 0.024(3) 0.060(4) -0.012(3) 0.035(3) -0.015(3)
 
_geom_special_details
;
 All esds (except the esd in the dihedral angle between two l.s. planes)
 are estimated using the full covariance matrix.  The cell esds are taken
 into account individually in the estimation of esds in distances, angles
 and torsion angles; correlations between esds in cell parameters are only
 used when they are defined by crystal symmetry.  An approximate (isotropic)
 treatment of cell esds is used for estimating esds involving l.s. planes.
;
 
loop_
 _geom_bond_atom_site_label_1
 _geom_bond_atom_site_label_2
 _geom_bond_distance
 _geom_bond_site_symmetry_2
 _geom_bond_publ_flag
Tb1 O6 2.317(3) . ?
Tb1 O4 2.317(3) . ?
Tb1 O2 2.340(3) . ?
Tb1 O1 2.354(3) . ?
Tb1 O5 2.366(3) . ?
Tb1 O3 2.370(3) . ?
Tb1 N2 2.530(3) . ?
Tb1 N1 2.547(3) . ?
F1 C13 1.331(5) . ?
F2 C13 1.350(5) . ?
F3 C13 1.341(6) . ?
F4A C23 1.399(7) . ?
F5A C23 1.303(8) . ?
F6A C23 1.297(7) . ?
F4B C23 1.349(9) . ?
F5B C23 1.432(8) . ?
F6B C23 1.282(7) . ?
F7 C33 1.333(6) . ?
F8 C33 1.322(6) . ?
F9 C33 1.329(6) . ?
O1 C14 1.275(5) . ?
O2 C16 1.257(5) . ?
O3 C24 1.268(5) . ?
O4 C26 1.264(5) . ?
O5 C34 1.268(5) . ?
O6 C36 1.251(5) . ?
N1 C1 1.344(5) . ?
N1 C5 1.351(5) . ?
N2 C10 1.344(5) . ?
N2 C6 1.347(5) . ?
C1 C2 1.375(6) . ?
C1 H1 0.9500 . ?
C2 C3 1.392(6) . ?
C2 H2 0.9500 . ?
C3 C4 1.389(6) . ?
C3 C11 1.499(6) . ?
C4 C5 1.384(6) . ?
C4 H4 0.9500 . ?
C5 C6 1.490(5) . ?
C6 C7 1.384(6) . ?
C7 C8 1.388(6) . ?
C7 H7 0.9500 . ?
C8 C9 1.381(6) . ?
C8 C12 1.504(6) . ?
C9 C10 1.378(6) . ?
C9 H9 0.9500 . ?
C10 H10 0.9500 . ?
C11 H11A 0.9800 . ?
C11 H11B 0.9800 . ?
C11 H11C 0.9800 . ?
C12 H12A 0.9800 . ?
C12 H12B 0.9800 . ?
C12 H12C 0.9800 . ?
C13 C14 1.530(6) . ?
C14 C15 1.364(6) . ?
C15 C16 1.413(6) . ?
C15 H15 0.9500 . ?
C16 C17 1.496(7) . ?
C17 C18 1.371(7) . ?
C17 C22 1.378(7) . ?
C18 C19 1.389(8) . ?
C18 H18 0.9500 . ?
C19 C20 1.378(9) . ?
C19 H19 0.9500 . ?
C20 C21 1.387(9) . ?
C20 H20 0.9500 . ?
C21 C22 1.400(8) . ?
C21 H21 0.9500 . ?
C22 H22 0.9500 . ?
C23 C24 1.519(6) . ?
C24 C25 1.374(6) . ?
C25 C26 1.413(6) . ?
C25 H25 0.9500 . ?
C26 C27 1.486(6) . ?
C27 C32 1.384(7) . ?
C27 C28 1.394(7) . ?
C28 C29 1.392(7) . ?
C28 H28 0.9500 . ?
C29 C30 1.369(9) . ?
C29 H29 0.9500 . ?
C30 C31 1.378(8) . ?
C30 H30 0.9500 . ?
C31 C32 1.385(7) . ?
C31 H31 0.9500 . ?
C32 H32 0.9500 . ?
C33 C34 1.535(6) . ?
C34 C35 1.370(6) . ?
C35 C36 1.420(6) . ?
C35 H35 0.9500 . ?
C36 C37 1.492(6) . ?
C37 C42 1.373(7) . ?
C37 C38 1.379(6) . ?
C38 C39 1.385(7) . ?
C38 H38 0.9500 . ?
C39 C40 1.360(8) . ?
C39 H39 0.9500 . ?
C40 C41 1.387(8) . ?
C40 H40 0.9500 . ?
C41 C42 1.387(7) . ?
C41 H41 0.9500 . ?
C42 H42 0.9500 . ?
 
loop_
 _geom_angle_atom_site_label_1
 _geom_angle_atom_site_label_2
 _geom_angle_atom_site_label_3
 _geom_angle
 _geom_angle_site_symmetry_1
 _geom_angle_site_symmetry_3
 _geom_angle_publ_flag
O6 Tb1 O4 90.60(10) . . ?
O6 Tb1 O2 135.92(10) . . ?
O4 Tb1 O2 108.97(11) . . ?
O6 Tb1 O1 152.36(10) . . ?
O4 Tb1 O1 80.59(10) . . ?
O2 Tb1 O1 71.47(10) . . ?
O6 Tb1 O5 72.12(10) . . ?
O4 Tb1 O5 74.10(10) . . ?
O2 Tb1 O5 150.33(10) . . ?
O1 Tb1 O5 80.26(10) . . ?
O6 Tb1 O3 74.23(10) . . ?
O4 Tb1 O3 71.33(10) . . ?
O2 Tb1 O3 75.46(10) . . ?
O1 Tb1 O3 125.99(10) . . ?
O5 Tb1 O3 130.72(10) . . ?
O6 Tb1 N2 97.87(11) . . ?
O4 Tb1 N2 143.45(10) . . ?
O2 Tb1 N2 89.23(11) . . ?
O1 Tb1 N2 75.53(10) . . ?
O5 Tb1 N2 74.89(10) . . ?
O3 Tb1 N2 145.16(10) . . ?
O6 Tb1 N1 74.76(10) . . ?
O4 Tb1 N1 152.50(10) . . ?
O2 Tb1 N1 70.06(10) . . ?
O1 Tb1 N1 122.55(10) . . ?
O5 Tb1 N1 121.05(10) . . ?
O3 Tb1 N1 82.20(10) . . ?
N2 Tb1 N1 63.08(10) . . ?
C14 O1 Tb1 131.1(3) . . ?
C16 O2 Tb1 136.5(3) . . ?
C24 O3 Tb1 130.9(3) . . ?
C26 O4 Tb1 137.2(3) . . ?
C34 O5 Tb1 133.3(3) . . ?
C36 O6 Tb1 140.3(3) . . ?
C1 N1 C5 117.5(3) . . ?
C1 N1 Tb1 120.2(3) . . ?
C5 N1 Tb1 121.8(3) . . ?
C10 N2 C6 117.4(3) . . ?
C10 N2 Tb1 119.9(3) . . ?
C6 N2 Tb1 122.6(3) . . ?
N1 C1 C2 123.3(4) . . ?
N1 C1 H1 118.4 . . ?
C2 C1 H1 118.4 . . ?
C1 C2 C3 119.9(4) . . ?
C1 C2 H2 120.0 . . ?
C3 C2 H2 120.0 . . ?
C4 C3 C2 116.6(4) . . ?
C4 C3 C11 122.6(4) . . ?
C2 C3 C11 120.8(4) . . ?
C5 C4 C3 121.0(4) . . ?
C5 C4 H4 119.5 . . ?
C3 C4 H4 119.5 . . ?
N1 C5 C4 121.7(4) . . ?
N1 C5 C6 115.5(3) . . ?
C4 C5 C6 122.8(4) . . ?
N2 C6 C7 122.1(4) . . ?
N2 C6 C5 115.7(3) . . ?
C7 C6 C5 122.2(4) . . ?
C6 C7 C8 120.3(4) . . ?
C6 C7 H7 119.9 . . ?
C8 C7 H7 119.9 . . ?
C9 C8 C7 117.2(4) . . ?
C9 C8 C12 120.8(4) . . ?
C7 C8 C12 122.0(4) . . ?
C10 C9 C8 119.9(4) . . ?
C10 C9 H9 120.1 . . ?
C8 C9 H9 120.1 . . ?
N2 C10 C9 123.1(4) . . ?
N2 C10 H10 118.5 . . ?
C9 C10 H10 118.4 . . ?
C3 C11 H11A 109.5 . . ?
C3 C11 H11B 109.5 . . ?
H11A C11 H11B 109.5 . . ?
C3 C11 H11C 109.5 . . ?
H11A C11 H11C 109.5 . . ?
H11B C11 H11C 109.5 . . ?
C8 C12 H12A 109.5 . . ?
C8 C12 H12B 109.5 . . ?
H12A C12 H12B 109.5 . . ?
C8 C12 H12C 109.5 . . ?
H12A C12 H12C 109.5 . . ?
H12B C12 H12C 109.5 . . ?
F1 C13 F3 107.7(4) . . ?
F1 C13 F2 105.7(4) . . ?
F3 C13 F2 104.4(4) . . ?
F1 C13 C14 114.6(4) . . ?
F3 C13 C14 112.2(4) . . ?
F2 C13 C14 111.5(4) . . ?
O1 C14 C15 128.9(4) . . ?
O1 C14 C13 112.9(4) . . ?
C15 C14 C13 118.1(4) . . ?
C14 C15 C16 122.1(4) . . ?
C14 C15 H15 119.0 . . ?
C16 C15 H15 119.0 . . ?
O2 C16 C15 123.1(4) . . ?
O2 C16 C17 117.2(4) . . ?
C15 C16 C17 119.6(4) . . ?
C18 C17 C22 119.1(5) . . ?
C18 C17 C16 122.8(4) . . ?
C22 C17 C16 118.0(4) . . ?
C17 C18 C19 120.8(5) . . ?
C17 C18 H18 119.6 . . ?
C19 C18 H18 119.6 . . ?
C20 C19 C18 120.2(5) . . ?
C20 C19 H19 119.9 . . ?
C18 C19 H19 119.9 . . ?
C19 C20 C21 119.8(6) . . ?
C19 C20 H20 120.1 . . ?
C21 C20 H20 120.1 . . ?
C20 C21 C22 119.0(6) . . ?
C20 C21 H21 120.5 . . ?
C22 C21 H21 120.5 . . ?
C17 C22 C21 121.1(5) . . ?
C17 C22 H22 119.5 . . ?
C21 C22 H22 119.5 . . ?
F6A C23 F5A 111.6(5) . . ?
F6B C23 F4B 110.8(6) . . ?
F6A C23 F4A 104.1(5) . . ?
F5A C23 F4A 103.1(5) . . ?
F6B C23 F5B 104.1(6) . . ?
F4B C23 F5B 99.5(6) . . ?
F6B C23 C24 119.4(5) . . ?
F6A C23 C24 111.2(4) . . ?
F5A C23 C24 115.0(5) . . ?
F4B C23 C24 111.8(6) . . ?
F4A C23 C24 110.9(4) . . ?
F5B C23 C24 109.0(4) . . ?
O3 C24 C25 129.1(4) . . ?
O3 C24 C23 113.2(4) . . ?
C25 C24 C23 117.8(4) . . ?
C24 C25 C26 122.2(4) . . ?
C24 C25 H25 118.9 . . ?
C26 C25 H25 118.9 . . ?
O4 C26 C25 122.1(4) . . ?
O4 C26 C27 116.8(4) . . ?
C25 C26 C27 121.1(4) . . ?
C32 C27 C28 118.8(4) . . ?
C32 C27 C26 117.8(4) . . ?
C28 C27 C26 123.4(4) . . ?
C29 C28 C27 119.7(5) . . ?
C29 C28 H28 120.1 . . ?
C27 C28 H28 120.1 . . ?
C30 C29 C28 120.9(5) . . ?
C30 C29 H29 119.6 . . ?
C28 C29 H29 119.6 . . ?
C29 C30 C31 119.6(5) . . ?
C29 C30 H30 120.2 . . ?
C31 C30 H30 120.2 . . ?
C30 C31 C32 120.1(6) . . ?
C30 C31 H31 119.9 . . ?
C32 C31 H31 119.9 . . ?
C27 C32 C31 120.9(5) . . ?
C27 C32 H32 119.6 . . ?
C31 C32 H32 119.6 . . ?
F8 C33 F9 106.1(4) . . ?
F8 C33 F7 107.3(4) . . ?
F9 C33 F7 106.0(4) . . ?
F8 C33 C34 111.4(4) . . ?
F9 C33 C34 111.4(4) . . ?
F7 C33 C34 114.0(4) . . ?
O5 C34 C35 129.1(4) . . ?
O5 C34 C33 112.5(4) . . ?
C35 C34 C33 118.4(4) . . ?
C34 C35 C36 122.4(4) . . ?
C34 C35 H35 118.8 . . ?
C36 C35 H35 118.8 . . ?
O6 C36 C35 122.7(4) . . ?
O6 C36 C37 116.8(4) . . ?
C35 C36 C37 120.5(4) . . ?
C42 C37 C38 119.0(4) . . ?
C42 C37 C36 118.3(4) . . ?
C38 C37 C36 122.6(4) . . ?
C37 C38 C39 119.8(5) . . ?
C37 C38 H38 120.1 . . ?
C39 C38 H38 120.1 . . ?
C40 C39 C38 121.7(5) . . ?
C40 C39 H39 119.2 . . ?
C38 C39 H39 119.2 . . ?
C39 C40 C41 118.6(5) . . ?
C39 C40 H40 120.7 . . ?
C41 C40 H40 120.7 . . ?
C42 C41 C40 120.1(5) . . ?
C42 C41 H41 120.0 . . ?
C40 C41 H41 120.0 . . ?
C37 C42 C41 120.8(5) . . ?
C37 C42 H42 119.6 . . ?
C41 C42 H42 119.6 . . ?
 
_refine_diff_density_max    1.250
_refine_diff_density_min   -1.358
_refine_diff_density_rms    0.086

_shelx_res_file
;
TITL mo_IALVB118_0m_a.res in P2(1)/n
    mo_IALVB118_0m_a.res
    created by SHELXL-2018/3 at 12:32:10 on 14-Oct-2019
REM Old TITL mo_IALVB118_0m in P2(1)/n

REM SHELXT solution in P2(1)/n
REM R1 0.086,  Rweak 0.006,  Alpha 0.045,  Orientation as input
REM Formula found by SHELXT:  C41 F9 N3 O6 Tb

CELL  0.71073  11.1935  24.2208  15.5561   90.000  103.718   90.000
ZERR    4.000   0.0004   0.0007   0.0005    0.000    0.001    0.000
LATT  1
SYMM 1/2-X, 1/2+Y, 1/2-Z
SFAC C H F N O TB
UNIT 168 120 36 8 24 4
TEMP -173.150
L.S. 10
BOND $H
ACTA
OMIT     -1   0   1
OMIT      0   2   1
OMIT     -9   0   1
SADI 0.02 F4A C23 F5A C23 F6A C23 F4B C23 F5B C23 F6B C23
SADI 0.02 F4A F5A F5A F6A F6A F4A
SADI 0.02 F4B F5B F5B F6B F6B F4B
EADP F4A F5A F6A
EADP F4B F5B F6B
LIST 6
FMAP 2
PLAN 20
WGHT    0.019000   17.777901
FVAR       0.27875   0.52926
TB1   6    0.764240    0.684882    0.693180    11.00000    0.01409    0.01615 =
         0.01448    0.00117    0.00234   -0.00092
F1    3    1.001270    0.887037    0.653736    11.00000    0.03851    0.03479 =
         0.07536    0.02597    0.01646   -0.00377
F2    3    1.109324    0.835770    0.754586    11.00000    0.02635    0.04087 =
         0.04254   -0.00142    0.00458   -0.00820
F3    3    1.063114    0.806915    0.621644    11.00000    0.04288    0.04815 =
         0.04381   -0.00354    0.02331   -0.01231
PART 1
F4A   3    0.609191    0.590572    0.987337    21.00000    0.03663    0.04734 =
         0.05748   -0.00124    0.02791   -0.00358
F5A   3    0.493310    0.646847    0.902088    21.00000    0.03663    0.04734 =
         0.05748   -0.00124    0.02791   -0.00358
F6A   3    0.521303    0.565061    0.856856    21.00000    0.03663    0.04734 =
         0.05748   -0.00124    0.02791   -0.00358
PART 2
F4B   3    0.518395    0.651107    0.929720   -21.00000    0.05203    0.04870 =
         0.08151    0.02693    0.04193    0.01326
F5B   3    0.476167    0.592470    0.825479   -21.00000    0.05203    0.04870 =
         0.08151    0.02693    0.04193    0.01326
F6B   3    0.583598    0.566917    0.952208   -21.00000    0.05203    0.04870 =
         0.08151    0.02693    0.04193    0.01326
PART 0
F7    3    1.072386    0.523627    0.580433    11.00000    0.03764    0.04387 =
         0.09784   -0.03227    0.03153   -0.00173
F8    3    1.060567    0.603735    0.521177    11.00000    0.04692    0.10637 =
         0.05624    0.01836    0.03443    0.00992
F9    3    1.144495    0.593852    0.657500    11.00000    0.02237    0.05468 =
         0.05662   -0.02101    0.00921   -0.00027
O1    5    0.912991    0.755127    0.707542    11.00000    0.01875    0.02015 =
         0.02518    0.00144    0.00280   -0.00470
O2    5    0.677674    0.767496    0.727570    11.00000    0.02537    0.02008 =
         0.03154   -0.00566    0.00989   -0.00313
O3    5    0.655959    0.659737    0.800960    11.00000    0.02266    0.02825 =
         0.01852    0.00457    0.00632    0.00384
O4    5    0.904253    0.653293    0.818041    11.00000    0.02048    0.02478 =
         0.01892    0.00677   -0.00047   -0.00388
O5    5    0.917465    0.637262    0.640843    11.00000    0.02186    0.02262 =
         0.02571   -0.00070    0.00723   -0.00229
O6    5    0.695166    0.595628    0.658191    11.00000    0.02320    0.01702 =
         0.03068   -0.00230    0.00885    0.00036
N1    4    0.547088    0.695467    0.597029    11.00000    0.01849    0.01806 =
         0.01323   -0.00179    0.00554   -0.00321
N2    4    0.744058    0.719733    0.537044    11.00000    0.01211    0.02667 =
         0.01632    0.00262    0.00108   -0.00118
C1    1    0.449628    0.680723    0.628375    11.00000    0.02135    0.02591 =
         0.01502    0.00024    0.00614   -0.00307
AFIX  43
H1    2    0.464180    0.662517    0.683984    11.00000   -1.20000
AFIX   0
C2    1    0.329931    0.690676    0.583980    11.00000    0.01508    0.03211 =
         0.01742   -0.00369    0.00820   -0.00594
AFIX  43
H2    2    0.264209    0.679114    0.608748    11.00000   -1.20000
AFIX   0
C3    1    0.305183    0.717715    0.502693    11.00000    0.01489    0.03032 =
         0.02146   -0.00076    0.00452   -0.00089
C4    1    0.406166    0.733060    0.470778    11.00000    0.01819    0.02653 =
         0.01773    0.00584    0.00575   -0.00013
AFIX  43
H4    2    0.393734    0.751904    0.415807    11.00000   -1.20000
AFIX   0
C5    1    0.524652    0.721312    0.517856    11.00000    0.01449    0.01354 =
         0.01503   -0.00404    0.00370   -0.00272
C6    1    0.635194    0.734091    0.483701    11.00000    0.01275    0.01319 =
         0.01706   -0.00368    0.00482   -0.00409
C7    1    0.626321    0.757190    0.401069    11.00000    0.01370    0.01992 =
         0.01607    0.00141    0.00200    0.00076
AFIX  43
H7    2    0.548249    0.767825    0.365910    11.00000   -1.20000
AFIX   0
C8    1    0.731022    0.764881    0.369354    11.00000    0.01682    0.01763 =
         0.01838   -0.00168    0.00423   -0.00467
C9    1    0.841898    0.748898    0.423661    11.00000    0.01121    0.03357 =
         0.02284    0.00466    0.00622   -0.00462
AFIX  43
H9    2    0.915693    0.752605    0.404080    11.00000   -1.20000
AFIX   0
C10   1    0.845288    0.727562    0.506299    11.00000    0.01251    0.03857 =
         0.02020    0.00702    0.00171   -0.00151
AFIX  43
H10   2    0.922854    0.717930    0.543295    11.00000   -1.20000
AFIX   0
C11   1    0.175378    0.728696    0.452898    11.00000    0.01866    0.06825 =
         0.03409    0.02075    0.00955    0.00549
AFIX 137
H11A  2    0.175634    0.746951    0.396720    11.00000   -1.50000
H11B  2    0.135086    0.752626    0.488299    11.00000   -1.50000
H11C  2    0.130573    0.693690    0.441130    11.00000   -1.50000
AFIX   0
C12   1    0.725289    0.788568    0.279097    11.00000    0.01940    0.03275 =
         0.02116    0.00646    0.00684   -0.00215
AFIX 137
H12A  2    0.763563    0.762790    0.245107    11.00000   -1.50000
H12B  2    0.769353    0.823851    0.285187    11.00000   -1.50000
H12C  2    0.639215    0.794498    0.248184    11.00000   -1.50000
AFIX   0
C13   1    1.016929    0.834853    0.680853    11.00000    0.02582    0.02487 =
         0.03071    0.00011    0.00376   -0.00697
C14   1    0.901851    0.807287    0.698048    11.00000    0.02067    0.02391 =
         0.01716    0.00120    0.00054   -0.00537
C15   1    0.804061    0.840021    0.701846    11.00000    0.02785    0.01879 =
         0.03446    0.00438    0.00702   -0.00129
AFIX  43
H15   2    0.810222    0.878723    0.693971    11.00000   -1.20000
AFIX   0
C16   1    0.693873    0.818156    0.717131    11.00000    0.02450    0.02470 =
         0.02382   -0.00813    0.00250   -0.00250
C17   1    0.587484    0.855735    0.716088    11.00000    0.03229    0.02934 =
         0.04355   -0.00837    0.01330   -0.00095
C18   1    0.601772    0.910382    0.739146    11.00000    0.02829    0.02904 =
         0.04240   -0.00938    0.00677    0.00200
AFIX  43
H18   2    0.682108    0.925077    0.760089    11.00000   -1.20000
AFIX   0
C19   1    0.500234    0.944551    0.732274    11.00000    0.05695    0.03559 =
         0.07292   -0.01656    0.01861    0.00294
AFIX  43
H19   2    0.511452    0.982129    0.749832    11.00000   -1.20000
AFIX   0
C20   1    0.383301    0.924082    0.700061    11.00000    0.04848    0.04784 =
         0.08973   -0.01283    0.02580    0.01409
AFIX  43
H20   2    0.314022    0.947623    0.694614    11.00000   -1.20000
AFIX   0
C21   1    0.367027    0.868998    0.675603    11.00000    0.03602    0.04520 =
         0.09047   -0.01048    0.02190    0.00242
AFIX  43
H21   2    0.286860    0.854562    0.652763    11.00000   -1.20000
AFIX   0
C22   1    0.470526    0.834996    0.685085    11.00000    0.02927    0.03160 =
         0.06331   -0.01055    0.02156   -0.00136
AFIX  43
H22   2    0.459945    0.797022    0.669901    11.00000   -1.20000
AFIX   0
C23   1    0.573169    0.608179    0.899294    11.00000    0.03779    0.02425 =
         0.03572    0.00863    0.01630    0.00975
C24   1    0.683621    0.626485    0.865626    11.00000    0.03232    0.01662 =
         0.02381    0.00052    0.01360    0.00318
C25   1    0.796734    0.605597    0.907041    11.00000    0.03440    0.02320 =
         0.02756    0.01084    0.01126    0.00758
AFIX  43
H25   2    0.802397    0.580952    0.955349    11.00000   -1.20000
AFIX   0
C26   1    0.904918    0.619563    0.880154    11.00000    0.02632    0.01914 =
         0.01915   -0.00122    0.00253   -0.00103
C27   1    1.024837    0.593520    0.922037    11.00000    0.02755    0.01444 =
         0.03065   -0.00050   -0.00030   -0.00336
C28   1    1.050782    0.570031    1.006255    11.00000    0.04163    0.02259 =
         0.03112    0.00014    0.00034    0.00241
AFIX  43
H28   2    0.990536    0.570319    1.040197    11.00000   -1.20000
AFIX   0
C29   1    1.165342    0.546154    1.040394    11.00000    0.05176    0.02693 =
         0.04269    0.00630   -0.01748    0.00551
AFIX  43
H29   2    1.182936    0.530331    1.097906    11.00000   -1.20000
AFIX   0
C30   1    1.253009    0.545172    0.992179    11.00000    0.03192    0.02904 =
         0.07252    0.00566   -0.00860    0.00273
AFIX  43
H30   2    1.331168    0.529085    1.016337    11.00000   -1.20000
AFIX   0
C31   1    1.227225    0.567649    0.908417    11.00000    0.02168    0.04248 =
         0.07058    0.00908    0.00306   -0.00006
AFIX  43
H31   2    1.287010    0.566241    0.874143    11.00000   -1.20000
AFIX   0
C32   1    1.114347    0.592280    0.874116    11.00000    0.02673    0.03055 =
         0.04327    0.00860    0.00276   -0.00039
AFIX  43
H32   2    1.098147    0.608539    0.816942    11.00000   -1.20000
AFIX   0
C33   1    1.051152    0.576814    0.593223    11.00000    0.02729    0.03821 =
         0.04030   -0.01079    0.01257   -0.00261
C34   1    0.927056    0.587977    0.615813    11.00000    0.02016    0.03074 =
         0.02219   -0.00611    0.00678    0.00171
C35   1    0.843501    0.545761    0.606320    11.00000    0.02635    0.02448 =
         0.03299   -0.00941    0.00730    0.00154
AFIX  43
H35   2    0.863730    0.511195    0.584615    11.00000   -1.20000
AFIX   0
C36   1    0.727734    0.551804    0.627753    11.00000    0.02206    0.02134 =
         0.02025    0.00069    0.00202    0.00040
C37   1    0.640020    0.504515    0.617097    11.00000    0.02670    0.01771 =
         0.02197   -0.00033    0.00299    0.00033
C38   1    0.645024    0.460561    0.561762    11.00000    0.03494    0.02944 =
         0.04784   -0.01509    0.01385   -0.00273
AFIX  43
H38   2    0.707555    0.458978    0.529856    11.00000   -1.20000
AFIX   0
C39   1    0.558612    0.418710    0.552818    11.00000    0.05001    0.02615 =
         0.05565   -0.01940    0.01320   -0.00978
AFIX  43
H39   2    0.563048    0.388530    0.514694    11.00000   -1.20000
AFIX   0
C40   1    0.467563    0.419716    0.597224    11.00000    0.04933    0.02577 =
         0.04191   -0.00117    0.01297   -0.01736
AFIX  43
H40   2    0.408102    0.391025    0.589601    11.00000   -1.20000
AFIX   0
C41   1    0.463379    0.463534    0.653888    11.00000    0.06951    0.04021 =
         0.07675   -0.01219    0.04998   -0.02531
AFIX  43
H41   2    0.402104    0.464469    0.686936    11.00000   -1.20000
AFIX   0
C42   1    0.548547    0.505960    0.662325    11.00000    0.05743    0.02402 =
         0.06025   -0.01177    0.03461   -0.01459
AFIX  43
H42   2    0.543566    0.536393    0.699841    11.00000   -1.20000
AFIX   0
HKLF 4


REM  mo_IALVB118_0m_a.res in P2(1)/n
REM wR2 = 0.0736, GooF = S = 1.144, Restrained GooF = 1.168 for all data
REM R1 = 0.0323 for 5875 Fo > 4sig(Fo) and 0.0356 for all 6318 data
REM 547 parameters refined using 21 restraints

END

WGHT      0.0190     17.7778

REM Highest difference peak  1.250,  deepest hole -1.358,  1-sigma level  0.086
Q1    1   0.5593  0.5487  0.8968  11.00000  0.05    1.25
Q2    1   0.4760  0.6313  0.8581  11.00000  0.05    0.86
Q3    1   0.4459  0.6128  0.8086  11.00000  0.05    0.85
Q4    1   0.6940  0.6862  0.6427  11.00000  0.05    0.68
Q5    1   0.4827  0.5767  0.8379  11.00000  0.05    0.64
Q6    1   0.1759  0.8431  0.6184  11.00000  0.05    0.64
Q7    1   0.0820  0.6573  0.3357  11.00000  0.05    0.59
Q8    1   0.8215  0.6839  0.4650  11.00000  0.05    0.55
Q9    1   0.4985  0.8276  0.7654  11.00000  0.05    0.49
Q10   1   0.5989  0.6175  1.0018  11.00000  0.05    0.46
Q11   1   0.4160  0.4733  0.5938  11.00000  0.05    0.45
Q12   1   0.1936  0.8989  0.6319  11.00000  0.05    0.45
Q13   1   1.0890  0.9263  0.6636  11.00000  0.05    0.44
Q14   1   0.5736  0.6266  0.9881  11.00000  0.05    0.44
Q15   1   0.8294  0.6858  0.7589  11.00000  0.05    0.44
Q16   1   0.6772  0.4372  0.6130  11.00000  0.05    0.41
Q17   1   0.1088  0.7178  0.4770  11.00000  0.05    0.40
Q18   1   0.5360  0.6656  0.9159  11.00000  0.05    0.39
Q19   1   0.1327  0.8114  0.4092  11.00000  0.05    0.38
Q20   1   0.4106  0.8590  0.7967  11.00000  0.05    0.38
;
_shelx_res_checksum   75564

_shelx_hkl_file
;
  -2   0   0  269.17    9.60
  -2   0   0  277.57   10.00
   2   0   0  262.07    9.40
   2   0   0  260.07    9.50
   2   0   0  251.07    9.80
   2   0   0  264.87   10.10
  -2   0   0  266.27    9.40
  -2   0   0  268.07    9.10
  -3   0   0    9.30    3.60
   3   0   0    4.10    4.10
  -3   0   0    7.80    4.00
  -3   0   0    6.50    4.80
   3   0   0    4.70    3.70
   3   0   0    8.60    3.80
  -3   0   0    4.80    3.70
   3   0   0    5.20    4.10
  -3   0   0    3.20    3.80
   4   0   0 1300.07   34.90
   4   0   0 1301.27   35.70
  -4   0   0 1246.28   34.80
  -4   0   0 1302.97   35.20
  -4   0   0 1277.97   34.60
  -4   0   0 1295.77   34.40
   4   0   0 1296.27   34.80
  -4   0   0 1295.57   36.10
   4   0   0 1286.47   35.30
   5   0   0   -4.00    8.10
   5   0   0    2.80    7.80
   5   0   0   -7.50    7.50
  -5   0   0    6.40    7.80
  -5   0   0   -5.30    9.00
  -5   0   0   -5.70    7.20
  -5   0   0    8.30    8.10
  -5   0   0    4.70    7.00
  -5   0   0    4.20    7.50
   5   0   0    1.00    8.60
   6   0   0 2230.78   60.29
  -6   0   0 2242.88   58.59
   6   0   0 2224.68   59.79
  -6   0   0 2212.48   59.19
  -6   0   0 2131.89   60.39
   6   0   0 2178.28   58.89
   6   0   0 2220.98   58.99
  -6   0   0 2172.18   58.89
  -6   0   0 2163.18   59.49
  -6   0   0 2231.38   57.99
  -7   0   0   -0.80    6.70
   7   0   0    3.10    7.70
  -7   0   0    4.70    9.50
  -7   0   0   -0.40    7.40
  -7   0   0   -4.60    6.90
   7   0   0   -4.30    7.30
   7   0   0    8.90    8.70
   7   0   0    5.80    8.10
  -7   0   0    9.10    7.30
  -7   0   0    8.00    8.50
   8   0   0  631.94   25.30
  -8   0   0  631.64   24.00
   8   0   0  607.74   26.80
  -8   0   0  577.14   27.50
  -8   0   0  636.64   23.10
   8   0   0  649.64   25.00
   8   0   0  649.43   27.90
  -8   0   0  638.34   25.20
  -8   0   0  625.34   24.70
  -8   0   0  628.24   26.60
  -9   0   0   -0.30   13.40
   9   0   0   -5.10   12.00
  -9   0   0   -1.20    9.70
  -9   0   0    1.50    9.90
  -9   0   0    8.00   11.10
   9   0   0    3.60   11.40
  -9   0   0   -0.30   11.90
   9   0   0  -17.60   10.00
   9   0   0   -3.10   11.20
  -9   0   0    0.40    8.90
  10   0   0  457.15   29.40
 -10   0   0  438.06   30.50
  10   0   0  414.56   29.70
  10   0   0  480.65   26.10
 -10   0   0  458.05   28.30
 -10   0   0  503.15   26.70
 -10   0   0  485.85   24.40
  10   0   0  438.26   26.60
 -10   0   0  452.95   22.30
 -11   0   0   -6.70   14.90
 -11   0   0    2.10   13.00
 -11   0   0    4.70   12.80
 -11   0   0   11.30   12.80
  11   0   0   13.90   14.10
  11   0   0    4.60   15.20
  11   0   0   13.10   16.30
  11   0   0   -1.70   13.50
 -11   0   0    6.00   13.60
 -11   0   0    0.40   11.40
  12   0   0  375.26   35.30
  12   0   0  396.06   34.10
 -12   0   0  394.16   29.00
 -12   0   0  405.66   25.00
 -12   0   0  361.66   27.60
 -12   0   0  388.36   32.20
  12   0   0  394.46   31.40
  12   0   0  434.06   29.90
 -12   0   0  357.56   29.20
  -1   1   0    2.10    0.60
   1   1   0    0.00    0.80
   2  -1   0  141.69    6.60
  -2  -1   0  124.49    7.30
  -2  -1   0  145.99    8.20
  -2  -1   0  137.89    7.90
   2  -1   0  143.79    6.50
   2  -1   0  144.69    7.40
   2  -1   0  142.79    7.20
  -2  -1   0  131.39    7.50
  -2   1   0  134.99    6.90
  -2   1   0  141.49    6.90
   2   1   0  134.49    8.00
  -2   1   0  144.19    6.50
   2   1   0  136.59    8.40
   2   1   0  141.89    7.50
  -2   1   0  145.29    6.20
   2   1   0  130.99    7.50
  -3  -1   0  627.44   19.30
  -3  -1   0  625.74   17.80
   3  -1   0  597.64   18.00
  -3  -1   0  623.84   18.50
   3  -1   0  608.34   17.40
  -3  -1   0  641.64   18.10
  -3  -1   0  618.54   18.30
   3  -1   0  596.34   17.50
   3  -1   0  601.04   18.10
  -3   1   0  595.04   17.80
  -3   1   0  595.34   17.30
   3   1   0  617.24   18.10
   3   1   0  635.34   18.50
   3   1   0  631.94   18.20
  -3   1   0  588.64   17.60
  -3   1   0  603.14   17.10
   3   1   0  623.94   18.80
  -4  -1   0  156.28    9.30
  -4  -1   0  138.99    9.90
  -4  -1   0  138.49    9.70
   4  -1   0  147.49    9.20
  -4  -1   0  145.69   12.00
   4  -1   0  162.08   10.20
   4  -1   0  150.58    9.20
   4  -1   0  145.79   10.20
  -4  -1   0  131.69   10.40
  -4  -1   0  150.28   10.70
  -4   1   0  160.88   11.20
   4   1   0  145.49   10.60
   4   1   0  150.78    9.80
   4   1   0  144.89    9.70
  -4   1   0  143.19    8.40
  -4   1   0  142.19    9.40
  -4   1   0  145.69    9.30
   4   1   0  152.68   11.10
  -4   1   0  148.69    8.70
  -5  -1   0  263.27   17.10
  -5  -1   0  264.57   15.70
   5  -1   0  268.67   16.40
  -5  -1   0  288.87   16.60
   5  -1   0  250.17   14.70
  -5  -1   0  257.97   14.70
  -5  -1   0  262.27   15.70
  -5  -1   0  250.57   18.80
   5  -1   0  286.67   17.20
   5  -1   0  251.97   15.00
  -5   1   0  246.88   13.40
   5   1   0  275.97   15.90
  -5   1   0  267.57   14.30
   5   1   0  240.98   17.10
   5   1   0  274.27   16.00
  -5   1   0  269.67   15.50
  -5   1   0  274.97   16.20
  -5   1   0  254.37   14.80
   5   1   0  268.27   17.80
  -5   1   0  274.97   18.10
  -6  -1   0  119.49   10.70
  -6  -1   0  121.29   13.50
  -6  -1   0  129.09   12.50
  -6  -1   0  142.99   11.70
   6  -1   0  121.49   10.70
   6  -1   0  122.39   11.20
   6  -1   0  124.39   13.20
  -6  -1   0  120.19   12.90
   6  -1   0  127.99   12.90
  -6  -1   0  127.79   13.80
  -6   1   0  132.39   12.30
   6   1   0  142.89   13.50
  -6   1   0  119.89   10.70
   6   1   0  140.39   15.00
   6   1   0  127.59   10.90
  -6   1   0  127.19   12.70
   6   1   0  128.19   11.80
  -6   1   0  141.09   13.00
  -6   1   0  142.39   16.00
  -6   1   0  135.29   11.60
  -7  -1   0  332.07   17.80
   7  -1   0  311.27   16.90
   7  -1   0  322.97   18.10
   7  -1   0  310.07   18.90
  -7  -1   0  336.07   17.30
  -7  -1   0  312.97   16.90
  -7  -1   0  346.97   19.10
   7  -1   0  327.67   16.70
  -7  -1   0  330.47   20.30
  -7  -1   0  332.57   16.10
   7   1   0  332.17   18.70
  -7   1   0  327.57   19.70
  -7   1   0  325.97   16.40
  -7   1   0  312.77   14.90
   7   1   0  326.67   17.60
  -7   1   0  345.67   16.10
  -7   1   0  313.07   16.60
  -7   1   0  322.57   18.20
   7   1   0  318.27   17.20
   7   1   0  305.07   19.40
  -8  -1   0 1173.28   36.60
  -8  -1   0 1129.19   39.60
  -8  -1   0 1100.69   37.70
   8  -1   0 1146.69   36.10
   8  -1   0 1130.19   37.90
   8  -1   0 1152.18   36.50
   8  -1   0 1149.78   38.50
  -8  -1   0 1166.78   36.10
  -8  -1   0 1129.19   34.90
  -8  -1   0 1137.29   37.00
  -8   1   0 1171.78   38.80
  -8   1   0 1165.18   34.20
  -8   1   0 1107.69   37.00
   8   1   0 1143.19   36.70
   8   1   0 1146.69   38.40
   8   1   0 1158.28   36.70
  -8   1   0 1135.89   35.80
  -8   1   0 1177.58   36.40
   8   1   0 1146.29   39.00
  -8   1   0 1159.88   35.00
  -9  -1   0   65.19   15.00
  -9  -1   0   73.99   12.90
   9  -1   0   68.79   13.10
   9  -1   0   62.29   12.60
  -9  -1   0   79.99   12.30
  -9  -1   0   67.09   11.30
  -9  -1   0   79.79   12.10
   9  -1   0   83.99   14.10
  -9  -1   0   90.49   14.60
   9  -1   0   63.09   11.90
   9   1   0   82.39   13.10
   9   1   0   95.89   13.90
  -9   1   0   72.89   11.20
   9   1   0   86.69   13.60
  -9   1   0   60.79   10.20
   9   1   0   80.39   14.70
  -9   1   0   92.39   14.30
  -9   1   0  107.69   15.10
  -9   1   0   90.99   12.10
  -9   1   0   59.99   11.80
 -10  -1   0  164.08   14.50
  10  -1   0  197.58   18.60
 -10  -1   0  170.78   16.60
  10  -1   0  222.08   21.40
 -10  -1   0  177.88   19.50
 -10  -1   0  165.98   17.30
  10  -1   0  161.08   17.90
 -10  -1   0  183.48   16.00
  10  -1   0  200.58   17.50
  10   1   0  170.98   18.40
  10   1   0  152.68   17.60
  10   1   0  198.38   17.80
 -10   1   0  163.68   18.30
 -10   1   0  175.28   17.50
 -10   1   0  175.88   17.30
 -10   1   0  173.68   19.20
  10   1   0  191.28   16.90
 -11  -1   0   93.19   17.70
  11  -1   0  118.49   19.00
  11  -1   0  103.09   16.90
 -11  -1   0   89.79   15.90
 -11  -1   0   98.29   19.10
 -11  -1   0  105.79   14.40
  11  -1   0   96.59   17.90
  11  -1   0   94.49   16.00
 -11  -1   0   96.59   15.30
  11   1   0  117.89   17.20
  11   1   0  100.69   18.30
 -11   1   0   95.59   15.00
 -11   1   0   78.29   16.20
  11   1   0  122.69   17.00
 -11   1   0  106.89   14.40
 -11   1   0  101.49   12.80
  11   1   0  102.49   18.10
  12  -1   0  401.16   29.00
 -12  -1   0  395.86   29.70
 -12  -1   0  370.66   32.80
 -12  -1   0  373.16   31.00
 -12  -1   0  385.06   26.40
 -12  -1   0  316.47   27.50
  12  -1   0  351.56   34.50
  12  -1   0  437.16   31.30
  12  -1   0  410.86   33.70
  12   1   0  365.66   35.70
  12   1   0  372.96   33.70
 -12   1   0  357.56   23.20
 -12   1   0  372.06   28.90
 -12   1   0  399.66   32.40
  12   1   0  438.96   31.80
 -12   1   0  419.46   26.30
  12   1   0  414.66   29.40
 -12   1   0  352.46   28.00
  -1  -2   0 3249.67   77.29
  -1  -2   0 3195.78   77.39
   1  -2   0 2849.31   76.89
  -1   2   0 3146.69   76.59
   1   2   0 3236.18   77.29
  -2  -2   0 4626.44  114.69
   2  -2   0 4622.24  113.79
  -2  -2   0 4631.24  114.79
  -2  -2   0 4750.72  114.69
   2  -2   0 4505.45  113.79
  -2  -2   0 4779.52  115.09
   2  -2   0 4580.64  113.99
   2  -2   0 4626.14  114.09
  -2   2   0 4776.12  113.59
  -2   2   0 4477.95  113.59
  -2   2   0 4522.95  113.89
   2   2   0 4797.32  115.09
   2   2   0 4688.33  114.69
  -2   2   0 4617.94  113.99
   2   2   0 4675.93  114.69
   2   2   0 4617.44  114.89
  -3  -2   0  557.64   18.20
   3  -2   0  514.45   15.70
   3  -2   0  528.45   16.30
   3  -2   0  523.65   15.60
   3  -2   0  545.15   16.20
  -3  -2   0  557.74   17.10
  -3  -2   0  565.14   16.60
  -3  -2   0  559.64   16.80
  -3  -2   0  557.84   17.40
  -3   2   0  524.65   15.30
  -3   2   0  539.45   15.90
   3   2   0  554.74   16.80
   3   2   0  555.44   17.30
   3   2   0  572.64   17.60
  -3   2   0  557.04   15.90
   3   2   0  557.74   16.80
  -3   2   0  547.65   15.20
  -4  -2   0  581.54   18.70
  -4  -2   0  605.24   21.20
   4  -2   0  599.64   18.90
  -4  -2   0  607.64   19.50
  -4  -2   0  595.94   19.20
   4  -2   0  592.14   18.00
   4  -2   0  584.44   19.00
  -4  -2   0  582.64   19.80
   4  -2   0  582.44   18.10
  -4  -2   0  581.04   19.80
   4   2   0  599.44   19.20
  -4   2   0  584.74   17.60
   4   2   0  583.04   19.20
  -4   2   0  604.94   18.40
  -4   2   0  575.24   18.10
   4   2   0  613.84   20.50
   4   2   0  592.94   20.00
  -4   2   0  597.24   17.40
   5  -2   0 1201.48   34.20
  -5  -2   0 1186.78   35.50
  -5  -2   0 1165.08   37.50
  -5  -2   0 1250.97   34.70
  -5  -2   0 1224.78   35.20
   5  -2   0 1228.88   35.60
  -5  -2   0 1209.38   36.10
  -5  -2   0 1239.28   36.10
   5  -2   0 1147.79   34.90
   5  -2   0 1205.48   34.10
  -5   2   0 1181.08   34.00
  -5   2   0 1145.49   34.70
   5   2   0 1241.58   35.30
   5   2   0 1242.28   35.50
  -5   2   0 1162.08   32.80
   5   2   0 1177.28   36.10
  -5   2   0 1153.68   34.10
   5   2   0 1201.98   36.70
  -5   2   0 1155.58   33.20
   6  -2   0  747.43   24.60
   6  -2   0  769.32   25.90
  -6  -2   0  744.53   25.60
  -6  -2   0  748.83   24.80
   6  -2   0  730.93   24.50
  -6  -2   0  721.73   26.50
  -6  -2   0  745.33   26.30
  -6  -2   0  713.73   25.50
   6  -2   0  749.53   26.20
  -6  -2   0  727.73   28.10
  -6   2   0  781.22   23.80
   6   2   0  723.03   25.70
  -6   2   0  771.42   23.10
   6   2   0  779.42   27.00
  -6   2   0  746.03   26.70
   6   2   0  764.42   27.60
  -6   2   0  751.42   24.70
  -6   2   0  743.63   24.40
  -6   2   0  737.23   25.40
   6   2   0  742.63   25.60
  -7  -2   0 1009.40   32.90
   7  -2   0  988.90   31.50
  -7  -2   0 1009.60   32.40
  -7  -2   0 1021.30   33.60
   7  -2   0 1014.50   32.60
  -7  -2   0 1036.90   31.40
   7  -2   0 1022.90   33.20
   7  -2   0 1010.40   31.50
  -7  -2   0 1000.30   32.10
  -7  -2   0 1033.50   35.10
  -7   2   0 1029.40   31.50
  -7   2   0 1028.70   29.80
   7   2   0 1021.40   34.40
   7   2   0 1019.90   32.50
  -7   2   0  998.10   33.30
   7   2   0 1059.19   34.00
  -7   2   0 1007.00   31.10
   7   2   0 1066.09   32.50
  -7   2   0  993.20   30.20
  -7   2   0 1010.80   32.40
  -8  -2   0  349.77   24.30
  -8  -2   0  365.66   21.20
   8  -2   0  375.66   22.10
   8  -2   0  413.26   21.90
  -8  -2   0  364.66   20.10
  -8  -2   0  407.46   19.20
  -8  -2   0  368.56   20.60
   8  -2   0  417.66   19.60
   8  -2   0  372.36   19.60
  -8  -2   0  338.37   22.20
   8   2   0  360.46   21.00
   8   2   0  399.26   20.70
  -8   2   0  397.16   22.90
  -8   2   0  392.26   21.30
  -8   2   0  392.26   19.50
   8   2   0  397.66   23.40
  -8   2   0  389.96   17.30
   8   2   0  340.87   22.40
  -8   2   0  403.46   19.20
  -8   2   0  401.86   18.10
  -9  -2   0  259.67   25.80
   9  -2   0  229.18   19.90
  -9  -2   0  219.28   18.80
   9  -2   0  232.88   23.10
  -9  -2   0  260.97   20.30
  -9  -2   0  243.98   21.50
  -9  -2   0  256.07   24.00
  -9  -2   0  239.98   18.70
   9  -2   0  278.87   22.50
   9  -2   0  268.47   19.90
  -9   2   0  223.38   21.40
   9   2   0  283.87   24.30
  -9   2   0  255.57   23.30
   9   2   0  269.37   21.50
  -9   2   0  250.77   16.50
  -9   2   0  251.87   18.90
   9   2   0  239.28   23.30
  -9   2   0  229.38   18.20
   9   2   0  257.47   20.80
  -9   2   0  216.48   17.50
 -10  -2   0  106.19   14.60
  10  -2   0   57.39   15.10
 -10  -2   0   99.19   15.90
  10  -2   0   74.69   14.10
 -10  -2   0   98.69   13.30
 -10  -2   0  105.79   15.40
  10  -2   0   86.49   15.80
 -10  -2   0   73.49   17.60
  10  -2   0   86.09   14.20
  10   2   0  100.69   17.00
 -10   2   0  100.69   12.20
  10   2   0   85.89   14.70
 -10   2   0   82.69   14.70
 -10   2   0   91.09   15.80
 -10   2   0   96.59   11.40
  10   2   0   79.19   15.30
  10   2   0  100.59   14.80
 -11  -2   0   72.49   17.80
  11  -2   0   98.59   15.80
 -11  -2   0   66.89   18.30
  11  -2   0   70.29   16.80
  11  -2   0   87.69   17.90
  11  -2   0  112.69   16.60
 -11  -2   0   99.79   16.70
 -11  -2   0  118.79   15.70
 -11  -2   0   76.29   14.00
 -11   2   0   89.49   13.40
  11   2   0  100.09   18.10
  11   2   0   92.29   16.80
  11   2   0  112.59   19.30
 -11   2   0   91.59   14.50
  11   2   0   81.39   16.00
 -11   2   0   90.69   12.10
 -11   2   0   99.19   16.60
 -12  -2   0  142.29   19.60
  12  -2   0  164.08   21.70
 -12  -2   0  146.89   18.50
 -12  -2   0  148.49   18.40
  12  -2   0  190.48   20.10
 -12  -2   0  164.08   21.00
 -12  -2   0  153.08   17.40
  12  -2   0  168.98   18.90
  12  -2   0  174.88   20.90
 -12   2   0  171.28   18.50
  12   2   0  155.38   22.50
  12   2   0  123.89   19.30
  12   2   0  118.99   18.30
 -12   2   0  144.79   18.20
  12   2   0  114.49   21.80
 -12   2   0  150.88   15.90
 -12   2   0  134.69   19.30
   0  -3   0    1.00    1.40
   0  -3   0    2.90    1.50
  -1  -3   0  328.17   10.20
  -1  -3   0  314.57   10.40
  -1  -3   0  323.47   10.70
   1  -3   0  337.27    8.50
  -1  -3   0  325.37   10.20
  -1  -3   0  334.27   10.60
   1  -3   0  330.37    8.50
   1   3   0  329.87   10.60
   1   3   0  320.47   10.50
   1   3   0  326.47   10.10
   1   3   0  327.27   10.20
  -2  -3   0 1240.58   32.40
  -2  -3   0 1216.78   32.90
   2  -3   0 1242.78   30.40
   2  -3   0 1176.98   30.40
  -2  -3   0 1238.08   32.70
   2  -3   0 1182.58   30.80
  -2  -3   0 1225.18   32.10
   2  -3   0 1182.58   30.80
  -2  -3   0 1266.47   32.10
  -2   3   0 1199.58   30.70
   2   3   0 1197.48   32.40
  -2   3   0 1170.58   30.60
   2   3   0 1216.48   32.00
   2   3   0 1253.97   32.10
   2   3   0 1257.97   32.70
  -2   3   0 1146.89   31.00
   3  -3   0  717.53   20.20
   3  -3   0  722.33   19.60
  -3  -3   0  712.03   21.30
  -3  -3   0  722.93   21.50
  -3  -3   0  707.53   20.90
  -3  -3   0  701.13   22.30
   3  -3   0  727.63   20.00
  -3  -3   0  734.53   21.60
  -3  -3   0  727.13   21.20
   3  -3   0  735.13   19.50
  -3   3   0  701.53   19.70
  -3   3   0  742.43   19.00
  -3   3   0  768.32   18.90
   3   3   0  726.83   21.50
   3   3   0  718.43   21.80
  -3   3   0  720.33   19.70
  -3   3   0  711.23   20.40
   3   3   0  697.13   20.90
   3   3   0  745.03   21.10
  -4  -3   0  206.28   12.80
  -4  -3   0  198.28   12.20
  -4  -3   0  191.68   14.30
   4  -3   0  201.78   10.90
  -4  -3   0  198.68   12.90
  -4  -3   0  220.78   11.60
   4  -3   0  196.18    9.70
   4  -3   0  196.08    9.60
   4  -3   0  190.68   10.70
  -4  -3   0  221.48   12.20
  -4   3   0  185.48    9.70
   4   3   0  206.88   11.80
   4   3   0  224.08   12.10
  -4   3   0  200.88    8.50
  -4   3   0  210.38    8.80
  -4   3   0  195.98   10.00
   4   3   0  206.18   13.40
   4   3   0  203.48   12.70
  -5  -3   0   38.90    9.00
  -5  -3   0   22.00    8.00
   5  -3   0   38.80    8.40
  -5  -3   0   33.00    9.30
   5  -3   0   38.80    7.50
  -5  -3   0   53.59   11.00
  -5  -3   0   33.40    9.60
   5  -3   0   39.10    8.70
  -5  -3   0   34.30    8.50
   5  -3   0   37.70    7.40
   5   3   0   41.80    9.30
   5   3   0   38.70    9.30
  -5   3   0   34.70    7.10
  -5   3   0   29.90    6.10
   5   3   0   52.39    9.40
   5   3   0   39.70   10.20
  -5   3   0   42.40    8.10
  -5   3   0   34.30    6.50
   6  -3   0  141.79   12.50
  -6  -3   0  147.19   15.80
  -6  -3   0  125.19   12.70
  -6  -3   0  135.49   15.20
  -6  -3   0  129.49   14.10
   6  -3   0  151.58   11.90
   6  -3   0  151.98   14.00
   6  -3   0  140.49   14.30
  -6  -3   0  152.48   13.30
  -6  -3   0  147.39   14.40
   6   3   0  160.68   16.10
  -6   3   0  156.88   11.10
   6   3   0  150.78   16.90
  -6   3   0  134.29   13.60
  -6   3   0  141.99   12.10
  -6   3   0  138.69   10.20
  -6   3   0  154.08   12.00
   6   3   0  138.29   13.90
   6   3   0  150.98   14.80
   7  -3   0  860.01   27.70
  -7  -3   0  852.31   30.50
  -7  -3   0  860.71   28.80
  -7  -3   0  849.81   27.90
   7  -3   0  870.01   27.70
  -7  -3   0  874.31   32.10
   7  -3   0  842.02   29.10
  -7  -3   0  863.31   29.10
  -7  -3   0  847.02   29.60
   7  -3   0  838.62   28.80
  -7   3   0  831.02   27.10
   7   3   0  856.91   30.90
  -7   3   0  836.02   28.30
  -7   3   0  848.62   27.10
   7   3   0  843.52   29.10
  -7   3   0  864.21   25.50
   7   3   0  866.61   28.90
  -7   3   0  864.81   26.00
   7   3   0  878.51   30.60
  -8  -3   0   74.19   14.20
  -8  -3   0   92.79   12.10
   8  -3   0   91.39   11.10
  -8  -3   0  118.29   13.80
  -8  -3   0  104.29   12.20
   8  -3   0  118.39   12.20
   8  -3   0   95.39   12.40
  -8  -3   0   92.89   11.00
   8  -3   0  131.19   11.60
  -8  -3   0  107.89   12.90
   8   3   0   88.99   13.00
   8   3   0  122.69   13.90
  -8   3   0  116.49   13.10
   8   3   0   89.69   12.40
  -8   3   0  102.69   10.60
  -8   3   0  108.09    9.80
  -8   3   0  129.19   12.30
  -8   3   0  101.89   10.50
   8   3   0   93.09   12.10
  -8   3   0   87.39    9.00
  -9  -3   0  858.41   36.10
  -9  -3   0  870.01   31.70
   9  -3   0  763.42   32.50
  -9  -3   0  816.42   34.10
  -9  -3   0  835.52   30.00
  -9  -3   0  797.92   32.60
   9  -3   0  782.52   33.20
   9  -3   0  807.92   30.50
   9  -3   0  774.72   30.70
  -9   3   0  813.22   27.70
   9   3   0  832.62   35.30
   9   3   0  783.32   34.50
  -9   3   0  807.62   31.60
  -9   3   0  815.62   33.40
   9   3   0  828.42   32.40
  -9   3   0  804.02   26.60
   9   3   0  803.32   31.70
  -9   3   0  799.72   29.60
  10  -3   0   34.10   13.90
 -10  -3   0   14.60   13.10
 -10  -3   0   32.10   16.70
 -10  -3   0    9.00   13.40
 -10  -3   0   26.90   11.80
 -10  -3   0   24.10   14.40
  10  -3   0   13.30   13.30
  10  -3   0   30.10   13.00
  10  -3   0   20.20   12.10
 -10   3   0   10.30    8.60
 -10   3   0   18.10    9.40
  10   3   0   33.20   14.00
  10   3   0    6.40   13.40
 -10   3   0   22.70   10.10
  10   3   0   29.60   13.70
 -10   3   0   15.40   13.00
 -10   3   0   44.80   14.90
  10   3   0   14.30   14.80
 -11  -3   0  810.02   41.30
 -11  -3   0  764.82   37.40
 -11  -3   0  622.24   33.10
  11  -3   0  656.73   33.40
  11  -3   0  741.13   37.10
  11  -3   0  754.92   33.50
  11  -3   0  743.23   36.90
 -11  -3   0  745.53   35.40
 -11  -3   0  725.93   31.30
  11   3   0  742.73   34.30
 -11   3   0  805.52   27.60
 -11   3   0  760.02   32.20
 -11   3   0  791.22   28.80
  11   3   0  777.62   40.40
  11   3   0  780.92   35.90
  11   3   0  695.63   38.50
 -11   3   0  824.82   35.00
 -12  -3   0   26.00   18.30
  12  -3   0   32.90   17.00
 -12  -3   0   16.30   16.10
  12  -3   0   36.10   16.20
  12  -3   0   60.99   18.90
 -12  -3   0   24.80   16.10
 -12  -3   0   32.00   16.10
 -12  -3   0   40.20   16.70
 -12  -3   0   30.90   15.10
  12  -3   0   30.80   17.40
  12   3   0   13.20   17.10
 -12   3   0   46.40   15.10
 -12   3   0   26.50   12.70
 -12   3   0   57.89   15.10
  12   3   0   24.30   18.90
 -12   3   0   21.10   14.60
  12   3   0   57.59   20.00
 -12   3   0    3.70   13.70
  12   3   0   43.60   16.80
 -12   3   0   18.70    8.50
   0  -4   0  918.31   23.50
   0  -4   0  919.91   23.60
   0  -4   0  918.41   23.40
   0  -4   0  912.51   23.60
   0  -4   0  915.41   23.20
   0  -4   0  925.61   23.00
  -1  -4   0 4124.59  103.09
  -1  -4   0 4253.47  103.39
  -1  -4   0 4141.09  103.49
  -1  -4   0 4207.98  102.99
  -1  -4   0 4125.49  103.19
  -1  -4   0 4163.08  103.19
   1   4   0 4188.58  102.99
   1   4   0 4254.77  103.29
   1   4   0 4145.59  102.89
  -2  -4   0 1801.32   45.90
  -2  -4   0 1789.52   46.10
  -2  -4   0 1816.72   45.90
   2  -4   0 1735.93   44.10
  -2  -4   0 1766.42   45.60
  -2  -4   0 1729.63   46.40
  -2  -4   0 1806.42   45.60
   2  -4   0 1715.33   44.10
   2   4   0 1794.82   46.10
  -2   4   0 1679.93   44.00
   2   4   0 1783.62   45.50
   2   4   0 1783.92   45.90
  -2   4   0 1771.32   43.90
  -2   4   0 1806.42   43.90
   2   4   0 1801.52   45.60
   3  -4   0  729.23   20.20
  -3  -4   0  744.63   22.10
  -3  -4   0  728.03   22.90
   3  -4   0  725.83   20.10
   3  -4   0  708.43   19.50
   3  -4   0  723.83   19.50
  -3  -4   0  757.52   22.30
  -3  -4   0  762.22   21.70
  -3  -4   0  767.22   21.60
  -3  -4   0  750.22   21.90
  -3   4   0  734.73   19.80
   3   4   0  733.53   22.40
  -3   4   0  721.73   20.20
   3   4   0  722.63   21.50
   3   4   0  716.73   22.00
   3   4   0  750.62   21.50
  -3   4   0  736.53   19.70
   4  -4   0   65.29    5.70
   4  -4   0   57.89    5.40
   4  -4   0   64.49    6.40
  -4  -4   0   54.79    7.60
  -4  -4   0   56.19    7.90
  -4  -4   0   66.29    8.60
  -4  -4   0   66.59    8.00
  -4  -4   0   58.49    9.20
  -4  -4   0   65.89    7.90
   4  -4   0   58.89    6.50
   4   4   0   67.19    8.10
  -4   4   0   53.89    6.20
  -4   4   0   56.49    5.60
  -4   4   0   53.39    5.50
  -4   4   0   59.69    5.90
   4   4   0   68.39    8.50
  -4   4   0   48.80    5.60
   4   4   0   53.69    8.40
   4   4   0   63.19    7.60
  -4   4   0   59.79    6.80
  -5  -4   0 3591.84   91.49
  -5  -4   0 3622.44   90.49
  -5  -4   0 3567.44   90.99
   5  -4   0 3477.55   89.69
  -5  -4   0 3535.45   90.69
   5  -4   0 3541.45   88.89
  -5  -4   0 3549.04   91.29
   5  -4   0 3495.95   89.59
  -5  -4   0 3512.15   92.39
   5  -4   0 3465.45   88.79
  -5   4   0 3307.57   90.09
   5   4   0 3609.24   91.99
  -5   4   0 3366.86   89.09
   5   4   0 3607.74   91.59
   5   4   0 3523.05   90.69
   5   4   0 3547.34   90.59
  -5   4   0 3460.85   88.79
  -5   4   0 3549.34   87.69
  -5   4   0 3564.74   87.49
  -5   4   0 3456.25   88.89
   6  -4   0   11.70    7.60
   6  -4   0   12.90    8.00
   6  -4   0   22.90    7.00
  -6  -4   0   29.60    8.40
  -6  -4   0   24.60   10.70
  -6  -4   0   22.30    8.30
  -6  -4   0   27.80    8.30
  -6  -4   0   15.20    8.80
   6  -4   0   22.40    7.00
  -6  -4   0   33.20    9.50
   6   4   0   36.30    8.90
  -6   4   0   19.20    5.80
  -6   4   0    8.50    5.10
  -6   4   0   14.20    7.40
   6   4   0   21.10    9.90
   6   4   0   22.70    9.20
  -6   4   0   19.60    6.40
  -6   4   0   15.70    6.40
   6   4   0   19.40    7.80
   7  -4   0 1418.76   41.30
  -7  -4   0 1431.76   42.50
  -7  -4   0 1414.76   41.80
  -7  -4   0 1449.15   41.00
   7  -4   0 1380.36   39.70
  -7  -4   0 1369.76   44.20
  -7  -4   0 1374.46   41.60
  -7  -4   0 1338.97   42.50
   7  -4   0 1406.96   40.90
   7  -4   0 1435.06   40.00
   7   4   0 1388.76   43.00
  -7   4   0 1364.36   39.50
   7   4   0 1385.06   43.30
  -7   4   0 1337.27   40.10
  -7   4   0 1410.16   38.00
   7   4   0 1371.66   41.70
  -7   4   0 1430.86   37.60
  -7   4   0 1414.16   39.40
   7   4   0 1386.66   41.30
  -8  -4   0   -1.60    9.10
  -8  -4   0    2.30   10.00
   8  -4   0  -10.50    8.20
   8  -4   0    4.50    8.60
   8  -4   0    3.00    9.10
  -8  -4   0    4.20   11.00
  -8  -4   0   15.40   12.70
  -8  -4   0    5.60   10.00
   8  -4   0    1.90    9.80
  -8  -4   0    0.60    9.70
   8   4   0    4.30   10.10
  -8   4   0   15.50    8.30
  -8   4   0   11.80    6.60
   8   4   0    9.00   10.30
  -8   4   0    6.80    7.30
  -8   4   0    5.90    9.40
   8   4   0    1.10   11.00
  -8   4   0   -2.40    7.80
   8   4   0   10.90    9.40
   9  -4   0 1699.83   51.39
  -9  -4   0 1822.12   52.89
   9  -4   0 1750.42   53.29
  -9  -4   0 1749.62   56.89
  -9  -4   0 1767.62   54.89
  -9  -4   0 1832.62   52.19
   9  -4   0 1713.63   53.79
  -9  -4   0 1848.02   54.59
   9  -4   0 1726.33   51.39
  -9  -4   0 1554.34   52.29
   9   4   0 1798.82   56.19
   9   4   0 1824.32   53.69
   9   4   0 1799.42   55.79
  -9   4   0 1761.62   50.59
  -9   4   0 1798.52   47.80
  -9   4   0 1744.33   50.59
  -9   4   0 1795.32   48.40
   9   4   0 1655.63   52.69
  -9   4   0 1764.32   52.09
 -10  -4   0  169.48   20.80
  10  -4   0  180.88   16.00
 -10  -4   0  175.88   17.50
  10  -4   0  153.88   17.00
 -10  -4   0  168.68   16.00
 -10  -4   0  134.29   17.10
 -10  -4   0  149.59   17.30
  10  -4   0  150.68   17.50
  10  -4   0  202.38   16.30
 -10   4   0  187.38   16.40
  10   4   0  170.48   19.50
 -10   4   0  171.18   14.90
  10   4   0  169.48   18.60
 -10   4   0  177.38   16.50
  10   4   0  151.98   17.50
  11  -4   0  514.25   32.10
  11  -4   0  449.06   31.30
 -11  -4   0  556.04   33.90
 -11  -4   0  484.15   27.80
 -11  -4   0  478.75   36.10
  11  -4   0  486.85   28.60
  11  -4   0  487.95   27.90
 -11  -4   0  444.26   29.20
 -11  -4   0  486.55   30.90
 -11   4   0  470.75   22.20
 -11   4   0  487.45   27.00
 -11   4   0  507.95   29.50
  11   4   0  464.35   29.10
  11   4   0  484.15   33.50
  11   4   0  461.05   30.30
  11   4   0  468.95   35.80
  12  -4   0   -2.00   17.50
  12  -4   0  -19.90   13.80
 -12  -4   0   16.40   17.40
 -12  -4   0  -14.50   15.80
 -12  -4   0  -22.20   12.20
 -12  -4   0   33.30   17.00
 -12  -4   0  -14.20   16.70
 -12  -4   0   12.90   19.20
  12  -4   0   33.60   16.60
  12  -4   0   13.10   16.60
 -12   4   0  -15.70   14.10
 -12   4   0    1.70   14.60
 -12   4   0  -11.20   10.50
 -12   4   0   -0.30    7.70
  12   4   0   10.20   15.40
 -12   4   0  -15.80   12.00
  12   4   0   -1.20   19.40
  12   4   0   17.20   19.70
  12   4   0  -19.10   16.40
 -12   4   0   -2.00   13.40
   0  -5   0    9.70    2.50
   0  -5   0    5.40    3.40
   0  -5   0    7.60    3.20
   0  -5   0   11.20    3.30
   0  -5   0   10.20    3.00
   0  -5   0   15.80    3.40
  -1  -5   0 1889.61   48.00
  -1  -5   0 1854.61   48.20
  -1  -5   0 1852.21   48.10
  -1  -5   0 1902.61   48.60
  -1  -5   0 1873.11   47.90
  -1  -5   0 1946.51   48.50
   1   5   0 1914.11   48.30
   1   5   0 1903.41   47.90
   1   5   0 1914.41   47.70
  -2  -5   0  453.45   15.10
   2  -5   0  435.26   12.00
  -2  -5   0  439.86   14.30
  -2  -5   0  459.85   15.60
  -2  -5   0  440.16   14.30
  -2  -5   0  442.56   14.80
  -2  -5   0  439.76   14.70
   2  -5   0  423.86   11.90
   2   5   0  431.76   14.80
   2   5   0  429.36   14.00
   2   5   0  456.15   14.30
  -2   5   0  454.05   11.60
   2   5   0  447.16   15.10
  -3  -5   0   73.49    7.50
   3  -5   0   79.69    4.70
   3  -5   0   87.89    4.70
   3  -5   0   77.09    5.90
  -3  -5   0   68.89    6.30
  -3  -5   0   70.39    6.40
  -3  -5   0   84.79    8.90
  -3  -5   0   68.19    6.60
   3  -5   0   78.09    5.70
  -3  -5   0   86.49    8.50
   3   5   0   84.49    7.50
   3   5   0   79.59    7.90
  -3   5   0   80.69    5.20
   3   5   0   85.99    9.30
   3   5   0   85.89    8.50
  -3   5   0   86.29    6.00
  -3   5   0   81.79    5.10
  -4  -5   0    3.40    7.10
  -4  -5   0   -7.90    7.50
  -4  -5   0   -2.60    9.00
  -4  -5   0    2.00    7.40
   4  -5   0    1.70    5.50
  -4  -5   0    7.60    7.50
   4  -5   0    5.10    5.60
  -4  -5   0   -5.30    7.50
   4  -5   0    0.80    4.60
   4  -5   0   -4.30    4.70
  -4   5   0   -1.40    2.40
   4   5   0   -1.50    7.40
  -4   5   0    4.10    4.90
  -4   5   0    2.40    5.90
  -4   5   0    0.20    4.60
   4   5   0    6.80    7.00
   4   5   0    2.80    6.80
   4   5   0    3.90    8.10
  -5  -5   0 2096.09   57.89
   5  -5   0 2044.10   54.59
  -5  -5   0 2107.29   57.69
  -5  -5   0 2223.18   57.19
   5  -5   0 2044.10   55.69
   5  -5   0 2058.99   55.49
  -5  -5   0 2139.49   58.19
  -5  -5   0 2117.19   57.39
  -5  -5   0 2180.48   59.49
   5  -5   0 2058.69   54.79
  -5   5   0 2077.29   54.69
  -5   5   0 2122.69   52.69
  -5   5   0 2165.28   52.69
  -5   5   0 2016.20   55.09
  -5   5   0 2058.29   55.59
  -5   5   0 2098.99   54.69
   5   5   0 2134.19   57.29
   5   5   0 2199.28   58.39
   5   5   0 2154.08   57.19
   5   5   0 2141.99   58.69
  -6  -5   0  845.92   29.10
  -6  -5   0  840.32   28.10
   6  -5   0  789.32   25.00
   6  -5   0  806.62   25.30
  -6  -5   0  824.02   29.00
  -6  -5   0  843.42   28.10
  -6  -5   0  869.41   27.50
   6  -5   0  826.52   26.80
  -6  -5   0  811.92   30.60
   6  -5   0  811.82   26.40
   6   5   0  839.92   29.80
  -6   5   0  792.62   25.00
  -6   5   0  829.62   22.80
  -6   5   0  790.92   25.80
   6   5   0  833.12   27.90
  -6   5   0  837.02   22.60
  -6   5   0  787.82   26.30
  -6   5   0  796.82   24.80
   6   5   0  858.21   27.80
   6   5   0  847.02   29.40
  -7  -5   0  345.17   19.00
   7  -5   0  347.17   18.00
  -7  -5   0  350.16   19.00
  -7  -5   0  371.56   22.90
  -7  -5   0  367.16   20.80
   7  -5   0  351.56   16.40
   7  -5   0  333.17   17.50
   7  -5   0  323.37   16.30
  -7  -5   0  331.87   19.70
  -7  -5   0  355.16   18.00
  -7   5   0  347.27   17.10
  -7   5   0  345.97   12.70
   7   5   0  366.06   18.40
  -7   5   0  332.57   15.80
  -7   5   0  343.67   17.80
   7   5   0  366.16   21.10
   7   5   0  350.16   19.00
  -7   5   0  348.07   15.70
  -7   5   0  353.06   13.30
   7   5   0  352.76   21.60
   8  -5   0  236.48   16.60
   8  -5   0  208.48   18.50
  -8  -5   0  216.68   21.50
  -8  -5   0  247.38   20.10
  -8  -5   0  259.37   19.60
  -8  -5   0  229.38   24.00
   8  -5   0  247.98   16.40
  -8  -5   0  223.68   19.70
  -8  -5   0  242.88   18.10
   8  -5   0  194.98   18.00
   8   5   0  245.38   18.70
  -8   5   0  221.38   17.90
  -8   5   0  211.28   15.40
  -8   5   0  207.28   12.60
  -8   5   0  203.58   11.60
  -8   5   0  206.68   15.40
   8   5   0  232.98   21.40
  -8   5   0  188.98   17.20
   8   5   0  222.28   22.00
   8   5   0  225.08   19.20
  -9  -5   0  783.52   33.00
  -9  -5   0  749.62   29.90
  -9  -5   0  718.93   33.40
   9  -5   0  802.02   29.30
   9  -5   0  770.12   29.20
   9  -5   0  740.13   30.90
  -9  -5   0  763.22   31.60
  -9  -5   0  771.32   36.20
   9  -5   0  765.62   31.60
  -9  -5   0  726.73   31.50
  -9   5   0  650.73   36.80
   9   5   0  750.62   34.80
  -9   5   0  747.53   23.50
   9   5   0  787.42   32.20
  -9   5   0  745.13   27.70
  -9   5   0  757.62   29.60
  -9   5   0  713.83   27.70
  -9   5   0  772.42   24.40
   9   5   0  748.33   34.00
  10  -5   0  274.27   22.80
 -10  -5   0  421.76   29.30
 -10  -5   0  414.56   24.20
 -10  -5   0  384.76   28.00
  10  -5   0  363.36   24.00
  10  -5   0  369.66   26.60
 -10  -5   0  361.86   31.90
  10  -5   0  343.27   26.40
 -10  -5   0  428.86   26.30
  10   5   0  393.06   27.20
  10   5   0  387.06   29.80
  10   5   0  398.46   31.30
 -10   5   0  363.06   16.40
 -10   5   0  374.06   24.90
 -10   5   0  386.66   17.80
 -11  -5   0  232.38   24.40
  11  -5   0  197.98   20.50
  11  -5   0  222.28   20.10
 -11  -5   0  214.98   23.10
 -11  -5   0  244.88   27.90
 -11  -5   0  251.37   26.90
 -11  -5   0  256.87   27.90
 -11  -5   0  253.17   23.10
  11  -5   0  246.18   24.80
  11  -5   0  215.38   23.20
  11   5   0  227.68   22.20
  11   5   0  228.38   20.60
 -11   5   0  182.18   19.90
 -11   5   0  247.58   20.00
 -11   5   0  240.68   16.30
  11   5   0  174.88   22.60
  12  -5   0  173.68   21.10
 -12  -5   0  121.39   19.50
 -12  -5   0  121.19   21.30
  12  -5   0  145.09   21.20
 -12  -5   0  128.29   19.50
  12  -5   0  140.29   19.10
  12  -5   0  119.19   17.30
 -12  -5   0  142.99   20.60
  12   5   0  136.19   22.60
  12   5   0  135.59   23.90
 -12   5   0  119.29   16.70
  12   5   0  153.68   21.00
  12   5   0  104.79   18.90
 -12   5   0  127.79   16.90
   0  -6   0  291.97    9.80
   0  -6   0  269.57    9.20
   0  -6   0  271.27    8.30
   0  -6   0  293.07    9.80
   0  -6   0  250.77    8.80
   0  -6   0  264.87    9.40
  -1  -6   0   25.20    4.00
  -1  -6   0   19.60    4.50
   1  -6   0   14.30    2.50
  -1  -6   0   15.50    4.00
  -1  -6   0   19.40    4.10
  -1  -6   0   16.50    4.70
   1  -6   0   20.50    2.30
  -1  -6   0   20.50    4.30
   1   6   0   19.50    3.80
   1   6   0   17.20    4.40
   1   6   0   11.00    3.20
  -2  -6   0 1523.35   40.10
  -2  -6   0 1468.15   40.10
   2  -6   0 1495.85   37.80
  -2  -6   0 1537.75   40.80
  -2  -6   0 1513.15   39.90
  -2  -6   0 1508.85   40.40
  -2  -6   0 1535.95   39.90
   2   6   0 1525.85   39.60
   2   6   0 1581.04   40.60
   2   6   0 1528.15   40.30
   2   6   0 1524.85   39.80
  -3  -6   0  785.82   24.60
   3  -6   0  697.03   19.40
   3  -6   0  735.33   20.40
  -3  -6   0  780.32   23.40
  -3  -6   0  749.53   23.40
  -3  -6   0  781.12   22.90
   3  -6   0  734.53   20.30
  -3  -6   0  748.73   22.90
  -3  -6   0  783.32   23.90
   3  -6   0  793.42   19.40
   3   6   0  790.02   24.00
   3   6   0  775.62   23.00
   3   6   0  740.53   22.50
  -3   6   0  710.43   20.00
  -3   6   0  768.52   19.90
  -3   6   0  720.53   20.10
  -3   6   0  789.22   19.80
   3   6   0  761.92   23.60
  -4  -6   0 1811.02   47.80
  -4  -6   0 1793.52   49.80
  -4  -6   0 1728.43   48.30
   4  -6   0 1676.23   45.10
  -4  -6   0 1773.62   47.90
   4  -6   0 1701.33   45.40
  -4  -6   0 1781.12   48.80
   4  -6   0 1714.33   44.40
   4  -6   0 1638.64   44.40
  -4  -6   0 1768.72   48.30
  -4   6   0 1664.83   45.10
   4   6   0 1792.62   47.50
   4   6   0 1740.73   48.60
  -4   6   0 1740.43   44.60
   4   6   0 1750.82   47.70
   4   6   0 1784.92   49.10
  -4   6   0 1687.23   44.50
   5  -6   0 1737.83   46.00
  -5  -6   0 1716.43   48.90
   5  -6   0 1786.22   47.00
   5  -6   0 1754.82   46.70
  -5  -6   0 1694.33   49.60
   5  -6   0 1752.52   45.80
  -5  -6   0 1727.03   49.90
  -5  -6   0 1825.22   51.39
  -5  -6   0 1756.32   48.70
  -5  -6   0 1756.62   49.30
   5   6   0 1862.61   50.59
   5   6   0 1703.53   48.70
   5   6   0 1740.33   49.99
  -5   6   0 1755.82   45.80
  -5   6   0 1710.83   46.60
  -5   6   0 1756.02   45.80
   5   6   0 1758.62   48.60
   6  -6   0  839.32   25.70
  -6  -6   0  854.41   29.20
  -6  -6   0  880.41   30.30
  -6  -6   0  864.91   29.10
  -6  -6   0  891.81   28.70
  -6  -6   0  884.31   30.20
   6  -6   0  881.31   26.00
  -6  -6   0  842.52   31.60
   6  -6   0  884.21   27.10
   6  -6   0  868.91   27.30
   6   6   0  933.71   28.70
   6   6   0  881.21   30.70
  -6   6   0  825.02   25.40
   6   6   0  850.01   30.50
   6   6   0  855.81   29.00
  -6   6   0  857.21   25.50
  -6   6   0  810.82   26.60
  -6   6   0  841.62   26.20
   7  -6   0  313.17   15.20
  -7  -6   0  300.37   20.30
  -7  -6   0  278.17   22.10
   7  -6   0  318.37   17.40
   7  -6   0  299.37   17.00
  -7  -6   0  324.27   17.80
  -7  -6   0  280.77   18.50
  -7  -6   0  308.87   18.80
  -7  -6   0  302.97   19.70
   7  -6   0  321.37   15.60
   7   6   0  306.37   21.20
  -7   6   0  298.97   14.50
  -7   6   0  291.67   16.40
   7   6   0  310.77   20.50
   7   6   0  291.17   18.90
  -7   6   0  320.07   14.70
  -7   6   0  291.87   15.90
   7   6   0  310.17   17.90
  -8  -6   0  423.16   23.70
  -8  -6   0  464.15   27.90
  -8  -6   0  454.55   24.50
  -8  -6   0  435.06   25.10
   8  -6   0  411.26   20.00
  -8  -6   0  436.76   22.30
   8  -6   0  402.86   19.40
  -8  -6   0  437.56   23.60
   8  -6   0  406.76   21.20
   8  -6   0  421.06   21.80
  -8   6   0  419.66   18.70
  -8   6   0  377.56   20.10
  -8   6   0  386.96   14.10
   8   6   0  438.06   23.40
  -8   6   0  370.46   20.20
   8   6   0  427.26   25.30
   8   6   0  464.75   26.70
  -8   6   0  378.76   13.50
   8   6   0  464.05   22.30
  -8   6   0  423.76   18.70
   9  -6   0 1072.49   35.20
   9  -6   0 1049.70   37.10
  -9  -6   0 1020.80   39.70
   9  -6   0 1078.19   35.50
  -9  -6   0 1051.19   38.50
  -9  -6   0 1039.60   39.10
  -9  -6   0 1034.90   38.20
   9  -6   0 1105.89   37.90
  -9  -6   0  992.70   42.10
  -9  -6   0 1064.39   36.80
  -9   6   0 1033.10   35.10
   9   6   0  980.50   40.20
  -9   6   0 1058.89   28.70
   9   6   0 1025.50   41.20
  -9   6   0 1020.20   35.70
  -9   6   0 1093.89   29.20
   9   6   0 1028.60   38.10
  -9   6   0 1097.29   34.40
  -9   6   0 1057.29   34.00
  10  -6   0  177.58   17.30
 -10  -6   0  199.28   22.60
 -10  -6   0  240.38   23.80
 -10  -6   0  162.78   17.20
 -10  -6   0  171.58   17.00
  10  -6   0  187.08   15.70
 -10  -6   0  210.58   20.10
  10  -6   0  200.78   17.90
  10  -6   0  169.98   15.90
 -10  -6   0  168.38   18.30
 -10   6   0  179.88   20.50
  10   6   0  189.98   20.80
 -10   6   0  199.98   11.80
  10   6   0  184.38   19.40
 -10   6   0  163.18   15.50
 -10   6   0  174.48   10.50
  10   6   0  223.28   19.90
 -10   6   0  162.08   16.60
 -11  -6   0  105.89   17.90
  11  -6   0  143.09   17.90
  11  -6   0  111.69   15.70
 -11  -6   0  125.49   22.10
  11  -6   0  136.79   16.70
 -11  -6   0  113.69   20.10
 -11  -6   0  103.39   18.20
  11  -6   0  129.99   17.90
 -11  -6   0  113.99   18.20
  11   6   0   90.49   20.10
  11   6   0  133.89   21.10
 -11   6   0   97.79   13.50
  11   6   0  147.49   19.30
  12  -6   0   85.89   18.30
 -12  -6   0   93.49   20.20
  12  -6   0   81.29   16.50
 -12  -6   0   91.29   22.20
  12  -6   0  102.49   17.80
 -12  -6   0  108.39   20.10
 -12  -6   0   35.90   20.90
 -12  -6   0   81.19   18.90
 -12  -6   0  100.09   19.50
 -12   6   0   65.79   14.90
  12   6   0   77.09   19.60
  12   6   0  113.89   18.90
  12   6   0   93.49   20.30
  12   6   0   79.79   21.90
 -12   6   0   79.59   15.20
   0  -7   0    3.60    3.00
   0  -7   0    6.20    3.20
   0  -7   0    7.50    2.50
   0  -7   0    6.20    3.40
   0  -7   0    5.40    2.80
   0  -7   0    7.00    3.50
  -1  -7   0    6.30    3.70
   1  -7   0    6.30    2.50
  -1  -7   0    8.30    3.60
  -1  -7   0    2.90    4.30
   1  -7   0    6.80    2.20
  -1  -7   0    2.80    4.10
  -1  -7   0    7.60    3.70
  -1  -7   0    6.10    3.80
   1   7   0    5.00    3.00
   1   7   0    4.70    3.40
  -2  -7   0  233.08   10.20
  -2  -7   0  213.98   10.20
  -2  -7   0  213.28   10.70
  -2  -7   0  235.28   11.80
  -2  -7   0  217.08   10.70
  -2  -7   0  218.58   11.00
   2   7   0  211.18   10.80
   2   7   0  209.98    9.50
   2   7   0  217.48   10.10
   2   7   0  210.28   11.20
   3  -7   0  474.95   14.70
  -3  -7   0  519.85   18.40
   3  -7   0  476.55   14.50
  -3  -7   0  519.85   18.90
  -3  -7   0  516.75   20.30
  -3  -7   0  506.05   18.30
  -3  -7   0  517.95   19.40
  -3  -7   0  521.95   18.90
   3   7   0  539.65   19.50
   3   7   0  520.75   17.80
   3   7   0  526.15   18.40
   3   7   0  528.65   19.80
  -4  -7   0 1603.64   43.40
  -4  -7   0 1586.54   43.70
   4  -7   0 1443.46   39.20
  -4  -7   0 1589.24   44.60
  -4  -7   0 1566.34   44.00
   4  -7   0 1457.85   40.30
   4  -7   0 1465.65   40.10
  -4  -7   0 1611.64   45.80
  -4  -7   0 1548.84   44.00
   4  -7   0 1523.45   39.20
  -4   7   0 1467.85   39.70
   4   7   0 1529.55   42.70
   4   7   0 1600.54   43.40
  -4   7   0 1551.74   39.30
  -4   7   0 1358.36   39.80
  -4   7   0 1526.85   39.40
   4   7   0 1589.04   44.40
   4   7   0 1591.74   44.70
  -5  -7   0  809.92   27.80
  -5  -7   0  841.32   29.00
   5  -7   0  817.82   24.60
   5  -7   0  811.52   24.90
   5  -7   0  787.62   23.50
   5  -7   0  792.32   23.40
  -5  -7   0  795.02   28.00
  -5  -7   0  821.02   28.70
  -5  -7   0  834.72   27.60
  -5  -7   0  818.72   30.40
   5   7   0  812.72   27.50
  -5   7   0  800.92   24.30
  -5   7   0  817.62   23.30
  -5   7   0  824.42   23.40
   5   7   0  829.12   28.90
   5   7   0  825.02   27.10
   5   7   0  857.71   29.60
  -6  -7   0  270.07   16.60
  -6  -7   0  313.67   20.90
   6  -7   0  262.17   14.30
   6  -7   0  273.87   13.00
   6  -7   0  262.77   14.70
   6  -7   0  272.17   12.90
  -6  -7   0  255.27   17.20
  -6  -7   0  297.27   18.70
  -6  -7   0  277.17   18.60
  -6  -7   0  278.27   16.90
  -6   7   0  273.07   12.40
  -6   7   0  273.07   13.90
   6   7   0  308.57   16.30
   6   7   0  300.87   19.40
  -6   7   0  260.77   12.90
   6   7   0  289.97   17.00
  -6   7   0  275.17   12.50
   6   7   0  298.67   18.70
  -7  -7   0  120.69   14.20
   7  -7   0  124.99   11.90
  -7  -7   0  149.69   15.50
  -7  -7   0  105.29   11.70
  -7  -7   0  138.89   12.80
   7  -7   0  130.69   10.90
   7  -7   0  105.59   11.80
   7  -7   0  129.79   10.70
  -7  -7   0  146.29   13.90
  -7  -7   0  132.39   13.30
  -7   7   0  101.69   11.00
  -7   7   0  121.89   12.80
   7   7   0  131.49   12.10
  -7   7   0  114.69   12.90
   7   7   0  135.79   13.50
   7   7   0  148.79   13.40
  -7   7   0  107.79   11.20
   7   7   0  142.29   14.30
   8  -7   0  349.67   18.50
   8  -7   0  325.37   20.40
  -8  -7   0  352.36   24.40
  -8  -7   0  384.26   21.50
  -8  -7   0  356.56   22.90
  -8  -7   0  334.87   23.50
   8  -7   0  359.86   20.00
  -8  -7   0  356.86   22.60
  -8  -7   0  354.46   27.10
   8  -7   0  358.66   18.10
   8   7   0  352.46   24.50
  -8   7   0  336.07   17.00
   8   7   0  349.27   22.40
  -8   7   0  347.97   19.10
  -8   7   0  318.07   18.50
   8   7   0  335.17   21.50
  -8   7   0  341.17   17.00
   8   7   0  368.46   25.60
   9  -7   0   33.80   11.90
  -9  -7   0    8.90   13.10
  -9  -7   0   24.80   13.70
  -9  -7   0    5.80   13.50
   9  -7   0   19.80   12.10
   9  -7   0   16.10   10.20
   9  -7   0   29.90   11.10
  -9  -7   0   27.10   13.50
  -9  -7   0   19.00   12.30
  -9  -7   0   66.99   17.20
  -9   7   0    4.20    9.30
   9   7   0   31.70   14.50
  -9   7   0   21.00    9.50
   9   7   0   27.10   14.40
   9   7   0   40.80   13.30
  -9   7   0   22.10   10.30
  -9   7   0   27.20   10.90
  10  -7   0  753.62   33.90
 -10  -7   0  857.61   38.00
  10  -7   0  807.82   31.20
  10  -7   0  780.12   34.00
 -10  -7   0  884.91   35.80
 -10  -7   0  884.91   38.10
 -10  -7   0  828.02   33.20
 -10  -7   0  827.02   36.00
  10  -7   0  794.42   31.60
 -10  -7   0  838.22   41.50
  10   7   0  830.72   38.60
  10   7   0  819.32   39.70
 -10   7   0  804.92   31.50
 -10   7   0  670.73   28.20
  10   7   0  771.52   35.00
 -11  -7   0  144.19   23.30
 -11  -7   0  120.59   20.20
  11  -7   0  111.59   16.40
  11  -7   0  149.99   18.10
 -11  -7   0  127.39   19.10
  11  -7   0  150.18   16.50
  11  -7   0  135.09   17.60
 -11  -7   0  125.49   19.40
 -11  -7   0   99.39   17.60
  11   7   0  160.58   22.10
  11   7   0  117.79   19.00
 -11   7   0  128.49   14.30
  11   7   0   83.09   20.70
   0  -8   0 4159.18  103.29
   0  -8   0 4245.38  103.29
   0  -8   0 4147.08  102.79
   0  -8   0 4178.48  102.99
   0  -8   0 4178.08  102.59
   0  -8   0 4106.99  103.09
  -1  -8   0  547.25   17.50
   1  -8   0  534.05   14.80
  -1  -8   0  539.65   16.80
  -1  -8   0  549.35   16.90
  -1  -8   0  543.95   17.20
  -1  -8   0  548.35   16.30
   1  -8   0  531.25   15.10
  -1  -8   0  556.44   16.60
   1   8   0  571.34   16.20
   1   8   0  564.94   15.70
  -2  -8   0 2858.51   73.29
  -2  -8   0 2863.01   73.99
  -2  -8   0 2878.11   73.09
  -2  -8   0 2854.91   73.29
  -2  -8   0 2872.91   73.59
  -2  -8   0 2819.12   72.99
   2   8   0 2883.51   73.59
   2   8   0 2932.01   73.69
   2   8   0 2884.11   72.49
   2   8   0 2874.21   72.89
   3  -8   0  256.57    9.50
   3  -8   0  247.48    9.20
  -3  -8   0  254.57   15.70
  -3  -8   0  248.58   15.70
  -3  -8   0  264.57   15.00
  -3  -8   0  244.58   14.70
  -3  -8   0  271.37   16.40
  -3  -8   0  260.07   17.70
   3   8   0  260.87   16.60
   3   8   0  260.27   14.20
   3   8   0  241.58   14.70
   3   8   0  260.67   16.10
  -4  -8   0 5567.34  134.59
   4  -8   0 5075.99  131.49
  -4  -8   0 5497.15  136.19
   4  -8   0 5170.28  131.69
  -4  -8   0 5322.97  134.89
   4  -8   0 4980.00  130.79
  -4  -8   0 5363.46  134.69
  -4  -8   0 5356.66  134.99
  -4  -8   0 5541.05  135.49
   4  -8   0 5297.47  130.89
   4   8   0 5430.06  134.39
   4   8   0 5533.45  135.49
  -4   8   0 5479.55  130.99
  -4   8   0 5017.00  130.99
  -4   8   0 5170.48  130.89
   4   8   0 5424.46  134.19
   4   8   0 5420.06  135.19
   5  -8   0    2.70    4.60
  -5  -8   0   -0.80    7.90
  -5  -8   0    2.30    8.40
  -5  -8   0   -2.30    9.40
   5  -8   0    1.60    4.80
  -5  -8   0    8.30    8.60
  -5  -8   0   12.70    8.80
   5  -8   0    2.00    5.80
  -5  -8   0    1.90    8.10
   5  -8   0    3.70    5.80
   5   8   0   -3.60    8.10
  -5   8   0    0.10    5.20
  -5   8   0    2.40    5.20
   5   8   0   -4.90    9.00
  -5   8   0    4.90    4.70
  -5   8   0    1.00    4.30
   5   8   0    5.10    9.20
   5   8   0   -3.00    7.40
  -6  -8   0 1570.24   45.60
  -6  -8   0 1590.74   48.30
   6  -8   0 1537.05   41.90
   6  -8   0 1555.04   42.70
   6  -8   0 1538.35   43.00
   6  -8   0 1509.65   41.60
  -6  -8   0 1537.55   46.30
  -6  -8   0 1576.04   45.90
  -6  -8   0 1574.84   46.70
  -6  -8   0 1597.64   45.30
   6   8   0 1554.14   46.80
   6   8   0 1601.44   45.20
   6   8   0 1588.34   47.20
   6   8   0 1563.04   45.40
  -6   8   0 1530.05   42.00
  -6   8   0 1580.64   41.40
  -6   8   0 1595.24   41.40
  -7  -8   0   24.00   10.50
   7  -8   0   15.70    7.00
  -7  -8   0   27.60   12.40
   7  -8   0   18.10    7.10
  -7  -8   0   13.00    9.80
  -7  -8   0   14.10   10.00
  -7  -8   0   22.00   10.70
   7  -8   0   13.90    8.10
   7  -8   0   23.20    8.20
  -7  -8   0   16.90   10.10
  -7   8   0   13.10    7.30
   7   8   0   34.60   10.40
   7   8   0   23.00   11.40
   7   8   0   19.50   11.40
  -7   8   0   17.50    7.00
  -7   8   0    9.90    6.10
  -7   8   0   16.00    6.20
   7   8   0   10.70    9.20
  -8  -8   0  630.84   32.30
  -8  -8   0  601.44   27.80
  -8  -8   0  626.44   29.40
   8  -8   0  578.24   24.70
  -8  -8   0  599.64   28.50
  -8  -8   0  582.14   28.00
   8  -8   0  600.44   24.40
   8  -8   0  593.34   23.10
   8  -8   0  567.64   22.60
  -8  -8   0  599.94   26.70
   8   8   0  611.54   30.50
  -8   8   0  547.05   22.80
   8   8   0  561.24   26.70
  -8   8   0  558.04   22.70
  -8   8   0  599.04   21.70
   8   8   0  576.04   29.50
   8   8   0  595.74   26.40
  -8   8   0  600.14   21.60
   9  -8   0   25.60   11.50
  -9  -8   0   34.90   14.20
  -9  -8   0   45.70   14.50
   9  -8   0   36.20   10.40
  -9  -8   0   25.20   12.70
   9  -8   0   32.70   10.90
  -9  -8   0   37.20   15.00
  -9  -8   0   41.60   13.70
  -9  -8   0   63.49   16.90
   9  -8   0   39.50   12.20
   9   8   0   40.70   13.30
   9   8   0   34.70   14.80
   9   8   0   36.70   15.40
   9   8   0   51.99   14.10
  -9   8   0   26.70    9.60
  -9   8   0   37.70   10.70
  -9   8   0   28.40   10.50
  -9   8   0   38.60    9.70
 -10  -8   0  692.03   33.90
 -10  -8   0  692.13   34.50
 -10  -8   0  717.23   36.40
  10  -8   0  724.13   29.70
  10  -8   0  748.73   32.10
  10  -8   0  707.03   32.20
 -10  -8   0  678.93   39.80
  10  -8   0  724.43   28.90
 -10  -8   0  722.13   36.10
  10   8   0  731.43   38.30
 -10   8   0  675.53   28.40
  10   8   0  751.62   34.20
 -10   8   0  663.93   26.50
  10   8   0  651.83   36.50
  11  -8   0   22.00   14.60
 -11  -8   0    9.00   16.80
 -11  -8   0   20.80   17.10
 -11  -8   0    0.70   17.30
 -11  -8   0   10.50   17.90
  11  -8   0   20.40   14.30
  11  -8   0   14.50   13.00
 -11  -8   0    2.30   19.70
  11  -8   0   21.70   13.90
 -11   8   0    5.90    9.20
  11   8   0   -3.80   14.90
  11   8   0   16.40   16.30
 -11   8   0    6.00    8.70
 -11   8   0   -1.30   11.20
  11   8   0   20.40   19.30
  11   8   0   31.30   18.50
   0  -9   0    9.00    4.00
   0  -9   0    4.00    3.90
   0  -9   0    4.30    4.50
   0  -9   0    2.00    3.30
   0  -9   0   -2.60    3.40
   0  -9   0    1.10    4.30
  -1  -9   0    1.10    4.80
  -1  -9   0   -0.10    4.50
  -1  -9   0    3.80    5.20
  -1  -9   0   -0.20    4.90
   1  -9   0    3.10    3.30
  -1  -9   0   -3.80    4.40
   1  -9   0    4.20    3.60
  -1  -9   0    2.00    5.40
   1   9   0    2.30    4.30
   1   9   0    7.40    3.70
  -2  -9   0  174.88   12.90
  -2  -9   0  179.08   12.70
  -2  -9   0  203.48   14.50
  -2  -9   0  178.68   12.10
  -2  -9   0  182.28   13.30
  -2  -9   0  189.28   12.00
   2   9   0  179.88   13.30
   2   9   0  192.78   10.90
   2   9   0  187.18   13.80
   2   9   0  184.58   12.00
  -3  -9   0   60.39    9.40
  -3  -9   0   61.19    9.30
   3  -9   0   57.09    4.70
  -3  -9   0   56.09    9.40
  -3  -9   0   59.09    9.80
  -3  -9   0   62.69    9.60
  -3  -9   0   63.39   10.80
   3   9   0   52.39    8.20
   3   9   0   82.29    9.50
   3   9   0   49.50    9.70
   3   9   0   53.69    9.30
  -4  -9   0  719.93   26.20
   4  -9   0  646.94   20.10
  -4  -9   0  728.43   25.70
  -4  -9   0  740.83   28.00
  -4  -9   0  716.73   25.40
  -4  -9   0  729.23   26.50
  -4  -9   0  763.52   25.30
   4  -9   0  633.44   18.90
   4  -9   0  716.23   19.00
   4  -9   0  655.73   20.40
   4   9   0  692.53   26.60
   4   9   0  733.93   24.30
   4   9   0  759.02   25.10
   4   9   0  702.93   26.20
  -5  -9   0  207.18   16.20
  -5  -9   0  229.48   16.90
   5  -9   0  192.48    9.30
   5  -9   0  187.98   11.20
  -5  -9   0  185.88   15.10
  -5  -9   0  221.08   19.10
  -5  -9   0  222.98   17.10
   5  -9   0  180.98   10.90
   5  -9   0  192.28    9.50
  -5  -9   0  199.98   15.50
  -5   9   0  199.48    8.60
   5   9   0  198.08   14.50
   5   9   0  204.18   17.50
  -5   9   0  171.68    9.10
   5   9   0  239.98   15.70
   5   9   0  189.38   17.00
  -5   9   0  188.88    9.30
  -5   9   0  220.88    9.10
  -6  -9   0  365.06   19.50
   6  -9   0  371.46   14.10
  -6  -9   0  379.96   19.00
  -6  -9   0  385.56   23.10
  -6  -9   0  360.76   20.50
   6  -9   0  369.16   15.50
   6  -9   0  346.67   15.80
  -6  -9   0  369.76   19.60
   6  -9   0  354.26   13.90
  -6  -9   0  368.16   20.70
  -6   9   0  373.86   13.40
  -6   9   0  368.46   14.10
   6   9   0  382.06   19.50
   6   9   0  385.46   21.60
   6   9   0  371.76   18.40
  -6   9   0  304.97   15.10
  -6   9   0  383.56   13.30
   6   9   0  373.36   21.10
   7  -9   0  145.69   12.30
  -7  -9   0  157.18   13.90
  -7  -9   0  179.88   19.60
  -7  -9   0  133.29   13.60
  -7  -9   0  133.29   13.60
   7  -9   0  146.69   14.40
  -7  -9   0  140.19   15.40
   7  -9   0  138.99   12.20
  -7  -9   0  166.48   17.90
   7  -9   0  146.69   14.10
  -7   9   0  136.49   10.90
   7   9   0  158.98   13.60
  -7   9   0  123.29   10.80
  -7   9   0  133.49   12.30
   7   9   0  156.18   17.00
   7   9   0  127.89   13.90
   7   9   0  128.59   14.60
   8  -9   0  324.67   17.40
  -8  -9   0  319.77   27.60
  -8  -9   0  380.06   25.50
  -8  -9   0  319.37   23.60
   8  -9   0  318.17   19.40
  -8  -9   0  367.96   22.40
  -8  -9   0  283.17   24.00
   8  -9   0  307.07   17.50
  -8  -9   0  360.96   23.50
   8  -9   0  307.87   19.80
   8   9   0  342.67   25.50
  -8   9   0  318.37   16.00
  -8   9   0  258.57   15.90
   8   9   0  297.17   25.70
   8   9   0  359.16   22.80
  -8   9   0  291.77   15.70
  -8   9   0  335.77   17.40
   8   9   0  319.57   21.80
  -9  -9   0  178.18   19.00
  -9  -9   0  192.18   18.10
  -9  -9   0  158.18   17.50
   9  -9   0  202.38   17.40
   9  -9   0  201.98   18.30
  -9  -9   0  171.48   17.10
   9  -9   0  224.38   20.00
  -9  -9   0  238.78   22.20
   9  -9   0  139.79   14.70
  -9  -9   0  235.08   22.50
   9   9   0  241.58   23.70
  -9   9   0  171.68   17.10
  -9   9   0  206.38   15.80
   9   9   0  165.88   18.70
   9   9   0  220.08   20.70
  -9   9   0  176.78   17.60
   9   9   0  159.18   15.10
  -9   9   0  175.68   15.80
 -10  -9   0  296.97   30.00
 -10  -9   0  334.77   34.70
  10  -9   0  293.37   24.50
  10  -9   0  364.16   21.80
  10  -9   0  360.46   23.10
 -10  -9   0  326.57   30.20
 -10  -9   0  353.56   28.30
  10  -9   0  357.86   25.00
 -10  -9   0  335.87   28.20
  10   9   0  342.07   32.50
  10   9   0  340.27   32.00
  10   9   0  357.06   27.80
 -10   9   0  320.87   20.00
 -11  -9   0   98.69   19.80
  11  -9   0   62.69   13.90
  11  -9   0   77.99   16.50
 -11  -9   0   60.89   18.30
 -11  -9   0   63.89   21.30
  11  -9   0   57.79   14.50
 -11  -9   0   71.29   20.40
 -11  -9   0   53.89   17.90
  11  -9   0   66.79   15.40
 -11  -9   0   76.09   17.80
 -11   9   0   51.09   12.10
  11   9   0   82.09   21.40
  11   9   0  107.49   21.20
  11   9   0  104.89   18.30
  11   9   0   46.10   16.00
   0 -10   0  690.03   20.20
   0 -10   0  701.13   20.60
   0 -10   0  659.33   19.00
   0 -10   0  692.73   21.00
   0 -10   0  656.43   20.10
   0 -10   0  672.63   19.70
  -1 -10   0 2175.18   55.99
  -1 -10   0 2164.38   55.39
  -1 -10   0 2165.58   56.39
   1 -10   0 2122.49   54.19
  -1 -10   0 2150.78   56.09
   1 -10   0 2135.29   54.49
  -1 -10   0 2092.79   55.69
  -1 -10   0 2159.78   56.69
   1 -10   0 2120.49   54.19
   1  10   0 2219.28   54.99
   1  10   0 2205.68   54.39
  -2 -10   0  360.86   16.60
  -2 -10   0  348.67   16.90
  -2 -10   0  373.66   17.40
  -2 -10   0  368.66   19.10
  -2 -10   0  405.96   18.10
  -2 -10   0  358.36   17.30
   2  10   0  394.86   16.40
   2  10   0  359.16   14.90
   2  10   0  371.36   17.10
  -3 -10   0 1402.06   41.20
  -3 -10   0 1453.15   41.90
  -3 -10   0 1469.75   43.40
  -3 -10   0 1467.75   41.90
  -3 -10   0 1436.16   42.40
  -3 -10   0 1485.25   41.60
   3  10   0 1475.55   42.50
   3  10   0 1492.35   41.10
   3  10   0 1446.96   40.50
   3  10   0 1491.85   42.30
  -4 -10   0 1143.19   34.90
   4 -10   0 1082.49   29.20
  -4 -10   0 1102.69   34.20
  -4 -10   0 1098.49   36.00
  -4 -10   0 1094.19   33.50
  -4 -10   0 1082.19   34.10
  -4 -10   0 1101.89   33.80
   4 -10   0 1068.09   28.80
   4  10   0 1107.59   34.50
   4  10   0 1103.39   35.00
   4  10   0 1082.09   32.60
   4  10   0 1091.19   33.30
  -5 -10   0 1104.59   34.90
   5 -10   0 1004.80   29.50
  -5 -10   0 1145.39   36.70
  -5 -10   0 1065.39   33.80
  -5 -10   0 1085.79   34.20
   5 -10   0 1009.00   29.30
  -5 -10   0 1145.09   33.90
   5 -10   0  990.60   28.50
  -5 -10   0 1077.29   34.40
   5 -10   0 1045.30   28.40
   5  10   0 1120.89   35.50
   5  10   0 1124.49   33.00
  -5  10   0  986.00   28.00
   5  10   0 1127.69   33.80
  -5  10   0 1069.89   28.00
   5  10   0 1122.09   35.00
  -6 -10   0  600.94   24.80
   6 -10   0  577.04   20.00
  -6 -10   0  617.24   27.90
   6 -10   0  596.94   18.90
  -6 -10   0  614.64   24.30
   6 -10   0  599.94   20.50
  -6 -10   0  586.64   25.50
   6 -10   0  585.44   18.90
  -6 -10   0  585.74   24.80
  -6 -10   0  640.24   25.90
   6  10   0  616.34   23.60
  -6  10   0  604.44   18.10
  -6  10   0  562.94   18.30
  -6  10   0  581.34   18.10
   6  10   0  615.24   26.50
   6  10   0  602.94   24.30
  -6  10   0  614.24   17.60
   6  10   0  585.74   25.80
  -7 -10   0  844.82   30.90
  -7 -10   0  831.52   31.50
   7 -10   0  833.62   27.00
  -7 -10   0  856.21   32.80
   7 -10   0  839.82   27.70
  -7 -10   0  840.42   35.10
  -7 -10   0  854.11   32.80
   7 -10   0  827.02   26.00
  -7 -10   0  844.92   31.80
   7 -10   0  824.62   25.90
   7  10   0  849.12   30.50
   7  10   0  829.02   33.00
  -7  10   0  837.42   24.50
   7  10   0  846.32   31.50
   7  10   0  880.91   33.80
  -7  10   0  767.32   25.10
  -7  10   0  801.12   25.20
  -7  10   0  842.62   24.70
  -8 -10   0   43.60   13.70
  -8 -10   0   47.70   12.40
   8 -10   0   47.60   10.30
  -8 -10   0   56.09   13.40
   8 -10   0   34.70   10.20
  -8 -10   0   23.70   12.30
  -8 -10   0   26.80   14.70
   8 -10   0   46.30    9.00
  -8 -10   0   40.70   13.70
   8 -10   0   30.00    9.10
   8  10   0   34.40   14.50
  -8  10   0   42.50    7.90
   8  10   0   31.40   11.40
   8  10   0   36.30   13.00
   8  10   0   17.10   13.60
  -8  10   0   38.90    7.60
  -8  10   0   31.30    8.50
   9 -10   0  156.38   13.70
  -9 -10   0  177.38   18.10
  -9 -10   0  156.38   15.60
  -9 -10   0  167.48   18.30
  -9 -10   0  189.68   21.30
   9 -10   0  156.98   14.90
  -9 -10   0  164.68   19.40
  -9 -10   0  166.78   17.10
   9 -10   0  191.78   16.80
   9 -10   0  172.88   19.10
   9  10   0  210.38   20.50
   9  10   0  179.08   17.90
  -9  10   0  165.18   15.10
  -9  10   0  172.58   16.00
  -9  10   0  158.78   14.70
   9  10   0  149.29   18.70
 -10 -10   0  155.58   20.20
  10 -10   0  160.08   16.10
 -10 -10   0  165.68   18.60
 -10 -10   0  155.38   20.10
  10 -10   0  185.98   20.60
 -10 -10   0  160.58   22.30
  10 -10   0  143.39   16.00
  10 -10   0  185.88   19.10
 -10 -10   0  187.68   19.70
  10  10   0  152.08   17.50
  10  10   0  173.18   21.90
 -10  10   0  157.48   17.10
  10  10   0  160.08   20.70
  10  10   0  150.58   18.80
 -11 -10   0  145.49   21.80
 -11 -10   0  120.89   23.40
 -11 -10   0  150.98   19.50
  11 -10   0  128.99   15.90
 -11 -10   0   81.89   18.10
 -11 -10   0   89.19   18.80
  11 -10   0   93.39   14.60
  11 -10   0   96.99   16.20
 -11 -10   0  113.09   20.50
  11 -10   0  115.59   16.50
 -11  10   0   83.89   12.20
  11  10   0  114.39   19.40
  11  10   0   85.49   18.50
  11  10   0   83.09   17.90
  11  10   0  101.99   22.40
   0 -11   0    8.90    5.20
   0 -11   0   -1.90    6.60
   0 -11   0    3.80    5.70
   0 -11   0   -2.50    6.00
   0 -11   0    3.10    6.00
   0 -11   0    0.90    6.90
  -1 -11   0   81.89    8.70
  -1 -11   0   86.89    9.20
  -1 -11   0   88.99    9.50
   1 -11   0   81.29    6.70
  -1 -11   0   80.99    8.00
   1 -11   0   86.09    7.10
   1 -11   0   74.99    6.20
  -1 -11   0   77.59    8.50
  -1 -11   0   76.99    8.30
   1 -11   0   86.49    8.70
   1 -11   0   72.39    5.70
  -2 -11   0   10.80    7.80
   2 -11   0    7.40    4.50
  -2 -11   0    2.40    8.10
  -2 -11   0    4.70    8.10
  -2 -11   0    3.70    7.70
  -2 -11   0   13.00    8.90
  -2 -11   0    1.20    7.40
   2  11   0    0.10    4.30
   2  11   0    6.30    7.20
   2  11   0   10.10    6.30
  -3 -11   0   14.40    8.70
  -3 -11   0   31.40    8.60
  -3 -11   0   15.50    9.60
  -3 -11   0   15.70    8.00
  -3 -11   0   11.40    7.90
  -3 -11   0   13.40    8.30
   3  11   0    8.80    7.00
   3  11   0   23.00    8.70
   3  11   0   15.60    7.70
   3  11   0   26.60    9.20
  -4 -11   0  376.66   18.90
  -4 -11   0  363.66   19.40
   4 -11   0  356.06   12.40
   4 -11   0  361.86   11.80
  -4 -11   0  378.96   18.20
  -4 -11   0  342.57   18.70
  -4 -11   0  375.36   21.10
  -4 -11   0  363.16   18.30
   4  11   0  367.56   16.70
   4  11   0  377.96   19.50
   4  11   0  385.76   19.60
   4  11   0  376.76   18.00
   5 -11   0  474.35   14.80
  -5 -11   0  510.95   21.30
  -5 -11   0  498.85   22.50
   5 -11   0  456.35   16.10
  -5 -11   0  508.95   24.50
  -5 -11   0  504.35   21.80
  -5 -11   0  499.85   21.60
   5 -11   0  490.65   14.80
  -5 -11   0  466.35   22.00
   5 -11   0  460.05   15.90
   5  11   0  528.45   23.30
   5  11   0  527.85   21.10
   5  11   0  503.45   20.20
   5  11   0  489.55   22.80
   6 -11   0   15.50    5.50
  -6 -11   0   22.60   11.70
  -6 -11   0    1.90    9.00
  -6 -11   0    5.80    9.00
  -6 -11   0    7.80    9.90
  -6 -11   0   21.60   10.80
   6 -11   0   13.80    6.50
   6 -11   0   12.40    5.30
   6 -11   0   15.10    6.50
  -6 -11   0   -2.50    8.80
   6  11   0   14.00   10.30
   6  11   0   -1.90    9.40
   6  11   0   16.60   10.70
  -6  11   0   10.40    4.30
   6  11   0    3.20    8.40
  -6  11   0   10.20    4.60
  -7 -11   0  376.76   26.60
  -7 -11   0  358.96   23.90
  -7 -11   0  361.76   24.20
  -7 -11   0  362.36   22.10
   7 -11   0  332.47   16.90
   7 -11   0  343.77   17.70
  -7 -11   0  393.76   22.80
   7 -11   0  336.77   15.80
  -7 -11   0  367.06   23.00
   7 -11   0  334.57   15.50
  -7  11   0  367.86   13.90
  -7  11   0  344.97   14.20
   7  11   0  394.46   22.60
  -7  11   0  329.47   13.10
   7  11   0  322.97   24.40
  -7  11   0  345.37   14.00
   7  11   0  394.86   25.50
   7  11   0  366.46   21.30
  -8 -11   0  -12.20   14.60
  -8 -11   0  -14.70   12.70
   8 -11   0   -2.10    7.80
   8 -11   0    0.90    9.20
   8 -11   0   10.10    9.50
  -8 -11   0   -1.80   12.20
  -8 -11   0   15.20   13.10
  -8 -11   0   11.30   13.00
   8 -11   0   11.40    8.40
  -8 -11   0    3.10   12.40
  -8  11   0    4.80    6.40
  -8  11   0   -4.70    6.90
  -8  11   0    1.80    6.60
   8  11   0   -7.90   12.90
  -8  11   0   -1.20    7.40
   8  11   0   -8.50   11.30
   8  11   0   11.40   14.10
   8  11   0   -1.40   12.40
  -9 -11   0  926.41   37.80
   9 -11   0  906.61   33.10
   9 -11   0  925.91   32.00
   9 -11   0  915.01   31.20
  -9 -11   0 1001.00   43.60
  -9 -11   0  965.50   39.60
   9 -11   0  905.01   33.70
  -9 -11   0  922.91   38.80
  -9 -11   0  952.50   40.10
  -9  11   0  902.71   29.10
   9  11   0 1004.30   38.20
  -9  11   0  913.61   29.80
   9  11   0  991.20   41.10
   9  11   0  976.00   41.10
  -9  11   0  880.61   28.70
  10 -11   0  121.59   15.00
 -10 -11   0  136.59   20.00
  10 -11   0  128.19   13.60
 -10 -11   0  100.09   18.50
 -10 -11   0   89.79   17.80
  10 -11   0  116.69   14.60
 -10 -11   0   83.19   18.60
 -10 -11   0  121.49   19.10
 -10 -11   0  101.79   21.80
  10 -11   0  115.59   14.10
  10  11   0  101.79   17.00
  10  11   0  114.89   18.50
  10  11   0  123.49   20.30
 -10  11   0   71.49   10.10
  10  11   0   83.59   17.20
 -10  11   0  120.09   11.60
  11 -11   0  569.44   29.80
  11 -11   0  634.34   31.90
  11 -11   0  596.84   31.50
 -11 -11   0  583.44   38.60
 -11 -11   0  633.54   43.60
 -11 -11   0  633.34   37.60
  11 -11   0  636.34   29.40
 -11 -11   0  627.54   39.80
 -11 -11   0  569.84   35.30
 -11 -11   0  605.94   35.50
  11  11   0  581.04   41.20
 -11  11   0  520.95   24.60
  11  11   0  631.54   35.80
  11  11   0  541.95   34.10
  11  11   0  638.44   39.90
   0 -12   0 1742.93   46.00
   0 -12   0 1741.23   45.70
   0 -12   0 1706.23   45.90
   0 -12   0 1762.52   46.40
   0 -12   0 1753.72   45.20
   0 -12   0 1774.52   46.80
  -1 -12   0 2668.33   66.79
  -1 -12   0 2577.24   67.09
  -1 -12   0 2487.95   65.89
   1 -12   0 2578.44   64.59
   1 -12   0 2565.94   64.89
   1 -12   0 2521.35   64.29
  -1 -12   0 2551.34   66.19
  -1 -12   0 2515.45   65.49
  -1 -12   0 2555.34   66.19
   1 -12   0 2538.25   64.39
   1 -12   0 2531.35   63.39
  -2 -12   0   55.49    8.30
  -2 -12   0   61.49    9.20
  -2 -12   0   60.99    8.60
   2 -12   0   62.59    5.50
  -2 -12   0   53.79    9.50
  -2 -12   0   71.79    9.30
  -2 -12   0   65.59    8.80
   2  12   0   65.29    7.00
   2  12   0   58.29    7.80
  -3 -12   0 3955.20  103.19
  -3 -12   0 3953.00  102.19
  -3 -12   0 3961.80  102.19
  -3 -12   0 4009.00  102.69
  -3 -12   0 3938.41  101.79
  -3 -12   0 3946.01  101.89
   3  12   0 3987.00  101.39
   3  12   0 4074.99  100.89
   3  12   0 4018.20  102.59
  -4 -12   0   47.30    8.80
   4 -12   0   59.49    6.60
  -4 -12   0   34.80    8.70
  -4 -12   0   43.80    9.10
  -4 -12   0   59.69    9.30
  -4 -12   0   53.99    9.60
  -4 -12   0   59.79   10.90
   4  12   0   54.79    8.10
   4  12   0   52.59    9.70
   4  12   0   66.49   10.20
   4  12   0   49.00    8.60
  -5 -12   0 1947.91   56.59
  -5 -12   0 1970.60   54.79
  -5 -12   0 1972.50   55.49
   5 -12   0 1865.01   49.70
  -5 -12   0 1939.01   54.29
  -5 -12   0 1960.90   54.59
   5 -12   0 1907.61   48.80
   5 -12   0 1826.72   48.70
  -5 -12   0 1959.70   55.09
   5 -12   0 1893.01   49.40
   5  12   0 1908.91   55.59
   5  12   0 1996.20   54.19
   5  12   0 1957.40   53.39
   5  12   0 1973.00   55.49
  -6 -12   0   36.90   11.60
  -6 -12   0   33.70   10.60
   6 -12   0   50.39    6.80
  -6 -12   0   19.20    9.70
   6 -12   0   37.40    7.10
  -6 -12   0   35.60   12.80
  -6 -12   0   52.49   11.40
   6 -12   0   39.60    5.90
  -6 -12   0   39.90   10.30
   6 -12   0   37.70    5.90
   6  12   0   46.80   11.90
   6  12   0   53.39   11.60
   6  12   0   37.60   10.40
   6  12   0   46.90   10.00
  -7 -12   0  625.84   29.70
  -7 -12   0  619.24   28.60
   7 -12   0  621.84   22.20
   7 -12   0  615.44   21.30
  -7 -12   0  677.63   28.10
  -7 -12   0  642.74   32.40
   7 -12   0  627.04   23.00
  -7 -12   0  650.93   30.40
  -7 -12   0  647.84   28.50
   7 -12   0  613.34   21.10
   7  12   0  643.64   26.80
   7  12   0  648.64   30.60
  -7  12   0  595.94   19.20
   7  12   0  631.74   28.30
   7  12   0  650.83   30.80
  -7  12   0  644.44   19.20
  -8 -12   0   28.00   13.00
   8 -12   0   38.50    8.70
   8 -12   0   41.90   10.00
   8 -12   0   47.20    9.80
  -8 -12   0   31.90   14.00
   8 -12   0   40.10    9.40
  -8 -12   0   60.49   17.50
  -8 -12   0   45.40   13.80
  -8 -12   0   47.70   13.30
  -8 -12   0   60.39   14.80
   8  12   0   49.30   15.20
   8  12   0   71.09   13.10
   8  12   0   42.20   13.30
   8  12   0   48.80   14.80
  -8  12   0   37.60    6.90
  -8  12   0   34.50    6.30
  -8  12   0   41.50    7.00
   9 -12   0  186.78   18.50
  -9 -12   0  174.08   22.10
  -9 -12   0  175.08   18.30
  -9 -12   0  165.68   18.70
  -9 -12   0  142.09   17.80
   9 -12   0  167.08   17.30
  -9 -12   0  178.68   18.90
   9 -12   0  183.08   19.20
   9 -12   0  185.58   16.10
   9  12   0  123.79   17.90
   9  12   0  164.58   17.40
  -9  12   0  176.68   13.70
  -9  12   0  166.28   13.70
  -9  12   0  191.58   12.80
   9  12   0  137.89   19.20
 -10 -12   0   11.10   19.40
  10 -12   0   15.30   11.90
  10 -12   0   -8.10   12.10
 -10 -12   0   -2.20   16.50
 -10 -12   0   28.30   16.20
  10 -12   0    6.40   10.80
  10 -12   0    0.30   11.90
 -10 -12   0   -9.50   15.00
 -10 -12   0    7.70   16.90
 -10 -12   0   15.60   16.30
 -10  12   0    3.10    8.90
  10  12   0   -1.90   17.50
  10  12   0   22.30   15.60
  10  12   0   -4.70   15.40
 -10  12   0   10.30    9.30
  10  12   0   -9.70   14.50
 -10  12   0    7.00    6.60
  11 -12   0  182.88   17.50
 -11 -12   0  220.58   23.20
 -11 -12   0  191.58   23.10
  11 -12   0  178.38   18.00
 -11 -12   0  166.48   25.90
 -11 -12   0  149.69   23.10
 -11 -12   0  176.68   21.80
  11 -12   0  158.48   17.60
 -11 -12   0  163.48   21.50
  11 -12   0  163.68   16.30
 -11  12   0  171.18   17.20
  11  12   0  163.68   20.20
  11  12   0  174.38   25.10
  11  12   0  191.08   21.70
   0 -13   0    9.60    5.90
   0 -13   0   15.00    6.90
   0 -13   0    5.40    6.60
   0 -13   0    7.80    5.50
   0 -13   0   -1.10    5.90
   0 -13   0    2.30    6.20
  -1 -13   0   41.50    7.30
  -1 -13   0   37.90    7.60
   1 -13   0   27.20    6.00
  -1 -13   0   32.20    7.20
   1 -13   0   34.00    6.30
  -1 -13   0   30.80    6.80
   1 -13   0   31.20    5.80
  -1 -13   0   18.90    7.60
   1 -13   0   32.00    4.30
  -1 -13   0   38.30    8.40
   1 -13   0   35.00    5.70
  -2 -13   0  212.38   13.80
   2 -13   0  207.18    9.00
   2 -13   0  233.38   10.10
  -2 -13   0  218.08   16.00
  -2 -13   0  207.38   14.60
  -2 -13   0  230.58   15.20
  -2 -13   0  210.18   14.10
  -2 -13   0  219.58   14.80
   2  13   0  230.98   13.20
   2  13   0  237.28   11.40
  -3 -13   0  128.19   11.90
  -3 -13   0  112.39   10.10
  -3 -13   0  115.89   10.40
  -3 -13   0  112.49   10.30
  -3 -13   0  120.09   13.00
  -3 -13   0  134.29   14.60
   3  13   0  110.29   11.00
   3  13   0  121.49   12.60
   3  13   0  122.69   11.30
  -4 -13   0   70.29    9.50
  -4 -13   0   60.59    9.60
  -4 -13   0   61.39   10.70
  -4 -13   0   71.49    9.90
  -4 -13   0   61.69    9.80
  -4 -13   0   70.19   10.30
   4  13   0   64.09   10.10
   4  13   0   75.09    8.70
   4  13   0   79.69    9.50
   4  13   0   68.79   10.10
  -5 -13   0  291.37   18.80
  -5 -13   0  276.47   18.30
  -5 -13   0  334.17   20.00
   5 -13   0  241.08   11.20
   5 -13   0  241.18    9.40
   5 -13   0  257.57    9.80
  -5 -13   0  297.27   21.70
  -5 -13   0  303.47   18.00
  -5 -13   0  262.77   18.90
   5  13   0  269.57   16.40
   5  13   0  275.47   19.60
   5  13   0  278.67   20.30
   5  13   0  299.07   18.10
  -6 -13   0  606.24   26.60
   6 -13   0  567.74   19.80
  -6 -13   0  614.24   27.10
  -6 -13   0  619.34   26.20
  -6 -13   0  604.34   27.90
  -6 -13   0  596.44   29.60
   6 -13   0  572.34   19.20
   6 -13   0  551.24   18.20
  -6 -13   0  605.04   26.70
   6 -13   0  517.45   18.10
   6  13   0  576.84   25.60
   6  13   0  630.04   28.50
   6  13   0  580.94   24.40
   6  13   0  662.03   28.00
  -7 -13   0   65.49   11.10
   7 -13   0  104.89    8.70
  -7 -13   0   83.39   13.90
  -7 -13   0   93.89   16.40
  -7 -13   0  115.79   15.70
   7 -13   0  108.69    9.90
   7 -13   0  111.49   11.50
   7 -13   0  111.49    9.60
  -7 -13   0  113.29   15.10
  -7 -13   0  106.89   15.00
   7  13   0  120.49   14.60
   7  13   0   97.69   15.20
   7  13   0  107.69   14.70
   7  13   0   89.69   12.50
  -8 -13   0  159.28   16.60
  -8 -13   0  194.28   18.80
   8 -13   0  156.18   12.70
  -8 -13   0  145.69   19.90
   8 -13   0  152.38   15.50
  -8 -13   0  164.38   17.80
   8 -13   0  174.88   14.40
  -8 -13   0  169.98   16.80
   8 -13   0  168.28   14.90
   8  13   0  177.68   19.20
   8  13   0  164.18   16.40
  -8  13   0  165.58   10.70
   8  13   0  187.68   17.20
   8  13   0  188.98   19.50
  -8  13   0  161.18   10.80
   9 -13   0  487.35   21.80
   9 -13   0  523.45   24.70
  -9 -13   0  511.75   32.80
  -9 -13   0  492.85   36.00
   9 -13   0  513.05   23.80
  -9 -13   0  539.75   33.10
   9 -13   0  528.65   23.30
  -9 -13   0  527.35   31.00
  -9 -13   0  501.85   32.00
   9  13   0  504.05   34.10
  -9  13   0  516.85   18.90
   9  13   0  488.65   30.00
   9  13   0  511.45   33.40
  10 -13   0  141.39   14.00
 -10 -13   0  175.38   19.70
 -10 -13   0  143.69   23.70
 -10 -13   0  124.09   20.10
  10 -13   0  134.69   15.20
 -10 -13   0  156.88   20.60
  10 -13   0  105.69   14.00
  10 -13   0  148.69   14.90
 -10 -13   0  110.09   18.80
 -10 -13   0  143.19   19.70
  10  13   0  142.79   18.80
 -10  13   0  103.29   10.50
  10  13   0  145.39   22.10
  10  13   0  107.29   19.20
  10  13   0  118.39   18.00
   0 -14   0 2506.35   65.29
   0 -14   0 2580.84   65.99
   0 -14   0 2561.84   65.59
   0 -14   0 2604.24   66.39
   0 -14   0 2552.94   65.59
   0 -14   0 2520.25   64.89
   1 -14   0  958.80   27.60
   1 -14   0  957.50   27.30
  -1 -14   0 1101.39   29.90
   1 -14   0  924.61   25.80
  -1 -14   0  979.40   28.20
   1 -14   0  953.60   26.40
  -1 -14   0  962.70   29.10
   1 -14   0  949.51   26.80
   1 -14   0  941.91   26.80
  -1 -14   0  991.90   29.00
  -1 -14   0  939.51   28.50
  -1 -14   0  967.00   30.10
   2 -14   0 1808.02   48.10
  -2 -14   0 1868.31   51.19
  -2 -14   0 1903.61   51.59
  -2 -14   0 1898.11   50.99
   2 -14   0 1848.72   48.30
   2 -14   0 1778.82   47.70
  -2 -14   0 1923.81   51.59
  -2 -14   0 1934.61   52.79
  -2 -14   0 1943.81   51.99
   2  14   0 1961.60   49.99
   2  14   0 1936.41   49.20
  -3 -14   0  207.88   16.00
  -3 -14   0  207.88   14.70
  -3 -14   0  217.68   15.50
  -3 -14   0  192.28   15.10
  -3 -14   0  211.88   17.20
  -3 -14   0  236.88   14.90
   3  14   0  218.68   14.20
   3  14   0  220.28   12.50
  -4 -14   0  728.63   27.50
  -4 -14   0  705.03   26.30
  -4 -14   0  729.93   26.70
  -4 -14   0  705.73   26.70
  -4 -14   0  712.53   25.90
  -4 -14   0  698.63   28.50
   4  14   0  733.03   27.40
   4  14   0  727.13   24.50
   4  14   0  732.23   25.60
  -5 -14   0  841.92   30.40
  -5 -14   0  856.31   30.70
   5 -14   0  780.02   22.90
  -5 -14   0  812.52   29.80
  -5 -14   0  818.52   32.80
  -5 -14   0  790.12   29.80
  -5 -14   0  803.12   31.00
   5  14   0  852.91   28.20
   5  14   0  839.52   31.20
   5  14   0  812.52   29.10
   6 -14   0  474.35   17.50
   6 -14   0  463.05   16.40
  -6 -14   0  497.65   28.80
  -6 -14   0  492.15   25.70
  -6 -14   0  499.95   25.00
  -6 -14   0  486.45   25.00
   6 -14   0  440.76   15.80
  -6 -14   0  494.25   25.20
   6 -14   0  462.85   16.00
  -6 -14   0  475.85   26.20
   6  14   0  518.05   24.80
   6  14   0  462.15   26.00
   6  14   0  481.75   22.90
   6  14   0  521.85   27.10
  -7 -14   0  182.68   17.70
   7 -14   0  173.78   14.10
   7 -14   0  149.69   13.10
  -7 -14   0  178.08   16.60
  -7 -14   0  148.49   16.80
  -7 -14   0  174.08   18.00
   7 -14   0  141.99   12.00
   7 -14   0  153.58   12.30
  -7 -14   0  156.28   18.70
   7  14   0  141.19   14.80
   7  14   0  153.98   17.00
   7  14   0  179.98   16.40
   7  14   0  193.68   19.30
  -8 -14   0  353.96   26.50
  -8 -14   0  367.96   27.50
   8 -14   0  302.77   17.40
   8 -14   0  291.87   18.50
   8 -14   0  329.27   17.30
  -8 -14   0  311.07   26.50
  -8 -14   0  310.87   31.20
   8 -14   0  298.67   16.30
  -8 -14   0  346.57   27.90
   8  14   0  353.16   29.40
   8  14   0  337.47   25.50
   8  14   0  321.87   24.10
   8  14   0  301.77   27.90
  -9 -14   0   27.00   16.50
   9 -14   0   40.20   10.80
   9 -14   0   47.00    9.50
   9 -14   0   24.50   10.80
   9 -14   0   29.00   10.20
  -9 -14   0   33.00   16.00
  -9 -14   0   55.39   17.60
  -9 -14   0   -1.90   18.20
  -9 -14   0   38.60   16.30
  -9 -14   0   38.50   15.80
   9  14   0   26.40   15.40
   9  14   0   11.50   17.30
 -10 -14   0  255.77   24.70
  10 -14   0  192.78   19.60
  10 -14   0  203.58   20.90
  10 -14   0  241.88   21.60
 -10 -14   0  204.68   26.00
 -10 -14   0  227.88   21.60
 -10 -14   0  201.58   21.50
 -10 -14   0  224.28   21.70
  10 -14   0  212.98   20.80
 -10 -14   0  245.08   24.50
  10  14   0  226.28   23.90
 -10  14   0  214.58   14.50
  10  14   0  252.17   27.50
  10  14   0  224.38   21.60
   0 -15   0    2.60    5.80
   0 -15   0    7.30    6.90
   0 -15   0    6.20    5.30
   0 -15   0    2.80    5.60
   0 -15   0   -1.30    6.20
   0 -15   0    6.50    5.70
  -1 -15   0   -1.00    6.30
  -1 -15   0   -1.70    6.60
   1 -15   0    6.00    4.30
   1 -15   0   -1.60    5.30
   1 -15   0   -0.10    5.50
  -1 -15   0   -3.80    6.20
  -1 -15   0    3.80    7.00
  -1 -15   0   -4.30    7.20
  -1 -15   0    2.90    6.10
   1 -15   0    8.80    4.90
   1 -15   0   10.50    5.40
   1 -15   0   10.90    6.00
   2 -15   0  399.96   14.30
   2 -15   0  442.26   14.70
  -2 -15   0  450.05   19.20
  -2 -15   0  448.96   20.20
  -2 -15   0  450.55   18.40
  -2 -15   0  424.26   18.40
   2 -15   0  416.06   13.60
   2 -15   0  429.26   13.70
  -2 -15   0  427.66   18.60
  -2 -15   0  434.76   17.90
   2  15   0  472.65   16.40
  -3 -15   0   -2.60    7.80
  -3 -15   0   -2.50    7.30
  -3 -15   0   -7.30    8.70
  -3 -15   0    1.20    8.10
  -3 -15   0    4.90    7.40
  -3 -15   0    6.70    7.80
   3  15   0    0.90    7.10
   3  15   0    4.60    6.20
  -4 -15   0  136.99   12.60
  -4 -15   0  119.09   11.70
  -4 -15   0  146.59   12.90
  -4 -15   0  133.89   12.20
  -4 -15   0  125.79   13.70
  -4 -15   0  117.49   12.30
   4  15   0  104.99   12.00
   4  15   0  137.19   15.20
   4  15   0  123.79   13.00
  -5 -15   0   -0.40   11.90
  -5 -15   0    8.40    9.90
  -5 -15   0    6.60   10.00
  -5 -15   0   -5.80    9.20
  -5 -15   0    8.10   10.10
  -5 -15   0    2.90   10.90
   5  15   0   -3.30   10.60
   5  15   0   -5.60    9.70
   5  15   0   -2.30    8.70
  -6 -15   0  250.77   21.20
   6 -15   0  186.68   12.10
  -6 -15   0  270.57   21.60
  -6 -15   0  223.48   21.70
  -6 -15   0  192.08   18.50
   6 -15   0  188.78   10.60
  -6 -15   0  258.47   23.40
  -6 -15   0  235.28   21.10
   6 -15   0  185.28   10.30
   6  15   0  193.18   19.80
   6  15   0  229.18   22.80
   6  15   0  224.28   18.60
  -7 -15   0    9.40   12.50
  -7 -15   0   20.20   12.90
   7 -15   0   16.50    7.70
   7 -15   0   12.80    6.80
  -7 -15   0   10.40   13.10
   7 -15   0   12.70    6.80
  -7 -15   0   22.00   14.00
  -7 -15   0   11.60   15.80
   7 -15   0    6.20    6.90
   7  15   0   -4.50   13.10
   7  15   0    5.60   12.40
   7  15   0   11.20   11.80
  -8 -15   0  293.97   27.50
   8 -15   0  254.27   15.90
   8 -15   0  249.08   16.20
  -8 -15   0  274.17   25.60
   8 -15   0  228.18   16.90
   8 -15   0  258.87   15.40
  -8 -15   0  283.97   27.00
  -8 -15   0  317.27   31.60
  -8 -15   0  291.17   26.50
   8  15   0  279.37   28.40
   8  15   0  299.27   25.60
   8  15   0  296.57   23.80
  -9 -15   0  103.59   19.30
  -9 -15   0  114.29   18.60
  -9 -15   0  106.29   18.40
  -9 -15   0  124.79   26.60
   9 -15   0  130.49   12.70
  -9 -15   0   75.79   21.50
   9 -15   0  107.79   12.30
  -9 -15   0  144.79   20.00
   9 -15   0  134.79   11.90
   9 -15   0  134.59   12.30
   9  15   0  169.18   21.70
   9  15   0  127.39   18.40
 -10 -15   0  478.35   38.10
 -10 -15   0  506.15   35.50
  10 -15   0  480.55   25.60
 -10 -15   0  522.55   33.70
 -10 -15   0  560.44   36.80
  10 -15   0  516.65   24.30
 -10 -15   0  503.75   34.00
  10 -15   0  494.55   25.90
 -10 -15   0  482.95   41.80
  10  15   0  553.94   37.70
  10  15   0  561.04   33.90
  10  15   0  517.65   32.70
   0 -16   0  778.12   23.60
   0 -16   0  800.62   25.60
   0 -16   0  809.72   25.00
   0 -16   0  783.52   24.20
   0 -16   0  812.42   24.70
   0 -16   0  801.02   24.30
   1 -16   0   55.89    6.30
  -1 -16   0   54.99    7.90
  -1 -16   0   66.29    8.00
   1 -16   0   55.69    5.60
  -1 -16   0   52.99    7.50
   1 -16   0   56.29    6.80
   1 -16   0   57.29    7.10
  -1 -16   0   66.79    8.80
   1 -16   0   62.29    6.50
  -1 -16   0   51.89    8.10
  -1 -16   0   57.69    9.00
   1 -16   0   60.49    6.20
  -2 -16   0 1469.55   41.70
  -2 -16   0 1490.05   42.80
  -2 -16   0 1445.76   41.80
  -2 -16   0 1483.65   43.50
   2 -16   0 1441.06   38.60
   2 -16   0 1465.55   38.00
   2 -16   0 1480.75   38.20
  -2 -16   0 1534.15   42.50
   2 -16   0 1447.16   38.80
  -2 -16   0 1516.75   42.10
   2 -16   0 1416.96   37.40
  -3 -16   0  135.79   14.70
  -3 -16   0  141.89   15.80
  -3 -16   0  160.98   15.60
  -3 -16   0  145.69   12.60
  -3 -16   0  140.19   13.60
  -3 -16   0  141.59   14.50
   3  16   0  135.69   11.70
   3  16   0  137.09   13.90
  -4 -16   0 1190.08   40.50
  -4 -16   0 1200.98   38.50
  -4 -16   0 1166.38   38.30
  -4 -16   0 1201.38   37.70
  -4 -16   0 1199.48   37.90
  -4 -16   0 1159.88   38.70
   4  16   0 1225.68   35.90
   4  16   0 1239.18   37.00
  -5 -16   0   65.69   12.30
  -5 -16   0   65.99   14.10
  -5 -16   0   76.59   12.00
  -5 -16   0   70.29   13.00
  -5 -16   0   77.29   12.50
  -5 -16   0   83.79   12.30
   5  16   0   83.79   13.50
   5  16   0   77.29   10.90
   5  16   0   69.59   11.80
  -6 -16   0 1174.58   39.20
   6 -16   0 1042.90   30.10
  -6 -16   0 1128.89   39.30
   6 -16   0 1054.99   30.20
  -6 -16   0 1121.19   42.70
  -6 -16   0 1127.99   40.20
  -6 -16   0 1113.29   39.50
  -6 -16   0 1143.79   40.80
   6  16   0 1144.19   38.50
   6  16   0 1169.88   41.20
   6  16   0 1147.09   37.20
   7 -16   0   30.80    7.60
   7 -16   0   19.50    6.90
  -7 -16   0   43.10   14.10
  -7 -16   0   32.60   14.60
  -7 -16   0   38.50   14.70
  -7 -16   0   38.10   17.20
   7 -16   0   17.90    6.70
  -7 -16   0   45.10   14.10
   7  16   0   37.20   12.60
   7  16   0   41.80   13.50
   7  16   0   17.30   14.00
   8 -16   0  339.77   16.70
  -8 -16   0  369.16   29.00
   8 -16   0  342.57   17.70
  -8 -16   0  262.07   27.30
  -8 -16   0  390.56   28.10
   8 -16   0  328.57   16.60
   8 -16   0  366.36   17.30
  -8 -16   0  337.47   28.80
  -8 -16   0  317.97   32.70
   8  16   0  344.27   23.70
   8  16   0  332.67   29.80
   8  16   0  397.76   27.00
  -9 -16   0   65.59   17.00
  -9 -16   0   58.59   17.30
  -9 -16   0   59.99   18.70
   9 -16   0   50.39   10.90
  -9 -16   0   45.80   16.40
  -9 -16   0   42.50   20.60
   9 -16   0   59.69   11.00
   9 -16   0   32.20    9.50
  -9 -16   0   93.29   21.40
   9  16   0   57.99   16.40
   9  16   0   57.39   17.20
 -10 -16   0  325.37   36.70
  10 -16   0  336.47   22.90
  10 -16   0  339.07   21.10
  10 -16   0  325.17   22.60
 -10 -16   0  330.77   31.90
 -10 -16   0  380.46   41.30
 -10 -16   0  366.56   32.40
 -10 -16   0  368.16   33.40
 -10 -16   0  362.06   35.80
  10  16   0  397.56   31.90
  10  16   0  412.66   32.30
  10  16   0  372.96   35.60
   0 -17   0    2.40    5.80
   0 -17   0   -3.60    6.00
   0 -17   0    2.00    6.20
   0 -17   0   -0.40    7.00
   0 -17   0    6.20    6.20
   0 -17   0    8.60    6.70
   1 -17   0   69.39    7.10
  -1 -17   0   65.69    8.40
   1 -17   0   73.49    6.50
   1 -17   0   77.29    8.10
  -1 -17   0   72.39    8.70
  -1 -17   0   85.69    9.80
   1 -17   0   78.19    7.80
  -1 -17   0   83.49    9.90
  -1 -17   0   69.39    8.50
   1 -17   0   81.39    7.40
  -1 -17   0   77.69    8.90
   1 -17   0   70.59    6.90
   2 -17   0  185.28    9.70
   2 -17   0  199.28   11.00
  -2 -17   0  217.38   16.40
  -2 -17   0  197.58   15.80
   2 -17   0  204.78   11.30
   2 -17   0  208.68   10.20
  -2 -17   0  204.18   14.90
   2 -17   0  179.18    8.80
  -2 -17   0  206.98   17.50
  -2 -17   0  212.68   15.30
  -2 -17   0  197.28   15.40
  -3 -17   0  125.59   11.80
  -3 -17   0  122.39   11.70
  -3 -17   0  103.79   11.60
  -3 -17   0  107.09   11.50
  -3 -17   0  109.79   12.00
  -3 -17   0  112.69   13.50
   3  17   0  111.29   10.40
   3  17   0  102.59    8.80
  -4 -17   0  111.39   12.30
  -4 -17   0   87.39   12.30
  -4 -17   0   86.79   12.00
  -4 -17   0  114.59   12.90
  -4 -17   0  107.39   14.50
  -4 -17   0  102.29   12.20
   4  17   0   99.89   11.40
   4  17   0  110.49   10.50
  -5 -17   0  683.73   29.20
  -5 -17   0  644.34   32.70
  -5 -17   0  672.73   30.50
  -5 -17   0  724.93   30.20
  -5 -17   0  734.43   29.80
  -5 -17   0  723.23   29.60
   5  17   0  731.63   28.30
   5  17   0  714.23   26.50
   6 -17   0   37.90    5.70
  -6 -17   0   49.99   15.40
  -6 -17   0   36.60   12.40
  -6 -17   0   36.40   12.80
  -6 -17   0   28.10   12.10
   6 -17   0   37.70    5.70
  -6 -17   0   23.70   13.50
  -6 -17   0   26.90   13.50
   6  17   0   40.40   13.50
   6  17   0   47.70   12.60
   6  17   0   33.90   11.10
  -7 -17   0   97.19   16.00
   7 -17   0   73.89    7.90
   7 -17   0   73.89    8.00
  -7 -17   0   71.59   18.00
  -7 -17   0  101.09   15.80
  -7 -17   0  114.29   17.20
  -7 -17   0   60.39   15.70
   7  17   0   67.09   16.60
   7  17   0   88.59   15.00
   7  17   0   77.89   13.90
  -8 -17   0  226.98   20.60
  -8 -17   0  236.58   23.80
  -8 -17   0  221.38   20.60
  -8 -17   0  193.48   19.70
   8 -17   0  233.88   15.40
   8 -17   0  219.58   15.30
  -8 -17   0  223.68   21.30
   8 -17   0  223.38   14.40
   8  17   0  188.38   17.50
   8  17   0  243.88   22.40
   8  17   0  240.98   20.70
  -9 -17   0  108.49   19.90
   9 -17   0  100.59   11.10
   9 -17   0  115.49   11.90
  -9 -17   0   92.09   19.60
   9 -17   0   97.79   11.50
  -9 -17   0  119.89   20.20
  -9 -17   0   95.89   19.00
  -9 -17   0  137.09   19.90
  -9 -17   0  133.19   23.30
   9  17   0  101.49   19.60
   9  17   0   96.99   24.80
   9  17   0  110.39   18.80
   0 -18   0  337.67   15.10
   0 -18   0  344.57   16.60
   0 -18   0  350.06   17.50
   0 -18   0  338.57   15.60
   0 -18   0  314.17   15.40
   0 -18   0  352.56   16.10
  -1 -18   0  897.61   28.60
   1 -18   0  902.11   27.60
  -1 -18   0  923.61   29.80
   1 -18   0  908.61   27.00
  -1 -18   0  880.01   28.60
   1 -18   0  850.61   25.70
  -1 -18   0  907.41   30.30
   1 -18   0  894.61   26.40
   1 -18   0  874.21   26.50
   1 -18   0  914.01   26.60
  -1 -18   0  904.31   28.40
  -1 -18   0  902.11   28.90
  -2 -18   0   42.60    9.20
  -2 -18   0   33.00   10.40
  -2 -18   0   52.19    9.20
  -2 -18   0   40.70    9.30
   2 -18   0   49.99    6.10
   2 -18   0   57.89    6.80
   2 -18   0   39.90    6.50
   2 -18   0   46.30    5.80
  -2 -18   0   48.30   10.00
   2 -18   0   40.20    5.40
  -2 -18   0   47.50    9.40
  -3 -18   0  948.11   34.40
  -3 -18   0  924.41   32.70
  -3 -18   0  926.01   32.60
  -3 -18   0  910.61   31.60
  -3 -18   0  935.71   32.20
  -3 -18   0  960.50   32.10
   3  18   0  966.20   29.80
  -4 -18   0   13.80   10.60
  -4 -18   0    6.10   12.20
  -4 -18   0   29.80   10.90
  -4 -18   0   15.80   11.00
  -4 -18   0   16.90   10.70
  -4 -18   0   31.40   11.20
   4  18   0   13.00    9.90
   4  18   0   13.80    8.40
  -5 -18   0  436.76   26.00
  -5 -18   0  434.06   25.10
  -5 -18   0  450.05   24.90
  -5 -18   0  396.86   24.40
  -5 -18   0  431.36   29.00
  -5 -18   0  400.46   25.30
   5  18   0  427.96   23.20
   5  18   0  432.66   21.20
  -6 -18   0  542.35   29.60
  -6 -18   0  622.94   29.50
  -6 -18   0  606.34   31.20
  -6 -18   0  590.94   29.40
  -6 -18   0  550.14   29.00
  -6 -18   0  578.24   32.90
   6 -18   0  558.74   17.80
   6 -18   0  547.45   17.30
   6  18   0  563.74   27.70
   6  18   0  587.14   25.80
  -7 -18   0  598.54   31.20
  -7 -18   0  629.34   36.30
   7 -18   0  555.04   20.00
  -7 -18   0  648.64   32.20
   7 -18   0  560.14   19.50
  -7 -18   0  617.74   31.70
  -7 -18   0  621.14   32.40
  -7 -18   0  612.84   33.10
   7  18   0  581.34   33.40
   7  18   0  599.14   30.30
   7  18   0  615.84   28.70
   8 -18   0   -1.70    7.60
  -8 -18   0   10.80   19.20
  -8 -18   0   22.50   15.50
  -8 -18   0    7.70   15.30
   8 -18   0   23.80    8.40
   8 -18   0   22.10    7.80
  -8 -18   0   -5.10   15.10
  -8 -18   0   -1.40   17.80
  -8 -18   0   17.40   16.50
   8  18   0    0.70   10.40
   8  18   0    6.60   15.00
   8  18   0   52.29   17.70
  -9 -18   0  531.25   34.70
  -9 -18   0  531.25   36.30
  -9 -18   0  545.35   41.50
   9 -18   0  473.45   21.20
   9 -18   0  502.55   23.10
  -9 -18   0  544.05   37.70
  -9 -18   0  546.95   36.80
  -9 -18   0  557.24   34.40
   9 -18   0  482.15   21.60
   9  18   0  562.14   34.00
   9  18   0  552.24   31.80
   9  18   0  525.95   37.50
   0 -19   0   16.50    8.00
   0 -19   0    3.80    7.20
   0 -19   0   -1.60    8.10
   0 -19   0    2.10    7.50
   0 -19   0    8.20    7.10
   0 -19   0    0.80    7.10
   1 -19   0   57.39    7.70
  -1 -19   0   61.69   10.60
   1 -19   0   79.59    8.80
  -1 -19   0   52.29    9.10
  -1 -19   0   57.19    9.20
   1 -19   0   62.79    8.20
  -1 -19   0   52.19    9.40
   1 -19   0   62.49    7.70
  -1 -19   0   48.50   10.00
   1 -19   0   69.19    7.90
  -1 -19   0   45.90    9.10
   1 -19   0   53.29    7.20
  -2 -19   0    1.50    9.50
   2 -19   0   12.90    5.60
  -2 -19   0   26.30    9.50
  -2 -19   0   16.30    9.20
   2 -19   0   10.90    6.30
  -2 -19   0   17.80    8.90
  -2 -19   0   15.10   10.50
   2 -19   0    4.90    5.70
   2 -19   0   11.00    6.10
  -2 -19   0   15.30    9.10
   2 -19   0   15.40    6.70
   2 -19   0    7.10    5.40
   3 -19   0  233.68   10.30
  -3 -19   0  270.07   19.70
  -3 -19   0  270.17   19.00
  -3 -19   0  269.37   22.10
  -3 -19   0  264.97   19.40
  -3 -19   0  245.88   19.90
  -3 -19   0  265.47   19.60
  -4 -19   0    8.10   10.70
  -4 -19   0   13.60   11.10
  -4 -19   0    2.40   10.70
  -4 -19   0    7.10   12.60
  -4 -19   0    1.10   11.40
  -4 -19   0   -9.00   10.70
   4  19   0   -3.20    9.70
   4  19   0   -5.60    8.10
  -5 -19   0  316.87   23.50
  -5 -19   0  312.67   23.20
  -5 -19   0  291.97   26.80
  -5 -19   0  348.17   23.80
  -5 -19   0  356.76   25.30
  -5 -19   0  299.67   24.30
   5  19   0  312.47   19.30
   5  19   0  311.77   21.60
  -6 -19   0   -9.40   15.20
  -6 -19   0    0.90   12.80
  -6 -19   0    3.60   12.70
  -6 -19   0    4.10   12.70
  -6 -19   0    0.00   13.60
  -6 -19   0   -1.50   13.60
   6 -19   0    0.80    5.30
   6  19   0    7.90   12.30
   6  19   0    9.20   11.00
  -7 -19   0  316.17   28.20
  -7 -19   0  346.47   27.50
  -7 -19   0  368.46   28.30
   7 -19   0  311.67   14.70
   7 -19   0  317.27   14.20
  -7 -19   0  333.97   32.30
  -7 -19   0  337.77   28.90
  -7 -19   0  327.37   27.40
   7  19   0  392.76   26.30
   7  19   0  325.97   24.30
  -8 -19   0  -35.90   14.60
  -8 -19   0   14.40   19.30
   8 -19   0  -10.90    8.10
  -8 -19   0   22.40   15.70
  -8 -19   0    3.70   15.70
  -8 -19   0   11.00   16.40
  -8 -19   0  -15.40   15.50
   8 -19   0   -5.70    7.50
   8  19   0    1.80   10.60
   8  19   0   16.50   15.40
   0 -20   0   31.70    8.40
   0 -20   0   24.90    8.10
   0 -20   0   16.60    8.80
   0 -20   0   23.70    8.10
   0 -20   0   25.50    9.30
   0 -20   0   29.40    7.90
   1 -20   0  548.95   19.70
  -1 -20   0  542.65   22.00
   1 -20   0  539.95   21.10
   1 -20   0  502.95   19.60
  -1 -20   0  540.05   24.30
   1 -20   0  528.75   19.00
  -1 -20   0  501.15   23.00
  -1 -20   0  517.75   22.30
   1 -20   0  519.95   20.10
  -1 -20   0  530.55   21.70
   1 -20   0  525.05   19.30
  -1 -20   0  526.95   21.80
   2 -20   0  108.19   10.60
   2 -20   0  105.89   10.10
   2 -20   0  110.29   11.80
  -2 -20   0  113.49   12.50
  -2 -20   0  147.29   13.40
  -2 -20   0  129.29   12.50
   2 -20   0  119.59   10.50
  -2 -20   0  147.19   12.50
   2 -20   0  122.19   11.30
  -2 -20   0  141.09   12.60
  -2 -20   0  113.19   13.50
   2 -20   0  122.19    9.40
  -3 -20   0 1694.63   48.80
  -3 -20   0 1623.14   48.90
  -3 -20   0 1655.13   49.00
  -3 -20   0 1641.04   48.40
  -3 -20   0 1607.04   48.30
   3 -20   0 1536.95   41.90
  -3 -20   0 1558.24   50.39
  -4 -20   0  185.28   20.20
  -4 -20   0  142.39   16.40
  -4 -20   0  186.18   15.80
  -4 -20   0  186.98   20.50
  -4 -20   0  201.68   16.50
  -4 -20   0  208.78   22.10
   4  20   0  165.78   18.00
  -5 -20   0  838.82   34.60
  -5 -20   0  854.11   34.00
  -5 -20   0  812.52   33.50
  -5 -20   0  831.12   35.30
  -5 -20   0  836.72   33.90
  -5 -20   0  866.41   37.90
   5  20   0  859.51   31.70
   5  20   0  822.32   29.50
  -6 -20   0   74.19   16.00
  -6 -20   0   61.99   15.20
  -6 -20   0   58.69   17.50
  -6 -20   0   66.59   15.60
  -6 -20   0   54.99   14.80
  -6 -20   0   78.59   14.60
   6  20   0   74.39   12.90
   6  20   0   71.39   13.40
  -7 -20   0  389.96   29.00
  -7 -20   0  357.16   28.10
  -7 -20   0  311.27   26.70
   7 -20   0  349.37   14.30
  -7 -20   0  308.27   29.10
  -7 -20   0  358.06   29.50
   7 -20   0  336.37   14.90
  -7 -20   0  356.56   28.00
   7  20   0  270.97   26.30
   7  20   0  362.96   24.80
   8 -20   0   23.00    8.60
  -8 -20   0   30.10   20.10
  -8 -20   0   -3.20   16.20
   8 -20   0   16.10    7.70
  -8 -20   0   20.50   16.90
  -8 -20   0   30.20   16.80
  -8 -20   0   51.29   17.40
  -8 -20   0   -4.00   16.70
   8  20   0   30.40   15.60
   8  20   0   -6.00   11.00
   0 -21   0   -1.40    8.20
   0 -21   0    6.00    8.00
   0 -21   0    5.40    7.60
   0 -21   0    7.80    9.00
   0 -21   0   13.20    8.60
   0 -21   0    7.60    9.60
  -1 -21   0   14.70    8.80
   1 -21   0   14.60    7.70
   1 -21   0    8.60    8.30
  -1 -21   0   23.20    9.30
   1 -21   0   19.10    7.60
  -1 -21   0   25.40   10.80
  -1 -21   0   11.80    9.30
   1 -21   0   17.60    7.40
  -1 -21   0   20.60   10.30
   1 -21   0   19.70    7.40
  -1 -21   0   15.50    9.20
   1 -21   0   15.20    8.70
   2 -21   0   55.79    8.00
   2 -21   0   51.29    6.70
   2 -21   0   47.10    7.40
  -2 -21   0   54.89   11.10
  -2 -21   0   55.09   10.60
  -2 -21   0   56.69   11.00
  -2 -21   0   37.60   11.40
   2 -21   0   41.50    7.90
  -2 -21   0   60.79   11.30
  -2 -21   0   38.80   12.40
   2 -21   0   55.89    7.90
   2 -21   0   66.09    7.10
  -3 -21   0  126.59   14.00
  -3 -21   0  112.89   13.40
  -3 -21   0  120.19   15.60
  -3 -21   0  101.09   13.10
   3 -21   0  110.99    9.90
  -3 -21   0  136.89   13.70
  -3 -21   0  124.39   13.70
  -4 -21   0  -16.00   11.40
  -4 -21   0  -13.20   10.60
  -4 -21   0    0.80   11.20
  -4 -21   0   10.50   12.00
  -4 -21   0    2.80   13.40
  -4 -21   0   14.40   12.00
   4  21   0   -5.70    9.80
  -5 -21   0  218.58   21.00
  -5 -21   0  220.38   23.20
  -5 -21   0  196.68   17.60
  -5 -21   0  213.68   18.90
  -5 -21   0  208.18   18.10
  -5 -21   0  241.38   23.70
   5  21   0  226.28   20.80
  -6 -21   0   56.69   16.00
  -6 -21   0   67.49   15.00
  -6 -21   0   88.09   16.00
  -6 -21   0   97.99   16.40
  -6 -21   0   94.69   16.10
  -6 -21   0   63.89   17.60
   6  21   0   75.59   14.30
   6  21   0   51.49   12.30
  -7 -21   0   33.20   18.90
   7 -21   0   30.50    6.70
  -7 -21   0   36.00   15.40
  -7 -21   0   16.00   16.40
  -7 -21   0   37.80   16.00
  -7 -21   0   30.00   16.80
   7 -21   0   17.20    6.80
  -7 -21   0   60.89   17.30
   7  21   0   26.00   13.90
   7  21   0   40.50   14.90
  -8 -21   0   93.69   23.00
   0 -22   0 1538.65   44.00
   0 -22   0 1500.75   43.30
   0 -22   0 1520.45   44.00
   0 -22   0 1536.55   44.50
   0 -22   0 1544.95   43.90
   0 -22   0 1542.75   45.60
  -1 -22   0  148.09   12.90
  -1 -22   0  159.58   18.00
  -1 -22   0  151.88   16.60
   1 -22   0  140.79   15.10
   1 -22   0  127.49   14.10
   1 -22   0  163.98   14.10
   1 -22   0  140.49   15.80
   1 -22   0  125.49   13.60
  -1 -22   0  141.59   12.60
  -1 -22   0  147.39   16.30
   1 -22   0  167.28   13.80
   2 -22   0 1394.16   38.40
   2 -22   0 1367.56   36.80
  -2 -22   0 1297.87   41.50
   2 -22   0 1344.77   36.40
  -2 -22   0 1362.96   42.30
   2 -22   0 1287.87   37.90
  -2 -22   0 1363.76   44.60
   2 -22   0 1315.27   37.80
  -2 -22   0 1350.76   42.50
  -2 -22   0 1378.66   42.20
  -2 -22   0 1485.15   43.60
   2 -22   0 1300.17   37.50
   3 -22   0  265.07   14.00
  -3 -22   0  248.98   22.00
   3 -22   0  234.58   12.70
  -3 -22   0  275.57   21.30
  -3 -22   0  233.68   23.80
  -3 -22   0  261.27   21.20
  -3 -22   0  286.07   21.10
  -3 -22   0  251.57   21.80
  -4 -22   0  565.34   28.60
   4 -22   0  534.95   17.70
  -4 -22   0  587.64   28.70
  -4 -22   0  589.94   28.10
  -4 -22   0  551.74   27.60
  -4 -22   0  551.84   31.40
  -4 -22   0  577.24   28.60
  -5 -22   0  183.98   18.10
  -5 -22   0  224.98   23.60
  -5 -22   0  209.38   19.60
  -5 -22   0  165.88   19.50
  -5 -22   0  185.48   18.40
  -5 -22   0  165.08   17.30
   5  22   0  180.98   15.80
  -6 -22   0  339.37   27.20
  -6 -22   0  311.07   26.60
  -6 -22   0  315.07   28.00
  -6 -22   0  298.87   31.80
  -6 -22   0  345.67   28.00
  -6 -22   0  332.47   26.70
   6  22   0  250.17   21.10
   6  22   0  256.57   24.00
   7 -22   0   30.30    7.10
  -7 -22   0   42.70   16.00
  -7 -22   0   34.20   16.90
  -7 -22   0   30.60   18.80
  -7 -22   0   36.20   16.90
  -7 -22   0   26.60   16.60
  -7 -22   0    6.50   15.20
   7  22   0   19.10   15.00
   7  22   0   23.30   14.20
   0 -23   0    4.70    8.80
   0 -23   0    9.00    8.80
   0 -23   0    9.60   10.50
   0 -23   0   16.00    9.60
   0 -23   0   30.80    8.90
   0 -23   0   22.40    9.40
   1 -23   0   24.90    8.40
   1 -23   0   11.40    8.30
  -1 -23   0    6.60    9.90
  -1 -23   0   15.10    9.10
   1 -23   0   10.30    8.80
  -1 -23   0   19.00   11.60
  -1 -23   0   25.40   10.50
  -1 -23   0   18.90   10.60
   1 -23   0   18.20    9.70
  -1 -23   0   10.20    9.80
   1 -23   0   14.50    8.30
   1 -23   0    5.40    8.30
  -2 -23   0   10.70   10.90
   2 -23   0   12.70    6.40
  -2 -23   0    6.50   10.90
  -2 -23   0   -4.00   11.70
   2 -23   0    3.90    7.60
  -2 -23   0   17.00   11.80
  -2 -23   0    3.90   10.40
   2 -23   0    8.70    7.40
  -2 -23   0   17.30   10.00
   2 -23   0   39.10    8.30
   2 -23   0    5.20    6.50
   2 -23   0   11.40    7.70
  -3 -23   0    3.30   13.10
   3 -23   0    7.90    6.80
  -3 -23   0   -2.20   11.90
   3 -23   0   -2.20    7.10
  -3 -23   0   12.10   11.80
  -3 -23   0   11.20   11.10
  -3 -23   0   17.00   11.50
  -3 -23   0   -6.10   11.60
  -4 -23   0   44.10   14.20
  -4 -23   0   49.30   13.20
   4 -23   0   28.20    6.60
  -4 -23   0   45.50   13.30
  -4 -23   0   30.70   13.20
  -4 -23   0   39.80   15.40
  -4 -23   0   30.70   13.20
  -5 -23   0   25.60   13.70
  -5 -23   0   15.60   14.00
   5 -23   0   37.00    6.50
  -5 -23   0   10.50   14.10
  -5 -23   0    5.90   15.70
  -5 -23   0   35.20   14.10
  -5 -23   0   30.60   14.00
   5  23   0   29.40   12.00
  -6 -23   0  182.38   19.10
  -6 -23   0  148.59   18.90
  -6 -23   0  148.89   18.80
   6 -23   0  138.69   11.10
  -6 -23   0  143.89   20.60
  -6 -23   0  194.78   19.50
  -6 -23   0  157.48   19.10
   6  23   0  169.08   16.90
   0 -24   0  657.83   25.80
   0 -24   0  695.33   25.40
   0 -24   0  703.03   28.20
   0 -24   0  727.03   27.10
   0 -24   0  706.03   26.30
   0 -24   0  698.43   26.50
  -1 -24   0  214.38   19.90
   1 -24   0  235.38   17.60
  -1 -24   0  221.08   21.60
   1 -24   0  212.98   16.90
  -1 -24   0  225.48   19.20
   1 -24   0  205.38   15.10
  -1 -24   0  211.18   19.30
   1 -24   0  177.68   16.20
   1 -24   0  231.68   16.50
  -1 -24   0  226.88   19.10
   1 -24   0  206.78   15.70
  -1 -24   0  210.08   17.80
   2 -24   0  659.83   23.80
  -2 -24   0  699.73   28.40
   2 -24   0  672.53   23.90
   2 -24   0  694.43   24.40
  -2 -24   0  747.83   29.20
  -2 -24   0  740.33   32.10
  -2 -24   0  684.53   29.30
   2 -24   0  712.13   22.30
   2 -24   0  672.03   23.70
  -2 -24   0  720.13   30.90
  -2 -24   0  688.03   29.20
  -3 -24   0  218.18   22.70
  -3 -24   0  211.78   22.80
   3 -24   0  246.78   14.20
  -3 -24   0  247.98   25.70
  -3 -24   0  212.88   22.20
  -3 -24   0  264.67   22.70
  -3 -24   0  252.87   22.20
   3 -24   0  215.58   14.50
  -4 -24   0  737.73   32.60
  -4 -24   0  712.83   32.70
  -4 -24   0  782.02   32.50
  -4 -24   0  739.63   33.00
   4 -24   0  698.13   23.00
  -4 -24   0  750.12   33.30
  -4 -24   0  743.33   36.00
   5 -24   0  122.79   11.00
  -5 -24   0  115.29   16.90
  -5 -24   0  119.19   17.30
  -5 -24   0  109.79   17.10
  -5 -24   0  129.79   17.50
  -5 -24   0  139.69   20.20
  -5 -24   0  112.89   16.60
  -6 -24   0  544.75   33.50
  -6 -24   0  530.95   32.80
  -6 -24   0  523.55   32.50
   6 -24   0  444.26   17.70
  -6 -24   0  517.95   37.90
  -6 -24   0  528.05   32.60
  -6 -24   0  510.95   33.00
   6  24   0  531.85   28.50
   0 -25   0   -4.40   10.60
   0 -25   0   11.20    9.10
   0 -25   0   12.10    9.80
   0 -25   0   14.70    9.80
   0 -25   0   14.70    9.40
   0 -25   0    9.30   10.60
   1 -25   0  125.59   11.60
  -1 -25   0   95.99   13.20
  -1 -25   0  123.79   13.40
   1 -25   0  108.89   10.30
   1 -25   0  101.89   11.40
   1 -25   0  142.49   11.60
  -1 -25   0  120.09   12.00
  -1 -25   0  114.59   13.50
  -1 -25   0  104.09   14.70
   1 -25   0  114.99   12.20
   1 -25   0   88.39   11.50
  -1 -25   0   97.79   13.40
  -2 -25   0   29.20   13.70
   2 -25   0   18.70    8.50
  -2 -25   0   47.80   13.50
  -2 -25   0   18.90   10.90
   2 -25   0   22.30    8.90
   2 -25   0   15.70    8.20
   2 -25   0   29.20    8.40
  -2 -25   0   42.10   12.40
  -2 -25   0    9.80   11.90
  -2 -25   0    3.70   12.30
  -3 -25   0   37.40   13.10
  -3 -25   0   35.00   14.40
  -3 -25   0   43.30   13.50
  -3 -25   0   25.00   11.90
  -3 -25   0   56.59   13.90
   3 -25   0   38.30    8.70
  -3 -25   0   42.70   13.50
   3 -25   0   43.00    8.60
  -4 -25   0  153.08   17.10
  -4 -25   0  148.59   19.70
   4 -25   0  112.29   12.40
  -4 -25   0  126.49   16.60
  -4 -25   0  127.49   16.20
  -4 -25   0  146.19   17.10
  -4 -25   0  140.59   16.60
   4 -25   0  141.39   13.50
  -5 -25   0   62.59   16.20
  -5 -25   0   36.30   15.20
   5 -25   0   34.50    7.50
  -5 -25   0   25.90   15.00
  -5 -25   0   64.59   15.80
  -5 -25   0   45.10   17.20
  -5 -25   0   52.29   15.50
   0 -26   0  328.67   21.10
   0 -26   0  305.87   21.40
   0 -26   0  352.56   19.20
   0 -26   0  260.97   19.20
   0 -26   0  300.17   22.10
   0 -26   0  323.17   20.50
   1 -26   0  533.05   21.90
   1 -26   0  527.25   21.00
  -1 -26   0  531.25   27.80
  -1 -26   0  508.75   25.70
  -1 -26   0  520.35   26.10
   1 -26   0  498.15   22.60
  -1 -26   0  507.35   23.70
  -1 -26   0  563.24   25.70
   1 -26   0  537.55   24.30
   1 -26   0  545.75   23.70
  -1 -26   0  514.45   26.30
   1 -26   0  523.35   22.80
  -2 -26   0   53.09   13.20
  -2 -26   0   33.80   13.40
  -2 -26   0   17.60   11.50
  -2 -26   0   42.80   12.90
  -2 -26   0   31.40   12.60
  -2 -26   0   33.50   13.90
   2 -26   0   55.09   10.10
   2 -26   0   47.90    9.30
   2 -26   0   44.30    8.90
   2 -26   0   44.50    9.40
  -3 -26   0  718.03   32.30
   3 -26   0  638.44   24.10
  -3 -26   0  687.73   34.50
   3 -26   0  664.33   24.20
  -3 -26   0  718.73   32.60
  -3 -26   0  701.83   32.10
  -3 -26   0  715.53   32.80
  -3 -26   0  695.33   30.80
  -4 -26   0   35.00   16.30
   4 -26   0   31.80    8.50
  -4 -26   0   11.60   14.30
  -4 -26   0   23.10   13.60
  -4 -26   0   29.10   14.90
   4 -26   0   52.29    8.60
  -4 -26   0   36.10   14.80
  -4 -26   0   37.90   14.80
   0 -27   0   11.60   11.30
   0 -27   0   -2.60   10.60
   0 -27   0    9.40   11.30
   0 -27   0    6.50    9.70
   0 -27   0    3.70   11.70
   0 -27   0   -7.70   10.00
  -1 -27   0   38.60   13.30
  -1 -27   0   28.20   12.10
   1 -27   0   19.00    9.60
   1 -27   0   30.80   10.40
  -1 -27   0   11.40   12.10
  -1 -27   0   14.60   10.20
   1 -27   0   28.10    8.70
   1 -27   0   23.50   11.00
   1 -27   0   26.80   10.20
  -1 -27   0   26.30   12.40
  -1 -27   0   35.80   12.00
   1 -27   0    9.90   10.70
  -2 -27   0  -19.90   12.00
  -2 -27   0   -5.20   11.10
  -2 -27   0   -0.60   12.70
   2 -27   0   -0.90    9.50
  -2 -27   0   19.00   14.30
  -2 -27   0   -1.90   12.60
  -2 -27   0   -6.10   12.20
   2 -27   0   -0.90    9.00
   2 -27   0    3.30    9.30
   2 -27   0    7.20    8.60
 -12   0   1    1.20   16.70
 -12   0   1   -6.00   14.10
 -12   0   1    8.00   15.10
 -12   0   1   -5.60   14.00
  12   0  -1   20.10   14.90
  12   0  -1  -20.70   17.50
  12   0  -1   -2.50   16.20
 -12   0   1  -22.00   12.50
 -12   0   1   -5.30   13.60
  12   0  -1   17.80   17.00
 -11   0   1  436.56   27.60
 -11   0   1  502.15   24.30
  11   0  -1  482.05   27.80
  11   0  -1  510.25   33.20
  11   0  -1  458.85   31.10
 -11   0   1  442.06   32.40
 -11   0   1  481.15   31.10
  11   0  -1  477.65   28.80
 -11   0   1  460.35   25.50
 -10   0   1   21.40   12.00
 -10   0   1   -7.30   14.30
 -10   0   1    1.20   10.10
 -10   0   1    1.00   12.20
  10   0  -1   -1.30   13.10
  10   0  -1   18.20   14.20
  10   0  -1    1.40   12.20
  10   0  -1   -2.70   12.60
 -10   0   1   16.90   13.50
  -9   0   1  114.59   14.10
  -9   0   1  108.79   12.80
   9   0  -1  104.99   14.40
  -9   0   1   99.99   11.80
  -9   0   1  101.99   12.60
  -9   0   1  161.58   15.90
   9   0  -1  109.99   12.80
   9   0  -1   88.59   12.50
   9   0  -1   88.89   12.40
   8   0  -1    9.90    9.00
  -8   0   1    0.20   10.90
  -8   0   1   -2.80    8.00
   8   0  -1   -8.60    9.50
  -8   0   1   -1.50    7.70
  -8   0   1    4.00    9.60
   8   0  -1    5.80    8.70
   8   0  -1    2.80    9.20
  -8   0   1   -2.40    8.60
  -8   0   1   -1.60    8.20
  -7   0   1  689.33   23.60
  -7   0   1  665.43   22.60
   7   0  -1  645.74   23.90
   7   0  -1  665.23   25.40
   7   0  -1  662.33   23.70
  -7   0   1  675.43   23.30
  -7   0   1  639.34   23.70
  -7   0   1  653.73   26.20
   7   0  -1  627.44   24.50
   6   0  -1    2.80    7.70
   6   0  -1   -1.20    7.30
  -6   0   1   -8.60    7.10
  -6   0   1   -5.50    7.30
  -6   0   1    5.10    7.20
   6   0  -1   -3.30    8.70
   6   0  -1    1.80    8.00
  -6   0   1   10.90    7.00
   5   0  -1 1624.24   43.90
  -5   0   1 1559.04   43.00
  -5   0   1 1542.95   42.50
  -5   0   1 1569.94   43.50
   5   0  -1 1561.04   43.30
  -5   0   1 1565.24   43.20
   5   0  -1 1562.54   44.20
   5   0  -1 1595.14   43.30
   4   0  -1    2.80    4.60
   4   0  -1    9.90    5.00
   4   0  -1    3.20    4.50
  -4   0   1    3.50    4.20
  -4   0   1    0.40    4.20
   4   0  -1    7.90    4.40
  -4   0   1    3.90    4.50
  -4   0   1    5.50    4.60
  -3   0   1 3512.85   88.29
  -3   0   1 3532.85   88.49
   3   0  -1 3528.15   88.49
   3   0  -1 3579.04   88.69
  -3   0   1 3561.34   88.09
   3   0  -1 3539.85   88.39
   3   0  -1 3573.34   88.19
  -3   0   1 3515.35   88.19
   2   0  -1    3.00    3.50
   2   0  -1    5.60    3.30
   2   0  -1    2.90    3.40
  -2   0   1    2.40    3.40
  -2   0   1    5.10    3.40
   2   0  -1    5.40    3.50
  -2   0   1    3.50    3.40
  -2   0   1    4.30    3.20
  -1   0   1   -0.10    1.00
   1   0  -1   -0.30    0.90
  -2   0  -1   -1.40    4.10
   2   0   1    0.00    3.60
  -2   0  -1    1.10    3.60
   2   0   1   -1.30    4.30
   2   0   1    1.70    4.10
  -2   0  -1    3.00    4.20
  -2   0  -1    1.40    4.00
  -2   0  -1    3.60    4.20
  -2   0  -1    3.30    3.60
   2   0   1    9.10    4.30
   2   0   1    0.40    4.50
   2   0   1    4.00    3.90
  -3   0  -1 1664.73   44.00
   3   0   1 1696.03   44.30
  -3   0  -1 1643.54   43.80
  -3   0  -1 1716.13   43.50
  -3   0  -1 1701.93   44.10
   3   0   1 1685.43   43.60
  -3   0  -1 1665.13   43.30
   3   0   1 1746.93   43.70
   3   0   1 1714.93   44.60
   3   0   1 1689.03   44.20
  -3   0  -1 1680.33   44.60
  -4   0  -1    4.60    6.70
   4   0   1   -9.60    5.70
  -4   0  -1   -3.00    4.90
  -4   0  -1    2.20    5.60
   4   0   1   -4.10    6.00
   4   0   1   -5.20    5.30
   4   0   1    4.20    5.20
  -4   0  -1   -3.50    5.10
  -4   0  -1   -2.20    5.80
  -4   0  -1    4.40    5.40
  -5   0  -1  983.40   30.60
  -5   0  -1  940.01   30.10
  -5   0  -1  957.30   29.90
  -5   0  -1  946.41   29.20
   5   0   1  931.91   30.90
  -5   0  -1  967.10   28.70
  -5   0  -1  962.80   32.10
   5   0   1  975.00   31.40
   5   0   1  982.70   29.70
   5   0   1  997.80   29.90
  -6   0  -1    3.60    9.00
   6   0   1   -1.50    7.60
  -6   0  -1   -4.40    7.00
  -6   0  -1   -2.60    6.70
   6   0   1    2.60    8.00
  -6   0  -1  -10.80    7.90
   6   0   1    4.30    7.30
  -6   0  -1    3.10    7.30
   6   0   1    8.80    8.80
  -6   0  -1    8.90    7.90
   7   0   1 1343.97   40.20
  -7   0  -1 1311.67   42.00
   7   0   1 1313.07   41.30
  -7   0  -1 1421.06   40.00
   7   0   1 1347.37   39.80
  -7   0  -1 1330.17   40.70
  -7   0  -1 1355.36   39.10
   7   0   1 1339.57   41.70
  -7   0  -1 1420.76   40.50
  -7   0  -1 1376.96   38.50
   8   0   1    7.90   10.50
  -8   0  -1   -5.40    8.70
   8   0   1   -5.40    9.20
  -8   0  -1   -0.10    8.00
  -8   0  -1    0.90   11.00
  -8   0  -1   -4.00   10.00
  -8   0  -1  -11.30    8.70
   8   0   1   -1.90   10.70
   8   0   1   -0.20    9.80
  -8   0  -1   -2.50    8.60
   9   0   1   32.00   11.60
   9   0   1    6.90   12.40
  -9   0  -1    4.20   10.40
  -9   0  -1   26.70   10.60
  -9   0  -1   10.10   11.00
  -9   0  -1   29.80   14.20
  -9   0  -1    7.80    9.40
  -9   0  -1   11.70   12.10
   9   0   1   11.50   13.30
   9   0   1   23.90   12.40
  10   0   1  -20.20   13.40
  10   0   1   -0.60   12.50
 -10   0  -1   -0.30   10.30
  10   0   1   14.20   13.20
  10   0   1   -9.60   14.40
 -10   0  -1   -8.80   11.50
 -10   0  -1    7.00    9.50
 -10   0  -1   -6.10   15.20
 -10   0  -1   -2.60   13.20
 -10   0  -1    7.80   10.70
 -11   0  -1  344.97   22.40
  11   0   1  400.66   31.60
  11   0   1  382.86   31.20
 -11   0  -1  394.26   26.70
 -11   0  -1  351.86   24.10
  11   0   1  341.47   26.50
 -11   0  -1  395.96   29.90
  11   0   1  429.16   29.40
 -11   0  -1  367.36   27.20
  12   0   1   26.90   19.20
  12   0   1  -15.60   15.50
 -12   0  -1  -18.10   14.50
 -12   0  -1  -46.90   14.90
  12   0   1   -3.10   16.30
 -12   0  -1   24.60   17.60
 -12   0  -1  -13.50   14.40
 -12   0  -1  -17.40   13.30
 -12   0  -1  -10.50   13.30
  12   0   1   -6.90   17.50
 -12  -1   1   33.10   15.20
 -12  -1   1    8.70   14.10
  12  -1  -1   25.20   18.30
 -12  -1   1   -3.70   14.20
 -12  -1   1   35.20   14.20
 -12  -1   1    7.30   16.70
  12  -1  -1   48.40   16.70
  12  -1  -1    3.30   17.00
  12  -1  -1    8.50   15.10
 -12  -1   1  -19.60   15.60
 -12   1   1    6.30   15.10
  12   1  -1  -10.30   16.50
  12   1  -1    4.70   18.20
  12   1  -1   15.20   15.30
 -12   1   1    7.00   14.10
 -12   1   1   38.80   16.80
 -12   1   1   -9.00   12.80
 -12   1   1   26.80   12.70
 -12   1   1   28.60   15.20
  12   1  -1   16.90   16.50
  11  -1  -1  735.53   36.60
 -11  -1   1  769.12   32.30
 -11  -1   1  761.82   31.10
  11  -1  -1  820.92   33.90
  11  -1  -1  785.22   34.30
 -11  -1   1  716.83   36.40
  11  -1  -1  783.62   37.80
 -11  -1   1  761.12   34.10
 -11  -1   1  752.52   38.40
 -11   1   1  806.42   31.10
  11   1  -1  736.63   34.60
  11   1  -1  820.72   39.00
 -11   1   1  826.02   36.00
  11   1  -1  737.83   37.00
 -11   1   1  671.33   35.30
  11   1  -1  794.82   34.30
 -11   1   1  798.02   29.20
  10  -1  -1  350.06   27.30
 -10  -1   1  335.97   24.70
  10  -1  -1  332.17   26.20
 -10  -1   1  358.46   26.90
 -10  -1   1  378.36   21.30
  10  -1  -1  347.37   24.10
  10  -1  -1  361.16   23.90
 -10  -1   1  368.16   23.40
 -10  -1   1  400.56   30.00
  10   1  -1  370.46   25.20
 -10   1   1  348.17   21.70
  10   1  -1  383.76   24.40
 -10   1   1  377.26   20.60
 -10   1   1  309.97   20.50
  10   1  -1  291.47   28.40
  10   1  -1  422.36   28.00
 -10   1   1  338.77   26.00
 -10   1   1  285.77   27.00
  -9  -1   1 3179.58   89.79
  -9  -1   1 3295.37   89.29
   9  -1  -1 3421.86   90.19
   9  -1  -1 3344.87   88.79
  -9  -1   1 3304.07   88.29
   9  -1  -1 3447.26   89.29
  -9  -1   1 3142.89   91.19
   9  -1  -1 3375.26   90.69
  -9  -1   1 3298.27   88.79
  -9  -1   1 3297.97   87.39
  -9   1   1 3288.07   90.99
  -9   1   1 3336.77   89.69
  -9   1   1 3363.06   88.89
  -9   1   1 3350.86   86.79
  -9   1   1 3398.06   87.39
   9   1  -1 3319.17   89.19
   9   1  -1 3253.87   90.99
   9   1  -1 3235.38   90.19
   9   1  -1 3315.47   89.29
  -9   1   1 3378.06   88.39
  -8  -1   1   78.79   11.60
   8  -1  -1   72.29   10.90
  -8  -1   1   72.99   10.20
  -8  -1   1   82.29   13.20
   8  -1  -1   73.39   10.70
   8  -1  -1   72.39   10.30
  -8  -1   1   55.89   10.20
   8  -1  -1   82.59   11.40
  -8  -1   1   80.89    9.80
  -8  -1   1   76.39   10.70
  -8   1   1   86.09   11.50
   8   1  -1   82.69   10.70
  -8   1   1   72.09   12.20
   8   1  -1   93.49   11.40
  -8   1   1   59.89    9.90
  -8   1   1   61.49    9.90
   8   1  -1   74.79   11.30
  -8   1   1   64.29    9.50
  -8   1   1   66.69    9.10
   8   1  -1   74.19   12.00
  -7  -1   1 2590.84   70.49
   7  -1  -1 2713.63   71.69
  -7  -1   1 2692.43   70.29
   7  -1  -1 2687.13   70.29
  -7  -1   1 2617.24   70.89
   7  -1  -1 2664.83   70.39
   7  -1  -1 2670.73   71.09
  -7  -1   1 2604.34   72.49
  -7  -1   1 2667.73   69.79
  -7   1   1 2680.13   70.49
  -7   1   1 2636.64   71.99
  -7   1   1 2614.54   70.09
   7   1  -1 2622.04   70.59
   7   1  -1 2595.84   71.39
   7   1  -1 2678.23   72.09
   7   1  -1 2618.44   70.69
  -7   1   1 2741.73   69.69
  -7   1   1 2677.03   69.09
  -6  -1   1  272.37   15.70
  -6  -1   1  282.17   15.60
   6  -1  -1  278.87   15.60
   6  -1  -1  278.07   15.70
  -6  -1   1  276.07   16.50
  -6  -1   1  271.37   15.20
   6  -1  -1  282.67   16.70
   6  -1  -1  264.27   17.20
   6   1  -1  271.17   16.30
  -6   1   1  267.87   14.10
   6   1  -1  288.57   15.80
  -6   1   1  255.87   15.00
  -6   1   1  286.07   14.80
   6   1  -1  286.77   17.20
  -6   1   1  258.77   15.30
   6   1  -1  285.07   18.10
   5  -1  -1   69.49    9.10
  -5  -1   1   96.19    9.00
   5  -1  -1   81.29    8.70
  -5  -1   1   85.19    9.40
   5  -1  -1   76.09    8.80
  -5  -1   1   81.59    8.90
   5  -1  -1   71.89    9.40
  -5  -1   1   76.69    8.90
   5   1  -1   77.49    8.90
   5   1  -1   91.19   10.50
   5   1  -1   84.09    9.60
   5   1  -1   72.99    9.00
  -5   1   1   65.99    8.60
  -5   1   1   79.39    8.40
  -5   1   1   77.59    8.00
  -5   1   1   78.59    8.40
  -4  -1   1  164.78   10.20
   4  -1  -1  160.28    9.50
   4  -1  -1  152.18   10.00
  -4  -1   1  159.38    9.70
  -4  -1   1  161.28    9.20
   4  -1  -1  158.58    9.10
  -4  -1   1  160.28    9.70
   4  -1  -1  172.68    9.10
  -4   1   1  156.98    9.00
   4   1  -1  170.68    9.80
  -4   1   1  155.18    8.80
   4   1  -1  161.08   10.60
   4   1  -1  160.78    9.70
  -4   1   1  161.58    9.30
   4   1  -1  166.08   10.30
  -4   1   1  151.28    8.50
   3  -1  -1 1863.11   47.50
  -3  -1   1 1836.02   47.30
   3  -1  -1 1877.71   47.00
  -3  -1   1 1898.21   47.80
   3  -1  -1 1860.01   47.30
   3  -1  -1 1837.02   47.10
  -3  -1   1 1851.71   47.50
  -3  -1   1 1798.82   47.50
   3   1  -1 1850.21   47.40
   3   1  -1 1880.81   47.90
  -3   1   1 1855.21   47.00
   3   1  -1 1844.72   47.60
   3   1  -1 1828.62   47.50
  -3   1   1 1826.02   47.10
  -3   1   1 1844.22   46.80
  -3   1   1 1813.42   47.30
   2  -1  -1   50.59    5.50
  -2  -1   1   47.30    4.70
   2  -1  -1   45.60    4.10
  -2  -1   1   33.10    4.00
  -2  -1   1   41.00    4.40
   2  -1  -1   41.80    4.00
  -2  -1   1   36.10    4.20
   2  -1  -1   39.30    3.80
   2   1  -1   38.60    4.20
  -2   1   1   37.90    3.70
  -2   1   1   43.00    4.10
   2   1  -1   41.60    4.50
   2   1  -1   39.90    4.20
  -2   1   1   35.20    3.70
   2   1  -1   53.79    4.60
  -2   1   1   46.40    4.00
  -1  -1  -1   83.49    5.10
   1  -1   1   81.29    7.20
   1  -1   1   71.59    3.60
   1  -1   1   86.29    4.20
  -1  -1  -1   73.09    4.50
   1  -1   1   65.99    4.60
   1  -1   1   71.39    3.60
  -1  -1  -1   68.59    4.20
   1   1   1   71.69    4.40
   1   1   1   72.69    4.30
   1   1   1   69.59    4.60
   1   1   1   55.29    4.50
  -1   1  -1   68.29    4.10
   1   1   1   72.19    5.90
  -1   1  -1   68.79    3.20
  -2  -1  -1   82.29    7.20
   2  -1   1  100.49    7.40
  -2  -1  -1   87.69    8.20
   2  -1   1   77.69    6.20
  -2  -1  -1   95.89    8.60
   2  -1   1   98.29    8.10
   2  -1   1   96.99    7.60
  -2  -1  -1   99.79    8.10
  -2  -1  -1   95.79    9.20
   2  -1   1   89.49    6.30
   2  -1   1   86.49    7.20
  -2  -1  -1   93.09    7.30
   2   1   1  100.59    9.00
   2   1   1   99.39    7.30
   2   1   1   98.59    8.80
  -2   1  -1   87.39    7.10
   2   1   1   91.59    8.00
  -2   1  -1   82.29    7.10
  -2   1  -1   74.19    7.00
   2   1   1   91.39    8.40
  -2   1  -1   90.69    6.10
  -2   1  -1   84.29    5.80
   2   1   1   92.39    7.60
   3  -1   1  810.62   23.00
   3  -1   1  814.92   22.20
  -3  -1  -1  787.82   23.10
  -3  -1  -1  804.22   23.90
   3  -1   1  810.12   22.20
   3  -1   1  810.82   22.80
  -3  -1  -1  787.32   23.20
  -3  -1  -1  822.92   22.60
  -3  -1  -1  789.22   22.60
   3  -1   1  831.72   23.30
  -3  -1  -1  833.42   23.40
  -3   1  -1  803.32   22.00
   3   1   1  799.52   23.40
  -3   1  -1  815.82   22.50
   3   1   1  813.52   23.80
  -3   1  -1  804.72   22.70
   3   1   1  820.12   22.80
   3   1   1  804.02   22.70
   3   1   1  788.12   23.50
  -3   1  -1  794.92   22.70
  -3   1  -1  796.12   21.70
  -4  -1  -1    0.70    5.60
  -4  -1  -1    5.10    6.00
   4  -1   1   -0.90    5.10
  -4  -1  -1    3.40    7.10
   4  -1   1    1.00    5.70
  -4  -1  -1    1.00    5.90
  -4  -1  -1   -1.80    5.20
   4  -1   1    0.90    4.90
   4  -1   1    1.90    6.00
  -4  -1  -1    5.20    5.80
   4   1   1   -3.30    6.30
   4   1   1   -3.10    5.50
  -4   1  -1    8.80    5.20
  -4   1  -1    0.70    4.50
  -4   1  -1   -1.20    5.40
  -4   1  -1    1.30    4.90
  -4   1  -1   -5.80    6.20
   4   1   1   -6.20    5.50
   4   1   1   -2.80    6.20
  -4   1  -1   -4.90    5.20
   5  -1   1  681.73   24.60
  -5  -1  -1  660.83   23.00
  -5  -1  -1  661.23   23.40
   5  -1   1  706.63   25.20
  -5  -1  -1  687.13   24.90
  -5  -1  -1  705.43   24.60
  -5  -1  -1  662.03   26.20
   5  -1   1  678.33   22.90
  -5  -1  -1  653.53   23.80
   5  -1   1  680.73   23.00
  -5   1  -1  678.43   25.50
   5   1   1  664.93   23.50
  -5   1  -1  667.33   23.20
   5   1   1  636.24   23.70
   5   1   1  666.23   25.10
  -5   1  -1  690.93   21.80
   5   1   1  646.44   25.60
  -5   1  -1  689.53   22.30
  -5   1  -1  671.43   23.00
  -5   1  -1  660.93   23.80
  -6  -1  -1   14.40    8.10
  -6  -1  -1   11.00    7.80
  -6  -1  -1   15.70    7.70
  -6  -1  -1    5.30    9.40
   6  -1   1   12.90    7.30
   6  -1   1   15.20    7.70
   6  -1   1    5.40    8.40
  -6  -1  -1   17.40    7.20
  -6  -1  -1    7.10    8.50
   6  -1   1    6.00    8.00
  -6   1  -1   13.90    7.30
  -6   1  -1   14.80    7.20
   6   1   1    7.50    7.90
   6   1   1   13.10    9.10
   6   1   1   -3.60    8.60
  -6   1  -1   10.20    6.90
  -6   1  -1   13.20    8.90
  -6   1  -1    4.40    7.90
   6   1   1   13.50    7.60
  -6   1  -1   13.20    6.50
  -7  -1  -1  191.68   18.50
  -7  -1  -1  176.08   14.80
  -7  -1  -1  194.58   16.90
  -7  -1  -1  171.68   15.60
  -7  -1  -1  197.18   13.80
   7  -1   1  187.08   14.10
   7  -1   1  181.68   16.80
  -7  -1  -1  175.98   14.80
   7  -1   1  186.48   14.90
   7  -1   1  175.38   16.70
  -7   1  -1  186.58   12.70
   7   1   1  161.08   17.30
   7   1   1  174.78   16.70
  -7   1  -1  188.18   15.90
   7   1   1  171.58   15.30
  -7   1  -1  195.08   17.40
  -7   1  -1  200.78   14.30
  -7   1  -1  182.48   14.50
  -7   1  -1  196.38   13.90
   7   1   1  186.38   14.90
   8  -1   1  440.76   21.90
  -8  -1  -1  428.26   23.50
  -8  -1  -1  439.26   19.80
  -8  -1  -1  436.86   25.70
  -8  -1  -1  467.65   21.10
  -8  -1  -1  452.25   21.90
   8  -1   1  431.16   23.70
  -8  -1  -1  459.65   22.50
   8  -1   1  420.56   24.20
   8  -1   1  419.36   20.90
  -8   1  -1  446.56   21.30
   8   1   1  431.56   22.00
   8   1   1  467.15   24.40
  -8   1  -1  432.96   24.30
  -8   1  -1  415.66   19.70
  -8   1  -1  417.76   18.50
  -8   1  -1  406.16   22.50
   8   1   1  467.15   25.10
  -8   1  -1  385.26   21.20
   8   1   1  458.95   22.50
   9  -1   1  245.58   20.50
  -9  -1  -1  258.17   25.10
  -9  -1  -1  188.98   16.80
   9  -1   1  233.08   23.60
  -9  -1  -1  217.08   20.70
  -9  -1  -1  255.17   18.40
   9  -1   1  210.88   23.00
   9  -1   1  213.08   20.40
  -9  -1  -1  257.57   23.40
  -9  -1  -1  239.28   19.50
  -9   1  -1  248.98   18.80
   9   1   1  215.78   20.10
  -9   1  -1  225.08   16.50
  -9   1  -1  227.48   19.30
   9   1   1  247.08   24.50
   9   1   1  256.47   23.70
  -9   1  -1  226.88   24.20
  -9   1  -1  240.68   22.40
  -9   1  -1  189.68   19.60
   9   1   1  211.18   21.30
  10  -1   1   56.39   14.30
 -10  -1  -1   65.59   12.10
 -10  -1  -1   65.19   13.80
 -10  -1  -1   33.70   16.30
  10  -1   1   48.90   13.40
 -10  -1  -1   47.50   14.50
  10  -1   1   65.29   16.20
 -10  -1  -1   63.69   13.40
  10  -1   1   56.29   15.10
  10   1   1   53.59   14.00
 -10   1  -1   47.60   10.60
  10   1   1   74.09   16.80
  10   1   1   67.19   16.50
 -10   1  -1   46.50   14.60
 -10   1  -1   38.80   15.40
  10   1   1   53.69   14.80
 -10   1  -1   44.20   12.20
  11  -1   1  240.78   22.70
  11  -1   1  233.48   25.90
 -11  -1  -1  193.08   26.00
  11  -1   1  206.18   20.90
 -11  -1  -1  269.77   24.50
 -11  -1  -1  271.37   22.00
 -11  -1  -1  226.08   25.60
 -11  -1  -1  223.38   20.40
  11  -1   1  227.98   25.00
  11   1   1  251.67   26.60
 -11   1  -1  272.37   21.80
 -11   1  -1  273.87   24.70
  11   1   1  230.58   24.90
 -11   1  -1  244.08   27.20
 -11   1  -1  199.18   21.50
  11   1   1  191.18   21.80
  11   1   1  265.47   22.80
 -11   1  -1  251.77   19.80
 -12  -1  -1   -9.00   14.70
  12  -1   1   11.10   15.90
 -12  -1  -1   21.50   15.60
 -12  -1  -1    2.30   16.50
  12  -1   1   -8.40   17.80
 -12  -1  -1   15.20   16.10
  12  -1   1   20.80   18.30
 -12  -1  -1   23.80   19.00
 -12  -1  -1    5.10   13.50
  12  -1   1   54.89   17.40
 -12   1  -1    4.20   14.30
  12   1   1   -4.30   16.50
 -12   1  -1   -7.80   13.90
  12   1   1   -1.10   18.20
 -12   1  -1   32.00   16.50
 -12   1  -1   -0.80   17.30
 -12   1  -1    4.10   14.90
 -12   1  -1   15.10   10.80
  12   1   1   32.50   18.60
  12   1   1   49.99   18.30
 -12  -2   1   35.10   14.70
 -12  -2   1   -0.50   15.10
 -12  -2   1   15.90   15.70
 -12  -2   1   35.50   15.80
  12  -2  -1   34.10   15.00
 -12  -2   1   25.90   17.50
  12  -2  -1   18.90   17.60
 -12  -2   1   18.30   16.30
  12  -2  -1    5.50   16.10
  12  -2  -1   34.30   17.50
 -12   2   1   20.80   14.60
  12   2  -1    7.80   17.60
  12   2  -1   34.00   19.10
 -12   2   1   24.20   12.50
  12   2  -1   38.30   16.60
 -12   2   1   48.00   16.70
 -12   2   1    6.40   14.40
 -12   2   1   26.50   13.30
 -12   2   1    5.20   11.40
  12   2  -1   20.90   15.20
  11  -2  -1   61.59   16.60
 -11  -2   1   31.60   14.50
  11  -2  -1   42.40   13.50
 -11  -2   1   49.00   13.10
  11  -2  -1   68.09   15.80
  11  -2  -1   63.89   14.70
 -11  -2   1   53.69   14.80
 -11  -2   1   39.70   16.20
 -11  -2   1   39.50   17.50
 -11   2   1   30.30   21.90
  11   2  -1   27.50   16.10
 -11   2   1   48.70   11.30
 -11   2   1   48.10   15.00
 -11   2   1   54.29   12.40
 -11   2   1    2.30   11.40
  11   2  -1   28.70   14.00
  11   2  -1   42.10   16.10
  11   2  -1   41.10   15.10
 -10  -2   1  410.06   26.50
 -10  -2   1  417.46   23.40
 -10  -2   1  441.46   24.60
  10  -2  -1  430.66   25.30
  10  -2  -1  444.46   24.70
  10  -2  -1  425.56   27.00
  10  -2  -1  365.96   27.50
 -10  -2   1  432.96   28.70
 -10  -2   1  407.56   30.20
 -10   2   1  407.36   26.60
  10   2  -1  427.26   28.50
 -10   2   1  374.16   22.30
 -10   2   1  396.06   28.40
  10   2  -1  439.06   29.60
 -10   2   1  434.16   22.00
 -10   2   1  440.76   20.90
  10   2  -1  434.96   25.40
  10   2  -1  420.16   26.70
  -9  -2   1   78.79   11.80
  -9  -2   1   63.49   14.80
   9  -2  -1   67.89   11.70
  -9  -2   1   77.49   13.90
  -9  -2   1   61.09   10.80
   9  -2  -1   85.39   12.50
   9  -2  -1   63.69   11.60
   9  -2  -1   57.69   13.10
  -9  -2   1   60.09   12.30
  -9  -2   1   58.19   12.00
  -9   2   1   63.89   10.90
  -9   2   1   62.39   11.30
   9   2  -1   64.79   12.70
  -9   2   1   55.79    9.70
  -9   2   1   56.39   13.50
   9   2  -1   53.99   12.10
  -9   2   1   43.00   10.30
  -9   2   1   59.49   12.60
   9   2  -1   70.39   13.00
   9   2  -1   49.99   13.60
   8  -2  -1   65.29   10.30
   8  -2  -1   48.60   10.80
  -8  -2   1   59.89   12.80
  -8  -2   1   67.69   10.60
   8  -2  -1   61.29    9.80
  -8  -2   1   73.69   10.30
  -8  -2   1   46.00   10.90
  -8  -2   1   57.39   10.90
   8  -2  -1   59.89   10.40
  -8  -2   1   80.09    9.90
   8   2  -1   52.69   10.60
  -8   2   1   61.09    9.30
  -8   2   1   57.49    9.10
  -8   2   1   57.39   11.80
   8   2  -1   63.39   11.80
  -8   2   1   69.29    9.80
   8   2  -1   61.19   10.70
  -8   2   1   48.70   10.20
  -8   2   1   61.39    8.70
   8   2  -1   72.69   11.00
  -7  -2   1  571.34   21.40
  -7  -2   1  574.34   22.30
  -7  -2   1  575.44   22.20
   7  -2  -1  586.44   21.50
  -7  -2   1  553.94   25.10
   7  -2  -1  591.14   23.40
  -7  -2   1  555.44   22.80
   7  -2  -1  576.24   22.60
   7  -2  -1  552.64   21.60
   7   2  -1  567.74   23.70
  -7   2   1  559.04   21.30
  -7   2   1  588.44   19.90
   7   2  -1  571.34   22.60
  -7   2   1  580.64   20.70
  -7   2   1  596.54   21.20
   7   2  -1  568.74   24.20
   7   2  -1  588.24   22.30
  -7   2   1  566.54   24.00
   6  -2  -1  822.82   26.30
  -6  -2   1  842.42   27.30
  -6  -2   1  786.72   27.10
   6  -2  -1  829.22   27.10
  -6  -2   1  809.72   27.80
   6  -2  -1  826.82   26.30
   6  -2  -1  812.12   27.50
  -6  -2   1  848.42   26.60
  -6   2   1  790.62   26.20
  -6   2   1  829.22   25.00
   6   2  -1  826.52   28.00
   6   2  -1  844.42   27.30
   6   2  -1  845.42   27.30
   6   2  -1  830.22   29.00
  -6   2   1  795.52   25.20
  -6   2   1  819.52   25.90
  -5  -2   1  181.88   14.00
   5  -2  -1  180.88   13.30
   5  -2  -1  188.58   14.90
   5  -2  -1  188.28   14.10
   5  -2  -1  203.48   13.20
  -5  -2   1  173.48   15.50
  -5  -2   1  174.98   14.80
  -5  -2   1  183.38   14.80
  -5   2   1  180.48   12.40
   5   2  -1  173.38   15.80
   5   2  -1  162.68   14.60
  -5   2   1  200.48   13.00
   5   2  -1  170.08   16.30
  -5   2   1  182.78   11.90
   5   2  -1  161.98   14.50
  -5   2   1  201.58   13.50
   4  -2  -1 1262.07   34.50
   4  -2  -1 1272.27   34.20
  -4  -2   1 1265.07   34.40
   4  -2  -1 1308.17   33.90
  -4  -2   1 1234.58   34.70
  -4  -2   1 1271.27   35.00
   4  -2  -1 1276.77   34.00
  -4  -2   1 1268.77   34.80
  -4   2   1 1264.17   33.30
  -4   2   1 1254.37   33.50
   4   2  -1 1315.67   35.50
   4   2  -1 1294.07   35.10
   4   2  -1 1279.67   34.70
  -4   2   1 1234.88   33.80
   4   2  -1 1253.87   34.60
  -4   2   1 1220.18   34.00
  -3  -2   1  207.38    9.80
   3  -2  -1  248.48    9.30
  -3  -2   1  218.18    9.80
   3  -2  -1  219.98    8.70
   3  -2  -1  212.88    8.90
  -3  -2   1  206.18    9.30
  -3  -2   1  222.88   10.00
   3  -2  -1  216.38    8.60
  -3   2   1  219.58    8.10
  -3   2   1  215.68    8.20
   3   2  -1  221.88   10.00
  -3   2   1  215.38    8.60
   3   2  -1  220.08    9.50
   3   2  -1  222.38   10.40
  -3   2   1  238.28    8.90
   3   2  -1  227.18    9.70
   2  -2  -1 1821.42   45.00
  -2  -2   1 1805.82   45.70
  -2  -2   1 1802.42   45.60
   2  -2  -1 1756.92   45.20
  -2  -2   1 1792.72   45.80
   2  -2  -1 1753.22   45.00
  -2  -2   1 1822.62   46.00
   2  -2  -1 1771.52   45.10
   2   2  -1 1818.42   46.00
  -2   2   1 1720.23   44.80
  -2   2   1 1761.02   45.10
  -2   2   1 1844.42   44.80
   2   2  -1 1844.42   45.60
   2   2  -1 1834.12   45.70
  -2   2   1 1755.22   45.00
  -1  -2   1 1800.52   46.70
   1  -2  -1 1818.92   46.50
   1  -2  -1 1634.14   46.40
   1  -2  -1 1900.21   46.30
  -1  -2   1 1924.81   46.40
   1  -2  -1 1905.21   46.20
  -1  -2   1 1862.41   46.50
   1   2  -1 1845.22   46.50
  -1   2   1 1965.20   46.30
  -1   2   1 1959.20   46.00
  -1   2   1 1918.31   46.30
   0  -2  -1   -1.00    0.80
  -1  -2  -1 1349.96   34.30
   1  -2   1 1298.67   33.40
   1  -2   1 1539.15   33.70
  -1  -2  -1 1347.67   34.70
  -1  -2  -1 1334.07   34.60
   1  -2   1 1399.46   33.00
  -1  -2  -1 1326.77   34.40
   1  -2   1 1284.77   33.50
  -1   2  -1 1303.37   33.40
  -1   2  -1 1365.66   33.40
   1   2   1 1346.27   34.10
  -1   2  -1 1311.47   33.40
   1   2   1 1294.87   34.30
   1   2   1 1313.17   34.30
   1   2   1 1300.77   34.60
  -2  -2  -1 5500.75  132.89
   2  -2   1 5265.27  131.29
   2  -2   1 5288.17  131.69
  -2  -2  -1 5427.96  132.19
  -2  -2  -1 5493.55  132.69
  -2  -2  -1 5544.95  132.29
   2  -2   1 5214.58  131.49
  -2  -2  -1 5388.06  132.39
  -2  -2  -1 5299.67  132.49
   2  -2   1 5523.75  131.89
   2  -2   1 5121.09  131.59
   2  -2   1 5188.78  131.19
  -2   2  -1 5260.07  131.49
  -2   2  -1 5203.58  130.89
   2   2   1 5427.36  132.29
  -2   2  -1 5416.66  130.99
   2   2   1 5446.35  132.79
   2   2   1 5421.16  132.79
   2   2   1 5445.66  132.39
  -2   2  -1 5269.87  131.49
   2   2   1 5333.17  132.59
   2   2   1 5342.57  132.09
  -3  -2  -1 1662.23   43.70
  -3  -2  -1 1665.63   43.50
   3  -2   1 1615.54   42.70
  -3  -2  -1 1669.53   43.00
  -3  -2  -1 1681.33   43.20
   3  -2   1 1601.44   42.10
  -3  -2  -1 1688.83   43.60
   3  -2   1 1644.64   42.90
  -3  -2  -1 1688.23   44.30
   3  -2   1 1653.43   42.20
   3  -2   1 1601.14   43.00
   3   2   1 1672.83   44.10
   3   2   1 1725.83   43.30
  -3   2  -1 1589.44   41.60
   3   2   1 1707.23   43.20
   3   2   1 1682.53   43.90
  -3   2  -1 1586.74   42.40
   3   2   1 1683.23   43.80
  -3   2  -1 1601.74   42.30
  -3   2  -1 1633.14   41.80
  -3   2  -1 1621.74   42.40
  -4  -2  -1 1307.37   36.30
  -4  -2  -1 1306.67   36.70
  -4  -2  -1 1317.07   35.90
   4  -2   1 1272.17   35.60
  -4  -2  -1 1282.27   36.60
   4  -2   1 1258.97   34.80
   4  -2   1 1321.27   35.90
   4  -2   1 1294.97   34.80
  -4  -2  -1 1273.57   37.40
  -4  -2  -1 1330.87   35.60
   4   2   1 1324.07   37.10
  -4   2  -1 1271.77   35.30
   4   2   1 1303.37   35.80
  -4   2  -1 1264.97   35.10
   4   2   1 1279.97   36.00
  -4   2  -1 1275.77   33.90
  -4   2  -1 1329.67   34.40
   4   2   1 1282.77   36.80
  -4   2  -1 1267.97   35.00
  -5  -2  -1 1618.74   46.40
   5  -2   1 1635.44   44.60
  -5  -2  -1 1666.33   46.50
  -5  -2  -1 1682.03   45.30
   5  -2   1 1609.34   44.50
  -5  -2  -1 1653.13   46.10
   5  -2   1 1662.43   46.10
   5  -2   1 1649.93   45.80
  -5  -2  -1 1652.23   45.50
  -5  -2  -1 1610.84   47.60
   5   2   1 1649.73   47.30
  -5   2  -1 1633.44   45.20
   5   2   1 1640.94   45.60
   5   2   1 1627.34   45.80
  -5   2  -1 1630.14   43.70
  -5   2  -1 1624.74   43.30
  -5   2  -1 1633.44   44.60
  -5   2  -1 1619.14   44.80
   5   2   1 1659.83   47.00
   6  -2   1 1223.28   37.90
  -6  -2  -1 1323.37   38.00
  -6  -2  -1 1276.17   38.50
  -6  -2  -1 1302.97   37.50
  -6  -2  -1 1301.07   38.40
   6  -2   1 1234.48   37.80
   6  -2   1 1253.77   36.60
  -6  -2  -1 1270.47   40.10
   6  -2   1 1249.77   36.60
  -6  -2  -1 1312.77   37.00
  -6   2  -1 1275.97   36.50
  -6   2  -1 1198.78   37.10
  -6   2  -1 1279.77   35.10
   6   2   1 1324.97   39.30
   6   2   1 1311.17   39.50
  -6   2  -1 1231.48   36.50
  -6   2  -1 1236.68   35.50
   6   2   1 1290.87   37.50
   6   2   1 1307.67   37.80
  -6   2  -1 1299.47   38.20
  -7  -2  -1  475.55   22.40
   7  -2   1  485.85   21.90
  -7  -2  -1  451.45   20.80
  -7  -2  -1  469.55   19.40
   7  -2   1  494.75   20.00
  -7  -2  -1  498.05   21.80
   7  -2   1  469.55   21.70
   7  -2   1  500.15   20.50
  -7  -2  -1  479.25   24.30
  -7  -2  -1  481.65   20.70
  -7   2  -1  505.35   17.90
   7   2   1  461.15   23.30
  -7   2  -1  479.45   19.50
   7   2   1  470.65   22.90
  -7   2  -1  493.65   18.70
  -7   2  -1  510.45   21.10
  -7   2  -1  522.65   22.70
   7   2   1  499.95   21.50
  -7   2  -1  497.25   20.00
   7   2   1  481.45   20.70
   8  -2   1  438.66   21.00
  -8  -2  -1  431.46   24.00
  -8  -2  -1  426.66   26.20
  -8  -2  -1  446.56   22.10
   8  -2   1  435.56   23.40
   8  -2   1  419.46   21.20
  -8  -2  -1  446.26   22.00
   8  -2   1  429.16   24.00
  -8  -2  -1  435.06   20.40
  -8  -2  -1  449.46   23.30
   8   2   1  442.66   22.10
   8   2   1  474.95   25.20
  -8   2  -1  434.46   22.60
   8   2   1  436.56   22.70
  -8   2  -1  433.16   24.50
   8   2   1  479.55   24.90
  -8   2  -1  425.36   20.80
  -8   2  -1  410.76   19.20
  -8   2  -1  464.15   18.50
  -8   2  -1  455.15   20.90
  -9  -2  -1  139.99   15.20
   9  -2   1  110.79   13.30
  -9  -2  -1  163.78   17.00
  -9  -2  -1  109.89   17.00
   9  -2   1  106.89   14.40
  -9  -2  -1  117.59   13.60
   9  -2   1   99.99   13.70
   9  -2   1  103.49   14.80
  -9  -2  -1   98.69   14.50
   9   2   1   85.59   15.40
  -9   2  -1   79.69   11.90
  -9   2  -1  113.89   11.80
   9   2   1   92.19   14.00
  -9   2  -1  104.39   13.70
  -9   2  -1  107.79   10.70
   9   2   1  107.59   14.80
   9   2   1  111.09   14.70
  -9   2  -1   91.79   14.90
 -10  -2  -1  538.25   31.00
  10  -2   1  507.65   30.20
 -10  -2  -1  524.85   25.50
 -10  -2  -1  530.05   29.40
 -10  -2  -1  524.75   26.80
 -10  -2  -1  518.55   33.60
  10  -2   1  530.25   27.30
  10  -2   1  529.25   28.10
  10  -2   1  543.35   30.30
 -10   2  -1  534.75   22.40
 -10   2  -1  534.65   24.30
 -10   2  -1  503.45   30.70
 -10   2  -1  516.05   29.00
  10   2   1  447.96   28.90
  10   2   1  519.75   31.80
  10   2   1  529.35   28.10
  10   2   1  412.86   31.90
 -11  -2  -1  190.48   21.60
 -11  -2  -1  235.68   22.50
  11  -2   1  246.18   26.30
  11  -2   1  212.88   21.60
 -11  -2  -1  270.17   24.70
 -11  -2  -1  225.38   19.80
  11  -2   1  258.87   28.80
  11  -2   1  276.37   25.30
 -11  -2  -1  247.68   23.10
 -11   2  -1  242.28   18.80
  11   2   1  206.28   20.30
  11   2   1  178.08   20.40
 -11   2  -1  246.68   21.40
  11   2   1  291.57   25.40
 -11   2  -1  248.38   27.50
  11   2   1  201.88   22.50
 -11   2  -1  252.97   24.30
 -12  -2  -1  264.77   26.70
 -12  -2  -1  295.47   28.80
 -12  -2  -1  277.77   31.00
  12  -2   1  257.47   28.60
 -12  -2  -1  372.26   34.10
  12  -2   1  226.78   24.70
 -12  -2  -1  312.67   30.10
  12  -2   1  292.97   30.70
  12  -2   1  241.58   23.50
 -12   2  -1  193.08   21.30
  12   2   1  314.97   35.60
  12   2   1  295.97   26.30
 -12   2  -1  303.87   27.70
  12   2   1  261.97   23.90
 -12   2  -1  303.97   27.40
  12   2   1  313.07   30.30
 -12   2  -1  292.87   23.00
  12  -3  -1  508.25   35.70
 -12  -3   1  611.34   37.00
 -12  -3   1  469.05   28.40
 -12  -3   1  573.84   34.60
  12  -3  -1  550.34   36.40
 -12  -3   1  574.24   32.00
 -12  -3   1  562.64   32.70
  12  -3  -1  521.45   30.40
  12  -3  -1  573.24   33.10
  12   3  -1  578.54   39.00
 -12   3   1  546.65   30.30
 -12   3   1  520.65   30.50
  12   3  -1  516.45   32.00
 -12   3   1  591.94   33.50
  12   3  -1  512.25   36.90
  12   3  -1  553.74   33.60
 -12   3   1  560.64   26.10
 -11  -3   1  161.28   17.50
  11  -3  -1  168.08   19.10
  11  -3  -1  170.28   17.10
 -11  -3   1  173.98   22.20
 -11  -3   1  157.88   20.10
  11  -3  -1  166.38   19.50
 -11  -3   1  147.19   18.40
  11  -3  -1  158.78   17.10
 -11  -3   1  166.48   16.50
  11   3  -1  173.38   17.80
  11   3  -1  194.28   19.00
 -11   3   1  172.08   14.40
 -11   3   1  201.68   18.80
  11   3  -1  162.28   20.70
 -11   3   1  171.08   17.50
  11   3  -1  143.19   20.00
  10  -3  -1 1000.00   35.80
 -10  -3   1  904.01   40.90
  10  -3  -1  975.90   38.50
  10  -3  -1  910.61   34.90
 -10  -3   1 1011.70   39.20
  10  -3  -1  972.20   37.40
 -10  -3   1  957.10   36.30
 -10  -3   1  971.70   37.70
 -10  -3   1  992.50   34.50
  10   3  -1 1008.10   40.30
  10   3  -1  997.10   39.30
 -10   3   1  963.20   36.70
 -10   3   1  905.31   33.50
 -10   3   1  960.60   32.00
  10   3  -1  975.40   37.20
 -10   3   1  945.41   38.10
 -10   3   1  967.90   31.30
   9  -3  -1  851.51   32.00
   9  -3  -1  832.22   30.70
  -9  -3   1  788.02   31.10
   9  -3  -1  775.32   30.30
   9  -3  -1  820.42   32.80
  -9  -3   1  790.72   36.00
  -9  -3   1  766.62   32.10
  -9  -3   1  796.52   33.60
  -9  -3   1  786.12   29.60
  -9  -3   1  820.72   31.10
  -9   3   1  860.11   27.30
  -9   3   1  796.92   33.20
  -9   3   1  829.82   27.70
  -9   3   1  823.82   29.50
   9   3  -1  750.02   31.70
   9   3  -1  779.52   31.30
   9   3  -1  822.62   33.90
  -9   3   1  833.82   31.60
   9   3  -1  775.42   34.50
  -9   3   1  828.82   29.40
  -8  -3   1 1519.85   46.70
  -8  -3   1 1534.25   49.10
   8  -3  -1 1503.45   44.80
  -8  -3   1 1602.14   47.50
  -8  -3   1 1550.34   46.20
  -8  -3   1 1582.14   45.10
   8  -3  -1 1526.95   46.70
  -8  -3   1 1597.64   46.10
   8  -3  -1 1505.85   46.00
   8  -3  -1 1558.14   45.10
   8   3  -1 1579.64   48.20
  -8   3   1 1520.45   47.10
  -8   3   1 1588.04   44.60
  -8   3   1 1585.04   42.90
  -8   3   1 1531.15   45.60
  -8   3   1 1543.65   43.30
  -8   3   1 1531.75   44.80
   8   3  -1 1576.34   46.30
   8   3  -1 1563.44   47.50
   8   3  -1 1541.25   46.30
  -7  -3   1  536.95   23.50
  -7  -3   1  549.74   25.60
  -7  -3   1  529.55   21.90
  -7  -3   1  559.94   21.40
  -7  -3   1  540.05   22.30
   7  -3  -1  557.34   20.80
   7  -3  -1  583.54   22.70
   7  -3  -1  579.34   22.00
   7  -3  -1  550.14   20.70
  -7  -3   1  524.25   22.70
  -7   3   1  552.94   22.70
   7   3  -1  547.05   22.20
  -7   3   1  566.34   19.40
  -7   3   1  561.04   20.90
   7   3  -1  544.45   22.30
   7   3  -1  559.04   23.80
   7   3  -1  539.05   24.30
  -7   3   1  581.54   19.10
  -7   3   1  566.34   20.50
   6  -3  -1 1488.35   41.70
   6  -3  -1 1477.75   41.60
   6  -3  -1 1483.75   42.80
  -6  -3   1 1539.25   43.10
   6  -3  -1 1486.15   42.40
  -6  -3   1 1534.45   42.60
  -6  -3   1 1494.45   43.20
  -6  -3   1 1560.94   43.80
   6   3  -1 1540.15   44.00
  -6   3   1 1458.25   41.70
  -6   3   1 1486.05   41.50
  -6   3   1 1492.95   40.70
   6   3  -1 1513.75   43.00
   6   3  -1 1524.05   43.10
  -6   3   1 1500.35   40.30
   6   3  -1 1524.05   44.40
  -5  -3   1   24.00    8.60
   5  -3  -1   19.90    7.50
   5  -3  -1   22.70    7.30
  -5  -3   1   20.80    8.90
  -5  -3   1   13.30    7.80
   5  -3  -1   17.30    7.90
  -5  -3   1   11.10    8.30
   5  -3  -1   25.40    7.10
   5   3  -1    9.80    9.40
  -5   3   1   24.00    7.20
  -5   3   1   29.10    6.60
  -5   3   1   17.50    6.90
  -5   3   1   22.10    6.20
   5   3  -1   18.30    8.70
   5   3  -1   18.70    8.60
   5   3  -1   24.90    8.60
  -4  -3   1  215.98   11.80
   4  -3  -1  220.18    9.90
  -4  -3   1  234.18   12.00
  -4  -3   1  223.98   11.40
   4  -3  -1  231.98   10.20
  -4  -3   1  221.68   12.30
   4  -3  -1  221.08   10.80
   4  -3  -1  222.38   10.70
  -4   3   1  217.58   10.30
   4   3  -1  256.67   13.40
  -4   3   1  210.98   10.00
  -4   3   1  233.88    9.20
   4   3  -1  243.98   11.60
   4   3  -1  237.58   11.70
  -4   3   1  215.38    9.30
   4   3  -1  231.28   12.70
  -3  -3   1  167.38    9.20
  -3  -3   1  171.88    9.50
  -3  -3   1  177.78    9.20
   3  -3  -1  184.18    7.50
   3  -3  -1  177.78    7.50
   3  -3  -1  184.88    7.80
  -3  -3   1  174.48    8.80
   3  -3  -1  180.38    8.00
   3   3  -1  170.38    8.90
   3   3  -1  170.18    9.20
  -3   3   1  179.88    7.70
  -3   3   1  199.48    7.00
  -3   3   1  181.28    7.50
  -3   3   1  193.18    6.80
   3   3  -1  165.38    9.80
   3   3  -1  166.18    8.90
   2  -3  -1 4258.17  109.99
  -2  -3   1 4399.76  111.09
   2  -3  -1 4488.15  110.39
  -2  -3   1 4536.15  111.29
   2  -3  -1 4408.56  110.29
  -2  -3   1 4458.15  111.09
  -2  -3   1 4494.65  110.99
   2  -3  -1 4663.53  110.09
  -2   3   1 4303.67  109.69
   2   3  -1 4496.65  111.09
   2   3  -1 4581.84  110.99
  -2   3   1 4406.86  110.19
  -2   3   1 4533.55  110.29
   2   3  -1 4501.65  111.19
  -2   3   1 4740.23  109.79
   2   3  -1 4526.25  111.29
  -1  -3   1  462.15   13.40
   1  -3  -1  476.95   12.30
   1  -3  -1  472.05   12.70
   1  -3  -1  478.55   12.80
  -1  -3   1  455.75   13.20
  -1  -3   1  447.06   13.20
  -1  -3   1  459.85   13.10
   1   3  -1  437.66   13.10
  -1   3   1  456.05   12.00
  -1   3   1  482.75   12.70
   1   3  -1  474.55   13.00
   1   3  -1  458.15   13.20
  -1   3   1  438.06   11.90
  -1   3   1  487.25   12.80
   0  -3  -1   13.10    2.30
   0  -3  -1   13.60    2.60
   0  -3  -1   12.10    2.70
   0  -3   1   14.90    1.80
   0  -3  -1   14.70    2.40
   0  -3   1   15.20    1.80
   0   3   1   13.70    2.30
   0   3   1   11.20    2.70
   0   3   1    8.90    2.10
   0   3  -1   13.70    1.80
  -1  -3  -1  480.05   14.70
  -1  -3  -1  508.95   14.40
  -1  -3  -1  507.15   15.40
  -1  -3  -1  486.95   14.50
   1  -3   1  464.25   12.70
  -1  -3  -1  501.85   15.10
  -1   3  -1  419.66   12.40
  -1   3  -1  448.96   12.50
   1   3   1  484.45   14.10
   1   3   1  506.95   15.30
   1   3   1  487.05   14.50
   1   3   1  490.15   14.60
   2  -3   1  147.69    6.80
   2  -3   1  135.29    7.20
  -2  -3  -1  118.99    9.50
   2  -3   1  119.39    5.20
   2  -3   1  123.59    6.90
  -2  -3  -1  129.99    8.80
   2  -3   1  133.89    6.50
   2  -3   1  124.89    5.30
  -2  -3  -1  125.39    8.30
  -2  -3  -1  121.19    9.10
  -2  -3  -1  116.49    8.40
   2   3   1  160.98   11.90
  -2   3  -1  120.49    6.00
   2   3   1  107.69    8.40
   2   3   1  117.39    8.10
  -2   3  -1  135.09    6.70
   2   3   1  119.99    8.80
   2   3   1  115.99    9.50
   2   3   1  108.39    9.90
  -2   3  -1  126.69    6.00
  -3  -3  -1  354.66   12.80
  -3  -3  -1  358.66   13.60
   3  -3   1  338.77   11.90
  -3  -3  -1  366.56   13.60
  -3  -3  -1  364.96   12.90
  -3  -3  -1  361.76   14.50
   3  -3   1  326.47   11.90
  -3  -3  -1  351.06   13.80
   3  -3   1  334.47   11.00
   3  -3   1  324.87   10.80
  -3   3  -1  336.47   11.90
   3   3   1  358.56   12.80
  -3   3  -1  334.17   11.20
  -3   3  -1  340.27    9.90
  -3   3  -1  354.66   10.20
   3   3   1  350.36   13.80
   3   3   1  384.86   14.30
   3   3   1  365.86   14.30
   3   3   1  379.66   13.20
  -3   3  -1  328.97   11.20
  -3   3  -1  326.07   11.30
  -4  -3  -1  656.43   22.40
   4  -3   1  609.14   19.20
  -4  -3  -1  666.73   23.90
   4  -3   1  604.84   19.40
  -4  -3  -1  681.23   22.70
   4  -3   1  638.34   20.60
   4  -3   1  603.84   20.50
  -4  -3  -1  639.94   21.10
  -4  -3  -1  669.33   21.60
  -4  -3  -1  666.53   22.10
  -4   3  -1  572.14   19.90
  -4   3  -1  605.34   19.40
  -4   3  -1  623.64   19.60
   4   3   1  659.93   23.20
   4   3   1  660.13   22.80
   4   3   1  637.14   21.60
  -4   3  -1  618.84   17.90
  -4   3  -1  623.54   18.30
   4   3   1  639.04   21.20
  -5  -3  -1   20.20   10.50
  -5  -3  -1   -2.90    8.40
   5  -3   1    4.20    7.00
  -5  -3  -1   13.50    8.60
   5  -3   1   13.70    8.00
  -5  -3  -1   14.60    9.40
  -5  -3  -1    4.50    8.20
   5  -3   1   13.10    7.00
  -5  -3  -1   11.00    8.90
   5  -3   1   10.20    8.20
   5   3   1    7.60    9.00
  -5   3  -1    8.60    6.20
   5   3   1   16.50    8.40
  -5   3  -1    4.30    6.80
   5   3   1   20.80    9.70
   5   3   1    6.20    8.80
  -5   3  -1    8.50    5.70
  -5   3  -1   20.10    8.00
  -5   3  -1    8.20    7.00
   6  -3   1   41.90    8.70
   6  -3   1   22.50    8.20
   6  -3   1   48.70    7.70
  -6  -3  -1   35.20   10.70
  -6  -3  -1   39.30    9.80
  -6  -3  -1   36.50    8.90
   6  -3   1   34.00    7.60
  -6  -3  -1   29.90    8.10
  -6  -3  -1   31.50    8.50
  -6  -3  -1   34.10    8.00
   6   3   1   17.50    8.80
  -6   3  -1   25.50    5.90
   6   3   1   36.10    8.40
  -6   3  -1   31.90    8.10
   6   3   1   48.80   10.40
  -6   3  -1   33.90    6.60
   6   3   1   41.20   10.00
  -6   3  -1   32.90    6.90
  -6   3  -1   23.20    7.20
  -7  -3  -1   23.10   11.00
  -7  -3  -1   29.00    9.60
   7  -3   1   33.90    7.90
  -7  -3  -1   28.30    8.80
   7  -3   1   37.60    9.50
  -7  -3  -1   18.80    7.90
  -7  -3  -1   27.70    8.70
   7  -3   1   40.40    8.50
   7  -3   1   21.80    8.80
  -7  -3  -1   21.40    9.70
  -7   3  -1   25.60    7.40
  -7   3  -1   35.80    7.70
   7   3   1   27.30    8.80
  -7   3  -1   29.60    6.20
   7   3   1   21.40    8.50
  -7   3  -1   26.40    8.50
   7   3   1   31.20   10.20
  -7   3  -1   35.40    7.20
   7   3   1   18.70    9.00
  -8  -3  -1  613.44   26.00
   8  -3   1  613.44   26.80
   8  -3   1  656.23   24.40
  -8  -3  -1  593.64   25.60
  -8  -3  -1  613.04   24.70
  -8  -3  -1  622.64   27.80
   8  -3   1  638.74   25.10
  -8  -3  -1  608.74   30.00
  -8  -3  -1  580.74   26.80
   8  -3   1  581.04   27.00
  -8   3  -1  599.34   21.00
  -8   3  -1  625.64   24.00
  -8   3  -1  652.53   22.20
  -8   3  -1  619.84   25.70
   8   3   1  625.44   28.60
   8   3   1  597.24   26.50
   8   3   1  628.14   29.10
  -8   3  -1  612.64   23.90
   8   3   1  623.34   25.80
  -9  -3  -1   77.89   16.00
  -9  -3  -1   64.89   13.50
   9  -3   1   97.09   13.10
  -9  -3  -1   63.29   14.20
   9  -3   1   70.79   13.60
   9  -3   1   64.29   13.90
  -9  -3  -1   72.39   12.20
   9  -3   1   87.69   12.50
  -9  -3  -1   61.89   13.10
   9   3   1   74.39   13.40
   9   3   1   56.49   15.00
   9   3   1   69.49   14.00
  -9   3  -1   88.69   10.90
  -9   3  -1   54.79   11.10
  -9   3  -1   64.69   13.90
  -9   3  -1   81.59    9.70
  -9   3  -1   82.19   13.30
   9   3   1   46.70   13.00
  10  -3   1   82.19   16.20
 -10  -3  -1  107.59   17.00
 -10  -3  -1   74.39   15.30
  10  -3   1   76.09   14.50
 -10  -3  -1  118.69   19.00
  10  -3   1  103.89   16.60
  10  -3   1   95.49   14.20
 -10  -3  -1   85.49   13.70
 -10  -3  -1  103.69   15.00
 -10   3  -1   89.59   10.60
  10   3   1   99.39   16.40
  10   3   1   83.39   15.30
 -10   3  -1   96.09   16.00
 -10   3  -1  103.39   12.10
  10   3   1   78.59   17.40
 -10   3  -1   76.29   15.60
  10   3   1   72.69   17.50
  11  -3   1   26.40   15.90
 -11  -3  -1   11.20   14.60
 -11  -3  -1   20.60   15.50
 -11  -3  -1   -3.50   13.50
  11  -3   1    8.70   14.40
 -11  -3  -1   18.70   18.70
  11  -3   1    7.10   13.70
 -11  -3  -1  -14.60   15.30
  11  -3   1   -5.80   15.50
  11   3   1    2.10   15.30
 -11   3  -1   -7.80    9.90
 -11   3  -1   15.80   11.50
 -11   3  -1   21.80   13.20
  11   3   1   20.50   17.10
  11   3   1    5.00   14.50
 -11   3  -1   -1.90   12.00
 -11   3  -1   23.90   15.20
  11   3   1   27.70   18.00
  12  -3   1  209.18   21.30
 -12  -3  -1  212.08   21.20
 -12  -3  -1  354.06   34.50
 -12  -3  -1  240.88   21.30
  12  -3   1  199.88   20.60
  12  -3   1  202.28   22.40
  12  -3   1  178.18   22.10
 -12  -3  -1  214.28   22.00
 -12  -3  -1  180.38   18.70
  12   3   1  245.78   22.90
  12   3   1  188.28   24.60
 -12   3  -1  266.87   21.20
 -12   3  -1  204.98   19.30
  12   3   1  280.67   30.00
 -12   3  -1  206.88   19.70
  12  -4  -1   32.80   16.90
 -12  -4   1   49.99   19.10
  12  -4  -1   56.69   16.50
 -12  -4   1   48.60   17.80
  12  -4  -1   31.60   14.80
 -12  -4   1   29.10   16.60
 -12  -4   1    5.60   12.60
 -12  -4   1   27.70   17.40
 -12  -4   1  -10.10   16.10
  12  -4  -1   -8.20   16.80
 -12   4   1   23.20   14.10
  12   4  -1   45.80   16.30
 -12   4   1   21.00   11.70
  12   4  -1   65.59   17.20
  12   4  -1   22.30   19.70
 -12   4   1   -2.90    7.70
 -12   4   1   19.90   13.80
  12   4  -1   61.39   19.20
 -12   4   1   14.50   13.00
 -12   4   1   19.20   13.70
  11  -4  -1    5.70   12.90
 -11  -4   1  -19.80   13.50
 -11  -4   1   17.40   16.30
  11  -4  -1  -23.40   14.50
  11  -4  -1   -5.20   12.50
 -11  -4   1  -35.50   13.90
  11  -4  -1  -13.80   14.10
 -11  -4   1    7.70   14.60
 -11  -4   1  -25.60   17.20
 -11   4   1   -0.60   10.30
  11   4  -1    2.70   13.70
 -11   4   1  -14.40   13.50
 -11   4   1  -14.10    9.20
 -11   4   1  -11.20   10.70
  11   4  -1   14.30   14.90
  11   4  -1  -20.00   16.60
  11   4  -1  -12.60   15.30
 -10  -4   1  380.36   23.80
 -10  -4   1  369.36   24.90
 -10  -4   1  382.86   26.70
 -10  -4   1  353.06   30.80
 -10  -4   1  356.26   27.90
  10  -4  -1  400.36   23.70
  10  -4  -1  303.07   22.70
  10  -4  -1  408.96   25.80
  10  -4  -1  370.66   26.30
  10   4  -1  330.37   25.60
 -10   4   1  344.97   24.60
  10   4  -1  353.46   28.30
  10   4  -1  376.76   29.00
 -10   4   1  348.17   21.40
 -10   4   1  371.76   18.10
 -10   4   1  370.96   19.40
   9  -4  -1  251.57   19.40
  -9  -4   1  261.97   21.90
   9  -4  -1  277.17   21.70
   9  -4  -1  222.08   21.60
  -9  -4   1  230.38   20.70
  -9  -4   1  267.17   21.70
  -9  -4   1  267.07   24.00
  -9  -4   1  263.77   22.90
  -9  -4   1  288.77   20.30
   9  -4  -1  249.97   19.40
   9   4  -1  224.18   24.10
  -9   4   1  257.47   16.40
   9   4  -1  277.17   25.30
  -9   4   1  222.58   17.80
   9   4  -1  250.17   22.00
  -9   4   1  281.47   15.70
  -9   4   1  253.77   18.60
  -9   4   1  252.87   21.00
   9   4  -1  250.87   20.40
  -8  -4   1  661.83   26.80
   8  -4  -1  659.63   26.20
  -8  -4   1  607.24   27.40
  -8  -4   1  617.14   26.10
   8  -4  -1  606.74   24.10
   8  -4  -1  648.64   25.50
   8  -4  -1  624.84   23.90
  -8  -4   1  627.54   24.80
  -8  -4   1  650.43   30.10
  -8  -4   1  656.23   26.20
   8   4  -1  609.84   26.10
  -8   4   1  610.04   21.50
   8   4  -1  624.74   27.40
   8   4  -1  642.34   25.90
  -8   4   1  627.64   25.00
  -8   4   1  606.44   23.40
  -8   4   1  602.94   20.90
   8   4  -1  642.84   28.50
  -8   4   1  632.54   23.40
  -7  -4   1  138.29   14.70
   7  -4  -1  126.69   12.50
  -7  -4   1  107.39   10.80
   7  -4  -1   96.49   10.00
  -7  -4   1  123.29   11.50
   7  -4  -1  125.29   12.60
  -7  -4   1  116.79   12.00
   7  -4  -1  117.99   10.70
  -7  -4   1  143.99   13.80
  -7  -4   1  123.29   12.90
  -7   4   1  112.49   10.60
   7   4  -1  111.59   10.50
   7   4  -1  136.09   11.80
  -7   4   1  120.19    9.60
  -7   4   1  108.59    9.80
   7   4  -1  134.89   13.00
   7   4  -1  121.59   11.80
  -7   4   1  107.49   11.90
  -6  -4   1  399.16   19.40
  -6  -4   1  367.86   21.70
  -6  -4   1  399.26   18.70
   6  -4  -1  375.86   16.30
   6  -4  -1  363.06   17.60
   6  -4  -1  402.36   17.60
  -6  -4   1  373.86   17.60
   6  -4  -1  378.56   16.10
  -6  -4   1  370.96   18.50
  -6   4   1  394.16   16.10
   6   4  -1  392.86   19.90
  -6   4   1  371.16   15.70
   6   4  -1  383.16   20.30
   6   4  -1  398.06   18.30
  -6   4   1  391.96   14.20
   6   4  -1  389.26   18.70
  -6   4   1  372.36   14.50
  -5  -4   1   26.70    8.40
   5  -4  -1   22.70    7.20
  -5  -4   1   25.70    8.70
   5  -4  -1   28.90    7.90
  -5  -4   1   17.90    8.70
   5  -4  -1   24.60    7.40
  -5  -4   1   25.30    8.90
   5  -4  -1   28.10    6.80
  -5   4   1   24.90    6.90
   5   4  -1   25.30    8.80
  -5   4   1   20.20    5.70
   5   4  -1   17.90    9.40
   5   4  -1   19.20    8.10
   5   4  -1   27.30    9.50
  -5   4   1   21.50    7.00
  -5   4   1   24.30    5.80
  -4  -4   1 1709.33   46.30
   4  -4  -1 1709.33   44.60
   4  -4  -1 1738.23   45.00
   4  -4  -1 1739.53   44.50
  -4  -4   1 1743.23   46.90
  -4  -4   1 1728.83   46.00
  -4  -4   1 1670.63   46.40
   4  -4  -1 1751.12   45.30
   4   4  -1 1708.23   46.10
   4   4  -1 1744.43   47.20
  -4   4   1 1695.93   43.70
   4   4  -1 1723.13   46.70
  -4   4   1 1684.93   44.60
   4   4  -1 1746.83   46.30
  -4   4   1 1770.72   43.70
  -4   4   1 1749.12   44.80
  -3  -4   1  393.96   13.80
  -3  -4   1  388.96   14.10
   3  -4  -1  379.86   12.00
  -3  -4   1  386.06   13.70
   3  -4  -1  382.36   11.70
  -3  -4   1  389.56   13.40
   3  -4  -1  392.36   12.30
   3  -4  -1  390.06   11.60
  -3   4   1  412.06   10.80
  -3   4   1  375.96   10.70
   3   4  -1  383.26   14.20
  -3   4   1  381.66   11.80
  -3   4   1  378.86   11.90
   3   4  -1  387.46   13.50
   3   4  -1  400.36   13.60
   3   4  -1  396.36   13.90
  -2  -4   1 2924.31   71.99
  -2  -4   1 2944.31   72.39
  -2  -4   1 2780.62   71.99
   2  -4  -1 2676.93   70.59
   2  -4  -1 2977.60   70.69
   2  -4  -1 2814.82   70.99
   2  -4  -1 2847.62   71.09
  -2  -4   1 2888.41   72.09
   2   4  -1 2809.72   72.09
   2   4  -1 2839.22   71.99
  -2   4   1 2913.61   70.99
   2   4  -1 2837.62   71.89
  -2   4   1 2990.40   70.99
   2   4  -1 2937.81   72.39
  -1  -4   1  163.08    7.10
   1  -4  -1  163.38    6.60
   1  -4  -1  153.58    5.70
   1  -4  -1  171.18    6.90
  -1  -4   1  148.49    7.50
  -1  -4   1  152.48    7.30
  -1  -4   1  139.89    7.70
   1   4  -1  143.69    7.50
  -1   4   1  167.68    6.40
   1   4  -1  153.28    7.00
  -1   4   1  174.68    6.70
   0  -4  -1 1394.56   36.10
   0  -4   1 1459.55   35.30
   0  -4  -1 1396.36   36.00
   0  -4   1 1324.57   34.80
   0  -4  -1 1427.36   35.70
   0  -4   1 1438.46   35.20
   0  -4  -1 1413.36   36.30
   0   4  -1 1458.55   35.30
   0   4   1 1443.26   35.50
   0   4   1 1395.46   35.90
   0   4   1 1420.96   36.20
  -1  -4  -1 1751.02   45.00
  -1  -4  -1 1734.23   45.50
  -1  -4  -1 1771.22   44.70
  -1  -4  -1 1789.12   45.40
  -1  -4  -1 1729.33   45.20
  -1  -4  -1 1728.83   45.00
   1   4   1 1792.62   44.60
   1   4   1 1769.12   45.30
   1   4   1 1735.33   44.90
   1   4   1 1754.52   44.90
   2  -4   1 2980.30   76.39
   2  -4   1 3010.30   76.49
   2  -4   1 2926.61   76.39
  -2  -4  -1 3187.88   78.49
  -2  -4  -1 3156.38   77.99
   2  -4   1 3040.60   76.29
  -2  -4  -1 3167.08   77.89
  -2  -4  -1 3137.89   78.29
  -2  -4  -1 3147.79   78.79
   2   4   1 3163.28   77.99
   2   4   1 3176.48   77.79
  -2   4  -1 2984.40   76.09
  -2   4  -1 3060.39   76.19
   2   4   1 3136.29   78.09
   2   4   1 3171.48   78.49
   2   4   1 3203.98   78.69
   2   4   1 3145.49   78.39
  -2   4  -1 2998.20   75.99
  -3  -4  -1    8.30    4.80
   3  -4   1    5.50    2.90
  -3  -4  -1    2.80    5.20
   3  -4   1    9.40    2.90
  -3  -4  -1    8.20    4.70
  -3  -4  -1    2.60    4.90
  -3  -4  -1    7.10    4.60
   3  -4   1    9.30    3.80
  -3  -4  -1   13.90    5.50
   3  -4   1   12.90    3.80
   3   4   1   10.00    4.60
  -3   4  -1    6.90    3.10
   3   4   1    8.20    5.50
   3   4   1   12.90    4.70
  -3   4  -1    9.70    3.10
   3   4   1    5.20    5.10
  -3   4  -1    5.40    3.60
  -4  -4  -1 4352.86  107.39
   4  -4   1 4140.69  105.49
  -4  -4  -1 4430.66  108.39
  -4  -4  -1 4248.57  108.89
  -4  -4  -1 4285.67  107.89
   4  -4   1 4045.10  106.09
  -4  -4  -1 4288.87  107.89
   4  -4   1 4144.59  106.29
  -4  -4  -1 4366.06  107.59
   4  -4   1 4112.09  105.59
  -4   4  -1 4280.87  104.29
  -4   4  -1 4303.27  104.19
  -4   4  -1 4102.79  105.59
  -4   4  -1 4108.49  105.59
   4   4   1 4291.57  107.29
   4   4   1 4296.07  107.49
  -4   4  -1 4135.49  106.19
   4   4   1 4432.86  108.39
   4   4   1 4445.06  108.59
  -4   4  -1 4110.29  105.79
  -5  -4  -1  203.68   17.20
  -5  -4  -1  167.28   15.00
   5  -4   1  154.58   12.20
  -5  -4  -1  194.58   19.00
  -5  -4  -1  191.58   16.90
  -5  -4  -1  170.68   15.70
  -5  -4  -1  174.78   16.00
   5  -4   1  168.08   14.60
   5  -4   1  167.28   12.40
   5  -4   1  178.58   14.40
   5   4   1  198.68   18.20
  -5   4  -1  171.18   12.10
  -5   4  -1  188.78   14.20
  -5   4  -1  158.08   12.00
  -5   4  -1  161.98   13.10
  -5   4  -1  170.08    9.20
  -5   4  -1  170.98    9.70
   5   4   1  183.58   15.90
   5   4   1  190.28   14.60
   5   4   1  204.58   17.70
  -6  -4  -1 2618.94   70.09
   6  -4   1 2619.94   69.09
  -6  -4  -1 2661.03   70.69
  -6  -4  -1 2641.94   69.79
   6  -4   1 2637.84   69.29
  -6  -4  -1 2648.64   69.39
  -6  -4  -1 2598.14   70.59
  -6  -4  -1 2619.94   71.79
   6  -4   1 2604.74   68.19
   6  -4   1 2587.14   67.99
  -6   4  -1 2617.94   67.79
   6   4   1 2662.53   71.09
  -6   4  -1 2555.74   68.29
   6   4   1 2642.94   69.99
  -6   4  -1 2673.33   66.09
   6   4   1 2667.03   69.69
  -6   4  -1 2635.74   66.39
  -6   4  -1 2600.04   67.89
   6   4   1 2642.74   71.39
  -6   4  -1 2381.06   70.49
  -7  -4  -1    6.60    8.00
  -7  -4  -1    3.70    9.30
   7  -4   1   -4.10    7.90
  -7  -4  -1   11.20    9.00
  -7  -4  -1   10.80   11.20
  -7  -4  -1    8.20    8.20
   7  -4   1    9.00    7.40
  -7  -4  -1   -1.40    8.90
   7  -4   1    7.20    7.60
   7  -4   1    1.30    8.70
   7   4   1   15.40   10.20
   7   4   1   -6.20    9.30
  -7   4  -1   12.70    7.00
  -7   4  -1    6.40    6.10
  -7   4  -1    3.70    7.70
   7   4   1    4.50    9.30
   7   4   1   12.20    8.50
  -7   4  -1    6.70    6.80
  -7   4  -1    2.20    5.40
  -8  -4  -1 1852.01   54.39
  -8  -4  -1 1837.22   53.59
  -8  -4  -1 1833.82   53.09
   8  -4   1 1771.72   51.59
  -8  -4  -1 1752.02   54.29
   8  -4   1 1831.22   53.49
  -8  -4  -1 1930.21   52.49
   8  -4   1 1775.52   51.19
  -8  -4  -1 1836.92   56.69
   8  -4   1 1794.72   53.09
  -8   4  -1 1786.22   51.89
  -8   4  -1 1820.12   51.09
   8   4   1 1763.02   52.99
   8   4   1 1816.82   55.19
   8   4   1 1816.42   53.69
  -8   4  -1 1847.32   48.30
   8   4   1 1869.81   55.99
  -8   4  -1 1805.92   50.79
  -8   4  -1 1816.22   48.80
   9  -4   1   33.50   13.30
   9  -4   1   27.50   11.00
  -9  -4  -1    4.40    7.20
  -9  -4  -1   35.00   14.00
  -9  -4  -1   20.50   13.10
  -9  -4  -1   38.20   16.10
  -9  -4  -1   32.80   12.80
   9  -4   1   24.40   12.20
   9  -4   1   16.30   11.60
  -9  -4  -1   16.70   11.70
  -9   4  -1   16.70    8.70
   9   4   1   23.60   14.00
  -9   4  -1   35.00   11.20
  -9   4  -1   32.80   10.50
  -9   4  -1   27.80    8.00
   9   4   1   39.00   13.40
  -9   4  -1   37.50   12.60
   9   4   1    8.00   14.00
   9   4   1   24.50   11.40
  10  -4   1  861.71   36.50
 -10  -4  -1  871.21   36.90
  10  -4   1  824.72   33.40
 -10  -4  -1  891.01   35.10
  10  -4   1  881.01   33.60
 -10  -4  -1  829.42   33.40
 -10  -4  -1  865.81   38.00
 -10  -4  -1  851.01   41.40
  10  -4   1  780.82   36.10
  10   4   1  920.11   40.60
 -10   4  -1  856.21   34.20
 -10   4  -1  852.41   28.50
  10   4   1  884.01   39.10
 -10   4  -1  862.81   27.50
  10   4   1  853.61   36.20
  11  -4   1   46.20   14.70
 -11  -4  -1   35.70   16.80
 -11  -4  -1   22.90   15.50
 -11  -4  -1   80.39   20.70
  11  -4   1   53.29   16.70
 -11  -4  -1   30.50   14.70
  11  -4   1   31.00   16.10
 -11  -4  -1   61.49   15.80
  11  -4   1   49.99   14.20
 -11   4  -1   23.80   12.60
  11   4   1   18.00   17.80
 -11   4  -1    3.40    6.50
  11   4   1   46.00   18.40
 -11   4  -1   25.90   10.50
  11   4   1   40.80   15.50
 -11   4  -1   35.90   14.50
  11   4   1   57.09   17.30
 -12  -4  -1  501.95   32.80
  12  -4   1  537.05   35.70
  12  -4   1  553.34   31.60
 -12  -4  -1  549.74   38.70
 -12  -4  -1  525.55   34.90
  12  -4   1  561.74   32.80
 -12  -4  -1  477.15   33.50
  12  -4   1  525.95   35.50
 -12   4  -1  526.95   30.40
  12   4   1  459.85   34.70
 -12   4  -1  497.55   29.70
  12   4   1  481.05   33.10
  12   4   1  437.66   38.80
  12  -5  -1  558.24   32.30
 -12  -5   1  569.44   33.20
 -12  -5   1  488.35   33.20
 -12  -5   1  505.85   34.10
  12  -5  -1  480.35   34.20
  12  -5  -1  619.54   35.20
 -12  -5   1  495.35   36.50
 -12  -5   1  396.76   38.20
  12  -5  -1  507.65   29.90
  12   5  -1  523.65   37.70
 -12   5   1  496.45   29.00
  12   5  -1  497.45   39.80
 -12   5   1  469.95   28.30
  12   5  -1  507.65   33.30
  12   5  -1  534.35   33.10
 -11  -5   1   18.60   14.90
 -11  -5   1   -5.70   18.60
  11  -5  -1    0.70   15.30
 -11  -5   1   -5.20   15.00
  11  -5  -1   13.10   12.60
  11  -5  -1    7.40   14.80
 -11  -5   1   18.70   14.40
 -11  -5   1    7.10   16.40
 -11  -5   1   10.20   13.70
  11  -5  -1   12.60   13.50
 -11   5   1   -4.80    6.20
  11   5  -1   20.80   17.40
 -11   5   1    5.50   13.90
 -11   5   1    5.80    9.70
  11   5  -1   15.40   16.30
  11   5  -1    3.90   14.80
 -10  -5   1  569.04   27.60
 -10  -5   1  585.94   29.00
 -10  -5   1  579.74   32.50
 -10  -5   1  581.04   31.10
 -10  -5   1  565.04   34.90
  10  -5  -1  542.55   29.90
  10  -5  -1  579.34   27.10
  10  -5  -1  593.14   29.20
  10  -5  -1  581.04   27.70
  10   5  -1  569.14   33.30
  10   5  -1  543.35   32.50
 -10   5   1  608.34   28.30
 -10   5   1  610.74   22.10
  10   5  -1  565.94   30.10
 -10   5   1  578.34   21.00
 -10   5   1  551.04   25.20
   9  -5  -1   61.49   12.60
  -9  -5   1   39.20   13.40
  -9  -5   1   49.50   13.40
  -9  -5   1   57.09   16.40
  -9  -5   1   40.80   12.00
   9  -5  -1   69.89   12.40
   9  -5  -1   63.99   11.60
   9  -5  -1   53.29   11.40
  -9  -5   1   47.60   12.90
  -9  -5   1   59.79   13.10
   9   5  -1   52.99   13.80
  -9   5   1   45.00    8.00
  -9   5   1   45.00   10.60
  -9   5   1   50.49   12.40
   9   5  -1   48.60   12.80
  -9   5   1   48.80    8.80
   9   5  -1   51.49   14.00
  -9   5   1   40.20   10.40
   8  -5  -1 1007.90   32.40
  -8  -5   1 1050.89   34.80
   8  -5  -1 1035.30   32.30
   8  -5  -1 1008.80   34.00
  -8  -5   1  939.51   37.80
  -8  -5   1  965.70   35.70
   8  -5  -1  999.90   33.40
  -8  -5   1  958.90   34.50
  -8  -5   1 1045.50   33.70
  -8  -5   1  995.80   35.30
  -8   5   1 1035.90   28.90
   8   5  -1 1031.80   34.20
   8   5  -1 1003.60   36.80
  -8   5   1  979.90   31.70
  -8   5   1 1042.00   29.40
  -8   5   1  998.30   32.70
   8   5  -1 1051.09   34.80
  -8   5   1 1007.20   31.60
   8   5  -1 1023.70   36.20
   7  -5  -1  345.47   16.60
  -7  -5   1  415.16   19.80
  -7  -5   1  393.96   19.60
   7  -5  -1  341.97   18.20
  -7  -5   1  389.66   22.70
   7  -5  -1  347.17   16.60
  -7  -5   1  384.76   20.10
   7  -5  -1  388.76   18.00
  -7  -5   1  371.06   18.30
  -7  -5   1  385.76   20.80
   7   5  -1  423.06   21.60
  -7   5   1  354.96   20.60
   7   5  -1  377.66   19.30
  -7   5   1  359.46   16.10
   7   5  -1  377.56   20.50
  -7   5   1  383.36   14.10
  -7   5   1  352.66   17.40
   7   5  -1  371.66   18.80
  -7   5   1  368.26   13.60
  -7   5   1  344.07   15.90
  -6  -5   1  617.84   23.60
   6  -5  -1  615.24   22.00
   6  -5  -1  621.14   21.70
  -6  -5   1  583.64   23.90
   6  -5  -1  609.34   20.50
  -6  -5   1  620.84   23.50
   6  -5  -1  600.54   20.70
  -6  -5   1  628.34   22.60
  -6  -5   1  574.04   25.90
  -6   5   1  613.44   20.50
  -6   5   1  605.94   22.00
   6   5  -1  633.74   25.20
  -6   5   1  614.74   20.30
   6   5  -1  621.84   24.50
   6   5  -1  610.04   22.90
  -6   5   1  616.24   18.40
   6   5  -1  595.04   23.20
  -6   5   1  622.34   18.10
   5  -5  -1  327.07   16.00
   5  -5  -1  323.37   15.40
  -5  -5   1  321.37   17.50
  -5  -5   1  349.67   18.30
  -5  -5   1  337.87   18.00
  -5  -5   1  339.77   19.40
   5  -5  -1  311.27   14.60
   5  -5  -1  317.87   14.20
   5   5  -1  335.87   17.90
   5   5  -1  357.76   19.20
  -5   5   1  340.57   11.70
  -5   5   1  309.77   14.60
   5   5  -1  337.07   19.80
   5   5  -1  350.16   17.80
  -5   5   1  331.57   14.40
  -5   5   1  314.67   11.80
   4  -5  -1 2298.17   58.99
  -4  -5   1 2265.77   60.59
   4  -5  -1 2186.28   58.29
   4  -5  -1 2324.67   58.89
  -4  -5   1 2317.47   60.29
  -4  -5   1 2384.36   61.19
   4  -5  -1 2283.07   58.29
  -4  -5   1 2354.86   60.69
  -4   5   1 2245.08   58.39
   4   5  -1 2317.87   60.99
  -4   5   1 2332.17   56.89
   4   5  -1 2367.26   60.49
  -4   5   1 2283.87   58.59
   4   5  -1 2300.47   60.39
   4   5  -1 2359.26   61.29
  -4   5   1 2232.38   56.89
  -3  -5   1   52.09    5.90
   3  -5  -1   59.29    5.50
   3  -5  -1   55.19    4.80
  -3  -5   1   57.39    6.40
  -3  -5   1   42.50    5.60
   3  -5  -1   54.89    4.80
  -3  -5   1   40.10    5.20
   3  -5  -1   51.49    5.70
   3   5  -1   57.99    5.80
   3   5  -1   47.70    5.50
   3   5  -1   49.99    5.50
  -3   5   1   47.70    5.20
  -3   5   1   46.30    5.10
   3   5  -1   48.00    5.80
  -2  -5   1 1577.64   40.90
   2  -5  -1 1581.34   39.70
  -2  -5   1 1578.74   41.10
  -2  -5   1 1567.04   41.40
  -2  -5   1 1527.55   41.00
   2  -5  -1 1581.14   39.80
   2  -5  -1 1583.64   39.30
   2  -5  -1 1453.05   39.20
  -2   5   1 1649.83   39.70
   2   5  -1 1558.14   40.80
   2   5  -1 1557.44   40.90
   2   5  -1 1582.84   41.20
  -2   5   1 1706.03   39.80
   2   5  -1 1620.74   41.40
   1  -5  -1  774.62   19.90
  -1  -5   1  725.93   20.10
  -1  -5   1  740.73   20.60
  -1  -5   1  729.43   20.10
   1  -5  -1  739.93   19.60
  -1  -5   1  730.53   20.30
   1  -5  -1  711.43   18.90
  -1   5   1  748.33   19.40
   1   5  -1  746.63   20.40
   1   5  -1  745.93   19.90
  -1   5   1  741.53   19.60
   0  -5  -1 5002.50  124.19
   0  -5  -1 5020.20  124.39
   0  -5  -1 5045.80  123.79
   0  -5   1 4840.72  122.99
   0  -5  -1 4998.40  124.09
   0  -5   1 5069.99  123.39
   0  -5   1 5166.38  123.49
   0   5   1 5111.39  123.49
   0   5   1 4995.80  123.99
   0   5   1 5040.00  124.19
   0   5  -1 5195.48  123.39
  -1  -5  -1  738.83   20.60
  -1  -5  -1  752.62   21.20
  -1  -5  -1  740.93   21.50
  -1  -5  -1  733.23   21.00
  -1  -5  -1  727.13   21.30
  -1  -5  -1  741.93   21.80
   1   5   1  738.73   21.50
   1   5   1  733.93   20.30
   1   5   1  750.12   21.00
   1   5   1  715.83   20.80
  -2  -5  -1    5.80    4.90
   2  -5   1   11.40    2.60
  -2  -5  -1   12.50    4.60
  -2  -5  -1   -0.10    3.80
   2  -5   1    3.80    2.30
  -2  -5  -1    2.70    4.40
   2  -5   1    7.50    2.40
  -2  -5  -1    7.60    4.70
  -2  -5  -1   11.40    3.90
   2   5   1    2.60    4.60
   2   5   1    3.30    4.30
   2   5   1    5.70    3.70
   2   5   1    1.00    4.80
   2   5   1    6.00    4.00
   3  -5   1   27.30    3.00
   3  -5   1   32.70    4.20
  -3  -5  -1   29.50    6.60
  -3  -5  -1   27.90    6.20
  -3  -5  -1   29.00    6.00
  -3  -5  -1   18.90    5.40
   3  -5   1   30.80    3.30
  -3  -5  -1   27.70    6.10
  -3  -5  -1   34.00    6.20
   3  -5   1   28.50    4.20
  -3   5  -1   31.00    3.40
   3   5   1   39.20    6.90
  -3   5  -1   28.50    3.90
   3   5   1   28.10    5.80
   3   5   1   28.40    6.20
   3   5   1   31.20    5.50
  -3   5  -1   30.30    3.30
   4  -5   1  223.08   11.10
  -4  -5  -1  238.58   17.30
  -4  -5  -1  264.17   17.20
  -4  -5  -1  250.27   16.60
   4  -5   1  239.68   13.10
  -4  -5  -1  258.37   15.40
  -4  -5  -1  274.07   19.20
   4  -5   1  229.68   12.90
  -4  -5  -1  266.67   16.00
   4  -5   1  216.18   10.80
  -4   5  -1  230.48   12.60
   4   5   1  264.47   15.00
   4   5   1  265.27   17.40
  -4   5  -1  224.78   11.00
  -4   5  -1  210.58   11.00
   4   5   1  252.17   15.90
   5  -5   1   20.90    6.40
   5  -5   1   31.00    6.50
  -5  -5  -1   31.50   11.00
  -5  -5  -1   25.20    9.10
   5  -5   1   20.40    7.60
  -5  -5  -1   25.10    8.60
  -5  -5  -1   30.80    9.00
  -5  -5  -1   40.80   10.30
  -5  -5  -1   36.30    9.00
   5  -5   1   32.50    7.90
  -5   5  -1   19.10    7.00
  -5   5  -1   28.00    7.40
   5   5   1   26.10    8.70
   5   5   1   31.20    8.50
  -5   5  -1   21.80    6.10
  -5   5  -1   18.70    6.10
   5   5   1   16.60    9.70
   5   5   1   21.90    8.60
  -6  -5  -1  166.88   16.70
   6  -5   1  191.58   14.00
   6  -5   1  175.08   12.20
  -6  -5  -1  177.48   15.30
  -6  -5  -1  191.08   18.50
  -6  -5  -1  190.38   15.70
  -6  -5  -1  159.78   14.60
   6  -5   1  152.78   13.90
   6  -5   1  154.08   11.90
  -6  -5  -1  163.18   16.30
   6   5   1  170.98   17.70
   6   5   1  164.78   15.10
   6   5   1  178.18   14.70
  -6   5  -1  161.88   11.20
  -6   5  -1  165.18   11.40
  -6   5  -1  177.98    8.50
  -6   5  -1  165.08    7.90
  -6   5  -1  161.08   13.20
   6   5   1  185.28   17.20
  -6   5  -1  175.08   12.70
   7  -5   1   22.60    9.00
   7  -5   1   19.00    8.60
   7  -5   1   27.60    7.40
  -7  -5  -1   20.30   10.00
  -7  -5  -1   28.70    9.90
   7  -5   1   22.90    7.90
  -7  -5  -1   19.80   10.60
  -7  -5  -1   11.40   11.20
  -7  -5  -1   25.70    9.10
  -7  -5  -1   23.60    9.00
  -7   5  -1   21.40    5.40
   7   5   1   26.70   11.00
  -7   5  -1   29.50    8.50
   7   5   1   35.90    9.50
   7   5   1   23.40    9.20
  -7   5  -1   18.50    6.80
  -7   5  -1   22.10    8.00
  -7   5  -1   25.80    4.90
  -7   5  -1   23.40    7.10
   7   5   1   25.00   10.50
  -8  -5  -1   12.40   13.80
   8  -5   1   27.10    9.00
   8  -5   1   30.30   10.30
   8  -5   1   18.30    9.60
  -8  -5  -1   26.10   11.40
   8  -5   1   27.30   10.60
  -8  -5  -1   11.90   11.60
  -8  -5  -1   14.20   11.20
  -8  -5  -1   20.60   10.90
  -8  -5  -1   24.50   10.10
   8   5   1   37.40   10.80
  -8   5  -1   26.60   10.00
   8   5   1    9.20   11.00
   8   5   1   20.20   11.50
   8   5   1   44.90   13.40
  -8   5  -1   20.40    8.40
  -8   5  -1   21.90    6.70
  -8   5  -1   41.60    8.80
  -8   5  -1   18.70    9.50
  -8   5  -1   20.70    5.90
   9  -5   1  715.03   28.10
  -9  -5  -1  770.52   29.80
   9  -5   1  674.33   30.60
  -9  -5  -1  754.52   31.40
   9  -5   1  686.33   30.60
  -9  -5  -1  734.53   36.20
  -9  -5  -1  688.23   32.40
  -9  -5  -1  749.53   33.20
  -9  -5  -1  593.74   29.60
   9  -5   1  675.53   28.50
   9   5   1  736.93   34.40
  -9   5  -1  668.73   28.50
   9   5   1  763.22   35.10
  -9   5  -1  628.44   29.00
  -9   5  -1  688.93   26.80
   9   5   1  718.53   31.50
  -9   5  -1  707.93   27.20
  -9   5  -1  729.63   22.90
  -9   5  -1  692.33   22.00
  10  -5   1  241.68   24.90
 -10  -5  -1  232.58   23.60
 -10  -5  -1  214.68   23.30
  10  -5   1  215.48   22.50
 -10  -5  -1  252.77   27.50
 -10  -5  -1  285.37   24.40
  10  -5   1  245.28   25.20
 -10  -5  -1  280.37   26.50
  10  -5   1  246.08   21.10
  10   5   1  273.37   29.80
 -10   5  -1  228.68   13.50
 -10   5  -1  237.68   14.90
  10   5   1  226.28   25.20
 -10   5  -1  253.87   23.20
  10   5   1  254.47   28.10
 -11  -5  -1   25.20   17.00
  11  -5   1   -4.20   15.20
 -11  -5  -1    8.10   15.50
  11  -5   1    8.60   14.20
  11  -5   1   38.50   16.80
 -11  -5  -1    8.40   19.50
 -11  -5  -1   -6.80   11.90
 -11  -5  -1   14.70   15.90
 -11  -5  -1   18.10   15.00
  11  -5   1    5.60   13.20
  11   5   1   15.90   17.40
 -11   5  -1   21.20   12.70
  11   5   1   35.30   18.20
 -11   5  -1   26.70   13.30
  11   5   1   22.40   16.50
 -11   5  -1   14.30   12.50
 -11   5  -1    5.70    8.40
 -11   5  -1  -13.20    9.10
 -11   5  -1    2.80    5.50
  11   5   1   27.20   15.60
  12  -6  -1    2.20   15.00
 -12  -6   1   -4.70   19.50
  12  -6  -1   24.00   14.00
 -12  -6   1   36.40   16.50
 -12  -6   1   24.20   17.70
 -12  -6   1   22.70   20.90
 -12  -6   1   27.00   20.20
  12  -6  -1    6.70   16.70
 -12  -6   1   39.30   17.80
  12  -6  -1   18.40   16.80
  12   6  -1   18.10   16.80
  12   6  -1   -0.70   18.10
  12   6  -1   20.20   16.60
 -12   6   1    1.60   10.90
 -12   6   1    8.10   13.70
 -12   6   1    4.10   13.10
 -12   6   1    9.00   12.70
  12   6  -1   18.70   20.90
 -11  -6   1   37.00   15.90
 -11  -6   1   19.10   14.90
 -11  -6   1   33.30   19.30
  11  -6  -1   39.60   14.90
 -11  -6   1   30.70   17.00
 -11  -6   1   31.20   16.00
 -11  -6   1   12.40   10.80
  11  -6  -1   36.00   13.30
  11  -6  -1   10.00   14.30
  11  -6  -1    8.50   13.60
  11   6  -1    3.50   17.60
 -11   6   1   11.80    9.50
  11   6  -1   30.60   18.20
  11   6  -1   47.10   16.10
 -11   6   1   53.79   13.80
 -11   6   1   40.60    7.90
 -11   6   1   21.20   12.30
  10  -6  -1  232.78   21.30
  10  -6  -1  265.17   23.10
 -10  -6   1  213.38   19.40
 -10  -6   1  197.58   18.30
 -10  -6   1  254.27   24.90
  10  -6  -1  228.78   20.20
 -10  -6   1  243.78   22.60
 -10  -6   1  198.98   19.30
  10  -6  -1  261.07   23.70
 -10  -6   1  204.88   21.90
  10   6  -1  257.97   28.30
 -10   6   1  234.18   21.90
 -10   6   1  225.98   12.70
 -10   6   1  246.88   13.80
  10   6  -1  243.98   22.00
  10   6  -1  225.08   24.30
 -10   6   1  247.58   19.10
 -10   6   1  218.18   21.90
  -9  -6   1   90.49   14.00
   9  -6  -1   73.09   11.70
   9  -6  -1   88.79   12.80
  -9  -6   1  107.39   17.40
  -9  -6   1   88.69   15.00
   9  -6  -1   62.59   12.60
  -9  -6   1   78.29   14.00
   9  -6  -1   68.19   11.50
  -9  -6   1   55.79   12.60
  -9  -6   1   79.99   13.10
   9   6  -1   74.59   15.20
   9   6  -1   47.70   14.50
   9   6  -1   76.29   13.40
  -9   6   1   59.99    7.80
  -9   6   1   55.29    7.20
  -9   6   1   66.79   10.70
  -9   6   1   58.09   10.30
  -9   6   1   55.19   12.00
  -9   6   1   63.59   11.70
  -8  -6   1  429.56   27.40
   8  -6  -1  473.75   22.30
  -8  -6   1  442.16   23.40
  -8  -6   1  451.65   22.30
   8  -6  -1  459.65   20.10
  -8  -6   1  453.65   23.40
  -8  -6   1  429.86   24.10
   8  -6  -1  444.56   20.30
   8  -6  -1  452.95   21.50
  -8  -6   1  445.36   24.90
  -8   6   1  433.26   19.10
   8   6  -1  467.05   23.50
   8   6  -1  452.75   25.60
  -8   6   1  421.96   21.30
  -8   6   1  450.95   15.20
  -8   6   1  443.16   20.80
   8   6  -1  459.45   22.60
   8   6  -1  451.95   26.10
  -8   6   1  452.75   15.70
  -8   6   1  454.65   19.30
   7  -6  -1  287.47   16.20
  -7  -6   1  274.57   17.10
  -7  -6   1  287.07   19.40
   7  -6  -1  281.67   14.80
  -7  -6   1  284.27   18.00
   7  -6  -1  276.47   14.80
  -7  -6   1  287.37   18.80
   7  -6  -1  301.77   16.60
  -7  -6   1  286.27   21.70
  -7  -6   1  299.27   18.30
   7   6  -1  303.97   17.50
   7   6  -1  295.47   18.20
  -7   6   1  297.17   14.30
  -7   6   1  276.07   11.00
   7   6  -1  301.67   19.60
   7   6  -1  315.37   20.40
  -7   6   1  297.57   10.70
  -7   6   1  275.97   15.70
  -7   6   1  289.57   16.30
  -7   6   1  282.07   14.30
   6  -6  -1  563.64   20.60
  -6  -6   1  585.04   22.70
  -6  -6   1  550.74   22.60
   6  -6  -1  554.64   19.30
  -6  -6   1  574.44   21.90
   6  -6  -1  561.74   19.10
  -6  -6   1  557.44   25.30
   6  -6  -1  551.34   20.10
  -6  -6   1  602.14   23.70
   6   6  -1  554.14   23.80
  -6   6   1  556.54   15.80
  -6   6   1  540.55   18.70
   6   6  -1  575.74   23.50
   6   6  -1  567.44   22.00
  -6   6   1  557.14   15.70
  -6   6   1  540.45   20.30
   6   6  -1  565.64   22.30
  -6   6   1  562.64   19.10
   5  -6  -1   61.59    6.80
   5  -6  -1   63.19    7.10
   5  -6  -1   58.19    7.60
  -5  -6   1   66.09    9.50
  -5  -6   1   66.99    9.50
  -5  -6   1   55.69   10.50
   5  -6  -1   58.69    7.60
  -5  -6   1   65.59    9.90
   5   6  -1   63.79    9.00
   5   6  -1   72.59   10.80
   5   6  -1   69.09   10.60
   5   6  -1   64.29    9.50
  -5   6   1   68.19    6.80
  -5   6   1   53.59    6.90
   4  -6  -1  619.34   20.00
  -4  -6   1  657.83   23.30
   4  -6  -1  628.44   18.90
  -4  -6   1  638.64   22.50
  -4  -6   1  643.64   22.90
  -4  -6   1  671.63   23.80
   4  -6  -1  599.04   19.00
   4  -6  -1  629.04   19.70
   4   6  -1  685.13   23.70
  -4   6   1  631.74   19.30
   4   6  -1  651.83   22.50
   4   6  -1  678.53   24.40
  -4   6   1  609.94   19.20
   4   6  -1  684.23   22.60
   3  -6  -1 1849.11   48.10
  -3  -6   1 1926.91   49.80
  -3  -6   1 1868.11   49.90
   3  -6  -1 1748.23   47.40
  -3  -6   1 1877.81   49.99
   3  -6  -1 1961.60   47.60
  -3  -6   1 1949.01   50.39
   3  -6  -1 1853.11   47.90
   3   6  -1 1948.80   49.70
   3   6  -1 1921.01   50.39
  -3   6   1 1912.41   47.80
  -3   6   1 1963.10   47.90
   3   6  -1 1934.41   49.70
   3   6  -1 1903.31   50.19
   2  -6  -1  715.33   19.60
  -2  -6   1  746.63   22.00
  -2  -6   1  749.03   22.10
   2  -6  -1  806.32   19.70
  -2  -6   1  773.42   22.00
   2  -6  -1  817.92   20.60
  -2  -6   1  780.62   22.50
   2  -6  -1  793.92   20.50
   2   6  -1  784.22   22.60
   2   6  -1  757.92   21.70
   2   6  -1  752.52   21.70
  -2   6   1  838.12   20.40
  -2   6   1  824.02   20.40
   2   6  -1  770.02   22.30
  -1  -6   1 2657.33   65.69
  -1  -6   1 2600.64   65.29
  -1  -6   1 2652.83   65.39
   1  -6  -1 2482.05   64.29
  -1  -6   1 2539.65   65.49
   1  -6  -1 2684.53   65.09
   1  -6  -1 2664.43   64.89
  -1   6   1 2620.14   64.79
  -1   6   1 2609.34   64.69
   1   6  -1 2634.24   65.49
   1   6  -1 2628.84   65.09
   0  -6   1  569.14   15.10
   0  -6   1  536.75   14.50
   0  -6  -1  547.75   16.60
   0  -6   1  574.54   15.30
   0  -6  -1  556.74   15.60
   0  -6  -1  526.75   16.10
   0  -6  -1  547.25   16.10
   0   6   1  561.04   15.90
   0   6   1  566.24   16.30
   0   6   1  564.74   14.90
   0   6  -1  552.74   15.00
  -1  -6  -1 3747.92   92.29
  -1  -6  -1 3707.93   92.39
  -1  -6  -1 3618.44   91.89
  -1  -6  -1 3650.23   91.99
  -1  -6  -1 3641.64   92.09
  -1  -6  -1 3745.53   91.69
   1   6   1 3778.92   91.39
   1   6   1 3658.13   91.79
   1   6   1 3690.13   92.19
   1   6   1 3594.84   91.79
  -2  -6  -1 3922.71   98.69
  -2  -6  -1 3953.80   98.89
  -2  -6  -1 3933.81   99.19
  -2  -6  -1 3916.81   98.59
  -2  -6  -1 3908.71   98.39
  -2  -6  -1 3904.01   98.19
   2   6   1 3956.50   97.99
   2   6   1 3872.61   98.29
   2   6   1 3912.51   98.79
   2   6   1 3971.00   98.99
   2   6   1 3918.81   98.39
   3  -6   1 1643.14   44.00
  -3  -6  -1 1787.92   47.10
  -3  -6  -1 1711.33   47.00
   3  -6   1 1776.82   43.00
  -3  -6  -1 1822.92   46.80
  -3  -6  -1 1777.42   47.40
   3  -6   1 1633.34   44.00
  -3  -6  -1 1722.93   47.80
  -3  -6  -1 1807.22   46.70
   3  -6   1 1687.93   43.00
   3   6   1 1813.62   46.70
  -3   6  -1 1752.22   43.30
  -3   6  -1 1681.13   43.40
  -3   6  -1 1703.33   43.50
   3   6   1 1753.22   47.40
  -3   6  -1 1675.93   43.60
   3   6   1 1763.02   47.30
   3   6   1 1797.42   46.20
   4  -6   1 4000.80  102.89
   4  -6   1 4050.29  102.99
  -4  -6  -1 4120.89  105.59
  -4  -6  -1 4180.98  105.29
  -4  -6  -1 4206.48  105.19
   4  -6   1 4035.00  101.99
  -4  -6  -1 4094.69  106.69
  -4  -6  -1 4179.78  105.79
   4  -6   1 3960.80  102.09
  -4  -6  -1 4201.58  106.09
  -4   6  -1 4057.79  102.09
   4   6   1 4167.08  106.09
  -4   6  -1 4137.49  102.09
   4   6   1 4234.98  106.39
   4   6   1 4226.38  104.89
  -4   6  -1 4052.09  102.59
   4   6   1 4206.28  105.29
   5  -6   1 1234.68   35.50
   5  -6   1 1225.18   34.40
  -5  -6  -1 1277.97   38.20
   5  -6   1 1204.88   34.20
  -5  -6  -1 1278.57   38.80
  -5  -6  -1 1303.37   37.70
  -5  -6  -1 1280.07   37.90
  -5  -6  -1 1238.38   40.20
  -5  -6  -1 1311.47   39.20
   5  -6   1 1276.07   35.70
  -5   6  -1 1245.68   34.10
   5   6   1 1288.07   37.80
  -5   6  -1 1208.08   34.90
  -5   6  -1 1247.08   34.10
   5   6   1 1285.07   39.00
   5   6   1 1339.57   39.80
   5   6   1 1276.87   37.50
   6  -6   1  857.91   25.90
   6  -6   1  874.31   27.50
  -6  -6  -1  877.31   32.10
  -6  -6  -1  869.31   29.30
  -6  -6  -1  864.21   28.60
  -6  -6  -1  847.52   30.10
   6  -6   1  871.81   26.00
  -6  -6  -1  861.81   29.60
   6  -6   1  857.01   27.20
  -6  -6  -1  852.21   30.30
   6   6   1  876.01   31.20
   6   6   1  861.41   28.50
  -6   6  -1  830.02   26.50
   6   6   1  837.52   30.60
  -6   6  -1  844.12   25.50
   6   6   1  878.61   29.10
  -6   6  -1  844.62   26.30
  -6   6  -1  879.41   25.50
  -7  -6  -1 1339.97   42.60
  -7  -6  -1 1359.46   41.80
  -7  -6  -1 1355.16   42.70
   7  -6   1 1318.47   38.60
  -7  -6  -1 1382.76   45.00
  -7  -6  -1 1378.86   41.10
  -7  -6  -1 1363.96   42.00
   7  -6   1 1300.97   38.60
   7  -6   1 1320.47   39.90
   7  -6   1 1319.97   40.20
  -7   6  -1 1377.86   38.10
  -7   6  -1 1316.87   38.80
   7   6   1 1416.86   43.50
   7   6   1 1434.56   41.50
   7   6   1 1410.36   44.00
  -7   6  -1 1275.17   39.10
   7   6   1 1365.56   41.70
  -7   6  -1 1334.67   38.00
  -8  -6  -1  787.12   32.50
   8  -6   1  794.02   28.00
  -8  -6  -1  811.72   30.40
   8  -6   1  825.62   30.00
  -8  -6  -1  787.02   32.60
  -8  -6  -1  773.62   31.00
  -8  -6  -1  762.12   35.60
  -8  -6  -1  785.82   31.50
   8  -6   1  792.02   29.80
   8  -6   1  812.32   27.70
   8   6   1  830.62   34.50
  -8   6  -1  766.42   28.20
   8   6   1  820.92   31.10
   8   6   1  755.32   33.60
   8   6   1  789.42   30.50
  -8   6  -1  856.41   27.00
  -8   6  -1  813.22   28.30
  -8   6  -1  791.22   26.90
   9  -6   1 1730.23   52.79
   9  -6   1 1790.62   52.79
  -9  -6  -1 1800.22   59.79
  -9  -6  -1 1887.01   57.19
  -9  -6  -1 1863.21   54.49
   9  -6   1 1788.52   54.89
  -9  -6  -1 1875.41   56.39
  -9  -6  -1 1910.71   57.79
   9  -6   1 1804.52   54.69
  -9  -6  -1 1941.61   56.29
   9   6   1 1812.72   58.39
  -9   6  -1 1802.02   51.59
  -9   6  -1 1645.14   52.79
   9   6   1 1889.91   56.19
  -9   6  -1 1760.62   51.49
  -9   6  -1 1765.42   52.79
   9   6   1 1895.21   59.29
  10  -6   1  384.26   26.90
  10  -6   1  337.07   23.20
 -10  -6  -1  432.46   30.90
 -10  -6  -1  325.97   27.00
  10  -6   1  431.56   28.00
 -10  -6  -1  405.16   33.70
 -10  -6  -1  414.06   25.60
 -10  -6  -1  398.36   29.10
  10  -6   1  426.76   25.50
  10   6   1  452.15   32.60
  10   6   1  458.55   28.80
  10   6   1  391.36   31.00
 -10   6  -1  386.86   24.30
  11  -6   1  364.16   27.50
  11  -6   1  391.26   26.20
  11  -6   1  375.56   29.60
 -11  -6  -1  360.66   36.50
 -11  -6  -1  363.66   29.70
  11  -6   1  350.06   29.30
 -11  -6  -1  366.16   29.80
 -11  -6  -1  357.56   33.10
 -11  -6  -1  429.96   32.50
  11   6   1  411.96   33.90
 -11   6  -1  359.76   23.90
  11   6   1  356.86   34.90
 -11   6  -1  406.26   24.60
  11   6   1  373.76   31.00
  11   6   1  368.26   34.40
  12  -7  -1   92.59   17.70
 -12  -7   1   68.79   19.50
  12  -7  -1   89.99   18.50
 -12  -7   1   88.89   19.00
 -12  -7   1  104.69   20.00
 -12  -7   1  107.49   21.10
 -12  -7   1   91.89   23.80
 -12  -7   1  108.19   17.50
  12  -7  -1  120.69   16.60
  12  -7  -1   91.29   17.50
 -12   7   1  100.89   15.50
  12   7  -1   96.59   18.90
  12   7  -1   80.89   18.90
  12   7  -1   68.39   19.40
  12   7  -1  105.99   22.70
 -12   7   1   89.49   15.30
 -11  -7   1  616.64   36.20
 -11  -7   1  563.94   34.60
 -11  -7   1  593.14   39.60
  11  -7  -1  528.25   31.90
  11  -7  -1  572.54   31.70
 -11  -7   1  528.05   33.00
  11  -7  -1  565.94   28.50
  11  -7  -1  563.24   28.80
 -11  -7   1  585.44   32.90
 -11   7   1  538.75   26.60
  11   7  -1  579.64   37.70
  11   7  -1  607.34   36.50
  11   7  -1  627.94   33.30
 -10  -7   1    7.40   14.40
 -10  -7   1    4.40   13.20
  10  -7  -1   10.30   11.40
  10  -7  -1   -3.90   12.00
 -10  -7   1   11.00   12.90
 -10  -7   1    7.50   15.40
 -10  -7   1  -24.60   14.30
  10  -7  -1    3.90   10.80
 -10  -7   1   14.70   17.50
  10  -7  -1   19.10   12.60
 -10   7   1   23.90   12.20
  10   7  -1   22.50   15.10
  10   7  -1    1.50   13.70
  10   7  -1  -13.30   15.00
 -10   7   1    7.60   11.50
 -10   7   1    2.70   10.00
  -9  -7   1  548.55   29.20
  -9  -7   1  580.84   29.00
  -9  -7   1  615.64   31.30
   9  -7  -1  595.34   25.30
  -9  -7   1  611.44   30.00
   9  -7  -1  576.54   27.10
  -9  -7   1  578.54   33.70
   9  -7  -1  601.34   25.30
   9  -7  -1  589.04   26.90
  -9  -7   1  590.34   27.80
  -9   7   1  600.44   25.70
  -9   7   1  621.94   24.00
   9   7  -1  588.84   31.90
  -9   7   1  609.84   23.80
  -9   7   1  575.04   26.00
   9   7  -1  603.14   29.00
   9   7  -1  640.94   28.70
   9   7  -1  645.44   31.60
  -8  -7   1   54.79   14.40
  -8  -7   1   42.40   11.50
   8  -7  -1   34.40    9.80
   8  -7  -1   36.20    8.90
  -8  -7   1   24.00   11.30
   8  -7  -1   38.30   10.40
   8  -7  -1   42.60    9.20
  -8  -7   1   31.00   11.30
  -8  -7   1   30.70   10.60
  -8  -7   1   41.30   12.50
  -8   7   1   36.50    9.50
   8   7  -1   34.60   12.70
   8   7  -1   46.60   11.40
   8   7  -1   23.80   12.00
  -8   7   1   42.70    9.50
  -8   7   1   36.90    8.20
   8   7  -1   38.80   11.30
  -8   7   1   34.00    8.20
  -7  -7   1 1693.13   47.50
  -7  -7   1 1702.73   48.60
  -7  -7   1 1608.14   48.80
  -7  -7   1 1637.74   50.79
  -7  -7   1 1623.94   48.70
   7  -7  -1 1660.23   45.20
   7  -7  -1 1596.14   45.10
   7  -7  -1 1621.74   46.20
   7  -7  -1 1599.14   45.80
  -7  -7   1 1664.23   48.20
  -7   7   1 1606.04   45.20
   7   7  -1 1685.83   49.40
   7   7  -1 1639.94   47.80
  -7   7   1 1656.93   44.70
   7   7  -1 1652.23   49.80
   7   7  -1 1694.93   47.80
  -7   7   1 1634.04   44.60
  -7   7   1 1588.74   45.60
  -6  -7   1    0.70    7.70
   6  -7  -1    1.10    5.50
  -6  -7   1   12.10    8.60
  -6  -7   1    7.60    8.30
  -6  -7   1    0.10    8.30
   6  -7  -1   -0.10    6.40
  -6  -7   1   22.80    9.90
  -6  -7   1   12.60    8.50
   6  -7  -1    5.90    6.60
   6  -7  -1    4.00    5.70
   6   7  -1    1.80    8.60
   6   7  -1   10.70    9.40
   6   7  -1    8.40    7.80
  -6   7   1    6.80    5.50
  -6   7   1   -4.70    5.30
   6   7  -1    7.40    7.60
  -6   7   1    3.90    6.40
  -5  -7   1  895.51   28.50
  -5  -7   1  870.11   29.70
  -5  -7   1  887.81   28.70
   5  -7  -1  807.42   24.80
   5  -7  -1  824.12   24.70
   5  -7  -1  845.52   25.90
  -5  -7   1  851.21   28.90
   5  -7  -1  838.92   25.60
   5   7  -1  901.41   28.50
   5   7  -1  870.31   29.30
   5   7  -1  867.41   28.20
  -5   7   1  883.91   24.90
   5   7  -1  904.11   30.30
  -5   7   1  861.01   24.80
   4  -7  -1 1059.19   29.90
  -4  -7   1 1092.59   34.00
  -4  -7   1 1084.89   32.90
   4  -7  -1 1131.29   29.10
  -4  -7   1 1072.69   33.20
  -4  -7   1 1090.49   33.00
   4  -7  -1 1062.09   29.70
   4  -7  -1 1030.00   29.10
  -4   7   1 1115.09   29.40
  -4   7   1 1111.59   29.30
   4   7  -1 1085.29   33.50
   4   7  -1 1106.99   32.90
   4   7  -1 1101.59   34.10
   4   7  -1 1064.89   32.40
   3  -7  -1 2699.03   74.29
  -3  -7   1 3057.59   77.09
  -3  -7   1 3081.89   77.29
  -3  -7   1 3056.29   77.69
  -3  -7   1 3090.69   77.39
   3  -7  -1 3032.40   74.49
   3  -7  -1 2867.11   74.99
   3  -7  -1 2939.01   75.09
   3   7  -1 3075.09   76.99
   3   7  -1 3077.79   77.49
  -3   7   1 3067.19   74.79
   3   7  -1 3035.30   76.89
  -3   7   1 3138.69   74.89
   3   7  -1 3059.69   77.69
  -2  -7   1   -2.50    3.90
  -2  -7   1    0.00    4.00
  -2  -7   1   -0.70    4.10
  -2  -7   1    6.70    4.60
   2  -7  -1    7.20    2.70
   2  -7  -1    5.60    2.80
   2   7  -1    4.90    4.70
   2   7  -1    0.30    4.00
  -2   7   1    5.90    2.50
   2   7  -1    2.10    3.80
  -2   7   1    6.30    2.60
   2   7  -1    1.80    4.20
  -1  -7   1  308.07   10.40
   1  -7  -1  316.97   10.30
   1  -7  -1  316.37    9.90
   1  -7  -1  280.87    8.90
  -1  -7   1  309.57   11.10
  -1  -7   1  306.77   10.40
  -1  -7   1  290.27   10.60
  -1   7   1  302.07    9.70
   1   7  -1  318.87   10.00
  -1   7   1  312.27    9.50
   1   7  -1  331.67   10.80
   0  -7  -1 1135.09   29.90
   0  -7   1 1127.79   28.80
   0  -7  -1 1117.89   29.40
   0  -7   1 1084.29   28.10
   0  -7   1 1098.99   28.50
   0  -7  -1 1117.19   28.90
   0  -7  -1 1104.99   29.40
   0   7   1 1111.09   28.30
   0   7   1 1136.59   29.50
   0   7  -1 1126.69   28.50
   0   7   1 1102.49   29.20
  -1  -7  -1 1005.80   28.50
  -1  -7  -1 1017.40   28.10
  -1  -7  -1 1003.70   27.80
  -1  -7  -1 1041.50   28.30
  -1  -7  -1 1006.00   27.50
  -1  -7  -1 1019.50   27.90
   1   7   1 1005.70   28.10
   1   7   1 1048.20   27.10
   1   7   1 1019.30   27.70
   1   7   1 1013.30   27.60
  -2  -7  -1  226.08   11.20
  -2  -7  -1  220.18   12.10
  -2  -7  -1  240.68   12.90
  -2  -7  -1  224.28   11.40
  -2  -7  -1  225.28   11.00
  -2  -7  -1  229.28   11.70
   2   7   1  219.58   11.10
   2   7   1  225.98   12.10
   2   7   1  214.68   12.00
   2   7   1  228.98   10.30
   2   7   1  224.48   11.10
   3  -7   1    3.70    4.10
  -3  -7  -1    9.10    7.80
  -3  -7  -1   13.10    7.10
  -3  -7  -1   14.00    7.20
   3  -7   1    4.70    4.00
  -3  -7  -1    3.40    7.30
  -3  -7  -1   15.40    9.00
  -3  -7  -1   14.30    7.10
   3   7   1   11.40    8.00
   3   7   1    8.90    6.80
   3   7   1   -0.10    6.80
   3   7   1    0.70    7.90
   4  -7   1  135.69    8.40
   4  -7   1  134.89   11.00
  -4  -7  -1  113.89   12.70
  -4  -7  -1  129.59   11.50
  -4  -7  -1  160.48   13.10
  -4  -7  -1  124.69   12.00
  -4  -7  -1  127.59   11.10
  -4  -7  -1  135.29   15.00
   4  -7   1  130.99    8.10
   4  -7   1  133.29   10.80
  -4   7  -1  148.29    8.40
   4   7   1  146.99   13.00
  -4   7  -1  135.19    8.20
   4   7   1  131.89   14.60
   4   7   1  142.19   12.60
  -4   7  -1  131.39    9.30
  -4   7  -1  125.99    9.00
   4   7   1  140.89   15.40
  -5  -7  -1   10.90    8.50
  -5  -7  -1    8.50    9.10
  -5  -7  -1   18.80   10.50
   5  -7   1   13.10    5.20
   5  -7   1   10.50    6.30
  -5  -7  -1   16.80    8.40
   5  -7   1   11.30    5.30
  -5  -7  -1   10.00    8.50
  -5  -7  -1   10.20    8.60
   5  -7   1   16.70    6.60
  -5   7  -1    5.40    5.00
  -5   7  -1   12.40    4.90
   5   7   1   13.80    9.90
   5   7   1   17.30    8.30
   5   7   1   12.10    9.60
   5   7   1   16.90    7.90
  -5   7  -1   10.60    5.60
  -6  -7  -1  380.36   18.50
   6  -7   1  331.97   14.60
   6  -7   1  352.36   14.50
  -6  -7  -1  353.06   19.70
  -6  -7  -1  352.26   19.40
   6  -7   1  370.36   16.20
  -6  -7  -1  340.37   20.10
  -6  -7  -1  392.26   19.20
   6  -7   1  353.66   16.50
  -6  -7  -1  382.06   22.70
   6   7   1  367.16   18.90
   6   7   1  371.16   18.00
  -6   7  -1  345.77   15.00
   6   7   1  370.06   21.10
  -6   7  -1  329.37   13.80
   6   7   1  375.46   21.20
  -6   7  -1  352.56   13.80
  -7  -7  -1  113.89   12.00
  -7  -7  -1  163.58   18.40
   7  -7   1  133.29   12.60
   7  -7   1  116.49   12.70
  -7  -7  -1  132.39   12.60
   7  -7   1  126.69   11.20
  -7  -7  -1  130.99   15.30
   7  -7   1  124.49   11.10
  -7  -7  -1  149.49   13.70
  -7  -7  -1  130.49   14.40
  -7   7  -1  117.99   11.30
   7   7   1  122.19   12.50
   7   7   1  104.29   13.50
   7   7   1  132.09   14.90
   7   7   1  124.89   11.80
  -7   7  -1  121.19   11.30
  -7   7  -1  129.79   13.20
  -7   7  -1  120.69   13.00
  -8  -7  -1   58.19   15.40
  -8  -7  -1   51.29   13.00
  -8  -7  -1   87.49   13.80
  -8  -7  -1   65.49   13.70
  -8  -7  -1   67.69   13.20
   8  -7   1   86.99   11.60
   8  -7   1   76.29   11.70
   8  -7   1   78.49   10.00
  -8  -7  -1   92.69   12.90
   8  -7   1   78.29   10.80
   8   7   1  102.69   15.30
   8   7   1   75.39   14.10
  -8   7  -1   81.89    9.30
  -8   7  -1   77.39   10.50
  -8   7  -1   81.29    9.30
   8   7   1   70.99   12.70
  -8   7  -1   89.69   10.60
   8   7   1   90.19   14.10
  -9  -7  -1  423.96   27.00
   9  -7   1  368.36   24.40
  -9  -7  -1  416.06   25.10
  -9  -7  -1  473.55   28.70
  -9  -7  -1  395.96   26.90
   9  -7   1  420.26   25.00
  -9  -7  -1  438.56   28.90
  -9  -7  -1  462.65   32.60
   9  -7   1  413.06   22.00
   9  -7   1  422.76   22.50
  -9   7  -1  430.86   22.20
   9   7   1  358.66   26.10
   9   7   1  406.26   30.10
  -9   7  -1  369.56   21.70
  -9   7  -1  407.46   20.30
   9   7   1  397.46   29.40
  -9   7  -1  427.16   20.50
 -10  -7  -1   11.00   18.20
 -10  -7  -1   20.20   16.20
 -10  -7  -1   37.70   15.60
 -10  -7  -1   22.50   12.50
  10  -7   1    8.50   12.50
  10  -7   1   21.40   13.20
 -10  -7  -1   12.10   14.20
  10  -7   1   27.10   11.80
 -10  -7  -1   -2.80   14.50
  10  -7   1   22.90   13.60
 -10   7  -1   22.00    8.20
  10   7   1   18.90   16.40
  10   7   1  -15.50   16.20
 -10   7  -1   -9.60   11.20
 -10   7  -1    4.70    7.40
  10   7   1   14.20   15.20
 -11  -7  -1  189.38   20.90
 -11  -7  -1  163.88   20.10
  11  -7   1  171.68   18.80
 -11  -7  -1  173.18   21.40
  11  -7   1  191.18   18.60
  11  -7   1  147.49   18.70
 -11  -7  -1  194.58   22.50
  11  -7   1  199.48   17.80
 -11  -7  -1  185.68   24.60
 -11   7  -1  153.38   15.90
  11   7   1  194.18   21.20
  11   7   1  191.88   23.90
  11   7   1  202.38   23.80
 -11   7  -1  140.59   15.00
  11  -8  -1   43.70   14.10
 -11  -8   1   34.70   16.50
  11  -8  -1   48.00   14.40
  11  -8  -1   34.80   14.30
 -11  -8   1   41.80   16.30
 -11  -8   1   30.00   19.40
 -11  -8   1   34.10   17.60
  11  -8  -1   33.10   12.50
 -11  -8   1   74.99   17.50
  11   8  -1   30.60   18.10
  11   8  -1   34.60   18.60
  11   8  -1   46.80   16.10
 -11   8   1    5.50    9.50
  11   8  -1   21.00   17.10
 -11   8   1   24.50   11.40
  10  -8  -1    8.60   11.60
 -10  -8   1   -2.70    8.50
 -10  -8   1    4.30   13.60
  10  -8  -1  -10.30   11.80
 -10  -8   1  -18.10   15.00
 -10  -8   1    1.60   15.10
 -10  -8   1  -12.90   17.00
 -10  -8   1  -13.20   14.00
  10  -8  -1   -5.20   10.90
  10  -8  -1  -17.50   12.10
 -10   8   1   15.40   10.70
  10   8  -1    1.20   14.10
  10   8  -1   16.50   16.20
  10   8  -1   -1.60   14.30
 -10   8   1   -5.00   10.70
 -10   8   1   -4.50   10.10
   9  -8  -1  166.18   17.10
   9  -8  -1  173.58   19.30
  -9  -8   1  143.29   15.80
  -9  -8   1  147.69   17.40
  -9  -8   1  138.79   15.60
  -9  -8   1  147.49   18.90
  -9  -8   1  141.49   16.10
  -9  -8   1  230.98   24.00
   9  -8  -1  156.18   17.30
   9  -8  -1  189.08   20.10
  -9   8   1  174.48   17.80
   9   8  -1  168.18   15.80
   9   8  -1  162.88   18.40
  -9   8   1  162.18   15.90
  -9   8   1  167.38   17.50
   9   8  -1  178.18   19.20
  -9   8   1  159.38   15.70
   9   8  -1  144.39   16.10
   8  -8  -1  139.29   12.30
  -8  -8   1  154.68   17.50
  -8  -8   1  140.49   15.00
   8  -8  -1  124.89   11.20
  -8  -8   1  126.29   14.70
  -8  -8   1  113.39   13.60
   8  -8  -1  136.59   11.40
  -8  -8   1  148.19   15.30
  -8  -8   1  149.09   14.40
   8  -8  -1  124.89   12.30
   8   8  -1  140.29   13.70
  -8   8   1  118.79   11.30
  -8   8   1  113.49   10.20
   8   8  -1  167.58   15.70
   8   8  -1  126.19   15.10
  -8   8   1  119.29   11.10
  -8   8   1  140.89   13.40
   8   8  -1  134.79   13.80
   7  -8  -1  693.83   23.00
  -7  -8   1  718.73   27.60
  -7  -8   1  708.13   30.70
   7  -8  -1  661.73   22.80
   7  -8  -1  697.33   24.50
   7  -8  -1  670.43   24.00
  -7  -8   1  739.93   28.30
  -7  -8   1  720.43   28.20
  -7  -8   1  673.73   27.00
  -7  -8   1  694.83   26.50
   7   8  -1  706.43   29.10
   7   8  -1  728.93   28.80
   7   8  -1  687.63   26.80
  -7   8   1  678.43   22.30
  -7   8   1  663.33   23.40
  -7   8   1  699.23   22.30
   7   8  -1  720.63   26.50
  -7   8   1  644.44   23.20
   6  -8  -1    4.40    5.60
  -6  -8   1    7.50   10.40
  -6  -8   1   13.20    8.70
  -6  -8   1    5.90    8.50
  -6  -8   1    5.30    8.30
  -6  -8   1   16.40    9.30
   6  -8  -1   10.40    6.20
   6  -8  -1   15.30    6.50
   6  -8  -1   12.40    5.80
  -6  -8   1    7.30    8.30
  -6   8   1   10.30    6.10
  -6   8   1    7.70    5.40
   6   8  -1   15.00    7.60
   6   8  -1   19.00    8.60
   6   8  -1   12.20    9.30
  -6   8   1    6.40    5.20
   6   8  -1    0.40    8.70
  -5  -8   1 1777.72   49.40
   5  -8  -1 1739.13   46.40
  -5  -8   1 1751.32   51.09
  -5  -8   1 1774.72   49.99
   5  -8  -1 1755.72   46.10
  -5  -8   1 1764.12   49.10
  -5  -8   1 1734.93   48.70
   5  -8  -1 1656.33   45.40
   5  -8  -1 1725.13   45.40
   5   8  -1 1790.82   48.90
  -5   8   1 1715.33   45.30
   5   8  -1 1823.02   50.49
   5   8  -1 1754.42   48.50
  -5   8   1 1662.33   45.70
  -5   8   1 1743.63   45.30
   5   8  -1 1812.52   49.80
  -4  -8   1  313.27   17.50
  -4  -8   1  333.97   19.40
   4  -8  -1  353.96   12.20
   4  -8  -1  331.57   13.60
   4  -8  -1  329.17   11.90
   4  -8  -1  337.27   13.30
  -4  -8   1  317.47   18.30
  -4  -8   1  333.27   17.90
  -4   8   1  372.66   12.50
  -4   8   1  346.97   12.40
   4   8  -1  331.07   17.50
   4   8  -1  327.07   18.60
   4   8  -1  317.17   19.50
   4   8  -1  332.67   17.00
   3  -8  -1 3117.29   83.69
   3  -8  -1 3305.87   84.39
  -3  -8   1 3366.36   86.89
  -3  -8   1 3471.75   86.89
  -3  -8   1 3404.86   87.09
   3  -8  -1 3366.66   84.59
   3  -8  -1 3326.77   83.79
  -3  -8   1 3493.05   87.59
   3   8  -1 3515.05   87.69
  -3   8   1 3440.56   84.19
   3   8  -1 3450.95   86.69
  -3   8   1 3443.96   83.99
   3   8  -1 3515.65   87.39
   3   8  -1 3492.55   86.69
  -2  -8   1    0.00    4.80
   2  -8  -1    5.60    3.10
  -2  -8   1    7.40    5.10
   2  -8  -1    3.60    3.50
  -2  -8   1    4.20    5.10
  -2  -8   1    1.40    4.70
   2   8  -1    1.60    5.20
  -2   8   1    6.30    2.80
   2   8  -1    1.30    4.40
   2   8  -1    2.70    4.60
  -2   8   1    8.80    2.80
   2   8  -1    2.90    5.20
  -1  -8   1 2917.11   72.79
  -1  -8   1 2902.31   72.79
   1  -8  -1 2964.70   72.39
   1  -8  -1 2824.72   71.69
  -1  -8   1 2900.71   72.99
  -1  -8   1 2957.90   73.29
   1  -8  -1 3060.69   72.79
   1   8  -1 2662.53   74.39
   1   8  -1 2947.10   73.09
  -1   8   1 2900.01   72.19
   1   8  -1 2966.90   72.29
  -1   8   1 2909.21   72.09
   0  -8  -1  175.58    9.20
   0  -8   1  153.98    7.00
   0  -8   1  167.18    7.50
   0  -8  -1  167.68    8.30
   0  -8  -1  175.88    7.50
   0  -8   1  161.08    6.30
   0  -8  -1  173.08    8.40
   0   8   1  178.48    8.50
   0   8   1  170.88    6.10
   0   8   1  173.98    7.90
  -1  -8  -1 1185.18   32.60
  -1  -8  -1 1189.78   32.80
  -1  -8  -1 1224.88   33.50
  -1  -8  -1 1205.88   32.30
  -1  -8  -1 1206.78   32.90
  -1  -8  -1 1200.88   33.10
   1   8   1 1206.38   32.50
   1   8   1 1220.78   31.70
   1   8   1 1221.38   32.50
   1   8   1 1217.38   33.00
  -2  -8  -1    6.90    5.90
  -2  -8  -1    6.40    6.20
  -2  -8  -1    1.90    5.80
  -2  -8  -1    2.90    5.60
  -2  -8  -1    2.10    6.70
  -2  -8  -1    6.00    5.90
   2   8   1    6.40    5.10
   2   8   1    4.40    5.80
  -3  -8  -1 5320.07  135.49
   3  -8   1 5106.99  131.99
  -3  -8  -1 5402.36  135.99
   3  -8   1 5072.69  131.89
  -3  -8  -1 5442.36  135.39
  -3  -8  -1 5436.96  136.59
  -3  -8  -1 5438.36  135.79
  -3  -8  -1 5431.96  135.29
   3   8   1 5494.95  136.09
   3   8   1 5505.15  135.29
   3   8   1 5593.04  134.89
  -4  -8  -1  106.29   11.50
   4  -8   1   89.79    6.90
  -4  -8  -1  106.59   11.70
   4  -8   1   98.29    7.30
  -4  -8  -1   99.99   10.90
  -4  -8  -1   87.69   11.80
  -4  -8  -1  118.89   11.30
   4  -8   1   86.69    6.70
  -4  -8  -1  134.09   12.50
   4  -8   1   90.39    9.50
  -4   8  -1   90.39    7.20
   4   8   1  112.29   10.20
  -4   8  -1   93.59    6.70
   4   8   1  124.09   11.30
   4   8   1  130.09   12.50
   4   8   1  133.89   12.60
  -5  -8  -1  679.33   24.90
  -5  -8  -1  679.83   25.70
  -5  -8  -1  700.93   24.60
   5  -8   1  645.14   19.50
   5  -8   1  626.44   19.70
   5  -8   1  653.63   21.00
   5  -8   1  642.24   21.10
  -5  -8  -1  670.33   25.30
  -5  -8  -1  676.13   26.20
  -5  -8  -1  671.53   27.40
   5   8   1  674.93   24.70
   5   8   1  717.23   24.10
  -5   8  -1  640.44   19.20
   5   8   1  709.43   26.70
  -5   8  -1  666.93   19.00
  -5   8  -1  646.44   19.60
   5   8   1  685.43   26.50
  -5   8  -1  636.84   19.70
  -6  -8  -1   82.59   11.50
   6  -8   1   59.49    6.70
  -6  -8  -1   83.69   10.70
  -6  -8  -1   60.89    9.50
  -6  -8  -1   62.79   10.10
   6  -8   1   71.99    8.30
   6  -8   1   58.59    6.80
   6  -8   1   58.19    7.80
  -6  -8  -1   56.99   10.00
  -6  -8  -1   75.49   12.70
   6   8   1   67.69   11.20
   6   8   1   77.39   11.50
   6   8   1   71.29    9.40
  -6   8  -1   57.79    6.10
   6   8   1   77.19   11.00
  -6   8  -1   64.49    7.10
  -6   8  -1   50.59    5.90
  -7  -8  -1 1365.36   43.90
   7  -8   1 1383.46   41.00
   7  -8   1 1361.76   39.70
  -7  -8  -1 1441.26   43.30
   7  -8   1 1368.76   41.10
  -7  -8  -1 1462.25   47.40
   7  -8   1 1387.26   39.60
  -7  -8  -1 1400.86   43.80
  -7  -8  -1 1374.96   44.60
  -7  -8  -1 1453.15   44.80
   7   8   1 1492.75   46.00
  -7   8  -1 1361.36   39.50
  -7   8  -1 1396.66   38.60
  -7   8  -1 1393.76   38.70
   7   8   1 1468.05   43.30
   7   8   1 1407.06   43.70
   7   8   1 1450.55   46.20
   8  -8   1   84.39   10.80
  -8  -8  -1   85.49   17.10
  -8  -8  -1   91.89   13.50
  -8  -8  -1   78.09   14.30
  -8  -8  -1   87.69   14.30
  -8  -8  -1   79.89   12.80
   8  -8   1   77.19   11.60
   8  -8   1   91.59   11.90
  -8  -8  -1   72.89   14.60
   8  -8   1   96.99   10.60
   8   8   1   90.79   15.10
   8   8   1   66.29   12.40
  -8   8  -1   75.89    9.30
  -8   8  -1   90.59   10.30
   8   8   1   73.19   13.90
  -8   8  -1   89.29   10.50
  -8   8  -1   85.69    9.20
   8   8   1   76.09   14.50
  -9  -8  -1 1858.11   58.49
  -9  -8  -1 1783.32   56.39
   9  -8   1 1834.72   52.99
  -9  -8  -1 1918.71   55.89
  -9  -8  -1 1823.52   58.29
   9  -8   1 1832.32   52.49
  -9  -8  -1 1830.82   56.89
   9  -8   1 1691.33   53.99
  -9  -8  -1 1796.42   60.79
   9  -8   1 1883.21   54.29
   9   8   1 1864.71   56.89
   9   8   1 1870.41   58.89
  -9   8  -1 1817.32   50.99
  -9   8  -1 1796.32   52.19
  -9   8  -1 1857.71   50.99
  -9   8  -1 1749.53   51.69
   9   8   1 1862.41   59.69
 -10  -8  -1   56.89   16.50
  10  -8   1   45.50   13.90
  10  -8   1   19.20   13.60
 -10  -8  -1   47.40   16.10
 -10  -8  -1   47.30   17.60
 -10  -8  -1   57.69   16.80
  10  -8   1   17.50   12.40
  10  -8   1   31.50   12.10
 -10  -8  -1   56.09   19.30
  10   8   1   60.09   17.60
  10   8   1   59.49   15.90
  10   8   1   48.10   18.20
 -11  -8  -1  502.05   34.30
 -11  -8  -1  518.45   37.30
  11  -8   1  502.85   31.30
  11  -8   1  539.35   29.80
 -11  -8  -1  540.85   40.30
  11  -8   1  545.55   28.60
 -11  -8  -1  516.65   35.00
  11  -8   1  555.34   31.40
 -11  -8  -1  529.25   38.40
 -11  -8  -1  527.25   33.30
  11   8   1  541.65   39.70
  11   8   1  525.95   34.00
 -11   8  -1  536.75   25.70
 -11   8  -1  528.15   30.30
  11   8   1  531.15   31.90
  11  -9  -1  518.45   29.30
 -11  -9   1  473.05   38.90
  11  -9  -1  477.45   30.30
 -11  -9   1  489.35   34.80
  11  -9  -1  521.85   28.30
 -11  -9   1  488.25   32.40
 -11  -9   1  505.85   35.40
 -11  -9   1  532.35   31.30
  11  -9  -1  554.14   27.50
 -11  -9   1  523.15   33.30
  11   9  -1  447.16   37.90
  11   9  -1  505.55   31.00
 -11   9   1  503.65   24.80
  11   9  -1  532.05   32.50
  11   9  -1  479.35   36.40
  10  -9  -1  201.38   20.60
  10  -9  -1  169.88   18.90
  10  -9  -1  184.48   17.00
  10  -9  -1  188.48   16.80
 -10  -9   1  208.88   21.10
 -10  -9   1  227.58   20.40
 -10  -9   1  227.08   19.50
 -10  -9   1  246.58   22.10
 -10  -9   1  231.78   23.90
 -10   9   1  160.88   14.20
  10   9  -1  240.08   20.40
  10   9  -1  163.88   20.00
 -10   9   1  176.98   17.50
  10   9  -1  207.98   21.20
  -9  -9   1  427.06   28.50
  -9  -9   1  385.76   26.20
  -9  -9   1  379.06   26.40
  -9  -9   1  428.46   28.10
   9  -9  -1  396.16   20.60
  -9  -9   1  420.06   25.30
   9  -9  -1  383.26   22.70
   9  -9  -1  384.26   21.10
   9  -9  -1  363.86   23.20
  -9  -9   1  431.96   31.70
   9   9  -1  442.26   29.90
   9   9  -1  437.66   29.20
  -9   9   1  391.96   19.40
  -9   9   1  407.76   21.10
   9   9  -1  428.66   24.50
   9   9  -1  356.06   25.10
  -9   9   1  397.16   20.90
  -9   9   1  384.56   19.40
   8  -9  -1  465.15   21.60
  -8  -9   1  478.75   27.20
  -8  -9   1  476.95   25.90
  -8  -9   1  521.05   26.90
  -8  -9   1  485.95   30.00
   8  -9  -1  452.65   20.10
   8  -9  -1  431.16   22.20
  -8  -9   1  515.35   24.50
   8  -9  -1  452.65   20.20
  -8  -9   1  479.85   25.50
  -8   9   1  463.15   20.30
   8   9  -1  473.15   24.10
   8   9  -1  473.95   27.20
  -8   9   1  481.15   20.60
  -8   9   1  440.46   18.90
  -8   9   1  452.05   19.10
   8   9  -1  509.65   28.30
   8   9  -1  476.65   25.00
  -7  -9   1  462.15   22.00
  -7  -9   1  450.35   22.80
   7  -9  -1  402.96   18.70
  -7  -9   1  441.66   23.80
   7  -9  -1  434.76   17.50
  -7  -9   1  427.36   25.80
   7  -9  -1  412.46   19.00
  -7  -9   1  413.86   22.30
   7  -9  -1  430.16   17.50
  -7  -9   1  424.26   23.50
   7   9  -1  443.26   24.70
   7   9  -1  420.06   24.20
  -7   9   1  424.86   17.70
  -7   9   1  456.55   16.70
   7   9  -1  448.96   22.30
   7   9  -1  471.05   21.60
  -7   9   1  434.36   16.50
   6  -9  -1  200.28   11.40
  -6  -9   1  238.08   17.40
   6  -9  -1  222.28   12.60
   6  -9  -1  193.78   13.00
  -6  -9   1  245.68   20.20
  -6  -9   1  234.88   16.90
  -6  -9   1  238.58   18.00
  -6  -9   1  232.78   16.90
  -6  -9   1  225.28   16.00
   6  -9  -1  210.18   11.50
  -6   9   1  214.08   11.90
   6   9  -1  238.88   16.20
   6   9  -1  227.18   18.00
   6   9  -1  231.98   18.60
  -6   9   1  216.08   10.90
  -6   9   1  224.08   11.00
   6   9  -1  233.58   15.60
  -5  -9   1 1846.42   51.59
   5  -9  -1 1763.82   47.70
  -5  -9   1 1863.81   52.19
  -5  -9   1 1880.11   51.39
  -5  -9   1 1827.22   52.49
  -5  -9   1 1888.01   52.19
   5  -9  -1 1839.22   47.70
   5  -9  -1 1802.52   48.30
  -5  -9   1 1899.11   53.79
   5  -9  -1 1814.22   48.60
  -5   9   1 1777.02   47.70
  -5   9   1 1929.91   47.50
   5   9  -1 1895.01   51.39
   5   9  -1 1809.72   52.19
   5   9  -1 1895.61   51.19
   5   9  -1 1885.51   52.69
  -5   9   1 1897.21   47.60
   4  -9  -1   65.19    5.40
  -4  -9   1   58.29    9.20
   4  -9  -1   67.49    6.10
   4  -9  -1   70.19    5.40
  -4  -9   1   64.09    9.30
  -4  -9   1   61.69    9.70
   4  -9  -1   66.39    6.40
  -4  -9   1   52.19   10.00
  -4   9   1   52.09    5.20
   4   9  -1   53.09    8.60
   4   9  -1   55.69    9.80
   4   9  -1   65.39    9.50
  -4   9   1   61.79    5.00
   4   9  -1   60.79    9.90
  -3  -9   1 1091.39   33.10
  -3  -9   1 1106.69   34.10
  -3  -9   1 1111.69   33.20
  -3  -9   1 1114.69   33.50
   3  -9  -1 1112.29   29.80
   3  -9  -1 1092.49   29.40
   3   9  -1 1165.38   32.90
   3   9  -1 1103.09   32.30
  -3   9   1 1132.69   28.80
   3   9  -1 1152.18   34.20
   3   9  -1 1125.09   33.70
   2  -9  -1  934.81   24.40
  -2  -9   1  905.31   26.70
  -2  -9   1  884.51   26.20
  -2  -9   1  904.21   26.30
  -2  -9   1  871.51   27.00
   2  -9  -1  928.91   24.10
   2   9  -1  936.71   26.00
   2   9  -1  889.71   25.60
   2   9  -1  891.11   26.80
  -2   9   1  842.12   23.30
  -1  -9   1   24.60    5.00
  -1  -9   1   21.80    4.80
   1  -9  -1   17.00    4.70
   1  -9  -1   20.60    4.30
  -1  -9   1   26.60    5.30
  -1  -9   1   26.30    4.60
   1  -9  -1   21.30    3.40
   1   9  -1   19.70    5.00
  -1   9   1   21.60    3.90
   1   9  -1   22.60    4.00
   1   9  -1   23.50    5.20
  -1   9   1   26.60    4.10
   0  -9   1  578.24   16.70
   0  -9  -1  599.94   17.10
   0  -9  -1  592.44   17.90
   0  -9   1  571.34   16.10
   0  -9  -1  580.94   18.50
   0  -9   1  589.14   17.10
   0  -9  -1  577.24   17.70
   0   9   1  589.34   17.90
   0   9   1  593.74   15.60
   0   9   1  580.74   17.40
  -1  -9  -1   48.70    6.60
  -1  -9  -1   58.09    6.20
  -1  -9  -1   57.89    7.40
   1  -9   1   51.19    5.10
  -1  -9  -1   49.60    6.50
  -1  -9  -1   57.79    6.80
  -1  -9  -1   49.40    6.40
   1   9   1   57.99    6.50
   1   9   1   41.00    5.00
   1   9   1   50.79    6.40
  -2  -9  -1  105.49    8.80
  -2  -9  -1   95.89    9.50
  -2  -9  -1  108.99    9.50
  -2  -9  -1  109.09    9.60
  -2  -9  -1  118.19   10.80
  -2  -9  -1  119.19   10.10
   2   9   1  114.29    9.40
   2   9   1   90.99    7.90
  -3  -9  -1   48.70    9.70
  -3  -9  -1   43.80    9.70
  -3  -9  -1   43.40   11.00
  -3  -9  -1   41.50    9.00
  -3  -9  -1   52.29   10.30
  -3  -9  -1   38.00    9.30
   3   9   1   47.90   10.30
   3   9   1   52.29    8.30
   3   9   1   39.30    9.00
  -4  -9  -1   57.99    9.20
  -4  -9  -1   76.49   11.10
  -4  -9  -1   65.29   11.30
   4  -9   1   69.19    6.00
  -4  -9  -1   58.59   10.60
   4  -9   1   76.89    6.20
  -4  -9  -1   59.79    9.50
  -4  -9  -1   54.99    9.10
   4   9   1   61.59    8.90
   4   9   1   49.80    9.80
   4   9   1   61.09    9.70
   4   9   1   66.09   10.90
   5  -9   1   11.00    5.70
  -5  -9  -1    6.00    8.10
   5  -9   1   14.40    4.50
  -5  -9  -1   15.00    9.30
  -5  -9  -1   33.50   11.10
  -5  -9  -1   16.80    9.30
  -5  -9  -1   21.90    8.60
   5  -9   1   12.70    4.50
  -5  -9  -1   10.80    8.60
   5  -9   1   18.00    5.80
   5   9   1   17.00    9.60
  -5   9  -1    8.50    3.90
   5   9   1    4.20    7.70
   5   9   1   17.00    8.10
   5   9   1    4.70    9.10
  -5   9  -1   12.30    4.20
  -6  -9  -1    9.00    8.70
  -6  -9  -1    0.10    9.00
  -6  -9  -1   -4.70    9.00
   6  -9   1    4.90    6.70
   6  -9   1    5.30    5.50
  -6  -9  -1    5.10    8.70
   6  -9   1    2.10    5.40
  -6  -9  -1   14.80    9.50
   6  -9   1    9.90    6.80
  -6  -9  -1    5.80   11.00
  -6   9  -1    1.90    4.90
   6   9   1    8.20    8.90
   6   9   1    4.10    9.80
  -6   9  -1    0.00    5.30
   6   9   1    8.10    8.30
   6   9   1   -0.70   10.10
  -6   9  -1    1.00    4.70
  -6   9  -1   11.30    4.70
   7  -9   1   26.10    8.60
  -7  -9  -1   15.90   10.70
  -7  -9  -1   13.90   11.50
   7  -9   1   16.20    7.30
  -7  -9  -1   13.90   13.20
  -7  -9  -1   23.50   11.60
  -7  -9  -1   26.30   10.70
   7  -9   1   12.60    7.20
   7  -9   1   14.10    8.50
  -7  -9  -1   19.10   11.00
  -7   9  -1   15.00    6.00
   7   9   1   16.40   11.80
   7   9   1   20.20   10.70
   7   9   1   11.80   12.30
   7   9   1   24.70   10.30
  -7   9  -1   15.40    7.00
  -7   9  -1    9.90    6.10
   8  -9   1  107.49   10.60
  -8  -9  -1   98.89   15.10
  -8  -9  -1  118.89   14.60
   8  -9   1   89.99   10.80
   8  -9   1  110.79   12.00
  -8  -9  -1  117.69   15.80
  -8  -9  -1  131.79   16.00
   8  -9   1   93.19   12.10
  -8  -9  -1  128.09   16.70
  -8  -9  -1  101.89   17.20
   8   9   1  103.19   16.10
   8   9   1  116.99   16.70
  -8   9  -1  111.59   12.50
   8   9   1   91.59   14.60
  -8   9  -1  117.49   10.70
   8   9   1   84.09   13.70
  -8   9  -1  114.79   12.80
  -9  -9  -1  158.18   16.90
  -9  -9  -1  161.18   18.40
   9  -9   1  162.28   15.40
  -9  -9  -1  197.88   18.90
  -9  -9  -1  147.79   17.20
   9  -9   1  174.68   17.70
  -9  -9  -1  138.99   16.90
   9  -9   1  152.58   15.00
   9  -9   1  164.98   18.30
  -9  -9  -1  182.28   21.50
   9   9   1  175.78   20.10
  -9   9  -1  169.68   15.60
  -9   9  -1  162.18   15.20
   9   9   1  171.28   18.60
  -9   9  -1  175.58   17.10
   9   9   1  181.78   18.00
  -9   9  -1  170.48   16.90
  10  -9   1  238.18   23.80
 -10  -9  -1  203.78   20.50
 -10  -9  -1  198.98   20.30
 -10  -9  -1  229.58   21.50
  10  -9   1  242.68   21.80
 -10  -9  -1  240.88   21.60
 -10  -9  -1  226.18   24.20
  10  -9   1  220.48   20.30
  10  -9   1  216.38   23.30
  10   9   1  234.28   21.20
 -10   9  -1  221.98   17.80
  10   9   1  227.48   23.30
 -11  -9  -1  538.25   32.90
 -11  -9  -1  453.65   34.30
 -11  -9  -1  489.15   37.20
  11  -9   1  506.35   31.00
  11  -9   1  485.45   27.70
  11  -9   1  515.25   29.70
 -11  -9  -1  505.35   34.60
 -11  -9  -1  523.85   35.50
 -11  -9  -1  504.45   41.80
 -11   9  -1  470.95   24.40
  11   9   1  484.75   31.40
  11   9   1  495.55   33.30
  11   9   1  564.44   40.30
 -11   9  -1  418.86   36.90
  11 -10  -1   13.80   14.70
 -11 -10   1   30.20   18.30
 -11 -10   1   18.60   17.20
  11 -10  -1   21.30   14.40
 -11 -10   1   14.30   20.80
 -11 -10   1    2.00   16.00
  11 -10  -1   32.60   13.50
 -11 -10   1   30.20   17.70
  11 -10  -1   43.00   13.20
 -11 -10   1   20.20   17.50
  11  10  -1   36.40   19.90
  11  10  -1   36.00   16.20
 -11  10   1    6.80   11.00
  11  10  -1   33.60   16.80
  11  10  -1   38.50   17.80
 -11  10   1   -1.40    9.10
 -11  10   1    9.00    8.30
 -10 -10   1  111.19   18.80
 -10 -10   1  121.79   17.60
  10 -10  -1  178.18   18.90
 -10 -10   1  151.68   18.80
  10 -10  -1  110.19   14.50
  10 -10  -1  124.49   14.00
 -10 -10   1  111.69   18.60
 -10 -10   1  146.49   20.90
  10 -10  -1  138.69   15.40
  10  10  -1  117.09   17.20
  10  10  -1  109.99   20.00
 -10  10   1  126.69   12.30
  10  10  -1  125.19   19.40
  -9 -10   1   35.20   13.10
  -9 -10   1   53.89   15.10
  -9 -10   1   55.19   14.60
   9 -10  -1   47.00   11.90
   9 -10  -1   39.80   10.50
  -9 -10   1   20.80   14.50
   9 -10  -1   36.00    9.50
   9 -10  -1   34.00   11.00
  -9 -10   1   58.99   17.80
  -9 -10   1   28.80   13.70
  -9  10   1   34.10    9.00
   9  10  -1   28.00   15.20
   9  10  -1   50.19   13.70
  -9  10   1   18.10    9.40
  -9  10   1   36.50    9.00
  -9  10   1   44.00   10.00
   9  10  -1   34.20   15.60
   9  10  -1   44.70   12.80
   8 -10  -1  220.88   15.40
  -8 -10   1  226.58   21.30
  -8 -10   1  215.68   20.60
   8 -10  -1  218.28   16.80
  -8 -10   1  232.88   22.30
  -8 -10   1  230.78   22.90
  -8 -10   1  206.08   19.70
  -8 -10   1  204.38   17.50
   8 -10  -1  215.48   18.00
   8 -10  -1  202.58   15.70
  -8  10   1  220.88   14.00
   8  10  -1  231.88   24.20
   8  10  -1  203.18   18.20
  -8  10   1  218.78   14.00
   8  10  -1  232.58   21.40
   8  10  -1  208.68   20.10
  -8  10   1  206.08   15.20
   7 -10  -1  123.89   13.50
  -7 -10   1  126.09   14.30
   7 -10  -1  144.19   11.00
  -7 -10   1  151.98   14.10
  -7 -10   1  123.19   13.70
   7 -10  -1  131.89    9.70
   7 -10  -1  130.09   12.00
  -7 -10   1  114.59   12.90
  -7 -10   1  109.79   15.20
  -7 -10   1  130.89   13.50
   7  10  -1  124.69   14.50
   7  10  -1  126.79   13.30
  -7  10   1  123.59   12.00
  -7  10   1  116.29   10.70
   7  10  -1  124.09   15.10
   7  10  -1  126.19   12.50
  -7  10   1  116.79   10.80
  -6 -10   1   35.30   11.40
   6 -10  -1   47.50    6.10
  -6 -10   1   48.00    9.70
  -6 -10   1   59.69    9.80
  -6 -10   1   67.09   10.80
   6 -10  -1   48.60    7.10
  -6 -10   1   61.69   10.50
   6 -10  -1   53.29    7.40
   6 -10  -1   51.19    6.30
  -6 -10   1   51.69   10.10
   6  10  -1   46.70    9.00
  -6  10   1   39.20    5.60
  -6  10   1   45.00    5.50
  -6  10   1   52.39    6.10
  -6  10   1   51.09    6.20
   6  10  -1   44.20   10.00
   6  10  -1   38.70    9.50
   6  10  -1   48.30   10.60
   5 -10  -1 1368.66   37.60
   5 -10  -1 1407.56   38.30
   5 -10  -1 1409.56   38.50
   5 -10  -1 1406.36   37.60
  -5 -10   1 1451.65   43.10
  -5 -10   1 1533.45   42.20
  -5 -10   1 1420.56   42.00
  -5 -10   1 1483.15   42.60
  -5 -10   1 1441.86   44.20
  -5 -10   1 1450.05   42.60
  -5  10   1 1475.75   37.40
  -5  10   1 1365.46   37.10
   5  10  -1 1432.76   42.90
   5  10  -1 1434.76   41.70
  -5  10   1 1492.45   37.10
   5  10  -1 1401.56   41.20
   5  10  -1 1501.05   43.40
  -4 -10   1 2165.78   59.19
  -4 -10   1 2260.97   59.79
   4 -10  -1 2187.58   54.99
  -4 -10   1 2253.47   61.09
   4 -10  -1 2006.40   54.79
   4 -10  -1 2103.89   55.59
  -4 -10   1 2246.58   59.19
  -4 -10   1 2186.48   60.09
   4 -10  -1 2132.19   55.79
  -4 -10   1 2167.58   59.49
   4  10  -1 2261.17   58.89
   4  10  -1 2248.68   59.89
   4  10  -1 2228.18   58.59
   4  10  -1 2316.67   60.29
  -3 -10   1 1094.39   33.10
  -3 -10   1 1125.19   33.20
  -3 -10   1 1097.69   33.60
   3 -10  -1 1095.89   29.30
  -3 -10   1 1128.89   34.40
  -3 -10   1 1099.79   33.60
   3 -10  -1 1141.59   29.70
   3  10  -1 1118.39   32.40
   3  10  -1 1130.99   34.30
   3  10  -1 1112.69   33.80
   3  10  -1 1109.59   32.70
  -2 -10   1 1076.99   31.10
   2 -10  -1 1067.69   28.10
  -2 -10   1 1049.20   30.50
   2 -10  -1 1078.79   28.60
  -2 -10   1 1030.70   30.60
  -2 -10   1 1041.40   31.50
  -2  10   1  980.80   27.20
   2  10  -1 1067.19   29.90
   2  10  -1 1051.89   29.50
   2  10  -1 1081.29   31.30
   1 -10  -1  450.65   14.00
   1 -10  -1  473.15   15.50
  -1 -10   1  451.55   15.60
  -1 -10   1  453.85   16.30
   1 -10  -1  493.15   16.30
  -1 -10   1  458.55   16.50
  -1 -10   1  446.86   16.10
   1  10  -1  471.85   16.70
   1  10  -1  474.45   16.70
   1  10  -1  472.35   14.40
  -1  10   1  456.05   14.50
  -1  10   1  451.65   14.80
   0 -10   1 1239.38   32.70
   0 -10  -1 1226.28   34.10
   0 -10  -1 1269.57   33.90
   0 -10  -1 1203.68   33.40
   0 -10   1 1241.58   32.40
   0 -10   1 1194.98   32.30
   0 -10  -1 1229.18   32.70
   0 -10  -1 1222.08   33.30
   0 -10   1 1260.37   31.60
   0 -10   1 1182.98   31.80
   0  10   1 1194.78   32.80
  -1 -10  -1  392.76   16.50
  -1 -10  -1  407.96   16.90
  -1 -10  -1  400.96   18.00
   1 -10   1  389.86   12.10
  -1 -10  -1  435.56   16.80
  -1 -10  -1  452.15   17.60
   1 -10   1  380.96   12.20
   1 -10   1  379.66   12.60
  -1 -10  -1  398.96   15.80
   1 -10   1  405.26   12.90
   1  10   1  426.16   16.00
   1  10   1  425.16   14.10
  -2 -10  -1 2711.13   71.49
  -2 -10  -1 2785.32   71.29
  -2 -10  -1 2720.93   70.99
  -2 -10  -1 2660.13   71.09
  -2 -10  -1 2664.33   70.49
  -2 -10  -1 2694.03   72.09
   2  10   1 2739.43   70.59
   2  10   1 2788.72   69.79
  -3 -10  -1 1433.26   41.80
  -3 -10  -1 1421.66   41.20
  -3 -10  -1 1432.26   42.00
  -3 -10  -1 1456.45   42.40
  -3 -10  -1 1430.46   41.40
  -3 -10  -1 1457.55   43.50
   3  10   1 1444.66   41.10
   3  10   1 1459.05   40.20
   3  10   1 1414.36   42.20
  -4 -10  -1  623.14   24.40
  -4 -10  -1  638.24   26.60
  -4 -10  -1  642.34   23.80
  -4 -10  -1  644.64   24.30
   4 -10   1  590.34   18.30
  -4 -10  -1  616.94   24.90
  -4 -10  -1  630.14   23.70
   4  10   1  668.83   25.40
   4  10   1  648.74   22.60
   4  10   1  651.63   23.70
   5 -10   1  211.28   11.20
  -5 -10  -1  214.68   17.00
  -5 -10  -1  197.08   16.00
  -5 -10  -1  231.08   16.50
   5 -10   1  201.68    9.20
   5 -10   1  205.28    8.90
   5 -10   1  205.78   10.90
  -5 -10  -1  220.28   17.80
  -5 -10  -1  205.58   19.50
  -5 -10  -1  223.48   17.20
   5  10   1  212.48   15.90
   5  10   1  220.88   14.70
   5  10   1  208.08   18.30
   5  10   1  207.78   17.80
  -6 -10  -1  788.32   30.20
  -6 -10  -1  851.01   33.40
  -6 -10  -1  838.42   30.60
  -6 -10  -1  894.81   29.80
   6 -10   1  804.02   25.30
  -6 -10  -1  851.41   30.90
   6 -10   1  798.02   25.60
   6 -10   1  814.22   24.00
   6 -10   1  766.92   24.10
  -6 -10  -1  856.51   29.90
  -6  10  -1  809.32   22.90
   6  10   1  871.21   31.60
  -6  10  -1  770.22   23.10
   6  10   1  828.02   31.80
   6  10   1  897.01   29.00
   6  10   1  815.52   29.60
  -6  10  -1  803.42   22.90
  -7 -10  -1  631.64   27.00
   7 -10   1  585.24   20.90
   7 -10   1  604.54   22.50
  -7 -10  -1  635.04   27.90
  -7 -10  -1  628.94   31.40
   7 -10   1  565.84   22.70
   7 -10   1  567.94   20.90
  -7 -10  -1  608.34   28.60
  -7 -10  -1  618.64   28.80
  -7 -10  -1  577.14   26.40
   7  10   1  609.74   29.80
  -7  10  -1  569.04   19.70
  -7  10  -1  597.24   19.80
   7  10   1  637.64   26.10
   7  10   1  598.54   27.10
   7  10   1  585.44   29.10
  -7  10  -1  582.64   18.70
  -7  10  -1  589.74   19.30
  -8 -10  -1  630.44   35.00
   8 -10   1  606.14   23.80
  -8 -10  -1  626.24   30.60
   8 -10   1  609.64   23.30
   8 -10   1  595.44   25.10
   8 -10   1  600.94   25.60
  -8 -10  -1  699.23   31.80
  -8 -10  -1  644.84   30.10
  -8 -10  -1  655.83   29.30
  -8 -10  -1  626.24   31.50
   8  10   1  657.83   32.20
   8  10   1  653.73   29.90
  -8  10  -1  617.64   21.50
  -8  10  -1  599.74   22.30
   8  10   1  634.04   32.50
  -8  10  -1  594.64   20.90
   8  10   1  671.53   28.70
   9 -10   1  540.75   22.90
  -9 -10  -1  492.05   29.80
   9 -10   1  481.15   25.80
  -9 -10  -1  451.05   34.70
  -9 -10  -1  506.45   31.40
   9 -10   1  490.35   24.90
  -9 -10  -1  535.35   30.60
   9 -10   1  517.65   24.20
  -9 -10  -1  505.85   31.40
  -9  10  -1  471.75   20.00
  -9  10  -1  496.05   21.70
   9  10   1  529.95   29.10
   9  10   1  492.05   33.50
   9  10   1  505.65   32.30
  -9  10  -1  506.45   20.80
 -10 -10  -1  756.52   41.90
  10 -10   1  673.53   30.30
 -10 -10  -1  766.02   39.10
 -10 -10  -1  707.63   36.60
  10 -10   1  695.43   29.20
 -10 -10  -1  776.22   39.00
  10 -10   1  713.83   31.40
  10 -10   1  653.53   31.90
 -10 -10  -1  759.22   36.40
  10  10   1  737.73   40.00
  10  10   1  722.23   35.30
  10  10   1  715.93   34.40
 -10  10  -1  706.33   26.60
  11 -10   1  106.19   15.20
 -11 -10  -1  139.19   25.40
 -11 -10  -1  112.29   20.40
 -11 -10  -1   98.79   21.30
  11 -10   1  109.29   17.00
  11 -10   1  119.49   16.90
 -11 -10  -1   88.99   19.10
 -11 -10  -1  143.09   20.30
 -11 -10  -1  159.98   21.60
  11  10   1  111.69   22.80
  11  10   1  102.39   17.40
  11  10   1  127.39   19.20
 -11  10  -1  101.89   12.70
 -11 -11   1  -19.40   21.20
  11 -11  -1  -25.10   13.40
 -11 -11   1   -7.00   17.60
 -11 -11   1   11.70   16.20
 -11 -11   1   -6.30   17.60
  11 -11  -1    1.00   12.90
 -11 -11   1   26.90   18.20
 -11 -11   1   12.10   16.80
  11 -11  -1   13.60   12.80
  11 -11  -1  -15.50   13.20
  11  11  -1  -11.80   15.90
 -11  11   1  -17.30    8.80
  11  11  -1   15.00   19.80
  11  11  -1   36.90   19.70
 -11  11   1   11.00    8.90
  11  11  -1   -7.10   16.30
 -11  11   1  -13.80   10.60
 -10 -11   1 1223.88   50.69
 -10 -11   1 1253.67   46.50
 -10 -11   1 1262.67   45.90
  10 -11  -1 1197.88   41.80
 -10 -11   1 1284.27   47.80
  10 -11  -1 1155.48   39.90
  10 -11  -1 1158.78   40.90
  10 -11  -1 1225.28   39.60
 -10 -11   1 1246.58   47.60
  10  11  -1 1163.08   48.10
 -10  11   1 1182.98   37.40
  10  11  -1 1239.58   45.60
  10  11  -1 1281.37   45.80
  10  11  -1 1219.68   48.90
  -9 -11   1  115.79   19.00
   9 -11  -1  139.19   12.90
  -9 -11   1  104.99   17.20
   9 -11  -1  118.39   11.90
  -9 -11   1  102.39   15.50
   9 -11  -1  122.59   13.80
  -9 -11   1  105.99   15.90
   9 -11  -1  129.49   13.10
  -9 -11   1  122.69   17.20
   9  11  -1  121.69   16.40
  -9  11   1  112.29   10.70
   9  11  -1   97.79   16.30
  -9  11   1  116.09   11.20
  -9  11   1  112.29   10.30
   9  11  -1  100.59   17.80
   8 -11  -1  908.51   29.40
  -8 -11   1  924.91   36.50
   8 -11  -1  875.11   30.00
  -8 -11   1  940.31   36.60
  -8 -11   1  884.41   35.30
  -8 -11   1  984.70   34.60
   8 -11  -1  845.92   30.80
   8 -11  -1  891.01   29.00
  -8 -11   1  868.31   39.10
  -8 -11   1  889.01   34.70
   8  11  -1  930.11   37.00
  -8  11   1  872.31   27.40
   8  11  -1  937.31   37.80
   8  11  -1  925.91   33.90
   8  11  -1  950.30   35.10
  -8  11   1  910.71   27.30
  -8  11   1  875.01   27.90
  -7 -11   1   -1.30   10.20
   7 -11  -1    2.80    6.60
  -7 -11   1   -2.90   10.80
   7 -11  -1    0.80    7.70
   7 -11  -1   -3.50    7.40
  -7 -11   1   -1.50   11.10
  -7 -11   1    4.60   11.00
  -7 -11   1   -6.70   12.60
  -7 -11   1    4.80   10.80
   7 -11  -1    8.80    6.80
   7  11  -1    6.80   12.10
   7  11  -1   13.30   11.90
   7  11  -1   10.30    9.60
  -7  11   1   -4.50    5.80
  -7  11   1   -9.90    6.10
   7  11  -1    6.10   10.50
  -7  11   1  -11.50    5.40
  -7  11   1   -4.80    5.70
   6 -11  -1 1241.28   35.50
  -6 -11   1 1325.47   41.30
   6 -11  -1 1242.48   36.10
   6 -11  -1 1307.37   35.70
  -6 -11   1 1380.56   40.60
  -6 -11   1 1286.97   40.70
  -6 -11   1 1351.96   43.40
  -6 -11   1 1290.27   41.70
   6 -11  -1 1300.77   36.70
  -6 -11   1 1313.17   40.80
   6  11  -1 1370.56   40.60
   6  11  -1 1384.76   42.40
  -6  11   1 1333.27   34.90
  -6  11   1 1364.76   34.50
   6  11  -1 1410.16   40.10
   6  11  -1 1326.47   41.90
  -6  11   1 1262.87   34.70
  -6  11   1 1244.58   34.90
  -5 -11   1  369.46   21.40
   5 -11  -1  321.57   13.30
  -5 -11   1  341.67   18.00
  -5 -11   1  340.87   18.70
  -5 -11   1  326.57   18.50
   5 -11  -1  321.37   12.90
   5 -11  -1  330.57   11.90
  -5 -11   1  324.27   17.50
  -5 -11   1  350.76   19.30
   5 -11  -1  316.07   11.70
   5  11  -1  343.47   17.60
  -5  11   1  299.17   11.10
   5  11  -1  355.86   20.00
   5  11  -1  348.37   17.00
   5  11  -1  352.26   19.00
  -5  11   1  347.97   11.20
  -4 -11   1 1479.65   41.50
  -4 -11   1 1439.96   41.10
   4 -11  -1 1414.86   36.20
  -4 -11   1 1461.05   43.10
   4 -11  -1 1348.86   37.00
  -4 -11   1 1454.85   40.90
   4 -11  -1 1368.06   36.80
  -4 -11   1 1459.15   41.40
  -4 -11   1 1408.96   41.80
   4 -11  -1 1265.27   35.90
   4  11  -1 1466.45   41.70
   4  11  -1 1412.76   40.10
   4  11  -1 1475.85   40.70
   4  11  -1 1421.76   41.80
  -3 -11   1   14.20    8.00
  -3 -11   1   15.30    7.70
  -3 -11   1    8.30    8.00
  -3 -11   1   13.70    8.10
   3 -11  -1    7.60    4.70
  -3 -11   1   22.60    9.50
  -3 -11   1   11.60    8.40
   3 -11  -1   11.30    4.40
   3  11  -1   -2.50    7.90
   3  11  -1   15.60    7.50
   3  11  -1    0.80    8.10
   3  11  -1    1.10    6.50
  -2 -11   1  175.08   14.20
  -2 -11   1  169.58   12.90
  -2 -11   1  209.88   15.90
   2 -11  -1  140.69    7.20
  -2 -11   1  176.38   14.70
  -2 -11   1  145.29   13.70
  -2 -11   1  173.88   13.30
   2 -11  -1  174.48   10.70
   2 -11  -1  180.48    9.90
   2  11  -1  161.18   14.00
   2  11  -1  157.68   12.20
   1 -11  -1   17.40    5.10
  -1 -11   1   17.00    6.80
  -1 -11   1    6.10    6.70
  -1 -11   1   13.70    7.50
  -1 -11   1    6.90    6.70
   1 -11  -1   10.70    6.90
   1 -11  -1    7.30    6.00
  -1 -11   1   10.50    6.10
  -1 -11   1   11.40    7.60
   1  11  -1    7.70    7.00
  -1  11   1   10.60    5.20
   0 -11   1  270.77   12.80
   0 -11   1  250.87   10.40
   0 -11  -1  254.27   15.10
   0 -11   1  244.28   12.10
   0 -11   1  252.37   11.80
   0 -11  -1  242.38   13.30
   0 -11  -1  255.67   13.80
   0 -11  -1  262.97   12.40
   0 -11   1  244.88   11.20
   0 -11  -1  266.47   14.60
   0 -11   1  257.87   13.30
   0 -11  -1  263.97   13.80
   1 -11   1  296.07   11.70
  -1 -11  -1  365.36   16.40
   1 -11   1  310.47   11.00
   1 -11   1  296.27   12.10
  -1 -11  -1  340.27   17.80
   1 -11   1  306.47   11.20
  -1 -11  -1  317.47   16.30
  -1 -11  -1  324.87   16.10
  -1 -11  -1  330.77   17.00
  -1 -11  -1  314.77   15.00
   1  11   1  324.67   12.60
  -2 -11  -1  301.97   17.00
  -2 -11  -1  296.27   17.10
  -2 -11  -1  290.27   16.70
  -2 -11  -1  291.77   17.70
  -2 -11  -1  311.87   15.80
  -2 -11  -1  290.47   18.70
   2  11   1  286.57   16.00
   2  11   1  304.47   13.90
  -3 -11  -1   68.99   11.20
  -3 -11  -1   74.49    9.90
  -3 -11  -1   52.49    9.00
  -3 -11  -1   64.69    9.80
  -3 -11  -1   62.69    9.80
  -3 -11  -1   57.29    9.10
   3  11   1   62.99    8.10
   3  11   1   62.19    9.00
  -4 -11  -1    9.70    7.80
  -4 -11  -1   17.80    8.80
  -4 -11  -1   26.50    9.20
  -4 -11  -1   16.30    8.30
  -4 -11  -1    7.50    9.40
  -4 -11  -1   19.00    8.60
   4  11   1    5.40    8.80
   4  11   1   14.30    7.40
   4  11   1   16.40    8.10
   5 -11   1   45.20    5.60
  -5 -11  -1   38.60    9.40
  -5 -11  -1   38.30   10.30
  -5 -11  -1   36.30    9.70
  -5 -11  -1   45.90   10.10
   5 -11   1   41.20    5.80
   5 -11   1   39.80    4.50
  -5 -11  -1   37.50   11.40
  -5 -11  -1   27.10    9.40
   5 -11   1   42.00    4.20
   5  11   1   39.30   10.20
   5  11   1   37.70    9.70
   5  11   1   38.50    8.70
   6 -11   1  139.29    9.80
  -6 -11  -1  152.38   14.80
  -6 -11  -1  162.78   17.90
   6 -11   1  155.48   11.70
  -6 -11  -1  157.78   17.30
   6 -11   1  144.29   12.10
   6 -11   1  137.49   10.00
  -6 -11  -1  152.28   16.20
  -6 -11  -1  131.09   13.10
  -6 -11  -1  146.29   13.90
   6  11   1  140.59   12.90
   6  11   1  144.79   14.40
   6  11   1  173.08   16.30
   6  11   1  191.98   19.50
   7 -11   1   -3.20    8.10
   7 -11   1    5.20    8.10
  -7 -11  -1   11.40   10.80
  -7 -11  -1    8.10   11.00
  -7 -11  -1   11.10   12.40
   7 -11   1    6.50    7.10
  -7 -11  -1   17.40   14.00
  -7 -11  -1    3.80   11.40
   7 -11   1    0.80    7.00
  -7 -11  -1   13.00   11.00
   7  11   1    4.00   10.60
   7  11   1    9.00   11.70
  -7  11  -1   17.00    5.90
   7  11   1   -0.60   11.40
  -7  11  -1   10.60    5.40
   7  11   1   20.80   13.30
   8 -11   1  412.26   18.90
   8 -11   1  423.36   20.90
  -8 -11  -1  418.56   27.50
  -8 -11  -1  412.06   26.50
   8 -11   1  395.56   19.70
  -8 -11  -1  407.76   26.10
  -8 -11  -1  455.45   28.70
  -8 -11  -1  452.55   31.20
  -8 -11  -1  423.66   28.60
   8 -11   1  396.66   21.20
   8  11   1  474.95   26.80
  -8  11  -1  395.16   15.90
  -8  11  -1  405.36   16.40
  -8  11  -1  410.86   16.90
  -8  11  -1  401.16   16.90
   8  11   1  408.56   24.50
   8  11   1  456.55   30.40
  -9 -11  -1   28.20   15.20
   9 -11   1   11.50   11.30
   9 -11   1   12.70   10.50
  -9 -11  -1    3.70   15.70
  -9 -11  -1    6.00   16.80
   9 -11   1  -11.20   10.80
  -9 -11  -1   -7.00   13.80
   9 -11   1   -0.10    9.40
  -9 -11  -1   30.70   15.30
  -9 -11  -1   13.20   18.10
   9  11   1  -21.80   13.30
  -9  11  -1    7.00    7.60
   9  11   1   11.40   16.10
  -9  11  -1   -4.30    8.10
  -9  11  -1    9.70    8.40
  -9  11  -1    5.00    7.50
  10 -11   1  292.47   22.20
 -10 -11  -1  286.37   32.00
 -10 -11  -1  279.47   29.10
 -10 -11  -1  207.48   24.80
  10 -11   1  271.87   21.10
  10 -11   1  259.97   23.60
 -10 -11  -1  264.07   29.10
 -10 -11  -1  280.17   27.70
 -10 -11  -1  277.37   30.80
  10  11   1  262.87   26.10
  10  11   1  208.88   23.00
 -10  11  -1  245.98   17.90
  10  11   1  288.67   28.50
  11 -11   1   43.30   14.90
 -11 -11  -1   18.80   19.60
  11 -11   1   49.99   14.20
 -11 -11  -1   60.89   18.00
 -11 -11  -1    6.60   18.20
 -11 -11  -1   40.40   21.10
  11 -11   1   41.20   15.10
 -11 -11  -1   -4.90   16.30
 -11 -11  -1   18.20   23.40
 -11  11  -1   25.60   10.90
  11  11   1   25.10   16.80
  11  11   1    6.90   20.00
  11  11   1   28.10   17.20
 -11  11  -1   -0.80    8.50
 -11 -12   1   10.40   17.30
 -11 -12   1   10.40   19.20
  11 -12  -1   20.20   14.10
 -11 -12   1   10.40   18.10
 -11 -12   1   -9.40   21.90
  11 -12  -1   27.60   14.10
 -11 -12   1   12.40   17.40
  11 -12  -1   27.60   13.70
 -11 -12   1   51.29   18.50
  11 -12  -1   -2.00   12.70
 -11  12   1   16.40   10.60
 -11  12   1   -6.20    7.90
  11  12  -1   39.80   20.30
  11  12  -1   34.60   20.20
  11  12  -1   21.20   17.20
  11  12  -1    1.80   17.20
 -10 -12   1   67.59   18.30
  10 -12  -1   93.09   12.90
 -10 -12   1   99.39   20.60
 -10 -12   1   75.69   17.60
  10 -12  -1   67.69   13.60
  10 -12  -1   88.99   12.50
 -10 -12   1   91.39   17.30
  10 -12  -1   80.89   13.20
 -10 -12   1  100.99   17.50
 -10 -12   1   81.89   18.10
  10  12  -1   88.59   18.80
  10  12  -1   89.59   17.20
  10  12  -1   71.19   19.20
  10  12  -1   95.39   16.30
 -10  12   1   68.59   10.10
 -10  12   1   58.39   10.40
  -9 -12   1   30.50   14.60
   9 -12  -1   13.80   11.40
   9 -12  -1   24.10   10.10
  -9 -12   1   24.40   15.40
   9 -12  -1   22.30   10.50
  -9 -12   1   20.80   14.70
  -9 -12   1   -3.50   16.70
   9 -12  -1   18.70    9.40
  -9 -12   1   13.70   14.80
   9  12  -1   37.30   15.40
   9  12  -1   -3.10    8.60
   9  12  -1   29.90   14.80
  -9  12   1    9.70    8.30
   9  12  -1   29.50   16.00
  -9  12   1   31.00    8.40
  -9  12   1    5.20    7.60
  -9  12   1   20.00    7.80
  -8 -12   1  173.48   16.50
   8 -12  -1  166.98   14.30
   8 -12  -1  145.29   14.70
  -8 -12   1  185.28   17.20
  -8 -12   1  173.68   18.10
  -8 -12   1  158.68   16.70
  -8 -12   1  135.29   18.80
  -8 -12   1  148.19   16.00
   8 -12  -1  149.49   16.80
   8 -12  -1  169.08   15.90
  -8  12   1  155.78   12.20
   8  12  -1  134.19   15.10
  -8  12   1  162.18   11.90
  -8  12   1  172.88   11.70
  -8  12   1  141.99   12.40
   8  12  -1  139.99   17.70
   8  12  -1  134.79   15.10
   8  12  -1  140.79   16.30
   7 -12  -1   25.90    7.10
  -7 -12   1   22.00   11.40
  -7 -12   1   17.00   11.20
   7 -12  -1   23.50    7.90
  -7 -12   1   18.60   10.90
  -7 -12   1   23.90   12.40
   7 -12  -1   19.60    7.00
  -7 -12   1   11.70   12.00
   7 -12  -1    6.20    8.00
  -7 -12   1   18.60   13.90
   7  12  -1   23.90   10.80
  -7  12   1   14.20    5.70
   7  12  -1   27.70   11.10
  -7  12   1   20.70    5.90
   7  12  -1   11.40   12.10
   7  12  -1   15.90   12.80
  -6 -12   1  659.83   25.90
   6 -12  -1  607.74   21.00
   6 -12  -1  596.04   19.70
   6 -12  -1  594.24   19.60
   6 -12  -1  599.34   20.30
  -6 -12   1  647.64   26.40
  -6 -12   1  655.23   27.20
  -6 -12   1  623.64   26.40
  -6 -12   1  675.63   27.70
  -6 -12   1  682.33   29.50
  -6  12   1  576.14   18.30
   6  12  -1  707.73   25.20
   6  12  -1  645.74   27.50
  -6  12   1  626.74   18.40
   6  12  -1  695.23   28.20
   6  12  -1  636.54   25.80
   5 -12  -1    5.20    4.30
  -5 -12   1   -6.30    7.80
  -5 -12   1    7.10    9.10
   5 -12  -1    2.40    4.10
  -5 -12   1    1.10    8.10
  -5 -12   1    0.20    9.60
  -5 -12   1   11.30    8.60
   5 -12  -1    4.50    4.90
   5 -12  -1    3.40    5.00
  -5 -12   1    0.90    7.70
   5  12  -1   -0.20    7.60
   5  12  -1    9.90    8.60
   5  12  -1   13.70    9.20
   5  12  -1   11.50    8.20
   4 -12  -1  609.94   17.80
  -4 -12   1  611.94   22.80
  -4 -12   1  572.84   22.40
  -4 -12   1  583.14   22.20
   4 -12  -1  586.84   16.50
   4 -12  -1  605.94   17.30
  -4 -12   1  576.24   22.70
  -4 -12   1  607.74   23.70
   4 -12  -1  575.04   16.20
  -4 -12   1  569.14   24.90
   4  12  -1  595.54   23.30
   4  12  -1  599.44   23.70
   4  12  -1  602.44   21.80
   4  12  -1  605.04   21.40
  -3 -12   1   26.40    8.30
  -3 -12   1   44.40    8.30
  -3 -12   1   45.10    8.40
  -3 -12   1   26.20    7.90
   3 -12  -1   37.60    5.20
   3 -12  -1   34.20    4.50
  -3 -12   1   36.80    9.70
  -3 -12   1   35.60    8.30
   3  12  -1   37.30    8.70
   3  12  -1   37.80    7.10
   3  12  -1   41.90    7.80
   3  12  -1   32.70    8.60
  -2 -12   1 3375.86   86.29
  -2 -12   1 3417.06   85.89
  -2 -12   1 3327.17   85.99
   2 -12  -1 3377.06   83.99
  -2 -12   1 3394.06   86.69
  -2 -12   1 3359.06   86.29
   2 -12  -1 3420.96   84.39
  -2 -12   1 3448.25   87.29
   2 -12  -1 3103.69   82.99
   2  12  -1 3397.06   84.99
   2  12  -1 3409.66   86.39
   1 -12  -1  174.78   12.60
  -1 -12   1  160.78   12.90
   1 -12  -1  168.08    9.50
  -1 -12   1  186.88   14.30
  -1 -12   1  163.38   12.00
  -1 -12   1  181.18   13.70
   1 -12  -1  181.58   11.50
  -1 -12   1  165.98   11.30
  -1 -12   1  178.68   12.40
   0 -12  -1 3103.89   78.99
   0 -12  -1 3029.70   78.19
   0 -12   1 3127.29   77.89
   0 -12   1 3120.49   76.59
   0 -12   1 2972.40   76.79
   0 -12   1 3053.89   77.19
   0 -12  -1 3081.69   78.59
   0 -12  -1 3027.30   77.99
   0 -12  -1 3030.80   77.49
   0 -12   1 3105.59   77.59
   0 -12   1 3059.89   77.19
   0 -12  -1 3102.59   78.29
  -1 -12  -1   65.69    8.70
   1 -12   1   57.99    5.20
   1 -12   1   54.69    5.30
  -1 -12  -1   68.19    8.10
  -1 -12  -1   68.39    9.70
  -1 -12  -1   77.39    9.10
  -1 -12  -1   60.79    8.60
   1 -12   1   56.89    5.80
  -1 -12  -1   83.59    9.40
   1  12   1   61.79    6.00
  -2 -12  -1 1585.04   44.70
  -2 -12  -1 1532.75   45.20
  -2 -12  -1 1538.85   43.80
  -2 -12  -1 1585.64   44.20
  -2 -12  -1 1573.04   44.30
  -2 -12  -1 1535.45   43.50
   2  12   1 1622.54   43.40
   2  12   1 1589.74   42.10
  -3 -12  -1  394.06   18.40
  -3 -12  -1  398.96   19.20
  -3 -12  -1  395.86   19.10
  -3 -12  -1  402.66   21.00
  -3 -12  -1  398.36   19.50
  -3 -12  -1  388.76   18.70
   3  12   1  430.26   18.60
   3  12   1  403.16   16.70
  -4 -12  -1 1469.25   43.30
  -4 -12  -1 1463.75   44.20
  -4 -12  -1 1507.05   45.60
  -4 -12  -1 1483.75   43.30
  -4 -12  -1 1509.95   43.90
  -4 -12  -1 1465.75   43.80
   4  12   1 1500.05   42.10
   4  12   1 1516.35   43.10
   4  12   1 1497.25   44.50
   5 -12   1  120.89    6.80
  -5 -12  -1  114.59   11.40
   5 -12   1  118.19    9.20
  -5 -12  -1  129.49   12.20
  -5 -12  -1  168.68   16.50
   5 -12   1  123.09    8.60
  -5 -12  -1  157.08   14.60
  -5 -12  -1  141.59   12.90
  -5 -12  -1  149.39   13.80
   5 -12   1  115.39    6.90
   5  12   1  121.19   11.00
   5  12   1  158.18   14.10
   5  12   1  142.79   12.30
   6 -12   1  850.21   25.40
   6 -12   1  824.92   26.30
  -6 -12  -1  950.70   34.20
   6 -12   1  863.31   26.60
  -6 -12  -1  912.81   33.10
  -6 -12  -1  961.60   36.40
  -6 -12  -1  883.71   33.40
  -6 -12  -1  926.91   32.20
   6 -12   1  864.11   25.20
  -6 -12  -1  871.11   32.20
   6  12   1  903.31   34.50
   6  12   1  960.90   31.20
   6  12   1  890.51   32.30
  -7 -12  -1   29.70   12.90
   7 -12   1    9.80    8.20
  -7 -12  -1   39.20   15.40
   7 -12   1   15.10    7.10
  -7 -12  -1   34.40   13.20
  -7 -12  -1   -5.30   11.60
  -7 -12  -1   11.30   11.70
   7 -12   1   20.90    8.30
  -7 -12  -1   24.60   12.20
   7 -12   1   28.40    7.50
   7  12   1   14.10   10.60
   7  12   1    5.20   11.20
   7  12   1   17.00   13.50
   8 -12   1  458.15   20.00
  -8 -12  -1  436.06   29.20
  -8 -12  -1  415.46   27.20
   8 -12   1  447.16   20.70
   8 -12   1  462.25   19.30
  -8 -12  -1  436.46   32.20
  -8 -12  -1  403.76   28.90
  -8 -12  -1  462.55   25.80
   8 -12   1  481.55   21.60
  -8 -12  -1  453.65   28.40
   8  12   1  451.65   30.90
   8  12   1  421.26   25.70
   8  12   1  406.76   27.10
  -8  12  -1  444.26   16.80
  -8  12  -1  446.76   16.20
  -9 -12  -1    4.30   14.50
   9 -12   1   14.10    9.50
   9 -12   1   18.70   10.40
  -9 -12  -1   19.00   14.60
  -9 -12  -1   13.50   18.20
  -9 -12  -1    7.30   14.90
  -9 -12  -1    1.20   15.10
   9 -12   1   -5.60   10.70
  -9  12  -1    8.20    7.50
  -9  12  -1    9.90    6.90
   9  12   1    4.30   16.60
   9  12   1   17.90   14.30
  -9  12  -1    3.50    5.20
  -9  12  -1   12.40    7.20
 -10 -12  -1  829.92   37.00
 -10 -12  -1  757.52   40.30
  10 -12   1  703.53   30.30
  10 -12   1  774.12   31.90
 -10 -12  -1  762.12   40.50
 -10 -12  -1  735.93   38.00
 -10 -12  -1  690.33   37.10
 -10 -12  -1  702.73   44.40
  10 -12   1  766.62   29.50
 -10  12  -1  717.33   25.70
  10  12   1  723.43   36.70
  10  12   1  780.62   35.50
 -10  12  -1  738.13   25.40
  10  12   1  731.83   40.70
 -11 -13   1   87.29   21.60
  11 -13  -1   81.19   14.40
 -11 -13   1   77.99   24.40
  11 -13  -1  111.19   15.50
 -11 -13   1  119.19   20.70
  11 -13  -1   96.59   15.60
  11 -13  -1   84.89   14.90
 -11 -13   1   80.29   20.90
 -11 -13   1   95.59   20.40
 -11 -13   1   82.59   20.50
 -11  13   1   55.99   10.40
  11  13  -1   95.29   22.20
 -11  13   1   60.99   11.80
  11  13  -1   81.79   19.20
  11  13  -1  103.09   19.50
  11  13  -1  102.79   23.30
  10 -13  -1  546.35   28.10
  10 -13  -1  604.84   27.00
 -10 -13   1  599.14   35.60
 -10 -13   1  601.34   34.10
  10 -13  -1  642.34   27.80
 -10 -13   1  592.64   36.00
 -10 -13   1  572.24   41.10
 -10 -13   1  572.84   32.70
 -10 -13   1  581.84   36.80
  10 -13  -1  628.04   25.80
  10  13  -1  594.44   37.60
  10  13  -1  568.44   37.20
 -10  13   1  585.14   22.10
  10  13  -1  603.44   33.60
  10  13  -1  615.04   32.60
 -10  13   1  607.84   22.70
  -9 -13   1  323.17   29.00
   9 -13  -1  346.87   19.50
  -9 -13   1  372.16   27.20
   9 -13  -1  321.87   18.50
  -9 -13   1  327.17   33.40
   9 -13  -1  297.07   19.70
  -9 -13   1  352.86   29.30
  -9 -13   1  322.07   28.20
   9 -13  -1  312.87   21.10
  -9  13   1  299.37   15.70
   9  13  -1  320.57   29.50
   9  13  -1  358.56   26.90
  -9  13   1  282.37   14.80
  -9  13   1  275.77   14.50
   9  13  -1  395.46   30.90
   8 -13  -1  407.36   18.30
   8 -13  -1  375.96   20.40
  -8 -13   1  407.46   28.00
   8 -13  -1  408.16   19.30
   8 -13  -1  418.36   18.90
  -8 -13   1  433.36   28.00
  -8 -13   1  443.26   27.40
  -8 -13   1  425.06   31.50
  -8 -13   1  291.57   24.80
   8  13  -1  404.76   24.80
   8  13  -1  426.16   26.40
  -8  13   1  386.26   15.80
  -8  13   1  404.56   15.40
   8  13  -1  389.26   28.10
   8  13  -1  434.86   29.60
   7 -13  -1  111.29   11.70
   7 -13  -1  111.99    9.60
  -7 -13   1  140.39   15.00
   7 -13  -1  112.29   10.10
  -7 -13   1  111.19   14.10
  -7 -13   1  128.99   15.50
  -7 -13   1  110.89   15.10
  -7 -13   1  121.79   17.00
  -7 -13   1   85.89   12.90
   7 -13  -1  114.59   11.90
   7  13  -1  114.89   14.60
   7  13  -1  133.79   16.30
  -7  13   1  105.49    9.20
   7  13  -1  119.49   13.30
   7  13  -1  122.19   13.90
   6 -13  -1  799.62   24.80
  -6 -13   1  814.32   31.10
  -6 -13   1  849.52   32.10
   6 -13  -1  823.22   24.40
  -6 -13   1  865.11   34.20
  -6 -13   1  885.61   31.10
  -6 -13   1  867.61   31.50
   6 -13  -1  788.82   24.20
   6 -13  -1  802.12   25.40
  -6 -13   1  824.02   32.30
   6  13  -1  837.62   29.60
   6  13  -1  863.51   32.10
   6  13  -1  879.11   30.80
   6  13  -1  885.91   33.10
   5 -13  -1    3.40    4.30
  -5 -13   1    9.50    8.30
  -5 -13   1   -1.40    9.40
  -5 -13   1   12.90    9.10
  -5 -13   1    5.40    8.80
   5 -13  -1    5.90    4.20
   5 -13  -1   -0.80    4.90
  -5 -13   1    7.60   10.20
  -5 -13   1    3.00    8.80
   5 -13  -1   -0.10    5.00
   5  13  -1    6.80    8.20
   5  13  -1   -2.10    8.90
   5  13  -1    4.60    9.40
   5  13  -1    4.90    7.70
   4 -13  -1  918.11   25.00
  -4 -13   1  920.61   30.60
  -4 -13   1  905.01   30.40
  -4 -13   1  955.10   32.30
   4 -13  -1  905.61   25.50
  -4 -13   1  947.91   30.10
  -4 -13   1  908.31   31.10
  -4 -13   1  967.10   30.10
   4 -13  -1  937.41   24.50
   4 -13  -1  869.81   24.20
   4  13  -1  975.40   31.40
   4  13  -1  962.70   29.00
   4  13  -1  972.20   29.50
   4  13  -1  945.01   30.80
  -3 -13   1  188.98   15.20
  -3 -13   1  212.48   16.70
  -3 -13   1  184.38   14.80
  -3 -13   1  214.48   14.50
  -3 -13   1  206.58   14.30
  -3 -13   1  196.68   14.40
   3 -13  -1  199.58    9.00
   3 -13  -1  206.08    9.80
   3  13  -1  215.58   15.30
   3  13  -1  218.78   13.40
   3  13  -1  182.88   12.00
   3  13  -1  208.38   15.40
   2 -13  -1  410.26   15.10
   2 -13  -1  437.96   14.30
   2 -13  -1  377.96   12.70
  -2 -13   1  430.66   17.50
  -2 -13   1  412.86   17.90
  -2 -13   1  425.56   19.20
  -2 -13   1  410.56   18.20
  -2 -13   1  421.36   17.30
  -2 -13   1  413.06   16.90
   2  13  -1  426.46   17.90
   2  13  -1  423.86   15.50
   1 -13  -1  366.96   13.60
  -1 -13   1  393.76   15.70
  -1 -13   1  420.16   16.10
  -1 -13   1  396.66   17.60
   1 -13  -1  385.76   15.10
   1 -13  -1  396.86   16.20
  -1 -13   1  434.66   17.20
  -1 -13   1  400.96   15.20
  -1 -13   1  405.56   16.40
   0 -13   1   78.79    6.90
   0 -13   1   74.19    7.00
   0 -13  -1   74.09    8.80
   0 -13  -1   67.49    7.60
   0 -13  -1   76.39    8.20
   0 -13  -1   62.99    7.80
   0 -13   1   74.09    6.60
   0 -13  -1   66.49    7.10
   0 -13   1   65.79    7.80
   0 -13   1   73.89    7.40
   0 -13  -1   80.29    8.70
   0 -13   1   71.99    6.00
   1 -13   1  105.19    9.30
   1 -13   1  102.59    8.00
  -1 -13  -1  109.19    9.70
  -1 -13  -1  110.99    9.30
   1 -13   1  109.49    8.80
  -1 -13  -1  113.09    9.90
   1 -13   1  100.49    7.80
  -1 -13  -1  108.69    9.70
  -1 -13  -1  103.99   11.60
  -1 -13  -1   99.79   10.50
   1  13   1  108.49    8.20
  -2 -13  -1   13.00    7.60
  -2 -13  -1    4.40    7.30
  -2 -13  -1   16.00    7.40
  -2 -13  -1   14.10    8.10
  -2 -13  -1   14.30    7.50
  -2 -13  -1    9.60    8.50
   2  13   1    4.00    7.00
   2  13   1   15.80    5.90
  -3 -13  -1   58.79    9.00
  -3 -13  -1   57.09    9.00
  -3 -13  -1   69.29   10.10
  -3 -13  -1   53.79    9.40
  -3 -13  -1   61.89   10.70
  -3 -13  -1   64.59   10.00
   3  13   1   54.39    8.70
   3  13   1   54.59    7.40
  -4 -13  -1   10.30    8.60
  -4 -13  -1    6.80    8.80
  -4 -13  -1    5.80    8.10
  -4 -13  -1   -3.20    9.50
  -4 -13  -1    9.40    8.80
  -4 -13  -1   14.20    8.30
   4  13   1    0.80    8.10
   4  13   1    1.00    7.00
  -5 -13  -1   74.79   11.20
  -5 -13  -1   64.59   11.00
  -5 -13  -1   87.99   11.10
  -5 -13  -1   63.19   11.40
  -5 -13  -1   66.19   11.60
  -5 -13  -1   62.69   13.00
   5  13   1   69.69   12.30
   5  13   1   72.39    9.70
   5  13   1   75.89   11.10
  -6 -13  -1  148.39   15.40
   6 -13   1  121.09   11.40
  -6 -13  -1  150.58   15.10
  -6 -13  -1  144.89   17.00
   6 -13   1  122.29    9.40
  -6 -13  -1  142.29   14.10
  -6 -13  -1  130.89   14.20
   6 -13   1  124.29    9.50
  -6 -13  -1  128.69   13.30
   6  13   1  139.79   13.80
   6  13   1  147.99   15.40
   6  13   1  150.38   13.30
   7 -13   1   13.00    7.90
  -7 -13  -1   25.40   15.40
  -7 -13  -1   19.10   12.40
   7 -13   1   16.50    7.00
  -7 -13  -1   29.80   13.40
   7 -13   1   26.00    7.20
  -7 -13  -1   18.90    9.00
  -7 -13  -1   11.30   12.80
  -7 -13  -1   14.20   13.20
   7  13   1   16.40   14.00
   7  13   1   15.50   11.10
   7  13   1   11.00   12.20
  -8 -13  -1   -3.50   14.50
   8 -13   1    4.90    8.40
  -8 -13  -1    9.40   13.60
  -8 -13  -1    0.80   13.80
  -8 -13  -1   -1.70   12.60
   8 -13   1   29.20    9.50
   8 -13   1   14.80    8.20
  -8 -13  -1   15.30   16.80
   8  13   1    5.50   12.10
   8  13   1    8.30   12.90
   8  13   1   22.20   15.30
  -9 -13  -1  268.07   27.70
  -9 -13  -1  308.27   33.10
  -9 -13  -1  242.58   22.40
   9 -13   1  221.28   18.60
  -9 -13  -1  247.28   21.80
  -9 -13  -1  231.38   21.90
  -9 -13  -1  221.58   24.40
   9 -13   1  222.38   17.00
   9 -13   1  173.18   19.60
  -9  13  -1  211.58   13.20
   9  13   1  217.68   19.90
   9  13   1  190.68   20.60
 -10 -13  -1  247.68   25.30
 -10 -13  -1  285.07   30.20
  10 -13   1  214.38   21.70
 -10 -13  -1  226.98   22.90
 -10 -13  -1  256.67   28.50
 -10 -13  -1  257.07   24.30
  10 -13   1  216.58   20.90
 -10 -13  -1  198.38   26.30
  10 -13   1  243.58   20.40
 -10  13  -1  200.08   15.10
  10  13   1  187.38   23.40
  10  13   1  216.78   20.50
  10  13   1  199.78   22.10
  10 -14  -1   62.39   12.00
 -10 -14   1   60.89   17.00
 -10 -14   1   51.79   17.50
  10 -14  -1   51.19   12.10
 -10 -14   1   46.20   16.40
  10 -14  -1   22.40   12.40
  10 -14  -1   60.29   12.90
 -10 -14   1   25.10   21.30
 -10 -14   1   17.00   17.90
 -10 -14   1   60.59   18.60
  10  14  -1   47.10   16.90
  10  14  -1   35.60   16.50
  10  14  -1   30.20   16.50
 -10  14   1   51.49    8.80
  10  14  -1    8.70   18.40
   9 -14  -1   60.19   10.00
  -9 -14   1   53.69   16.70
  -9 -14   1   67.89   15.90
   9 -14  -1   72.09   11.30
  -9 -14   1   53.89   15.00
  -9 -14   1   66.59   18.60
  -9 -14   1   59.89   16.50
   9 -14  -1   75.39   11.10
   9 -14  -1   66.69   11.80
   9  14  -1   71.99   17.10
   9  14  -1   60.69   15.60
  -9  14   1   68.29    7.90
   9  14  -1   45.50   16.70
  -8 -14   1   98.39   15.70
  -8 -14   1   96.89   18.40
   8 -14  -1   96.09   10.30
   8 -14  -1  104.09    9.90
  -8 -14   1   99.29   15.90
  -8 -14   1  117.89   17.60
   8 -14  -1   99.09   10.10
   8 -14  -1  107.39   11.20
  -8 -14   1   84.39   15.50
   8  14  -1   70.89   15.90
   8  14  -1   86.89   14.60
   8  14  -1   91.99   17.10
   8  14  -1   82.89   14.50
  -7 -14   1  201.88   22.50
  -7 -14   1  212.78   19.80
  -7 -14   1  212.08   23.10
   7 -14  -1  196.78   14.60
  -7 -14   1  192.78   21.80
   7 -14  -1  201.18   13.30
  -7 -14   1  250.57   23.70
   7 -14  -1  232.68   14.00
   7 -14  -1  204.78   13.00
   7  14  -1  186.68   17.80
   7  14  -1  201.88   17.10
   7  14  -1  226.08   20.30
   7  14  -1  216.28   21.00
   6 -14  -1  105.49    9.80
   6 -14  -1  103.89   11.20
  -6 -14   1  100.79   13.30
  -6 -14   1  113.99   13.40
   6 -14  -1   89.99    9.30
  -6 -14   1  108.19   12.90
   6 -14  -1  106.89   10.60
  -6 -14   1   96.99   13.50
  -6 -14   1   76.19   14.70
  -6 -14   1  113.89   14.20
   6  14  -1  112.69   13.80
   6  14  -1  102.69   13.80
   6  14  -1   89.19   12.20
   6  14  -1  102.19   11.80
   5 -14  -1  452.25   14.60
   5 -14  -1  432.46   15.10
  -5 -14   1  453.05   23.40
  -5 -14   1  469.95   22.10
   5 -14  -1  430.86   14.20
  -5 -14   1  458.65   25.20
  -5 -14   1  483.45   22.60
  -5 -14   1  493.75   22.90
  -5 -14   1  478.55   22.00
   5 -14  -1  430.86   15.50
   5  14  -1  468.45   23.30
   5  14  -1  469.45   20.30
   5  14  -1  447.86   21.40
   5  14  -1  496.25   24.00
   4 -14  -1  166.58    7.00
  -4 -14   1  174.38   16.60
   4 -14  -1  152.98    7.50
  -4 -14   1  172.38   15.20
  -4 -14   1  149.99   15.30
   4 -14  -1  164.48    8.20
  -4 -14   1  166.28   17.70
  -4 -14   1  152.38   15.90
   4 -14  -1  167.58    9.00
  -4 -14   1  145.59   14.80
   4  14  -1  182.38   13.40
   4  14  -1  170.48   16.40
   4  14  -1  171.28   14.20
   4  14  -1  161.08   13.20
  -3 -14   1 2347.07   62.39
  -3 -14   1 2329.47   63.29
   3 -14  -1 2401.86   58.89
   3 -14  -1 2166.48   58.09
   3 -14  -1 2415.16   59.29
  -3 -14   1 2290.57   62.39
  -3 -14   1 2317.47   62.69
  -3 -14   1 2384.16   64.19
  -3 -14   1 2331.77   62.89
   3  14  -1 2307.57   62.79
   3  14  -1 2324.37   62.79
   3  14  -1 2406.56   61.49
   3  14  -1 2389.36   61.09
   2 -14  -1  423.86   14.90
  -2 -14   1  378.56   17.30
  -2 -14   1  387.66   16.90
   2 -14  -1  368.06   12.50
  -2 -14   1  385.66   18.70
  -2 -14   1  391.66   17.00
  -2 -14   1  374.86   16.40
   2 -14  -1  422.26   14.00
  -2 -14   1  407.76   17.70
   2  14  -1  376.96   17.00
   2  14  -1  401.96   14.70
  -1 -14   1 1233.98   34.40
  -1 -14   1 1243.18   34.70
   1 -14  -1 1256.87   34.20
   1 -14  -1 1234.38   34.70
  -1 -14   1 1187.48   34.00
   1 -14  -1 1229.78   33.80
   1 -14  -1 1231.38   33.80
  -1 -14   1 1262.47   35.40
   1 -14  -1 1250.17   34.00
  -1 -14   1 1251.47   35.70
  -1 -14   1 1241.78   34.80
   1 -14  -1 1198.68   32.90
   0 -14   1  471.85   15.00
   0 -14   1  437.46   15.40
   0 -14   1  464.65   16.10
   0 -14   1  469.05   17.10
   0 -14  -1  446.26   18.30
   0 -14   1  448.66   15.80
   0 -14  -1  421.96   17.00
   0 -14  -1  465.45   17.40
   0 -14  -1  426.46   16.10
   0 -14  -1  464.95   18.10
   0 -14   1  463.15   16.60
   0 -14  -1  432.86   17.10
  -1 -14  -1 2092.59   56.09
   1 -14   1 2111.59   53.29
  -1 -14  -1 2155.18   57.19
   1 -14   1 2063.79   52.69
  -1 -14  -1 2120.39   56.09
   1 -14   1 2130.69   53.89
  -1 -14  -1 2068.99   55.89
  -1 -14  -1 2102.09   55.49
   1 -14   1 2044.40   53.19
  -1 -14  -1 2103.29   56.49
   1 -14   1 2118.69   53.69
   1 -14   1 2083.09   52.49
   1  14   1 2130.39   53.19
  -2 -14  -1 1163.98   35.40
  -2 -14  -1 1120.19   34.80
  -2 -14  -1 1169.48   34.90
  -2 -14  -1 1141.49   36.00
  -2 -14  -1 1156.48   34.40
  -2 -14  -1 1154.88   34.50
   2  14   1 1188.08   33.60
   2  14   1 1203.88   32.40
  -3 -14  -1 2178.38   60.19
  -3 -14  -1 2179.88   59.89
  -3 -14  -1 2251.67   60.89
  -3 -14  -1 2200.28   61.69
  -3 -14  -1 2198.68   59.99
  -3 -14  -1 2221.88   60.49
   3  14   1 2221.08   59.29
   3  14   1 2195.88   58.29
  -4 -14  -1  752.32   27.60
  -4 -14  -1  724.53   28.00
  -4 -14  -1  733.33   27.00
  -4 -14  -1  703.73   27.40
  -4 -14  -1  726.33   26.90
  -4 -14  -1  722.43   29.30
   4  14   1  749.73   26.50
   4  14   1  736.93   24.80
  -5 -14  -1  970.60   33.40
  -5 -14  -1  955.40   34.90
  -5 -14  -1  964.60   34.00
  -5 -14  -1  975.70   36.60
  -5 -14  -1  913.61   34.00
  -5 -14  -1  942.51   33.40
   5  14   1  948.81   31.70
   5  14   1  987.20   35.20
   5  14   1  970.20   32.90
  -6 -14  -1  583.94   27.70
  -6 -14  -1  606.64   31.60
  -6 -14  -1  629.24   29.30
   6 -14   1  581.74   18.50
  -6 -14  -1  631.34   28.90
   6 -14   1  555.24   19.60
  -6 -14  -1  660.83   27.80
   6 -14   1  571.94   18.20
  -6 -14  -1  594.34   28.30
   6  14   1  633.54   26.00
   6  14   1  633.04   30.10
   6  14   1  613.84   27.20
  -7 -14  -1 1068.39   39.00
  -7 -14  -1 1089.89   40.20
  -7 -14  -1 1011.70   38.10
  -7 -14  -1 1055.49   42.70
   7 -14   1  931.51   30.40
  -7 -14  -1 1052.49   39.70
   7 -14   1  992.60   29.70
   7 -14   1  959.80   29.50
   7  14   1 1020.00   36.10
   7  14   1 1010.40   39.90
   7  14   1 1074.59   38.20
   8 -14   1   50.89    9.80
  -8 -14  -1   50.39   16.00
   8 -14   1   57.69    9.20
  -8 -14  -1   36.60   18.00
   8 -14   1   51.89    9.20
  -8 -14  -1   67.89   15.70
  -8 -14  -1   58.29   16.70
  -8 -14  -1   53.49   16.40
   8  14   1   40.50   15.00
   8  14   1   38.50   12.90
   8  14   1   56.99   16.30
  -9 -14  -1  355.96   35.20
  -9 -14  -1  311.77   28.30
  -9 -14  -1  307.27   27.90
   9 -14   1  227.98   19.80
  -9 -14  -1  283.97   29.20
   9 -14   1  266.47   19.40
  -9 -14  -1  248.08   23.40
  -9 -14  -1  311.87   30.40
   9 -14   1  271.37   17.80
   9  14   1  287.77   27.80
   9  14   1  246.28   22.80
  10 -14   1   49.20   12.40
 -10 -14  -1   27.90   22.70
  10 -14   1   38.70   12.20
 -10 -14  -1   37.10   17.90
 -10 -14  -1   27.80   17.90
 -10 -14  -1   54.19   19.80
 -10 -14  -1   25.50   17.80
 -10 -14  -1   36.60   19.10
  10 -14   1   35.40   11.90
  10  14   1   41.00   19.30
  10  14   1   15.60   16.50
  10  14   1   53.49   16.70
 -10 -15   1   26.50   18.20
  10 -15  -1   -2.90   11.20
  10 -15  -1  -19.70   11.40
 -10 -15   1   30.00   21.70
 -10 -15   1   10.10   16.30
  10 -15  -1    1.30   10.90
  10 -15  -1   -0.70   10.40
 -10 -15   1  -17.40   15.70
 -10 -15   1  -17.90   16.60
 -10 -15   1    6.30   17.20
  10  15  -1    3.60   16.40
  10  15  -1   -3.10   18.10
  10  15  -1  -18.30   17.70
  10  15  -1    1.90   15.90
  -9 -15   1  805.42   37.10
   9 -15  -1  768.32   27.80
   9 -15  -1  800.42   28.90
  -9 -15   1  844.22   39.40
   9 -15  -1  776.22   28.50
  -9 -15   1  865.01   43.20
  -9 -15   1  809.02   38.60
   9 -15  -1  775.82   29.70
  -9 -15   1  832.72   38.00
   9  15  -1  802.62   40.00
   9  15  -1  791.62   38.70
   9  15  -1  839.62   36.80
  -8 -15   1   37.90   14.40
  -8 -15   1   27.10   17.40
  -8 -15   1   28.60   14.10
   8 -15  -1   52.59    9.20
   8 -15  -1   70.59    9.60
  -8 -15   1   45.90   14.70
   8 -15  -1   52.09   10.20
  -8 -15   1   34.40   15.30
   8 -15  -1   63.49    9.10
   8  15  -1   53.99   16.90
   8  15  -1   60.09   14.00
   8  15  -1   25.00   14.80
   8  15  -1   53.89   14.20
  -7 -15   1  551.64   30.40
  -7 -15   1  585.04   29.60
  -7 -15   1  609.34   33.50
   7 -15  -1  556.44   20.40
   7 -15  -1  584.34   21.60
  -7 -15   1  619.04   30.10
   7 -15  -1  581.84   20.00
   7 -15  -1  581.54   20.60
  -7 -15   1  573.54   28.90
   7  15  -1  603.04   28.30
   7  15  -1  631.74   27.10
   7  15  -1  575.94   31.00
   7  15  -1  612.34   30.70
  -6 -15   1   19.70   11.60
   6 -15  -1   17.90    6.50
   6 -15  -1   25.00    6.20
  -6 -15   1   15.60   12.10
  -6 -15   1   23.70   11.30
  -6 -15   1   11.50   10.90
  -6 -15   1   16.80   11.60
   6 -15  -1   11.90    5.90
   6 -15  -1    2.70    5.40
  -6 -15   1   14.80   13.30
   6  15  -1   14.70    9.80
   6  15  -1   12.40   12.10
   6  15  -1   16.90   11.00
   6  15  -1   20.50   11.90
  -5 -15   1  347.27   24.30
  -5 -15   1  341.77   22.00
  -5 -15   1  355.96   21.20
  -5 -15   1  372.66   20.60
   5 -15  -1  326.07   12.10
   5 -15  -1  302.17   11.60
  -5 -15   1  356.26   20.70
   5 -15  -1  298.87   12.90
  -5 -15   1  327.07   20.90
   5  15  -1  341.17   19.40
   5  15  -1  349.07   18.40
   5  15  -1  356.46   21.80
   5  15  -1  343.07   22.20
   4 -15  -1   87.99    6.10
  -4 -15   1   81.09   12.00
   4 -15  -1   79.09    6.70
  -4 -15   1   92.69   11.00
  -4 -15   1   94.89   11.40
  -4 -15   1   78.79   10.40
  -4 -15   1   94.09   11.20
  -4 -15   1   91.79   10.60
   4 -15  -1   81.69    8.10
   4  15  -1   91.99   10.20
   4  15  -1   88.69    9.40
   4  15  -1  101.19   12.20
   4  15  -1   70.19   11.00
  -3 -15   1  636.14   23.00
  -3 -15   1  630.34   22.80
   3 -15  -1  625.04   18.10
   3 -15  -1  639.74   18.90
  -3 -15   1  623.74   22.80
   3 -15  -1  563.24   17.40
  -3 -15   1  653.43   24.00
  -3 -15   1  651.43   25.10
  -3 -15   1  630.74   23.50
   3  15  -1  615.64   21.30
  -2 -15   1    7.80    7.00
   2 -15  -1    2.50    5.50
   2 -15  -1    7.30    4.20
  -2 -15   1    1.90    6.60
  -2 -15   1    9.50    6.70
  -2 -15   1    2.60    6.90
  -2 -15   1    3.30    8.00
  -2 -15   1    2.70    7.40
   2 -15  -1    3.80    5.00
   2  15  -1    6.20    5.40
   1 -15  -1  624.24   20.40
  -1 -15   1  633.94   21.60
   1 -15  -1  661.33   21.10
   1 -15  -1  634.14   20.40
  -1 -15   1  651.73   20.80
  -1 -15   1  639.44   21.10
  -1 -15   1  661.73   22.80
   1 -15  -1  648.04   19.60
   1 -15  -1  672.23   21.70
  -1 -15   1  655.53   21.30
  -1 -15   1  639.74   22.20
   1 -15  -1  672.83   20.90
   0 -15   1   45.50    6.90
   0 -15  -1   44.20    7.10
   0 -15   1   52.89    7.40
   0 -15  -1   52.99    7.20
   0 -15   1   48.30    6.70
   0 -15  -1   39.70    7.20
   0 -15  -1   37.50    7.90
   0 -15   1   46.70    6.10
   0 -15  -1   44.30    6.60
   0 -15   1   39.40    6.10
   0 -15   1   45.70    5.80
   0 -15  -1   43.10    7.80
   1 -15   1  156.98    9.80
   1 -15   1  147.39    8.30
  -1 -15  -1  158.18   14.40
  -1 -15  -1  180.48   14.00
   1 -15   1  166.48    9.30
  -1 -15  -1  157.38   13.30
   1 -15   1  166.18    7.70
  -1 -15  -1  162.78   12.30
  -1 -15  -1  159.48   12.90
   1 -15   1  167.88   10.40
  -1 -15  -1  163.98   12.80
   1 -15   1  165.68    9.00
  -2 -15  -1   13.50    8.50
  -2 -15  -1   14.30    7.70
  -2 -15  -1   12.30    7.80
  -2 -15  -1   12.00    7.60
  -2 -15  -1    8.50    7.50
  -2 -15  -1   13.70    8.10
   2  15   1   22.20    5.60
  -3 -15  -1   85.19   11.80
  -3 -15  -1   77.79   10.40
  -3 -15  -1   79.09   10.10
  -3 -15  -1   82.49   10.20
  -3 -15  -1   69.49    9.80
  -3 -15  -1   76.29    9.80
   3  15   1   72.19    9.40
   3  15   1   81.39    8.20
  -4 -15  -1   25.20    9.80
  -4 -15  -1   18.40    9.50
  -4 -15  -1   31.60   10.10
  -4 -15  -1    9.40    9.50
  -4 -15  -1   14.00   10.10
  -4 -15  -1   25.00   11.40
   4  15   1   24.50    8.40
   4  15   1   28.90    9.60
  -5 -15  -1   50.99   11.60
  -5 -15  -1   67.39   12.00
  -5 -15  -1   59.29   12.90
  -5 -15  -1   42.60   13.40
  -5 -15  -1   46.70   11.80
  -5 -15  -1   59.19   12.10
   5  15   1   50.39   10.10
   5  15   1   49.30   11.30
  -6 -15  -1   -6.30   14.10
   6 -15   1   -5.80    4.90
  -6 -15  -1   -1.20   11.50
  -6 -15  -1  -12.40   12.30
  -6 -15  -1    6.30   11.90
   6 -15   1   -2.90    4.80
  -6 -15  -1   13.40   11.60
  -6 -15  -1  -11.40   12.40
   6 -15   1    5.10    5.70
   6  15   1    0.00   12.40
   6  15   1    2.70   11.30
   6  15   1    7.30   10.50
  -7 -15  -1  -10.50   12.80
  -7 -15  -1   27.30   16.10
  -7 -15  -1   28.10   13.50
   7 -15   1   26.10    6.80
  -7 -15  -1   24.70   13.90
   7 -15   1   21.90    7.40
   7 -15   1   11.00    6.70
  -7 -15  -1    5.20   12.50
   7  15   1   15.40   11.70
   7  15   1   27.70   13.10
   7  15   1    0.60   13.90
  -8 -15  -1   18.30   15.20
  -8 -15  -1   21.20   15.40
   8 -15   1   -2.50    8.10
  -8 -15  -1   -6.10   16.90
  -8 -15  -1  -10.70   14.50
   8 -15   1    6.60    7.90
   8 -15   1   -3.80    8.30
  -8 -15  -1   -3.60   13.80
   8  15   1    2.90    9.10
   8  15   1    7.20   13.80
   8  15   1   -3.00   15.00
  -9 -15  -1  341.77   28.50
  -9 -15  -1  311.27   31.40
  -9 -15  -1  324.87   35.90
  -9 -15  -1  337.17   30.10
   9 -15   1  238.68   19.00
   9 -15   1  264.67   19.40
  -9 -15  -1  277.27   28.90
   9 -15   1  261.67   17.80
  -9 -15  -1  298.67   31.30
   9  15   1  321.37   32.40
   9  15   1  286.47   28.50
   9  15   1  296.17   31.90
 -10 -15  -1   16.90   19.70
 -10 -15  -1    4.60   22.20
 -10 -15  -1    8.00   18.40
 -10 -15  -1   15.80   17.90
 -10 -15  -1   -4.00   17.80
  10 -15   1  -12.00   12.10
 -10 -15  -1   -3.20   19.20
  10 -15   1   -3.50   10.80
  10 -15   1    8.60   11.30
  10  15   1  -38.10   18.70
  10  15   1    5.80   17.00
  10  15   1  -13.00   16.60
  10 -16  -1   27.70   11.10
 -10 -16   1   32.10   17.70
  10 -16  -1   24.40   11.60
 -10 -16   1   -9.20   21.30
  10 -16  -1   20.60   11.90
  10 -16  -1   12.70   11.80
 -10 -16   1   53.69   18.50
 -10 -16   1   11.40   19.30
 -10 -16   1   47.80   18.10
 -10 -16   1   27.80   18.30
  10  16  -1   33.50   19.80
  10  16  -1   24.50   17.30
  10  16  -1   -9.60   18.80
  10  16  -1   23.70   17.10
   9 -16  -1  118.89   11.40
  -9 -16   1  108.19   18.40
  -9 -16   1   96.09   21.70
  -9 -16   1   96.59   18.70
  -9 -16   1   79.49   18.50
   9 -16  -1  111.79   11.70
   9 -16  -1  104.39   12.00
   9 -16  -1  116.69   12.00
  -9 -16   1  117.09   18.10
   9  16  -1  100.19   19.80
   9  16  -1  114.69   17.30
   9  16  -1  108.29   17.50
   8 -16  -1   81.39    9.30
   8 -16  -1   89.49    9.60
   8 -16  -1  106.59   10.80
  -8 -16   1   83.39   16.10
  -8 -16   1   71.69   19.10
  -8 -16   1   93.49   15.50
   8 -16  -1   86.19    9.80
  -8 -16   1   76.09   16.70
  -8 -16   1   78.19   16.10
   8  16  -1   73.69   17.50
   8  16  -1   82.49   15.20
   8  16  -1   59.29   15.10
   8  16  -1   67.19   16.30
   7 -16  -1  296.27   14.90
  -7 -16   1  288.57   29.20
   7 -16  -1  311.77   14.70
  -7 -16   1  319.97   26.50
   7 -16  -1  290.87   15.80
  -7 -16   1  310.07   24.70
  -7 -16   1  323.87   25.20
  -7 -16   1  317.67   24.80
   7 -16  -1  281.37   14.20
   7  16  -1  303.07   23.40
   7  16  -1  314.67   27.10
   7  16  -1  341.17   26.40
   7  16  -1  283.07   22.30
  -6 -16   1  230.48   22.50
  -6 -16   1  240.38   23.40
  -6 -16   1  201.78   21.30
  -6 -16   1  244.98   21.40
   6 -16  -1  219.78   11.70
  -6 -16   1  171.38   16.50
   6 -16  -1  219.48   11.50
   6 -16  -1  196.28   11.10
   6 -16  -1  218.48   12.50
  -6 -16   1  236.68   25.80
   6  16  -1  237.28   23.00
   6  16  -1  249.28   20.40
   6  16  -1  248.48   19.00
   6  16  -1  237.68   23.90
  -5 -16   1  679.83   28.20
   5 -16  -1  626.94   19.90
   5 -16  -1  640.44   19.00
  -5 -16   1  669.23   29.10
  -5 -16   1  667.23   30.90
  -5 -16   1  684.43   28.20
   5 -16  -1  643.84   19.50
  -5 -16   1  669.83   27.70
  -5 -16   1  676.93   27.60
   5  16  -1  724.73   26.60
   5  16  -1  672.23   28.60
   5  16  -1  682.13   29.00
   5  16  -1  637.74   24.90
   4 -16  -1    0.40    4.30
  -4 -16   1    3.40    9.70
  -4 -16   1   14.50    9.80
  -4 -16   1    1.90    9.00
   4 -16  -1   10.50    4.90
  -4 -16   1    1.00    8.90
  -4 -16   1   15.00    9.00
  -4 -16   1    3.50   10.70
   4  16  -1   14.60   10.20
   4  16  -1    4.90    8.50
   4  16  -1    1.30    7.60
  -3 -16   1  799.22   27.40
  -3 -16   1  767.52   26.90
  -3 -16   1  821.12   28.30
  -3 -16   1  829.72   27.70
  -3 -16   1  807.02   28.00
   3 -16  -1  766.42   22.10
   3 -16  -1  830.32   22.60
   3 -16  -1  822.22   23.40
  -3 -16   1  801.42   29.60
   3  16  -1  819.82   25.60
  -2 -16   1  232.48   14.40
   2 -16  -1  221.68   10.40
  -2 -16   1  255.27   14.80
   2 -16  -1  250.57   11.60
  -2 -16   1  252.97   14.90
   2 -16  -1  244.58   12.60
   2 -16  -1  256.77   11.70
  -2 -16   1  241.28   16.90
  -2 -16   1  252.77   15.20
  -2 -16   1  244.68   15.80
  -1 -16   1 1477.85   41.10
  -1 -16   1 1476.65   42.00
  -1 -16   1 1439.96   40.70
   1 -16  -1 1547.35   41.20
   1 -16  -1 1497.25   40.10
   1 -16  -1 1468.85   39.50
   1 -16  -1 1491.35   40.30
  -1 -16   1 1474.45   41.50
   1 -16  -1 1500.15   40.60
  -1 -16   1 1467.25   40.80
  -1 -16   1 1481.05   40.50
   1 -16  -1 1462.15   40.00
   0 -16  -1   -0.50    6.00
   0 -16   1   10.50    6.60
   0 -16   1    8.30    5.00
   0 -16  -1   -2.10    7.10
   0 -16   1    7.80    5.50
   0 -16   1    7.10    6.00
   0 -16  -1    6.50    7.00
   0 -16  -1   -1.60    6.00
   0 -16   1   12.90    5.90
   0 -16  -1   -0.70    6.60
   0 -16   1    6.10    5.40
   0 -16  -1   -3.70    5.90
  -1 -16  -1 1532.95   41.80
   1 -16   1 1520.75   39.70
   1 -16   1 1535.05   40.10
   1 -16   1 1450.75   38.80
   1 -16   1 1475.85   39.10
   1 -16   1 1484.05   38.50
  -1 -16  -1 1518.55   42.20
  -1 -16  -1 1530.85   43.50
  -1 -16  -1 1398.46   42.40
  -1 -16  -1 1478.15   42.00
  -1 -16  -1 1527.05   42.40
   1 -16   1 1509.45   39.30
  -2 -16  -1  521.65   21.30
  -2 -16  -1  501.05   20.70
  -2 -16  -1  506.55   23.00
  -2 -16  -1  525.15   20.90
  -2 -16  -1  528.25   21.90
  -2 -16  -1  505.85   21.20
   2  16   1  523.75   17.30
  -3 -16  -1  997.20   33.20
  -3 -16  -1 1013.90   32.90
  -3 -16  -1 1006.80   33.80
  -3 -16  -1 1015.50   33.10
  -3 -16  -1 1014.10   33.40
  -3 -16  -1  987.70   35.10
   3  16   1 1020.80   32.00
   3  16   1 1038.30   30.30
  -4 -16  -1   44.20   10.50
  -4 -16  -1   33.70   11.00
  -4 -16  -1   50.19   10.80
  -4 -16  -1   41.20   12.30
  -4 -16  -1   41.50   11.10
  -4 -16  -1   42.20   10.70
   4  16   1   38.70   10.10
   4  16   1   33.80    8.70
  -5 -16  -1 2012.90   59.49
  -5 -16  -1 2047.60   59.49
  -5 -16  -1 2052.99   60.19
  -5 -16  -1 2061.59   59.79
  -5 -16  -1 2123.19   61.19
  -5 -16  -1 2034.60   62.29
   5  16   1 2044.90   58.69
   5  16   1 2055.09   57.39
  -6 -16  -1  200.68   17.00
  -6 -16  -1  198.78   21.60
  -6 -16  -1  189.38   16.90
   6 -16   1  173.58    9.60
   6 -16   1  174.38    9.50
  -6 -16  -1  201.68   18.20
  -6 -16  -1  164.28   18.60
  -6 -16  -1  194.78   18.30
   6  16   1  210.98   21.00
   6  16   1  186.38   19.00
   7 -16   1 1005.00   31.40
   7 -16   1 1063.49   31.30
  -7 -16  -1 1105.29   42.60
   7 -16   1 1046.70   31.20
  -7 -16  -1 1195.78   45.90
  -7 -16  -1 1142.59   41.40
  -7 -16  -1 1189.68   41.90
  -7 -16  -1 1113.59   42.20
   7  16   1 1108.99   40.50
   7  16   1 1202.08   39.40
  -8 -16  -1   11.10   15.60
  -8 -16  -1  -11.80   14.70
  -8 -16  -1   16.00   19.00
  -8 -16  -1   21.20   15.80
   8 -16   1    2.20    8.10
  -8 -16  -1   11.00   15.30
   8 -16   1   13.70    7.90
   8 -16   1   -6.40    8.00
   8  16   1   10.20   15.30
   8  16   1    6.80   14.00
   8  16   1    4.90    9.50
  -9 -16  -1  782.32   40.90
  -9 -16  -1  764.32   44.90
   9 -16   1  778.02   27.40
  -9 -16  -1  825.82   38.30
   9 -16   1  747.53   28.40
  -9 -16  -1  788.42   38.80
  -9 -16  -1  764.02   41.00
  -9 -16  -1  754.42   37.40
   9 -16   1  722.93   27.90
   9  16   1  819.42   41.30
   9  16   1  783.72   37.50
   9  16   1  814.32   35.90
  -9 -17   1  152.48   20.00
   9 -17  -1  177.98   15.80
  -9 -17   1  192.28   21.90
  -9 -17   1  152.38   21.20
   9 -17  -1  172.88   17.60
  -9 -17   1  178.68   23.70
   9 -17  -1  175.28   17.90
  -9 -17   1  179.78   20.10
   9 -17  -1  205.98   16.30
  -9 -17   1  177.48   20.50
   9  17  -1  160.88   21.50
   9  17  -1  196.38   20.20
   8 -17  -1  266.77   15.60
  -8 -17   1  257.07   28.00
  -8 -17   1  331.57   28.50
  -8 -17   1  297.37   32.00
   8 -17  -1  298.67   16.70
   8 -17  -1  279.77   15.70
   8 -17  -1  277.17   17.30
  -8 -17   1  326.27   28.20
  -8 -17   1  259.27   26.70
   8  17  -1  309.57   29.90
   8  17  -1  371.56   27.00
   8  17  -1  300.47   28.70
   8  17  -1  282.47   25.10
  -7 -17   1  726.13   36.50
  -7 -17   1  736.43   32.00
  -7 -17   1  683.73   32.40
  -7 -17   1  697.33   33.20
  -7 -17   1  717.53   32.80
   7 -17  -1  685.93   22.80
   7 -17  -1  672.73   23.10
   7 -17  -1  677.93   22.40
  -7 -17   1  650.23   33.30
   7  17  -1  729.13   34.20
   7  17  -1  718.53   31.40
   7  17  -1  693.23   33.80
   7  17  -1  731.03   29.70
   6 -17  -1  198.08   11.60
  -6 -17   1  213.78   22.50
  -6 -17   1  274.07   26.70
  -6 -17   1  231.88   22.20
  -6 -17   1  294.47   22.80
  -6 -17   1  276.27   24.40
  -6 -17   1  226.58   22.20
   6 -17  -1  228.48   12.30
   6 -17  -1  218.18   12.70
   6  17  -1  269.77   21.00
   6  17  -1  268.17   19.60
   6  17  -1  210.88   23.10
   6  17  -1  274.87   23.90
  -5 -17   1  201.98   20.20
   5 -17  -1  193.78    9.60
   5 -17  -1  193.88   10.20
  -5 -17   1  210.98   20.10
  -5 -17   1  216.88   20.80
  -5 -17   1  208.78   21.50
  -5 -17   1  210.28   20.10
  -5 -17   1  181.08   17.90
   5  17  -1  218.68   17.00
   5  17  -1  201.48   18.70
   5  17  -1  193.58   20.90
   4 -17  -1  463.15   15.30
  -4 -17   1  504.55   23.10
  -4 -17   1  506.85   24.40
  -4 -17   1  466.85   23.20
  -4 -17   1  545.15   24.10
  -4 -17   1  497.35   23.30
  -4 -17   1  530.15   26.20
   4 -17  -1  471.35   15.90
   4  17  -1  482.05   24.10
   4  17  -1  495.45   21.40
  -3 -17   1   65.99   10.10
   3 -17  -1   56.99    6.70
  -3 -17   1   84.59   11.90
   3 -17  -1   58.79    5.90
  -3 -17   1   58.39   10.40
  -3 -17   1   71.09   10.00
  -3 -17   1   69.79   10.80
   3 -17  -1   50.69    5.60
  -3 -17   1   83.49   10.30
   3  17  -1   61.59    8.40
   2 -17  -1  209.08   12.60
   2 -17  -1  219.28   11.60
   2 -17  -1  195.88   12.10
   2 -17  -1  192.48   10.40
  -2 -17   1  217.18   17.00
  -2 -17   1  191.18   14.90
  -2 -17   1  226.78   14.60
   2 -17  -1  183.88   11.50
  -2 -17   1  210.08   14.50
  -2 -17   1  181.78   15.70
  -2 -17   1  200.88   14.60
   1 -17  -1   99.09    9.90
   1 -17  -1   97.99   10.70
   1 -17  -1   95.19    8.30
   1 -17  -1   99.29    8.60
  -1 -17   1  123.19   11.70
   1 -17  -1   97.29    9.20
  -1 -17   1  106.59    9.80
   1 -17  -1  106.69   11.90
  -1 -17   1   94.89   10.10
  -1 -17   1   98.39    9.10
  -1 -17   1  102.39    8.80
  -1 -17   1  112.79    9.60
   0 -17   1   11.70    6.80
   0 -17  -1   -3.10    6.40
   0 -17  -1   14.40    7.30
   0 -17   1   21.60    7.40
   0 -17   1   15.10    6.40
   0 -17  -1   17.40    7.50
   0 -17  -1   17.10    8.10
   0 -17   1   17.80    5.90
   0 -17  -1    7.30    6.50
   0 -17   1   24.20    6.20
   0 -17   1   10.30    5.80
   0 -17  -1   10.20    6.70
   1 -17   1   77.19    6.70
   1 -17   1   90.49    9.90
  -1 -17  -1   74.59   10.50
   1 -17   1   69.59    6.00
  -1 -17  -1   63.59    9.90
   1 -17   1   71.79    7.60
   1 -17   1   72.79    6.50
  -1 -17  -1   76.49    9.30
  -1 -17  -1   75.19    9.10
  -1 -17  -1   80.19    9.50
   1 -17   1   70.29    6.30
  -1 -17  -1   64.19    9.10
   2 -17   1   42.10    5.50
  -2 -17  -1   24.00    9.10
  -2 -17  -1   23.80    9.30
  -2 -17  -1   28.30   10.10
  -2 -17  -1   35.40    9.10
  -2 -17  -1   41.10    8.80
  -2 -17  -1   39.10    9.00
   2 -17   1   48.60    5.40
   2  17   1   39.40    6.20
  -3 -17  -1    0.20   10.50
  -3 -17  -1    0.20    9.00
  -3 -17  -1  -10.00    9.40
  -3 -17  -1   -2.20    9.30
  -3 -17  -1   27.40    9.50
  -3 -17  -1    4.90    9.10
   3  17   1   -1.80    6.80
   3  17   1   14.90    8.70
  -4 -17  -1  244.88   20.50
  -4 -17  -1  268.77   20.20
  -4 -17  -1  253.37   21.10
  -4 -17  -1  234.28   23.40
  -4 -17  -1  251.47   19.90
  -4 -17  -1  233.18   20.40
   4  17   1  235.88   16.50
   4  17   1  258.47   18.90
  -5 -17  -1   21.20   14.10
  -5 -17  -1   36.30   12.10
  -5 -17  -1   35.60   12.10
  -5 -17  -1    6.90   11.90
  -5 -17  -1   16.40   11.50
  -5 -17  -1   14.30   11.30
   5  17   1   10.30   10.70
   5  17   1   15.50   10.00
  -6 -17  -1  100.09   15.40
  -6 -17  -1   97.19   14.50
  -6 -17  -1   86.09   14.20
  -6 -17  -1   83.09   15.20
  -6 -17  -1   64.79   15.40
  -6 -17  -1  113.29   17.40
   6  17   1   84.69   14.00
   6  17   1  104.29   13.50
  -7 -17  -1  141.49   18.50
  -7 -17  -1  150.58   17.40
   7 -17   1  160.28   11.90
  -7 -17  -1  192.08   18.60
  -7 -17  -1  187.68   21.90
  -7 -17  -1  154.88   18.60
   7 -17   1  154.08   11.40
   7  17   1  160.18   16.30
   7  17   1  169.88   17.50
  -8 -17  -1   12.60   15.90
   8 -17   1   14.90    7.70
  -8 -17  -1   28.10   16.10
  -8 -17  -1   40.30   15.90
   8 -17   1   13.40    7.80
  -8 -17  -1   -1.20   18.60
  -8 -17  -1   -0.20   16.20
   8 -17   1   14.10    8.20
   8  17   1    0.70   10.10
   8  17   1   19.80   15.40
  -9 -17  -1   72.59   18.40
   9 -17   1   77.99   10.30
   9 -17   1   74.09   11.50
  -9 -17  -1   80.19   19.00
  -9 -17  -1   92.29   22.60
   9 -17   1   72.29   10.70
  -9 -17  -1   80.79   19.70
  -9 -17  -1   61.99   19.20
  -9 -17  -1   83.89   19.30
   9  17   1  113.89   18.90
   9  17   1   82.99   17.80
   9 -18  -1   16.80    8.80
  -9 -18   1   12.80   17.20
  -9 -18   1   13.50   17.10
  -9 -18   1  -18.80   16.30
   9 -18  -1    4.60    8.80
   9 -18  -1    7.90    9.20
  -9 -18   1  -15.50   17.30
  -9 -18   1   13.10   21.00
   9 -18  -1   23.70   10.10
  -9 -18   1    0.80   15.50
   9  18  -1    6.30   15.90
   9  18  -1   -4.50   16.30
   8 -18  -1   81.39    9.60
  -8 -18   1   60.79   16.50
   8 -18  -1   85.79    9.60
  -8 -18   1   54.69   16.30
   8 -18  -1   79.69    9.60
  -8 -18   1   64.19   16.70
  -8 -18   1   86.59   17.40
  -8 -18   1  105.99   18.00
  -8 -18   1   48.20   18.50
   8  18  -1   96.09   15.60
   8  18  -1   82.79   17.80
   8  18  -1   56.09   15.50
   7 -18  -1  109.89    9.10
  -7 -18   1   84.19   15.80
  -7 -18   1   89.49   16.20
   7 -18  -1   92.19    8.70
   7 -18  -1   99.39    8.80
  -7 -18   1   81.99   15.50
  -7 -18   1   88.79   15.70
  -7 -18   1   84.69   15.70
  -7 -18   1   86.79   18.10
   7  18  -1   97.19   14.90
   7  18  -1  111.69   14.80
   7  18  -1   87.39   16.30
  -6 -18   1  279.97   25.60
  -6 -18   1  250.67   23.50
   6 -18  -1  260.57   12.80
  -6 -18   1  228.58   23.40
   6 -18  -1  239.58   12.20
  -6 -18   1  283.47   24.10
  -6 -18   1  258.57   27.70
  -6 -18   1  307.07   23.80
   6  18  -1  281.27   20.40
   6  18  -1  234.78   24.40
   6  18  -1  284.67   21.90
  -5 -18   1  364.26   23.80
  -5 -18   1  395.46   23.60
  -5 -18   1  336.97   23.00
  -5 -18   1  354.06   23.90
   5 -18  -1  338.47   13.50
  -5 -18   1  352.66   26.90
  -5 -18   1  380.96   23.50
   5  18  -1  375.16   24.50
   5  18  -1  359.76   21.40
   5  18  -1  352.96   19.50
   4 -18  -1  710.53   22.10
  -4 -18   1  818.52   30.20
  -4 -18   1  805.52   29.70
  -4 -18   1  771.12   32.10
  -4 -18   1  796.42   30.20
  -4 -18   1  796.52   30.90
  -4 -18   1  761.82   29.60
   4  18  -1  790.82   27.40
  -3 -18   1   69.39   10.70
  -3 -18   1   83.79   11.00
  -3 -18   1   63.49   10.90
   3 -18  -1   80.19    7.40
   3 -18  -1   76.59    6.50
  -3 -18   1   75.69   11.10
  -3 -18   1   62.59   11.70
   3 -18  -1   82.59    6.70
   3 -18  -1   84.79    8.90
  -3 -18   1   74.89   10.70
   3  18  -1   82.29    8.80
  -2 -18   1  683.13   24.70
  -2 -18   1  676.13   24.40
  -2 -18   1  672.93   26.00
  -2 -18   1  654.43   24.70
   2 -18  -1  713.83   22.50
  -2 -18   1  715.13   25.40
   2 -18  -1  721.63   21.80
   2 -18  -1  687.43   21.20
  -2 -18   1  695.93   27.00
   2 -18  -1  680.13   21.60
   2 -18  -1  705.63   23.00
   1 -18  -1   87.59    8.10
   1 -18  -1   94.49    9.40
  -1 -18   1   81.79    9.50
  -1 -18   1   82.19    9.70
  -1 -18   1   67.09    8.80
  -1 -18   1   77.59    8.80
   1 -18  -1   82.49    8.80
   1 -18  -1   88.29    8.70
   1 -18  -1   78.19    8.30
  -1 -18   1   69.39   10.20
   1 -18  -1   87.19    8.40
  -1 -18   1   79.49    8.70
   0 -18  -1  607.44   21.50
   0 -18   1  572.24   21.80
   0 -18   1  607.14   19.90
   0 -18   1  567.64   20.20
   0 -18   1  587.84   20.50
   0 -18  -1  620.94   22.30
   0 -18  -1  560.54   20.90
   0 -18  -1  591.44   21.60
   0 -18  -1  618.94   22.40
   0 -18   1  581.04   20.20
   0 -18   1  624.74   21.20
   0 -18  -1  604.34   23.20
  -1 -18  -1  276.07   16.90
  -1 -18  -1  245.88   15.80
  -1 -18  -1  260.37   18.70
  -1 -18  -1  270.47   16.50
   1 -18   1  266.07   13.20
   1 -18   1  266.87   12.70
   1 -18   1  245.78   12.10
   1 -18   1  259.77   13.90
   1 -18   1  238.28   12.10
   1 -18   1  249.78   11.30
  -1 -18  -1  243.98   15.90
  -1 -18  -1  269.87   17.80
  -2 -18  -1  850.01   29.50
   2 -18   1  826.52   24.00
  -2 -18  -1  881.41   30.30
   2 -18   1  817.22   23.40
  -2 -18  -1  858.11   29.20
   2 -18   1  859.81   24.40
  -2 -18  -1  861.81   29.80
  -2 -18  -1  863.31   29.60
  -2 -18  -1  898.61   31.60
  -3 -18  -1  255.57   22.10
  -3 -18  -1  225.98   19.50
  -3 -18  -1  241.58   19.20
  -3 -18  -1  240.68   18.20
  -3 -18  -1  239.38   18.60
  -3 -18  -1  223.28   19.40
   3  18   1  245.38   14.50
   3  18   1  241.58   17.00
  -4 -18  -1 1302.07   41.80
  -4 -18  -1 1314.27   42.10
  -4 -18  -1 1295.07   42.60
  -4 -18  -1 1283.37   41.80
  -4 -18  -1 1264.77   42.20
  -4 -18  -1 1273.47   44.60
   4  18   1 1308.87   38.60
   4  18   1 1289.97   40.30
  -5 -18  -1  377.96   24.30
  -5 -18  -1  385.56   25.10
  -5 -18  -1  380.56   25.20
  -5 -18  -1  364.76   26.20
  -5 -18  -1  386.26   28.30
  -5 -18  -1  381.36   24.40
   5  18   1  363.06   23.10
   5  18   1  370.56   20.80
  -6 -18  -1 1594.74   51.49
  -6 -18  -1 1463.35   53.49
  -6 -18  -1 1335.67   49.30
  -6 -18  -1 1649.54   50.89
  -6 -18  -1 1570.74   50.99
  -6 -18  -1 1564.14   50.09
   6  18   1 1563.74   47.60
   6  18   1 1563.14   49.10
  -7 -18  -1  604.74   33.20
   7 -18   1  522.65   18.40
  -7 -18  -1  608.84   32.30
  -7 -18  -1  598.44   33.70
  -7 -18  -1  620.04   32.40
  -7 -18  -1  542.25   29.80
   7 -18   1  550.54   18.80
  -7 -18  -1  597.44   36.70
   7  18   1  521.45   29.80
   7  18   1  429.56   27.30
  -8 -18  -1  806.22   43.50
   8 -18   1  663.83   23.60
  -8 -18  -1  725.83   42.30
   8 -18   1  685.83   24.20
  -8 -18  -1  724.23   36.80
  -8 -18  -1  741.53   36.50
  -8 -18  -1  665.03   37.10
  -8 -18  -1  716.33   37.70
   8  18   1  678.93   34.30
  -9 -18  -1   75.99   19.10
  -9 -18  -1   82.39   23.30
  -9 -18  -1  114.79   21.80
  -9 -18  -1   91.99   19.10
   9 -18   1  104.29   12.00
   9 -18   1  102.69   11.20
  -9 -18  -1   76.19   19.00
  -9 -18  -1   88.59   19.10
   9  18   1   79.49   18.50
   9  18   1   96.39   19.00
   9 -19  -1   34.50    9.70
   9 -19  -1   42.40   11.10
  -9 -19   1   69.59   18.80
  -9 -19   1   40.10   18.00
  -9 -19   1   24.60   17.80
  -9 -19   1   71.79   19.90
  -9 -19   1   12.40   21.20
  -9 -19   1   53.89   19.30
   9 -19  -1   31.40    9.90
   9  19  -1   57.79   21.50
   9  19  -1    0.50   15.60
   9  19  -1   61.59   17.50
  -8 -19   1  269.47   29.20
  -8 -19   1  267.27   25.30
  -8 -19   1  241.18   21.80
   8 -19  -1  257.37   15.20
  -8 -19   1  298.97   28.90
  -8 -19   1  217.28   21.40
  -8 -19   1  258.97   27.70
   8 -19  -1  236.88   15.10
   8 -19  -1  246.28   15.90
   8  19  -1  216.78   21.30
   8  19  -1  230.18   24.40
   8  19  -1  268.77   26.70
  -7 -19   1   22.90   14.90
  -7 -19   1  -15.60   13.10
   7 -19  -1   -5.40    6.60
  -7 -19   1  -12.70   13.50
  -7 -19   1  -26.50   16.00
   7 -19  -1    0.60    6.80
  -7 -19   1   -0.90   14.30
  -7 -19   1    4.20   14.60
   7  19  -1  -14.10   12.40
   7  19  -1    2.70   14.60
   7  19  -1   -6.70   12.80
  -6 -19   1 1123.49   40.80
  -6 -19   1 1144.09   40.70
  -6 -19   1 1134.49   41.10
   6 -19  -1 1075.59   31.70
  -6 -19   1 1168.48   40.90
  -6 -19   1 1155.28   45.00
  -6 -19   1 1174.28   42.80
   6  19  -1 1157.68   39.10
   6  19  -1 1113.19   41.90
   6  19  -1 1175.08   37.60
  -5 -19   1    5.00   11.40
   5 -19  -1    5.70    5.60
  -5 -19   1    4.60   12.10
  -5 -19   1   -3.80   10.90
  -5 -19   1   -5.10   11.30
  -5 -19   1   18.90   11.90
  -5 -19   1    0.20   13.50
   5  19  -1    4.90   10.10
  -4 -19   1  770.42   32.90
   4 -19  -1  737.23   22.60
  -4 -19   1  774.32   30.30
  -4 -19   1  786.92   30.50
  -4 -19   1  770.62   30.30
  -4 -19   1  735.63   31.10
  -4 -19   1  820.22   30.90
   4  19  -1  842.52   27.90
  -3 -19   1   19.90    9.70
  -3 -19   1   12.00    9.90
  -3 -19   1    6.10    9.90
  -3 -19   1   12.00   11.30
   3 -19  -1   10.80    5.40
   3 -19  -1    7.50    5.60
   3 -19  -1   22.00    6.70
  -3 -19   1    4.50    9.30
   3 -19  -1    6.70    6.40
  -3 -19   1   12.80    9.80
  -2 -19   1  174.28   15.80
   2 -19  -1  159.08   11.90
   2 -19  -1  149.39   11.40
  -2 -19   1  182.08   15.60
  -2 -19   1  181.18   16.60
   2 -19  -1  132.99   11.80
   2 -19  -1  158.68   13.40
  -2 -19   1  166.28   17.00
  -2 -19   1  174.48   18.20
   2 -19  -1  150.68   12.50
  -2 -19   1  141.29   15.50
   2 -19  -1  151.68   12.90
  -1 -19   1  120.99   13.30
   1 -19  -1  100.79    9.50
   1 -19  -1  101.89    9.30
   1 -19  -1  108.79    9.80
  -1 -19   1  104.99   10.20
  -1 -19   1  108.49   10.20
  -1 -19   1  108.89   10.20
   1 -19  -1  111.69   10.50
  -1 -19   1  106.19   10.90
  -1 -19   1  109.69   11.50
   1 -19  -1   98.89    9.00
   1 -19  -1   96.49    9.00
   0 -19  -1  484.85   19.10
   0 -19  -1  450.95   19.90
   0 -19  -1  442.96   19.40
   0 -19   1  444.76   18.00
   0 -19   1  453.95   17.70
   0 -19   1  458.25   18.50
   0 -19  -1  457.85   20.50
   0 -19   1  465.95   17.70
   0 -19   1  457.45   20.00
   0 -19  -1  494.05   21.60
   0 -19   1  457.35   19.00
   0 -19  -1  444.46   19.20
   1 -19   1    6.70    6.00
  -1 -19  -1    1.80    8.30
   1 -19   1   -0.10    6.60
   1 -19   1    6.60    6.10
   1 -19   1    5.90    5.70
   1 -19   1    8.60    7.10
  -1 -19  -1    4.40    8.70
   1 -19   1    8.50    6.00
  -1 -19  -1   -3.60    9.30
  -1 -19  -1    9.90    8.40
  -1 -19  -1   -0.70    9.10
  -1 -19  -1   -0.70    8.20
   2 -19   1   13.20    5.30
  -2 -19  -1   33.60   10.50
   2 -19   1   27.00    4.90
   2 -19   1   26.40    5.90
  -2 -19  -1   30.70   10.50
  -2 -19  -1   14.00   10.60
   2 -19   1   26.70    6.10
  -2 -19  -1   13.10    9.40
  -2 -19  -1   33.00    9.90
  -2 -19  -1   35.10    9.80
  -3 -19  -1   48.20   11.70
  -3 -19  -1   40.50   11.80
  -3 -19  -1   46.10   11.40
  -3 -19  -1   45.10   11.20
  -3 -19  -1   42.50   11.40
  -3 -19  -1   39.10   12.70
   3  19   1   49.40    8.10
  -4 -19  -1   49.50   12.80
  -4 -19  -1   34.20   12.00
  -4 -19  -1   45.80   12.60
  -4 -19  -1   56.89   12.60
  -4 -19  -1   53.99   12.40
  -4 -19  -1   25.00   13.60
   4  19   1   33.10    9.30
   4  19   1   45.90   11.30
  -5 -19  -1   19.80   12.60
  -5 -19  -1   53.09   13.10
  -5 -19  -1   48.10   13.30
  -5 -19  -1   56.79   13.20
  -5 -19  -1   37.10   13.70
  -5 -19  -1   30.90   14.70
   5  19   1   47.60   12.50
   5  19   1   45.40   10.80
  -6 -19  -1  263.07   25.50
  -6 -19  -1  172.48   20.70
  -6 -19  -1  189.98   18.60
  -6 -19  -1  204.28   18.00
  -6 -19  -1  218.88   19.70
  -6 -19  -1  196.18   19.50
   6  19   1  215.08   20.40
   6  19   1  201.88   17.50
  -7 -19  -1   -0.30   17.90
  -7 -19  -1  -15.60   14.10
  -7 -19  -1    1.00   15.20
   7 -19   1    3.50    6.40
  -7 -19  -1    4.70   15.20
  -7 -19  -1   12.60   14.80
   7 -19   1    3.60    6.20
  -7 -19  -1   -4.20   14.00
   7  19   1    2.30   14.30
   7  19   1   -3.40   12.80
   8 -19   1   82.29    9.00
  -8 -19  -1  102.39   18.20
  -8 -19  -1  119.99   20.00
  -8 -19  -1   88.09   18.10
  -8 -19  -1  115.19   19.10
   8 -19   1   95.19    9.80
  -8 -19  -1   82.69   18.30
  -8 -19  -1  102.59   21.70
   8  19   1   73.49   18.00
   8  19   1  114.49   18.10
  -8 -20   1  143.59   22.80
   8 -20  -1  150.68   13.80
  -8 -20   1  143.29   20.00
  -8 -20   1  118.29   19.00
   8 -20  -1  130.19   14.70
  -8 -20   1  134.79   18.30
  -8 -20   1  149.79   19.30
  -8 -20   1  153.38   19.80
   8  20  -1  152.18   17.30
   8  20  -1  166.08   18.50
  -7 -20   1   11.20   14.50
   7 -20  -1   10.80    6.90
  -7 -20   1   11.60   14.20
  -7 -20   1   18.20   17.60
  -7 -20   1   14.10   15.00
  -7 -20   1    4.40   14.50
  -7 -20   1  -14.90   14.10
   7  20  -1   -6.90   12.10
   7  20  -1    2.40   13.30
   7  20  -1  -15.50   12.60
  -6 -20   1  325.47   27.00
  -6 -20   1  229.88   24.80
  -6 -20   1  243.78   24.00
  -6 -20   1  258.77   24.40
  -6 -20   1  298.27   29.50
  -6 -20   1  258.67   24.40
   6 -20  -1  235.28   13.10
   6  20  -1  228.38   21.70
   6  20  -1  245.08   20.00
  -5 -20   1   15.90   12.30
  -5 -20   1    4.30   11.80
  -5 -20   1   11.10   12.30
  -5 -20   1   -2.60   14.10
  -5 -20   1    9.30   12.60
   5 -20  -1    9.70    6.10
  -5 -20   1   14.60   12.90
   5  20  -1    6.10   10.70
   4 -20  -1  972.90   28.40
  -4 -20   1  820.32   37.40
  -4 -20   1 1048.10   35.70
  -4 -20   1 1047.10   36.50
  -4 -20   1 1069.69   36.00
  -4 -20   1 1064.09   36.90
  -4 -20   1 1039.50   35.70
   4  20  -1 1040.20   32.60
   3 -20  -1  134.59   12.30
  -3 -20   1  151.08   13.50
  -3 -20   1  140.79   13.20
   3 -20  -1  141.19   11.40
  -3 -20   1  181.08   14.90
   3 -20  -1  135.39   12.10
  -3 -20   1  170.28   14.60
  -3 -20   1  139.49   13.50
  -3 -20   1  151.08   15.00
  -2 -20   1  312.57   20.30
   2 -20  -1  296.87   14.70
   2 -20  -1  281.67   15.60
  -2 -20   1  330.47   18.70
   2 -20  -1  297.17   16.40
  -2 -20   1  322.97   21.10
   2 -20  -1  312.07   15.70
   2 -20  -1  310.67   14.70
  -2 -20   1  305.17   19.40
   2 -20  -1  290.37   14.80
  -2 -20   1  302.47   18.50
  -2 -20   1  324.37   18.30
   1 -20  -1   82.59    9.40
  -1 -20   1   49.90    8.70
  -1 -20   1   70.19   10.20
  -1 -20   1   67.79    9.90
   1 -20  -1   66.59    9.80
  -1 -20   1   51.79   10.50
   1 -20  -1   69.69    9.00
   1 -20  -1   79.89    9.70
   1 -20  -1   68.39    8.70
   1 -20  -1   51.09    8.40
  -1 -20   1   63.89    9.70
  -1 -20   1   53.59    9.30
   0 -20  -1  968.70   31.30
   0 -20   1  982.00   29.40
   0 -20   1 1003.10   29.90
   0 -20   1  958.70   30.30
   0 -20  -1  962.80   30.50
   0 -20   1  970.20   31.20
   0 -20  -1  966.80   30.80
   0 -20   1  950.00   29.60
   0 -20  -1  982.30   32.70
   0 -20   1  970.50   29.30
   0 -20  -1  954.10   30.60
   0 -20  -1  978.10   31.70
  -1 -20  -1  -11.20    8.80
  -1 -20  -1   -1.80    9.90
   1 -20   1    1.20    6.40
  -1 -20  -1    3.10    8.90
   1 -20   1   15.00    7.40
   1 -20   1    8.50    7.50
  -1 -20  -1    2.00   10.10
   1 -20   1   -4.20    6.10
  -1 -20  -1   -4.40    9.00
   1 -20   1    6.80    6.60
  -1 -20  -1   11.30    9.00
   1 -20   1   -3.40    6.40
  -2 -20  -1 1318.67   42.60
   2 -20   1 1284.37   35.10
  -2 -20  -1 1335.27   41.10
  -2 -20  -1 1351.16   40.70
   2 -20   1 1241.98   34.50
   2 -20   1 1243.58   34.90
  -2 -20  -1 1282.97   40.40
  -2 -20  -1 1339.47   41.60
   2 -20   1 1290.27   35.60
  -2 -20  -1 1367.56   40.70
  -3 -20  -1  586.34   26.40
  -3 -20  -1  515.95   26.10
  -3 -20  -1  582.24   29.00
  -3 -20  -1  586.74   26.00
  -3 -20  -1  516.65   26.40
  -3 -20  -1  586.94   26.50
  -4 -20  -1  996.30   39.70
  -4 -20  -1 1235.58   42.10
  -4 -20  -1 1112.79   40.90
  -4 -20  -1 1269.17   41.50
  -4 -20  -1 1229.48   40.90
  -4 -20  -1 1257.07   44.10
   4  20   1 1241.78   36.70
   4  20   1 1277.97   38.80
  -5 -20  -1   40.20   14.00
  -5 -20  -1   37.40   15.70
  -5 -20  -1   39.40   13.60
  -5 -20  -1   20.70   13.00
  -5 -20  -1   30.50   13.50
  -5 -20  -1   36.70   14.00
   5  20   1   45.00   12.70
   5  20   1   39.50   10.70
  -6 -20  -1  519.25   29.90
  -6 -20  -1  486.65   29.50
  -6 -20  -1  500.35   31.40
  -6 -20  -1  470.35   34.00
  -6 -20  -1  525.15   30.80
  -6 -20  -1  525.25   29.90
   6  20   1  464.45   27.40
   6  20   1  510.55   26.00
  -7 -20  -1   32.40   16.40
   7 -20   1   31.80    6.70
  -7 -20  -1   22.90   18.70
   7 -20   1   27.20    6.30
  -7 -20  -1   32.30   16.10
  -7 -20  -1   57.19   16.50
  -7 -20  -1   44.70   15.50
  -7 -20  -1   47.90   16.90
   7  20   1   34.90   13.50
   7  20   1   64.19   15.50
  -8 -20  -1  785.72   45.00
  -8 -20  -1  756.92   38.60
   8 -20   1  723.33   24.90
  -8 -20  -1  837.52   39.60
  -8 -20  -1  733.03   39.20
  -8 -20  -1  758.42   40.20
  -8 -20  -1  754.12   37.90
   8 -20   1  669.23   23.80
   8  20   1  724.03   37.50
  -8 -21   1  151.68   23.90
  -8 -21   1  224.98   22.40
  -8 -21   1  186.38   21.90
  -8 -21   1  177.38   21.90
  -8 -21   1  160.38   20.60
   8 -21  -1  171.98   15.20
  -8 -21   1  198.98   21.80
   8  21  -1  208.58   20.00
  -7 -21   1  222.08   20.90
  -7 -21   1  180.18   19.70
  -7 -21   1  137.09   21.30
  -7 -21   1  159.28   18.60
  -7 -21   1  166.58   19.60
  -7 -21   1  192.08   19.50
   7 -21  -1  144.99   13.00
   7  21  -1  184.88   17.00
   7  21  -1  162.18   17.90
  -6 -21   1  287.27   29.30
  -6 -21   1  309.57   27.30
  -6 -21   1  322.97   25.60
  -6 -21   1  282.47   25.40
  -6 -21   1  284.97   25.80
   6 -21  -1  285.37   14.10
  -6 -21   1  295.87   26.50
   6  21  -1  303.87   23.10
  -5 -21   1  345.37   24.90
  -5 -21   1  367.46   29.20
   5 -21  -1  352.06   14.90
  -5 -21   1  401.86   25.80
  -5 -21   1  394.86   25.70
  -5 -21   1  372.56   26.40
  -5 -21   1  437.76   26.40
   5  21  -1  335.37   21.90
  -4 -21   1  129.29   14.70
  -4 -21   1  121.89   16.70
  -4 -21   1  149.49   15.40
  -4 -21   1  144.69   14.90
   4 -21  -1  119.89   11.20
  -4 -21   1  136.59   14.50
  -4 -21   1  152.28   15.50
   4  21  -1  168.58   16.10
   3 -21  -1   32.30    7.60
  -3 -21   1   36.50   11.10
  -3 -21   1   59.09   13.20
   3 -21  -1   36.70    7.20
  -3 -21   1   56.09   12.50
   3 -21  -1   41.60    7.60
  -3 -21   1   39.50   11.00
  -3 -21   1   55.59   12.20
  -3 -21   1   45.40   11.40
  -2 -21   1  180.88   17.30
   2 -21  -1  179.98   15.00
  -2 -21   1  177.08   19.20
   2 -21  -1  176.78   13.10
  -2 -21   1  192.88   17.30
   2 -21  -1  166.48   13.50
   2 -21  -1  182.68   14.30
  -2 -21   1  185.78   17.70
   2 -21  -1  176.68   14.40
   2 -21  -1  203.98   13.10
  -2 -21   1  170.18   17.10
  -2 -21   1  178.78   15.40
   1 -21  -1  123.29   10.50
  -1 -21   1  130.09   13.00
   1 -21  -1  122.29   11.10
   1 -21  -1  116.99   10.60
   1 -21  -1  116.49   10.10
   1 -21  -1  120.79   11.60
  -1 -21   1  108.99   11.40
  -1 -21   1  122.39   12.10
  -1 -21   1  115.79   11.10
   1 -21  -1  109.59   10.50
  -1 -21   1  134.39   11.30
  -1 -21   1  128.89   11.50
   0 -21   1  181.08   14.30
   0 -21   1  177.88   16.70
   0 -21  -1  168.38   15.20
   0 -21  -1  177.88   15.80
   0 -21  -1  173.68   16.70
   0 -21   1  186.88   14.20
   0 -21  -1  161.58   15.70
   0 -21   1  181.08   14.50
   0 -21  -1  167.08   18.10
   0 -21  -1  189.78   17.00
   0 -21   1  200.58   15.70
   0 -21   1  179.58   14.40
   1 -21   1   35.10    7.70
   1 -21   1   37.30    7.20
   1 -21   1   44.00    7.40
  -1 -21  -1   39.80   11.60
  -1 -21  -1   59.59   10.50
  -1 -21  -1   42.00   10.30
   1 -21   1   38.50    8.00
  -1 -21  -1   32.60   10.60
   1 -21   1   36.50    8.60
  -1 -21  -1   49.99   11.40
   1 -21   1   37.60    7.60
  -1 -21  -1   43.10   10.30
   2 -21   1   35.90    6.70
  -2 -21  -1   37.00   10.90
  -2 -21  -1   32.30   10.60
  -2 -21  -1   23.00   10.50
  -2 -21  -1   32.90   11.50
  -2 -21  -1   21.70   10.70
   2 -21   1   36.60    6.80
   2 -21   1   21.70    6.20
   2 -21   1   31.00    6.80
  -2 -21  -1   33.00   12.40
  -3 -21  -1   67.69   12.90
  -3 -21  -1   44.30   13.90
  -3 -21  -1   47.50   12.50
  -3 -21  -1   69.49   12.60
  -3 -21  -1   80.59   13.50
  -3 -21  -1   51.79   12.30
  -4 -21  -1   41.40   13.40
  -4 -21  -1   52.39   13.10
  -4 -21  -1   59.09   13.50
  -4 -21  -1   45.20   13.30
  -4 -21  -1   71.99   13.20
  -4 -21  -1   66.19   15.40
   4  21   1   50.99    9.80
  -5 -21  -1  -11.60   15.00
  -5 -21  -1    1.50   13.00
  -5 -21  -1    7.80   13.40
  -5 -21  -1    1.40   13.30
  -5 -21  -1    0.80   12.60
  -5 -21  -1   -0.70   12.70
   5  21   1    5.90   10.00
   5  21   1    6.80   11.90
  -6 -21  -1  118.59   18.20
  -6 -21  -1  118.29   16.80
  -6 -21  -1  113.49   17.40
  -6 -21  -1   95.29   19.60
  -6 -21  -1  113.79   16.80
  -6 -21  -1  138.59   18.30
   6  21   1  127.39   14.80
   6  21   1  148.79   16.80
  -7 -21  -1   18.40   16.10
  -7 -21  -1   41.30   16.10
  -7 -21  -1   34.20   15.80
   7 -21   1    3.10    6.20
  -7 -21  -1   38.80   16.20
  -7 -21  -1   19.30   16.00
  -7 -21  -1   19.70   19.00
   7  21   1   36.30   15.90
   7  21   1  -22.70   13.20
  -7 -22   1  128.59   21.30
  -7 -22   1  115.49   18.00
  -7 -22   1  126.99   18.50
   7 -22  -1  138.39   13.00
  -7 -22   1  110.69   18.00
  -7 -22   1  130.79   18.90
  -7 -22   1  140.79   19.10
   7  22  -1  139.59   16.80
  -6 -22   1   28.30   14.70
  -6 -22   1   44.20   14.70
  -6 -22   1   10.10   14.40
   6 -22  -1   38.40    7.50
  -6 -22   1   42.80   17.30
  -6 -22   1   48.10   15.50
  -6 -22   1   30.90   14.90
   6  22  -1   39.40   13.30
  -5 -22   1  448.66   26.90
  -5 -22   1  479.55   31.50
  -5 -22   1  497.25   28.40
  -5 -22   1  439.16   28.20
  -5 -22   1  491.45   27.60
  -5 -22   1  453.85   27.40
   5 -22  -1  450.15   17.20
   5  22  -1  452.85   23.70
  -4 -22   1  237.98   22.10
  -4 -22   1  212.38   22.00
  -4 -22   1  235.18   22.30
  -4 -22   1  212.38   21.40
  -4 -22   1  256.17   22.80
  -4 -22   1  230.18   25.40
   4 -22  -1  229.48   13.40
  -3 -22   1  515.85   27.90
  -3 -22   1  516.05   26.10
   3 -22  -1  540.15   19.60
  -3 -22   1  436.36   24.90
  -3 -22   1  573.54   25.70
   3 -22  -1  542.45   19.40
  -3 -22   1  552.24   25.60
   3 -22  -1  514.15   20.20
   3 -22  -1  526.05   19.50
  -3 -22   1  548.05   25.60
   2 -22  -1  147.79   12.90
   2 -22  -1  164.68   13.90
  -2 -22   1  148.99   14.50
  -2 -22   1  156.88   13.50
   2 -22  -1  140.99   14.30
  -2 -22   1  145.79   15.00
   2 -22  -1  144.99   14.70
  -2 -22   1  142.79   13.40
   2 -22  -1  162.78   15.10
  -2 -22   1  148.79   13.30
  -2 -22   1  155.38   13.40
   2 -22  -1  120.39   12.90
   1 -22  -1 1500.25   42.70
   1 -22  -1 1499.35   43.70
  -1 -22   1 1497.85   43.20
   1 -22  -1 1489.25   41.80
   1 -22  -1 1445.46   42.30
  -1 -22   1 1436.56   43.20
  -1 -22   1 1551.14   44.20
   1 -22  -1 1533.85   42.30
   1 -22  -1 1486.45   42.20
  -1 -22   1 1448.36   42.60
  -1 -22   1 1298.57   44.40
  -1 -22   1 1463.95   43.20
   0 -22   1  336.57   17.80
   0 -22  -1  351.06   19.70
   0 -22  -1  374.76   20.30
   0 -22  -1  356.46   19.60
   0 -22  -1  341.47   21.60
   0 -22   1  376.16   17.70
   0 -22   1  354.76   17.90
   0 -22  -1  356.26   19.70
   0 -22   1  344.57   20.20
   0 -22   1  348.07   18.90
   0 -22  -1  363.26   18.50
   0 -22   1  353.46   18.00
   1 -22   1  738.23   24.60
   1 -22   1  739.53   24.00
  -1 -22  -1  730.53   27.70
   1 -22   1  743.73   24.90
  -1 -22  -1  731.23   28.00
  -1 -22  -1  751.92   28.10
   1 -22   1  733.73   25.50
  -1 -22  -1  733.93   28.70
  -1 -22  -1  782.92   30.60
   1 -22   1  749.62   24.30
   1 -22   1  745.23   23.60
  -1 -22  -1  761.22   29.30
   2 -22   1  118.19   11.60
   2 -22   1  100.89   10.60
  -2 -22  -1  126.09   13.60
  -2 -22  -1  110.89   14.70
   2 -22   1  100.89   11.30
  -2 -22  -1  101.99   12.90
   2 -22   1   98.79   11.30
  -2 -22  -1  109.69   13.10
  -2 -22  -1  108.29   13.60
  -2 -22  -1   82.49   12.50
  -3 -22  -1  816.42   32.10
  -3 -22  -1  852.41   33.10
  -3 -22  -1  830.52   33.00
  -3 -22  -1  696.03   31.80
  -3 -22  -1  875.01   32.60
  -3 -22  -1  865.31   35.20
   3 -22   1  801.02   23.90
  -4 -22  -1   87.09   15.00
  -4 -22  -1   87.49   16.60
  -4 -22  -1   89.49   14.50
  -4 -22  -1   85.59   15.40
  -4 -22  -1   75.49   14.30
  -4 -22  -1   92.39   14.50
  -5 -22  -1  528.15   30.90
  -5 -22  -1  493.45   29.10
  -5 -22  -1  568.24   30.00
  -5 -22  -1  497.45   33.50
  -5 -22  -1  557.04   30.80
  -5 -22  -1  536.95   29.60
   5  22   1  514.95   23.70
   5  22   1  600.54   27.60
  -6 -22  -1   93.69   17.40
  -6 -22  -1   94.49   17.20
  -6 -22  -1  105.29   16.80
  -6 -22  -1   90.79   17.70
  -6 -22  -1   51.49   16.70
  -6 -22  -1   66.69   18.60
   6  22   1   86.39   16.00
   6  22   1   81.39   13.80
  -7 -22  -1  617.94   40.10
  -7 -22  -1  615.54   36.00
  -7 -22  -1  637.84   36.20
  -7 -22  -1  636.04   35.20
  -7 -22  -1  629.44   35.90
  -7 -22  -1  519.95   35.50
   7  22   1  593.94   33.50
   7  22   1  606.04   31.00
  -6 -23   1    6.80   14.40
  -6 -23   1  -13.10   16.20
  -6 -23   1    6.90   13.50
  -6 -23   1    5.60   14.70
  -6 -23   1    6.70   14.50
   6 -23  -1   -5.70    7.00
  -6 -23   1    0.60   14.50
   6  23  -1   10.10   13.10
  -5 -23   1  296.07   25.40
  -5 -23   1  287.07   25.40
  -5 -23   1  300.67   25.70
  -5 -23   1  287.67   29.00
  -5 -23   1  335.87   25.60
  -5 -23   1  293.97   26.60
   5 -23  -1  273.67   14.70
   5  23  -1  310.97   20.80
   4 -23  -1    5.80    7.00
  -4 -23   1   -1.80   12.50
  -4 -23   1  -10.60   12.10
  -4 -23   1    3.00   13.60
  -4 -23   1   -8.60   11.50
  -4 -23   1   -1.70   12.80
  -4 -23   1   10.00   12.00
  -3 -23   1  256.07   21.60
  -3 -23   1  261.27   21.50
  -3 -23   1  249.18   22.00
  -3 -23   1  265.37   21.60
  -3 -23   1  283.27   24.10
  -3 -23   1  287.37   21.30
   3 -23  -1  251.27   15.00
   3 -23  -1  285.47   15.30
   3 -23  -1  279.47   16.10
   3 -23  -1  270.37   14.70
  -2 -23   1    6.70   10.30
   2 -23  -1    1.50    7.50
  -2 -23   1    8.60   10.20
   2 -23  -1  -12.90    8.20
   2 -23  -1   10.10    8.40
  -2 -23   1    3.80   11.30
   2 -23  -1   -1.00    8.20
   2 -23  -1   -0.70    7.00
  -2 -23   1    5.90    9.80
  -2 -23   1   -0.20   10.10
   2 -23  -1    0.40    8.20
  -2 -23   1   16.70   12.10
   1 -23  -1   76.19    9.90
  -1 -23   1  109.19   12.00
  -1 -23   1  105.49   13.40
  -1 -23   1  126.99   12.70
  -1 -23   1  107.49   11.20
  -1 -23   1  114.69   12.10
   1 -23  -1  101.19   11.20
   1 -23  -1  104.79   11.10
   1 -23  -1  108.69   11.10
  -1 -23   1  122.19   12.20
   1 -23  -1  120.59   11.50
   1 -23  -1  110.59   12.10
   0 -23  -1  125.19   13.70
   0 -23   1  133.29   11.00
   0 -23   1  136.09   11.50
   0 -23  -1  140.99   13.20
   0 -23  -1  114.79   12.50
   0 -23  -1  127.59   11.60
   0 -23   1  140.49   12.80
   0 -23   1  136.89   11.90
   0 -23  -1  139.29   12.60
   0 -23   1  133.29   11.60
   0 -23   1  134.29   15.10
   0 -23  -1  120.79   12.10
  -1 -23  -1  455.25   23.50
   1 -23   1  493.15   19.30
  -1 -23  -1  473.15   26.00
   1 -23   1  501.15   20.00
  -1 -23  -1  486.05   23.90
   1 -23   1  441.56   19.40
   1 -23   1  491.65   18.20
   1 -23   1  483.35   18.80
  -1 -23  -1  465.65   24.40
  -1 -23  -1  493.65   23.70
  -1 -23  -1  444.66   22.30
   1 -23   1  502.55   20.80
  -2 -23  -1   27.10   11.70
  -2 -23  -1    4.50   12.40
   2 -23   1   26.80    7.20
  -2 -23  -1   15.80   10.90
   2 -23   1   10.60    7.00
   2 -23   1   15.70    7.30
  -2 -23  -1   10.40   11.70
   2 -23   1   23.40    6.90
  -2 -23  -1    9.50   11.20
  -2 -23  -1   24.90   11.30
  -3 -23  -1    8.00   11.70
  -3 -23  -1    5.40   11.60
  -3 -23  -1    3.30   11.70
  -3 -23  -1    0.00   13.50
  -3 -23  -1    9.50   11.10
   3 -23   1    7.00    5.90
   3 -23   1   11.30    6.00
  -3 -23  -1   15.30   12.10
  -4 -23  -1   90.79   16.80
  -4 -23  -1   81.59   14.70
  -4 -23  -1   48.10   14.30
  -4 -23  -1   46.90   14.60
  -4 -23  -1   72.89   14.40
  -4 -23  -1   68.09   13.90
  -5 -23  -1   11.40   13.70
  -5 -23  -1   -6.70   13.40
  -5 -23  -1    6.50   16.30
  -5 -23  -1    4.00   13.30
  -5 -23  -1   12.10   14.30
  -5 -23  -1   -0.20   13.60
   5  23   1    9.10   12.30
  -6 -23  -1  -14.50   15.50
  -6 -23  -1   19.80   15.80
  -6 -23  -1    0.20   15.90
  -6 -23  -1  -14.20   16.80
  -6 -23  -1   -0.70   14.40
  -6 -23  -1   -2.50   14.90
   6  23   1  -11.20   14.40
   6  23   1   21.50   12.70
  -6 -24   1   62.59   16.70
  -6 -24   1   43.80   18.50
  -6 -24   1   50.09   16.10
  -6 -24   1   41.40   16.10
  -6 -24   1   45.80   16.30
   6 -24  -1   35.20    8.00
  -6 -24   1   37.60   15.10
   6  24  -1   23.90   13.70
  -5 -24   1  464.85   28.40
  -5 -24   1  465.25   29.00
  -5 -24   1  446.26   28.90
   5 -24  -1  417.26   17.90
  -5 -24   1  443.66   27.90
  -5 -24   1  443.26   32.20
  -5 -24   1  464.25   28.70
  -4 -24   1  141.39   16.30
  -4 -24   1  166.78   16.80
  -4 -24   1  142.99   18.30
  -4 -24   1  171.38   17.40
   4 -24  -1  153.78   13.70
  -4 -24   1  170.18   17.20
  -4 -24   1  154.78   16.40
  -3 -24   1  612.34   27.60
  -3 -24   1  562.34   30.60
  -3 -24   1  597.54   28.00
  -3 -24   1  652.93   29.20
  -3 -24   1  580.84   27.90
   3 -24  -1  599.74   21.00
   3 -24  -1  563.64   22.20
   3 -24  -1  572.04   21.40
  -3 -24   1  588.24   28.10
   3 -24  -1  570.94   21.90
   2 -24  -1   50.39    9.60
  -2 -24   1   45.80   11.80
   2 -24  -1   38.60    9.30
   2 -24  -1   43.70    9.60
   2 -24  -1   41.10    8.00
  -2 -24   1   49.30   13.10
   2 -24  -1   44.90    8.40
  -2 -24   1   36.60   11.90
  -2 -24   1   49.99   11.10
   2 -24  -1   48.20    9.70
  -2 -24   1   38.90   11.70
  -2 -24   1   30.90   11.90
  -1 -24   1  504.95   22.40
  -1 -24   1  525.55   24.00
   1 -24  -1  540.25   24.70
   1 -24  -1  556.34   23.40
  -1 -24   1  566.14   24.40
  -1 -24   1  543.75   24.80
   1 -24  -1  570.04   22.00
   1 -24  -1  560.84   22.90
  -1 -24   1  531.35   26.40
   1 -24  -1  531.65   23.10
   1 -24  -1  529.05   22.40
  -1 -24   1  534.35   24.10
   0 -24   1  356.16   19.40
   0 -24  -1  344.37   22.70
   0 -24   1  374.06   19.10
   0 -24  -1  351.96   21.40
   0 -24  -1  358.46   19.40
   0 -24   1  353.76   19.30
   0 -24   1  367.06   21.30
   0 -24  -1  387.46   21.10
   0 -24   1  394.56   20.40
   0 -24  -1  377.96   21.00
   0 -24  -1  368.26   20.80
   1 -24   1  904.31   30.30
   1 -24   1  924.21   28.60
   1 -24   1  909.21   29.60
   1 -24   1  916.41   29.40
   1 -24   1  941.91   29.80
  -1 -24  -1  953.30   35.50
  -1 -24  -1  894.41   33.10
  -1 -24  -1  945.61   33.90
  -1 -24  -1  922.41   33.10
  -1 -24  -1  941.81   33.50
   1 -24   1  943.91   28.10
  -1 -24  -1  953.90   32.30
  -2 -24  -1  114.49   16.10
   2 -24   1  123.29   12.30
   2 -24   1  119.29   12.80
   2 -24   1  139.69   13.20
  -2 -24  -1  126.09   14.90
  -2 -24  -1  152.88   15.40
  -2 -24  -1  126.49   14.00
  -2 -24  -1  151.08   15.30
  -2 -24  -1   91.29   15.00
   3 -24   1  420.76   16.60
  -3 -24  -1  454.75   26.10
  -3 -24  -1  460.25   26.40
  -3 -24  -1  477.65   27.10
   3 -24   1  439.26   17.20
  -3 -24  -1  459.65   26.30
  -3 -24  -1  450.15   28.80
  -3 -24  -1  454.25   26.30
  -4 -24  -1   76.29   15.30
  -4 -24  -1  111.49   16.10
  -4 -24  -1   66.69   14.90
  -4 -24  -1   70.99   15.10
  -4 -24  -1   89.29   15.90
  -4 -24  -1   72.59   17.60
  -5 -24  -1  474.95   29.90
  -5 -24  -1  511.85   31.50
  -5 -24  -1  557.04   31.90
  -5 -24  -1  550.54   35.70
  -5 -24  -1  488.45   31.40
  -5 -24  -1  495.75   29.70
  -5 -25   1  162.78   18.50
  -5 -25   1  190.88   18.90
  -5 -25   1  201.78   18.50
   5 -25  -1  139.29   14.00
  -5 -25   1  205.58   20.30
  -5 -25   1  171.28   21.30
  -5 -25   1  153.38   18.20
  -4 -25   1  188.98   18.00
  -4 -25   1  207.78   20.20
   4 -25  -1  181.58   15.30
  -4 -25   1  239.28   23.40
  -4 -25   1  192.98   18.10
  -4 -25   1  210.38   17.60
   4 -25  -1  177.88   14.90
  -4 -25   1  167.88   17.30
   3 -25  -1  157.48   15.50
  -3 -25   1  220.18   22.20
   3 -25  -1  143.49   15.10
   3 -25  -1  153.78   14.20
  -3 -25   1  188.98   20.60
  -3 -25   1  196.68   21.90
   3 -25  -1  148.59   14.00
  -3 -25   1  160.28   18.20
  -3 -25   1  172.88   16.30
  -3 -25   1  175.88   16.90
  -2 -25   1  290.27   24.90
  -2 -25   1  294.97   22.50
  -2 -25   1  285.67   22.30
  -2 -25   1  297.97   21.90
   2 -25  -1  266.17   18.10
   2 -25  -1  290.97   17.90
   2 -25  -1  251.67   17.60
  -2 -25   1  308.97   20.30
   2 -25  -1  282.07   16.30
   2 -25  -1  258.07   15.30
   2 -25  -1  299.87   18.60
  -2 -25   1  299.87   21.80
   1 -25  -1   40.60   10.40
   1 -25  -1   21.20   10.40
   1 -25  -1   37.30    9.90
  -1 -25   1   28.60   10.70
   1 -25  -1   22.00   10.50
   1 -25  -1   32.70    9.80
   1 -25  -1   20.30    9.50
  -1 -25   1   33.20    9.80
  -1 -25   1   26.80   10.60
  -1 -25   1   37.10   11.40
  -1 -25   1   38.10   12.20
   0 -25  -1  148.19   16.40
   0 -25   1  146.99   13.80
   0 -25  -1  147.89   13.80
   0 -25   1  175.08   16.20
   0 -25   1  161.28   17.50
   0 -25  -1  155.58   14.40
   0 -25  -1  157.98   15.30
   0 -25   1  157.48   12.60
   0 -25   1  155.28   13.20
   0 -25   1  149.79   16.80
   0 -25  -1  181.98   18.10
   1 -25   1   15.60    8.80
   1 -25   1   -1.90    8.90
   1 -25   1   19.80    8.60
   1 -25   1    0.70    8.80
   1 -25   1   -8.60    7.80
  -1 -25  -1   12.40   11.30
  -1 -25  -1    9.00   11.50
  -1 -25  -1    9.50   10.90
  -1 -25  -1   -6.80   11.90
   1 -25   1   10.60    7.40
  -1 -25  -1    5.40   10.00
  -1 -25  -1   16.00   12.10
  -2 -25  -1    9.90   13.40
  -2 -25  -1   11.40   11.80
  -2 -25  -1    0.10   12.00
   2 -25   1   20.10    8.30
  -2 -25  -1   35.40   12.90
  -2 -25  -1   18.60   13.40
   2 -25   1   27.80    8.20
  -2 -25  -1   14.00   12.20
   2 -25   1   17.50    7.70
  -3 -25  -1   35.40   13.90
  -3 -25  -1    3.60   13.40
  -3 -25  -1    9.50   13.10
   3 -25   1   33.90    7.50
  -3 -25  -1   41.50   13.70
  -3 -25  -1   27.40   15.20
   3 -25   1   23.90    7.50
  -3 -25  -1   39.20   13.70
  -4 -25  -1  -10.80   12.90
  -4 -25  -1   15.00   14.00
  -4 -25  -1    9.90   14.20
   4 -25   1    3.80    6.20
  -4 -25  -1    1.10   13.40
  -4 -25  -1   10.60   16.10
  -4 -25  -1  -16.20   13.80
   4 -25   1   -2.70    6.10
  -4 -26   1  395.06   27.70
   4 -26  -1  386.66   20.00
  -4 -26   1  434.16   29.40
   4 -26  -1  439.96   19.60
  -4 -26   1  418.46   30.50
  -4 -26   1  445.26   27.50
  -4 -26   1  441.46   28.30
  -4 -26   1  442.16   27.70
  -3 -26   1   47.00   12.90
   3 -26  -1   54.29    9.90
  -3 -26   1   60.59   15.80
  -3 -26   1   39.90   13.60
   3 -26  -1   41.50   10.00
  -3 -26   1   69.09   15.50
  -3 -26   1   42.60   13.70
   3 -26  -1   59.39    8.80
  -3 -26   1   44.40   13.70
   3 -26  -1   34.60    8.60
   2 -26  -1  323.87   17.30
  -2 -26   1  318.17   25.50
  -2 -26   1  368.06   24.30
   2 -26  -1  331.57   19.10
   2 -26  -1  349.77   19.70
  -2 -26   1  367.96   23.30
   2 -26  -1  342.37   16.10
  -2 -26   1  363.16   24.20
  -2 -26   1  346.17   23.70
   2 -26  -1  331.67   19.40
   2 -26  -1  323.37   20.00
  -2 -26   1  342.67   21.70
  -1 -26   1  263.47   18.20
   1 -26  -1  235.48   19.20
  -1 -26   1  214.68   19.90
   1 -26  -1  279.77   19.70
  -1 -26   1  245.68   21.00
  -1 -26   1  262.27   22.70
   1 -26  -1  246.98   19.80
  -1 -26   1  252.07   21.30
   1 -26  -1  265.37   17.80
  -1 -26   1  288.17   21.00
   1 -26  -1  270.27   20.40
   1 -26  -1  254.37   18.70
   0 -26   1  595.74   26.60
   0 -26   1  618.04   25.80
   0 -26  -1  607.04   26.20
   0 -26  -1  621.04   27.30
   0 -26  -1  633.44   27.20
   0 -26   1  630.34   25.60
   0 -26  -1  620.94   27.10
   0 -26   1  644.94   24.60
   0 -26  -1  592.14   24.80
   0 -26   1  586.04   25.40
   0 -26   1  593.44   24.50
   0 -26  -1  628.64   28.90
  -1 -26  -1   78.69   11.90
  -1 -26  -1  100.29   13.90
   1 -26   1   55.49    9.30
  -1 -26  -1   58.49   12.70
  -1 -26  -1   70.79   14.40
   1 -26   1   75.39   10.40
   1 -26   1   70.99   10.90
   1 -26   1   75.09    8.80
   1 -26   1   72.59   10.40
  -1 -26  -1   70.29   13.10
  -1 -26  -1   60.39   13.30
   1 -26   1   60.79   10.40
  -2 -26  -1  397.76   26.20
  -2 -26  -1  416.16   24.10
   2 -26   1  354.36   18.50
  -2 -26  -1  421.56   27.30
  -2 -26  -1  383.26   25.90
   2 -26   1  379.76   18.40
  -2 -26  -1  429.26   28.70
  -2 -26  -1  421.66   26.20
  -3 -26  -1    3.50   13.20
   3 -26   1   22.60    7.80
  -3 -26  -1   27.70   14.10
  -3 -26  -1    8.80   13.80
  -3 -26  -1   23.30   15.30
  -3 -26  -1   17.00   13.90
  -3 -26  -1   36.30   14.50
   3 -26   1   19.30    7.90
   2 -27  -1  282.97   19.00
   2 -27  -1  245.78   19.60
   2 -27  -1  267.17   18.80
   2 -27  -1  289.17   15.70
  -2 -27   1  302.67   21.10
   2 -27  -1  252.77   18.70
  -2 -27   1  265.67   23.20
  -2 -27   1  302.77   25.80
   2 -27  -1  259.37   16.70
  -2 -27   1  289.77   23.60
  -2 -27   1  282.47   24.00
  -2 -27   1  328.57   24.30
   1 -27  -1   24.80   10.80
  -1 -27   1   19.20   12.00
  -1 -27   1   -1.60    9.20
   1 -27  -1   13.80   11.10
  -1 -27   1   16.90   11.30
  -1 -27   1    7.40   12.00
   1 -27  -1    5.50    9.70
  -1 -27   1   -2.20   11.50
   1 -27  -1   10.90    9.80
   1 -27  -1    1.20   11.00
  -1 -27   1   -4.20   11.40
   1 -27  -1   20.20   11.60
   0 -27  -1  181.38   20.60
   0 -27   1  179.78   15.10
   0 -27  -1  179.98   16.00
   0 -27   1  203.88   19.00
   0 -27  -1  180.18   17.80
   0 -27  -1  179.68   19.70
   0 -27   1  188.38   17.70
   0 -27  -1  143.29   15.60
   0 -27   1  188.08   19.70
   0 -27   1  174.18   17.90
   0 -27  -1  163.28   15.20
   0 -27   1  208.88   19.50
  -1 -27  -1   -9.90   12.00
   1 -27   1   -5.40    8.20
   1 -27   1   -3.50    9.10
  -1 -27  -1   -5.20   12.50
  -1 -27  -1    8.70   12.90
  -1 -27  -1   16.10   12.60
  -1 -27  -1    8.10   13.30
   1 -27   1  -10.20    9.60
   1 -27   1   -1.90    7.70
  -1 -27  -1   -4.50   10.50
   1 -27   1    9.60    9.80
   1 -27   1    1.20    9.10
  -2 -27  -1    8.10   14.50
  -2 -27  -1  -15.00   12.20
  -2 -27  -1    5.40   13.40
   2 -27   1    5.40    7.80
   2 -27   1   -2.40    8.30
  -2 -27  -1    3.30   13.90
   2 -27   1   25.90    9.20
  -2 -27  -1   11.50   13.10
  -2 -27  -1   -5.50   11.10
  12   0  -2   49.30   16.20
  12   0  -2   28.30   18.30
  12   0  -2   51.79   16.00
 -12   0   2   26.20   15.10
 -12   0   2   44.70   15.40
 -12   0   2   33.60   14.80
 -12   0   2   34.10   17.60
 -12   0   2    8.80   13.50
  12   0  -2   41.60   16.70
 -12   0   2   53.79   14.30
 -11   0   2   15.80   12.50
  11   0  -2   -9.70   14.80
 -11   0   2   -4.90   16.00
 -11   0   2  -13.20   12.50
  11   0  -2   -4.30   12.80
  11   0  -2  -23.10   13.60
 -11   0   2   -4.20   11.70
  11   0  -2    1.40   13.40
 -11   0   2   -3.20   14.40
 -10   0   2  532.05   31.40
  10   0  -2  501.15   26.90
 -10   0   2  544.95   25.70
  10   0  -2  519.45   30.20
 -10   0   2  552.74   24.10
  10   0  -2  430.26   27.60
 -10   0   2  528.85   27.10
  10   0  -2  521.95   26.50
 -10   0   2  501.35   28.90
  -9   0   2    0.30   13.00
   9   0  -2   -8.50   11.60
   9   0  -2   15.20   10.80
  -9   0   2   14.20   10.10
  -9   0   2    5.00   10.80
  -9   0   2    7.30    9.30
   9   0  -2    8.30   11.20
   9   0  -2    5.00   10.20
  -9   0   2    6.30    9.90
   8   0  -2  137.09   15.00
  -8   0   2  118.79   11.00
  -8   0   2  148.89   15.40
  -8   0   2  129.89   13.50
  -8   0   2  122.09   11.20
   8   0  -2  133.19   12.40
   8   0  -2  132.89   12.10
   8   0  -2  132.89   13.30
  -7   0   2   -5.40    6.90
  -7   0   2    0.10    7.50
   7   0  -2   -8.60    6.80
  -7   0   2   -2.50    7.30
   7   0  -2    0.80    7.70
   7   0  -2   -1.60    7.50
   7   0  -2    2.90    8.30
  -7   0   2   -7.30    6.70
  -6   0   2  404.56   17.90
   6   0  -2  422.96   18.40
   6   0  -2  394.86   18.20
  -6   0   2  387.36   18.40
  -6   0   2  409.16   17.20
   6   0  -2  409.36   19.00
  -6   0   2  402.76   17.80
   6   0  -2  416.26   19.80
  -5   0   2   -5.10    6.90
  -5   0   2   -0.80    7.50
  -5   0   2    9.80    7.30
  -5   0   2    3.60    7.50
   5   0  -2   -2.20    7.20
   5   0  -2    3.10    7.30
   5   0  -2    5.60    7.30
   5   0  -2   -5.30    7.80
   4   0  -2  312.07   12.40
  -4   0   2  312.67   12.90
  -4   0   2  317.87   12.10
   4   0  -2  323.47   13.30
  -4   0   2  317.07   12.70
   4   0  -2  321.07   12.70
   4   0  -2  318.97   12.90
  -4   0   2  325.27   12.60
  -3   0   2   14.50    4.10
   3   0  -2   21.30    4.20
  -3   0   2   15.70    4.00
  -3   0   2   16.70    3.70
   3   0  -2   12.10    3.80
   3   0  -2   21.90    4.20
  -2   0   2 1084.49   29.20
   2   0  -2 1094.59   29.00
  -2   0   2 1097.29   29.10
  -2   0   2 1127.49   29.40
  -2   0   2 1111.59   29.00
   2   0  -2 1124.99   29.40
   2   0  -2 1082.79   29.30
   2   0  -2 1103.59   29.10
   1   0  -2    0.70    2.30
  -1   0   2    3.00    2.60
  -1   0   2    3.20    2.50
  -1   0   2   -0.10    2.20
   1   0  -2    1.30    2.30
   1   0  -2   -0.40    2.30
   0   0   2 1802.72   44.30
   0   0  -2 1810.12   44.40
   0   0   2 1774.22   45.20
   0   0   2 1867.01   44.10
   0   0  -2 1553.74   43.90
   1   0   2    4.20    3.60
   1   0   2    2.50    3.80
  -1   0  -2    7.10    3.70
  -1   0  -2    6.90    3.60
  -1   0  -2    9.50    3.70
  -1   0  -2    4.80    3.90
   1   0   2    6.60    4.00
   1   0   2    5.10    3.40
   2   0   2 3092.69   77.49
  -2   0  -2 3117.19   77.89
  -2   0  -2 3117.59   77.19
  -2   0  -2 3126.79   77.99
  -2   0  -2 3023.50   77.69
  -2   0  -2 3111.69   77.29
  -2   0  -2 3128.59   77.69
   2   0   2 3114.59   77.39
   2   0   2 3054.89   77.59
   2   0   2 3082.99   78.09
   3   0   2   10.10    4.40
   3   0   2    4.30    4.00
  -3   0  -2    6.50    4.50
  -3   0  -2   10.30    4.80
  -3   0  -2    5.20    4.10
   3   0   2    2.30    4.30
  -3   0  -2    3.90    4.90
   3   0   2   10.60    4.90
  -3   0  -2    7.70    3.90
  -3   0  -2    6.20    4.50
   3   0   2    8.60    4.90
   4   0   2 1862.71   50.79
   4   0   2 1846.02   50.39
   4   0   2 1900.51   49.50
  -4   0  -2 1850.91   50.09
  -4   0  -2 1870.81   49.99
  -4   0  -2 1844.52   48.70
  -4   0  -2 1847.12   50.89
  -4   0  -2 1883.91   49.90
   4   0   2 1855.21   49.50
   4   0   2 1813.62   50.49
   4   0   2 1847.92   49.99
  -4   0  -2 1872.61   49.10
   5   0   2   -1.10    8.70
  -5   0  -2    2.00    7.70
  -5   0  -2   -7.80    8.50
   5   0   2   -3.60    9.10
  -5   0  -2   11.20    8.30
  -5   0  -2   12.20    9.50
  -5   0  -2    0.70    7.10
  -5   0  -2    3.30    7.60
   5   0   2   -6.70    7.50
   5   0   2    2.20    8.20
  -6   0  -2 1603.84   45.90
  -6   0  -2 1643.34   46.50
  -6   0  -2 1680.93   45.20
  -6   0  -2 1626.44   46.20
  -6   0  -2 1625.94   44.60
   6   0   2 1646.74   45.70
  -6   0  -2 1596.64   47.50
   6   0   2 1616.24   47.10
   6   0   2 1627.14   47.40
   6   0   2 1655.63   46.00
  -7   0  -2   -2.40    7.70
  -7   0  -2    1.00    7.00
  -7   0  -2   -4.00    7.60
  -7   0  -2   -5.70    7.90
  -7   0  -2    0.30    8.70
   7   0   2   -1.50    9.70
   7   0   2   10.50    9.40
  -7   0  -2   -8.40    9.70
   7   0   2   -1.90    8.10
   7   0   2    0.50    7.70
  -8   0  -2 1991.60   54.39
   8   0   2 1973.90   56.79
   8   0   2 1967.60   58.29
  -8   0  -2 1953.00   56.59
  -8   0  -2 1984.90   55.29
  -8   0  -2 2003.70   57.79
  -8   0  -2 1971.60   56.29
  -8   0  -2 1930.21   58.69
   8   0   2 2002.40   59.09
   8   0   2 2021.20   56.59
  -9   0  -2   -9.90   10.90
  -9   0  -2   -4.80    9.50
  -9   0  -2   16.40   10.80
  -9   0  -2  -14.70   12.60
   9   0   2   -4.70   11.20
  -9   0  -2   -6.10   10.80
   9   0   2    3.20   12.90
   9   0   2  -21.20   11.80
  -9   0  -2    6.70   13.50
   9   0   2   -3.80   13.30
 -10   0  -2  321.07   28.60
  10   0   2  358.56   25.40
 -10   0  -2  328.57   27.20
 -10   0  -2  357.16   20.90
  10   0   2  345.37   29.10
 -10   0  -2  340.27   22.90
  10   0   2  411.26   26.90
  11   0   2  -12.50   15.30
 -11   0  -2    3.50   13.40
  11   0   2   28.60   18.20
  11   0   2    3.10   13.60
 -11   0  -2  -14.20   15.90
 -11   0  -2    3.20   12.20
 -11   0  -2    1.00   11.50
 -11   0  -2   11.10   14.40
 -11   0  -2   -9.40   13.80
 -12  -1   2  608.04   32.50
  12  -1  -2  609.84   34.10
  12  -1  -2  584.44   38.30
  12  -1  -2  627.94   32.80
  12  -1  -2  632.84   36.40
 -12  -1   2  647.94   32.10
 -12  -1   2  641.74   37.10
 -12  -1   2  630.34   30.60
 -12  -1   2  679.43   34.40
 -12   1   2  661.93   29.20
  12   1  -2  652.23   36.80
  12   1  -2  645.84   34.50
 -12   1   2  597.84   35.50
 -12   1   2  625.44   32.50
 -12   1   2  652.83   32.40
  12   1  -2  639.44   33.50
 -12   1   2  631.04   30.10
  12   1  -2  656.23   39.50
 -11  -1   2   79.39   13.60
 -11  -1   2   84.29   16.60
 -11  -1   2   90.39   19.00
  11  -1  -2   80.59   15.30
 -11  -1   2   51.69   14.80
 -11  -1   2   71.89   14.40
  11  -1  -2   61.09   16.40
  11  -1  -2   71.89   14.70
  11  -1  -2   65.49   15.40
  11   1  -2   70.29   15.10
  11   1  -2   66.19   15.80
 -11   1   2   54.09   17.20
 -11   1   2   64.59   14.40
 -11   1   2   74.99   13.50
 -11   1   2   73.89   16.40
 -11   1   2   91.39   12.70
  11   1  -2   72.29   17.40
  11   1  -2   63.89   15.50
  10  -1  -2 1681.93   50.09
 -10  -1   2 1610.14   50.79
 -10  -1   2 1560.44   51.59
  10  -1  -2 1610.54   49.90
 -10  -1   2 1620.04   48.20
  10  -1  -2 1625.24   52.19
 -10  -1   2 1622.74   49.30
 -10  -1   2 1538.15   53.89
 -10   1   2 1556.54   48.60
 -10   1   2 1572.24   53.29
  10   1  -2 1593.24   50.29
 -10   1   2 1607.74   49.90
 -10   1   2 1657.93   47.90
  10   1  -2 1632.04   53.39
 -10   1   2 1618.04   47.30
  10   1  -2 1640.74   50.79
 -10   1   2 1568.84   51.19
   9  -1  -2  768.92   29.60
   9  -1  -2  752.92   29.70
  -9  -1   2  772.12   33.80
  -9  -1   2  809.82   31.00
   9  -1  -2  762.02   32.40
  -9  -1   2  781.22   28.30
  -9  -1   2  789.72   29.40
  -9  -1   2  779.52   29.90
   9  -1  -2  760.42   30.80
  -9   1   2  720.53   33.10
   9   1  -2  789.02   32.00
  -9   1   2  757.22   28.40
   9   1  -2  787.82   30.20
  -9   1   2  768.32   27.70
   9   1  -2  830.22   30.50
  -9   1   2  776.02   29.40
   9   1  -2  824.62   33.20
  -9   1   2  744.53   29.80
  -8  -1   2  702.63   25.60
   8  -1  -2  679.93   25.40
   8  -1  -2  679.93   25.80
  -8  -1   2  713.23   26.20
  -8  -1   2  698.53   24.70
   8  -1  -2  623.04   27.10
  -8  -1   2  679.23   25.30
   8  -1  -2  674.93   26.50
   8   1  -2  696.13   25.80
  -8   1   2  676.23   23.80
  -8   1   2  657.73   24.90
   8   1  -2  693.43   27.20
  -8   1   2  681.63   25.60
  -8   1   2  658.03   24.40
   8   1  -2  680.33   27.90
   8   1  -2  682.53   26.10
   7  -1  -2  284.47   15.70
   7  -1  -2  277.37   17.50
  -7  -1   2  281.97   15.10
   7  -1  -2  265.07   16.70
  -7  -1   2  298.17   16.10
  -7  -1   2  257.77   15.90
  -7  -1   2  238.28   16.20
   7  -1  -2  263.77   15.90
   7   1  -2  253.27   15.80
   7   1  -2  310.17   17.50
  -7   1   2  276.27   14.30
   7   1  -2  303.67   16.50
   7   1  -2  278.47   18.30
  -7   1   2  263.97   15.90
  -7   1   2  232.88   15.20
  -7   1   2  277.97   15.00
   6  -1  -2 2671.23   70.69
   6  -1  -2 2753.82   71.59
  -6  -1   2 2650.14   70.79
  -6  -1   2 2697.13   71.19
  -6  -1   2 2718.33   70.89
  -6  -1   2 2723.83   70.29
   6  -1  -2 2671.73   70.89
   6  -1  -2 2698.13   70.49
   6   1  -2 2718.73   71.49
   6   1  -2 2676.63   70.99
   6   1  -2 2698.43   70.89
  -6   1   2 2705.63   70.89
  -6   1   2 2664.73   70.39
  -6   1   2 2722.73   69.89
   6   1  -2 2614.84   71.79
  -6   1   2 2727.63   70.09
  -5  -1   2   47.50    8.30
  -5  -1   2   72.59    9.10
   5  -1  -2   60.79    8.30
   5  -1  -2   53.19    8.10
   5  -1  -2   52.09    8.00
  -5  -1   2   57.39    8.40
   5  -1  -2   63.09    8.90
  -5  -1   2   54.39    8.70
   5   1  -2   62.19    8.90
   5   1  -2   57.29    9.00
  -5   1   2   42.50    8.10
  -5   1   2   53.19    7.70
   5   1  -2   56.59    8.70
   5   1  -2   59.99    8.50
  -5   1   2   63.69    8.20
  -5   1   2   67.09    7.90
   4  -1  -2  369.06   13.30
   4  -1  -2  351.06   13.90
  -4  -1   2  387.86   13.60
  -4  -1   2  376.16   13.80
  -4  -1   2  379.16   14.20
   4  -1  -2  366.56   13.70
  -4  -1   2  374.16   14.10
   4  -1  -2  349.77   13.40
   4   1  -2  353.96   13.50
   4   1  -2  357.16   14.50
  -4   1   2  366.76   12.90
   4   1  -2  364.36   13.90
  -4   1   2  367.46   13.30
  -4   1   2  366.26   13.70
  -4   1   2  373.66   13.30
   4   1  -2  364.26   14.00
   3  -1  -2 1667.73   43.60
  -3  -1   2 1725.73   43.50
   3  -1  -2 1649.83   43.40
   3  -1  -2 1683.63   43.20
  -3  -1   2 1719.53   43.90
  -3  -1   2 1645.54   43.60
  -3  -1   2 1673.13   43.70
   3  -1  -2 1625.24   43.30
   3   1  -2 1729.13   43.50
  -3   1   2 1710.63   43.10
   3   1  -2 1711.53   43.90
   3   1  -2 1669.23   43.70
   3   1  -2 1661.13   43.70
  -3   1   2 1706.23   43.40
  -3   1   2 1679.53   43.30
  -3   1   2 1640.94   43.50
  -2  -1   2  550.64   16.10
   2  -1  -2  538.85   16.10
  -2  -1   2  554.04   16.50
   2  -1  -2  551.44   15.90
   2  -1  -2  547.55   15.90
  -2  -1   2  542.75   16.10
  -2  -1   2  533.55   16.30
   2  -1  -2  556.24   16.30
  -2   1   2  565.34   16.20
   2   1  -2  547.95   16.00
  -2   1   2  545.05   16.00
   2   1  -2  528.95   16.50
   2   1  -2  547.85   16.40
  -2   1   2  553.44   15.80
   2   1  -2  520.65   16.10
  -2   1   2  546.35   16.00
  -1  -1   2  868.71   22.40
   1  -1  -2  833.82   22.50
  -1  -1   2  869.11   22.60
   1  -1  -2  832.12   22.60
   1  -1  -2  851.61   22.40
  -1   1   2  843.12   22.50
   1   1  -2  867.71   22.30
  -1   1   2  849.32   22.70
   1   1  -2  857.41   22.40
   1   1  -2  881.71   22.60
  -1   1   2  854.61   22.40
   0  -1   2 2989.10   72.29
   0  -1  -2 3048.09   72.29
   0  -1   2 3033.80   71.99
   0  -1   2 3048.69   72.29
   0   1   2 3044.90   72.59
   0   1  -2 2552.34   71.89
   0   1  -2 2646.14   71.79
   0   1  -2 2990.60   72.19
   0   1   2 2905.91   72.29
   1  -1   2  614.74   16.90
   1  -1   2  585.34   17.10
   1  -1   2  595.14   17.20
   1  -1   2  606.94   17.70
  -1  -1  -2  608.54   17.80
  -1  -1  -2  647.94   18.40
  -1  -1  -2  625.94   17.50
  -1  -1  -2  612.94   17.70
   1   1   2  635.64   18.00
   1   1   2  624.94   17.70
   1   1   2  623.34   18.30
  -1   1  -2  611.64   17.20
   1   1   2  621.24   17.50
  -1   1  -2  618.84   16.70
  -1   1  -2  590.24   16.80
  -2  -1  -2  344.57   12.70
  -2  -1  -2  362.26   12.30
   2  -1   2  330.17   11.90
   2  -1   2  341.57   11.70
   2  -1   2  341.37   12.80
  -2  -1  -2  366.26   13.20
  -2  -1  -2  366.16   13.30
  -2  -1  -2  360.46   12.30
  -2  -1  -2  360.76   13.60
   2  -1   2  352.36   11.60
  -2   1  -2  356.26   12.30
  -2   1  -2  345.57   12.30
   2   1   2  333.17   12.00
  -2   1  -2  347.37   12.00
   2   1   2  351.66   12.60
  -2   1  -2  328.47   11.00
   2   1   2  351.56   12.70
  -2   1  -2  349.47   11.30
   2   1   2  358.16   13.50
   3  -1   2  199.98    9.30
   3  -1   2  188.88   10.40
  -3  -1  -2  208.18   10.60
  -3  -1  -2  209.98   10.70
  -3  -1  -2  188.88    9.50
   3  -1   2  206.68   10.80
  -3  -1  -2  205.48    9.90
  -3  -1  -2  202.08   11.50
  -3  -1  -2  213.58   11.00
   3  -1   2  192.68    9.70
   3  -1   2  199.68    9.20
  -3   1  -2  203.58    9.80
   3   1   2  196.88   10.10
  -3   1  -2  209.48    9.90
   3   1   2  203.98    9.70
  -3   1  -2  200.88    9.90
  -3   1  -2  210.18    9.00
   3   1   2  200.78   11.20
  -3   1  -2  202.58    8.50
   3   1   2  222.58   11.40
   3   1   2  209.08   10.50
   4  -1   2 2978.30   76.19
   4  -1   2 2910.41   75.69
   4  -1   2 2956.90   75.39
   4  -1   2 3011.00   76.09
  -4  -1  -2 2924.31   75.99
  -4  -1  -2 2947.41   75.19
  -4  -1  -2 2952.20   76.09
  -4  -1  -2 2913.31   74.89
  -4  -1  -2 2912.61   75.79
   4  -1   2 2992.10   74.99
  -4  -1  -2 2836.32   76.59
   4  -1   2 2927.41   74.89
  -4   1  -2 2943.91   75.89
   4   1   2 2939.71   76.49
  -4   1  -2 2888.31   74.09
  -4   1  -2 2961.60   74.49
   4   1   2 2871.81   76.19
  -4   1  -2 2903.91   75.29
  -4   1  -2 2988.10   75.49
  -4   1  -2 2934.01   75.19
   4   1   2 2902.41   75.79
   4   1   2 2857.11   75.39
   4   1   2 2920.21   75.29
   4   1   2 2987.60   76.69
  -5  -1  -2  273.57   17.30
   5  -1   2  270.77   18.00
  -5  -1  -2  292.67   16.20
  -5  -1  -2  264.97   17.30
   5  -1   2  240.38   15.10
  -5  -1  -2  308.37   19.40
  -5  -1  -2  303.87   17.00
  -5  -1  -2  302.07   15.50
   5  -1   2  268.27   15.80
   5  -1   2  261.07   17.60
  -5   1  -2  275.07   16.00
  -5   1  -2  245.88   13.60
  -5   1  -2  276.77   15.70
  -5   1  -2  265.17   17.90
   5   1   2  285.67   18.30
  -5   1  -2  239.68   16.60
   5   1   2  275.27   16.70
  -5   1  -2  247.58   14.60
   5   1   2  299.27   19.20
   5   1   2  295.77   16.30
  -6  -1  -2   69.19   11.10
   6  -1   2   81.29   10.30
  -6  -1  -2   65.69    8.30
  -6  -1  -2   75.89    9.50
  -6  -1  -2   84.69   10.70
   6  -1   2   86.19   10.30
   6  -1   2   80.19    8.80
  -6  -1  -2   81.99    9.20
  -6  -1  -2   68.49    9.30
   6  -1   2   75.29    9.30
  -6   1  -2   72.09   10.60
  -6   1  -2   70.69    8.90
  -6   1  -2   81.39    8.70
  -6   1  -2   63.19    7.40
   6   1   2   89.89    9.60
  -6   1  -2   65.29    9.20
   6   1   2   76.79   10.90
   6   1   2   73.79   10.40
   6   1   2   80.59    9.90
  -6   1  -2   75.29    8.50
  -7  -1  -2   74.09    8.90
  -7  -1  -2   74.49   10.20
   7  -1   2   86.19   10.30
   7  -1   2   95.79   11.50
  -7  -1  -2   69.19   12.10
  -7  -1  -2   70.59   10.50
   7  -1   2   77.09   10.00
  -7  -1  -2   62.29    9.90
   7  -1   2   76.89   11.30
  -7  -1  -2   66.69   10.70
  -7   1  -2   73.09    8.20
  -7   1  -2   71.99    9.10
  -7   1  -2   73.29    9.50
  -7   1  -2   86.09   11.20
   7   1   2   70.89   10.30
  -7   1  -2   69.19    9.30
   7   1   2   64.99   10.90
   7   1   2   67.09   11.90
   7   1   2   86.39   10.20
  -7   1  -2   76.49   11.40
  -8  -1  -2  107.89   12.90
  -8  -1  -2  116.59   12.60
   8  -1   2  105.19   12.70
  -8  -1  -2  125.59   15.60
   8  -1   2  133.89   12.60
   8  -1   2  127.09   14.40
  -8  -1  -2  124.39   14.10
  -8  -1  -2  119.49   12.40
  -8  -1  -2  122.79   11.60
   8  -1   2  123.79   13.80
   8   1   2  126.29   12.80
   8   1   2  118.19   14.70
  -8   1  -2  125.79   13.60
   8   1   2   79.79   13.80
  -8   1  -2  112.69   11.80
  -8   1  -2  121.29   12.50
   8   1   2  121.99   13.50
  -8   1  -2  143.09   14.10
  -8   1  -2  123.19   14.30
  -8   1  -2  123.29   11.70
  -9  -1  -2    5.50   11.50
  -9  -1  -2   -3.10   11.00
  -9  -1  -2   27.00   14.90
  -9  -1  -2    3.00   11.30
   9  -1   2    6.70   13.10
   9  -1   2    2.30   12.70
  -9  -1  -2    6.70   13.20
   9  -1   2    7.10   11.10
  -9  -1  -2    6.70    9.80
   9  -1   2   12.40   11.80
  -9   1  -2   12.90   12.40
  -9   1  -2    3.70    9.10
   9   1   2   14.20   13.80
   9   1   2    9.90   11.20
  -9   1  -2   -1.00   10.40
  -9   1  -2    3.80    6.80
   9   1   2   17.30   12.20
   9   1   2    1.20   13.10
  -9   1  -2    4.60   13.10
  -9   1  -2   -0.20   11.00
 -10  -1  -2   32.70   13.20
 -10  -1  -2   46.70   14.30
  10  -1   2   65.39   16.20
 -10  -1  -2   56.49   16.80
  10  -1   2   78.69   14.40
 -10  -1  -2   57.69   12.20
 -10  -1  -2   60.79   15.30
 -10   1  -2   62.89   15.10
  10   1   2   33.60   14.70
 -10   1  -2   62.79   12.60
  10   1   2   58.59   16.30
 -10   1  -2   54.49   11.00
  10   1   2   71.79   14.70
 -10   1  -2   67.09   16.10
 -11  -1  -2   11.50   16.40
 -11  -1  -2   21.30   13.00
  11  -1   2   29.30   17.00
 -11  -1  -2   -4.10   14.10
  11  -1   2   26.30   16.00
 -11  -1  -2   11.70   14.10
 -11  -1  -2    0.40   12.50
  11  -1   2   27.20   14.20
 -11  -1  -2   35.70   14.60
  11   1   2   35.10   18.20
  11   1   2   47.40   16.10
 -11   1  -2   11.30   12.00
 -11   1  -2   24.80   13.20
 -11   1  -2   29.70   14.50
 -11   1  -2    6.20   13.70
 -11   1  -2   13.90   15.90
  11   1   2   42.80   14.30
 -11   1  -2   10.80   10.80
 -12  -2   2   69.09   15.80
 -12  -2   2   58.29   16.50
 -12  -2   2   41.20   16.40
  12  -2  -2   65.49   15.50
 -12  -2   2   45.20   15.30
 -12  -2   2   14.50   14.60
  12  -2  -2   73.09   16.70
  12  -2  -2   79.59   17.70
  12  -2  -2   66.19   18.80
 -12  -2   2   77.59   19.10
  12   2  -2   58.59   16.30
 -12   2   2    6.60   13.20
  12   2  -2   57.19   18.80
  12   2  -2   54.89   18.00
 -12   2   2   71.89   15.50
 -12   2   2   58.49   13.70
  12   2  -2   83.39   17.20
 -12   2   2   65.29   17.30
 -12   2   2   42.10   14.70
 -12   2   2   64.09   12.50
  11  -2  -2   16.80   15.00
 -11  -2   2   32.40   15.50
  11  -2  -2   33.80   13.80
 -11  -2   2    7.40   12.50
 -11  -2   2   26.00   14.10
 -11  -2   2   20.40   14.20
 -11  -2   2   41.90   17.60
  11  -2  -2    2.40   13.20
  11  -2  -2   22.20   15.00
 -11   2   2    9.10   14.70
  11   2  -2    9.20   13.60
  11   2  -2   35.10   16.00
 -11   2   2   18.40   14.30
 -11   2   2   20.40   10.90
  11   2  -2   16.80   16.10
  11   2  -2   15.70   14.60
 -11   2   2   -1.40   11.30
 -10  -2   2   26.60   12.60
 -10  -2   2   27.70   15.70
  10  -2  -2   30.70   12.50
 -10  -2   2   30.50   13.30
 -10  -2   2   34.50   12.00
  10  -2  -2   23.50   12.10
  10  -2  -2   36.60   14.10
 -10  -2   2   39.80   14.20
  10  -2  -2   30.30   12.50
 -10   2   2   34.90   11.60
 -10   2   2   39.80   11.20
  10   2  -2    3.30   13.60
 -10   2   2   36.00   13.50
 -10   2   2   41.40   10.70
  10   2  -2   45.60   13.20
  10   2  -2   47.20   12.90
 -10   2   2    2.20   14.20
  10   2  -2    6.20   12.90
  -9  -2   2  233.58   24.90
  -9  -2   2  251.17   19.90
   9  -2  -2  261.17   22.60
  -9  -2   2  236.08   22.40
   9  -2  -2  227.28   20.90
   9  -2  -2  234.08   19.40
  -9  -2   2  244.28   18.30
  -9  -2   2  243.38   20.70
   9  -2  -2  263.67   19.10
  -9  -2   2  230.68   19.60
   9   2  -2  265.27   23.40
  -9   2   2  246.38   18.90
   9   2  -2  261.97   20.30
  -9   2   2  262.37   17.00
   9   2  -2  261.87   20.70
  -9   2   2  241.08   17.80
  -9   2   2  265.37   19.70
   9   2  -2  269.87   22.40
  -9   2   2  244.98   22.80
   8  -2  -2   39.10    8.90
   8  -2  -2   29.50   10.20
   8  -2  -2   30.40    9.40
  -8  -2   2   48.20    9.30
  -8  -2   2   35.60    9.90
   8  -2  -2   32.90    9.90
  -8  -2   2   41.60    9.50
  -8  -2   2   40.00   10.00
  -8   2   2   39.70    8.60
   8   2  -2   42.10    9.10
  -8   2   2   27.10    9.00
   8   2  -2   33.00   10.80
  -8   2   2   24.30    7.90
  -8   2   2   33.00    8.50
   8   2  -2   39.50   10.30
   8   2  -2   44.80   10.60
   7  -2  -2  129.79   14.20
   7  -2  -2  142.79   15.10
   7  -2  -2  163.58   13.50
  -7  -2   2  154.78   15.00
   7  -2  -2  157.58   14.00
  -7  -2   2  154.58   13.30
  -7  -2   2  139.49   14.10
  -7  -2   2  161.48   14.40
   7   2  -2  166.08   13.90
   7   2  -2  164.08   14.60
  -7   2   2  149.19   12.70
  -7   2   2  139.49   12.90
  -7   2   2  136.99   13.10
   7   2  -2  172.68   16.60
   7   2  -2  169.08   15.50
  -7   2   2  139.39   12.00
  -6  -2   2  751.02   26.00
  -6  -2   2  733.73   25.20
  -6  -2   2  743.73   25.30
   6  -2  -2  736.83   25.60
  -6  -2   2  720.23   24.50
   6  -2  -2  743.73   24.40
   6  -2  -2  731.03   24.30
   6  -2  -2  746.03   25.10
   6   2  -2  749.73   26.20
   6   2  -2  734.13   26.70
  -6   2   2  729.83   23.60
  -6   2   2  714.83   23.20
   6   2  -2  716.53   25.20
  -6   2   2  731.13   24.50
   6   2  -2  706.53   25.10
  -6   2   2  714.73   24.00
  -5  -2   2  970.00   29.50
   5  -2  -2  969.40   29.20
   5  -2  -2  999.80   29.10
  -5  -2   2  966.40   30.10
   5  -2  -2  955.40   29.50
  -5  -2   2  962.90   30.00
  -5  -2   2  982.30   30.60
   5  -2  -2 1041.30   30.20
  -5   2   2  969.00   28.60
   5   2  -2  970.30   30.00
   5   2  -2  992.30   30.20
   5   2  -2  914.11   31.00
  -5   2   2  949.40   29.30
  -5   2   2  983.90   28.20
  -5   2   2  951.20   28.90
   5   2  -2  959.90   30.30
   4  -2  -2   25.60    5.10
   4  -2  -2   18.90    4.80
  -4  -2   2   17.00    5.00
  -4  -2   2   21.70    5.30
   4  -2  -2   18.00    5.20
   4  -2  -2   21.10    4.80
  -4  -2   2   20.00    5.60
  -4  -2   2   25.10    5.90
   4   2  -2   23.50    6.00
  -4   2   2   19.70    4.90
   4   2  -2   16.20    5.20
  -4   2   2   23.30    4.90
  -4   2   2   16.30    4.50
   4   2  -2   16.30    5.10
  -4   2   2   15.00    4.40
   4   2  -2   20.90    5.60
  -3  -2   2  180.58    9.10
   3  -2  -2  181.68    8.70
   3  -2  -2  183.18    8.40
  -3  -2   2  183.18    8.80
   3  -2  -2  174.68    8.30
  -3  -2   2  195.08    9.40
  -3  -2   2  183.18    9.20
   3  -2  -2  173.98    8.10
   3   2  -2  179.88    9.00
   3   2  -2  188.68    9.10
  -3   2   2  180.98    7.90
   3   2  -2  182.88    9.50
  -3   2   2  191.78    8.00
   3   2  -2  175.18    8.80
  -3   2   2  181.58    8.50
  -3   2   2  181.88    8.10
   2  -2  -2  166.58    7.90
  -2  -2   2  165.88    8.10
  -2  -2   2  164.48    8.80
   2  -2  -2  156.18    7.90
  -2  -2   2  162.28    8.80
   2  -2  -2  162.78    8.30
  -2  -2   2  159.98    8.60
  -2   2   2  156.28    8.30
  -2   2   2  160.18    7.70
  -2   2   2  161.38    7.70
   2   2  -2  156.38    8.80
   2   2  -2  171.88    8.40
  -2   2   2  155.08    7.70
   2   2  -2  160.08    8.80
   2   2  -2  165.58    8.60
  -1  -2   2  414.46   12.70
   1  -2  -2  414.36   12.80
  -1  -2   2  433.06   12.60
   1  -2  -2  444.66   12.80
   1  -2  -2  432.46   13.10
  -1  -2   2  415.66   12.90
   1   2  -2  439.96   12.50
  -1   2   2  429.46   12.80
  -1   2   2  459.15   12.70
   1   2  -2  416.56   12.60
  -1   2   2  435.86   13.10
   1   2  -2  437.46   12.80
   0  -2   2 2409.46   61.09
   0  -2  -2 2479.25   61.79
   0  -2  -2 2466.45   61.39
   0  -2   2 2477.05   61.19
   0  -2   2 2504.75   60.89
   0  -2  -2 2407.86   61.59
   0   2  -2 2538.85   60.79
   0   2   2 2449.66   61.59
   0   2  -2 2423.66   61.09
   0   2   2 2457.55   61.79
   0   2   2 2495.75   61.39
   1  -2   2 4028.80   96.49
   1  -2   2 3973.00   96.99
  -1  -2  -2 3893.61   97.59
   1  -2   2 4009.50   96.89
  -1  -2  -2 3970.50   97.39
  -1  -2  -2 3908.41   97.59
   1  -2   2 3782.52   96.59
  -1   2  -2 3838.82   96.29
   1   2   2 3835.52   97.79
   1   2   2 3920.01   97.29
   1   2   2 3962.90   97.69
   1   2   2 3883.31   97.49
  -1   2  -2 4060.89   96.29
  -2  -2  -2 3285.77   83.49
   2  -2   2 3478.35   83.09
   2  -2   2 3275.27   82.59
  -2  -2  -2 3399.66   83.29
   2  -2   2 3296.27   82.29
  -2  -2  -2 3324.37   83.19
  -2  -2  -2 3320.57   83.69
   2  -2   2 3321.77   82.29
  -2  -2  -2 3297.77   83.79
  -2  -2  -2 3303.37   83.99
  -2   2  -2 3459.75   81.99
  -2   2  -2 3311.47   82.59
  -2   2  -2 3301.77   82.69
  -2   2  -2 3237.48   81.89
   2   2   2 3346.67   83.99
   2   2   2 3303.47   83.39
   2   2   2 3274.37   83.09
  -2   2  -2 3304.17   82.69
   2   2   2 3282.57   83.39
  -3  -2  -2  617.94   18.70
   3  -2   2  587.54   18.10
   3  -2   2  609.44   17.60
   3  -2   2  587.94   17.60
  -3  -2  -2  601.94   19.50
  -3  -2  -2  607.64   20.30
  -3  -2  -2  615.24   18.80
  -3  -2  -2  607.94   19.70
  -3  -2  -2  620.14   19.50
   3  -2   2  606.64   18.90
   3  -2   2  584.74   18.70
   3   2   2  631.54   19.20
   3   2   2  607.14   20.10
  -3   2  -2  577.94   18.10
  -3   2  -2  604.64   18.10
   3   2   2  612.24   19.20
   3   2   2  603.04   18.70
   3   2   2  592.24   19.90
  -3   2  -2  627.04   17.20
  -3   2  -2  607.64   18.10
  -3   2  -2  570.04   16.80
  -4  -2  -2 1903.61   52.29
   4  -2   2 1920.51   51.39
  -4  -2  -2 1896.21   51.99
  -4  -2  -2 1855.61   52.89
   4  -2   2 1869.11   51.49
  -4  -2  -2 1893.11   51.19
   4  -2   2 1940.51   50.39
   4  -2   2 1924.21   50.39
   4  -2   2 1914.71   50.89
  -4  -2  -2 1952.40   51.19
   4  -2   2 1932.51   51.79
  -4  -2  -2 1937.91   52.19
  -4   2  -2 1910.01   49.30
   4   2   2 1913.61   51.49
  -4   2  -2 1889.11   50.69
  -4   2  -2 1929.11   50.89
   4   2   2 1942.71   53.09
  -4   2  -2 1986.50   49.70
  -4   2  -2 1928.51   50.59
   4   2   2 1891.21   51.19
   4   2   2 1912.71   51.99
   4   2   2 1949.41   52.59
   4   2   2 1930.31   52.79
  -5  -2  -2  758.92   25.60
   5  -2   2  765.92   25.30
  -5  -2  -2  760.42   27.50
  -5  -2  -2  830.12   29.40
  -5  -2  -2  826.12   26.40
   5  -2   2  750.42   26.80
  -5  -2  -2  795.52   27.80
   5  -2   2  767.02   24.90
   5  -2   2  749.33   27.00
  -5  -2  -2  804.02   27.20
   5   2   2  782.22   26.30
  -5   2  -2  753.12   25.30
   5   2   2  800.92   28.30
  -5   2  -2  805.92   24.30
  -5   2  -2  776.32   23.50
   5   2   2  796.22   26.90
  -5   2  -2  790.72   26.00
   5   2   2  830.82   28.80
  -5   2  -2  780.02   25.50
   6  -2   2 1739.33   48.30
   6  -2   2 1769.92   48.30
   6  -2   2 1695.53   49.50
  -6  -2  -2 1767.92   49.40
  -6  -2  -2 1765.32   51.29
  -6  -2  -2 1789.52   49.90
   6  -2   2 1724.43   49.70
  -6  -2  -2 1827.72   48.50
  -6  -2  -2 1763.72   48.80
  -6  -2  -2 1786.02   50.19
  -6   2  -2 1755.92   46.60
   6   2   2 1813.52   51.09
  -6   2  -2 1748.13   48.30
  -6   2  -2 1727.83   48.80
  -6   2  -2 1749.92   48.10
   6   2   2 1753.52   50.49
   6   2   2 1809.12   49.50
   6   2   2 1811.12   49.20
  -6   2  -2 1789.62   47.20
  -6   2  -2 1569.94   48.90
   7  -2   2  406.86   18.70
   7  -2   2  421.46   19.50
  -7  -2  -2  427.56   18.60
   7  -2   2  390.86   20.80
  -7  -2  -2  441.56   23.60
  -7  -2  -2  414.46   21.70
   7  -2   2  379.66   21.10
  -7  -2  -2  394.66   20.40
  -7  -2  -2  431.76   19.60
  -7  -2  -2  422.96   20.20
  -7   2  -2  357.86   21.20
  -7   2  -2  399.26   20.10
   7   2   2  394.16   20.30
   7   2   2  409.76   19.60
  -7   2  -2  401.46   18.60
   7   2   2  435.46   22.20
  -7   2  -2  398.76   17.40
  -7   2  -2  433.76   18.60
   7   2   2  413.86   22.70
  -7   2  -2  378.86   16.10
   8  -2   2  503.45   26.00
   8  -2   2  517.05   23.80
  -8  -2  -2  519.55   22.30
  -8  -2  -2  470.75   23.50
  -8  -2  -2  499.55   24.10
   8  -2   2  548.25   23.30
  -8  -2  -2  491.05   25.00
   8  -2   2  534.55   25.60
  -8  -2  -2  508.55   26.20
  -8  -2  -2  500.35   27.90
  -8   2  -2  549.95   24.60
  -8   2  -2  544.95   23.10
  -8   2  -2  512.25   20.00
   8   2   2  494.45   27.30
   8   2   2  505.25   27.20
  -8   2  -2  543.45   21.50
   8   2   2  505.05   23.90
   8   2   2  481.65   24.60
  -8   2  -2  543.85   23.00
  -8   2  -2  531.85   26.40
   9  -2   2  368.16   24.00
  -9  -2  -2  336.47   24.80
   9  -2   2  340.17   26.30
   9  -2   2  384.56   22.40
  -9  -2  -2  392.16   29.40
   9  -2   2  327.27   25.60
  -9  -2  -2  360.46   26.60
  -9  -2  -2  400.76   21.60
  -9  -2  -2  372.86   23.10
   9   2   2  372.46   28.10
  -9   2  -2  377.56   18.70
   9   2   2  369.96   24.80
  -9   2  -2  338.47   22.20
   9   2   2  377.06   26.90
  -9   2  -2  383.86   24.70
  -9   2  -2  328.17   26.10
  -9   2  -2  371.66   20.00
   9   2   2  396.26   24.00
 -10  -2  -2  438.36   32.60
 -10  -2  -2  417.76   29.70
  10  -2   2  397.76   26.30
  10  -2   2  450.05   30.10
 -10  -2  -2  442.86   27.70
 -10  -2  -2  430.36   24.30
 -10  -2  -2  402.96   26.00
  10  -2   2  438.86   27.70
 -10   2  -2  422.16   22.10
 -10   2  -2  418.36   28.50
 -10   2  -2  411.16   27.90
  10   2   2  406.46   27.70
  10   2   2  425.16   27.30
  10   2   2  415.56   31.80
 -10   2  -2  457.25   20.90
 -11  -2  -2  500.15   37.50
 -11  -2  -2  575.04   27.50
 -11  -2  -2  563.04   30.10
 -11  -2  -2  532.25   32.40
  11  -2   2  492.55   31.90
  11  -2   2  519.15   34.80
  11  -2   2  506.45   29.70
 -11  -2  -2  490.15   34.40
  11   2   2  573.14   32.60
 -11   2  -2  519.35   29.00
  11   2   2  522.45   36.00
 -11   2  -2  528.55   32.20
  11   2   2  559.04   31.40
 -11   2  -2  508.45   23.00
 -11   2  -2  525.45   25.50
  12  -3  -2   37.90   17.60
  12  -3  -2   67.39   15.50
 -12  -3   2   45.10   18.50
  12  -3  -2   86.19   16.90
 -12  -3   2   57.89   16.30
 -12  -3   2   36.30   13.90
 -12  -3   2    9.90   16.20
 -12  -3   2   43.50   16.40
 -12  -3   2   46.20   17.30
  12  -3  -2   38.30   16.80
  12   3  -2   75.99   17.00
 -12   3   2   57.49   13.20
  12   3  -2   40.50   19.20
 -12   3   2    4.60   12.30
 -12   3   2   29.90   14.50
 -12   3   2   30.30   10.20
 -12   3   2   36.00   17.00
  12   3  -2   46.90   15.90
  12   3  -2   42.10   17.80
 -12   3   2   24.50   14.40
 -11  -3   2  865.81   37.70
  11  -3  -2  780.82   33.20
 -11  -3   2  839.02   36.30
 -11  -3   2  863.51   41.50
  11  -3  -2  760.52   35.00
  11  -3  -2  824.02   36.90
 -11  -3   2  680.43   33.70
 -11  -3   2  714.03   32.00
  11  -3  -2  727.23   33.40
 -11   3   2  783.52   28.60
  11   3  -2  828.42   34.30
  11   3  -2  843.02   39.40
 -11   3   2  782.12   29.50
 -11   3   2  752.22   35.20
  11   3  -2  855.01   35.90
  11   3  -2  751.62   37.90
  10  -3  -2   77.09   14.50
  10  -3  -2  133.79   14.60
 -10  -3   2  104.79   15.50
 -10  -3   2  150.98   19.20
 -10  -3   2  132.89   17.00
 -10  -3   2  111.29   13.90
  10  -3  -2  125.89   14.60
 -10  -3   2  151.18   15.80
  10  -3  -2   81.89   15.20
  10   3  -2  129.69   15.60
  10   3  -2  140.09   16.10
 -10   3   2  122.79   13.70
 -10   3   2  145.99   17.10
  10   3  -2  103.09   16.40
 -10   3   2  119.19   12.70
 -10   3   2  129.59   15.70
 -10   3   2  136.19   12.00
   9  -3  -2 1217.28   41.20
   9  -3  -2 1216.58   40.50
  -9  -3   2 1186.28   44.00
  -9  -3   2 1232.28   41.90
  -9  -3   2 1229.78   39.10
  -9  -3   2 1191.48   40.50
   9  -3  -2 1250.17   39.40
  -9  -3   2 1230.98   41.20
  -9  -3   2 1264.07   40.50
   9  -3  -2 1239.48   39.60
   9   3  -2 1195.88   40.60
  -9   3   2 1279.37   36.80
  -9   3   2 1251.27   37.10
   9   3  -2 1221.08   43.10
   9   3  -2 1229.48   40.50
  -9   3   2 1273.77   39.30
  -9   3   2 1305.47   39.00
  -9   3   2 1174.48   41.60
   9   3  -2 1240.58   42.40
   8  -3  -2  102.29   10.90
   8  -3  -2  102.69   11.30
   8  -3  -2   93.69   10.40
  -8  -3   2   94.99   12.00
  -8  -3   2  110.59   11.10
   8  -3  -2  113.09   11.90
  -8  -3   2  101.89   11.60
  -8  -3   2   95.99   14.10
  -8  -3   2   82.69   11.30
  -8   3   2  104.99    9.40
  -8   3   2  110.69   10.00
  -8   3   2  122.79   10.50
  -8   3   2  116.09   11.10
   8   3  -2   90.39   11.80
   8   3  -2   97.59   12.70
   8   3  -2   87.69   11.30
   8   3  -2  115.39   12.20
  -7  -3   2 2248.58   60.99
   7  -3  -2 2195.98   60.89
  -7  -3   2 2235.58   60.29
   7  -3  -2 2189.08   59.79
  -7  -3   2 2248.88   60.99
   7  -3  -2 2179.28   59.99
   7  -3  -2 2273.17   60.59
  -7  -3   2 2191.88   61.39
  -7   3   2 2226.38   58.79
  -7   3   2 2278.07   58.59
   7   3  -2 2261.17   60.99
  -7   3   2 2222.18   59.69
  -7   3   2 2185.08   59.89
   7   3  -2 2291.77   60.99
   7   3  -2 2256.97   61.89
   7   3  -2 2288.07   62.39
   6  -3  -2  197.58   13.60
   6  -3  -2  197.68   13.70
  -6  -3   2  197.28   14.60
  -6  -3   2  196.98   15.30
   6  -3  -2  186.88   14.20
  -6  -3   2  197.58   14.90
   6  -3  -2  209.58   15.20
  -6  -3   2  195.88   15.80
  -6   3   2  194.78   13.00
   6   3  -2  199.98   14.90
  -6   3   2  170.58   13.60
  -6   3   2  202.48   12.20
   6   3  -2  190.08   16.00
   6   3  -2  183.08   17.10
   6   3  -2  217.58   15.50
  -6   3   2  204.38   12.20
  -5  -3   2 5319.27  129.59
  -5  -3   2 5211.88  129.89
   5  -3  -2 5029.70  128.79
  -5  -3   2 5212.88  130.29
   5  -3  -2 5143.58  129.09
  -5  -3   2 5183.58  129.89
   5  -3  -2 5128.69  129.39
   5  -3  -2 5044.80  128.59
   5   3  -2 5102.49  130.09
  -5   3   2 5125.19  128.79
   5   3  -2 5158.98  129.89
   5   3  -2 5130.49  130.49
   5   3  -2 5211.58  129.69
  -5   3   2 5082.79  128.19
  -5   3   2 5080.69  128.99
  -5   3   2 5269.57  128.09
  -4  -3   2 1170.28   32.90
   4  -3  -2 1197.58   32.00
   4  -3  -2 1213.28   32.40
   4  -3  -2 1183.98   32.60
  -4  -3   2 1166.78   33.60
   4  -3  -2 1193.08   32.20
  -4  -3   2 1139.69   33.20
  -4  -3   2 1153.08   33.20
  -4   3   2 1247.98   31.60
   4   3  -2 1165.78   33.80
  -4   3   2 1186.58   31.60
  -4   3   2 1226.28   32.20
   4   3  -2 1189.38   33.10
   4   3  -2 1166.48   33.30
   4   3  -2 1185.88   33.30
  -4   3   2 1213.28   32.40
   3  -3  -2 1006.00   26.50
  -3  -3   2  964.30   27.40
   3  -3  -2 1005.10   26.90
  -3  -3   2  994.90   27.50
   3  -3  -2  998.70   26.70
  -3  -3   2  987.70   27.70
   3  -3  -2  974.30   26.60
  -3  -3   2  985.70   27.20
   3   3  -2  993.00   27.20
  -3   3   2 1048.50   26.20
   3   3  -2  957.40   27.40
   3   3  -2  946.01   27.70
  -3   3   2 1007.50   26.80
  -3   3   2 1026.70   26.20
  -3   3   2 1008.60   26.60
   3   3  -2  982.70   27.50
  -2  -3   2  363.16   12.40
  -2  -3   2  360.76   12.80
   2  -3  -2  385.26   11.80
  -2  -3   2  359.16   12.80
   2  -3  -2  355.26   12.10
   2  -3  -2  377.56   11.90
  -2  -3   2  364.86   12.70
   2   3  -2  364.56   12.80
   2   3  -2  362.66   12.60
  -2   3   2  365.06   12.00
   2   3  -2  354.66   12.80
  -2   3   2  361.66   11.40
  -2   3   2  391.76   11.40
   2   3  -2  373.26   12.40
  -2   3   2  368.66   11.80
   1  -3  -2 1372.46   35.80
   1  -3  -2 1379.16   35.60
   1  -3  -2 1407.86   35.40
  -1  -3   2 1395.46   35.60
  -1  -3   2 1371.36   35.50
  -1  -3   2 1376.66   35.30
  -1   3   2 1410.06   35.20
  -1   3   2 1383.26   35.70
   1   3  -2 1415.16   35.20
  -1   3   2 1370.86   35.50
   1   3  -2 1355.46   35.40
   0  -3  -2  211.88   10.10
   0  -3  -2  219.78    9.20
   0  -3   2  241.58    8.00
   0  -3   2  216.18    7.70
   0  -3  -2  203.18    9.70
   0  -3  -2  215.98    8.80
   0  -3   2  224.58    7.10
   0   3   2  223.48    8.60
   0   3   2  222.08    9.60
   0   3   2  210.88    8.90
   0   3  -2  198.78    7.20
   0   3  -2  224.78    6.70
   1  -3   2   30.90    2.80
  -1  -3  -2   35.50    5.70
   1  -3   2   34.50    3.60
  -1  -3  -2   43.20    5.30
   1  -3   2   35.00    3.90
  -1  -3  -2   34.10    5.10
  -1  -3  -2   34.70    5.30
   1  -3   2   24.50    3.00
   1   3   2   25.80    5.50
  -1   3  -2   35.20    3.50
   1   3   2   19.60    4.70
   1   3   2   23.80    4.60
   1   3   2   33.00    5.50
  -2  -3  -2   14.20    5.00
  -2  -3  -2    1.50    4.00
   2  -3   2    8.20    3.20
  -2  -3  -2    2.20    4.90
  -2  -3  -2    6.20    4.70
  -2  -3  -2    8.70    4.60
   2  -3   2    9.00    2.90
   2  -3   2   11.60    2.90
   2  -3   2    9.20    3.80
  -2  -3  -2    3.40    4.20
  -2   3  -2    5.60    1.80
   2   3   2   15.20    4.60
  -2   3  -2    7.30    1.90
  -2   3  -2    1.30    3.10
  -2   3  -2    7.50    3.20
   2   3   2    4.80    4.60
   2   3   2   11.30    5.20
   2   3   2   11.70    4.40
  -2   3  -2    8.50    3.40
   3  -3   2  412.36   13.40
   3  -3   2  471.35   15.10
  -3  -3  -2  449.56   15.50
  -3  -3  -2  442.46   16.10
   3  -3   2  399.86   14.00
   3  -3   2  421.66   14.70
  -3  -3  -2  447.66   16.10
  -3  -3  -2  448.16   15.30
  -3  -3  -2  445.36   16.50
   3  -3   2  403.66   13.40
  -3  -3  -2  433.36   17.10
  -3   3  -2  418.56   14.40
   3   3   2  437.56   15.90
  -3   3  -2  405.66   13.80
  -3   3  -2  426.06   14.00
  -3   3  -2  418.76   13.90
   3   3   2  434.46   15.10
   3   3   2  446.16   16.90
   3   3   2  455.75   16.80
   3   3   2  432.36   15.60
  -3   3  -2  413.96   12.20
  -3   3  -2  441.36   12.50
  -4  -3  -2  398.96   19.50
   4  -3   2  386.86   15.40
   4  -3   2  406.96   15.40
   4  -3   2  392.96   17.60
   4  -3   2  422.16   16.40
  -4  -3  -2  371.56   20.70
  -4  -3  -2  381.96   19.10
  -4  -3  -2  370.66   17.50
  -4  -3  -2  379.16   17.80
   4  -3   2  417.76   17.60
  -4  -3  -2  385.26   18.80
   4  -3   2  398.46   17.40
   4   3   2  368.46   18.20
  -4   3  -2  381.66   13.20
   4   3   2  404.46   18.90
  -4   3  -2  391.46   14.00
   4   3   2  398.26   20.30
  -4   3  -2  393.56   15.90
  -4   3  -2  391.86   16.20
   4   3   2  390.96   20.40
  -4   3  -2  393.26   15.80
   4   3   2  386.86   17.50
   5  -3   2 1034.30   30.10
  -5  -3  -2  973.20   32.10
  -5  -3  -2 1004.70   32.90
   5  -3   2 1054.79   31.80
   5  -3   2 1042.80   31.60
  -5  -3  -2 1024.60   33.00
   5  -3   2 1041.40   30.10
  -5  -3  -2  983.50   31.60
  -5  -3  -2 1018.40   31.20
  -5  -3  -2  982.90   34.30
  -5   3  -2 1042.20   30.10
  -5   3  -2 1015.80   28.00
   5   3   2 1017.00   33.80
   5   3   2  968.10   33.40
  -5   3  -2  993.00   30.50
   5   3   2 1007.60   31.60
  -5   3  -2 1044.10   30.30
  -5   3  -2 1045.00   28.60
   5   3   2  993.50   32.00
  -6  -3  -2  346.47   17.70
  -6  -3  -2  346.07   18.00
  -6  -3  -2  332.77   16.60
  -6  -3  -2  334.47   18.60
   6  -3   2  318.77   17.70
   6  -3   2  311.27   15.60
   6  -3   2  322.87   17.70
  -6  -3  -2  322.47   20.50
  -6  -3  -2  343.97   19.10
   6  -3   2  326.97   16.00
   6   3   2  357.26   20.10
  -6   3  -2  321.47   14.00
   6   3   2  325.47   18.00
   6   3   2  327.67   19.60
  -6   3  -2  318.07   13.00
  -6   3  -2  319.27   15.30
   6   3   2  336.07   17.10
  -6   3  -2  337.17   15.80
  -6   3  -2  310.77   16.40
  -7  -3  -2   62.19   10.20
  -7  -3  -2   63.29   12.50
  -7  -3  -2   46.10    9.00
   7  -3   2   55.29   10.40
   7  -3   2   43.50   10.00
  -7  -3  -2   34.70    9.90
  -7  -3  -2   52.79   10.50
  -7  -3  -2   50.69    9.80
   7  -3   2   45.50    8.70
   7  -3   2   50.09    9.30
   7   3   2   39.90    9.80
  -7   3  -2   58.69    7.80
  -7   3  -2   38.30    8.40
  -7   3  -2   51.79    8.60
  -7   3  -2   67.99   10.10
   7   3   2   55.29   11.70
  -7   3  -2   51.09    6.90
   7   3   2   43.30   10.80
   7   3   2   53.49    9.60
  -8  -3  -2   15.40   10.50
  -8  -3  -2   34.40   10.10
  -8  -3  -2   10.70   11.30
  -8  -3  -2   20.20   10.80
   8  -3   2    7.40   11.30
  -8  -3  -2    6.90   12.30
   8  -3   2   23.60    9.50
  -8  -3  -2   24.30   13.90
   8  -3   2   33.70   10.90
   8  -3   2   20.80   11.10
   8   3   2    8.30   11.50
  -8   3  -2   28.20   10.80
  -8   3  -2   27.40    7.60
  -8   3  -2   27.30    9.60
  -8   3  -2   11.60    8.90
   8   3   2   18.70   10.20
   8   3   2    5.90   11.90
  -8   3  -2   21.80    8.30
   8   3   2   19.10   11.40
   9  -3   2   22.40   12.90
  -9  -3  -2   -0.80   14.70
  -9  -3  -2   22.90   11.30
  -9  -3  -2   16.20   12.50
  -9  -3  -2   19.00   12.70
   9  -3   2  -11.80   11.40
   9  -3   2   16.50   13.20
  -9  -3  -2   30.60   13.40
   9  -3   2    7.70   10.70
  -9   3  -2   14.40   12.10
  -9   3  -2   12.10    8.40
   9   3   2    1.40   12.60
  -9   3  -2   23.90   10.60
  -9   3  -2    3.50    9.50
   9   3   2   33.20   14.70
  -9   3  -2    1.00   10.60
   9   3   2   22.30   14.30
   9   3   2  -10.00   11.10
  10  -3   2   81.39   16.10
 -10  -3  -2   91.19   18.60
 -10  -3  -2   90.69   14.10
 -10  -3  -2   62.79   16.00
  10  -3   2   83.99   14.20
  10  -3   2   56.79   14.40
 -10  -3  -2   61.09   15.60
 -10  -3  -2   69.29   14.80
 -10   3  -2   64.19   10.10
  10   3   2   66.09   14.50
  10   3   2   31.00   14.90
 -10   3  -2   36.30   13.40
  10   3   2   77.49   18.00
 -10   3  -2   58.49   11.50
 -10   3  -2   93.49   15.20
 -11  -3  -2   97.59   17.80
 -11  -3  -2   99.59   19.20
  11  -3   2  103.79   17.40
  11  -3   2  108.19   16.30
  11  -3   2   73.79   18.00
 -11  -3  -2   81.09   15.30
 -11  -3  -2   83.59   16.80
 -11   3  -2  132.49   18.00
 -11   3  -2   92.29   15.20
  11   3   2   86.49   17.00
  11   3   2  109.59   18.80
  11   3   2   68.59   20.00
 -11   3  -2  123.99   13.20
 -12  -4   2   -0.30   15.70
 -12  -4   2   -9.00   16.40
  12  -4  -2   -9.00   16.70
 -12  -4   2  -10.40   12.20
 -12  -4   2  -10.90   18.00
  12  -4  -2   -8.50   15.70
 -12  -4   2    9.60   15.30
  12  -4  -2   35.50   14.70
  12  -4  -2  -10.10   14.60
 -12  -4   2  -27.40   19.10
  12   4  -2  -20.60   16.30
  12   4  -2   -3.60   18.90
 -12   4   2  -14.60   13.10
  12   4  -2   -5.00   14.90
  12   4  -2   25.60   16.20
 -12   4   2   10.20   16.40
 -12   4   2  -19.00   12.00
 -12   4   2   -7.50    7.90
 -12   4   2    8.90   11.60
 -12   4   2    6.70   13.10
  11  -4  -2   60.09   14.80
  11  -4  -2   59.29   14.20
  11  -4  -2   68.29   16.50
 -11  -4   2   46.70   15.70
 -11  -4   2   59.89   15.40
 -11  -4   2   60.09   16.90
  11  -4  -2   51.49   13.80
 -11  -4   2   74.29   18.90
 -11  -4   2   59.39   14.70
 -11   4   2   65.29   11.50
 -11   4   2   66.99   10.70
 -11   4   2   44.00   14.20
  11   4  -2   40.40   16.60
  11   4  -2   69.89   18.20
  11   4  -2   58.49   16.00
 -10  -4   2    5.00   12.00
 -10  -4   2   11.00   12.90
 -10  -4   2   20.20   16.20
 -10  -4   2    9.70   13.40
 -10  -4   2    9.70    7.80
  10  -4  -2   -1.50   12.20
 -10  -4   2    8.80   14.20
  10  -4  -2   -0.10   11.40
  10  -4  -2   12.00   13.00
  10  -4  -2   -6.90   10.90
  10   4  -2   16.00   14.00
 -10   4   2    7.70   12.20
 -10   4   2   14.50    9.80
 -10   4   2    1.60   10.90
  10   4  -2    3.80   14.30
 -10   4   2   -1.80    9.10
 -10   4   2   20.10   14.30
  10   4  -2   12.40   12.70
   9  -4  -2  235.78   19.80
  -9  -4   2  271.77   21.40
  -9  -4   2  257.77   23.00
   9  -4  -2  260.07   20.80
  -9  -4   2  268.47   21.30
  -9  -4   2  266.87   22.70
  -9  -4   2  272.27   19.80
   9  -4  -2  240.68   18.60
   9  -4  -2  259.77   22.10
  -9  -4   2  284.27   26.60
  -9   4   2  243.88   18.30
   9   4  -2  238.08   24.20
   9   4  -2  280.37   20.80
  -9   4   2  222.58   22.40
  -9   4   2  259.97   16.60
  -9   4   2  232.38   15.60
  -9   4   2  243.18   20.50
   9   4  -2  241.88   21.30
   9   4  -2  267.07   23.30
  -9   4   2  247.78   18.20
  -8  -4   2  177.18   16.70
   8  -4  -2  181.48   15.20
   8  -4  -2  176.78   15.70
  -8  -4   2  164.48   17.30
   8  -4  -2  178.78   16.70
   8  -4  -2  156.58   16.90
  -8  -4   2  162.28   13.90
  -8  -4   2  158.88   17.10
  -8  -4   2  183.08   16.50
   8   4  -2  178.38   19.70
  -8   4   2  163.18   13.10
  -8   4   2  152.18   15.00
  -8   4   2  141.69   14.60
   8   4  -2  186.08   17.40
   8   4  -2  183.68   17.00
  -8   4   2  170.08   12.70
   8   4  -2  176.18   19.10
   7  -4  -2  501.95   19.80
   7  -4  -2  511.05   20.60
  -7  -4   2  503.45   21.60
   7  -4  -2  548.55   21.60
  -7  -4   2  522.65   21.80
   7  -4  -2  528.75   20.10
  -7  -4   2  527.15   20.90
  -7  -4   2  527.05   22.40
   7   4  -2  519.65   22.80
  -7   4   2  550.84   19.70
   7   4  -2  514.75   23.30
   7   4  -2  522.95   21.70
  -7   4   2  510.75   19.80
  -7   4   2  505.75   17.90
   7   4  -2  527.75   21.40
  -7   4   2  525.05   18.30
  -6  -4   2   70.99    9.60
  -6  -4   2   68.59    9.30
   6  -4  -2   72.69    9.10
   6  -4  -2   75.39    8.30
  -6  -4   2   57.49    9.50
   6  -4  -2   76.99    8.30
   6  -4  -2   76.89    8.90
  -6  -4   2   86.59   10.20
   6   4  -2   81.09   10.00
   6   4  -2   69.69   10.40
   6   4  -2   61.59    9.60
  -6   4   2   75.59    7.10
  -6   4   2   70.49    7.90
   6   4  -2   84.19    9.80
  -6   4   2   75.39    7.30
  -6   4   2   77.69    7.90
   5  -4  -2  154.28   13.30
   5  -4  -2  187.68   12.60
   5  -4  -2  143.79   13.50
  -5  -4   2  175.68   15.60
  -5  -4   2  154.08   15.20
   5  -4  -2  142.29   12.30
  -5  -4   2  145.09   14.60
  -5  -4   2  154.18   15.90
   5   4  -2  135.29   14.90
  -5   4   2  182.18   12.20
  -5   4   2  167.38   11.00
   5   4  -2  181.68   14.80
  -5   4   2  144.69   12.60
   5   4  -2  147.49   15.80
  -5   4   2  169.28   10.90
   5   4  -2  110.89   11.10
  -4  -4   2   81.79    7.70
  -4  -4   2   89.89    8.30
  -4  -4   2   97.59   10.70
   4  -4  -2   91.09    8.50
   4  -4  -2   96.29    8.50
   4  -4  -2   88.69    9.20
   4  -4  -2   90.39    8.80
  -4   4   2   88.09    7.40
   4   4  -2  104.49   10.70
  -4   4   2   94.29    8.50
   4   4  -2  110.39    8.90
  -4   4   2   95.49    7.60
   4   4  -2   98.59   10.70
   4   4  -2  105.09    9.10
  -4   4   2   80.69    8.80
   3  -4  -2  198.48    8.60
  -3  -4   2  199.08    9.60
  -3  -4   2  187.78   10.10
   3  -4  -2  200.78    8.10
  -3  -4   2  194.68    9.40
   3  -4  -2  186.28    8.00
   3  -4  -2  189.68    8.20
  -3  -4   2  187.48    9.70
  -3   4   2  191.98    7.50
  -3   4   2  196.18    8.40
  -3   4   2  194.98    8.20
   3   4  -2  199.48   10.30
   3   4  -2  194.08    9.50
  -3   4   2  197.48    7.50
   3   4  -2  195.38    9.40
   3   4  -2  191.98    9.70
   2  -4  -2   47.30    4.10
  -2  -4   2   48.80    5.10
  -2  -4   2   49.80    4.80
   2  -4  -2   53.19    5.50
  -2  -4   2   39.00    4.70
   2  -4  -2   45.80    4.40
  -2  -4   2   52.69    5.10
  -2   4   2   43.90    4.20
   2   4  -2   52.59    5.40
  -2   4   2   49.99    4.80
   2   4  -2   49.99    4.90
  -2   4   2   48.30    4.40
   2   4  -2   39.20    4.60
  -2   4   2   55.29    4.70
   1  -4  -2 5948.41  145.89
   1  -4  -2 6048.90  145.69
  -1  -4   2 5957.60  145.89
   1  -4  -2 5887.11  145.99
  -1  -4   2 5835.42  145.79
   1   4  -2 5931.71  145.69
   0  -4   2 2448.85   61.39
   0  -4  -2 2460.25   62.49
   0  -4  -2 2374.76   62.99
   0  -4   2 2779.92   61.99
   0  -4  -2 2433.16   62.79
   0  -4  -2 2502.45   63.09
   0  -4   2 2471.25   61.79
   0   4   2 2494.95   62.99
   0   4  -2 2586.24   61.79
   0   4   2 2487.45   62.39
   0   4   2 2402.96   62.59
   1  -4   2  511.55   14.50
  -1  -4  -2  532.65   17.70
  -1  -4  -2  538.35   16.40
  -1  -4  -2  534.05   16.90
  -1  -4  -2  506.75   16.80
   1  -4   2  528.95   14.70
   1   4   2  534.55   16.60
   1   4   2  555.24   17.40
   1   4   2  539.85   16.10
   1   4   2  547.35   17.00
  -1   4  -2  521.55   14.20
  -2  -4  -2  829.12   24.00
   2  -4   2  826.32   21.10
  -2  -4  -2  845.22   24.60
  -2  -4  -2  857.41   24.40
   2  -4   2  769.92   21.60
   2  -4   2  753.52   21.00
   2  -4   2  804.02   22.10
  -2  -4  -2  851.91   23.50
  -2  -4  -2  846.92   23.70
  -2   4  -2  764.62   21.50
   2   4   2  857.21   24.50
  -2   4  -2  763.02   21.40
  -2   4  -2  806.92   21.60
   2   4   2  861.71   23.80
   2   4   2  834.32   23.20
   2   4   2  845.42   23.70
  -3  -4  -2 2495.55   65.89
   3  -4   2 2475.55   63.69
  -3  -4  -2 2567.54   66.49
   3  -4   2 2507.05   63.29
  -3  -4  -2 2605.94   65.29
  -3  -4  -2 2520.25   65.79
  -3  -4  -2 2580.64   65.79
   3  -4   2 2415.06   63.99
   3  -4   2 2501.15   64.29
   3  -4   2 2428.86   63.09
  -3  -4  -2 2617.74   65.29
  -3   4  -2 2441.06   63.39
  -3   4  -2 2526.85   63.79
   3   4   2 2638.74   65.49
   3   4   2 2579.34   66.19
   3   4   2 2534.75   66.19
  -3   4  -2 2469.65   63.49
   3   4   2 2537.75   65.49
   3   4   2 2588.34   65.09
  -4  -4  -2  584.44   22.00
  -4  -4  -2  573.04   21.60
  -4  -4  -2  557.04   23.50
   4  -4   2  549.74   20.50
   4  -4   2  550.84   18.50
  -4  -4  -2  571.04   25.00
  -4  -4  -2  557.84   22.90
  -4  -4  -2  555.14   22.80
   4  -4   2  562.64   18.60
  -4   4  -2  561.74   15.90
  -4   4  -2  566.84   18.80
  -4   4  -2  572.54   19.20
  -4   4  -2  586.34   16.20
  -4   4  -2  567.04   19.00
   4   4   2  564.54   24.20
   4   4   2  568.04   22.50
   4   4   2  556.34   21.40
  -4   4  -2  569.44   20.00
   4   4   2  578.54   22.30
   4   4   2  559.64   24.10
  -5  -4  -2 1741.43   47.50
  -5  -4  -2 1732.93   47.10
  -5  -4  -2 1685.33   47.90
  -5  -4  -2 1661.63   48.20
  -5  -4  -2 1738.13   49.80
   5  -4   2 1634.44   46.40
   5  -4   2 1681.73   46.60
   5  -4   2 1655.13   45.20
  -5  -4  -2 1714.23   48.50
   5  -4   2 1660.63   45.20
  -5   4  -2 1625.34   46.00
  -5   4  -2 1650.93   45.00
  -5   4  -2 1620.44   45.50
   5   4   2 1723.93   47.20
   5   4   2 1708.63   48.90
  -5   4  -2 1722.53   43.50
   5   4   2 1741.43   49.20
   5   4   2 1697.93   47.60
  -5   4  -2 1668.13   45.20
  -5   4  -2 1653.83   43.00
   6  -4   2   22.40    8.10
   6  -4   2   20.10    8.10
  -6  -4  -2   27.60    8.40
  -6  -4  -2   27.90    8.30
  -6  -4  -2   13.30    7.90
   6  -4   2   15.40    7.30
  -6  -4  -2    7.30   10.30
  -6  -4  -2    3.50    8.60
  -6  -4  -2   19.60    9.10
   6  -4   2   22.50    7.00
   6   4   2    7.40    8.50
  -6   4  -2   27.90    7.40
   6   4   2   12.00    8.00
  -6   4  -2   16.30    5.50
  -6   4  -2   18.50    6.60
  -6   4  -2   19.00    7.70
  -6   4  -2   24.00    5.00
   6   4   2   15.80    9.50
  -6   4  -2   24.70    6.70
   6   4   2   12.20    9.10
  -7  -4  -2 1864.31   53.89
  -7  -4  -2 1970.90   55.39
  -7  -4  -2 1922.31   54.69
  -7  -4  -2 1986.60   53.69
   7  -4   2 1864.51   52.39
   7  -4   2 1891.51   52.39
  -7  -4  -2 1933.51   57.29
   7  -4   2 1914.01   53.89
   7  -4   2 1817.02   53.99
  -7  -4  -2 1910.61   55.59
  -7   4  -2 1912.91   52.79
   7   4   2 1903.51   56.49
  -7   4  -2 1854.81   51.99
  -7   4  -2 1893.91   52.19
  -7   4  -2 1936.91   49.70
   7   4   2 1896.31   54.59
   7   4   2 1903.31   56.09
   7   4   2 1901.71   53.99
  -7   4  -2 1990.20   50.19
  -8  -4  -2   42.90   13.00
  -8  -4  -2   13.70   12.10
  -8  -4  -2   45.80   14.30
   8  -4   2   32.40   11.50
   8  -4   2   21.80   11.90
   8  -4   2   26.10    9.50
  -8  -4  -2   27.60   10.50
  -8  -4  -2   40.40   11.40
   8  -4   2   23.50   10.30
  -8  -4  -2   46.90   11.90
   8   4   2   44.40   11.60
  -8   4  -2   32.00   10.50
   8   4   2   29.90   13.40
  -8   4  -2   30.00    9.10
  -8   4  -2   29.20    7.10
  -8   4  -2   26.50    7.90
   8   4   2   37.70   11.90
  -8   4  -2   45.50    9.50
   8   4   2   32.30   12.60
  -9  -4  -2 1955.50   55.89
  -9  -4  -2 1913.81   58.79
   9  -4   2 1877.81   55.99
  -9  -4  -2 1879.61   61.39
  -9  -4  -2 1907.41   56.99
   9  -4   2 1919.31   58.39
  -9  -4  -2 1958.60   59.69
   9  -4   2 1924.71   57.89
[truncated: 1,977,901 more chars]
