# Supplementary material
Source: MDPI journal article supplement (https://www.mdpi.com/2304-6740/9/10/74)
Supplement: s1 [file s1 › Check.cif (10)_mo_IALVB88_0m_aa.cif]

 
data_mo_IALVB88_0m_aa
# start Validation Reply Form
_vrf_PLAT029_mo_IALVB88_0m_aa 
; 
PROBLEM: _diffrn_measured_fraction_theta_full value Low . 0.837 Why? 
RESPONSE: The crystals were found to be weakly diffracting and as a result, 
reflections did not extend out as far in theta as what would normally 
be considered desirable for small molecules.
; 
# end Validation Reply Form 
# start Validation Reply Form
_vrf_PLAT342_mo_IALVB88_0m_aa 
; 
PROBLEM: Low Bond Precision on  C-C Bonds
RESPONSE: The isolated crystals were very thin and diffracted
 weakly at high angles, for this reason the C-C Bonds are low precision  

; 
# end Validation Reply Form 
# start Validation Reply Form
_vrf_PLAT911_mo_IALVB88_0m_aa 
; 
PROBLEM: Missing FCF Refl Between Thmin & STh/L
RESPONSE: Due to the quality of the some reflections below theta min were 
affected by the beamstop, they haven't been taken into account but this 
doesn't affect the refinement
;  
# end Validation Reply Form 
# start Validation Reply Form
_vrf_PLAT250_mo_IALVB88_0m_aa 
; 
PROBLEM: Large U3/U1 Ratio for Average U(i,j) Tensor
RESPONSE: Due to the quality of the crystal there was litle dinamic disordered 
; 
# end Validation Reply Form 
# start Validation Reply Form
_vrf_PLAT220_mo_IALVB88_0m_aa
; 
PROBLEM: NonSolvent   Resd 1  C   Ueq(max)/Ueq(min) Range  
RESPONSE: Due to the quality of thecrystal  there was litle dinamic disordered 
;  
# end Validation Reply Form 
# start Validation Reply Form
_vrf_RINTA01_mo_IALVB88_0m_aa 
; 
PROBLEM: The value of Rint is greater than 0.12
RESPONSE:  The elevated values of _diffrn_reflns_av_R_equivalents is due to 
 the poor crystal diffraction because the crystal was very thin.
 Other attempts of crystallization were done, but no single 
 crystals of better quality were obtained.
; 
# end Validation Reply Form 
# start Validation Reply Form
_vrf_PLAT910_mo_IALVB88_0m_aa 
; 
PROBLEM: Missing # of FCF Reflection(s) Below Theta(Min).
RESPONSE: Due to the poor crystal diffraction because the crystal was very thin.
; 
# end Validation Reply Form 
# start Validation Reply Form
_vrf_PLAT976_mo_IALVB88_0m_aa 
; 
PROBLEM: Check Calcd Resid. Dens.  0.60A   From N1 
RESPONSE: Due to the quality of the crystal 

; 
# end Validation Reply Form 

_audit_creation_method            'SHELXL-2018/3'
_shelx_SHELXL_version_number      '2018/3'
_chemical_name_systematic         ?
_chemical_name_common             ?
_chemical_melting_point           ?
_chemical_formula_moiety          'C40 H24 Eu F12 O8, C5 H6 N'
_chemical_formula_sum
 'C45 H30 Eu F12 N O8' 
_chemical_formula_weight          1092.66

loop_
 _atom_type_symbol
 _atom_type_description
 _atom_type_scat_dispersion_real
 _atom_type_scat_dispersion_imag
 _atom_type_scat_source
 'C'  'C'   0.0033   0.0016
 'International Tables Vol C Tables 4.2.6.8 and 6.1.1.4'
 'H'  'H'   0.0000   0.0000
 'International Tables Vol C Tables 4.2.6.8 and 6.1.1.4'
 'N'  'N'   0.0061   0.0033
 'International Tables Vol C Tables 4.2.6.8 and 6.1.1.4'
 'O'  'O'   0.0106   0.0060
 'International Tables Vol C Tables 4.2.6.8 and 6.1.1.4'
 'F'  'F'   0.0171   0.0103
 'International Tables Vol C Tables 4.2.6.8 and 6.1.1.4'
 'Eu'  'Eu'  -0.1578   3.6682
 'International Tables Vol C Tables 4.2.6.8 and 6.1.1.4'
 
_space_group_crystal_system       monoclinic
_space_group_IT_number            14
_space_group_name_H-M_alt         'P 21/n'
_space_group_name_Hall            '-P 2yn'
 
_shelx_space_group_comment
;
The symmetry employed for this shelxl refinement is uniquely defined
by the following loop, which should always be used as a source of
symmetry information in preference to the above space-group names.
They are only intended as comments.
;
 
loop_
 _space_group_symop_operation_xyz
 'x, y, z'
 '-x+1/2, y+1/2, -z+1/2'
 '-x, -y, -z'
 'x-1/2, -y-1/2, z-1/2'
 
_cell_length_a                    11.1009(6)
_cell_length_b                    21.8025(12)
_cell_length_c                    18.7796(11)
_cell_angle_alpha                 90
_cell_angle_beta                  106.930(3)
_cell_angle_gamma                 90
_cell_volume                      4348.2(4)
_cell_formula_units_Z             4
_cell_measurement_temperature     100(2)
_cell_measurement_reflns_used      4270
_cell_measurement_theta_min        2.93
_cell_measurement_theta_max       23.66
 
_exptl_crystal_description        'prism'
_exptl_crystal_colour             ?
_exptl_crystal_density_meas       ?
_exptl_crystal_density_method     ?
_exptl_crystal_density_diffrn     1.669          
_exptl_crystal_F_000              2168
_exptl_transmission_factor_min    ?
_exptl_transmission_factor_max    ?
_exptl_crystal_size_max           0.295
_exptl_crystal_size_mid           0.079
_exptl_crystal_size_min           0.038
_exptl_absorpt_coefficient_mu     1.549
_shelx_estimated_absorpt_T_min    0.658
_shelx_estimated_absorpt_T_max    0.943
_exptl_absorpt_correction_type    'multi-scan'
_exptl_absorpt_correction_T_min   0.4731  
_exptl_absorpt_correction_T_max   0.7461
_exptl_absorpt_process_details    'sadabs'
_exptl_absorpt_special_details    ?
_diffrn_ambient_temperature       100(2)
_diffrn_radiation_wavelength      0.71073
_diffrn_radiation_type            MoK\a
_diffrn_source                    'microfocus'
_diffrn_measurement_device_type   'D8 Venture'
_diffrn_measurement_method        '\f and \w scans'
_diffrn_detector_area_resol_mean  ?
_diffrn_reflns_number             6112
_diffrn_reflns_av_unetI/netI      0.1296
_diffrn_reflns_av_R_equivalents   0.1366
_diffrn_reflns_limit_h_min        -12
_diffrn_reflns_limit_h_max        12
_diffrn_reflns_limit_k_min        0
_diffrn_reflns_limit_k_max        25
_diffrn_reflns_limit_l_min        0
_diffrn_reflns_limit_l_max        22
_diffrn_reflns_theta_min          2.267
_diffrn_reflns_theta_max          24.999
_diffrn_reflns_theta_full         24.999
_diffrn_measured_fraction_theta_max   0.800
_diffrn_measured_fraction_theta_full  0.800
_diffrn_reflns_Laue_measured_fraction_max    0.800
_diffrn_reflns_Laue_measured_fraction_full   0.800
_diffrn_reflns_point_group_measured_fraction_max   0.800
_diffrn_reflns_point_group_measured_fraction_full  0.800
_reflns_number_total              6112
_reflns_number_gt                 3719
_reflns_threshold_expression      'I > 2\s(I)'
_reflns_Friedel_coverage          0.000
_reflns_Friedel_fraction_max      .
_reflns_Friedel_fraction_full     .
 
_reflns_special_details
;
 _reflns_Friedel_fraction is defined as the number of unique
 Friedel pairs measured divided by the number that would be
 possible theoretically, ignoring centric projections and
 systematic absences.
;
 
_computing_data_collection       'Bruker APEX3'
_computing_cell_refinement       'Bruker SAINT'
_computing_data_reduction        'Bruker SAINT'
_computing_structure_solution     'SHELXT 2014/5 (Sheldrick, 2014)'
_computing_structure_refinement 'SHELXL-2018/3 (Sheldrick, 2018)'
_computing_molecular_graphics    'Bruker SHELXTL'
_computing_publication_material  'Bruker SHELXTL'
_refine_special_details           ?
_refine_ls_structure_factor_coef  Fsqd
_refine_ls_matrix_type            full
_refine_ls_weighting_scheme       calc
_refine_ls_weighting_details
'w=1/[\s^2^(Fo^2^)+(0.0088P)^2^] where P=(Fo^2^+2Fc^2^)/3'
_atom_sites_solution_primary      ?
_atom_sites_solution_secondary    ?
_atom_sites_solution_hydrogens    geom
_refine_ls_hydrogen_treatment     constr
_refine_ls_extinction_method      none
_refine_ls_extinction_coef        .
_refine_ls_number_reflns          6112
_refine_ls_number_parameters      568
_refine_ls_number_restraints      1
_refine_ls_R_factor_all           0.0824
_refine_ls_R_factor_gt            0.0324
_refine_ls_wR_factor_ref          0.0505
_refine_ls_wR_factor_gt           0.0438
_refine_ls_goodness_of_fit_ref    0.832
_refine_ls_restrained_S_all       0.832
_refine_ls_shift/su_max           0.002
_refine_ls_shift/su_mean          0.000
 
loop_
 _atom_site_label
 _atom_site_type_symbol
 _atom_site_fract_x
 _atom_site_fract_y
 _atom_site_fract_z
 _atom_site_U_iso_or_equiv
 _atom_site_adp_type
 _atom_site_occupancy
 _atom_site_site_symmetry_order  
 _atom_site_calc_flag
 _atom_site_refinement_flags_posn
 _atom_site_refinement_flags_adp
 _atom_site_refinement_flags_occupancy
 _atom_site_disorder_assembly
 _atom_site_disorder_group
Eu1 Eu 0.79267(3) 0.68639(2) 0.31433(2) 0.01453(8) Uani 1 1 d . . . . .
F1 F 0.5397(3) 0.52741(12) 0.37689(16) 0.0365(12) Uani 1 1 d . . . . .
F2 F 0.5141(3) 0.59033(13) 0.45909(15) 0.0364(11) Uani 1 1 d . . . . .
F3 F 0.6334(3) 0.51119(13) 0.49270(16) 0.0412(12) Uani 1 1 d . . . . .
F4 F 0.5092(4) 0.59571(16) 0.0894(2) 0.0669(18) Uani 1 1 d . . . . .
F5 F 0.4784(5) 0.5253(2) 0.1601(2) 0.086(2) Uani 1 1 d . . . . .
F6 F 0.5860(3) 0.50718(14) 0.08526(16) 0.0414(12) Uani 1 1 d . . . . .
F7 F 0.7402(4) 0.73388(14) 0.00633(16) 0.0447(13) Uani 1 1 d . . . . .
F8 F 0.9215(4) 0.73578(16) 0.08588(18) 0.0562(14) Uani 1 1 d . . . . .
F9 F 0.8212(4) 0.65107(16) 0.06016(17) 0.0580(15) Uani 1 1 d . . . . .
F10 F 1.0542(4) 0.87410(17) 0.2832(2) 0.0693(16) Uani 1 1 d . . . . .
F11 F 1.1804(3) 0.81502(14) 0.35821(14) 0.0337(10) Uani 1 1 d . . . . .
F12 F 1.1228(4) 0.89492(16) 0.4003(2) 0.0694(16) Uani 1 1 d . . . . .
O1 O 0.6729(3) 0.63594(13) 0.38349(16) 0.0187(11) Uani 1 1 d . . . . .
O2 O 0.9342(3) 0.65858(13) 0.43352(16) 0.0159(11) Uani 1 1 d . . . . .
O3 O 0.6536(3) 0.61134(14) 0.23284(16) 0.0188(11) Uani 1 1 d . . . . .
O4 O 0.9134(3) 0.60216(14) 0.29774(16) 0.0187(12) Uani 1 1 d . . . . .
O5 O 0.8252(3) 0.70422(13) 0.19714(16) 0.0203(11) Uani 1 1 d . . . . .
O6 O 0.6124(3) 0.73853(13) 0.24073(16) 0.0180(11) Uani 1 1 d . . . . .
O7 O 0.9556(3) 0.76131(14) 0.33473(16) 0.0184(11) Uani 1 1 d . . . . .
O8 O 0.7423(3) 0.76664(14) 0.38507(15) 0.0172(11) Uani 1 1 d . . . . .
C1 C 0.6020(7) 0.5550(3) 0.4408(3) 0.028(2) Uani 1 1 d . . . . .
C2 C 0.7082(6) 0.5940(2) 0.4327(3) 0.0173(17) Uani 1 1 d . . . . .
C3 C 0.8266(5) 0.5813(2) 0.4783(3) 0.0202(17) Uani 1 1 d . . . . .
H3 H 0.837321 0.546773 0.510426 0.024 Uiso 1 1 calc R U . . .
C4 C 0.9342(5) 0.6176(2) 0.4799(3) 0.0185(17) Uani 1 1 d . . . . .
C5 C 1.0563(6) 0.6063(2) 0.5393(3) 0.0221(19) Uani 1 1 d . . . . .
C6 C 1.0533(6) 0.5867(2) 0.6109(3) 0.036(2) Uani 1 1 d . . . . .
H6 H 0.975737 0.578765 0.621023 0.043 Uiso 1 1 calc R U . . .
C7 C 1.1679(7) 0.5794(3) 0.6657(3) 0.047(3) Uani 1 1 d . . . . .
H7 H 1.169673 0.566526 0.714282 0.056 Uiso 1 1 calc R U . . .
C8 C 1.2780(7) 0.5908(3) 0.6491(4) 0.046(3) Uani 1 1 d . . . . .
H8 H 1.355347 0.584368 0.686763 0.055 Uiso 1 1 calc R U . . .
C9 C 1.2817(7) 0.6114(2) 0.5797(3) 0.044(3) Uani 1 1 d . . . . .
H9 H 1.359392 0.619670 0.569865 0.053 Uiso 1 1 calc R U . . .
C10 C 1.1668(6) 0.6193(2) 0.5248(3) 0.029(2) Uani 1 1 d . . . . .
H10 H 1.165704 0.633936 0.477015 0.034 Uiso 1 1 calc R U . . .
C11 C 0.5624(7) 0.5488(3) 0.1323(3) 0.035(2) Uani 1 1 d . . . . .
C12 C 0.6796(5) 0.5708(2) 0.1912(3) 0.0158(18) Uani 1 1 d . . . . .
C13 C 0.7923(5) 0.5455(2) 0.1945(3) 0.0149(17) Uani 1 1 d . . . . .
H13 H 0.794515 0.514865 0.158867 0.018 Uiso 1 1 calc R U . . .
C14 C 0.9105(5) 0.5621(2) 0.2491(2) 0.0125(16) Uani 1 1 d . . . . .
C15 C 1.0287(5) 0.5301(2) 0.2516(3) 0.0123(16) Uani 1 1 d . . . . .
C16 C 1.0495(6) 0.4982(2) 0.1914(3) 0.0208(18) Uani 1 1 d . . . . .
H16 H 0.982913 0.493224 0.146694 0.025 Uiso 1 1 calc R U . . .
C17 C 1.1635(6) 0.4748(2) 0.1972(3) 0.028(2) Uani 1 1 d . . . . .
H17 H 1.175375 0.452889 0.156046 0.034 Uiso 1 1 calc R U . . .
C18 C 1.2666(6) 0.4813(2) 0.2616(3) 0.0228(19) Uani 1 1 d . . . . .
H18 H 1.347758 0.466012 0.263801 0.027 Uiso 1 1 calc R U . . .
C19 C 1.2434(6) 0.5114(2) 0.3220(3) 0.0229(19) Uani 1 1 d . . . . .
H19 H 1.309323 0.514977 0.367323 0.027 Uiso 1 1 calc R U . . .
C20 C 1.1278(5) 0.5356(2) 0.3173(3) 0.0196(17) Uani 1 1 d . . . . .
H20 H 1.114676 0.556386 0.358905 0.024 Uiso 1 1 calc R U . . .
C21 C 0.8080(7) 0.7116(3) 0.0715(3) 0.029(2) Uani 1 1 d . . . . .
C22 C 0.7503(6) 0.7202(2) 0.1346(3) 0.0191(13) Uani 1 1 d . . . . .
C23 C 0.6278(6) 0.7402(2) 0.1182(3) 0.0191(13) Uani 1 1 d . . . . .
H23 H 0.583373 0.748345 0.067638 0.023 Uiso 1 1 calc R U . . .
C24 C 0.5655(5) 0.74914(19) 0.1718(3) 0.0119(15) Uani 1 1 d D . . . .
C25 C 0.4312(5) 0.7729(2) 0.1488(3) 0.0155(16) Uani 1 1 d D . . . .
C26 C 0.3513(6) 0.7645(2) 0.0758(3) 0.0210(18) Uani 1 1 d . . . . .
H26 H 0.381371 0.744719 0.039245 0.025 Uiso 1 1 calc R U . . .
C27 C 0.2291(6) 0.7855(2) 0.0583(3) 0.0247(19) Uani 1 1 d . . . . .
H27 H 0.174115 0.779210 0.009597 0.030 Uiso 1 1 calc R U . . .
C28 C 0.1856(6) 0.8155(2) 0.1103(3) 0.0317(19) Uani 1 1 d . . . . .
H28 H 0.101072 0.829719 0.097554 0.038 Uiso 1 1 calc R U . . .
C29 C 0.2658(5) 0.8251(2) 0.1816(3) 0.030(2) Uani 1 1 d . . . . .
H29 H 0.237055 0.847215 0.217096 0.036 Uiso 1 1 calc R U . . .
C30 C 0.3862(6) 0.8025(2) 0.2008(3) 0.0211(17) Uani 1 1 d . . . . .
H30 H 0.439151 0.807344 0.250254 0.025 Uiso 1 1 calc R U . . .
C31 C 1.0797(7) 0.8492(3) 0.3503(4) 0.035(2) Uani 1 1 d . . . . .
C32 C 0.9674(6) 0.8147(3) 0.3601(2) 0.0226(16) Uani 1 1 d . . . . .
C33 C 0.8904(6) 0.8458(2) 0.3927(3) 0.0257(19) Uani 1 1 d . . . . .
H33 H 0.913647 0.886304 0.409680 0.031 Uiso 1 1 calc R U . . .
C34 C 0.7774(5) 0.8212(2) 0.4028(2) 0.0162(15) Uani 1 1 d . . . . .
C35 C 0.6945(6) 0.8579(2) 0.4357(2) 0.0188(17) Uani 1 1 d . . . . .
C36 C 0.7376(6) 0.9109(2) 0.4789(2) 0.0169(17) Uani 1 1 d . . . . .
H36 H 0.820559 0.925840 0.485808 0.020 Uiso 1 1 calc R U . . .
C37 C 0.6562(6) 0.9404(2) 0.5109(3) 0.0244(18) Uani 1 1 d . . . . .
H37 H 0.684004 0.976012 0.540270 0.029 Uiso 1 1 calc R U . . .
C38 C 0.5348(6) 0.9192(2) 0.5010(3) 0.0271(18) Uani 1 1 d . . . . .
H38 H 0.481047 0.939029 0.524966 0.033 Uiso 1 1 calc R U . . .
C39 C 0.4922(6) 0.8685(2) 0.4557(2) 0.0227(18) Uani 1 1 d . . . . .
H39 H 0.407781 0.854832 0.446544 0.027 Uiso 1 1 calc R U . . .
C40 C 0.5720(6) 0.8387(2) 0.4245(3) 0.0163(17) Uani 1 1 d . . . . .
H40 H 0.542478 0.803738 0.394185 0.020 Uiso 1 1 calc R U . . .
N1 N 0.3954(6) 0.66604(19) 0.3143(3) 0.0496(10) Uani 1 1 d . . . . .
H1A H 0.464942 0.667228 0.351718 0.060 Uiso 1 1 calc R U . . .
C41 C 0.3967(7) 0.6446(2) 0.2471(3) 0.0496(10) Uani 1 1 d . . . . .
H41 H 0.473596 0.630492 0.240343 0.060 Uiso 1 1 calc R U . . .
C42 C 0.2958(7) 0.6431(2) 0.1921(4) 0.0496(10) Uani 1 1 d . . . . .
H42 H 0.299863 0.627815 0.145500 0.060 Uiso 1 1 calc R U . . .
C43 C 0.1909(8) 0.6613(2) 0.1983(4) 0.0496(10) Uani 1 1 d . . . . .
H43 H 0.118363 0.657914 0.156443 0.060 Uiso 1 1 calc R U . . .
C44 C 0.1791(7) 0.6833(3) 0.2569(3) 0.0496(10) Uani 1 1 d . . . . .
H44 H 0.097939 0.698473 0.254948 0.060 Uiso 1 1 calc R U . . .
C45 C 0.2701(6) 0.6882(3) 0.3240(3) 0.0496(10) Uani 1 1 d . . . . .
H45 H 0.257610 0.702940 0.368916 0.060 Uiso 1 1 calc R U . . .
 
loop_
 _atom_site_aniso_label
 _atom_site_aniso_U_11
 _atom_site_aniso_U_22
 _atom_site_aniso_U_33
 _atom_site_aniso_U_23
 _atom_site_aniso_U_13
 _atom_site_aniso_U_12
Eu1 0.01122(16) 0.01607(13) 0.01778(12) -0.00146(15) 0.00653(11) 0.00046(17)
F1 0.033(3) 0.034(2) 0.0416(18) -0.0042(16) 0.009(2) -0.0093(17)
F2 0.033(3) 0.040(2) 0.0393(18) 0.0041(16) 0.015(2) -0.0029(18)
F3 0.032(3) 0.037(2) 0.054(2) 0.0152(17) 0.010(2) -0.0055(17)
F4 0.052(4) 0.057(3) 0.071(3) -0.010(2) -0.017(3) 0.009(2)
F5 0.066(5) 0.104(4) 0.090(3) -0.042(3) 0.026(3) -0.036(3)
F6 0.024(3) 0.049(2) 0.048(2) -0.0196(18) 0.004(2) -0.0014(18)
F7 0.043(3) 0.061(2) 0.0327(18) 0.0035(17) 0.016(2) 0.005(2)
F8 0.043(4) 0.082(3) 0.050(2) 0.000(2) 0.023(2) -0.007(2)
F9 0.078(4) 0.050(3) 0.061(2) -0.0036(19) 0.044(2) 0.011(2)
F10 0.029(4) 0.104(3) 0.081(3) 0.051(2) 0.025(3) 0.001(2)
F11 0.019(2) 0.0444(19) 0.0401(16) 0.0036(19) 0.0123(18) -0.004(2)
F12 0.056(4) 0.062(3) 0.104(3) -0.025(2) 0.045(3) -0.015(2)
O1 0.015(3) 0.017(2) 0.0250(18) 0.0020(16) 0.0070(19) 0.0021(17)
O2 0.013(3) 0.0207(19) 0.0164(17) 0.0014(15) 0.0086(18) -0.0052(17)
O3 0.014(3) 0.017(2) 0.0237(18) -0.0064(16) 0.0040(19) 0.0009(18)
O4 0.011(3) 0.025(2) 0.0204(19) -0.0026(17) 0.0050(19) 0.0050(18)
O5 0.013(3) 0.026(2) 0.0258(18) 0.0031(15) 0.0123(19) 0.0025(16)
O6 0.017(3) 0.023(2) 0.0170(18) 0.0019(15) 0.0092(19) 0.0023(17)
O7 0.016(3) 0.020(2) 0.0233(18) -0.0021(16) 0.0117(19) -0.0036(17)
O8 0.018(3) 0.018(2) 0.0158(17) -0.0033(15) 0.0062(19) 0.0002(17)
C1 0.027(5) 0.019(3) 0.039(4) 0.003(3) 0.010(4) 0.002(3)
C2 0.016(4) 0.014(3) 0.022(3) -0.003(2) 0.007(3) -0.001(3)
C3 0.018(4) 0.016(3) 0.029(3) -0.001(2) 0.010(3) -0.005(3)
C4 0.012(4) 0.025(3) 0.018(3) -0.010(2) 0.003(3) 0.000(3)
C5 0.021(5) 0.019(3) 0.024(3) -0.003(2) 0.004(3) -0.001(3)
C6 0.035(6) 0.033(4) 0.039(3) 0.009(3) 0.009(4) 0.000(3)
C7 0.044(6) 0.043(4) 0.042(4) 0.010(3) -0.003(5) 0.003(4)
C8 0.021(6) 0.051(5) 0.058(5) 0.003(4) 0.000(5) 0.010(4)
C9 0.031(6) 0.039(4) 0.058(4) -0.010(3) 0.005(4) 0.004(3)
C10 0.020(5) 0.029(3) 0.035(3) -0.001(3) 0.003(4) -0.002(3)
C11 0.036(6) 0.027(4) 0.037(4) -0.016(3) 0.004(4) -0.003(4)
C12 0.009(5) 0.016(3) 0.022(3) 0.000(2) 0.002(3) -0.003(3)
C13 0.013(4) 0.011(3) 0.018(3) -0.004(2) 0.002(3) 0.004(2)
C14 0.015(4) 0.013(3) 0.012(3) 0.002(2) 0.007(3) 0.002(3)
C15 0.011(4) 0.014(3) 0.014(3) 0.001(2) 0.008(3) 0.006(3)
C16 0.018(5) 0.025(3) 0.017(3) 0.003(2) 0.002(3) 0.003(3)
C17 0.036(6) 0.021(3) 0.028(3) 0.003(3) 0.012(4) 0.000(3)
C18 0.020(5) 0.023(3) 0.028(3) 0.001(3) 0.012(3) 0.006(3)
C19 0.016(5) 0.023(3) 0.028(3) 0.000(3) 0.004(3) 0.001(3)
C20 0.022(5) 0.019(3) 0.020(3) -0.005(2) 0.009(3) 0.003(3)
C21 0.027(6) 0.038(4) 0.031(4) 0.003(3) 0.022(4) -0.002(3)
C22 0.020(3) 0.020(2) 0.022(2) 0.0004(17) 0.015(2) -0.0005(19)
C23 0.020(3) 0.020(2) 0.022(2) 0.0004(17) 0.015(2) -0.0005(19)
C24 0.011(4) 0.010(3) 0.019(3) -0.001(2) 0.011(3) -0.002(2)
C25 0.017(4) 0.014(3) 0.019(3) 0.002(2) 0.009(3) 0.002(3)
C26 0.026(5) 0.020(3) 0.017(3) 0.003(2) 0.006(3) 0.005(3)
C27 0.021(5) 0.028(3) 0.022(3) 0.000(3) 0.001(3) 0.003(3)
C28 0.031(5) 0.023(3) 0.037(3) 0.003(3) 0.004(3) 0.003(3)
C29 0.026(5) 0.021(4) 0.040(3) 0.000(3) 0.008(4) 0.003(3)
C30 0.022(4) 0.021(3) 0.022(3) 0.000(2) 0.010(3) 0.004(3)
C31 0.026(6) 0.028(4) 0.054(4) -0.007(3) 0.016(4) 0.002(3)
C32 0.018(4) 0.027(3) 0.025(3) -0.005(3) 0.010(3) -0.001(4)
C33 0.030(5) 0.017(3) 0.031(3) -0.001(2) 0.011(3) -0.004(3)
C34 0.011(4) 0.024(3) 0.013(2) 0.005(2) 0.002(3) 0.005(3)
C35 0.023(5) 0.019(3) 0.010(3) 0.004(2) -0.001(3) 0.006(3)
C36 0.017(4) 0.012(3) 0.021(3) -0.001(2) 0.005(3) 0.003(3)
C37 0.023(5) 0.029(3) 0.024(3) -0.005(3) 0.011(3) 0.005(3)
C38 0.030(5) 0.026(3) 0.034(3) -0.001(3) 0.023(3) 0.009(3)
C39 0.018(4) 0.027(3) 0.021(3) 0.001(3) 0.003(3) -0.004(3)
C40 0.018(5) 0.017(3) 0.020(3) 0.000(2) 0.014(3) 0.001(3)
N1 0.056(3) 0.0325(15) 0.0674(17) 0.0036(14) 0.029(2) -0.0015(15)
C41 0.056(3) 0.0325(15) 0.0674(17) 0.0036(14) 0.029(2) -0.0015(15)
C42 0.056(3) 0.0325(15) 0.0674(17) 0.0036(14) 0.029(2) -0.0015(15)
C43 0.056(3) 0.0325(15) 0.0674(17) 0.0036(14) 0.029(2) -0.0015(15)
C44 0.056(3) 0.0325(15) 0.0674(17) 0.0036(14) 0.029(2) -0.0015(15)
C45 0.056(3) 0.0325(15) 0.0674(17) 0.0036(14) 0.029(2) -0.0015(15)
 
_geom_special_details
;
 All esds (except the esd in the dihedral angle between two l.s. planes)
 are estimated using the full covariance matrix.  The cell esds are taken
 into account individually in the estimation of esds in distances, angles
 and torsion angles; correlations between esds in cell parameters are only
 used when they are defined by crystal symmetry.  An approximate (isotropic)
 treatment of cell esds is used for estimating esds involving l.s. planes.
;
 
loop_
 _geom_bond_atom_site_label_1
 _geom_bond_atom_site_label_2
 _geom_bond_distance
 _geom_bond_site_symmetry_2
 _geom_bond_publ_flag
Eu1 O4 2.347(3) . ?
Eu1 O8 2.360(3) . ?
Eu1 O5 2.364(4) . ?
Eu1 O6 2.366(3) . ?
Eu1 O1 2.381(4) . ?
Eu1 O7 2.384(3) . ?
Eu1 O2 2.408(3) . ?
Eu1 O3 2.455(3) . ?
F1 C1 1.341(5) . ?
F2 C1 1.363(8) . ?
F3 C1 1.337(5) . ?
F4 C11 1.329(6) . ?
F5 C11 1.299(9) . ?
F6 C11 1.344(7) . ?
F7 C21 1.329(6) . ?
F8 C21 1.318(8) . ?
F9 C21 1.353(6) . ?
F10 C31 1.324(7) . ?
F11 C31 1.315(7) . ?
F12 C31 1.359(6) . ?
O1 C2 1.278(5) . ?
O2 C4 1.248(5) . ?
O3 C12 1.268(6) . ?
O4 C14 1.258(5) . ?
O5 C22 1.275(5) . ?
O6 C24 1.267(5) . ?
O7 C32 1.249(6) . ?
O8 C34 1.267(5) . ?
C1 C2 1.496(9) . ?
C2 C3 1.371(6) . ?
C3 C4 1.426(8) . ?
C3 H3 0.9500 . ?
C4 C5 1.504(6) . ?
C5 C10 1.361(9) . ?
C5 C6 1.420(8) . ?
C6 C7 1.393(7) . ?
C6 H6 0.9500 . ?
C7 C8 1.368(11) . ?
C7 H7 0.9500 . ?
C8 C9 1.392(9) . ?
C8 H8 0.9500 . ?
C9 C10 1.398(7) . ?
C9 H9 0.9500 . ?
C10 H10 0.9500 . ?
C11 C12 1.519(7) . ?
C12 C13 1.353(8) . ?
C13 C14 1.456(6) . ?
C13 H13 0.9500 . ?
C14 C15 1.475(8) . ?
C15 C20 1.399(6) . ?
C15 C16 1.401(7) . ?
C16 C17 1.339(8) . ?
C16 H16 0.9500 . ?
C17 C18 1.409(6) . ?
C17 H17 0.9500 . ?
C18 C19 1.398(7) . ?
C18 H18 0.9500 . ?
C19 C20 1.367(8) . ?
C19 H19 0.9500 . ?
C20 H20 0.9500 . ?
C21 C22 1.513(10) . ?
C22 C23 1.375(9) . ?
C23 C24 1.392(8) . ?
C23 H23 0.9500 . ?
C24 C25 1.517(6) . ?
C25 C30 1.380(8) . ?
C25 C26 1.410(5) . ?
C26 C27 1.378(9) . ?
C26 H26 0.9500 . ?
C27 C28 1.374(8) . ?
C27 H27 0.9500 . ?
C28 C29 1.392(5) . ?
C28 H28 0.9500 . ?
C29 C30 1.370(8) . ?
C29 H29 0.9500 . ?
C30 H30 0.9500 . ?
C31 C32 1.512(10) . ?
C32 C33 1.368(9) . ?
C33 C34 1.426(9) . ?
C33 H33 0.9500 . ?
C34 C35 1.483(8) . ?
C35 C40 1.379(8) . ?
C35 C36 1.413(6) . ?
C36 C37 1.381(8) . ?
C36 H36 0.9500 . ?
C37 C38 1.386(9) . ?
C37 H37 0.9500 . ?
C38 C39 1.389(6) . ?
C38 H38 0.9500 . ?
C39 C40 1.362(8) . ?
C39 H39 0.9500 . ?
C40 H40 0.9500 . ?
N1 C41 1.350(8) . ?
N1 C45 1.533(9) . ?
N1 H1A 0.8800 . ?
C41 C42 1.284(7) . ?
C41 H41 0.9500 . ?
C42 C43 1.267(11) . ?
C42 H42 0.9500 . ?
C43 C44 1.242(9) . ?
C43 H43 0.9500 . ?
C44 C45 1.371(6) . ?
C44 H44 0.9500 . ?
C45 H45 0.9500 . ?
 
loop_
 _geom_angle_atom_site_label_1
 _geom_angle_atom_site_label_2
 _geom_angle_atom_site_label_3
 _geom_angle
 _geom_angle_site_symmetry_1
 _geom_angle_site_symmetry_3
 _geom_angle_publ_flag
O4 Eu1 O8 153.22(9) . . ?
O4 Eu1 O5 75.95(11) . . ?
O8 Eu1 O5 121.84(10) . . ?
O4 Eu1 O6 135.81(10) . . ?
O8 Eu1 O6 70.97(10) . . ?
O5 Eu1 O6 73.12(12) . . ?
O4 Eu1 O1 98.17(13) . . ?
O8 Eu1 O1 76.94(12) . . ?
O5 Eu1 O1 147.63(10) . . ?
O6 Eu1 O1 91.65(12) . . ?
O4 Eu1 O7 96.98(13) . . ?
O8 Eu1 O7 72.23(13) . . ?
O5 Eu1 O7 73.89(11) . . ?
O6 Eu1 O7 103.76(11) . . ?
O1 Eu1 O7 138.33(10) . . ?
O4 Eu1 O2 71.53(11) . . ?
O8 Eu1 O2 82.00(10) . . ?
O5 Eu1 O2 132.21(13) . . ?
O6 Eu1 O2 151.16(12) . . ?
O1 Eu1 O2 72.14(12) . . ?
O7 Eu1 O2 76.36(10) . . ?
O4 Eu1 O3 71.06(11) . . ?
O8 Eu1 O3 129.49(13) . . ?
O5 Eu1 O3 76.58(12) . . ?
O6 Eu1 O3 71.62(10) . . ?
O1 Eu1 O3 71.49(11) . . ?
O7 Eu1 O3 150.09(12) . . ?
O2 Eu1 O3 122.22(10) . . ?
C2 O1 Eu1 128.5(4) . . ?
C4 O2 Eu1 134.2(3) . . ?
C12 O3 Eu1 129.4(4) . . ?
C14 O4 Eu1 138.2(3) . . ?
C22 O5 Eu1 131.9(4) . . ?
C24 O6 Eu1 135.2(3) . . ?
C32 O7 Eu1 133.6(4) . . ?
C34 O8 Eu1 137.7(4) . . ?
F3 C1 F1 106.8(4) . . ?
F3 C1 F2 105.9(6) . . ?
F1 C1 F2 105.0(5) . . ?
F3 C1 C2 115.7(5) . . ?
F1 C1 C2 112.3(5) . . ?
F2 C1 C2 110.4(5) . . ?
O1 C2 C3 129.2(5) . . ?
O1 C2 C1 113.3(4) . . ?
C3 C2 C1 117.5(5) . . ?
C2 C3 C4 123.1(5) . . ?
C2 C3 H3 118.5 . . ?
C4 C3 H3 118.5 . . ?
O2 C4 C3 123.6(4) . . ?
O2 C4 C5 116.9(5) . . ?
C3 C4 C5 119.5(5) . . ?
C10 C5 C6 121.5(5) . . ?
C10 C5 C4 119.2(5) . . ?
C6 C5 C4 119.2(7) . . ?
C7 C6 C5 117.7(7) . . ?
C7 C6 H6 121.1 . . ?
C5 C6 H6 121.1 . . ?
C8 C7 C6 119.7(7) . . ?
C8 C7 H7 120.1 . . ?
C6 C7 H7 120.1 . . ?
C7 C8 C9 122.9(6) . . ?
C7 C8 H8 118.5 . . ?
C9 C8 H8 118.5 . . ?
C8 C9 C10 117.4(8) . . ?
C8 C9 H9 121.3 . . ?
C10 C9 H9 121.3 . . ?
C5 C10 C9 120.6(6) . . ?
C5 C10 H10 119.7 . . ?
C9 C10 H10 119.7 . . ?
F5 C11 F4 107.6(7) . . ?
F5 C11 F6 107.3(5) . . ?
F4 C11 F6 105.0(5) . . ?
F5 C11 C12 113.2(6) . . ?
F4 C11 C12 109.5(5) . . ?
F6 C11 C12 113.7(6) . . ?
O3 C12 C13 129.0(4) . . ?
O3 C12 C11 111.7(5) . . ?
C13 C12 C11 119.3(5) . . ?
C12 C13 C14 124.3(5) . . ?
C12 C13 H13 117.9 . . ?
C14 C13 H13 117.9 . . ?
O4 C14 C13 120.7(5) . . ?
O4 C14 C15 118.1(4) . . ?
C13 C14 C15 121.1(4) . . ?
C20 C15 C16 118.9(5) . . ?
C20 C15 C14 116.8(5) . . ?
C16 C15 C14 124.2(4) . . ?
C17 C16 C15 119.8(5) . . ?
C17 C16 H16 120.1 . . ?
C15 C16 H16 120.1 . . ?
C16 C17 C18 122.9(6) . . ?
C16 C17 H17 118.5 . . ?
C18 C17 H17 118.5 . . ?
C19 C18 C17 116.6(6) . . ?
C19 C18 H18 121.7 . . ?
C17 C18 H18 121.7 . . ?
C20 C19 C18 121.3(5) . . ?
C20 C19 H19 119.3 . . ?
C18 C19 H19 119.3 . . ?
C19 C20 C15 120.4(5) . . ?
C19 C20 H20 119.8 . . ?
C15 C20 H20 119.8 . . ?
F8 C21 F7 107.1(6) . . ?
F8 C21 F9 106.3(7) . . ?
F7 C21 F9 105.6(5) . . ?
F8 C21 C22 112.8(5) . . ?
F7 C21 C22 114.9(6) . . ?
F9 C21 C22 109.6(5) . . ?
O5 C22 C23 129.1(6) . . ?
O5 C22 C21 112.1(6) . . ?
C23 C22 C21 118.7(5) . . ?
C22 C23 C24 123.3(5) . . ?
C22 C23 H23 118.3 . . ?
C24 C23 H23 118.3 . . ?
O6 C24 C23 124.8(5) . . ?
O6 C24 C25 115.5(5) . . ?
C23 C24 C25 119.7(4) . . ?
C30 C25 C26 119.5(5) . . ?
C30 C25 C24 119.1(4) . . ?
C26 C25 C24 121.4(5) . . ?
C27 C26 C25 119.1(6) . . ?
C27 C26 H26 120.5 . . ?
C25 C26 H26 120.5 . . ?
C28 C27 C26 120.9(5) . . ?
C28 C27 H27 119.5 . . ?
C26 C27 H27 119.5 . . ?
C27 C28 C29 119.8(6) . . ?
C27 C28 H28 120.1 . . ?
C29 C28 H28 120.1 . . ?
C30 C29 C28 120.0(6) . . ?
C30 C29 H29 120.0 . . ?
C28 C29 H29 120.0 . . ?
C29 C30 C25 120.6(5) . . ?
C29 C30 H30 119.7 . . ?
C25 C30 H30 119.7 . . ?
F11 C31 F10 106.2(7) . . ?
F11 C31 F12 102.7(5) . . ?
F10 C31 F12 106.9(5) . . ?
F11 C31 C32 114.1(5) . . ?
F10 C31 C32 111.4(5) . . ?
F12 C31 C32 114.7(6) . . ?
O7 C32 C33 128.5(6) . . ?
O7 C32 C31 114.6(6) . . ?
C33 C32 C31 116.9(6) . . ?
C32 C33 C34 124.2(6) . . ?
C32 C33 H33 117.9 . . ?
C34 C33 H33 117.9 . . ?
O8 C34 C33 122.2(6) . . ?
O8 C34 C35 115.8(6) . . ?
C33 C34 C35 122.1(5) . . ?
C40 C35 C36 119.4(6) . . ?
C40 C35 C34 118.5(5) . . ?
C36 C35 C34 122.2(6) . . ?
C37 C36 C35 118.4(6) . . ?
C37 C36 H36 120.8 . . ?
C35 C36 H36 120.8 . . ?
C36 C37 C38 121.3(5) . . ?
C36 C37 H37 119.4 . . ?
C38 C37 H37 119.4 . . ?
C37 C38 C39 119.5(6) . . ?
C37 C38 H38 120.3 . . ?
C39 C38 H38 120.3 . . ?
C40 C39 C38 119.7(6) . . ?
C40 C39 H39 120.2 . . ?
C38 C39 H39 120.2 . . ?
C39 C40 C35 121.7(5) . . ?
C39 C40 H40 119.2 . . ?
C35 C40 H40 119.2 . . ?
C41 N1 C45 118.5(6) . . ?
C41 N1 H1A 120.7 . . ?
C45 N1 H1A 120.7 . . ?
C42 C41 N1 121.1(8) . . ?
C42 C41 H41 119.5 . . ?
N1 C41 H41 119.5 . . ?
C43 C42 C41 121.9(8) . . ?
C43 C42 H42 119.1 . . ?
C41 C42 H42 119.1 . . ?
C44 C43 C42 122.6(8) . . ?
C44 C43 H43 118.7 . . ?
C42 C43 H43 118.7 . . ?
C43 C44 C45 127.2(8) . . ?
C43 C44 H44 116.4 . . ?
C45 C44 H44 116.4 . . ?
C44 C45 N1 108.5(5) . . ?
C44 C45 H45 125.7 . . ?
N1 C45 H45 125.7 . . ?
 
_refine_diff_density_max    1.069
_refine_diff_density_min   -0.807
_refine_diff_density_rms    0.084

_shelx_res_file
;
TITL mo_IALVB88_0m_a.res in P2(1)/n
    mo_ialvb88_0m_aa.res
    created by SHELXL-2018/3 at 12:26:33 on 20-Sep-2021
REM Old TITL mo_IALVB88_0m in P2(1)/n
REM SHELXT solution in P2(1)/n
REM R1 0.166,  Rweak 0.029,  Alpha 0.065,  Orientation as input
REM Formula found by SHELXT:  C47 O19 Eu
CELL  0.71073  11.1009  21.8025  18.7796   90.000  106.930   90.000
ZERR    4.000   0.0006   0.0012   0.0011    0.000    0.003    0.000
LATT  1
SYMM 1/2-X, 1/2+Y, 1/2-Z
SFAC C H N O F EU
UNIT 180 120 4 32 48 4
LIST 6 ! automatically inserted. Change 6 to 4 for CHECKCIF!!
TEMP -173.150
SIZE 0.038 0.079 0.295
L.S. 10
MERG 0
ACTA
OMIT    -2.00  50.00
BOND $H
OMIT      0   2   1
FMAP 2
PLAN 20
WGHT    0.008800
FVAR       9.98885
EU1   6    0.792673    0.686387    0.314333    11.00000    0.01122    0.01607 =
         0.01778   -0.00146    0.00653    0.00046
F1    5    0.539709    0.527410    0.376892    11.00000    0.03278    0.03409 =
         0.04160   -0.00425    0.00920   -0.00925
F2    5    0.514073    0.590325    0.459094    11.00000    0.03250    0.04019 =
         0.03929    0.00408    0.01465   -0.00292
F3    5    0.633442    0.511186    0.492698    11.00000    0.03198    0.03652 =
         0.05369    0.01522    0.01012   -0.00552
F4    5    0.509160    0.595705    0.089442    11.00000    0.05165    0.05665 =
         0.07055   -0.01001   -0.01672    0.00854
F5    5    0.478411    0.525275    0.160098    11.00000    0.06569    0.10396 =
         0.08997   -0.04226    0.02593   -0.03634
F6    5    0.586035    0.507182    0.085262    11.00000    0.02362    0.04891 =
         0.04768   -0.01957    0.00434   -0.00138
F7    5    0.740161    0.733880    0.006334    11.00000    0.04330    0.06114 =
         0.03272    0.00346    0.01578    0.00478
F8    5    0.921476    0.735779    0.085876    11.00000    0.04283    0.08157 =
         0.05013   -0.00031    0.02276   -0.00682
F9    5    0.821220    0.651070    0.060161    11.00000    0.07823    0.04973 =
         0.06122   -0.00356    0.04419    0.01148
F10   5    1.054232    0.874105    0.283239    11.00000    0.02920    0.10386 =
         0.08063    0.05122    0.02516    0.00102
F11   5    1.180436    0.815025    0.358206    11.00000    0.01902    0.04436 =
         0.04014    0.00360    0.01227   -0.00355
F12   5    1.122843    0.894919    0.400341    11.00000    0.05573    0.06192 =
         0.10411   -0.02461    0.04455   -0.01534
O1    4    0.672899    0.635941    0.383485    11.00000    0.01461    0.01721 =
         0.02501    0.00199    0.00701    0.00206
O2    4    0.934161    0.658576    0.433518    11.00000    0.01343    0.02067 =
         0.01640    0.00144    0.00860   -0.00518
O3    4    0.653622    0.611336    0.232842    11.00000    0.01446    0.01715 =
         0.02366   -0.00638    0.00398    0.00088
O4    4    0.913393    0.602159    0.297739    11.00000    0.01093    0.02489 =
         0.02044   -0.00259    0.00496    0.00499
O5    4    0.825171    0.704216    0.197141    11.00000    0.01339    0.02585 =
         0.02582    0.00313    0.01225    0.00250
O6    4    0.612362    0.738528    0.240728    11.00000    0.01657    0.02317 =
         0.01698    0.00189    0.00920    0.00229
O7    4    0.955624    0.761307    0.334728    11.00000    0.01579    0.02005 =
         0.02333   -0.00213    0.01175   -0.00360
O8    4    0.742291    0.766639    0.385072    11.00000    0.01815    0.01847 =
         0.01581   -0.00332    0.00618    0.00023
C1    1    0.602034    0.555026    0.440817    11.00000    0.02671    0.01941 =
         0.03875    0.00317    0.01009    0.00186
C2    1    0.708237    0.593960    0.432674    11.00000    0.01637    0.01422 =
         0.02227   -0.00346    0.00708   -0.00077
C3    1    0.826560    0.581308    0.478334    11.00000    0.01795    0.01592 =
         0.02891   -0.00124    0.01041   -0.00499
AFIX  43
H3    2    0.837321    0.546773    0.510426    11.00000   -1.20000
AFIX   0
C4    1    0.934215    0.617579    0.479887    11.00000    0.01199    0.02478 =
         0.01786   -0.00955    0.00293   -0.00011
C5    1    1.056265    0.606298    0.539321    11.00000    0.02132    0.01930 =
         0.02390   -0.00338    0.00386   -0.00124
C6    1    1.053266    0.586662    0.610856    11.00000    0.03522    0.03255 =
         0.03854    0.00860    0.00947    0.00012
AFIX  43
H6    2    0.975737    0.578765    0.621023    11.00000   -1.20000
AFIX   0
C7    1    1.167933    0.579368    0.665653    11.00000    0.04419    0.04322 =
         0.04239    0.00984   -0.00340    0.00350
AFIX  43
H7    2    1.169673    0.566526    0.714282    11.00000   -1.20000
AFIX   0
C8    1    1.278017    0.590777    0.649134    11.00000    0.02067    0.05139 =
         0.05761    0.00326    0.00034    0.01004
AFIX  43
H8    2    1.355347    0.584368    0.686763    11.00000   -1.20000
AFIX   0
C9    1    1.281720    0.611352    0.579658    11.00000    0.03094    0.03907 =
         0.05786   -0.01050    0.00453    0.00404
AFIX  43
H9    2    1.359392    0.619670    0.569865    11.00000   -1.20000
AFIX   0
C10   1    1.166751    0.619308    0.524842    11.00000    0.01977    0.02871 =
         0.03483   -0.00128    0.00348   -0.00196
AFIX  43
H10   2    1.165704    0.633936    0.477015    11.00000   -1.20000
AFIX   0
C11   1    0.562403    0.548790    0.132292    11.00000    0.03588    0.02726 =
         0.03713   -0.01588    0.00374   -0.00342
C12   1    0.679576    0.570797    0.191166    11.00000    0.00890    0.01561 =
         0.02158   -0.00019    0.00218   -0.00288
C13   1    0.792314    0.545467    0.194477    11.00000    0.01325    0.01133 =
         0.01826   -0.00427    0.00181    0.00370
AFIX  43
H13   2    0.794515    0.514865    0.158867    11.00000   -1.20000
AFIX   0
C14   1    0.910518    0.562056    0.249074    11.00000    0.01466    0.01330 =
         0.01186    0.00221    0.00749    0.00236
C15   1    1.028744    0.530098    0.251554    11.00000    0.01113    0.01439 =
         0.01399    0.00142    0.00773    0.00587
C16   1    1.049510    0.498225    0.191429    11.00000    0.01829    0.02523 =
         0.01667    0.00265    0.00179    0.00268
AFIX  43
H16   2    0.982913    0.493224    0.146694    11.00000   -1.20000
AFIX   0
C17   1    1.163492    0.474825    0.197189    11.00000    0.03644    0.02072 =
         0.02829    0.00316    0.01183   -0.00008
AFIX  43
H17   2    1.175375    0.452889    0.156046    11.00000   -1.20000
AFIX   0
C18   1    1.266605    0.481297    0.261583    11.00000    0.02023    0.02309 =
         0.02846    0.00091    0.01224    0.00595
AFIX  43
H18   2    1.347758    0.466012    0.263801    11.00000   -1.20000
AFIX   0
C19   1    1.243403    0.511356    0.322039    11.00000    0.01583    0.02307 =
         0.02839   -0.00014    0.00431    0.00135
AFIX  43
H19   2    1.309323    0.514977    0.367323    11.00000   -1.20000
AFIX   0
C20   1    1.127826    0.535634    0.317313    11.00000    0.02176    0.01906 =
         0.02006   -0.00467    0.00916    0.00258
AFIX  43
H20   2    1.114676    0.556386    0.358905    11.00000   -1.20000
AFIX   0
C21   1    0.808017    0.711639    0.071548    11.00000    0.02668    0.03842 =
         0.03147    0.00260    0.02217   -0.00169
EADP c22 c23
C22   1    0.750298    0.720229    0.134575    11.00000    0.01993    0.02037 =
         0.02240    0.00036    0.01465   -0.00050
C23   1    0.627773    0.740214    0.118171    11.00000    0.01993    0.02037 =
         0.02240    0.00036    0.01465   -0.00050
AFIX  43
H23   2    0.583373    0.748345    0.067638    11.00000   -1.20000
AFIX   0
DFIX 1.5 0.01 c24 c25
C24   1    0.565485    0.749137    0.171834    11.00000    0.01090    0.00951 =
         0.01922   -0.00050    0.01067   -0.00234
C25   1    0.431184    0.772858    0.148779    11.00000    0.01675    0.01361 =
         0.01870    0.00179    0.00937    0.00180
C26   1    0.351328    0.764530    0.075803    11.00000    0.02584    0.01974 =
         0.01716    0.00306    0.00568    0.00537
AFIX  43
H26   2    0.381371    0.744719    0.039245    11.00000   -1.20000
AFIX   0
C27   1    0.229075    0.785546    0.058287    11.00000    0.02127    0.02780 =
         0.02166   -0.00022    0.00118    0.00331
AFIX  43
H27   2    0.174115    0.779210    0.009597    11.00000   -1.20000
AFIX   0
C28   1    0.185595    0.815537    0.110278    11.00000    0.03129    0.02268 =
         0.03718    0.00345    0.00369    0.00346
AFIX  43
H28   2    0.101072    0.829719    0.097554    11.00000   -1.20000
AFIX   0
C29   1    0.265798    0.825063    0.181628    11.00000    0.02636    0.02143 =
         0.04024    0.00008    0.00837    0.00286
AFIX  43
H29   2    0.237055    0.847215    0.217096    11.00000   -1.20000
AFIX   0
C30   1    0.386177    0.802518    0.200760    11.00000    0.02250    0.02059 =
         0.02229   -0.00015    0.00987    0.00352
AFIX  43
H30   2    0.439151    0.807344    0.250254    11.00000   -1.20000
AFIX   0
C31   1    1.079717    0.849153    0.350279    11.00000    0.02583    0.02847 =
         0.05374   -0.00692    0.01612    0.00212
C32   1    0.967416    0.814655    0.360050    11.00000    0.01786    0.02675 =
         0.02543   -0.00479    0.00961   -0.00074
C33   1    0.890375    0.845750    0.392670    11.00000    0.02990    0.01742 =
         0.03095   -0.00108    0.01070   -0.00447
AFIX  43
H33   2    0.913647    0.886304    0.409680    11.00000   -1.20000
AFIX   0
C34   1    0.777420    0.821242    0.402792    11.00000    0.01063    0.02415 =
         0.01318    0.00508    0.00234    0.00517
C35   1    0.694469    0.857872    0.435736    11.00000    0.02305    0.01928 =
         0.01027    0.00408   -0.00098    0.00624
C36   1    0.737570    0.910877    0.478926    11.00000    0.01732    0.01196 =
         0.02085   -0.00094    0.00475    0.00275
AFIX  43
H36   2    0.820559    0.925840    0.485808    11.00000   -1.20000
AFIX   0
C37   1    0.656194    0.940420    0.510903    11.00000    0.02266    0.02868 =
         0.02431   -0.00516    0.01054    0.00471
AFIX  43
H37   2    0.684004    0.976012    0.540270    11.00000   -1.20000
AFIX   0
C38   1    0.534755    0.919153    0.500983    11.00000    0.03020    0.02630 =
         0.03352   -0.00104    0.02294    0.00919
AFIX  43
H38   2    0.481047    0.939029    0.524966    11.00000   -1.20000
AFIX   0
C39   1    0.492161    0.868539    0.455692    11.00000    0.01782    0.02695 =
         0.02124    0.00053    0.00259   -0.00430
AFIX  43
H39   2    0.407781    0.854832    0.446544    11.00000   -1.20000
AFIX   0
C40   1    0.571951    0.838676    0.424479    11.00000    0.01778    0.01696 =
         0.01984   -0.00046    0.01435    0.00132
AFIX  43
H40   2    0.542478    0.803738    0.394185    11.00000   -1.20000
AFIX   0
EADP n1 > c45
N1    3    0.395414    0.666042    0.314295    11.00000    0.05565    0.03253 =
         0.06740    0.00362    0.02856   -0.00153
AFIX  43
H1A   2    0.464942    0.667228    0.351718    11.00000   -1.20000
AFIX   0
C41   1    0.396716    0.644635    0.247092    11.00000    0.05565    0.03253 =
         0.06740    0.00362    0.02856   -0.00153
AFIX  43
H41   2    0.473596    0.630492    0.240343    11.00000   -1.20000
AFIX   0
C42   1    0.295780    0.643064    0.192129    11.00000    0.05565    0.03253 =
         0.06740    0.00362    0.02856   -0.00153
AFIX  43
H42   2    0.299863    0.627815    0.145500    11.00000   -1.20000
AFIX   0
C43   1    0.190870    0.661271    0.198295    11.00000    0.05565    0.03253 =
         0.06740    0.00362    0.02856   -0.00153
AFIX  43
H43   2    0.118363    0.657914    0.156443    11.00000   -1.20000
AFIX   0
C44   1    0.179064    0.683326    0.256862    11.00000    0.05565    0.03253 =
         0.06740    0.00362    0.02856   -0.00153
AFIX  43
H44   2    0.097939    0.698473    0.254948    11.00000   -1.20000
AFIX   0
C45   1    0.270092    0.688243    0.323968    11.00000    0.05565    0.03253 =
         0.06740    0.00362    0.02856   -0.00153
AFIX  43
H45   2    0.257610    0.702940    0.368916    11.00000   -1.20000
AFIX   0
HKLF 4


REM  mo_IALVB88_0m_a.res in P2(1)/n
REM wR2 = 0.0505, GooF = S = 0.832, Restrained GooF = 0.832 for all data
REM R1 = 0.0324 for 3719 Fo > 4sig(Fo) and 0.0824 for all 6112 data
REM 568 parameters refined using 1 restraints

END

WGHT      0.0113      0.0000

REM Highest difference peak  1.069,  deepest hole -0.807,  1-sigma level  0.084
Q1    1   0.3448  0.6848  0.3464  11.00000  0.05    0.79
Q2    1   0.1941  0.6904  0.3137  11.00000  0.05    0.60
Q3    1   0.1530  0.6717  0.2356  11.00000  0.05    0.47
Q4    1   1.0612  0.9145  0.3383  11.00000  0.05    0.43
Q5    1   0.4860  0.7516  0.1667  11.00000  0.05    0.31
Q6    1   0.6097  0.4813  0.1401  11.00000  0.05    0.30
Q7    1   1.2419  0.4649  0.2444  11.00000  0.05    0.29
Q8    1   0.2142  0.6512  0.1849  11.00000  0.05    0.29
Q9    1   0.8390  0.6750  0.3161  11.00000  0.05    0.29
Q10   1   0.5887  0.8255  0.5188  11.00000  0.05    0.28
Q11   1   0.4854  0.7889  0.3412  11.00000  0.05    0.28
Q12   1   0.0949  0.6900  0.0771  11.00000  0.05    0.28
Q13   1   0.3877  0.6399  0.3571  11.00000  0.05    0.27
Q14   1   0.3124  0.9145  0.4717  11.00000  0.05    0.27
Q15   1   0.2918  0.5957  0.2461  11.00000  0.05    0.27
Q16   1   1.0331  0.8115  0.3584  11.00000  0.05    0.27
Q17   1   0.7150  0.6159  0.3987  11.00000  0.05    0.27
Q18   1   1.3426  0.5423  0.2621  11.00000  0.05    0.27
Q19   1   0.6365  0.7032  0.0884  11.00000  0.05    0.27
Q20   1   0.5435  0.5009  0.0755  11.00000  0.05    0.27
;
_shelx_res_checksum   52247

_shelx_hkl_file
;
  14   0   0  127068  117131
  13   1   0  -46892   87948
  14   1   0  -15785   82304
  15   1   0   83073  102728
   1   2   0 5983012  132829
  12   2   0  341060   75069
  13   2   0  237393   93986
  14   2   0  231433  115520
  15   2   0  208466  104009
   1   3   0  724314   13446
   2   3   0 3559058   36276
   3   3   0  876069   33610
  10   3   0   24347   42464
  11   3   0   18190   57760
  12   3   0   77597   68025
  13   3   0   49458   90364
  14   3   0   33099  110490
  15   3   0  493941  267871
   0   4   0  202641   26967
   1   4   0 6438516   49935
   2   4   0    7835   10833
   3   4   0 4383480   44980
   5   4   0   94742   30992
   7   4   0  487540   46289
   9   4   0  590529   69433
  10   4   0  219748   47094
  11   4   0  634329   70238
  12   4   0  -16100   67621
  13   4   0  684783   97810
  14   4   0  -21132  116729
   1   5   0  166730   11997
   2   5   0 1235962   20553
   3   5   0 2807409   52929
   4   5   0   27576   27975
   5   5   0 4112873   80301
   6   5   0  156776   35019
   7   5   0 1019066   62791
   8   5   0  617766   66816
   9   5   0  622507   62188
  10   5   0  649212   45155
  11   5   0   -2028   54540
  12   5   0  -69634   72251
  13   5   0   53002   92578
  14   5   0  -32401  117533
   0   6   0 1559691   35069
   1   6   0 7717770   87640
   2   6   0 3132417   30745
   3   6   0 1968916   95496
   4   6   0  167753   34817
   5   6   0  -28176   28176
   6   6   0   39890   33610
   7   6   0   13219   22719
   9   6   0 1125018   53378
  10   6   0  839749   76678
  11   6   0  580087   55180
  12   6   0  478454   61622
  13   6   0  249331   96402
  14   6   0   68561  117734
   1   7   0  892709   22311
   2   7   0 1590666   26516
   3   7   0 1381950   25664
   4   7   0 3204805   78086
   5   7   0   35273   32401
   6   7   0 2161492   74665
   7   7   0  211565   27957
   8   7   0 1046733   77885
   9   7   0   -4427   38641
  10   7   0  646909   50025
  11   7   0    9637   55044
  12   7   0   -9187   57878
  13   7   0   27870   71341
  14   7   0   -2150   93130
   0   8   0  614605   67923
   1   8   0  331529   17008
   2   8   0 6020298   48129
   3   8   0  246374   16242
   4   8   0  984228   49005
   5   8   0  198236   36226
   6   8   0  391137   49508
   7   8   0  121357   44879
   8   8   0  880720   61986
   9   8   0  -32279   32279
  10   8   0 1662317   71371
  11   8   0   41375   49144
  12   8   0  808836   69721
  13   8   0   32776   72389
  14   8   0  117503  158992
   1   9   0  287616   20305
   2   9   0 1249607   31497
   3   9   0 1003322   30904
   4   9   0 1529112   36394
   5   9   0  795629   43223
   6   9   0 1167890   71847
   7   9   0   73593   46088
   8   9   0 1344175   90766
   9   9   0  386590   71446
  10   9   0  290286   77282
  11   9   0   88105   90364
  12   9   0   44739  102439
  13   9   0  -45282  130213
  14   9   0  169658  165633
   0  10   0 1782878   49792
   1  10   0  136116   19155
   2  10   0 1616229   44008
   3  10   0 2103561   37023
   4  10   0 1295776   30807
   5  10   0  -36629   38842
   6  10   0  157181   45685
   7  10   0  209709   52528
   8  10   0  100128   61785
   9  10   0  615843   78289
  10  10   0  304164   83119
  11  10   0  861432  109081
  12  10   0  171533  110691
  13  10   0  132023  143495
  14  10   0   72762  179922
   1  11   0   34776   18616
   2  11   0    3027   18328
   3  11   0  700616   31901
   4  11   0  492883   29067
   5  11   0  598970   39123
   6  11   0  237281   50514
   7  11   0 1877318  101433
   8  11   0  131122   61986
   9  11   0  196166   75471
  10  11   0   72688   86540
  11  11   0  175654  106867
  12  11   0   62354  118339
  13  11   0  227523  156376
  14  11   0 -130817  180929
   0  12   0 1428757   51658
   1  12   0 2530430   42035
   2  12   0  -19558   19558
   3  12   0  903711   48179
   4  12   0   13569   19224
   5  12   0   -1435   31761
   6  12   0  164546   55546
   7  12   0  201527   62590
   8  12   0   34054   68628
   9  12   0  578008   87948
  10  12   0   31064   92778
  11  12   0  912824  123168
  12  12   0   -7648  126791
  13  12   0  325038  162816
   1  13   0  110164   21669
   2  13   0  -14211   33870
   3  13   0 1054330   70679
   4  13   0  489370   29954
   5  13   0  608464   36539
   6  13   0  340928   68829
   7  13   0  728973   83722
   8  13   0  255123   80100
   9  13   0 1018357  105457
  10  13   0  -23747   95797
  11  13   0   13684  119143
  12  13   0   56894  146515
  13  13   0 -175093  175093
   0  14   0 2638259   66884
   1  14   0  779653   35429
   2  14   0  453554   28573
   3  14   0  539732   33726
   4  14   0  361015   31811
   5  14   0  142396   30500
   6  14   0   27545   65207
   7  14   0   87570   71042
   8  14   0  143726   85130
   9  14   0  346618   99822
  10  14   0  294950  109482
  11  14   0  377446  130615
  12  14   0  521858  156376
  13  14   0   65816  181733
   1  15   0   77428   23982
   2  15   0  104054   25041
   3  15   0  -29917   34027
   4  15   0  700991   39492
   5  15   0  360990   36648
   6  15   0 2289290  125583
   7  15   0  -79696   79696
   8  15   0 1118183  110086
   9  15   0  298364  104048
  10  15   0  582637  125784
  11  15   0    2547  139872
  12  15   0 -162213  162213
   0  16   0 1240170  153457
   1  16   0  -12101   28205
   2  16   0 1622766   56634
   3  16   0    7078   32847
   4  16   0   21480   33582
   5  16   0  -30970   41773
   6  16   0   57758   78289
   7  16   0  -43673   85534
   8  16   0  545861  107068
   9  16   0   64568  107671
  10  16   0  524187  136251
  11  16   0   66432  151344
  12  16   0  403035  177306
   1  17   0    9451   28567
   2  17   0   51071   36589
   3  17   0   -2717   35698
   4  17   0  666662   44982
   5  17   0  211424   39458
   6  17   0  714056   97810
   7  17   0  276526  100023
   8  17   0  373502  108075
   9  17   0  163735  121558
  10  17   0  289872  139872
  11  17   0 -161608  161608
   0  18   0  866701   59346
   1  18   0  994966   94194
   2  18   0  355815   42804
   3  18   0   76454   39970
   4  18   0  366168   56330
   5  18   0    3365   48027
   6  18   0  322814   99017
   7  18   0  -63396   97207
   8  18   0   87124  113106
   9  18   0  339163  132023
  10  18   0  198241  148326
  11  18   0  161347  172477
   1  19   0   18665   41717
   2  19   0   99363   54315
   3  19   0  604518   84326
   4  19   0  315227  159696
   5  19   0  644300   69513
   6  19   0   53414   98615
   7  19   0  231444  116326
   8  19   0   49709  123369
   9  19   0  539097  148728
  10  19   0  -29785  162213
   0  20   0   12354   82515
   1  20   0  813514   93584
   2  20   0  120955   82314
   3  20   0  646033   93584
   4  20   0  157692   80703
   5  20   0   39722   46180
   6  20   0   28823  112100
   7  20   0  111696  124578
   8  20   0   36830  139872
   9  20   0  448600  163419
   1  21   0  -83320   83320
   2  21   0   81397   88352
   3  21   0  362864   97810
   4  21   0  167602  131218
   5  21   0  609529   58014
   6  21   0  197968  127193
   7  21   0  536750  143293
   8  21   0  115391  150741
   9  21   0  305160  167243
   1  22   0  474964  113106
   3  22   0   -3420   93584
   4  22   0  458925  174892
   5  22   0   29970   58519
   6  22   0  -49911  141482
   7  22   0   81729  150136
   8  22   0   38239  170867
   1  23   0   26902  178414
   2  23   0  168513  182338
   3  23   0  -33005  123168
   4  23   0  192506  130615
   5  23   0   -9248   63651
   6  23   0  613027  163620
   7  23   0  -50917  158389
   0  24   0 1122808  146716
   1  24   0   69941   88778
   2  24   0  703577   99702
   3  24   0   11923   94690
   4  24   0  -20147  223192
   5  24   0   87233   86632
   6  24   0 -126791  170665
   1  25   0   26698  102842
   2  25   0  256445  130313
   3  25   0 -100989  100989
   4  25   0  219705  112459
   5  25   0  -46979   78008
   0  26   0  178797  158590
   1  26   0  332595  115200
   2  26   0  216004  136251
   3  26   0  311868  118845
   4  26   0 -120204  120204
   5  26   0   98264   98309
   1  27   0  109181  131621
   2  27   0   21469  146615
   3  27   0   78180  172879
   4  27   0  -45483  177306
   5  27   0  406376  112306
   6  27   0 -176904  176904
   0  28   0  -25760  187570
   1  28   0  383392  200653
   2  28   0 -195017  195017
   3  28   0  308981  208502
   4  28   0  -92377  203068
   5  28   0    -903  147218
   3  29   0  254885  224803
   4  29   0   76827  233055
   5  29   0  168380  237885
   4  30   0  -92979  175897
 -15   0   1  529434  141281
  13   0   1  495454  102641
   1   1   1 1657249   18252
   2   1   1  870358   13492
   3   1   1 3270415   50514
   4   1   1   99027   20125
   5   1   1 6113458   88553
   6   1   1  437329   41257
   7   1   1 1761980   62590
  10   1   1  -47094   47094
  12   1   1  104997   79094
  13   1   1  432935  103847
  14   1   1   54030   88414
 -15   2   1   80779  131822
 -14   2   1  352400  110892
   0   2   1 5680095   56553
   1   2   1  906774   11809
   2   2   1  722814   13842
   3   2   1  237192   25358
   4   2   1   47664   14213
   5   2   1   19819   22238
   6   2   1  598962   42264
   8   2   1 1259820   46042
   9   2   1  163026   46088
  10   2   1  768747   51029
  11   2   1  932849   69935
  12   2   1  390406   81509
  13   2   1  184286   94188
  14   2   1   40170  120553
 -15   3   1   36460  168653
 -14   3   1 -102641  102641
 -13   3   1   16100   79898
 -12   3   1   78995   62791
  -1   3   1  181871   10783
   0   3   1   22143   13886
   1   3   1   53747    8919
   2   3   1 5976787   48192
   3   3   1  351568   16927
   4   3   1 1463020   32064
   5   3   1 2544530   43939
   6   3   1 3187296   73459
   8   3   1  141813   38036
   9   3   1   67378   46591
  10   3   1   58708   50514
  11   3   1   16704   44410
  12   3   1  152861   77282
  13   3   1  236117   72125
  14   3   1  626615  129206
 -14   4   1  753862  115319
 -13   4   1   22244   79295
 -12   4   1  713208   82113
 -11   4   1   35114   51923
  -2   4   110771236  105860
  -1   4   1  268730   15771
   0   4   1 1228863   20872
   1   4   1    9450   10841
   2   4   1 4976342   33172
   3   4   1  392301   16135
   4   4   1  230390   20630
   5   4   1  -18166   18166
   6   4   1  695339   53333
   7   4   1  127394   37030
   8   4   1 1277670   46845
   9   4   1  116760   31739
  10   4   1 1078419   68125
  11   4   1  -59973   59973
  12   4   1  566179   84326
  13   4   1    9894   70140
  14   4   1  177902   95945
 -14   5   1   49429  106465
 -13   5   1  -15094   86740
 -12   5   1  134966   69030
 -11   5   1  -18113   48502
  -4   5   1 8262242  108276
  -3   5   1  114314   23346
  -2   5   1   91171   10376
  -1   5   1  134697   11322
   0   5   1   98611   13588
   1   5   1 2242891   28735
   2   5   1  550724   17030
   3   5   1  514652   15744
   4   5   1 7941336   62434
   5   5   1 1081901   35820
   6   5   1 1849013   49710
   7   5   1  553668   48904
   8   5   1 1263376   48701
   9   5   1  210544   35207
  10   5   1  -18216   37666
  11   5   1  -25192   45298
  12   5   1  245625   74465
  13   5   1  152388   95596
  14   5   1  199718  131822
 -15   6   1   -3220  159394
 -14   6   1  178664  107068
 -13   6   1  475049   90565
 -12   6   1  620074   79496
 -11   6   1  495495   67421
 -10   6   1  620037   68427
  -9   6   1    9683   37635
  -6   6   1  145159   34414
  -4   6   1 2582441   46579
  -3   6   1  780271   33710
  -2   6   1  383251   17705
  -1   6   1 2023655   28380
   0   6   1 4075708   38779
   1   6   1  372687   20897
   2   6   1  389163   22163
   3   6   1 1553303   25532
   4   6   1   18588   17024
   5   6   1  417778   40151
   6   6   1   10026   21566
   7   6   1 1264150   71446
   8   6   1  364644   36298
   9   6   1 1574804   64603
  10   6   1  475325   63194
  11   6   1  626497   58677
  12   6   1  434394   65804
  13   6   1  533630  156073
  14   6   1   91371  138666
 -14   7   1  -89759  109482
 -13   7   1   95706   88150
 -12   7   1   -8654   65810
 -11   7   1  360742   60980
 -10   7   1  331271   41289
  -5   7   1 2618948   73055
  -4   7   1 1114128   40673
  -3   7   1 4973275   48767
  -2   7   1  107302   13672
  -1   7   1  222928   13907
   0   7   1   68815   12423
   1   7   1 3464894   40041
   2   7   1    1804   15233
   3   7   1 4309641   50370
   4   7   1  861779   40557
   5   7   1 5399385  102238
   6   7   1  209685   26160
   7   7   1  735549   42210
   8   7   1   24514   29251
   9   7   1  218145   38139
  10   7   1  233526   54239
  11   7   1   89633   52209
  12   7   1   64759   61919
  13   7   1  346096   81472
  14   7   1  -21933  114414
 -13   8   1  778914  134640
 -12   8   1   68257   57061
 -11   8   1  749655   58395
 -10   8   1   76018   39550
  -9   8   1  180314   53534
  -7   8   1   39936   41055
  -6   8   1  206626   42666
  -5   8   1 3199572   82917
  -4   8   1   27760   24333
  -3   8   1 4166767   57550
  -2   8   1  357990   18835
  -1   8   1 1104230   24919
   0   8   1  673735   31916
   1   8   1 2206301   35933
   2   8   1    2723   17222
   3   8   1  467019   23942
   4   8   1  333127   28795
   5   8   1  185830   38239
   6   8   1   46611   38641
   7   8   1  841453   75471
   8   8   1   63990   48201
   9   8   1 1357548   64201
  10   8   1  172979   76879
  11   8   1  796368   66465
  12   8   1   63028   63525
  13   8   1  267410  146917
  14   8   1 -110490  160401
 -13   9   1   58816  126389
 -11   9   1  158047   88352
 -10   9   1  159858   74465
  -9   9   1  643000   74665
  -8   9   1   -2213   46489
  -7   9   1  947017   73860
  -6   9   1  -27572   39647
  -5   9   1 1097048   66011
  -4   9   1   18781   19728
  -3   9   1 1189445   30464
  -2   9   1  583547   30588
  -1   9   1    5549   15711
   0   9   1   11461   15410
   1   9   1 2229278   40692
   2   9   1  785412   34248
   3   9   1 5035385   61598
   4   9   1  575829   28989
   5   9   1 2787941   58980
   6   9   1  791795   68628
   7   9   1 1255829   82113
   8   9   1  302086   62590
   9   9   1   -1811   68226
  10   9   1   12910   77282
  11   9   1  159998   90565
  12   9   1  -25961  109081
  13   9   1  123398  137457
  14   9   1 -161608  184148
 -14  10   1  197774  173281
 -13  10   1  161774  140073
 -12  10   1  443425  119545
 -11  10   1  599970  101030
 -10  10   1  384229   82515
  -9  10   1  241438   66615
  -8  10   1  357215   60778
  -7  10   1   -4629   47898
  -6  10   1  454235   52728
  -5  10   1   86910   39445
  -4  10   1 1163550   38838
  -3  10   1 1390434   32655
  -2  10   1 3302767   42664
  -1  10   1 1521686   34429
   0  10   1  568095   26845
   1  10   1  269027   24086
   2  10   1  133495   22367
   3  10   1  160915   22886
   4  10   1   19900   17749
   5  10   1   53729   27701
   6  10   1  218471   49508
   7  10   1  407693   64402
   8  10   1  386412   67621
   9  10   1  282764   73860
  10  10   1  491445   86740
  11  10   1  166205   97005
  12  10   1  127193  119545
  13  10   1   35419  145106
  14  10   1  102036  186161
 -14  11   1   -4629  182942
 -13  11   1 -111897  142288
 -12  11   1   31963  114515
 -11  11   1   82993   94992
 -10  11   1  437499   90163
  -9  11   1  150969   71446
  -8  11   1  829461   81910
  -7  11   1  200939   57760
  -6  11   1  688900   75471
  -5  11   1   75114   41257
  -4  11   1  299268   25549
  -3  11   1  414685   23464
  -2  11   1   -3884   17886
  -1  11   1  180704   20944
   0  11   1 1915019   37917
   1  11   1  -19672   22046
   2  11   1 3692192   86300
   3  11   1  678231   37064
   4  11   1 2781150   40967
   5  11   1  274811   36139
   6  11   1  759943   67220
   7  11   1  332964   64201
   8  11   1  207453   70640
   9  11   1   52570   77080
  10  11   1   93257   89759
  11  11   1   66842   99017
  12  11   1  194813  125784
  13  11   1   64607  157381
 -14  12   1  679085  203268
 -13  12   1  162416  158791
 -12  12   1  762904  135847
 -11  12   1   -4225  104251
 -10  12   1  326619   93784
  -9  12   1  -29785   73257
  -8  12   1  -63596   65207
  -7  12   1   71710   62791
  -6  12   1   58226   51923
  -5  12   1  216210   50514
  -4  12   1 2663842   49904
  -3  12   1   74008   20578
  -2  12   1 1119491   34760
  -1  12   1   88610   20480
   0  12   1 1815011   39022
   1  12   1   -4831   21549
   2  12   1  260395   27711
   3  12   1  521231   34197
   4  12   1  143552   21528
   5  12   1  -16633   34329
   6  12   1  187258   40055
   7  12   1    5451   57358
   8  12   1 1347730  117131
   9  12   1   12168   81709
  10  12   1  612399  103043
  11  12   1   19229  113106
  12  12   1  304533  134439
  13  12   1  156577  172275
 -13  13   1 -161809  161809
 -12  13   1   25377  135243
 -11  13   1  100053  108276
 -10  13   1  321574  106666
  -9  13   1  127595   84728
  -8  13   1  998834   89559
  -7  13   1  630192   79295
  -6  13   1  630479   73459
  -5  13   1  108254   49508
  -4  13   1  557794   32792
  -3  13   1  105016   21758
  -2  13   1   19059   20083
  -1  13   1  111557   21611
   0  13   1 1505673   38823
   1  13   1   86290   24366
   2  13   1 1616084   46325
   3  13   1  998794   42725
   4  13   1 2296251   43642
   5  13   1  857617   44494
   6  13   1 2330343   74784
   7  13   1   76517   64804
   8  13   1  263089   86540
   9  13   1   46376   88150
  10  13   1  -24150  101232
  11  13   1   67652  120754
  12  13   1  164467  147319
  13  13   1  207801  182741
 -13  14   1  587091  191796
 -12  14   1  221831  147721
 -11  14   1  174595  123369
 -10  14   1   11869  103445
  -9  14   1  135364   92778
  -8  14   1  187332   84528
  -7  14   1   69272   73257
  -6  14   1   80852   62590
  -5  14   1 1744489  102641
  -4  14   1  466424   38686
  -3  14   1  728385   39547
  -2  14   1 1585119   40726
  -1  14   1 1985849   43748
   0  14   1  782044   49294
   1  14   1   38340   25463
   2  14   1 1136105   45875
   3  14   1   34716   27104
   4  14   1   -3654   23875
   5  14   1   18890   63697
   6  14   1   76915   65609
   7  14   1  125600   74264
   8  14   1  352418   89157
   9  14   1  363267   97005
  10  14   1  269659  110490
  11  14   1  558002  137658
  12  14   1  164593  162615
 -13  15   1  102257  196023
 -12  15   1   75218  164829
 -11  15   1  181093  136048
 -10  15   1   -8050  110490
  -9  15   1  680830  107470
  -8  15   1   23186   83119
  -7  15   1 1062965   98615
  -6  15   1   86603   71646
  -5  15   1 1448642  107470
  -4  15   1  281464   34308
  -3  15   1  121617   29129
  -2  15   1    9637   27535
  -1  15   1  121155   27230
   0  15   1   22123   24594
   1  15   1  727552   39505
   2  15   1  743139   43191
   3  15   1 1694098   54598
   4  15   1  291166   28748
   5  15   1 1912730   49855
   6  15   1  346639   53461
   7  15   1  855741   96803
   8  15   1   72358   91370
   9  15   1   87341  101634
  10  15   1  108865  115319
  11  15   1   72464  144301
  12  15   1   71310  171671
 -12  16   1   32947  181532
 -11  16   1  502747  160401
 -10  16   1   -3622  118136
  -9  16   1  151228  104048
  -8  16   1  -32401   90364
  -7  16   1  139030   86540
  -6  16   1   28205   80503
  -5  16   1  799395   46767
  -4  16   1   19875   96703
  -3  16   1 1069703   52492
  -2  16   1   78915   30026
  -1  16   1 1788677   56714
   0  16   1   10205   29642
   1  16   1  890726   47782
   2  16   1  119364   32001
   3  16   1   24347   31991
   4  16   1  216816   30767
   5  16   1  369528   33420
   6  16   1  -85363   96803
   7  16   1  728145   98816
   8  16   1  -53936   96603
   9  16   1  776000  125784
  10  16   1   93334  127998
  11  16   1  887536  167847
 -12  17   1 -193206  193206
 -11  17   1  347365  160804
 -10  17   1  124333  134439
  -9  17   1  237281  113709
  -8  17   1  241606  106465
  -7  17   1 1088085  113709
  -6  17   1  336174   89157
  -5  17   1 1135288  124578
  -4  17   1  302963   47122
  -3  17   1   17913   34667
  -2  17   1   77786   38811
  -1  17   1  161751   36073
   0  17   1    2789   34651
   1  17   1  413452   39804
   2  17   1  117060   36435
   3  17   1  714388   44607
   4  17   1  159199   41082
   5  17   1  866227   57575
   6  17   1   73933   56879
   7  17   1  262448   96603
   8  17   1 -105256  105256
   9  17   1  205439  126389
  10  17   1   99038  133231
  11  17   1  122391  174086
 -11  18   1  239681  180728
 -10  18   1  168632  144098
  -9  18   1   42384  122766
  -8  18   1   47508  111093
  -7  18   1  -94389   94389
  -6  18   1  114822   93182
  -5  18   1  112768   37686
  -4  18   1  448042   55103
  -3  18   1  700535   57921
  -2  18   1  880178  101969
  -1  18   1  168587   39185
   0  18   1  243445   40441
   1  18   1  323095   41914
   2  18   1  200436   41830
   3  18   1  -21030   53634
   4  18   1  116953   41664
   5  18   1  -17900   35820
   6  18   1   62835   92377
   7  18   1  194375  107068
   8  18   1  161489  115118
   9  18   1  364754  140073
  10  18   1  513401  160200
 -10  19   1  284576  160603
  -9  19   1  -94992  134238
  -8  19   1  864571  130011
  -7  19   1  138753  109081
  -6  19   1 1233096  120351
  -5  19   1  139143   59089
  -4  19   1  942942  101835
  -3  19   1   38935   71847
  -2  19   1   53496   49635
  -1  19   1  -25163   40389
   0  19   1  162450   45141
   1  19   1   25023   42104
   2  19   1  444762  107470
   3  19   1  359697   65609
   4  19   1  854679   69172
   5  19   1   81095   39654
   6  19   1  359533  105860
   7  19   1   58759  112100
   8  19   1  225352  127595
   9  19   1   15592  145709
  10  19   1   93110  159193
 -10  20   1  156533  174690
  -9  20   1   36585  152754
  -8  20   1   74071  138464
  -7  20   1   51321  125382
  -6  20   1  -22541  107470
  -5  20   1  -23949   99219
  -4  20   1 1132469  118942
  -3  20   1  363353   83119
  -2  20   1  916721   97408
  -1  20   1   36453   43964
   0  20   1  684741   54309
   1  20   1  -45808   45808
   2  20   1  426084   66096
   3  20   1  -23385   61678
   4  20   1  104038   91067
   5  20   1    -307   49239
   6  20   1   39141  110892
   7  20   1   34396  124980
   8  20   1  416420  149331
   9  20   1  120642  167043
  -9  21   1 -166439  166439
  -8  21   1  381152  150942
  -7  21   1  323154  138867
  -6  21   1  997816  146515
  -5  21   1  -26489   62073
  -4  21   1  878100   77290
  -3  21   1  -84528   84528
  -2  21   1   30342   84929
  -1  21   1   61808   69634
   0  21   1   34141   73195
   1  21   1  142807  101232
   2  21   1  512388  100828
   3  21   1  359117   68797
   4  21   1  897545  104855
   5  21   1  324876   58436
   6  21   1  370629  132427
   7  21   1   90064  133834
   8  21   1  151969  160804
  -8  22   1   14775  162615
  -7  22   1  120369  149734
  -6  22   1  170914  138263
  -5  22   1  270382   72684
  -4  22   1  222807   79159
  -3  22   1  472099   92778
  -1  22   1  489656  113106
   1  22   1  456427  124175
   2  22   1  212640  107068
   4  22   1   30057   75526
   5  22   1   20240   59396
   6  22   1   89396  135847
   7  22   1   64338  153156
   8  22   1  207589  174690
  -7  23   1  437580  175293
  -6  23   1  -84125  148728
  -5  23   1  691779   96807
  -4  23   1   60464   83122
  -3  23   1  111271  119948
  -2  23   1    5552  116125
  -1  23   1   96284   80755
   0  23   1   20154   91973
   1  23   1  591508   86454
   2  23   1   20889   79025
   3  23   1  964912  105254
   4  23   1  -93182  132023
   5  23   1  282208   81342
   6  23   1  -56151  153759
   7  23   1  225982  169658
  -6  24   1   99823  171872
  -5  24   1  290944   85238
  -4  24   1  -44679  141482
  -3  24   1  296761   94646
  -2  24   1  -86714   86714
  -1  24   1  659652   96445
   0  24   1   92961   93282
   1  24   1  272518   92746
   2  24   1   73769  113709
   3  24   1   97138  145306
   4  24   1   95969   97984
   5  24   1   32875   88544
   6  24   1 -158590  158590
  -5  25   1  142162  168854
  -4  25   1   82984  106614
  -3  25   1  156676  104534
  -2  25   1   95638  119043
  -1  25   1  -72190   98663
   0  25   1   49549  126590
   1  25   1  148400  100183
   2  25   1  266995  104091
   3  25   1  151296  106982
   4  25   1  199053  130917
   5  25   1  397405   83221
  -5  26   1   59571  118339
  -4  26   1  263361  116828
  -3  26   1  541374  121121
  -2  26   1  209717  114319
  -1  26   1  419564  113418
   0  26   1  522004  162716
   1  26   1   49085  150540
   2  26   1  180172  116750
   3  26   1  -39776  116418
   4  26   1  149556  165231
   5  26   1    -280  103702
  -5  27   1   67897  103643
  -4  27   1  101352  174489
  -3  27   1  117797  170061
  -2  27   1   22791  125181
  -1  27   1  -25505  124460
   0  27   1   -5547  129193
   1  27   1   91357  164628
   2  27   1  243518  124702
   3  27   1  -87144  183545
   4  27   1  499487  114482
   5  27   1   71541  114568
  -5  28   1   65421  118218
  -4  28   1  232143  201055
  -3  28   1 -198236  198236
  -2  28   1  745654  199645
  -1  28   1   91385  194414
   0  28   1  231736  136291
   1  28   1   37725  197030
   2  28   1  151764  205684
   3  28   1   26376  206086
   4  28   1 -122154  122154
   5  28   1   50688  125271
  -5  29   1  184337  135636
  -4  29   1  170098  224401
  -3  29   1   19526  225005
  -2  29   1  107120  203872
   3  29   1  159854  231645
   4  29   1  340812  136809
   5  29   1 -137983  215041
  -4  30   1 -147319  242312
   0   0   2 3182510   40050
   2   0   2  793395   20989
   4   0   2   25363   24150
   6   0   2  734635   49508
   8   0   2 1904942   75270
  10   0   2  971096   87345
  12   0   2  525785   92578
  14   0   2 -131018  131018
   0   1   2 2036253   16400
   1   1   2  842722   12634
   2   1   2 1755835   19132
   3   1   2   88037    9841
   4   1   2 3171559   57961
   5   1   2  157460   53634
   6   1   2 1655260   40179
   7   1   2  162804   37635
   8   1   2  170862   28033
   9   1   2  185522   47698
  11   1   2   61101   45304
  12   1   2  544420   67304
  13   1   2  178162   75202
  14   1   2  272500  116326
   0   2   2 1381800   19482
   1   2   2 3194136   41395
   2   2   2   11866    8236
   3   2   2  350371   14672
   4   2   2  755115   30469
   5   2   2  454370   28498
   6   2   2 1394944   40055
   7   2   2 1029086   41275
   8   2   2  752239   63797
   9   2   2 1030004   62188
  10   2   2 1969153   72573
  11   2   2  112786   70741
  12   2   2  183645   62257
  13   2   2  103204  114314
  14   2   2  -50926  149935
  -1   3   2 5098767   74061
   0   3   2   69071   11308
   1   3   2  173239   11854
   2   3   2  111683    9836
   3   3   2 3137332   28008
   4   3   2 4587946   43792
   5   3   2 2252131   44551
   6   3   2   61013   21683
   7   3   2  360964   44879
   8   3   2   51565   27975
   9   3   2   47697   40452
  10   3   2   14518   60478
  11   3   2  100785   48375
  12   3   2   74234   60523
  13   3   2  473462   81005
  14   3   2  -35501  221583
  -1   4   2   95844   18716
   0   4   2 1116950   26107
   1   4   2 1041204   27251
   2   4   2  777604   17272
   3   4   2   82002   11629
   4   4   2   93095   17657
   5   4   2  692387   34127
   6   4   2  161468   24555
   7   4   2 1563373   47182
   8   4   2   38316   31295
   9   4   2 1109748   55078
  10   4   2   15260   38710
  11   4   2 1106810   73296
  12   4   2  -33907   59770
  13   4   2   79841  121156
  14   4   2   20844   98344
 -14   5   2  -71646   97207
 -13   5   2   -7445   76276
 -12   5   2   13391   59973
  -3   5   2  664547   36829
  -2   5   2  107546   14988
  -1   5   2 5633521   51041
   0   5   2 6686614   95696
   1   5   2     -85   15066
   2   5   2   13785   11765
   3   5   2 7166017   47898
   4   5   2  131825   17516
   5   5   2  930379   36332
   6   5   2   90172   22666
   7   5   2   42877   24749
   8   5   2   53567   28619
   9   5   2  189372   73459
  10   5   2   60865   40932
  11   5   2  143771   52770
  12   5   2   77484   63440
  13   5   2  370097   81904
  14   5   2  309966  104131
 -14   6   2   65609  101232
 -13   6   2  201774   81509
 -12   6   2  218939   65408
 -11   6   2  200934   51521
  -4   6   2 5709842   88553
  -3   6   2 2822015   61785
  -2   6   2 3829796   36416
  -1   6   2  616250   21622
   0   6   2 6100498   72392
   1   6   2  494643   22255
   2   6   2  563699   19763
   3   6   2    3574   13988
   4   6   2  640917   25567
   5   6   2  322411   30832
   6   6   2  645507   63295
   7   6   2  368830   31510
   8   6   2 1207383   52460
   9   6   2  894754   58063
  10   6   2  703235   54004
  11   6   2  444019   61548
  12   6   2  181810   66877
  13   6   2  -55457   81196
  14   6   2   17274  114314
 -14   7   2  160023  105256
 -13   7   2   54730   83521
 -12   7   2  394663   68628
 -11   7   2  112393   50917
  -5   7   2  645857   52327
  -4   7   2  435836   36027
  -3   7   2   -6129   24955
  -2   7   2   99631   14500
  -1   7   2  952682   25416
   0   7   2 5597582   99484
   1   7   2  225635   21957
   2   7   2 3991628   37885
   3   7   2  323498   18585
   4   7   2 1837109   34277
   5   7   2   61851   19532
   6   7   2  302080   28189
   7   7   2  538649   40654
   8   7   2   41775   57659
   9   7   2    3509   35330
  10   7   2  102629   45010
  11   7   2  301200   58014
  12   7   2  423319   82615
  13   7   2   -5752   84654
  14   7   2  488833  114075
 -11   8   2  -48904   54540
  -7   8   2  -20125   38842
  -6   8   2 1291468   65207
  -5   8   2   10385   33408
  -4   8   2 4001418   61997
  -3   8   2  672570   38564
  -2   8   2 6534885   56388
  -1   8   2  110065   17552
   0   8   2 3518878   46413
   1   8   2  441122   27244
   2   8   2  804533   32676
   3   8   2 1203533   34248
   4   8   2 1168324   30166
   5   8   2  119399   39445
   6   8   2 2017699   82113
   7   8   2   28761   27866
   8   8   2 1467045   59575
   9   8   2   47314   39576
  10   8   2 1230255  118641
  11   8   2   16007   56625
  12   8   2  174302   68844
  13   8   2    9266   88709
  14   8   2   65464  174086
 -10   9   2 1911631  121558
  -9   9   2  185946   59571
  -8   9   2 1319244   88150
  -7   9   2  211808   47295
  -6   9   2 1070884   67421
  -5   9   2   42698   52528
  -4   9   2   46003   30389
  -3   9   2   24611   18022
  -2   9   2   21158   18794
  -1   9   2  432685   23666
   0   9   2  614275   45929
   1   9   2  458667   24819
   2   9   2 3647519   73347
   3   9   2  778337   28898
   4   9   2  381139   21733
   5   9   2  584013   77383
   6   9   2 1284180   78289
   7   9   2  113180   50113
   8   9   2  126661   60377
   9   9   2   23979   68628
  10   9   2   55340   50104
  11   9   2  141512   93182
  12   9   2  179079  114111
  13   9   2   84192  148125
 -12  10   2   85643  107470
 -11  10   2  341208   97207
 -10  10   2   48507   79496
  -9  10   2   55040   66011
  -8  10   2  -47495   51923
  -7  10   2  718338   76477
  -6  10   2  518637   54741
  -5  10   2 1521366   51655
  -4  10   2  584131   38829
  -3  10   2 1234511   36039
  -2  10   2 2494248   44144
  -1  10   2 1296893   38127
   0  10   2  299579   24439
   1  10   2  408464   26516
   2  10   2  314902   25113
   3  10   2   10763   20391
   4  10   2  122635   19277
   5  10   2   -7973   28107
   6  10   2  788925   78086
   7  10   2  612758   67822
   8  10   2  770272   80503
   9  10   2  -15697   71847
  10  10   2   96163   87948
  11  10   2  309018  105860
  12  10   2  149156  129809
  13  10   2  171904  158389
 -13  11   2  318344  143897
 -12  11   2   98708  114716
 -11  11   2  416256  102842
 -10  11   2   15722   78289
  -9  11   2 1192645  112100
  -8  11   2  136866   63797
  -7  11   2  834804   80100
  -6  11   2  185356   49307
  -5  11   2  385604   53132
  -4  11   2  424803   63797
  -3  11   2   20454   21382
  -2  11   2   40029   21150
  -1  11   2  289250   24760
   0  11   2  174268   24630
   1  11   2 7323721   72026
   2  11   2  942426   39079
   3  11   2 2268455   43892
   4  11   2  312422   22496
   5  11   2 1415645   37442
   6  11   2  -23519   37635
   7  11   2  186456   59371
   8  11   2   24602   64804
   9  11   2   22292   81308
  10  11   2   80186   91571
  11  11   2  298973  112100
  12  11   2   85913  130615
  13  11   2  513806  168452
 -14  12   2   82101  191193
 -13  12   2  378544  162010
 -12  12   2   46899  116930
 -11  12   2  289233  108276
 -10  12   2   55589   91169
  -9  12   2   17269   76678
  -8  12   2   26325   65005
  -7  12   2  404038   69433
  -6  12   2  133013   54339
  -5  12   2 1345129   59339
  -4  12   2  -27055   29523
  -3  12   2 3301591   52173
  -2  12   2 1141678   40122
  -1  12   2 4005878   55722
   0  12   2  169400   29333
   1  12   2  931795   39414
   2  12   2  330029   27570
   3  12   2   24769   23366
   4  12   2   13383   22919
   5  12   2  227687   25588
   6  12   2   -9581   37639
   7  12   2  968361  103445
   8  12   2   24054   76075
   9  12   2  865403  101835
  10  12   2   39216   95797
  11  12   2   87858  110892
  12  12   2  -25358  142489
  13  12   2  112905  173281
 -14  13   2  -92979  197834
 -13  13   2   17991  158992
 -12  13   2 -115923  128804
 -11  13   2  215675  112905
 -10  13   2  185880   97005
  -9  13   2 1042011  102238
  -8  13   2  316852   76879
  -7  13   2  775120   79496
  -6  13   2  225005   61785
  -5  13   2  170092   37639
  -4  13   2   67158   70540
  -3  13   2  251006   27139
  -2  13   2  400260   28733
  -1  13   2  759682   34114
   0  13   2  790406   40382
   1  13   2 3849041   59321
   2  13   2  629979   32501
   3  13   2 1886921   49511
   4  13   2  159477   24396
   5  13   2 1246973   44095
   6  13   2  422709   48100
   7  13   2  493883   80503
   8  13   2   18963   80301
   9  13   2   17213   88753
  10  13   2  120334  102641
  11  13   2  160309  121558
  12  13   2 -151344  151344
 -13  14   2  -69232  172073
 -12  14   2  144673  144301
 -11  14   2  -16502  117533
 -10  14   2   95556  101232
  -9  14   2   52442   86138
  -8  14   2   -4427   79295
  -7  14   2   52952   71847
  -6  14   2  331267   67220
  -5  14   2  184750   41604
  -4  14   2  980516   69215
  -3  14   2  369245   46710
  -2  14   2 1776097   49935
  -1  14   2 2239980   51921
   0  14   2 1704476   48520
   1  14   2  755141   40352
   2  14   2   36617   26461
   3  14   2  -18964   36632
   4  14   2  213201   27316
   5  14   2  307657   40164
   6  14   2 1012137   72722
   7  14   2  762358   91571
   8  14   2  489045  100427
   9  14   2  258651  102036
  10  14   2  144415  109281
  11  14   2  213616  132427
  12  14   2   87211  168048
 -13  15   2  -54540  200653
 -12  15   2  -77885  156980
 -11  15   2 -125583  125583
 -10  15   2  508977  118741
  -9  15   2   24109   96803
  -8  15   2  932958  102439
  -7  15   2   60502   80904
  -6  15   2  995364  113709
  -5  15   2  113631   42867
  -4  15   2   94226   29260
  -3  15   2   30349   28157
  -2  15   2  570302   36426
  -1  15   2   84405   27404
   0  15   2 1195945   48075
   1  15   2  327647   31704
   2  15   2 1491309   52961
   3  15   2  162198   31304
   4  15   2 2154591   67132
   5  15   2   42721   30985
   6  15   2  392732   54773
   7  15   2  145048   83923
   8  15   2   62868   93182
   9  15   2 -103646  103646
  10  15   2  132095  125382
  11  15   2  -50917  141683
 -12  16   2  224803  169256
 -11  16   2   28423  143093
 -10  16   2  -23747  118136
  -9  16   2   31073  103445
  -8  16   2   46411   94188
  -7  16   2  -56955   80904
  -6  16   2 1397925  126590
  -5  16   2   16897   45379
  -4  16   2 1672046  127795
  -3  16   2   47320   31566
  -2  16   2 2330678   60303
  -1  16   2   49659   29735
   0  16   2 1414605   54959
   1  16   2   98705   38038
   2  16   2    8738   32022
   3  16   2  -39951   39951
   4  16   2   29703   29532
   5  16   2   24891   30798
   6  16   2 1040501   58453
   7  16   2   61150   85333
   8  16   2 1020570  114515
   9  16   2 -108477  109482
  10  16   2  647998  144502
  11  16   2  251591  164023
 -12  17   2 -181935  181935
 -11  17   2 -107872  151545
 -10  17   2  428720  137658
  -9  17   2  545053  121759
  -8  17   2  548750  113709
  -7  17   2  434327   98414
  -6  17   2  555396   94389
  -5  17   2  484270   94791
  -4  17   2   13873   41272
  -3  17   2   30948   36210
  -2  17   2  329921   38935
  -1  17   2   57940   33610
   0  17   2  885345   51884
   1  17   2    9996   35052
   2  17   2 1875430   68705
   3  17   2  670550  110993
   4  17   2 2157533   64178
   5  17   2    8256   33767
   6  17   2   47490   59642
   7  17   2  270285   67417
   8  17   2    2452  104452
   9  17   2 -116930  120754
  10  17   2 -140073  140073
  11  17   2  222789  185557
 -11  18   2  -80301  171068
 -10  18   2 -136048  136048
  -9  18   2   93651  123369
  -8  18   2   68330  108678
  -7  18   2  -10062   99017
  -6  18   2  237684   95194
  -5  18   2  518047   89157
  -4  18   2  277497   45141
  -3  18   2 1452636  121960
  -2  18   2  313551   48904
  -1  18   2  602612   43998
   0  18   2  526979   48079
   1  18   2  377128   42988
   2  18   2  -19003   38745
   3  18   2   -7077   51495
   4  18   2  167061   42064
   5  18   2  234029   53972
   6  18   2   78451   65558
   7  18   2  278757  141784
   8  18   2  306111  123973
   9  18   2  619094  143495
  10  18   2 -130213  161206
 -11  19   2  -32804  180326
 -10  19   2   65036  155168
  -9  19   2  451324  143495
  -8  19   2  113579  120553
  -7  19   2  930845  126993
  -6  19   2  257129  104452
  -5  19   2  495776  102439
  -4  19   2   74294   42976
  -3  19   2   11230   49957
  -2  19   2   20727   50936
  -1  19   2  475816   54264
   0  19   2   92957   42035
   1  19   2  562225   50151
   2  19   2  141531   53238
   3  19   2 1215479   85596
   4  19   2  148404   62217
   5  19   2  481232   47989
   6  19   2   77045   51615
   7  19   2  -80503  112100
   8  19   2 -128804  128804
   9  19   2  169762  150540
 -10  20   2   78725  173683
  -9  20   2  -13283  145106
  -8  20   2  -13483  129005
  -7  20   2  362650  125985
  -6  20   2   86678  109684
  -5  20   2  756120  116326
  -4  20   2  502325   64265
  -3  20   2 1633845   91195
  -2  20   2  -62690   62690
  -1  20   2  352005   84929
   0  20   2    8074   46010
   1  20   2  348092  104965
   2  20   2  -11655   72653
   3  20   2   39244   61608
   4  20   2  195165   51188
   5  20   2  138175   56239
   6  20   2   13822   87847
   7  20   2  -50113  122766
   8  20   2  -57760  138666
   9  20   2  780780  162414
  -9  21   2  453631  171671
  -8  21   2  166961  146111
  -7  21   2  447588  137658
  -6  21   2  651577  137056
  -5  21   2  209344   68811
  -4  21   2   38732   74163
  -3  21   2   55080   62375
  -2  21   2  206024   62659
  -1  21   2   89886   61077
   0  21   2  261964  111696
   1  21   2  640596  103646
   2  21   2  167570   67390
   3  21   2  890126  118136
   4  21   2  355234   98046
   5  21   2  330770   52160
   6  21   2  -34063   71334
   7  21   2  -92778  133231
   8  21   2  -33207  161206
  -8  22   2   29998  166640
  -7  22   2   74236  146111
  -6  22   2  414387  142691
  -5  22   2  224803  132023
  -4  22   2  280919   78278
  -3  22   2  150666   90766
  -2  22   2  232910  199545
  -1  22   2  170581   71738
   0  22   2  155508   76495
   1  22   2  145773   93182
   2  22   2   70692  114716
   3  22   2   27294   82009
   4  22   2   24405   59396
   5  22   2  177368   55075
   6  22   2  153506   98414
   7  22   2  335470  166841
  -8  23   2  525681  203068
  -7  23   2  137098  165432
  -6  23   2  715064  159394
  -5  23   2  -20147   70028
  -4  23   2  -68394   87847
  -3  23   2  119201  123973
  -2  23   2   31528  115923
  -1  23   2   42369   63614
   0  23   2  633147   69834
   1  23   2  -81838   84548
   2  23   2 1955898  101515
   3  23   2   56955   69480
   4  23   2  589709   64121
   5  23   2  -81035   81035
   6  23   2  138278  156376
  -7  24   2 -101634  181532
  -6  24   2  255188  181733
  -5  24   2   92464  128703
  -4  24   2  950042  158389
  -3  24   2  -12461   89460
  -2  24   2  479864   92753
  -1  24   2  -40558   86648
   0  24   2  601722   76250
   1  24   2  -18988   71159
   2  24   2   41385   74897
   3  24   2  107507   94772
   4  24   2   -2267   72165
   5  24   2   18729  113350
   6  24   2  149028  168854
  -5  25   2   34547   88753
  -4  25   2   65820  247745
  -3  25   2   50877   98901
  -2  25   2  148308   99161
  -1  25   2  -87865   97121
   0  25   2  438472  156276
   1  25   2  373620  102141
   2  25   2  156712  102729
   3  25   2  127331  109568
   4  25   2  260680   81978
   5  25   2   21838   96907
  -5  26   2  244042   92159
  -4  26   2  253106  117682
  -3  26   2  375110  118036
  -2  26   2  141380  111075
  -1  26   2  326757  113106
   0  26   2  131030  109486
   1  26   2  213240  113820
   2  26   2   56947  164123
   3  26   2   64513  117069
   4  26   2   54610  267267
   5  26   2  143238  107772
  -5  27   2  139007  124980
  -4  27   2  -69030  175696
  -3  27   2   15517  169055
  -2  27   2 -130817  130817
  -1  27   2  189252  207695
   0  27   2    7741  155570
   1  27   2  425178  135119
   2  27   2   18037  125701
   3  27   2  187932  190186
   4  27   2  149595  118414
   5  27   2  195511  192502
   6  27   2 -140073  200250
  -5  28   2  -75865  114515
  -4  28   2 -194211  194211
  -3  28   2  418232  201859
  -2  28   2 -191193  191193
  -1  28   2  283237  200653
   0  28   2  -98011  179318
   1  28   2   92967  194414
   2  28   2  254164  213935
   3  28   2  -47094  216954
   4  28   2   30207  241004
   5  28   2 -151458  157482
  -4  29   2  106177  221784
  -3  29   2  110795  223192
  -2  29   2   78978  209709
   4  29   2   85172  139710
   5  29   2  124726  176401
  -4  30   2  162125  230840
   1   0   320002354  123268
   3   0   3   33730   15150
   5   0   3 7516239  108678
   7   0   3 1110519   63396
   9   0   3 1602855   84929
  11   0   3  438378   83320
  13   0   3 -110691  110691
   0   1   3    2996    6211
   1   1   3 2404933   21783
   2   1   3 2845667   25424
   3   1   3 1544588   22236
   4   1   3   67389   16308
   5   1   3 2980764   50579
   6   1   3  444238   31514
   7   1   3   25575   47898
   8   1   3  408371   35150
   9   1   3  320540   38917
  10   1   3    7728   41408
  11   1   3  786465   62827
  12   1   3  107366   65241
  13   1   3  366470   90866
  14   1   3  -53879  136351
  -1   2   3 1010708   26163
   0   2   3 3707201   39386
   1   2   3   -4988    8277
   2   2   3    3648    8922
   3   2   3  459820   18086
   4   2   3 1501207   42304
   5   2   3 1045017   50717
   6   2   3  549621   36027
   7   2   3 2662691   89358
   8   2   3 1203820   49494
   9   2   3  171227   38745
  10   2   3  392060   98011
  11   2   3  258478   55440
  12   2   3   50316   64623
  13   2   3  -36967  177005
  14   2   3 -101510  224401
  -1   3   312787397  259116
   0   3   3 4040442   40051
   1   3   3  356850   14557
   2   3   3  759268   17572
   3   3   3 3142847   30816
   4   3   3 1383696   27004
   5   3   3  346998   30591
   6   3   3   72137   31497
   7   3   3  235637   28345
   8   3   3   57694   67722
   9   3   3   45479   45182
  10   3   3  354917   85534
  11   3   3    9116   64402
  12   3   3  830146   87144
  13   3   3   52672   81822
  14   3   3  506886  112379
  -1   4   3  436477   20574
   0   4   3 3441144   39748
   1   4   3   73914   11894
   2   4   3  780929   18630
   3   4   3    -324   12140
   4   4   3 1393778   27666
   5   4   3  136007   23346
   6   4   3 3086713   92175
   7   4   3   69510   26375
   8   4   3 1363037   52325
   9   4   3  -33907   33907
  10   4   3  898467   62891
  11   4   3   33542   52488
  12   4   3   65906   63410
  13   4   3  -29872  157181
  14   4   3  -27508  240904
 -14   5   3  209664   94389
  -2   5   3 2191480   46289
  -1   5   3 9648996  142086
   0   5   3 1926593   34692
   1   5   3 1413026   42967
   2   5   3 2722121   34273
   3   5   3  873700   24100
   4   5   3 1381160   27858
   5   5   3   65354   17769
   6   5   3   81004   23780
   7   5   3   23187   26091
   8   5   3  152558   33369
   9   5   3  178447   39014
  10   5   3  490675   51725
  11   5   3  329798   87446
  12   5   3  338004  101634
  13   5   3  -20886   85628
  14   5   3  377282  117992
 -13   6   3  211444   75069
  -4   6   3 3451544   70640
  -3   6   3 8212318   72648
  -2   6   3  649545   38842
  -1   6   3 1374344   31657
   0   6   3   27998   15622
   1   6   3   11481   16502
   2   6   3  192231   17375
   3   6   3   -1589   17249
   4   6   3  160456   16605
   5   6   3  794114   31960
   6   6   3  908617   41744
   7   6   3 1107126   47939
   8   6   3 1605557   59365
   9   6   3  803928   62810
  10   6   3  157642   48210
  11   6   3  181727   59129
  12   6   3  -68508   68508
  13   6   3  -86620   86620
  14   6   3   57051  134540
 -13   7   3  446710   80301
  -6   7   3    7951   33005
  -4   7   3  216081   37030
  -3   7   3  177846   22480
  -2   7   3   92886   15030
  -1   7   3 1043675   31823
   0   7   3 1063223   32904
   1   7   3 1605333   39523
   2   7   3   11718   16800
   3   7   3 2899116   42508
   4   7   3   54828   16575
   5   7   3  500031   24219
   6   7   3  282659   52929
   7   7   3   21708   27944
   8   7   3   65045   33811
   9   7   3  107846   39607
  10   7   3   -6186   45775
  11   7   3  683627   65039
  12   7   3   56738   71419
  13   7   3  565718   96563
  14   7   3  154357  150338
  -6   8   3   73204   37433
  -5   8   3 5026542   66148
  -4   8   3  343626   29004
  -3   8   3 3703753   67421
  -2   8   3  439064   24997
  -1   8   3 2935365   40322
   0   8   3  196154   19147
   1   8   3  634804   33623
   2   8   3  -16066   16066
   3   8   3  602209   25289
   4   8   3   -7331   16633
   5   8   3 1364487   38319
   6   8   3   33679   28351
   7   8   3 2160222   78188
   8   8   3   -6631   34622
   9   8   3 1034679   63204
  10   8   3  114524   70339
  11   8   3  175056   64278
  12   8   3   -7065   72166
  13   8   3  -84934   93022
  -6   9   3   21151   39044
  -5   9   3   -5233   37232
  -4   9   3   15680   23602
  -3   9   3   50885   17688
  -2   9   3   47972   19385
  -1   9   3  324953   21805
   0   9   3 2136991   40875
   1   9   3  774899   40717
   2   9   3  453324   26547
   3   9   3  277092   21475
   4   9   3   87229   18691
   5   9   3   71875   29845
   6   9   3  129656   34795
   7   9   3  328910   59973
   8   9   3  -49911   58766
   9   9   3  251108   47483
  10   9   3   17616   92175
  11   9   3  596816  101130
  12   9   3   -9659  123168
  13   9   3  653829  171671
  -9  10   3  292473   66415
  -8  10   3  -10263   52327
  -7  10   3  319895   56352
  -6  10   3 2352318   59979
  -5  10   3  577091   46239
  -4  10   3 1978888   53498
  -3  10   3  741735   30502
  -2  10   3 1484895   38769
  -1  10   3  894211   44360
   0  10   3  562109   28904
   1  10   3  450231   26501
   2  10   3   72623   21491
   3  10   3  544045   24461
   4  10   3  916041   32854
   5  10   3 1480320   37910
   6  10   3  961199   58754
   7  10   3  485229   65207
   8  10   3 1586905  110288
   9  10   3  972854   96803
  10  10   3  212721   91370
  11  10   3   63870  106465
  12  10   3  -74264  131419
  13  10   3  174039  167444
 -14  11   3  -79696  171068
 -11  11   3  110988  100628
 -10  11   3 1267464  132225
  -9  11   3  236409   70640
  -8  11   3 1339562   96803
  -7  11   3  335083   58766
  -6  11   3   16171   30951
  -5  11   3   12527   29523
  -4  11   3  248004   32489
  -3  11   3   27527   20577
  -2  11   3 3047542   50822
  -1  11   3   87872   21739
   0  11   3 3148868   85904
   1  11   3  621369   31869
   2  11   3 2698299   49470
   3  11   3  337001   23483
   4  11   3 1393904   37127
   5  11   3   66401   22696
   6  11   3 1219933   94891
   7  11   3   22813   62791
   8  11   3   74939   74264
   9  11   3  144814   85534
  10  11   3   89102   93182
  11  11   3   76436  110490
  12  11   3  381600  142691
 -13  12   3   83700  146313
 -12  12   3  247163  127394
 -11  12   3  -39044  103043
 -10  12   3  114312   90766
  -9  12   3  -43470   71042
  -8  12   3  145465   64402
  -7  12   3  -40654   52929
  -6  12   3  853102   58200
  -5  12   3   29535   60478
  -4  12   3 2556440   64375
  -3  12   3   28935   20722
  -2  12   3 2998646   51269
  -1  12   3    3779   22741
   0  12   3  454614   29420
   1  12   3  507248   33257
   2  12   3   82888   24558
   3  12   3   -2705   29339
   4  12   3 1901275   42001
   5  12   3  309030   35469
   6  12   3 1624446   72121
   7  12   3  -35622   64804
   8  12   3 1680509  125382
   9  12   3  -35823   84326
  10  12   3  322949  103646
  11  12   3   89941  120754
  12  12   3  142577  159394
 -14  13   3  190448  209508
 -13  13   3  -96402  158389
 -12  13   3  815404  145306
 -11  13   3  310414  115923
 -10  13   3  877317  116326
  -9  13   3  291100   83320
  -8  13   3  602762   82715
  -7  13   3  136789   67220
  -6  13   3  755853   56844
  -5  13   3  -21502   33035
  -4  13   3   53982   33285
  -3  13   3  511857   39882
  -2  13   3  728867   39702
  -1  13   3  114771   24563
   0  13   3 1460825   45698
   1  13   3  539014   40332
   2  13   3 1098515   44032
   3  13   3  104753   23311
   4  13   3  432808   29075
   5  13   3  612066   34694
   6  13   3  673452  104150
   7  13   3   38142   50185
   8  13   3  -51320   76477
   9  13   3   42273   93784
  10  13   3  428072  111495
  11  13   3    -403  130615
  12  13   3  423724  171268
 -13  14   3   98845  170464
 -12  14   3   46351  139671
 -11  14   3   23757  119746
 -10  14   3   31315  102036
  -9  14   3   -6238   86942
  -8  14   3  -33610   74465
  -7  14   3  614258   86339
  -6  14   3  317756   46804
  -5  14   3  232656   42573
  -4  14   3 1044388   62327
  -3  14   3  522512   34236
  -2  14   3  421677   30673
  -1  14   3 1069030   43789
   0  14   3  371565   30720
   1  14   3  121682   26441
   2  14   3   32278   26327
   3  14   3  249411   32351
   4  14   3   12130   25555
   5  14   3 1325251   69026
   6  14   3 1434245   80598
   7  14   3  605583   60821
   8  14   3  377378   92979
   9  14   3  611014  106061
  10  14   3  250504  122766
  11  14   3  -14088  140477
 -13  15   3  -96201  189985
 -12  15   3  113313  150338
 -11  15   3  420047  133834
 -10  15   3   46963  104452
  -9  15   3  187066   98213
  -8  15   3  -22338   85534
  -7  15   3  486839   85333
  -6  15   3  -16100   53936
  -5  15   3   56682   41577
  -4  15   3  206168   44545
  -3  15   3  360551   31573
  -2  15   3   57339   28514
  -1  15   3 2102776   72232
   0  15   3  130420   32729
   1  15   3 2105947   56796
   2  15   3  492983   37060
   3  15   3 1964031   59861
   4  15   3   13341   28551
   5  15   3  281760   33179
   6  15   3   69450   55345
   7  15   3    8350   57748
   8  15   3  141950   93584
   9  15   3   74393  107872
  10  15   3  -16302  127797
  11  15   3  456761  163018
 -13  16   3  323229  203068
 -12  16   3 -159796  159796
 -11  16   3   81391  138464
 -10  16   3   -9056  114716
  -9  16   3  -54138   97408
  -8  16   3  -45282   92979
  -7  16   3  409851   96402
  -6  16   3   26902   65408
  -5  16   3 1920255   84411
  -4  16   3  -30817   30817
  -3  16   3 1759268   56607
  -2  16   3  470454   36792
  -1  16   3 1366988   54736
   0  16   3  460687   37927
   1  16   3  124634   33648
   2  16   3  -41460   57066
   3  16   3  476608   41376
   4  16   3   78615   31751
   5  16   3  920212   47632
   6  16   3   76954   35572
   7  16   3 1277154   93317
   8  16   3   31231  100828
   9  16   3  338704  125583
  10  16   3  -61785  137256
  11  16   3  137092  161608
 -12  17   3 -180326  180326
 -11  17   3  775304  164023
 -10  17   3  469843  138666
  -9  17   3  421631  115721
  -8  17   3  219180  105457
  -7  17   3  135243   90967
  -6  17   3  123161   54545
  -5  17   3   17611   49710
  -4  17   3   45557   38239
  -3  17   3   71422   33738
  -2  17   3  310691   39517
  -1  17   3  491631   41577
   0  17   3   81134   35707
   1  17   3  952115   50251
   2  17   3  600637   74448
   3  17   3 1292874   79427
   4  17   3  163188   55675
   5  17   3  312971   38366
   6  17   3   25238   44320
   7  17   3   22403   96402
   8  17   3 -107671  107671
   9  17   3   64665  123570
  10  17   3   96978  154161
 -12  18   3  -77684  189784
 -11  18   3   28360  166035
 -10  18   3   42869  140477
  -9  18   3   43479  121156
  -8  18   3  268762  111495
  -7  18   3  484222  106263
  -6  18   3  106050   97005
  -5  18   3  814068   83119
  -4  18   3 2040128   93640
  -3  18   3  156283   40307
  -2  18   3  752014   57973
  -1  18   3  256751   40751
   0  18   3  271407   47251
   1  18   3  127332   40352
   2  18   3   16172   40082
   3  18   3   53429   54930
   4  18   3  395915   46064
   5  18   3  170382   40495
   6  18   3  661162   47751
   7  18   3  286873   78336
   8  18   3  385223  125181
   9  18   3  348364  138263
  10  18   3  275014  171268
 -11  19   3  239462  193206
 -10  19   3  723644  168452
  -9  19   3   27030  135243
  -8  19   3  269885  128200
  -7  19   3  -63194  107269
  -6  19   3  178977  104653
  -5  19   3  362187   66735
  -4  19   3   86623   44789
  -3  19   3   23846   42314
  -2  19   3  596273   60276
  -1  19   3    6609   47520
   0  19   3 1719752   73082
   1  19   3   92584   60767
   2  19   3 1057720  110691
   3  19   3   17088   57036
   4  19   3  756895   54644
   5  19   3   95451   43314
   6  19   3  247860   90692
   7  19   3   23872  186866
   8  19   3   92138  130817
   9  19   3 -123570  147520
 -10  20   3   81904  175093
  -9  20   3   69907  144301
  -8  20   3  286719  136854
  -7  20   3  -45080  119948
  -6  20   3  715868  124779
  -5  20   3   84303   66105
  -4  20   3 1117925   64892
  -3  20   3   12616   67621
  -2  20   3  521579   63582
  -1  20   3   10305   55908
   0  20   3  164230   67373
   1  20   3    7139   45357
   2  20   3   35829   60925
   3  20   3   17777   60782
   4  20   3  199762   65191
   5  20   3  173685   50439
   6  20   3  407854   67971
   7  20   3  -29445  126288
   8  20   3  541668  149532
 -10  21   3  345122  221583
  -9  21   3  137046  174489
  -8  21   3  275437  150338
  -7  21   3  -13886  136251
  -6  21   3  239446  125583
  -5  21   3   21840  115319
  -4  21   3    2568   52225
  -3  21   3   43231   61646
  -2  21   3  385437   66246
  -1  21   3  109155  104150
   0  21   3  602512   95596
   1  21   3  490608  100427
   2  21   3 1712985  103998
   3  21   3  153183   97810
   4  21   3  347658   84328
   5  21   3  133680   53084
   6  21   3   33515   56553
   7  21   3 -132628  145106
   8  21   3 -147319  147319
  -9  22   3  252229  183343
  -8  22   3  122547  169256
  -7  22   3  306700  152754
  -6  22   3  195898  137457
  -5  22   3  574385  139872
  -4  22   3  179861   60646
  -3  22   3  242960  185960
  -2  22   3  360622  330161
  -1  22   3  224526   71640
   0  22   3  103747   71492
   1  22   3  111742   61097
   2  22   3   51133   74814
   3  22   3  111475   77853
   4  22   3   92389   61040
   5  22   3  348721   69001
   6  22   3  -12946   72873
   7  22   3  297630  164829
  -8  23   3   96884  175897
  -7  23   3  499999  167847
  -6  23   3    1736  154565
  -5  23   3   -9862  140477
  -4  23   3  -77919   77919
  -3  23   3   65365   82639
  -2  23   3   53404   78842
  -1  23   3  539593   68982
   0  23   3  -34491   62475
   1  23   3 1184542   77605
   2  23   3   74334   69090
   3  23   3  503487   75578
   4  23   3   69326   59539
   5  23   3  247109   71896
   6  23   3   -3067   92322
  -7  24   3  358981  187771
  -6  24   3   56119  174288
  -5  24   3  379364  158791
  -4  24   3   57615  149331
  -3  24   3  406460  102981
  -2  24   3   -3772   72100
  -1  24   3  351280   73560
   0  24   3  105516   73603
   1  24   3   50582   74259
   2  24   3  -74234   74234
   3  24   3  522372   82041
   4  24   3   19202   66292
   5  24   3  456008   73917
   6  24   3  -96195   96195
  -5  25   3 -176098  176098
  -4  25   3   53196  105980
  -3  25   3  205067  103377
  -2  25   3   43507  122364
  -1  25   3  936021   86310
   0  25   3  400778   82988
   1  25   3  416727   85672
   2  25   3  228629   85397
   3  25   3  174018   89722
   4  25   3  -72188   72188
   5  25   3  381944  104857
   6  25   3  -50314  177507
  -4  26   3  216000  237080
  -3  26   3  360346  118983
  -2  26   3  110707  112838
  -1  26   3  142978  114917
   0  26   3  262870   90490
   1  26   3   73706   93153
   2  26   3   24084   93169
   3  26   3 -117957  117957
   4  26   3  272355  110844
   5  26   3  129783  258714
   6  26   3  -78289  196426
  -4  27   3  -23747  170061
  -3  27   3    8379  168048
  -2  27   3  306603  124723
  -1  27   3  195285  125900
   0  27   3  -12822  129331
   1  27   3  -44754  132295
   2  27   3  322135  195419
   3  27   3   35026  197231
   4  27   3 -103452  120554
   5  27   3 -146486  185457
   6  27   3  -16452  136251
  -4  28   3  426777  191997
  -3  28   3 -133633  193809
  -2  28   3  556102  200250
  -1  28   3   75035  196829
   0  28   3   95251  191394
   2  28   3 -146111  198035
   3  28   3 -120553  217357
   4  28   3  220219  133606
   5  28   3 -157814  218162
  -4  29   3 -217961  217961
  -3  29   3 -112100  221181
  -2  29   3  111878  212728
   4  29   3  146851  180123
  -4  30   3  343217  239293
   0   0   4  552097   20105
   2   0   4 2129698   33427
   4   0   4 6032546   65816
   6   0   4 2824710   74061
   8   0   4  428059   54741
  10   0   4  129693   68829
  12   0   4  114480   97609
  14   0   4  283234  160401
  -1   1   4 1542061   21803
   0   1   4 3320035   25676
   1   1   4 3661507   28685
   2   1   4 1584105   21725
   3   1   4   19287   12275
   4   1   4  745818   25219
   5   1   4  389430   26060
   6   1   4   90395   28176
   7   1   4  -38894   58465
   8   1   4  444835   39419
   9   1   4  396981   43677
  10   1   4 1103809   86841
  11   1   4  130430   77986
  12   1   4  974815  181935
  13   1   4   61660  119243
  14   1   4  306297  114321
  -1   2   4    3527    9941
   0   2   4 1937525   24072
   1   2   4   93446    9673
   2   2   4 2132506   25075
   3   2   4 2454589   30217
   4   2   4  353216   18591
   5   2   4  554554   28326
   6   2   4 1108455   42401
   7   2   4  241735   53333
   8   2   4  545212   40389
   9   2   4  242311   41417
  10   2   4  282970   51148
  11   2   4   56116   67119
  12   2   4   35681   70805
  13   2   4   92735   90361
  14   2   4  119669  112331
  -1   3   4 6477476   50175
   0   3   4 3907847   37272
   1   3   4 5791779   48076
   2   3   4  419576   17963
   3   3   4 9040988   56146
   4   3   4 1209062   27610
   5   3   4  217635   18649
   6   3   4  102863   26967
   7   3   4  295426   31338
   8   3   4  284539   35920
   9   3   4  875187   50936
  10   3   4   52659   47642
  11   3   4 1096118   80560
  12   3   4  115257   89055
  13   3   4  486546   92979
  14   3   4  109616  165030
  -1   4   4 2575700   32370
   0   4   4  555327   24458
   1   4   4  120952   12964
   2   4   4  775068   20730
   3   4   4 1598359   28327
   4   4   4  311210   20333
   5   4   4 1451604   44604
   6   4   4  118363   25397
   7   4   4 1079220   47367
   8   4   4  356935   46188
   9   4   4  167082   76477
  10   4   4  -22260   46960
  11   4   4   63152   56184
  12   4   4  136167   90967
  13   4   4   55222  169156
  14   4   4   68213  163620
  -2   5   4  257127   30591
  -1   5   4 3591005   78289
   0   5   4  217225   17033
   1   5   4 4337335   40010
   2   5   4 1183324   29061
   3   5   4  541079   24661
   4   5   4  162915   16683
   5   5   4  202191   23180
   6   5   4   15141   20455
   7   5   4  692154   45610
   8   5   4  143336   35695
   9   5   4 1223940   67505
  10   5   4  270010   50570
  11   5   4  751173   68940
  12   5   4  216151   81810
  13   5   4  692664  103847
  -2   6   4   18640   13727
  -1   6   4  644941   26591
   0   6   4  417312   26245
   1   6   4  175767   15727
   2   6   4   17179   16994
   3   6   4   19562   18097
   4   6   4 2042226   32597
   5   6   4 1334309   38664
   6   6   4  854345   64753
   7   6   4  208356   33717
   8   6   4  111109   44679
   9   6   4  181361  108578
  10   6   4   57525   49310
  11   6   4   37888   59771
  12   6   4  -60642   73146
  13   6   4   91627   94041
  -4   7   4  542488   54138
  -3   7   4  611214   46489
  -2   7   4 3579414   46650
  -1   7   4   -3952   17127
   0   7   4 2213530   42942
   1   7   4   26073   20683
   2   7   4 4875601   52141
   3   7   4 1029640   33807
   4   7   4  183946   22077
   5   7   4   27897   17644
   6   7   4   66446   36158
   7   7   4   27632   32598
   8   7   4  246733   42264
   9   7   4   -8112   55546
  10   7   4 1021046  136955
  11   7   4   39679   60951
  12   7   4  379198  174992
  13   7   4   29641  162514
  -5   8   4  112210   38439
  -4   8   4  921150   58364
  -3   8   4  130647   24786
  -2   8   4  116239   21141
  -1   8   4  557804   34516
   0   8   4  138955   24172
   1   8   4   -2397   23525
   2   8   4  452853   24447
   3   8   4   14386   19563
   4   8   4 1372090   38754
   5   8   4  289466   22635
   6   8   4 1470408   44198
   7   8   4  354448   39111
   8   8   4  857966   55227
   9   8   4   -4672   54138
  10   8   4   68652  139369
  11   8   4  -13333   64110
  12   8   4   63509   80310
  13   8   4   25592  235469
  -7   9   4  205264   46489
  -6   9   4  120351   40854
  -5   9   4   67452   26091
  -4   9   4 1231778   59270
  -3   9   4  291417   29232
  -2   9   4  657241   32016
  -1   9   4  129276   21107
   0   9   4 1551025   46741
   1   9   4 1243380   45792
   2   9   4 1527630   39029
   3   9   4 1439571   39070
   4   9   4 1066762   48773
   5   9   4    -892   25970
   6   9   4   44403   39748
   7   9   4  168589   56553
   8   9   4  537734   80100
   9   9   4  115773   49563
  10   9   4  926562   66240
  11   9   4  100562   68165
  12   9   4  684496  145709
  13   9   4 -206086  206086
  -7  10   4 1031437   80703
  -6  10   4  771818   73659
  -5  10   4 1970011   63396
  -4  10   4  451507   34341
  -3  10   4   15679   24192
  -2  10   4   15360   19160
  -1  10   4  130378   22332
   0  10   4   19663   26583
   1  10   4  205132   23735
   2  10   4  164916   19911
   3  10   4  851253   43707
   4  10   4  992279   34448
   5  10   4 1285470   49004
   6  10   4  662552   46314
   7  10   4 1431650  166035
   8  10   4  558687   78289
   9  10   4  571965   95395
  10  10   4  -89157   92979
  11  10   4  -27572  110288
  12  10   4 -138464  138464
 -10  11   4  167209   81910
  -9  11   4 1162420  109482
  -8  11   4  339581   63194
  -7  11   4  455188   49107
  -6  11   4   71307   32944
  -5  11   4  131507   30950
  -4  11   4  469300   37569
  -3  11   4  178220   22327
  -2  11   4  671891   35136
  -1  11   4 1134398   37913
   0  11   4 1404979   41386
   1  11   4 1962585   44895
   2  11   4  333037   50510
   3  11   4  693018   32829
   4  11   4   32077   21408
   5  11   4  118016   25019
   6  11   4   55353   31445
   7  11   4  -29389  101433
   8  11   4  180275   76276
   9  11   4  434973   92175
  10  11   4   75404   98011
  11  11   4  568041  128402
  12  11   4 -143696  143696
 -10  12   4   90957   85534
  -9  12   4  686206   89559
  -8  12   4   35452   62992
  -7  12   4 1914597   70496
  -6  12   4   58006   35964
  -5  12   4 1485865   61383
  -4  12   4   27591   28757
  -3  12   4  357552   26820
  -2  12   4  712733   37032
  -1  12   4  439218   28988
   0  12   4  100880   23730
   1  12   4  507846   29564
   2  12   4  120776   25466
   3  12   4 1017040   36460
   4  12   4  -17867   22717
   5  12   4 2018623   47089
   6  12   4  150379   45979
   7  12   4 1357675  115923
   8  12   4   56190   80100
   9  12   4  294106   95596
  10  12   4  -91169  105860
  11  12   4   91285  130817
  12  12   4  -89559  155168
 -13  13   4  158515  159394
 -12  13   4  118049  128402
 -11  13   4  611499  119344
 -10  13   4  155451   93383
  -9  13   4  493772   90766
  -8  13   4   61686   69835
  -7  13   4  294498   47076
  -6  13   4  -35075   36327
  -5  13   4  150431   37439
  -4  13   4  -30160   30160
  -3  13   4  710521   36685
  -2  13   4  412320   30267
  -1  13   4   37221   23385
   0  13   4 1147515   43698
   1  13   4 1438923   46323
   2  13   4   29401   32179
   3  13   4  767857   41395
   4  13   4   11176   24369
   5  13   4  269222   31385
   6  13   4   28807   37273
   7  13   4  108001  129106
   8  13   4  132161   84528
   9  13   4  459066   99822
  10  13   4  264580  116930
  11  13   4  419710  145507
 -14  14   4   23249  211117
 -13  14   4   -6038  172073
 -12  14   4   41884  134439
 -11  14   4  -95797  111093
 -10  14   4  184093  103445
  -9  14   4  -10666   87345
  -8  14   4  708560   89759
  -7  14   4  772434   58594
  -6  14   4  839450   61091
  -5  14   4  530316   65509
  -4  14   4  233647   74465
  -3  14   4    6100   29377
  -2  14   4  640666   36700
  -1  14   4   68408   24213
   0  14   4  119823   26813
   1  14   4  381899   32117
   2  14   4  377455   32910
   3  14   4  825158   39886
   4  14   4  456648   33676
   5  14   4   82484   30492
   6  14   4  394327   41957
   7  14   4  634133  116628
   8  14   4  562108   98011
   9  14   4  168823  109885
  10  14   4 -104251  118741
  11  14   4   81208  152955
 -13  15   4  461327  188577
 -12  15   4  606079  159595
 -11  15   4   60782  127797
 -10  15   4  775320  121759
  -9  15   4  -94188   94188
  -8  15   4  687725  100828
  -7  15   4   48261   49370
  -6  15   4   77276   46220
  -5  15   4  249328   44632
  -4  15   4  698487   54361
  -3  15   4   31182   29110
  -2  15   4 1406559   51557
  -1  15   4  153304   30273
   0  15   4 2537799   58969
   1  15   4   57727   30339
   2  15   4 1044099   53400
   3  15   4  162008   29836
   4  15   4  271841   33479
   5  15   4   70429   33230
   6  15   4   72195   36251
   7  15   4   25226   65509
   8  15   4  343014  104653
   9  15   4   86378  116125
  10  15   4  428547  135243
  11  15   4  243604  166640
 -13  16   4  320248  219972
 -12  16   4  133003  166238
 -11  16   4 -136251  136251
 -10  16   4  362737  121156
  -9  16   4 -106867  106867
  -8  16   4  670183  108477
  -7  16   4  -30505   54146
  -6  16   4 1828860   85850
  -5  16   4   13891   45305
  -4  16   4  342275   49482
  -3  16   4  153947   32855
  -2  16   4  122742   32669
  -1  16   4   61857   41064
   0  16   4   31514   32207
   1  16   4   20770   41908
   2  16   4  758692   46411
   3  16   4   23209   29295
   4  16   4  877945   51715
   5  16   4  163150   36929
   6  16   4  840908   46689
   7  16   4   37131   89961
   8  16   4  479070  115520
   9  16   4   39244  127193
  10  16   4  214813  148527
 -12  17   4  614755  189784
 -11  17   4  142457  149532
 -10  17   4  -15899  124376
  -9  17   4 -101030  110288
  -8  17   4  159361  103043
  -7  17   4  -16438   57258
  -6  17   4   22605   53766
  -5  17   4  -33276   56653
  -4  17   4  192940   37913
  -3  17   4   54014   33994
  -2  17   4  854552   54165
  -1  17   4  191297   35860
   0  17   4 1161780   59226
   1  17   4  125155   38105
   2  17   4 1136918   64109
   3  17   4  136802   59671
   4  17   4  526206   47544
   5  17   4   17502   37963
   6  17   4   12758   41030
   7  17   4   53895   70511
   8  17   4  343758  119545
   9  17   4   91169  135847
  10  17   4  311237  150540
 -12  18   4  189540  200250
 -11  18   4 -123168  164628
 -10  18   4 -135043  135043
  -9  18   4  358569  127797
  -8  18   4  471341  120150
  -7  18   4 1032445  120553
  -6  18   4 1323937  142791
  -5  18   4 1563958   90917
  -4  18   4  714321   52245
  -3  18   4  628704   45676
  -2  18   4   72035   38404
  -1  18   4   61525   38904
   0  18   4    9575   39305
   1  18   4  -20403   65396
   2  18   4   -6240   41085
   3  18   4  599185  123068
   4  18   4  178863   45766
   5  18   4  254972   43550
   6  18   4  376794   57784
   7  18   4  219458   79647
   8  18   4  105195  122163
   9  18   4   47096  148728
 -11  19   4  242296  189784
 -10  19   4  -65207  147520
  -9  19   4 -125181  133432
  -8  19   4 -119746  119746
  -7  19   4   33300  111495
  -6  19   4  -49007   63554
  -5  19   4   93580   59954
  -4  19   4    4708   41414
  -3  19   4  680550   59083
  -2  19   4   47732   52650
  -1  19   4 1129244  119747
   0  19   4   14208   43185
   1  19   4 1390769  111076
   2  19   4   97641   59515
   3  19   4  549279   70922
   4  19   4  -47976   47976
   5  19   4  132706   52142
   6  19   4  -11059   48442
   7  19   4  195499   85788
   8  19   4  -97810  138263
   9  19   4  347873  153156
 -10  20   4 -168653  168653
  -9  20   4  413783  157381
  -8  20   4 -133231  133231
  -7  20   4 1073213  138867
  -6  20   4   29209   86440
  -5  20   4  961525   79764
  -4  20   4  118449   63386
  -3  20   4  717220   63583
  -2  20   4   23492   55628
  -1  20   4  -12816   55991
   0  20   4   34100   48126
   1  20   4  178038  134039
   2  20   4  -60834   60834
   3  20   4  252508  207595
   4  20   4   78053   65434
   5  20   4  320056   52828
   6  20   4   66371   54327
   7  20   4  695796   99803
   8  20   4 -150540  150540
 -10  21   4   50717  179118
  -9  21   4  358817  168452
  -8  21   4   16994  146515
  -7  21   4   58749  138061
  -6  21   4   24425  125583
  -5  21   4  -17599   72911
  -4  21   4  142036   52784
  -3  21   4  214231   90263
  -2  21   4  160738   67621
  -1  21   4  909476  108477
   0  21   4  240872   95998
   1  21   4  872848  111093
   2  21   4   88891   68264
   3  21   4  396378  109482
   4  21   4  -19541   87288
   5  21   4  -34201   62402
   6  21   4   34255   66870
   7  21   4   21047  103543
  -9  22   4  209446  184148
  -8  22   4  477913  169859
  -7  22   4  495150  157985
  -6  22   4  352937  142086
  -5  22   4  318533   86346
  -4  22   4  274286   64602
  -3  22   4  268196   63945
  -2  22   4   34050  105357
  -1  22   4  -69055   69055
   0  22   4  -35008   64890
   1  22   4   30333   59435
   2  22   4  224279   65115
   3  22   4  174196   67248
   4  22   4  251918   58508
   5  22   4   77958   67847
   6  22   4  297509  103788
   7  22   4   88858  146917
  -8  23   4  328926  186565
  -7  23   4  -30992  170464
  -6  23   4 -148125  148125
  -5  23   4   36660   90534
  -4  23   4  163708   65736
  -3  23   4  106208   68239
  -2  23   4  448125   87032
  -1  23   4   20355   91951
   0  23   4  992411   75858
   1  23   4   96955  141736
   2  23   4  357319   71339
   3  23   4   45948   84578
   4  23   4  109766   67040
   5  23   4   32919   67601
   6  23   4  -80727   80727
  -7  24   4 -157784  186161
  -6  24   4  734183  188577
  -5  24   4   86870  159796
  -4  24   4  566024  100955
  -3  24   4   30495   92565
  -2  24   4  196044  104278
  -1  24   4    7969  128144
   0  24   4   -3402   71565
   1  24   4  100109   76071
   2  24   4  387567   83153
   3  24   4   60088   82016
   4  24   4  973678   77705
   5  24   4  -74038   74038
   6  24   4  439745  114991
  -5  25   4 -100828  177106
  -4  25   4   95442  242613
  -3  25   4  100940   80161
  -2  25   4  424187   84664
  -1  25   4  271958   83120
   0  25   4  800831   87190
   1  25   4  281407   86857
   2  25   4  221273   86630
   3  25   4   81474   91650
   4  25   4  161787   77297
   5  25   4    5382   90846
   6  25   4  -14088  114604
  -4  26   4  139682  112869
  -3  26   4  310418   94090
  -2  26   4   68809   90113
  -1  26   4  115296  108464
   0  26   4   58546   90590
   1  26   4  248998   95757
   2  26   4   29226   99478
   3  26   4  229287  104384
   4  26   4  173519   96197
   5  26   4  336020  158288
   6  26   4  161725  156879
  -4  27   4 -161809  161809
  -3  27   4  267191  177910
  -2  27   4   82285  166841
  -1  27   4  446541  101384
   0  27   4   10991  144606
   1  27   4  461552  106693
   2  27   4   58194  139268
   3  27   4   80584  156257
   4  27   4  169634  128069
   5  27   4   32594  216451
   6  27   4  119107  215142
  -5  28   4  -68226  178313
  -4  28   4   -9458  183746
  -3  28   4   74319  196023
  -2  28   4    6031  192401
  -1  28   4   27675  196627
   0  28   4    6863  134668
   1  28   4 -131018  188778
   3  28   4  165403  134347
   4  28   4   16535  136603
   5  28   4  433375  157381
  -4  29   4  104921  212325
  -3  29   4  144966  217558
  -2  29   4  -64201  225407
   3  29   4  126801  182741
   4  29   4  -80503  196225
  -1   0   5  573132   19771
   1   0   5   53395   13891
   3   0   5 6856860   69944
   5   0   5 3665735   60778
   7   0   5 1804153   78891
   9   0   5  388678   65408
  11   0   5  172073   84125
  13   0   5  402426  140477
  -1   1   5 2602302   24524
   0   1   5  946788   17211
   1   1   5  215662   11215
   2   1   5  185458   13535
   3   1   5   51897   14552
   4   1   5  555227   25125
   5   1   5  136317   17708
   6   1   5  113358   26155
   7   1   5  210950   56151
   8   1   5   54528   44980
   9   1   5 1266207   69567
  10   1   5  402086   56042
  11   1   5  797304   68766
  12   1   5   76703   74879
  13   1   5  201819   96709
  -1   2   5  243193   14867
   0   2   5  198431   11041
   1   2   5 3029907   35642
   2   2   5 4133455   40029
   3   2   5 1088166   26632
   4   2   5 1918463   31998
   5   2   5 1018254   29351
   6   2   5 1489217   34195
   7   2   5 1227621   51990
   8   2   5  454433   42011
   9   2   5  264409   83017
  10   2   5   23889   48526
  11   2   5   29909   60464
  12   2   5  228614   79094
  13   2   5   -4779   95959
  -1   3   5   68394   16502
   0   3   5 5121596   41113
   1   3   5    4815    9813
   2   3   5 1059117   23766
   3   3   5    8693   14400
   4   3   5   20529   15163
   5   3   5  151716   18077
   6   3   5   74378   26295
   7   3   5  254910   58766
   8   3   5  887971   57002
   9   3   5   51447   43667
  10   3   5 1020329   66528
  11   3   5  185643   63902
  12   3   5  519500   81979
  13   3   5   47355  233659
  -2   4   5  145416   20327
  -1   4   5 1184845   27008
   0   4   5  420054   30808
   1   4   5  347612   19669
   2   4   5 3314237   34851
   3   4   5  772779   26627
   4   4   5 3376255   58034
   5   4   5   94045   17921
   6   4   5 1191825   71345
   7   4   5  187941   46289
   8   4   5 1311973  101835
   9   4   5  227963   66715
  10   4   5   23380   51195
  11   4   5  125486   61055
  12   4   5  168738   79953
  13   4   5   81679  101311
  -2   5   5 7981020   91973
  -1   5   5 2504437   37533
   0   5   5 4336623   53434
   1   5   5   32223   14597
   2   5   5 1953491   48057
   3   5   5 2057459   32833
   4   5   5   -1613   16144
   5   5   5   53269   18016
   6   5   5   11617   21988
   7   5   5  148712   60578
   8   5   5  527216   47752
   9   5   5   86924   74364
  10   5   5  404134   65408
  11   5   5  120669   84628
  12   5   5  363475   84821
  13   5   5   40087  288097
  -3   6   5   20968   25358
  -2   6   5  297822   31395
  -1   6   5   40592   27572
   0   6   5  124197   35220
   1   6   5   24732   16238
   2   6   5  630297   30338
   3   6   5  238195   17730
   4   6   5 1472359   51039
   5   6   5 1948848   37455
   6   6   5 1027548  117734
   7   6   5  125686   34013
   8   6   5  449047  108175
   9   6   5  119664   47079
  10   6   5   75286   55565
  11   6   5   66455   64610
  12   6   5  133943   81298
  13   6   5   92078  104336
  -3   7   5 7213428   99017
  -2   7   5  424609   29964
  -1   7   5  352781   28376
   0   7   5  107725   22138
   1   7   5 3026612   44141
   2   7   5  107563   20836
   3   7   5  637459   32508
   4   7   5  -16355   20474
   5   7   5   37789   19055
   6   7   5  128690   26772
   7   7   5  861845   95696
   8   7   5   89138   40442
   9   7   5  570389   56877
  10   7   5   64057   69232
  11   7   5  225272   69371
  12   7   5   35828  168150
  13   7   5 -141683  142489
  -4   8   5   10184   30792
  -3   8   5  718865   53132
  -2   8   5   26224   20530
  -1   8   5  536070   50213
   0   8   5  732925   38995
   1   8   5  571043   73659
   2   8   5  270503   23394
   3   8   5 2720828   47301
   4   8   5  321225   47041
   5   8   5  916666   40501
   6   8   5   90164   23888
   7   8   5  260609   40608
   8   8   5   29466   42189
   9   8   5  178085   51716
  10   8   5  -57623   57623
  11   8   5   51541   71640
  12   8   5   57627  109986
  13   8   5  351657  167243
  -6   9   5  250883   44879
  -5   9   5 3298960   59077
  -4   9   5  836328   70440
  -3   9   5  464043   42867
  -2   9   5  605819   35876
  -1   9   5 5891223   71338
   0   9   5  101330   51320
   1   9   5 1356357   47217
   2   9   5  391649   24341
   3   9   5  484779   27882
   4   9   5   67584   22655
   5   9   5  223089   29370
   6   9   5  261091   33267
   7   9   5  688577  207494
   8   9   5  204406   70238
   9   9   5  389245   55097
  10   9   5   56986   58570
  11   9   5  618278  103344
  12   9   5  -76477  146111
  -8  10   5  951698   85935
  -7  10   5  480991   59371
  -6  10   5  320803   51722
  -5  10   5  518281   36980
  -4  10   5 2908414   59871
  -3  10   5  392014   33670
  -2  10   5  914495   34914
  -1  10   5  215747   29082
   0  10   5  162269   47195
   1  10   5   28473   25477
   2  10   5 1775191   42680
   3  10   5 1349069   53307
   4  10   5 1531617   39301
   5  10   5  557218   30516
   6  10   5 1174825   42986
   7  10   5  766244   83923
   8  10   5  232368   77080
   9  10   5   12875   82715
  10  10   5  -95998   95998
  11  10   5   92770  122565
  12  10   5  209381  157181
  -8  11   5  -42063   53734
  -7  11   5  312156   58766
  -6  11   5  567689   42607
  -5  11   5  169880   69936
  -4  11   5 1672688   85130
  -3  11   5  286323   23644
  -2  11   5 5480401   61909
  -1  11   5  296709   26145
   0  11   5 4844308   61019
   1  11   5  241031   24647
   2  11   5   50637   20347
   3  11   5  197980   23994
   4  11   5   28051   23491
   5  11   5  -24682   24682
   6  11   5  570524  102339
   7  11   5   44789   67017
   8  11   5  471543   86942
   9  11   5   32368   88150
  10  11   5  510393  110490
  11  11   5  157344  127998
  12  11   5  278560  181131
 -10  12   5  702787  100226
  -9  12   5    -200   75069
  -8  12   5 1558930  104048
  -7  12   5   95609   59169
  -6  12   5  744187   58839
  -5  12   5  450561   39704
  -4  12   5  599831   42966
  -3  12   5  -12018   25982
  -2  12   5   23199   21761
  -1  12   5  239896   25291
   0  12   5  826912   39692
   1  12   5  643131   35773
   2  12   5  620077   31080
   3  12   5   89380   22850
   4  12   5  958275   40255
   5  12   5  -12737   28892
   6  12   5 3141716   84032
   7  12   5   21872   58565
   8  12   5  474964   95998
   9  12   5  -51923   96603
  10  12   5  133752  116930
  11  12   5  -50717  132225
 -11  13   5  127794  109281
  -9  13   5  -77684   77684
  -8  13   5   45094   70238
  -7  13   5   64400   42030
  -6  13   5  672229   59671
  -5  13   5  240355   38280
  -4  13   5 1877806   63446
  -3  13   5  440710   29557
  -2  13   5 2109740   48461
  -1  13   5 1122284   42770
   0  13   5 1562278   47825
   1  13   5  252489   28116
   2  13   5  102371   28169
   3  13   5   13185   23936
   4  13   5    5704   34654
   5  13   5  107236   30285
   6  13   5  412312   36726
   7  13   5  260067   57810
   8  13   5  670227   96603
   9  13   5  158389  107068
  10  13   5  421147  129407
  11  13   5  264455  149734
 -14  14   5 -206287  206287
 -13  14   5   27917  166439
 -12  14   5 -106061  135243
 -11  14   5  367213  124980
 -10  14   5  324645  104048
  -9  14   5  536670  100427
  -8  14   5  438447   57853
  -7  14   5 1555535   79473
  -6  14   5  364114   49325
  -5  14   5   77999   91370
  -4  14   5  132115   39485
  -3  14   5   63659   29897
  -2  14   5  262881   29373
  -1  14   5  134080   28516
   0  14   5  848016   43416
   1  14   5  760718   43410
   2  14   5  351755   35341
   3  14   5  211283   28861
   4  14   5  605104   54941
   5  14   5  548929   37983
   6  14   5  169806   40692
   7  14   5  304008  126691
   8  14   5  -20728   91169
   9  14   5 -112502  112502
  10  14   5   71786  132829
  11  14   5  122154  172073
 -13  15   5  560651  188980
 -12  15   5 -137457  145507
 -11  15   5  356265  132628
 -10  15   5  124004  113306
  -9  15   5  338272   97609
  -8  15   5   19420   57760
  -7  15   5   40294   54036
  -6  15   5  -13978   44029
  -5  15   5  994775   72378
  -4  15   5  -10127   39483
  -3  15   5 1529260   51384
  -2  15   5  242797   31736
  -1  15   5 1515807   73657
   0  15   5   14910   29619
   1  15   5  391628   36483
   2  15   5  145501   34298
   3  15   5  -12896   28133
   4  15   5   95572   30920
   5  15   5  269603   37136
   6  15   5   36601   37769
   7  15   5  200531   66070
   8  15   5  110789  106867
   9  15   5  360754  131822
  10  15   5 -127193  142489
 -13  16   5 -148125  199645
 -12  16   5   59599  168452
 -11  16   5   73380  139068
 -10  16   5  -94590  115520
  -9  16   5  769625  117533
  -8  16   5  112383   60050
  -7  16   5 1906991   92878
  -6  16   5   17644   48685
  -5  16   5  934538   96402
  -4  16   5   89407   46788
  -3  16   5  535733   39383
  -2  16   5   33723   30826
  -1  16   5    1812   47288
   0  16   5   56404   36282
   1  16   5  774160   45245
   2  16   5    3552   72441
   3  16   5  954303   54979
   4  16   5   -1127   39941
   5  16   5 1412300   67047
   6  16   5  -48541   48541
   7  16   5  211656   71615
   8  16   5   54614  118540
   9  16   5  -34011  127998
  10  16   5   53883  150741
 -13  17   5  393840  223997
 -12  17   5  -30188  176098
 -11  17   5  469936  155369
 -10  17   5   -5233  127595
  -9  17   5  123422  118741
  -8  17   5   -8472   65079
  -7  17   5  164233   84125
  -6  17   5   54821   62289
  -5  17   5  385885   58363
  -4  17   5 1593229  167243
  -3  17   5  445739   43097
  -2  17   5  812581   76015
  -1  17   5  995418   61635
   0  17   5  573404   43452
   1  17   5  489039   58729
   2  17   5   65999   40979
   3  17   5   57297   41861
   4  17   5   67451   42923
   5  17   5   33995   54417
   6  17   5   63207   46914
   7  17   5  138929   78305
   8  17   5  222596   86683
   9  17   5  297172  137860
 -12  18   5  103010  204275
 -11  18   5 -149935  165432
 -10  18   5  292356  142892
  -9  18   5  213957  124779
  -8  18   5  530545  124578
  -7  18   5  434439   70186
  -6  18   5 1430511   95220
  -5  18   5   34071   58226
  -4  18   5  240567   40776
  -3  18   5  931150   59979
  -2  18   5   35903   40160
  -1  18   5  -31830   45886
   0  18   5  128165   41707
   1  18   5  722799   50507
   2  18   5  649306   51991
   3  18   5  107741   45147
   4  18   5  958442   59973
   5  18   5  460024   48376
   6  18   5  412285   51397
   7  18   5  137550   84076
   8  18   5  133800   91734
   9  18   5 -145106  147520
 -11  19   5   68019  186363
 -10  19   5  227419  160200
  -9  19   5  118928  135043
  -8  19   5  -87345  120351
  -7  19   5   64186   68859
  -6  19   5  175454   67746
  -5  19   5   80693  119545
  -4  19   5 1039342   59396
  -3  19   5   41429   42425
  -2  19   5 2326144  136552
  -1  19   5  195626   56653
   0  19   5  533759   53523
   1  19   5  -10811   51170
   2  19   5  543675  155268
   3  19   5  -48920   48920
   4  19   5   17749   68265
   5  19   5   -6513   46870
   6  19   5  224362   53482
   7  19   5   56769   87428
   8  19   5  331691  206790
 -11  20   5   41311  196829
 -10  20   5  360096  184148
  -9  20   5   97723  153356
  -8  20   5  662804  144905
  -7  20   5   74704   78046
  -6  20   5 1148694  119043
  -5  20   5  -18642   66480
  -4  20   5  595370   60541
  -3  20   5   31931   47951
  -2  20   5  -25100   55835
  -1  20   5   51456   57107
   0  20   5   60476   56209
   1  20   5  211603   90967
   2  20   5  666620  105659
   3  20   5   49800   64076
   4  20   5  314294   69244
   5  20   5   97321   55829
   6  20   5  597566  145156
   7  20   5   14506  135646
   8  20   5 -179520  179520
 -10  21   5  280570  192804
  -9  21   5    2030  166238
  -8  21   5   65892  155369
  -7  21   5   40955   86751
  -6  21   5  -18692   79522
  -5  21   5  382926   80071
  -4  21   5  496922   56064
  -3  21   5  199869   64234
  -2  21   5  765750   73701
  -1  21   5  -73836  138061
   0  21   5  749132   90908
   1  21   5   83150  149030
   2  21   5  -64759   70228
   3  21   5   60125   58444
   4  21   5   86362   62309
   5  21   5  -13147   64922
   6  21   5  211966   72604
   7  21   5   77013  172477
   8  21   5  292230  170061
  -9  22   5  250538  186967
  -8  22   5  385205  170464
  -7  22   5  184804  152754
  -6  22   5  230418   89400
  -5  22   5  427729   89459
  -4  22   5   26883   74764
  -3  22   5  447593   70077
  -2  22   5   -2571   67365
  -1  22   5  147295   78563
   0  22   5   11491   59894
   1  22   5  129536   64482
   2  22   5  211115   67367
   3  22   5  602032   61475
   4  22   5  384408   61129
   5  22   5  312570   66594
   6  22   5   49766   69092
   7  22   5  211071  178111
   8  22   5  -44075  184148
  -8  23   5  -29382  178313
  -7  23   5  -54138  169457
  -6  23   5   74432   98017
  -5  23   5  323881   92490
  -4  23   5   95846   89309
  -3  23   5  190840   90019
  -2  23   5 -102540  102540
  -1  23   5 1259823   77413
   0  23   5   59629   68946
   1  23   5  265270   71210
   2  23   5   12944   72236
   3  23   5   19922   62115
   4  23   5   50488   64645
   5  23   5  -23800  119115
   6  23   5   64512   87194
   7  23   5  353356  187771
  -7  24   5  611375  192804
  -6  24   5 -111696  180123
  -5  24   5  526130  173482
  -4  24   5   13220   77700
  -3  24   5  -69090  138263
  -2  24   5   -3486  111033
  -1  24   5  -44604   70459
   0  24   5   -3808   76985
   1  24   5  379079   79420
   2  24   5  -12720   80935
   3  24   5  501385  111228
   4  24   5  -52233   87176
   5  24   5  495577   90790
   6  24   5  -50077   98422
   7  24   5  411098  215142
  -5  25   5  124796  115804
  -4  25   5  282039  117533
  -3  25   5  549970   84410
  -2  25   5  186379   82725
  -1  25   5  320216   81789
   0  25   5  123007   82790
   1  25   5  174447   86319
   2  25   5  118610   96015
   3  25   5   77090  104197
   4  25   5   78755   98921
   5  25   5  -40476  101520
   6  25   5   83763  147008
  -4  26   5  198825  107840
  -3  26   5   41102   91171
  -2  26   5  -88692   88692
  -1  26   5  -37227  101039
   0  26   5   57618   93547
   1  26   5   78922   98003
   2  26   5  408582  104958
   3  26   5  237993   95347
   4  26   5  420125  104583
   5  26   5  101052  109952
   6  26   5  396402  138769
  -5  27   5   66373  161005
  -4  27   5  282050  170061
  -3  27   5   29506  239796
  -2  27   5  423687  120239
  -1  27   5  158533  123821
   0  27   5  543972  109975
   1  27   5   -7319  149218
   2  27   5  254353  190590
   3  27   5   83627  107357
   4  27   5 -107967  107967
   5  27   5 -118922  118922
   6  27   5  169599  189381
  -5  28   5   46657  184148
  -4  28   5  -39445  185356
  -3  28   5  181586  199243
  -2  28   5   -6299  132915
  -1  28   5 -102617  135656
   0  28   5 -131419  194816
   1  28   5   37835  190791
   2  28   5  269077  186766
   3  28   5  -90565  180527
   4  28   5  366972  181733
   5  28   5   -6843  194414
  -4  29   5  164688  211318
  -3  29   5   61364  221583
  -2  29   5  219344  221986
  -3  30   5 -112100  222790
   0   0   6 2214008   34510
   2   0   6 7048777   71221
   4   0   6 3493448   57885
   6   0   6  606183   41357
   8   0   6  -38641   51521
  10   0   6  160488   78690
  12   0   6  264508  124779
  -1   1   6  845262   18527
   0   1   6  264128   12215
   1   1   6   94103   11936
   2   1   6  785602   24228
   3   1   6 1583117   30373
   4   1   6   76185   16892
   5   1   6   43494   17722
   6   1   6  635022   31920
   7   1   6  253444   63797
   8   1   6  913263   62189
   9   1   6  404675  123872
  10   1   6 1007271   75509
  11   1   6   53108   64819
  12   1   6   99085   85784
  13   1   6  161169  120854
  -2   2   6  290012   28376
  -1   2   6   13597   10380
   0   2   6  159309   11473
   1   2   6 1250762   23061
   2   2   6  391892   18816
   3   2   6 2947737   37433
   4   2   6 1979723   36136
   5   2   6  750222   29972
   6   2   6  820351   32772
   7   2   6  296081   37707
   8   2   6   93798   39183
   9   2   6  170572   51722
  10   2   6  102769   55708
  11   2   6  201054   68150
  12   2   6  112703   86553
  13   2   6  187459  104690
  -2   3   6 1069676   36426
  -1   3   6  939519   21230
   0   3   6  347256   21403
   1   3   6  440170   19786
   2   3   6  245361   17074
   3   3   6   28998   15735
   4   3   6  340279   20424
   5   3   6   41698   18580
   6   3   6  197253   21986
   7   3   6  529260   42854
   8   3   6  232787   41663
   9   3   6  996608   66572
  10   3   6  111929   76477
  11   3   6  609666   75326
  12   3   6   64815   85557
  13   3   6   55016  184552
  -2   4   6  136188   23747
  -1   4   6 2452625   40955
   0   4   6  919328   24780
   1   4   6 6242275   54403
   2   4   6  387552   21486
   3   4   6 1883294   36050
   4   4   6   -4350   16339
   5   4   6 1872952   37473
   6   4   6   48570   25052
   7   4   6  768360   46298
   8   4   6  -30322   43673
   9   4   6   26098   47555
  10   4   6  104408   65810
  11   4   6  175668   70351
  12   4   6   36040   88969
  13   4   6  232652  167645
  -2   5   6  307317   29382
  -1   5   6   39392   16558
   0   5   6   39563   15052
   1   5   6 2209215   36689
   2   5   6   29489   15353
   3   5   6  110520   16872
   4   5   6   15328   16244
   5   5   6  364861   22717
   6   5   6   12647   21463
   7   5   6 1568837   64071
   8   5   6  174942   43607
   9   5   6  914436   63467
  10   5   6   67067   78188
  11   5   6  349574   76104
  12   5   6   52731   87971
  -3   6   6 1465145   52528
  -2   6   6  506448   29495
  -1   6   6 1227516   35961
   0   6   6  785088   43169
   1   6   6  963087   31885
   2   6   6 1016588   34270
   3   6   6 1216691   30389
   4   6   6  367483   21619
   5   6   6  499104   26320
   6   6   6  335860   26692
   7   6   6   27793   30858
   8   6   6  140566   44692
   9   6   6  -16317   57157
  10   6   6   99321   58827
  11   6   6   41435   79696
  12   6   6  233947  150136
  -3   7   6  704024   50514
  -2   7   6 2712934   70238
  -1   7   6  332343   48401
   0   7   6  185828   24986
   1   7   6   14802   18386
   2   7   6  566077   32451
   3   7   6  -12300   20614
   4   7   6  813061   30539
   5   7   6  136417   24982
   6   7   6 1392299   41048
   7   7   6   36967   32244
   8   7   6  940920   64561
   9   7   6  131564   54759
  10   7   6  359927   64615
  11   7   6   72059   73740
  12   7   6  -10247   94989
  -3   8   6   -9862   30188
  -2   8   6 2100407   45242
  -1   8   6    3081   27170
   0   8   6 3671350  116930
   1   8   6  512729   29345
   2   8   6 2431990   44350
   3   8   6   78886   21399
   4   8   6 1609212   43023
   5   8   6  -16841   26026
   6   8   6  158725   26530
   7   8   6   36702   40119
   8   8   6   51305   44857
   9   8   6   21541   53526
  10   8   6  128911   64289
  11   8   6  -64264   74629
  12   8   6  466105  140980
  -6   9   6  466058   48904
  -5   9   6  168911   44276
  -4   9   6 3862712   84528
  -3   9   6  868823   59169
  -2   9   6 3706787   56476
  -1   9   6   96183   24611
   0   9   6 1880836   57358
   1   9   6  582883   28239
   2   9   6   78545   21685
   3   9   6   -3945   21708
   4   9   6   36114   27825
   5   9   6  697155   41520
   6   9   6  267722   37039
   7   9   6   50435   47148
   8   9   6 1135535   76078
   9   9   6  241885   63797
  10   9   6  460581   85534
  11   9   6  176655   90565
  12   9   6  102799  143495
  -7  10   6 1132959   81709
  -6  10   6  209639   49508
  -5  10   6  563512   36702
  -4  10   6  258160   31861
  -3  10   6   -1811   37433
  -2  10   6  -15967   22869
  -1  10   6 1343780   47354
   0  10   6 1062144   47495
   1  10   6  953514   46264
   2  10   6 1520650   41595
   3  10   6 1243965   70538
   4  10   6  306868   31341
   5  10   6  342754   34360
   6  10   6  341049   45113
   7  10   6   94413   46532
   8  10   6   85054   80301
   9  10   6   -7445   90565
  10  10   6   63405  107671
  11  10   6  136289  138867
  -6  11   6  363267   56553
  -5  11   6 1843615   58275
  -4  11   6  160788   36527
  -3  11   6 1364316   52882
  -2  11   6 1545405   48451
  -1  11   6 2125494   54013
   0  11   6   37432   62389
   1  11   6  145869   30088
   2  11   6   94514   23889
   3  11   6    5751   25003
   4  11   6  -24422   24422
   5  11   6 1382819   46689
   6  11   6   98217   30507
   7  11   6 2150900   86576
   8  11   6   61660   84125
   9  11   6  983818  112704
  10  11   6   35892  115520
  11  11   6  594291  151545
  -9  12   6 1295748  119143
  -7  12   6 1738237  100828
  -6  12   6   41182   35648
  -5  12   6  719027   44470
  -4  12   6  127475   76678
  -3  12   6  230035   35882
  -2  12   6   15588   32277
  -1  12   6  564011   29670
   0  12   6   76552   24685
   1  12   6 2065083   59220
   2  12   6  213351   24774
   3  12   6 1244262   42208
   4  12   6  133776   28289
   5  12   6  485551   43298
   6  12   6    6313   31961
   7  12   6   91958   53352
   8  12   6   76923   90163
   9  12   6  117046  107671
  10  12   6 -119948  119948
  11  12   6 -149532  149532
 -11  13   6  102633  105860
 -10  13   6  109590   95194
  -9  13   6  142096   83521
  -8  13   6   33765   83017
  -7  13   6  345134   46567
  -6  13   6   55969   41157
  -5  13   6 1271990   62142
  -4  13   6  123537   38839
  -3  13   6 2589572   68929
  -2  13   6 1662190   46605
  -1  13   6 1174581   52377
   0  13   6  576874   33260
   1  13   6   28682   26779
   2  13   6   13883   24394
   3  13   6  238740   29201
   4  13   6   82869   39594
   5  13   6  225706   33926
   6  13   6  393035   39819
   7  13   6  984034   58915
   8  13   6  161238  101232
   9  13   6  733491  122968
  10  13   6  106465  125583
 -11  14   6  442179  124980
 -10  14   6  534400  113306
  -9  14   6  741228  100828
  -8  14   6 1019199  117935
  -7  14   6  181969   73860
  -6  14   6   68175   43060
  -5  14   6  426102   48610
  -4  14   6  -26250   38741
  -3  14   6   -3279   25586
  -2  14   6  -11511   25667
  -1  14   6  855770   46167
   0  14   6  633276   40370
   1  14   6  463883   36217
   2  14   6 1148606   45176
   3  14   6  495612   34801
   4  14   6  558618   42801
   5  14   6 1055433  120843
   6  14   6  457745   47232
   7  14   6  -14875   45701
   8  14   6   58116  104855
   9  14   6   25572  116729
  10  14   6  221075  144301
 -13  15   6  222657  184552
 -12  15   6  532278  161407
 -11  15   6   55904  122364
 -10  15   6   43767  111093
  -9  15   6  -13992   82213
  -8  15   6   18785   51157
  -7  15   6   70953   49042
  -6  15   6  592299   59471
  -5  15   6  107889   45847
  -4  15   6  994145   69440
  -3  15   6   45750   39217
  -2  15   6 1924897   56057
  -1  15   6   85959   29677
   0  15   6  363156   36280
   1  15   6   98785   33302
   2  15   6  -28488   34332
   3  15   6  -18608   30050
   4  15   6  276448   42407
   5  15   6   -4927   35647
   6  15   6  225844   42942
   7  15   6   -8943   67580
   8  15   6  606989  119344
   9  15   6  -42264  126188
  10  15   6  670996  152351
 -13  16   6  158314  199444
 -12  16   6  349926  176098
 -11  16   6   24857  135043
 -10  16   6  422839  124578
  -9  16   6   33079   66683
  -8  16   6 1033836   73327
  -7  16   6   13098   54227
  -6  16   6  939615  119847
  -5  16   6  504027   73358
  -4  16   6  162259   34272
  -3  16   6  625506   44529
  -2  16   6  158828   34505
  -1  16   6   48172   33676
   0  16   6 1467936   61897
   1  16   6   10107   36282
   2  16   6  940774   66502
   3  16   6  352050   45057
   4  16   6 1902491   70210
   5  16   6   97866   48819
   6  16   6  202565   45138
   7  16   6    -382   63465
   8  16   6   10893   85009
   9  16   6    8435  142489
 -13  17   6   79898  221583
 -12  17   6  446851  193809
 -11  17   6   69043  151143
 -10  17   6   54673  132427
  -9  17   6  -22741  113709
  -8  17   6   76667   66390
  -7  17   6  204210  105056
  -6  17   6  408230  142288
  -5  17   6  683905   93784
  -4  17   6 1365842   98615
  -3  17   6  173541   36592
  -2  17   6 1125049   60332
  -1  17   6  780022   54872
   0  17   6  332442   42117
   1  17   6  304984   43660
   2  17   6  175796   43380
   3  17   6   43148   56467
   4  17   6   70035   49191
   5  17   6   34350   51771
   6  17   6  603492   53271
   7  17   6  284391   82465
   8  17   6  328537   93784
   9  17   6   -9659  145306
 -12  18   6   58536  211519
 -11  18   6  163704  170464
 -10  18   6  157100  142892
  -9  18   6  269855  128402
  -8  18   6  315537   74466
  -7  18   6  507791   76778
  -6  18   6  157360   61135
  -5  18   6  727841  120754
  -4  18   6  114060   38701
  -3  18   6  247569   63721
  -2  18   6  144039   47375
  -1  18   6  223554   51223
   0  18   6  534852   51733
   1  18   6  878604   54767
   2  18   6  202454   95163
   3  18   6 1367143  131078
   4  18   6  351006   54185
   5  18   6  807342   64879
   6  18   6  158394   52752
   7  18   6   77044   87520
   8  18   6 -111216  238086
 -12  19   6   84176  247947
 -11  19   6  251632  184955
 -10  19   6 -158389  158389
  -9  19   6  -59571  136048
  -8  19   6  -68246   76578
  -7  19   6  324070   73871
  -6  19   6  -64603   64603
  -5  19   6  306810   65709
  -4  19   6  548957  106766
  -3  19   6 1656656   81952
  -2  19   6  108255   50717
  -1  19   6  538472   59298
   0  19   6   84351   45973
   1  19   6  280628   73651
   2  19   6   45275  111897
   3  19   6   29428   53095
   4  19   6  -54936   54936
   5  19   6  240473   53579
   6  19   6   82286   56388
   7  19   6  658210  105022
   8  19   6   80509  107456
 -11  20   6  167717  198439
 -10  20   6   16760  170665
  -9  20   6  632271  158590
  -8  20   6  -47888   83723
  -7  20   6  457258   83823
  -6  20   6   52682   97005
  -5  20   6  326883  136351
  -4  20   6  186803   93816
  -3  20   6   41088   48789
  -2  20   6   44023   55108
  -1  20   6  371373   64090
   0  20   6   80271   58595
   1  20   6 1262078  118339
   2  20   6  154494   67635
   3  20   6 1257278   67984
   4  20   6   63503   58771
   5  20   6  552208   67728
   6  20   6   21813   69208
   7  20   6   73397   77960
   8  20   6  110019  156980
 -10  21   6 -158791  188376
  -9  21   6  212535  171671
  -8  21   6  147331  157784
  -7  21   6  149701  117031
  -6  21   6  116890  115520
  -5  21   6  437495   82446
  -4  21   6  178944   68336
  -3  21   6  399253   95452
  -2  21   6  282451   65470
  -1  21   6  494459  257407
   0  21   6  302104   74032
   1  21   6   76807   58817
   2  21   6  -30927   60372
   3  21   6   20207   75003
   4  21   6   17967   56400
   5  21   6   -6988   61186
   6  21   6  269007   68832
   7  21   6  318588  162816
   8  21   6  166164  186565
  -9  22   6  413171  190791
  -8  22   6  280278  171872
  -7  22   6  173898   95222
  -6  22   6   59342   88352
  -5  22   6  108814   85534
  -4  22   6   32322   57657
  -3  22   6   19076   81692
  -2  22   6  -15241  187670
  -1  22   6  -77650   77650
   0  22   6  458040   66963
   1  22   6   86259   63800
   2  22   6  302008  103517
   3  22   6  279941   60198
   4  22   6  426756   64826
   5  22   6   86397   94379
   6  22   6   87206   72828
   7  22   6  128292  122998
   8  22   6  166403  211318
  -8  23   6 -146716  185759
  -7  23   6  -67278  103036
  -6  23   6  480660  128905
  -5  23   6   83130  116326
  -4  23   6  703264   74123
  -3  23   6  101809   67379
  -2  23   6  912615   99115
  -1  23   6   59841  158952
   0  23   6  413677   71678
   1  23   6   98033   82534
   2  23   6  -51773   74953
   3  23   6   -2139   84765
   4  23   6   58904   69325
   5  23   6   59830   72940
   6  23   6  360696  101340
   7  23   6  187547  204879
   8  23   6  374028  225810
  -7  24   6  126718  187972
  -6  24   6  258012  121457
  -5  24   6  137134  102339
  -4  24   6    -827  122248
  -3  24   6  -63434   93614
  -2  24   6  -51542  128843
  -1  24   6  -14588   74146
   0  24   6  120046  106436
   1  24   6  -27022   77659
   2  24   6  578807   87984
   3  24   6   65027   71115
   4  24   6  555866   77363
   5  24   6   48322  110711
   6  24   6  181891  103944
   7  24   6  108753  221181
  -6  25   6  137108  150741
  -5  25   6  178682  139168
  -4  25   6  119173  110577
  -3  25   6  109673   84540
  -2  25   6  541370  118878
  -1  25   6  -65434   89471
   0  25   6   31192  137944
   1  25   6   96409   89188
   2  25   6   83276  105328
   3  25   6   74654   78125
   4  25   6  104748   94327
   5  25   6  107642  105989
   6  25   6  -69088  112081
   7  25   6 -233860  233860
  -5  26   6 -163018  163018
  -4  26   6 -105753  105753
  -3  26   6   45333   92215
  -2  26   6  -39079   90754
  -1  26   6  -90803   91035
   0  26   6  -41742   95446
   1  26   6  731121  104600
   2  26   6  245404  103667
   3  26   6  620285  103741
   4  26   6  149986  145275
   5  26   6  266184  118426
   6  26   6   58274  205416
  -5  27   6  262456  192804
  -4  27   6    -802  122161
  -3  27   6  302676  189482
  -2  27   6   23091  120657
  -1  27   6  413617  136150
   0  27   6 -125800  125800
   1  27   6 -126052  126052
   2  27   6   77287  195620
   3  27   6 -111403  111403
   4  27   6   58851  116214
   5  27   6    7695  143736
  -4  28   6   94195  188376
  -3  28   6   21780  186565
  -2  28   6  -38420  145055
  -1  28   6  253958  138341
   0  28   6  103107  173080
   3  28   6  179643  189582
   4  28   6 -144100  198841
  -4  29   6  -62389  198236
  -3  29   6  275102  223595
  -2  29   6  -74465  209910
  -3  30   6   64546  233256
  -1   0   7 2001383   33063
   1   0   7 1767359   39564
   3   0   7 1822439   47555
   5   0   7    4348   25094
   7   0   7  925306   81308
   9   0   7  285568   74866
  11   0   7  309331  109081
  -2   1   7  341887   22271
  -1   1   7 1612700   26214
   0   1   7  113186   12244
   1   1   7  176771   16122
   2   1   7  203040   17236
   3   1   7  139168   17280
   4   1   7   17353   16188
   5   1   7  991145   33016
   6   1   7  248114   26522
   7   1   7  415401   34264
   8   1   7   17885   41394
   9   1   7  589716   58986
  10   1   7   27017   58545
  11   1   7  169629   76134
  12   1   7 -102439  102439
  -2   2   7  868823   38036
  -1   2   7 1900134   27679
   0   2   7 2932997   30472
   1   2   7   15138   13932
   2   2   7 2564226   34585
   3   2   7  214254   18613
   4   2   7  107141   17913
   5   2   7  313038   23061
   6   2   7  123391   24325
   7   2   7  343989   41400
   8   2   7  211349   45694
   9   2   7   84168   52132
  10   2   7  416100   64580
  11   2   7   73247   75035
  12   2   7  316105  103545
  -2   3   7 4129578   66615
  -1   3   7 1202073   26079
   0   3   7  496717   24416
   1   3   7   95734   15432
   2   3   7 1122870   28513
   3   3   7  -10287   15183
   4   3   7 2441272   57516
   5   3   7  473749   24455
   6   3   7  577112   29201
   7   3   7  128735   27970
   8   3   7  862964   68907
   9   3   7   66217  102540
  10   3   7  171677   62173
  11   3   7  -36100   72790
  12   3   7  127523   99078
  -2   4   7 2064688   53936
  -1   4   7   61809   15213
   0   4   7 3666189   42576
   1   4   7  917326   28264
   2   4   7 3064598   40435
   3   4   7  532745   25486
   4   4   7  858194   31242
   5   4   7   58597   21186
   6   4   7  158534   29775
   7   4   7  139106   31717
   8   4   7  114070   44307
   9   4   7   12429   92377
  10   4   7  236431   63584
  11   4   7  -73429   73429
  12   4   7  450398  113306
  -3   5   7   24392   24955
  -2   5   7 1789369   56553
  -1   5   7  270395   22255
   0   5   7  463417   25792
   1   5   7  225439   21530
   2   5   7   16305   15886
   3   5   7  421493   23091
   4   5   7  177839   19392
   5   5   7  108957   21939
   6   5   7 1667588   42722
   7   5   7  548874  133432
   8   5   7  694891   55902
   9   5   7  119134   86238
  10   5   7  386475  108075
  11   5   7    8830   77190
  12   5   7    3909   99775
  -2   6   7 5469944   90163
  -1   6   7  377990   29382
   0   6   7 2127451   38932
   1   6   7  642537   30994
   2   6   7 1266753   42039
   3   6   7  930348   30207
   4   6   7  234164   20697
   5   6   7   -3729   20783
   6   6   7  105642   25278
   7   6   7   96274   34432
   8   6   7  -44457   44457
   9   6   7   93321   57459
  10   6   7   45021   63614
  11   6   7  167038  121457
  12   6   7  191178  117935
  -3   7   7  670385   50917
  -2   7   7  112966   21857
  -1   7   7  569369   36242
   0   7   7 1794256   38842
   1   7   7  165878   22111
   2   7   7  143633   21869
   3   7   7  500339   29914
   4   7   7  291391   22617
   5   7   7  857876   37025
   6   7   7   62992   26172
   7   7   7 1198225   77484
   8   7   7   49960   46327
   9   7   7  592034   93986
  10   7   7  -80809  112100
  11   7   7   70023  149331
  12   7   7 -129809  129809
  -3   8   7 1644037   62590
  -2   8   7   80072   22058
  -1   8   7 4558537   63667
   0   8   7  117071   26076
   1   8   7 2509919   44563
   2   8   7  223845   24297
   3   8   7 1507438   42539
   4   8   7   37182   24955
   5   8   7  215058   30919
   6   8   7  362227   30939
   7   8   7  -18257   35502
   8   8   7   57053   40898
   9   8   7  172007   93383
  10   8   7  -48117   67527
  11   8   7  329708   88634
  -4   9   7   -9056   33207
  -3   9   7  231960   38842
  -2   9   7  375298   33277
  -1   9   7  707701   41008
   0   9   7  565942   33497
   1   9   7  233790   31339
   2   9   7  439797   28022
   3   9   7  223854   39548
   4   9   7  691256   37679
   5   9   7 1037637   49945
   6   9   7  544322   55578
   7   9   7  810202   47741
   8   9   7  461394   75471
   9   9   7  421288   66130
  10   9   7  113658   72991
  11   9   7  -92377  133030
  -6  10   7  700867   62590
  -5  10   7   16727   39245
  -4  10   7   96989   41055
  -3  10   7   86642   39647
  -2  10   7  374919   33779
  -1  10   7  569164   37498
   0  10   7 3538189   64886
   1  10   7 3468201   52903
   2  10   7  180935   38007
   3  10   7  389297   31058
   4  10   7  182853   36979
   5  10   7   36233   32855
   6  10   7   15368   35579
   7  10   7   77754   35964
   8  10   7   45462   57634
   9  10   7  172393  104251
  10  10   7  398135  128804
  11  10   7  216729  149131
  -8  11   7  275265   67220
  -7  11   7  620939   70238
  -6  11   7  840120   53736
  -5  11   7   28375   31023
  -4  11   7 1403561   76678
  -3  11   7  775037   70440
  -2  11   7  850878   50514
  -1  11   7  -27450   28679
   0  11   7  349351   33495
   1  11   7   63208   23166
   2  11   7  115606   34836
   3  11   7   15350   26588
   4  11   7  416039   35660
   5  11   7   93823   35208
   6  11   7 1029499   67800
   7  11   7  124983   43398
   8  11   7 1412880  110691
   9  11   7   24777  107470
  10  11   7  435450  127797
  11  11   7  111076  173482
  -8  12   7  820006   86138
  -7  12   7  204346   61785
  -6  12   7   11669   52327
  -5  12   7   76754   33792
  -4  12   7  345939   48100
  -3  12   7   13988   66113
  -2  12   7  259986   31092
  -1  12   7   30897   41660
   0  12   7 2776921   65519
   1  12   7   54645   30486
   2  12   7 2448465   54995
   3  12   7   75182   30191
   4  12   7  137885   32942
   5  12   7    8356   32589
   6  12   7  124636   36498
   7  12   7   13430   47254
   8  12   7  -27279   67451
   9  12   7 -105056  105056
  10  12   7  394489  144905
  -9  13   7   26283   84528
  -8  13   7   62989   70036
  -7  13   7   30901   43448
  -6  13   7 2687076  120351
  -5  13   7   62623   37279
  -4  13   7  419410   43329
  -3  13   7  360490   42077
  -2  13   7  942242   59503
  -1  13   7  205257   28751
   0  13   7  246359   44980
   1  13   7   33706   34616
   2  13   7  146647   27522
   3  13   7  -27064   27064
   4  13   7  583330   51089
   5  13   7   84317   41105
   6  13   7 2057641   62536
   7  13   7  279637   52829
   8  13   7  566249   78117
   9  13   7  169058  116729
  10  13   7  481187  152955
 -11  14   7  195694  125382
  -9  14   7  829067  107872
  -8  14   7  523913   91370
  -7  14   7  440191   54840
  -6  14   7  192986   48057
  -5  14   7   71594   52728
  -4  14   7   34970   40770
  -3  14   7   23027   31707
  -2  14   7  508299   38073
  -1  14   7  710358   40480
   0  14   7  362448   33725
   1  14   7  982505   51542
   2  14   7  218431   36660
   3  14   7  545947   37552
   4  14   7  445565   66355
   5  14   7  530696   65185
   6  14   7   55984   61873
   7  14   7  -27298   54589
   8  14   7   42192   76416
   9  14   7  164733  122968
  10  14   7 -108477  162816
 -13  15   7  178823  187168
 -12  15   7 -146917  146917
 -11  15   7  210083  134238
 -10  15   7   64574  109081
  -9  15   7  269995  105457
  -8  15   7   -4163   78690
  -7  15   7  296007  101232
  -6  15   7  177684   77684
  -5  15   7  681904   84929
  -4  15   7  357021   49176
  -3  15   7  712366   60558
  -2  15   7  -13357   43814
  -1  15   7  343414   35417
   0  15   7   70894   32351
   1  15   7  -15783   33639
   2  15   7   -2638   31219
   3  15   7  360784   55114
   4  15   7  266471   43185
   5  15   7 1099490   61814
   6  15   7  134506   44098
   7  15   7  546193   60805
   8  15   7  -43791   90364
   9  15   7  438426  148930
 -13  16   7  454953  204678
 -12  16   7 -164426  164426
 -11  16   7  483601  142691
 -10  16   7  -73659  127394
  -9  16   7  951457   79504
  -8  16   7   76963  103243
  -7  16   7  664421  117231
  -6  16   7  -60075   60075
  -5  16   7   85276   61785
  -4  16   7    5749   48016
  -3  16   7   28628   32579
  -2  16   7   33717   32810
  -1  16   7 1007596   51921
   0  16   7   17979   34091
   1  16   7 1163619   83119
   2  16   7   55225   34188
   3  16   7 1440696   68127
   4  16   7   -5490   45269
   5  16   7  224514   52578
   6  16   7   14819   47979
   7  16   7   -9083   85955
   8  16   7    8962   89817
   9  16   7  303597  149935
 -13  17   7  178054  227016
 -12  17   7   47187  187369
 -11  17   7   91205  150942
 -10  17   7   59097  133834
  -9  17   7   91892   73065
  -8  17   7  100096   67310
  -7  17   7  464878   68851
  -6  17   7   26639  114515
  -5  17   7  284250   58753
  -4  17   7  348967   84226
  -3  17   7 1319758   66771
  -2  17   7  586700   90690
  -1  17   7  122542   44607
   0  17   7   94791   63211
   1  17   7   26900   42627
   2  17   7  -15374   36445
   3  17   7   18064   45692
   4  17   7   60719   49482
   5  17   7  512683   57509
   6  17   7  183278   52539
   7  17   7  425039   66823
   8  17   7  126006  101808
 -12  18   7  148709  201859
 -11  18   7  341850  170464
 -10  18   7  377849  148326
  -9  18   7  415874   85813
  -8  18   7  218696   73216
  -7  18   7  276078   70261
  -6  18   7   69116   59826
  -5  18   7  125651   92879
  -4  18   7  133533   53276
  -3  18   7  306092   44354
  -2  18   7  580222   75873
  -1  18   7  611562   57722
   0  18   7  411437   57058
   1  18   7  734282  101433
   2  18   7 1646483  161407
   3  18   7  209007   72426
   4  18   7 1028517   74988
   5  18   7  137221   52165
   6  18   7    -269   59027
   7  18   7   58431   62064
   8  18   7 -104595  104595
 -12  19   7  277356  219368
 -11  19   7   63288  181935
 -10  19   7  -64201  166238
  -9  19   7   48501  129206
  -8  19   7  252355   78513
  -7  19   7   45950   71266
  -6  19   7  336849   72653
  -5  19   7  101240   67215
  -4  19   7 1504629  134741
  -3  19   7   65167   44538
  -2  19   7  722595  148326
  -1  19   7  144752   56359
   0  19   7   82471   77785
   1  19   7   57865   90565
   2  19   7   39908   60630
   3  19   7  305115   54913
   4  19   7  343504   63773
   5  19   7   58458   62244
   6  19   7  671061   77980
   7  19   7  -82059   82059
   8  19   7  407120  171068
 -11  20   7   28980  202866
 -10  20   7  434594  187771
  -9  20   7   63046   96179
  -8  20   7  329514   86645
  -7  20   7   94379  100023
  -6  20   7   88790   75075
  -5  20   7  109071   72565
  -4  20   7   69493   60759
  -3  20   7    8597   87942
  -2  20   7  797056  137256
  -1  20   7   45595   82917
   0  20   7  589479  101433
   1  20   7   -9476   73403
   2  20   7  719697   55052
   3  20   7   36696   55678
   4  20   7  518538   58708
   5  20   7   -5452   62953
   6  20   7   36034   82236
   7  20   7  -96867   96867
   8  20   7  253216  179318
 -10  21   7 -200854  200854
  -9  21   7  125538  172678
  -8  21   7  295583  119344
  -7  21   7  107506  132125
  -6  21   7  254012   84905
  -5  21   7  -76353   76353
  -4  21   7  817637   86790
  -3  21   7  546277   60535
  -2  21   7  326959   82011
  -1  21   7  199768   99017
   0  21   7  170704   75402
   1  21   7  -54140   57994
   2  21   7   38420   52055
   3  21   7  -37395   56116
   4  21   7  629510   64771
   5  21   7  142454   67386
   6  21   7  389332   73770
   7  21   7  129258  108206
   8  21   7  354859  190992
  -9  22   7  377108  196426
  -8  22   7  120470  108443
  -7  22   7  103368  131319
  -6  22   7   98645   88796
  -5  22   7  106621  108175
  -4  22   7  138832   81215
  -3  22   7   47910   60538
  -2  22   7  229109   81672
  -1  22   7  530655   85344
   0  22   7  255858   65927
   1  22   7  341429   69315
   2  22   7  627864   62115
   3  22   7  419977   65245
   4  22   7  394458   68586
   5  22   7   -4479   73345
   6  22   7   45192   94479
   7  22   7  -13730  115215
   8  22   7  219532  219972
  -8  23   7  -55414  232148
  -7  23   7  269766  106879
  -6  23   7   54485  113005
  -5  23   7  510620  101254
  -4  23   7   18761   89310
  -3  23   7  690292  114285
  -2  23   7  -59084  103646
  -1  23   7  353361   71192
   0  23   7   69610   72405
   1  23   7   81564   74288
   2  23   7   51692   63985
   3  23   7   66354   67778
   4  23   7   22909   73211
   5  23   7  465173  109546
   6  23   7   15621   98970
   7  23   7  406643  127321
   8  23   7  252094  238287
  -7  24   7 -141482  141482
  -6  24   7   33724  112693
  -5  24   7  -77560  102513
  -4  24   7   37667   75366
  -3  24   7  -96050   96050
  -2  24   7   71213   75579
  -1  24   7  246535   78302
   0  24   7  -61584   76607
   1  24   7  467711  137710
   2  24   7   19066  127881
   3  24   7  412817   76934
   4  24   7   73311   92796
   5  24   7 -100409  100409
   6  24   7   24509  110486
   7  24   7  125712  140992
  -7  25   7 -157985  165030
  -6  25   7  263798  159193
  -5  25   7  142421  175796
  -4  25   7   93917  141885
  -3  25   7  231505   85775
  -2  25   7   47805  115577
  -1  25   7  113799   84792
   0  25   7  155323   89672
   1  25   7  -91686   91686
   2  25   7   45708   79532
   3  25   7   42345   96109
   4  25   7   76418  100896
   5  25   7  247282  112575
   6  25   7  203074  137225
  -6  26   7 -176904  176904
  -5  26   7  164345  172073
  -4  26   7  -86101  107911
  -3  26   7   42061  107328
  -2  26   7  197229   92892
  -1  26   7   88409   96335
   0  26   7  247144  150414
   1  26   7  108580  103293
   2  26   7  342563  101396
   3  26   7  193975  114266
   4  26   7  222482  112520
   5  26   7   97493  182869
   6  26   7  186614  154807
  -5  27   7   56439  191595
  -4  27   7  406245  128340
  -3  27   7   23227  126506
  -2  27   7  363239  126229
  -1  27   7   23782  190489
   0  27   7  -56515  127195
   1  27   7 -180728  180728
   2  27   7   35857  138766
   3  27   7   90063  135392
   4  27   7   50368  188778
   5  27   7  -79094  204678
  -4  28   7  132108  189784
  -3  28   7 -121960  191595
  -2  28   7   81721  203268
  -1  28   7 -198439  198439
   2  28   7  167848  224602
  -3  29   7  147563  227217
  -2  29   7  307823  217156
  -2   0   8 4153125   70036
   0   0   8 3952160   53554
   2   0   8 2044758   48305
   4   0   8  501814   56352
   6   0   8   92692   53030
   8   0   8  471316   73659
  10   0   8  920345  111294
  12   0   8  455839  146313
  -2   1   8 5847746   69433
  -1   1   8   33702   15283
   0   1   8  457593   22999
   1   1   8 1262008   28442
   2   1   8 2701001   37257
   3   1   8  616664   27876
   4   1   8 2492509   38497
   5   1   8  177437   23964
   6   1   8  559800   30210
   7   1   8   69053   33364
   8   1   8  447808   80402
   9   1   8   37019   90866
  10   1   8  -64954   64954
  11   1   8   67332   81952
  12   1   8 -163018  163018
  -2   2   8 1094109   33583
  -1   2   8 1199498   28648
   0   2   8 1986446   29772
   1   2   8 2465017   34386
   2   2   8   11565   15705
   3   2   8  303834   20513
   4   2   8  501347   25563
   5   2   8  230353   23867
   6   2   8  136102   26144
   7   2   8  212436   30826
   8   2   8  421652   53284
   9   2   8  306302   57547
  10   2   8  266644   69678
  11   2   8  614510   90148
  12   2   8  146717  103603
  -3   3   8 2347714   55546
  -2   3   8  845965   34510
  -1   3   8  499041   26567
   0   3   8   71239   18088
   1   3   8 1841998   31851
   2   3   8  389993   21850
   3   3   8 2412575   37861
   4   3   8   -3734   30676
   5   3   8 1322037   38347
   6   3   8   54692   25447
   7   3   8  966175   46333
   8   3   8   66139   65910
   9   3   8  129701   87144
  10   3   8  -41142   65815
  11   3   8   39271   83364
  12   3   8   98586  167444
  -2   4   8  365665   36226
  -1   4   8 3034271   39964
   0   4   8  416783   24900
   1   4   8 2449432   34382
   2   4   8   10783   16188
   3   4   8  620447   28529
   4   4   8  153769   20035
   5   4   8   35932   22649
   6   4   8   82955   26098
   7   4   8   26303   34460
   8   4   8   40719   47338
   9   4   8  499699   63540
  10   4   8  -51095   66930
  11   4   8  433309   89078
  -3   5   8 2998115   66213
  -2   5   8  -27572   28376
  -1   5   8  479117   46548
   0   5   8   38842   19130
   1   5   8 2556505   43160
   2   5   8  208364   19288
   3   5   8 1702675   35244
   4   5   8  964104   40929
   5   5   8 1976976   43435
   6   5   8  127197   27252
   7   5   8 1680875   51747
   8   5   8  216804   53467
   9   5   8   73440   59195
  10   5   8  -83211   89759
  11   5   8  -84788   84788
  -3   6   8 1558930   57961
  -2   6   8  841115   34233
  -1   6   8 2165515   68327
   0   6   8 3444158   46525
   1   6   8 1822215   39795
   2   6   8 3212335   57278
   3   6   8  843500   31092
   4   6   8  436929   25973
   5   6   8   47094   23671
   6   6   8  161753   28075
   7   6   8  293951   32911
   8   6   8  131270   52915
   9   6   8  437085   72251
  10   6   8  325315   73927
  11   6   8  273143   95696
  -3   7   8  -10666   30792
  -2   7   8   74289   22050
  -1   7   8  746522   47597
   0   7   8   10119   19450
   1   7   8  112753   21108
   2   7   8 1886397   43204
   3   7   8  248731   27992
   4   7   8 1132637   36650
   5   7   8    4398   24438
   6   7   8 3051682   73086
   7   7   8   -8612   31957
   8   7   8  280660   53065
   9   7   8   66317   60975
  10   7   8   62570   71771
  11   7   8   -8775   89659
  -4   8   8  479238   43873
  -3   8   8  392450   43873
  -2   8   8 4456635   62601
  -1   8   8   14515   23725
   0   8   8 2970078   47294
   1   8   8  312695   25663
   2   8   8 3400760   53734
   3   8   8  172232   31855
   4   8   8   64284   27085
   5   8   8   90004   32445
   6   8   8   50135   30454
   7   8   8   50122   48167
   8   8   8  108159   58629
   9   8   8  -62204   62204
  10   8   8  609192  156779
  11   8   8   64176  107168
  -4   9   8  669936   61785
  -3   9   8   26082   37635
  -2   9   8  228993   29886
  -1   9   8   13535   24385
   0   9   8  276933   27877
   1   9   8   57581   21991
   2   9   8  198623   25854
   3   9   8   76618   25886
   4   9   8 1526420   51038
   5   9   8  899692   52107
   6   9   8  304759   40279
   7   9   8  707960   49045
   8   9   8  577131  102238
   9   9   8   41150   65800
  10   9   8  -99421  119746
  11   9   8  -67822  158992
  -7  10   8  -10263   53534
  -5  10   8  222018   47094
  -4  10   8  639995   66213
  -3  10   8 1230279   72452
  -2  10   8  525498   35279
  -1  10   8 1478008   48648
   0  10   8 1226440   49714
   1  10   8 2988741   52765
   2  10   8  698954   38651
   3  10   8  143101   30035
   4  10   8   76724   32150
   5  10   8  167595   36626
   6  10   8   86763   51842
   7  10   8  183126   60778
   8  10   8   63007   65317
   9  10   8  168381  111696
  10  10   8  308164  139671
  -8  11   8  -58766   58766
  -6  11   8  193709   56753
  -5  11   8 1072695   77885
  -4  11   8  351392   51521
  -3  11   8  709629   69835
  -2  11   8   59003   26001
  -1  11   8   59588   29886
   0  11   8  -26964   26964
   1  11   8  159268   25664
   2  11   8  599475   34623
   3  11   8  652356   41432
   4  11   8  374488   38032
   5  11   8  897153   65005
   6  11   8  144446   42417
   7  11   8  553520   46117
   8  11   8   -4427   91772
   9  11   8  137539  116729
  10  11   8   64313  139470
  -8  12   8  303062   72854
  -7  12   8   12601   64201
  -6  12   8  -38527   41660
  -5  12   8  153551   38889
  -4  12   8   57311   47898
  -3  12   8  738408   75471
  -2  12   8  452172   34863
  -1  12   8 1293138   52879
   0  12   8   64908   29095
   1  12   8 1726940   50630
   2  12   8   15738   28416
   3  12   8  669430   43904
   4  12   8  -34976   34976
   5  12   8  161456  117409
   6  12   8   46888   39138
   7  12   8  217562   89254
   8  12   8   44015   71690
   9  12   8  677227  136653
  10  12   8   40251  143897
 -10  13   8  149097   98213
  -9  13   8  428602   96201
  -8  13   8  357946   79696
  -7  13   8 1628192  120351
  -6  13   8  278409   44120
  -5  13   8 1520754   68746
  -4  13   8   11484   37839
  -3  13   8  279664   56151
  -2  13   8  465521   78590
  -1  13   8   82591   33558
   0  13   8   75128   49207
   1  13   8  137281   29986
   2  13   8  388204   36638
   3  13   8  948095   55200
   4  13   8  114166   65509
   5  13   8 1536809  102884
   6  13   8   42926   39832
   7  13   8  323031   48288
   8  13   8  211234   77404
   9  13   8  198786  131621
 -10  14   8  316755  110892
  -9  14   8  154768   94992
  -8  14   8   27847   81910
  -7  14   8   -6038   75471
  -6  14   8  260772   53835
  -5  14   8  -41930   42492
  -4  14   8   12337   45483
  -3  14   8   55365   42194
  -2  14   8  701162   41817
  -1  14   8 1653743   72452
   0  14   8  727781   49942
   1  14   8  249326   35457
   2  14   8  433358   42410
   3  14   8  544627   41320
   4  14   8  388294   47879
   5  14   8   12660   46602
   6  14   8   11472   43327
   7  14   8   -2959   49279
   8  14   8  104455   81944
   9  14   8   53919  138464
 -12  15   8  171096  155771
 -10  15   8  166084  117331
  -9  15   8   71177  106666
  -8  15   8 1053174  110086
  -7  15   8   92720   54977
  -6  15   8 1281103   79421
  -5  15   8  659595   60389
  -4  15   8 2420305   84329
  -3  15   8   11399   31204
  -2  15   8  295302   34355
  -1  15   8  -17555   34829
   0  15   8   11388   33682
   1  15   8    5474   36611
   2  15   8  618572   40383
   3  15   8   29175   42898
   4  15   8 1554708   73822
   5  15   8  246839   51129
   6  15   8  587929   52339
   7  15   8   47166   52847
   8  15   8  447202  103847
   9  15   8  -79295  137457
 -13  16   8   56946  204678
 -11  16   8   22730  140879
 -10  16   8  370325  130213
  -9  16   8    2968   69004
  -8  16   8  141507   64201
  -7  16   8    4370   57596
  -6  16   8  223925   65207
  -5  16   8  -50092   50092
  -4  16   8  470149   57136
  -3  16   8  263376   41279
  -2  16   8 1009179   52461
  -1  16   8  -34700   34700
   0  16   8  838869   49691
   1  16   8   34045   40785
   2  16   8  315559   38695
   3  16   8  137385   46892
   4  16   8  872998   67509
   5  16   8   26876   62282
   6  16   8   20589   56005
   7  16   8   63232   57526
   8  16   8  127147  101295
 -13  17   8   15152  231846
 -12  17   8 -148125  179520
 -11  17   8  190339  160603
 -10  17   8  355061  145809
  -9  17   8  237978  119445
  -8  17   8  355521   84929
  -7  17   8   -5790   75270
  -6  17   8  442855   66278
  -5  17   8  710352   89257
  -4  17   8 1086927   78590
  -3  17   8    9552   37501
  -2  17   8  311542   76285
  -1  17   8   45583   54339
   0  17   8  234683   83822
   1  17   8   58259   60271
   2  17   8  212954   76253
   3  17   8  -14067   50429
   4  17   8  677711   70805
   5  17   8  234323   58309
   6  17   8  733299   68500
   7  17   8  116345   69640
   8  17   8  153815  106811
 -12  18   8   92131  197431
 -11  18   8  199895  175293
 -10  18   8  377419   96402
  -9  18   8   88372   78520
  -8  18   8   91059   72145
  -7  18   8  -14086  113106
  -6  18   8   -8455   62378
  -5  18   8   58930   61576
  -4  18   8   49995   98011
  -3  18   8  127606   43629
  -2  18   8  811739   95797
  -1  18   8  247079   54271
   0  18   8  234326   69132
   1  18   8  193507  149935
   2  18   8  340108   65677
   3  18   8  623622   57825
   4  18   8   15477   65326
   5  18   8   17158   61736
   6  18   8   -4495   67564
   7  18   8  128695   89771
   8  18   8 -101232  163620
 -12  19   8 -126791  223192
 -11  19   8  166253  186766
 -10  19   8  -48301  163218
  -9  19   8  704490   95014
  -8  19   8   78641  122163
  -7  19   8  353922  101130
  -6  19   8  137437   70426
  -5  19   8  953541   80530
  -4  19   8   35479   64404
  -3  19   8  362082   48832
  -2  19   8   17919  110792
  -1  19   8   54583   57278
   0  19   8  -54614   54753
   1  19   8  126026   89759
   2  19   8  -43785   51185
   3  19   8 1066766   60164
   4  19   8  -13944   53803
   5  19   8  540770   62695
   6  19   8  -28670   66408
   7  19   8  285905   74850
   8  19   8   92528  178716
 -11  20   8  594528  205080
 -10  20   8  144393  186766
  -9  20   8  149718   99808
  -8  20   8   26311   87765
  -7  20   8   22757   79285
  -6  20   8   39634   77536
  -5  20   8  299448   80402
  -4  20   8   64887   69222
  -3  20   8  893558   81073
  -2  20   8   50484  213835
   0  20   8  111771   72050
   1  20   8  662760   68789
   2  20   8   -6111   51004
   3  20   8  218094   56622
   4  20   8  -21333   58451
   5  20   8   71953   96528
   6  20   8   20265   84765
   7  20   8   25458  121117
   8  20   8 -186565  186565
 -10  21   8 -107269  198236
  -9  21   8  308643  109893
  -8  21   8  217389   96178
  -7  21   8  340058   94040
  -6  21   8  582310   93159
  -5  21   8  553731   89988
  -4  21   8   70836   57554
  -3  21   8  473177   99741
  -2  21   8   69884   63698
  -1  21   8  173932  102238
   0  21   8   -6790   64715
   1  21   8  253491   66204
   2  21   8   16707   74959
   3  21   8  567775   65219
   4  21   8   55697   65034
   5  21   8  277662   72159
   6  21   8  214572   91669
   7  21   8  311474  101855
   8  21   8 -210513  210513
  -9  22   8  241337  246237
  -8  22   8   64873  109281
  -7  22   8  106001  109081
  -6  22   8  -13292  121056
  -5  22   8 -112804  112804
  -4  22   8  344947   92438
  -3  22   8   57780   62884
  -2  22   8  166457   81629
  -1  22   8  113009   67890
   0  22   8  266121   72403
   1  22   8  444397   74776
   2  22   8  314775   68701
   3  22   8  -32314   64104
   4  22   8  -34404   71210
   5  22   8   60413   91940
   6  22   8  -97584   97584
   7  22   8 -106236  106236
   8  22   8 -166035  217961
  -8  23   8  440498  124276
  -7  23   8   54585  137558
  -6  23   8  620849  110248
  -5  23   8   30240  172275
  -4  23   8  667443  103382
  -3  23   8   64449   93592
  -2  23   8  311283   87298
  -1  23   8   15922   84721
   0  23   8   63197  108869
   1  23   8  -76796   76796
   2  23   8  141416   68653
   3  23   8   35667   71347
   4  23   8  543662   82428
   5  23   8   45252   98533
   6  23   8  248776  110072
   7  23   8  109030  176431
  -8  24   8  133359  162816
  -7  24   8  -19722  151746
  -6  24   8   91028  113406
  -5  24   8  134171  111276
  -4  24   8  160391   78711
  -3  24   8   25087  101232
  -2  24   8  333652   87417
  -1  24   8  -80296   80296
   0  24   8  191669  150317
   1  24   8   39673  100230
   2  24   8  435783   78290
   3  24   8    9093  112680
   4  24   8   82201   98780
   5  24   8   62736  110814
   6  24   8   12406  117672
   7  24   8 -120843  148351
  -8  25   8  320723  194010
  -7  25   8  251499  175093
  -6  25   8  415400  169055
  -5  25   8  -37433  155570
  -4  25   8  436338  159193
  -3  25   8  -92367   92367
  -2  25   8  103641   88947
  -1  25   8   55624  137117
   0  25   8  -88791   88791
   1  25   8   60927   99233
   2  25   8  188115   85270
   3  25   8  -98215   98215
   4  25   8  190563  188806
   5  25   8  268039  121781
   6  25   8  353918  130897
  -7  26   8    8183  197633
  -6  26   8   77789  185960
  -5  26   8   87232  170061
  -4  26   8  -24261  110005
  -3  26   8  122467  280451
  -2  26   8   99339  114738
  -1  26   8  122861  118108
   0  26   8  167758  236677
   1  26   8  386836  132346
   2  26   8  139482  199243
   3  26   8  240280  144603
   4  26   8 -194377  197030
   5  26   8  -70238  194816
  -5  27   8  185313  206287
  -4  27   8   75984  121266
  -3  27   8  -48301  123557
  -2  27   8   88383  183746
  -1  27   8  -28176  170766
   0  27   8   83964  133268
   1  27   8   65154  179118
   2  27   8   38532  177106
   3  27   8  152647  177708
   4  27   8   31882  192804
  -4  28   8   65627  188778
  -3  28   8   89559  193206
  -2  28   8  -57961  216753
  -1  28   8  313068  200250
  -3  29   8 -138263  220778
  -1   0   9 2336543   43776
   1   0   9 1497440   44276
   3   0   9  309997   29017
   5   0   9  126144   34858
   7   0   9  959367   69771
   9   0   9 1029556  108678
  11   0   9  719253  135444
  -3   1   9  909275   46489
  -2   1   9   55128   21767
  -1   1   9   14377   17021
   0   1   9  349884   19207
   1   1   9 1621266   31608
   2   1   9  262944   19944
   3   1   9 1443553   34182
   4   1   9  184951   22738
   5   1   9 1502094   41616
   6   1   9  375797   31364
   7   1   9  687518   38754
   8   1   9   44120   42642
   9   1   9  114337   61189
  10   1   9  -65471   73010
  11   1   9  -54136   90215
  -3   2   9  118725   29182
  -2   2   9 1609701   30122
  -1   2   9 1600716   33341
   0   2   9 1649660   42276
   1   2   9  841063   27836
   2   2   9  762662   28252
   3   2   9   75125   18314
   4   2   9   23798   20411
   5   2   9   39804   23669
   6   2   9  251289   30185
   7   2   9 1071994   49510
   8   2   9  817241   62815
   9   2   9  265762   65176
  10   2   9  335286   77170
  11   2   9  -23686   89675
  -3   3   9  211965   33207
  -2   3   9  687574   61383
  -1   3   9  330158   21233
   0   3   9 1511598   36073
   1   3   9  590478   26976
   2   3   9 2136894   36145
   3   3   9  366266   22213
   4   3   9 1615015   39210
   5   3   9  198888   29410
   6   3   9 1479525   47189
   7   3   9  179401   33817
   8   3   9  423854   58200
   9   3   9   25053   59513
  10   3   9   42970  116125
  11   3   9   31503  120754
  -3   4   9   27017   29785
  -2   4   9 3343725   50936
  -1   4   9 1002608   36657
   0   4   9 3486260   46814
   1   4   9 1020151   28567
   2   4   9   62061   17558
   3   4   9   14263   17675
   4   4   9   27530   21483
   5   4   9   13627   24864
   6   4   9  874662   42885
   7   4   9  -24696   31964
   8   4   9 1328238   83961
   9   4   9   20363   68829
  10   4   9  384532  137056
  11   4   9   65510   94365
  -3   5   9   61430   30992
  -2   5   9  166841   21894
  -1   5   9   10916   17986
   0   5   9   83687   20977
   1   5   9   22276   19175
   2   5   9 2607901   45832
   3   5   9  722827   31542
   4   5   9 1826503   41642
   5   5   9  553858   31214
   6   5   9 2285161   53544
   7   5   9  -32736   32736
   8   5   9  199261   86036
   9   5   9   36019   63221
  10   5   9  -17853   77569
  11   5   9  -91921   91921
  -3   6   9 1523912   60778
  -2   6   9 2399778   69835
  -1   6   9 3440855   46592
   0   6   9  897816   34305
   1   6   9  926261   35407
   2   6   9  787000   37410
   3   6   9   13119   19597
   4   6   9     736   22330
   5   6   9   96772   27039
   6   6   9  269001   40502
   7   6   9  154868   52453
   8   6   9  361261   70540
   9   6   9  569104  103948
  10   6   9  321243  108075
  11   6   9  209220  123671
  -4   7   9   90350   33610
  -3   7   9  -20930   32604
  -2   7   9   39189   36426
  -1   7   9  177109   22432
   0   7   9 1625237   57614
   1   7   9   22041   27097
   2   7   9  875684   38498
   3   7   9 1244929   45245
   4   7   9  172871   35642
   5   7   9 2500400   55921
   6   7   9  116152   31960
   7   7   9  461918   40241
   8   7   9   82342   53784
   9   7   9   14430   69028
  10   7   9  -79471   79471
  11   7   9 -150338  150338
  -4   8   9   58965   35622
  -3   8   9 3681782   88352
  -2   8   9 1233665   42166
  -1   8   9 3957867   63470
   0   8   9   21901   20630
   1   8   9 2303066   76346
   2   8   9  116526   25607
   3   8   9  223870   55517
   4   8   9   30671   29542
   5   8   9  547464   61086
   6   8   9  -31467   31467
   7   8   9  837584   45425
   8   8   9   23617   48142
   9   8   9  537268   78178
  10   8   9  -63409   86421
  -5   9   9 1168835   71245
  -4   9   9  132714   40251
  -3   9   9   62853   40452
  -2   9   9  113582   25130
  -1   9   9  461570   33160
   0   9   9   28222   22133
   1   9   9  297764   28252
   2   9   9   13335   27195
   3   9   9 1081887   47391
   4   9   9   21801   30827
   5   9   9 1039522   96200
   6   9   9  374195   44698
   7   9   9  666119   52710
   8   9   9  -54219   67609
   9   9   9  -58163  112301
  10   9   9 -121960  136048
  -4  10   9  658162   70640
  -3  10   9 1649294   77885
  -2  10   9 1670710   48933
  -1  10   9  463918   87546
   0  10   9 1636117   56242
   1  10   9  805538   59538
   2  10   9  161273   28982
   3  10   9   54497   35620
   4  10   9  -27360   31757
   5  10   9  105538   51201
   6  10   9  448054   48023
   7  10   9   81227   48904
   8  10   9  504772  140779
   9  10   9  567910  128603
  10  10   9  159605  141683
  -5  11   9  590020   61785
  -4  11   9   36062   43270
  -3  11   9   79413   45685
  -2  11   9   55492   45585
  -1  11   9   43186   37735
   0  11   9  537947   34860
   1  11   9  282707   31261
   2  11   9  636275   37879
   3  11   9  622775   40651
   4  11   9 1673801   76384
   5  11   9   45998   50414
   6  11   9   77997   45130
   7  11   9   30595   44979
   8  11   9   40041  135646
   9  11   9   68710  125985
  -8  12   9  -29785   74866
  -7  12   9   93567   65005
  -6  12   9  827395   95797
  -5  12   9  -45885   46489
  -4  12   9 1661773   88553
  -3  12   9  188863   53132
  -2  12   9 2432458   60534
  -1  12   9   34014   30679
   0  12   9 1735746   61690
   1  12   9   19447   28795
   2  12   9  549756   38223
   3  12   9   38054   34626
   4  12   9   26942   48752
   5  12   9    6179   53504
   6  12   9  224068   49957
   7  12   9    8205   48755
   8  12   9  351833   83459
   9  12   9  102751  132829
  -9  13   9  272702   94992
  -8  13   9 1133354  105256
  -7  13   9  568750   81509
  -6  13   9 1925764  119143
  -5  13   9  151712   98011
  -4  13   9  858558   72653
  -3  13   9   35974   48804
  -2  13   9   19752   30836
  -1  13   9  -15224   33382
   0  13   9   90780   49810
   1  13   9   43495   32120
   2  13   9  778118   43945
   3  13   9  195419   39969
   4  13   9  808866   85935
   5  13   9  -24858   57258
   6  13   9  460637   56425
   7  13   9   31869   51192
   8  13   9  -56002   83816
   9  13   9  162957  146313
 -10  14   9   77707  110490
  -9  14   9  -18313   95395
  -8  14   9   -2213   86339
  -7  14   9  157084   80703
  -6  14   9   25498   93684
  -5  14   9 1006757   64792
  -4  14   9 1174855   81308
  -3  14   9 1150766   62791
  -2  14   9  579150   44051
  -1  14   9  922182   61283
   0  14   9  377109   43813
   1  14   9  289604   37882
   2  14   9  412547   55127
   3  14   9  485077   61785
   4  14   9   63563   47586
   5  14   9   36441   62963
   6  14   9  633989   59359
   7  14   9  250804   90051
   8  14   9  171737  136653
 -10  15   9   77988  121156
  -9  15   9  511154  117331
  -8  15   9  117365   99219
  -7  15   9 1036929   71348
  -6  15   9  110248   51778
  -5  15   9 1058857   70303
  -4  15   9  605279   90465
  -3  15   9  438689   39817
  -2  15   9   12039   48960
  -1  15   9  187566   58061
   0  15   9  132557   52226
   1  15   9  959581   55652
   2  15   9  162496   37933
   3  15   9 1025912  124173
   4  15   9  619227   67609
   5  15   9  527511   97977
   6  15   9   55796   51750
   7  15   9  464622   60734
   8  15   9 -200552  200552
 -13  16   9  317985  205684
 -12  16   9   24989  172275
 -11  16   9  438528  156779
 -10  16   9 -121960  121960
  -9  16   9   57961  119545
  -8  16   9   20290  120251
  -7  16   9  -42482   59605
  -6  16   9   34826   56580
  -5  16   9  557749  105860
  -4  16   9  -10450   48726
  -3  16   9 2944628   70715
  -2  16   9  221069   40938
  -1  16   9 1371348   74428
   0  16   9  -13569   50414
   1  16   9  708697   75148
   2  16   9  -11930   37502
   3  16   9  276306   63197
   4  16   9   21749   62007
   5  16   9  279337   58634
   6  16   9   26232   60592
   7  16   9  286408   71496
   8  16   9   44417  111193
 -13  17   9 -115923  229030
 -12  17   9   19743  189181
 -11  17   9  354211  158389
 -10  17   9   85295  100628
  -9  17   9  867147   85847
  -8  17   9  205738   74033
  -7  17   9  365648   71419
  -6  17   9   -7830   57684
  -5  17   9  469889   69936
  -4  17   9   69438   55123
  -3  17   9    8294   39185
  -2  17   9   52755   39577
  -1  17   9   25572   49085
   0  17   9  392947   56795
   1  17   9   26560   39860
   2  17   9  363705   66478
   3  17   9  395166   55948
   4  17   9  156995   67132
   5  17   9  413435   63603
   6  17   9   28282   61284
   7  17   9   71388   70421
   8  17   9   57918  167645
 -12  18   9  117790  214538
 -11  18   9  152444  176301
 -10  18   9  -14180  196829
  -9  18   9   56244   82834
  -8  18   9  -52161   75945
  -7  18   9  -50713   68072
  -6  18   9  206363  132225
  -5  18   9  112044   61770
  -4  18   9 1237083  229332
  -3  18   9  425445   58158
  -2  18   9  570018   60433
  -1  18   9  685295   63296
   0  18   9  185885   55291
   1  18   9   88664   60339
   2  18   9   53641   62844
   3  18   9  -45060   48814
   4  18   9   58252   53776
   5  18   9   10027   57686
   6  18   9  131185   65490
   7  18   9  130050   76108
   8  18   9  289164  190388
   9  18   9 -118136  200048
 -12  19   9  -88753  225005
 -11  19   9  106810  192401
 -10  19   9  633670  112460
  -9  19   9   35200  123872
  -8  19   9  465916   87747
  -7  19   9  111290   76280
  -6  19   9  583948   81665
  -5  19   9  141198  132628
  -4  19   9   16033   66701
  -3  19   9    9918   47407
  -2  19   9   93476   92578
  -1  19   9  -36795   56651
   0  19   9  107531   90766
   1  19   9  100865   55678
   2  19   9  673500   56015
   3  19   9  143821   55273
   4  19   9  322168   60738
   5  19   9   31864   64467
   6  19   9  574324   75004
   7  19   9   93215   91815
   8  19   9  120416  196829
   9  19   9  209894  225407
 -11  20   9   77680  209508
 -10  20   9  333601  118131
  -9  20   9   24646   97071
  -8  20   9    3561   91716
  -7  20   9  -46610   82435
  -6  20   9  302698   82639
  -5  20   9   88484   92979
  -4  20   9 1410387  159394
  -3  20   9   71529   54079
  -2  20   9  967213   74127
  -1  20   9  -28154   59427
   0  20   9  630882   81551
   1  20   9   35560   50098
   2  20   9  265887   56409
   3  20   9   33450   59230
   4  20   9  -47892   61142
   5  20   9  -48860  115818
   6  20   9  -42060   90336
   7  20   9  -97620   97620
   8  20   9  -42867  210916
 -10  21   9  213386  123226
  -9  21   9  304752  300476
  -8  21   9  186548  120452
  -7  21   9  122286   93004
  -6  21   9  364283   93290
  -5  21   9  -59902  146213
  -4  21   9  340838  153558
  -3  21   9   28970   59697
  -2  21   9   32454  108686
  -1  21   9  -59121   80319
   0  21   9  166361  111356
   1  21   9  172560   57165
   2  21   9  480643   95192
   3  21   9  -58528   63269
   4  21   9  713381   74409
   5  21   9  129194   74896
   6  21   9  405687  100886
   7  21   9   70729  108402
   8  21   9  374528  239091
  -9  22   9  114310  119319
  -8  22   9   74228  109003
  -7  22   9  -62291   99533
  -6  22   9    -646   95678
  -5  22   9  -49891  123470
  -4  22   9  612520  148829
  -3  22   9  671491  170161
  -2  22   9  146028   86691
  -1  22   9  360731   93469
   0  22   9  237993  101065
   1  22   9  356140   64429
   2  22   9   -4952   64842
   3  22   9  -67804   67804
   4  22   9  -44782   74103
   5  22   9   41086  111153
   6  22   9   19684  107615
   7  22   9 -118291  118291
  -9  23   9  486033  168854
  -8  23   9 -111696  143495
  -7  23   9  703699  120331
  -6  23   9   81238  106293
  -5  23   9  130803  101975
  -4  23   9  149920  101009
  -3  23   9  123104   96396
  -2  23   9    2873   81900
  -1  23   9  -15189   73370
   0  23   9   -7141  100779
   1  23   9  299152   68165
   2  23   9   19599   72317
   3  23   9  181426   78204
   4  23   9 -144509  156494
   5  23   9  289136  109692
   6  23   9   15861  119258
   7  23   9 -174969  174969
  -9  24   9  175485  183343
  -8  24   9  -61182  158992
  -7  24   9   26967  157181
  -6  24   9   35986  118615
  -5  24   9  226312  113555
  -4  24   9  -27882  116289
  -3  24   9  422581   92828
  -2  24   9   97178   99040
  -1  24   9  713316   92209
   0  24   9   76418   87515
   1  24   9  244678   77321
   2  24   9   33633   79917
   3  24   9   58308   98928
   4  24   9   11228  106985
   5  24   9  134001  169778
   6  24   9  -41726  126977
  -8  25   9   28533  190992
  -7  25   9  319618  180929
  -6  25   9 -149532  160401
  -5  25   9  198163  158590
  -4  25   9   59392  148125
  -3  25   9  105176  104556
  -2  25   9  -83607   96417
  -1  25   9  -75503   91045
   0  25   9   95157   97553
   1  25   9   -3256   83570
   2  25   9   70888   89632
   3  25   9  187431  111920
   4  25   9  135347  136682
   5  25   9  108364  196426
  -7  26   9 -193809  193809
  -6  26   9  108965  184351
  -5  26   9  166035  186363
  -4  26   9 -108926  108926
  -3  26   9  129914  119458
  -2  26   9  258316  123451
  -1  26   9  -16638  262136
   0  26   9   97295  326739
   1  26   9  -16830  134216
   2  26   9  -70019  128553
   3  26   9   44772  186967
   4  26   9   86683  197633
   5  26   9   52435  203068
  -4  27   9  104139  137021
  -3  27   9   82135  126131
  -2  27   9   57949  125716
  -1  27   9   83561  141227
   1  27   9   37935  203670
  -3  28   9  -93784  201457
  -2  28   9  225064  214337
  -3  29   9 -229835  229835
  -2   0  10 3156301   73860
   0   0  10 1931490   54239
   2   0  10 1304829   47395
   4   0  10   96919   32311
   6   0  10 1045787   68130
   8   0  10  802610   95797
  10   0  10  398889  119545
  -3   1  10  398672   29351
  -2   1  10    7894   22480
  -1   1  10    -565   17083
   0   1  10  867104   27529
   1   1  10   95919   17255
   2   1  10 2320163   38426
   3   1  10  689347   31426
   4   1  10 1122383   37823
   5   1  10  180411   27782
   6   1  10  431672   34795
   7   1  10  165683   36901
   8   1  10  -28530   45748
   9   1  10   13989  107068
  10   1  10  154298   82620
  -3   2  10  410764   33067
  -2   2  10 1377534   41408
  -1   2  10 1777533   36689
   0   2  10  233665   18558
   1   2  10   15486   16049
   2   2  10  357208   22991
   3   2  10   34839   20253
   4   2  10    7829   21516
   5   2  10  518202   34113
   6   2  10  473581   35694
   7   2  10  742556   44035
   8   2  10  329880   51354
   9   2  10  209011   69390
  10   2  10  298975   83739
  -3   3  10   46686   22397
  -2   3  10   50424   16849
  -1   3  10  658060   30304
   0   3  10  386042   36148
   1   3  10 1342954   31658
   2   3  10  320315   21896
   3   3  10 1542044   38050
   4   3  10  622079   30642
   5   3  10  496345   42541
   6   3  10  -23391   29879
   7   3  10  212216   38414
   8   3  10  -46208   46208
   9   3  10   31151   71640
  10   3  10   60102   85028
  -3   4  10 2190486   65005
  -2   4  10  220168   21439
  -1   4  10  743159   31967
   0   4  10   16702   19307
   1   4  10  338712   20957
   2   4  10   -6095   17282
   3   4  10  172489   22744
   4   4  10    7952   23338
   5   4  10  671763   38455
   6   4  10  156532   39435
   7   4  10 1153353   58316
   8   4  10   -9297   47285
   9   4  10  433314   74296
  10   4  10   36485   86838
  -3   5  10   61002   33408
  -2   5  10   14686   29483
  -1   5  10  220805   22200
   0   5  10  333387   24961
   1   5  10 1002940   36267
   2   5  10  270687   22022
   3   5  10 1322862   37730
   4   5  10  252708   26301
   5   5  10 1282470   45960
   6   5  10   75853   32514
   7   5  10  -18764   35367
   8   5  10  -48651   48651
   9   5  10  -32585  153558
  10   5  10  -56047   87285
  -4   6  10  611342   53333
  -3   6  10 1042508   60578
  -2   6  10 2903282   42870
  -1   6  10  561695   29508
   0   6  10  491802   28630
   1   6  10  261170   25639
   2   6  10  104977   24421
   3   6  10   13704   24052
   4   6  10  316966   28551
   5   6  10  305891   48133
   6   6  10  113589   33754
   7   6  10  557803   42376
   8   6  10  387721   48702
   9   6  10  272222   73615
  10   6  10  209429   91384
  -3   7  10   -7848   34011
  -2   7  10  236156   27317
  -1   7  10   13252   20163
   0   7  10 1753250   42048
   1   7  10 1670058   44108
   2   7  10 1784728   47754
   3   7  10  373900   32810
   4   7  10 1801528   80328
   5   7  10  278304   38213
   6   7  10  966199   45985
   7   7  10   69846   83283
   8   7  10   20338   45983
   9   7  10  -38614   74525
  10   7  10  -45683   90430
  -4   8  10 4142257   92377
  -3   8  10  481883   48301
  -2   8  10 2370897   51348
  -1   8  10  129153   22803
   0   8  10  675033   36776
   1   8  10  392434   30207
   2   8  10   53544   27275
   3   8  10   38681   29585
   4   8  10  441827   65403
   5   8  10   43248   60176
   6   8  10  737439   51063
   7   8  10   61272   40466
   8   8  10  816293   54704
   9   8  10   92005  120754
  10   8  10  532072  111696
  -4   9  10  232093   48100
  -3   9  10  194661   46691
  -2   9  10   11564   24425
  -1   9  10   47243   22552
   0   9  10  805779   39682
   1   9  10  149826   27264
   2   9  10 1318143   48392
   3   9  10    6975   31466
   4   9  10 1278911   71150
   5   9  10  287472   60678
   6   9  10  303938   46845
   7   9  10   39918   72877
   8   9  10  -98515   98515
   9   9  10    -805  120553
  -5  10  10  405531   54741
  -4  10  10  209359   49307
  -3  10  10 1775683   81910
  -2  10  10  179259   53132
  -1  10  10  487229   53132
   0  10  10 1162220   44404
   1  10  10   29227   27070
   2  10  10  229419   33677
   3  10  10  113542   32635
   4  10  10  381426   69433
   5  10  10  218010   52721
   6  10  10   24680   47470
   7  10  10  300523   57727
   8  10  10  424518  145608
   9  10  10  200421  131218
  -8  11  10   50578   68427
  -5  11  10 1248191   84326
  -4  11  10  132438   49911
  -3  11  10   74723   48704
  -2  11  10  248975   31620
  -1  11  10  468672   38454
   0  11  10   19678   53330
   1  11  10 1577072   51265
   2  11  10 1117346   52647
   3  11  10  857762   49251
   4  11  10  183149   51980
   5  11  10  683347   64278
   6  11  10   72522   66120
   7  11  10   52884   57759
   8  11  10    3872   83453
   9  11  10  -80904  139068
  -7  12  10  395847   73257
  -6  12  10  192929   60980
  -5  12  10 1337146   90565
  -4  12  10   79099   53333
  -3  12  10  227918   55144
  -2  12  10   56442   31995
  -1  12  10 3023834   70917
   0  12  10   60969   30804
   1  12  10  160363   31694
   2  12  10  131201   34773
   3  12  10  222237   39960
   4  12  10   25025   83017
   5  12  10  187007   58915
   6  12  10  -12165   52085
   7  12  10  360068   63169
   8  12  10    2985   92477
   9  12  10  519087  139068
  -8  13  10  404872   94389
  -7  13  10 1011371  118136
  -6  13  10  194671   64804
  -5  13  10  535754   72653
  -4  13  10   36056   57760
  -3  13  10  271136   36855
  -2  13  10  100568   34161
  -1  13  10  311911   39454
   0  13  10  222634   34010
   1  13  10 1060648   81313
   2  13  10  775277   60205
   3  13  10 1443379   80140
   4  13  10  102510  133231
   5  13  10  177356   64472
   6  13  10  -18180   48879
   7  13  10   50710   57690
   8  13  10   83877   97196
   9  13  10 -152351  152351
 -10  14  10  212808  115520
  -9  14  10  -97207   97207
  -8  14  10  188152   58394
  -7  14  10   64056   51630
  -6  14  10 1557555  120653
  -5  14  10 1044527   74766
  -4  14  10  957570  100427
  -3  14  10 1522704  103243
  -2  14  10  733120   56553
  -1  14  10  452995   47738
   0  14  10  379740   38864
   1  14  10  306659   40691
   2  14  10  295035   64010
   3  14  10  108868   58766
   4  14  10  110907   61394
   5  14  10  120851  233457
   6  14  10  155222   60346
   7  14  10  106588   67072
   8  14  10  201581  102384
   9  14  10  190891  164023
 -11  15  10  192141  139068
 -10  15  10  782031  138867
  -9  15  10   91451  109081
  -8  15  10  956377  147018
  -7  15  10  130327   58180
  -6  15  10 1224238   86315
  -5  15  10   26924   61182
  -4  15  10  183200   53190
  -3  15  10   64097   38438
  -2  15  10  109407   40850
  -1  15  10   21254   46892
   0  15  10 1242095   84226
   1  15  10   19161   37604
   2  15  10 1554288   85101
   3  15  10   21924  110792
   4  15  10  338085   77584
   5  15  10  -16705   56350
   6  15  10   92007   62896
   7  15  10   78981   70648
   8  15  10  -47745  103103
   9  15  10 -119143  174892
 -12  16  10  298432  186363
 -11  16  10 -132829  143495
 -10  16  10   68647  136452
  -9  16  10 -114314  114314
  -8  16  10   89872   66344
  -7  16  10   -2201   60703
  -6  16  10  959453   82752
  -5  16  10  423725   66415
  -4  16  10 1916503   94421
  -3  16  10   13913   55315
  -2  16  10 1468904   63972
  -1  16  10  187811   69132
   0  16  10  768939  153960
   1  16  10   18753   39417
   2  16  10   31644   57232
   3  16  10  -38170   49416
   4  16  10   61493   55227
   5  16  10   22483   54395
   6  16  10  414131   62878
   7  16  10   -1402   69396
   8  16  10  708220  175897
 -12  17  10  228259  194010
 -11  17  10   -9458  161809
 -10  17  10  736081  155168
  -9  17  10  -16703  127595
  -8  17  10  295554  166338
  -7  17  10   84394   66219
  -6  17  10  328781   68858
  -5  17  10  148926   61109
  -4  17  10   27611   76075
  -3  17  10   24691   39754
  -2  17  10  459530   89464
  -1  17  10  213497   79094
   0  17  10  121569   57459
   1  17  10  133568   51330
   2  17  10  823261   73496
   3  17  10  109585   52810
   4  17  10  982333   62500
   5  17  10   44680   57792
   6  17  10  107908   66455
   7  17  10  -58653   84158
   8  17  10  113400  241809
 -12  18  10 -147520  212929
 -11  18  10  191660  182741
 -10  18  10  158400  166640
  -9  18  10   23405  153356
  -8  18  10  -76836   76836
  -7  18  10   65236   72934
  -6  18  10  320044   71603
  -5  18  10  742440   88351
  -4  18  10  175996   66232
  -3  18  10  760091   53400
  -2  18  10  675087   61148
  -1  18  10  299893   61484
   0  18  10   48101   57588
   1  18  10  187590   55660
   2  18  10  -49295   49295
   3  18  10  -19350   51820
   4  18  10   51659   55942
   5  18  10  195082   64040
   6  18  10  175176   71886
   7  18  10  363695  108432
   8  18  10 -193608  193608
   9  18  10  185204  233256
 -12  19  10  -35622  246538
 -11  19  10  615274  126055
 -10  19  10   58993  101900
  -9  19  10  616658  188678
  -8  19  10   83507   84746
  -7  19  10  276860   83594
  -6  19  10   15897   77211
  -5  19  10   69339   70329
  -4  19  10   25682   70314
  -3  19  10  141265   50501
  -2  19  10   64328   54617
  -1  19  10  149980   59615
   0  19  10   48909   92175
   1  19  10  736749   57678
   2  19  10  158373   53784
   3  19  10  722057   63289
   4  19  10   44721  102891
   5  19  10  238247   71334
   6  19  10   77898   98132
   7  19  10  184555  101983
   8  19  10   13883  155577
 -11  20  10  322645  134570
 -10  20  10   15394  255695
  -9  20  10  -44707   99810
  -8  20  10   16521   93986
  -7  20  10  149668   88671
  -6  20  10   24473   82245
  -5  20  10  775983   87903
  -4  20  10   68021   77502
  -3  20  10  746047   61957
  -2  20  10  118295   98567
  -1  20  10  600917  103043
   0  20  10  -59661   59661
   1  20  10  356395   57447
   2  20  10  -75323   75323
   3  20  10  -61440   61440
   4  20  10   64751   68202
   5  20  10  272180   76173
   6  20  10   77139  185311
   7  20  10  206906  113089
   8  20  10  132400  233659
 -10  21  10  159250  229332
  -9  21  10  525623  150136
  -8  21  10  208630  103679
  -7  21  10  415379  109583
  -6  21  10  -90842   90842
  -5  21  10   13804   84328
  -4  21  10  149785   86069
  -3  21  10  -13817   66204
  -2  21  10   31508   62908
  -1  21  10   96547   73966
   0  21  10   22825   67884
   1  21  10  921079   67954
   2  21  10   78145   62800
   3  21  10  409433   70235
   4  21  10  124207   75464
   5  21  10  212008   95909
   6  21  10  213666  109893
   7  21  10  132397  225782
 -10  22  10  214960  179118
  -9  22  10  -36685  123944
  -8  22  10   39894  113553
  -7  22  10  142641  126188
  -6  22  10  386691  149432
  -5  22  10  347556  154061
  -4  22  10  841787  103144
  -3  22  10  203766   67845
  -2  22  10  511679  106565
  -1  22  10  -50375   74271
   0  22  10  134698   75377
   1  22  10  107491   66314
   2  22  10   26472   69509
   3  22  10   65245   75319
   4  22  10   21824   94103
   5  22  10 -178951  178951
   6  22  10  156575  122119
   7  22  10  168149  130638
 -10  23  10  453255  205281
  -9  23  10  -96803  166238
  -8  23  10  643214  157381
  -7  23  10   57041  115221
  -6  23  10  270148  113310
  -5  23  10    6055  226614
  -4  23  10 -101309  101309
  -3  23  10   45185   98146
  -2  23  10  183169   76986
  -1  23  10  -22925   80333
   0  23  10  477840   86576
   1  23  10   92863   72840
   2  23  10  515252   80958
   3  23  10   46504   82134
   4  23  10  480370  107993
   5  23  10   12970  117428
   6  23  10  211485  131932
  -9  24  10  -47495  194615
  -8  24  10   93182  171068
  -7  24  10   92594  162414
  -6  24  10  134242  157985
  -5  24  10   36303  184250
  -4  24  10  794719  124843
  -3  24  10  -15411   83223
  -2  24  10  471646   86589
  -1  24  10  122100  104686
   0  24  10  100627   93140
   1  24  10   32706   80548
   2  24  10   35172   84269
   3  24  10  -23436  104322
   4  24  10   44114  158255
   5  24  10  244526  223092
   6  24  10  268083  214538
  -8  25  10  229717  197633
  -7  25  10   94940  185156
  -6  25  10  284814  173281
  -5  25  10  -31597  159998
  -4  25  10    6201  158992
  -3  25  10  -89805  103995
  -2  25  10   77173  106386
  -1  25  10  150212  113910
   0  25  10  305130  133935
   1  25  10  110762  124250
   2  25  10  294633  127509
   3  25  10  211971  133880
   4  25  10  151877  197231
   5  25  10 -128603  207092
  -6  26  10  243755  191997
  -5  26  10  240380  190388
  -4  26  10  129988  117597
  -3  26  10  225141  122669
  -2  26  10 -112796  177708
  -1  26  10  207248  128343
   0  26  10  110365  136642
   1  26  10   47194  260022
   2  26  10   47848  164426
  -4  27  10   96450  158992
  -3  27  10 -153558  183746
  -2  27  10 -168048  186363
  -1  27  10  177348  210513
  -3  28  10  312083  196829
  -2  28  10 -211721  211721
  -3   0  11 2386155   70640
  -1   0  11  957732   38623
   1   0  11  145442   28339
   3   0  11   73835   31433
   7   0  11  777331   63766
   9   0  11  614341  121558
  -3   1  11  394797   28742
  -2   1  11  868303   73055
  -1   1  11 2002244   39261
   0   1  11   72207   16971
   1   1  11 2231500   37447
   2   1  11  460587   25261
   3   1  11 1407538   39179
   4   1  11   18564   25228
   5   1  11   55952   27523
   6   1  11   43195   33464
   7   1  11   32670   39250
   8   1  11   19420   45960
   9   1  11  154943   78301
  10   1  11  -26839   91571
  -4   2  11  932556   53132
  -3   2  11 2001371   46248
  -2   2  11 1198628   42829
  -1   2  11  100856   20836
   0   2  11   60211   16505
   1   2  11  236007   20422
   2   2  11   36547   24866
   3   2  11   27077   21800
   4   2  11  140624   26307
   6   2  11  929453   43058
   7   2  11  265218   40879
   8   2  11  520656   50135
   9   2  11   94390   75248
  10   2  11  270598   96111
  -4   3  11  274150   39044
  -3   3  11  361360   29100
  -2   3  11  907566   31523
  -1   3  11  291064   23050
   0   3  11 3385987   49676
   1   3  11  181887   19985
   2   3  11 1234425   35485
   3   3  11  175829   23977
   4   3  11  641104   32139
   5   3  11     503   28301
   6   3  11   44911   34551
   7   3  11   -9790   39072
   8   3  11  264463   62778
   9   3  11   96947   80967
  10   3  11  442907  119646
  -4   4  11 2921234   72251
  -3   4  11  382767   30376
  -2   4  11  527325   27714
  -1   4  11   30870   19633
   0   4  11  115819   22357
   1   4  11  125303   24277
   2   4  11  132136   21711
   3   4  11  280817   26035
   4   4  11  640445   69601
   5   4  11   33865   29529
   6   4  11  710755   47610
   7   4  11   26388   39879
   8   4  11  887649   66109
   9   4  11   87942   80448
  10   4  11  223065   97046
  -4   5  11   66267   33408
  -3   5  11  563805   41055
  -2   5  11 2142700   39527
  -1   5  11  999929   65416
   0   5  11 2356364   45304
   1   5  11 1242142   47711
   2   5  11  670154   31344
   3   5  11   99740   24313
   4   5  11  876816   50033
   5   5  11  141077   87932
   6   5  11   34313   34958
   7   5  11   30967   40648
   8   5  11   48422   48848
   9   5  11   34743   75983
  10   5  11  358141  132427
  -4   6  11  949728   60980
  -3   6  11  847288   62188
  -2   6  11  342145   30169
  -1   6  11   34747   21374
   0   6  11   50376   22646
   1   6  11   -6359   22400
   2   6  11    9768   26605
   3   6  11  462914   35648
   4   6  11  186900   68409
   5   6  11  476856   53955
   6   6  11  550097   41783
   7   6  11  598010   91475
   8   6  11  280753   60707
   9   6  11  350830   84861
  -4   7  11   12501   36829
  -3   7  11  891967   64603
  -2   7  11   22655   21824
  -1   7  11 2532308   47380
   0   7  11   11022   22811
   1   7  11 1095794   42720
   2   7  11  812459   44489
   3   7  11 1504979   75475
   4   7  11   29017   44898
   5   7  11  562816   57689
   6   7  11  140455   37364
   7   7  11   73610   43548
   8   7  11   38121   50864
   9   7  11  -51340   85244
  -4   8  11   63537   38842
  -3   8  11 2131706   83119
  -2   8  11  113352   24328
  -1   8  11  245183   25488
   0   8  11   28674   24127
   1   8  11   17316   26594
   2   8  11   63009   29901
   3   8  11  368276   37932
   4   8  11   28820   46964
   5   8  11  482254   58009
   6   8  11  -40348   59271
   7   8  11 1147867   56778
   8   8  11    8766   52998
   9   8  11  585779  196728
  -5   9  11   23434   45080
  -4   9  11  -42264   42264
  -3   9  11  325185   52125
  -2   9  11  571165   38942
  -1   9  11 1415011   43545
   0   9  11  741854   42429
   1   9  11 1977415   53502
   2   9  11  117444   32389
   3   9  11 1466866   59310
   4   9  11  441554   54446
   5   9  11  604877   89659
   6   9  11   34597   48382
   7   9  11   44392   70041
   8   9  11    -471   64895
   9   9  11  387521  101602
  -5  10  11  644220   59571
  -4  10  11  637981   59973
  -3  10  11   63311   49307
  -2  10  11 1001186   47507
  -1  10  11  519623   36238
   0  10  11   11216   27482
   1  10  11    8954   28341
   2  10  11  371616   38395
   3  10  11  181154   39195
   4  10  11  304480  108678
   5  10  11   98393   56111
   6  10  11  735624   58814
   7  10  11  466835   62488
   8  10  11  156345   69740
   9  10  11  352650  143696
  -6  11  11  123053   54138
  -5  11  11  -33610   47495
  -4  11  11   -1006   49911
  -3  11  11   60940   49911
  -2  11  11 1243583   54673
  -1  11  11   13479   26742
   0  11  11 1098595   49939
   1  11  11   91013   32404
   2  11  11 2767606   77954
   3  11  11    8519   38620
   4  11  11  596404   61283
   5  11  11   16455   60603
   6  11  11   62721   55114
   7  11  11   54110   62328
   8  11  11   -2042   72355
  -8  12  11 1075483  120150
  -5  12  11   20703   54540
  -4  12  11  337004   60578
  -3  12  11  107436   54540
  -2  12  11  576968   46605
  -1  12  11   16626   30177
   0  12  11   22101   38533
   1  12  11   35463   33701
   2  12  11  184260   39119
   3  12  11   -5970   41617
   4  12  11  123643   58828
   5  12  11  250323   75169
   6  12  11  441857   60652
   7  12  11  -64440   64440
   8  12  11  460902   93776
  -8  13  11  827683  101634
  -7  13  11  220488   82314
  -6  13  11  155703   65408
  -5  13  11  109248   59973
  -4  13  11  185848   62992
  -3  13  11  107356   62389
  -2  13  11   35806   54239
  -1  13  11  384911  129106
   0  13  11 1943400   61095
   1  13  11  304667   39954
   2  13  11 1260960   63026
   3  13  11  426481  102641
   4  13  11  477602   68339
   5  13  11   16565   66639
   6  13  11  141490   62973
   7  13  11   27414   65303
   8  13  11   89171   74651
   9  13  11  198610  165030
 -10  14  11  -65810  112502
  -8  14  11  201252   93784
  -7  14  11  249383   92578
  -6  14  11  236314   66816
  -5  14  11  833200   81105
  -4  14  11  704364   78289
  -3  14  11  386070   77282
  -2  14  11  607283   54971
  -1  14  11  194016   43750
   0  14  11   81177   37647
   1  14  11  -17046   36589
   2  14  11   21104   60254
   3  14  11   52134   61082
   4  14  11   51603   86440
   5  14  11  115575   59025
   6  14  11  110176   59465
   7  14  11  373824   68841
   8  14  11  236986   90221
 -10  15  11  -24552  121960
  -9  15  11  551039  121759
  -8  15  11   56749  110490
  -7  15  11  705378   67773
  -6  15  11   50798   58135
  -5  15  11   26607   52765
  -4  15  11  268878   77484
  -3  15  11  340878   78690
  -2  15  11   74761   44994
  -1  15  11  986234   66315
   0  15  11  169211   46385
   1  15  11 1681271   97167
   2  15  11  -54391   67822
   3  15  11  613085   58129
   4  15  11  191258   56208
   5  15  11  235956   58022
   6  15  11  -61275   61275
   7  15  11  -12115   70179
   8  15  11  213900  128598
 -12  16  11 -180929  180929
 -11  16  11   16900  155369
 -10  16  11 -118540  129407
  -9  16  11  114705  127394
  -8  16  11   71800   68801
  -7  16  11  690245   73921
  -6  16  11   82742   73659
  -5  16  11  329272   64146
  -4  16  11   -2394  112603
  -3  16  11 1336233  117533
  -2  16  11   79521   67822
  -1  16  11  204997   52083
   0  16  11   37464   43067
   1  16  11   44052   44850
   2  16  11   56978   92276
   3  16  11   45259   48089
   4  16  11   14599   56384
   5  16  11  730154   65378
   6  16  11   21591   66809
   7  16  11  881414   94790
   8  16  11  -45598  114986
   9  16  11  233877  218563
 -12  17  11   52316  194211
 -11  17  11  814081  181733
 -10  17  11   68007  151545
  -9  17  11  386458   86786
  -8  17  11   44499   73796
  -7  17  11  191561   74028
  -6  17  11  182971   91973
  -5  17  11  -46876   64207
  -4  17  11  174320   77584
  -3  17  11  285438   68369
  -2  17  11   40515   44630
  -1  17  11  729960  147018
   0  17  11  429027   64786
   1  17  11  470649   60041
   2  17  11  522850   53497
   3  17  11  295033   54761
   4  17  11  115243   61234
   5  17  11   59596   62928
   6  17  11  -31492   70613
   7  17  11   29626   95096
   8  17  11   76341  157482
   9  17  11  352952  240703
 -12  18  11  127091  221986
 -11  18  11  208530  187570
 -10  18  11   97742  167243
  -9  18  11   23175   89230
  -8  18  11  231532   86728
  -7  18  11  125415   76346
  -6  18  11  455720   78902
  -5  18  11  479278   76590
  -4  18  11  610116   93282
  -3  18  11  141283   49827
  -2  18  11  156242   49622
  -1  18  11  352718   61960
   0  18  11   65109   64423
   1  18  11   38645   48891
   2  18  11   -8327   76369
   3  18  11  192877   57896
   4  18  11  347005   64728
   5  18  11  168072   71414
   6  18  11  396971  109293
   7  18  11  233411  105432
   8  18  11  295866  161454
 -12  19  11  443367  298663
 -11  19  11  -83119  210112
 -10  19  11  662880  113582
  -9  19  11  146496  153759
  -8  19  11  301566   91965
  -7  19  11  -22789   83019
  -6  19  11  248921   80398
  -5  19  11  -44967   72744
  -4  19  11   91542   75715
  -3  19  11    -960   50307
  -2  19  11  192952  104735
  -1  19  11  -54702   61121
   0  19  11  906226   84751
   1  19  11  -44248   56326
   2  19  11  661133   61342
   3  19  11  128820   62686
   4  19  11  103757   69295
   5  19  11   75341   74320
   6  19  11  -56386  118441
   7  19  11  189473  142819
   8  19  11  -23683  144828
 -11  20  11 -128235  142040
 -10  20  11   42019  121226
  -9  20  11  119724  106802
  -8  20  11   23412   98878
  -7  20  11  -90600   90600
  -6  20  11  381165   96120
  -5  20  11  138446  129809
  -4  20  11  560706   91695
  -3  20  11   69823   57647
  -2  20  11  124980  141530
  -1  20  11   47814   84728
   0  20  11   76376   54515
   1  20  11   38628   57766
   2  20  11  -62221   67828
   3  20  11   16685   66466
   4  20  11  367509   84153
   5  20  11   18741  106547
   6  20  11  588377  131761
   7  20  11  101311  123672
 -11  21  11   73890  187570
 -10  21  11  327739  144603
  -9  21  11  207499  187670
  -8  21  11  488206  111580
  -7  21  11  -96763   96763
  -6  21  11  277614   96420
  -5  21  11   50078  100326
  -4  21  11   30538   86705
  -3  21  11  113606  157784
  -2  21  11  181557  110086
  -1  21  11  246523   70484
   0  21  11  549520   64482
   1  21  11  131395   63084
   2  21  11  546557   71371
   3  21  11  277812   75882
   4  21  11   94473   97446
   5  21  11  118266  105617
   6  21  11  -77370  119221
   7  21  11   61441  255707
 -10  22  11   -8452  190186
  -9  22  11  314664  166439
  -8  22  11   -7433  240401
  -7  22  11  124879  110966
  -6  22  11  -97446  101983
  -5  22  11  675730  167645
  -4  22  11  368241  103795
  -3  22  11  294218   72038
  -2  22  11   51491  144420
  -1  22  11  235313   77716
   0  22  11  -31058   64292
   1  22  11  -10359   70510
   2  22  11  -73525   73525
   3  22  11  103420   80764
   4  22  11  113845  295687
   5  22  11  144477  116740
   6  22  11  232063  162672
 -10  23  11  115888  203670
  -9  23  11  494621  178514
  -8  23  11   28038  154967
  -7  23  11  108168  149532
  -6  23  11   61398  152150
  -5  23  11 -108047  108047
  -4  23  11  109478  109953
  -3  23  11  194668  113333
  -2  23  11   50079   82409
  -1  23  11  368766   88253
   0  23  11   47322   72130
   1  23  11  815956   83641
   2  23  11   22365   83579
   3  23  11  305103  114986
   4  23  11   77439  113359
   5  23  11   95548  178917
   6  23  11  293109  214137
  -9  24  11  118688  201256
  -8  24  11  -64603  173683
  -7  24  11  257499  166640
  -6  24  11 -101433  154364
  -5  24  11  889754  165231
  -4  24  11  -92184  187570
  -3  24  11  284123  110443
  -2  24  11   89346   88763
  -1  24  11   72322   92910
   0  24  11   84373   94903
   1  24  11   51404   93723
   2  24  11   37017  156577
   3  24  11  137145  166640
   4  24  11 -149532  202060
   5  24  11  117630  205080
  -8  25  11 -189381  189381
  -7  25  11   52222  197633
  -6  25  11  130406  181733
  -5  25  11  193236  173884
  -4  25  11  101347  171268
  -3  25  11  -29269  109443
  -2  25  11   62357  114256
  -1  25  11  281543  157784
   0  25  11  147438   99280
   1  25  11  356689  130030
   2  25  11  195514  181131
   3  25  11 -151344  168048
  -5  26  11  189490  184552
  -4  26  11  316909  183545
  -3  26  11  229296  124615
  -2  26  11  197349  127178
  -1  26  11 -162414  194010
   0  26  11 -138464  183143
  -3  27  11  -97609  183545
  -2  27  11  416620  202060
  -1  27  11 -105457  193406
  -2  28  11  230710  208502
  -2   0  12 1441833   69030
   0   0  12  519737   37533
   2   0  12 1603795   55704
   6   0  12 1997850   88309
   8   0  12  471537   78266
  -4   1  12  444846   31236
  -3   1  12    4984   25330
  -2   1  12 2791640   57846
  -1   1  12  370906   44095
   0   1  12 1889448   43704
   1   1  12  232347   21133
   2   1  12 1237071   43994
   3   1  12   35339   24750
   4   1  12   66088   41867
   5   1  12   59285   47764
   6   1  12   49927   36802
   7   1  12  167756   44502
   8   1  12   52270   52039
   9   1  12   65286   88514
  -4   2  12 1166050   43258
  -3   2  12  138735   28451
  -2   2  12  682991   43539
  -1   2  12  132165   21380
   0   2  12   47066   18411
   1   2  12   13506   25767
   2   2  12  115036   25679
   3   2  12  440451   29977
   4   2  12  895050   58141
   5   2  12  726402   78891
   6   2  12  484616   40773
   7   2  12  552905   48729
   8   2  12   80159   52650
   9   2  12  -10719  114515
  -4   3  12  544123   45483
  -3   3  12 2279813   61584
  -2   3  12  355807   24786
  -1   3  12 1527815   39154
   0   3  12  204748   24880
   1   3  12 1222524   34727
   2   3  12   99608   22866
   3   3  12  427977   30510
   4   3  12   34113   88050
   5   3  12   14162   48244
   6   3  12   26217   37420
   7   3  12  330731   55860
   8   3  12   25345   52216
   9   3  12  235446   90915
  -4   4  12   11587   25752
  -3   4  12  736422   43604
  -2   4  12   -8991   19427
  -1   4  12   29516   21641
   0   4  12  475095   29480
   1   4  12  255258   27723
   2   4  12  387712   27001
   3   4  12  639952   33177
   4   4  12   -6923   44367
   5   4  12 1665380   82717
   6   4  12   21311   38610
   7   4  12  382576   59723
   8   4  12   73817   53672
   9   4  12  150723   99421
  -4   5  12  272139   44276
  -3   5  12 1295773   65105
  -2   5  12  398726   28151
  -1   5  12 1052138   37376
   0   5  12   77967   24466
   1   5  12  708785   38988
   2   5  12  131855   31017
   3   5  12  758320   56296
   4   5  12   84798   48542
   5   5  12   86013   53516
   6   5  12   38104   40777
   7   5  12  121886   46845
   8   5  12   49692   74272
   9   5  12  232902   79030
  -4   6  12  717479   63797
  -3   6  12  818975   47942
  -2   6  12  237847   24213
  -1   6  12   63096   22880
   0   6  12    8547   24352
   1   6  12  206695   28827
   2   6  12  410696   35026
   3   6  12  852494   49016
   4   6  12  712937   58165
   5   6  12  449414   59129
   6   6  12  694391   47348
   7   6  12  295079   50489
   8   6  12  388334   69020
   9   6  12   47458   92819
  -5   7  12  144077   45080
  -4   7  12  885329   69634
  -3   7  12   39555   30310
  -2   7  12  814422   37532
  -1   7  12  152924   25380
   0   7  12  724758   37707
   1   7  12   28242   30960
   2   7  12  943470   61900
   3   7  12   40747   46254
   4   7  12  254963   54017
   5   7  12   87835   55927
   6   7  12   12062   49905
   7   7  12   15765   52288
   8   7  12  278847   59838
   9   7  12   43293   98338
  -4   8  12 2080990   84728
  -3   8  12   15102   45483
  -2   8  12  374054   28769
  -1   8  12    6140   25845
   0   8  12  -26104   26104
   1   8  12  110236   30173
   2   8  12  788875   41551
   3   8  12   35915   36979
   4   8  12 1839489  294839
   5   8  12  -34495   54392
   6   8  12  445570   57684
   7   8  12   10552   57846
   8   8  12  364413   62453
   9   8  12 -149131  149131
  -6   9  12  182930   53132
  -5   9  12    7509   46289
  -4   9  12 1068670   78289
  -3   9  12 1042946   80904
  -2   9  12  932806   42375
  -1   9  12  401419   31645
   0   9  12  649997   40469
   1   9  12  184920   33042
   2   9  12  979784   54567
   3   9  12  333358   42129
   4   9  12  229187   53983
   5   9  12   27085   59879
   6   9  12   -1982   68917
   7   9  12   99950   90502
   8   9  12  346221  103281
   9   9  12   11323  155369
  -5  10  12 1004067   82314
  -4  10  12  260962   58565
  -3  10  12  977180   84929
  -2  10  12   61865   27004
  -1  10  12  120198   29286
   0  10  12   17627   30423
   1  10  12     -36   33414
   2  10  12  412350   40604
   3  10  12  546275  142864
   4  10  12  491847   63523
   5  10  12 1271025   87189
   6  10  12  431234   59795
   7  10  12  134269   65583
   8  10  12  270389   78669
   9  10  12   53722  155570
  -6  11  12  264560   63596
  -5  11  12  606794   68025
  -4  11  12   37158   52327
  -3  11  12   71058   53132
  -2  11  12   13342   32464
  -1  11  12  369271   34723
   0  11  12  731128   44164
   1  11  12  765658   44676
   2  11  12  219735   41545
   3  11  12   94058   43775
   4  11  12   -8066   59083
   5  11  12  -13866  112100
   6  11  12  -57609   57609
   7  11  12   77222   68183
   8  11  12  -20886   77644
   9  11  12  305847  168452
  -7  12  12 1454679  103243
  -6  12  12   42256   62389
  -5  12  12 1723316  101030
  -4  12  12  107869   56553
  -3  12  12  580168   47548
  -2  12  12  199561   37989
  -1  12  12  125101   33891
   0  12  12  408537   39897
   1  12  12  104223   37604
   2  12  12   77902   49151
   3  12  12  585400   90866
   4  12  12   68596   64021
   5  12  12  721185   63936
   6  12  12   -5102   61996
   7  12  12  466743   74626
   8  12  12  -11641   89001
   9  12  12  233760  175093
  -9  13  12  189700   99621
  -8  13  12  132782   96402
  -7  13  12  104890   68628
  -6  13  12  -62791   62791
  -5  13  12  300239   68025
  -4  13  12   57248   60778
  -3  13  12  280663   68226
  -2  13  12  161164   39586
  -1  13  12  815286   47476
   0  13  12  595777   44480
   1  13  12  682241   47276
   2  13  12  518978   62064
   3  13  12  346772   62934
   4  13  12  -39698   52422
   5  13  12   59885   97838
   6  13  12   22442   66885
   7  13  12   49120   69140
   8  13  12   15842  159269
   9  13  12  -49448  142440
 -10  14  12   99067  127998
  -8  14  12  506595  108880
  -7  14  12 1010107   81116
  -6  14  12 1002054   91571
  -5  14  12   63838   68025
  -4  14  12  296381   71245
  -3  14  12   92059   65810
  -2  14  12  -49307   49307
  -1  14  12  275275   57905
   0  14  12   33807   39769
   1  14  12  -24397   47995
   2  14  12  207778   61260
   3  14  12   61780   51357
   4  14  12  813135   66527
   5  14  12  168802   63508
   6  14  12  352276  126447
   7  14  12  153005   74155
   8  14  12  259413  101069
   9  14  12  -73055  198841
 -11  15  12  -19924  154161
 -10  15  12  444172  136048
  -9  15  12  -81709  120754
  -8  15  12  321462  114515
  -7  15  12  -43797   61065
  -6  15  12   77563   59641
  -5  15  12   91583   75671
  -4  15  12  298695   79496
  -3  15  12  347702   82515
  -2  15  12  689991   55460
  -1  15  12  142240   42747
   0  15  12  498558   49680
   1  15  12  124376   46414
   2  15  12   89630   62826
   3  15  12   86856   56365
   4  15  12  103191   74745
   5  15  12  -44313   87291
   6  15  12   37852   69125
   7  15  12   36245   91090
   8  15  12  333346  108073
   9  15  12   59836  217759
 -11  16  12  -11472  167043
 -10  16  12  101601  143293
  -9  16  12 -119344  131018
  -8  16  12  660243   79777
  -7  16  12   19739  105457
  -6  16  12  747354   77708
  -5  16  12  -15125   75370
  -4  16  12  791541   96201
  -3  16  12   29565   62188
  -2  16  12  151265   53561
  -1  16  12   17820   76841
   0  16  12   74697   46145
   1  16  12  -26170   61602
   2  16  12  499581   59564
   3  16  12   -9036   57517
   4  16  12  652543   63702
   5  16  12  -19657   65346
   6  16  12  908230   79729
   7  16  12   24990   96544
   8  16  12  174786  202743
   9  16  12  136013  235871
 -12  17  12  491573  210513
 -11  17  12  266025  186363
 -10  17  12  321608  155973
  -9  17  12   47236  121056
  -8  17  12  129972   83822
  -7  17  12   24967  115923
  -6  17  12  -85734   85734
  -5  17  12    9168   70971
  -4  17  12  538087   72920
  -3  17  12   79470   46676
  -2  17  12  716522   64001
  -1  17  12  139043   59788
   0  17  12  481531   68622
   1  17  12  187052   54752
   2  17  12  487662   56478
   3  17  12   48036   57903
   4  17  12  100582   78286
   5  17  12  -12590   69594
   6  17  12   22857   92171
   7  17  12 -105885  105885
   8  17  12   99750  120967
 -12  18  12   89031  236879
 -11  18  12  226767  198841
 -10  18  12 -120955  170263
  -9  18  12  221969  140879
  -8  18  12   94296   86704
  -7  18  12  254541   80609
  -6  18  12  209531  156879
  -5  18  12  470003  147018
  -4  18  12  417733   88050
  -3  18  12  308733  114111
  -2  18  12   72052   55022
  -1  18  12   65743   70841
   0  18  12  -17716   63564
   1  18  12  327781   54352
   2  18  12   81366   57194
   3  18  12  295829   64335
   4  18  12  591631   90341
   5  18  12  371924   79597
   6  18  12  318370  101723
   7  18  12  403346  115069
   8  18  12  -20011  149218
 -11  19  12  646425  137333
 -10  19  12  -48314  114104
  -9  19  12  495660  173784
  -8  19  12   38867   97229
  -7  19  12  136335   87407
  -6  19  12  123120   86226
  -5  19  12   54632   79535
  -4  19  12   -7998   79094
  -3  19  12  350714   65284
  -2  19  12   33978   58121
  -1  19  12  746848   92070
   0  19  12  -53163   53163
   1  19  12  260876   59365
   2  19  12   66476   62765
   3  19  12  -49126   66710
   4  19  12   -3254   78403
   5  19  12  -36976  138406
   6  19  12    -835  109130
   7  19  12  132842  139418
 -11  20  12  -36226  174489
 -10  20  12  -42401  123457
  -9  20  12  278447  114929
  -8  20  12   22423  103869
  -7  20  12  400906  138061
  -6  20  12   -3911  111696
  -5  20  12  555550  120351
  -4  20  12  116842   85250
  -3  20  12  233477   89277
  -2  20  12    9919   62211
  -1  20  12   83682   65154
   0  20  12   30391   58652
   1  20  12  163054   63396
   2  20  12  -82817   82817
   3  20  12  792525   79411
   4  20  12   23326   79157
   5  20  12  567641  159606
   6  20  12   45479  119191
   7  20  12  452303  150856
 -10  21  12  246508  172073
  -9  21  12  196335  280954
  -8  21  12   23863  110795
  -7  21  12  197666  122364
  -6  21  12    9073  153156
  -5  21  12   68821   95678
  -4  21  12  113745   97326
  -3  21  12  148348   67917
  -2  21  12  307611  149030
  -1  21  12  166232  120904
   0  21  12  295594   68467
   1  21  12  407234  101873
   2  21  12   65083   75021
   3  21  12   46833   80510
   4  21  12  -41723  102923
   5  21  12    5690  115296
   6  21  12   41433  129565
 -10  22  12  200117  189784
  -9  22  12  156603  169457
  -8  22  12  322315  128793
  -7  22  12  353440  116319
  -6  22  12  549275  226212
  -5  22  12  199471  111243
  -4  22  12  406337  106506
  -3  22  12  102902  109281
  -2  22  12  -58135   75635
  -1  22  12  -36864   78720
   0  22  12    7043   69889
   1  22  12   52926   75885
   2  22  12  174946   81144
   3  22  12  -98855   98855
   4  22  12  145551  135431
   5  22  12  -14213  140664
   6  22  12  137072  212728
  -9  23  12 -175494  175494
  -8  23  12  236350  163218
  -7  23  12 -108075  151545
  -6  23  12 -146917  146917
  -5  23  12   32130  116264
  -4  23  12  194748  119511
  -3  23  12   74140  115875
  -2  23  12  526781   89236
  -1  23  12   72609  127314
   0  23  12  516800   81904
   1  23  12   80610   83600
   2  23  12  257746   96022
   3  23  12  -74386  131460
   4  23  12  136982  195821
   5  23  12   26430  202665
  -8  24  12  212635  188577
  -7  24  12 -171469  171469
  -6  24  12  661244  180326
  -5  24  12 -160200  160200
  -4  24  12  540584  174288
  -3  24  12  -40476  102866
  -2  24  12  142837  110781
  -1  24  12 -101452  167444
   0  24  12   -8516   98340
   1  24  12  -58902  100352
   2  24  12  224523  130730
   3  24  12  -39647  175897
  -7  25  12   97665  192401
  -6  25  12   45425  191193
  -5  25  12  165226  193005
  -4  25  12  135013  187972
  -3  25  12  179975  188477
  -2  25  12  386014  122226
  -1  25  12  235639  139268
   0  25  12  375055  108507
  -3  26  12  181215  176904
  -2  26  12  103886  180929
  -1  26  12  292562  206890
  -3  27  12  157056  189181
  -2  27  12 -178111  208703
  -3   0  13  711523   66011
  -1   0  13  792447   68427
   1   0  13  328838   37479
   3   0  13 1357133   89759
   5   0  13  636975   88753
   7   0  13  550202  108075
   9   0  13  -91759   91759
  -4   1  13  133288   29095
  -3   1  13 2539095   71446
  -2   1  13    5623   28785
  -1   1  13 2458633   46826
   0   1  13  670964   30792
   1   1  13 1438067   39757
   2   1  13   49666   28002
   3   1  13  371245   31433
   4   1  13  -17508   47816
   5   1  13   89079   55345
   6   1  13  -18183   41525
   7   1  13  210072   56848
   8   1  13   68707   58986
   9   1  13  440213   84214
  -4   2  13  311816   32304
  -3   2  13   29798   54239
  -2   2  13   54739   22177
  -1   2  13  261781   26020
   0   2  13  294393   22767
   1   2  13  667584   34264
   2   2  13   60096   25610
   3   2  13  183021   30247
   4   2  13  610091   59873
   5   2  13  752393   63783
   6   2  13   57997   42420
   7   2  13  248375   61264
   8   2  13  126353   68940
   9   2  13   53935   85536
  -5   3  13  353809   45483
  -4   3  13  565322   36675
  -3   3  13  242715   33420
  -2   3  13 1796913   42226
  -1   3  13  305080   27120
   0   3  13 2240006   49523
   1   3  13  449756   28001
   2   3  13  623353   32051
   3   3  13  137217   29500
   4   3  13  -26114   53734
   5   3  13   44047   55554
   6   3  13  133600   43298
   7   3  13   14222   48927
   8   3  13  465489   64246
  -4   4  13  348595   40251
  -3   4  13  168866   32477
  -2   4  13   -8169   30663
  -1   4  13   96505   30642
   0   4  13  646420   36060
   1   4  13    2464   27066
   2   4  13 1043198   42091
   3   4  13   50236   29192
   4   4  13  908489   62046
   5   4  13  -54991   54991
   6   4  13  753605   51016
   7   4  13   40667   49926
   8   4  13   84221   81482
   9   4  13  -37030  144098
  -4   5  13  703204   47388
  -3   5  13  361179   35220
  -2   5  13 1324662   40501
  -1   5  13  139194   24633
   0   5  13  688231   36714
   1   5  13 1030078   46957
   2   5  13 1050790   51853
   3   5  13   17258   32127
   4   5  13   59786   50917
   5   5  13  279000   61366
   6   5  13   65320   49004
   7   5  13  193833   74567
   8   5  13  323416   64713
   9   5  13  120191  152150
  -5   6  13 1330389   74264
  -4   6  13  427503   69936
  -3   6  13   35125   38842
  -2   6  13    5609   23103
  -1   6  13   76020   26527
   0   6  13  356360   31045
   1   6  13  -26042   29627
   2   6  13  821448   43439
   3   6  13  847942   50010
   4   6  13  269207   54559
   5   6  13  154960   74866
   6   6  13  310859   48104
   7   6  13   73385   52684
   8   6  13  119393   64560
   9   6  13   34463  186263
  -4   7  13  146342   47295
  -3   7  13 1256578   78690
  -2   7  13  214972   27127
  -1   7  13 1021869   44385
   0   7  13  105963   34698
   1   7  13  118654   34310
   2   7  13  101732   34964
   3   7  13   61397   40052
   4   7  13   51152   55583
   5   7  13   40522   60546
   6   7  13   48115   58030
   7   7  13  478327   57965
   8   7  13   30092  103314
   9   7  13  562193  169859
  -5   8  13 1099588   80703
  -4   8  13  -12880   48904
  -3   8  13   44555   35501
  -2   8  13   90974   26464
  -1   8  13    8403   26533
   0   8  13   12116   35485
   1   8  13 1002133   52694
   2   8  13   10936   36508
   3   8  13 1583869  213130
   4   8  13   -7216   56200
   5   8  13  541768   76377
   6   8  13   -8843   57184
   7   8  13  262253   68484
   8   8  13  -67650   78007
   9   8  13  -16703  166238
  -5   9  13  125982   52125
  -4   9  13   44728   52528
  -3   9  13 1611841   80703
  -2   9  13  540131   34023
  -1   9  13 1013242   48010
   0   9  13  189246   34139
   1   9  13  823333   50658
   2   9  13   80052   71998
   3   9  13  -13616   62030
   4   9  13   -8844   56289
   5   9  13   42729   65207
   6   9  13   -5918   58739
   7   9  13  287045   71407
   8   9  13   94943   85353
   9   9  13  255350  178111
  -5  10  13  542637   68628
  -4  10  13  710288   85534
  -3  10  13  -55948   55948
  -2  10  13   27240   29607
  -1  10  13   63825   31930
   0  10  13   63266   34301
   1  10  13  493585   44188
   2  10  13  991429   80158
   3  10  13  423844   61620
   4  10  13  696454   70383
   5  10  13  170327   57555
   6  10  13  150340   63815
   7  10  13  278536   99378
   8  10  13    9850  104817
   9  10  13 -134842  180929
  10  10  13 -167043  241508
  -5  11  13   72058   58766
  -4  11  13 1781722  103445
  -3  11  13   40514   59169
  -2  11  13  884433   46379
  -1  11  13  132954   35041
   0  11  13 1300049   57378
   1  11  13   30935   37682
   2  11  13   71287   41194
   3  11  13  -41841   57339
   4  11  13   40367   51079
   5  11  13  -21411   56409
   6  11  13  168256   75191
   7  11  13  151293   77996
   8  11  13  186577  109373
   9  11  13   64051  193406
  -7  12  13   45081   65207
  -6  12  13 1156016  104653
  -5  12  13  -51320   59371
  -4  12  13  209523   68025
  -3  12  13  112974   66011
  -2  12  13   14753   31307
  -1  12  13   35542   34995
   0  12  13  323362   41076
   1  12  13   84427   41501
   2  12  13  559237  113809
   3  12  13  -49002   49002
   4  12  13  825498   63901
   5  12  13  -51690   66165
   6  12  13  165743   69607
   7  12  13    4726   78389
   8  12  13  165690   99836
   9  12  13   44089  206287
  -6  13  13  119579   71646
  -5  13  13  372860   72854
  -4  13  13  295092   73257
  -3  13  13  487039   77484
  -2  13  13 1423717   58603
  -1  13  13  112016   38385
   0  13  13 1140941   63586
   1  13  13  210858   42604
   2  13  13  200588  160401
   3  13  13  -50255   50255
   4  13  13  -40841   71294
   5  13  13  -11223   63959
   6  13  13  126798   75438
   7  13  13  128894  105133
   8  13  13  223697  107396
   9  13  13   83302  217357
  -9  14  13  694744  128402
  -8  14  13  542262  120754
  -7  14  13 1020295  102439
  -6  14  13  318417   80904
  -5  14  13   -9056   69835
  -4  14  13  104948   71847
  -3  14  13    7728   63797
  -2  14  13    4921   70440
  -1  14  13  113109   42100
   0  14  13  217203   46489
   1  14  13  326185  119051
   2  14  13  294208   57528
   3  14  13  555385   62235
   4  14  13   59960   68440
   5  14  13  200577   70854
   6  14  13  204989   81032
   7  14  13  113827  136210
   8  14  13   24828  111385
   9  14  13 -136653  223393
 -10  15  13  231003  138464
  -9  15  13   41641  131018
  -8  15  13  103053   74866
  -7  15  13   61904   66609
  -6  15  13  -51320   77080
  -5  15  13  276353   81105
  -4  15  13   56836   76678
  -3  15  13 1179177  124578
  -2  15  13  509228   56540
  -1  15  13 1306936   76836
   0  15  13   22814   52623
   1  15  13  500416   69820
   2  15  13  133069   65310
   3  15  13   34420   59090
   4  15  13  -55886   65063
   5  15  13   -1814   79834
   6  15  13   41081   76192
   7  15  13  361893  111431
   8  15  13   88718  118047
 -10  16  13  -54942  149532
  -9  16  13  738345   92376
  -8  16  13   66715   84125
  -7  16  13  831019   85950
  -6  16  13  134773   73157
  -5  16  13  193444   86339
  -4  16  13   43826   85734
  -3  16  13  248379   53073
  -2  16  13   36707   54254
  -1  16  13  215023   48657
   0  16  13  -31623   76678
   1  16  13  717722   62977
   2  16  13  -57170   57170
   3  16  13  264614   65439
   4  16  13   15096  102733
   5  16  13  684970   77522
   6  16  13    8774   95552
   7  16  13  146464  110939
   8  16  13  -82269  124881
 -12  17  13 -102439  221181
 -11  17  13 -116326  189985
 -10  17  13  117913  168250
  -9  17  13  171395   93825
  -8  17  13  -45123   80902
  -7  17  13  -77108  100528
  -6  17  13   86407   75976
  -5  17  13  481494   78657
  -4  17  13  221355  100828
  -3  17  13  514395   62289
  -2  17  13  495722   66730
  -1  17  13  619100   73566
   0  17  13  125615   66089
   1  17  13  365368   61219
   2  17  13  126506   64125
   3  17  13  -67509   67509
   4  17  13  -69010   69010
   5  17  13   90663  145041
   6  17  13   18038  103994
   7  17  13  151825  119494
   8  17  13  180927  402211
 -12  18  13 -235670  235670
 -11  18  13   42264  205885
 -10  18  13  470244  184552
  -9  18  13  274311  104643
  -8  18  13  618903  185658
  -7  18  13  174695   86378
  -6  18  13  319266   83603
  -5  18  13   92933  118942
  -4  18  13  148697   80264
  -3  18  13   95996  106565
  -2  18  13   35102   71623
  -1  18  13   51872   60401
   0  18  13  479316   57090
   1  18  13  112220   58886
   2  18  13  302559   64782
   3  18  13  232952   70539
   4  18  13  233746   89440
   5  18  13   89610  102710
   6  18  13  221563  112495
   7  18  13  167577  151806
 -11  19  13   80289  234262
 -10  19  13  287901  120359
  -9  19  13   41152  109402
  -8  19  13   39257   98959
  -7  19  13  -19580   91029
  -6  19  13  266748   92220
  -5  19  13  -87163   87163
  -4  19  13  732393   97196
  -3  19  13  -24807   59728
  -2  19  13  753554  152150
  -1  19  13  -43080   64564
   0  19  13  535274   61791
   1  19  13   80671   62986
   2  19  13   52332   68235
   3  19  13   43082   73747
   4  19  13  -89419   89419
   5  19  13 -114130  114130
   6  19  13  191164  121020
   7  19  13  -33175  128367
 -10  20  13  422224  134669
  -9  20  13  149177  121690
  -8  20  13  543716  168250
  -7  20  13   61789   99572
  -6  20  13  702779  129709
  -5  20  13   37770  183444
  -4  20  13   73508   90500
  -3  20  13   25610  138867
  -2  20  13   14895   94846
  -1  20  13   63806   59517
   0  20  13  190707   65392
   1  20  13   24011   68407
   2  20  13  316399   76579
   3  20  13   77465   82554
   4  20  13  240314  118168
   5  20  13   23589  118101
   6  20  13  202779  166540
 -10  21  13  -34616  169658
  -9  21  13   37901  157381
  -8  21  13   93618  121726
  -7  21  13    2517  113367
  -6  21  13   41586  103055
  -5  21  13  113203  105308
  -4  21  13  396414  104822
  -3  21  13  249288  128354
  -2  21  13  336451   82446
  -1  21  13  263936   66777
   0  21  13  347006   70121
   1  21  13   76200   74048
   2  21  13  -52733   91852
   3  21  13   60348  101944
   4  21  13  109255  133085
   5  21  13   18297  144329
   6  21  13   92695  219570
 -10  22  13 -186967  186967
  -9  22  13  -39245  168250
  -8  22  13   -8855  152552
  -7  22  13  385054  161005
  -6  22  13  136301  150842
  -5  22  13  108470  119243
  -4  22  13  -14767  112690
  -3  22  13   71151  142993
  -2  22  13   27334   83490
  -1  22  13  105003   72941
   0  22  13  -33220   77479
   1  22  13  -52328   82645
   2  22  13  224644   95878
   3  22  13  299726  135940
   4  22  13   88711  196225
   5  22  13  -79496  209709
  -9  23  13  -42063  186967
  -8  23  13  110866  182741
  -7  23  13   71153  164225
  -6  23  13  -13283  155369
  -5  23  13  380643  163218
  -4  23  13  -92578  151143
  -3  23  13  584168  104000
  -2  23  13  -23366  141583
  -1  23  13  594707  120082
   0  23  13  -90970   90970
   1  23  13  219784   99359
   2  23  13   33064  129922
   3  23  13   39545  175494
  -8  24  13  140221  201256
  -7  24  13  285372  193206
  -6  24  13  -28577  179922
  -5  24  13  228150  174086
  -4  24  13   -7044  175293
  -3  24  13  -97860  110784
  -2  24  13  -57109  116381
  -1  24  13   30416   99880
   0  24  13    2537  103082
   1  24  13  139671  158992
  -6  25  13   38907  221382
  -5  25  13  119661  177910
  -4  25  13   85939  179721
  -3  25  13  260197  193306
  -2  25  13  259395  175696
  -1  25  13  461681  198236
  -3  26  13 -176703  176703
  -2  26  13   -6038  196426
  -1  26  13 -115319  196627
  -4   0  14  224016   49710
  -2   0  14  489488   56753
   0   0  14 1405772  111394
   2   0  14  776324   68728
   4   0  14  479771   83521
   6   0  14  196634   66911
   8   0  14   77306   93423
  -5   1  14  698158   57961
  -4   1  14 1410445   54000
  -3   1  14  114655   58967
  -2   1  14  450050   40620
  -1   1  14  232601   27514
   0   1  14  720487   35354
   1   1  14  -24358   24358
   2   1  14   14111   28758
   3   1  14   67330   30879
   4   1  14  253872   57558
   5   1  14  -57415   57415
   6   1  14  558028   69803
   7   1  14   93167   54609
   8   1  14  620027   70579
   9   1  14   88385  109345
  -5   2  14   80471   46489
  -4   2  14   65628   64603
  -3   2  14  198634   42566
  -2   2  14  127708   24913
  -1   2  14  234021   28035
   0   2  14  262785   30345
   1   2  14  185973   26775
   2   2  14  688964   34544
   3   2  14  840837   42402
   4   2  14  238068   57759
   5   2  14   71509   60053
   6   2  14  143521   53216
   7   2  14  -60421   60421
   8   2  14   24277   65132
   9   2  14  113666  110010
  -5   3  14 1962852   81105
  -4   3  14  450587   39419
  -3   3  14 1093157   54361
  -2   3  14   87858   24263
  -1   3  14  188810   28182
   0   3  14  -10362   27189
   1   3  14  406506   29588
   2   3  14  109680   30007
   3   3  14    8459   32752
   4   3  14   46112   54032
   5   3  14  728057   68825
   6   3  14   14272   46991
   7   3  14  471916   59364
   8   3  14   81060   65521
   9   3  14  331254  129709
  -5   4  14  516625   55345
  -4   4  14   97334   33223
  -3   4  14  235664   35923
  -2   4  14   25750   25050
  -1   4  14  193265   28925
   0   4  14   16839   33582
   1   4  14  792877   47372
   2   4  14    8590   29169
   3   4  14  517891  143631
   4   4  14  165656   58371
   5   4  14  755877   71497
   6   4  14  -44872   47473
   7   4  14  150967   58904
   8   4  14  -42897   64685
   9   4  14  -44879  162414
  -6   5  14  -30188   46088
  -5   5  14 1680436   57917
  -4   5  14  201425   35711
  -3   5  14  937620   68829
  -2   5  14  624258   34614
  -1   5  14  834375   40467
   0   5  14   10715   29847
   1   5  14  124481   33664
   2   5  14   18636   35205
   3   5  14   48910   31188
   4   5  14   18506   56069
   5   5  14  268102   67417
   6   5  14  228310   52026
   7   5  14  375335   60563
   8   5  14  157536   68015
   9   5  14  404052  118640
  -6   6  14  210518   51923
  -5   6  14  131383   36207
  -4   6  14   73619   35897
  -3   6  14  115548   40151
  -2   6  14  548081   32707
  -1   6  14   53980   28288
   0   6  14  393156   34773
   1   6  14  209789   42854
   2   6  14 1543252   61380
   3   6  14  417318   58839
   4   6  14  589327   69303
   5   6  14  237425   68765
   6   6  14  143781   51489
   7   6  14  -24685   59008
   8   6  14   52813  102927
   9   6  14  114814  120071
  -6   7  14  625504   61182
  -5   7  14  228290   53534
  -4   7  14 1300904   60666
  -3   7  14  164054   38067
  -2   7  14 1443576   47420
  -1   7  14   11538   37866
   0   7  14  143859   33701
   1   7  14    -580   34283
   2   7  14  189198   38998
   3   7  14  122044   85634
   4   7  14  201205   66615
   5   7  14  -10750   54889
   6   7  14  332781   65446
   7   7  14   64452   60740
   8   7  14  682570  111356
   9   7  14  -60038  195922
  -6   8  14  676008   66816
  -5   8  14    8963   51923
  -4   8  14   -2345   37167
  -3   8  14  126901   75772
  -2   8  14  547283   42270
  -1   8  14   56341   58585
   0   8  14  698743   73390
   1   8  14  -45505   45505
   2   8  14 1435951   64153
   3   8  14  176806   59108
   4   8  14  577918   53442
   5   8  14   83793   57164
   6   8  14  384310   67015
   7   8  14  -63969   74176
   8   8  14   19600  128804
   9   8  14    7416  189381
  -6   9  14  679932   72050
  -5   9  14  154811   56955
  -4   9  14 1574428   94992
  -3   9  14  678635   50022
  -2   9  14  629024   37166
  -1   9  14   75016   32645
   0   9  14   27416   41032
   1   9  14   14445   38348
   2   9  14  -46360   46360
   3   9  14   15942   57195
   4   9  14  159132   52603
   5   9  14   71349   58261
   6   9  14  337195   69989
   7   9  14   64345   86854
   8   9  14  259352  115497
   9   9  14  140552  200451
  -6  10  14  418008   68427
  -5  10  14   22531   57157
  -4  10  14   31798   58565
  -3  10  14  -50614   72150
  -2  10  14   53766   43276
  -1  10  14  726929   44239
   0  10  14  300137   50666
   1  10  14  940729   55326
   2  10  14  355495   58765
   3  10  14  431492   53034
   4  10  14  513822   59723
   5  10  14  463702   64485
   6  10  14  206380   86034
   7  10  14  119598   81515
   8  10  14   41820  137356
   9  10  14  102000  210714
  -6  11  14  -34011   62992
  -5  11  14 1739860  104855
  -4  11  14  246317   67220
  -3  11  14 2539591   98916
  -2  11  14   19376   33267
  -1  11  14 1172499   58978
   0  11  14  120570   52327
   1  11  14  154991   42082
   2  11  14    -165   79094
   3  11  14  144322   61033
   4  11  14   16467   57400
   5  11  14  161886   64138
   6  11  14  148519  116567
   7  11  14  330168  106795
   8  11  14   50066  124019
   9  11  14  159955  214538
  -7  12  14  293927   75471
  -6  12  14  -66415   66415
  -5  12  14   32856   62992
  -4  12  14   34981   63596
  -3  12  14   31092   46814
  -2  12  14    9151   34682
  -1  12  14  903708   58234
   0  12  14   82195   42319
   1  12  14  345454   91644
   2  12  14  133443   63178
   3  12  14 1209470   68534
   4  12  14   33273   59413
   5  12  14  367465   70077
   6  12  14    8072   78159
   7  12  14 -123182  183243
   8  12  14   43460  127800
   9  12  14   27058  222387
  -6  13  14  288000   78690
  -5  13  14  310739   77484
  -4  13  14  783289   86942
  -3  13  14 1263286  112905
  -2  13  14  -16060   51953
  -1  13  14 1425029   66479
   0  13  14  317019   46670
   1  13  14  -57203   57203
   2  13  14   29625   52855
   3  13  14   13061  106232
   4  13  14  144872   68477
   5  13  14  441063   74009
   6  13  14   30566   80169
   7  13  14  381513  122193
   8  13  14  289617  121868
 -10  14  14  150809  137256
  -9  14  14  586718  135847
  -7  14  14  152703   82314
  -6  14  14   98980   79696
  -5  14  14   91063   78490
  -4  14  14   39833   74264
  -3  14  14   35334   44069
  -2  14  14  160541   43479
  -1  14  14  431949   49345
   0  14  14  756517   69602
   1  14  14  589650   76678
   2  14  14  553682   60247
   3  14  14  159034   62495
   4  14  14  463896   71151
   5  14  14  257318   77497
   6  14  14  -71545  106131
   7  14  14 -107269  107269
   8  14  14   20585  172538
 -10  15  14   57408  152955
  -9  15  14   30130  134439
  -8  15  14  198397   85734
  -7  15  14  100680   91973
  -6  15  14  675850   98213
  -5  15  14   41075   81105
  -4  15  14  858453  105256
  -3  15  14  125503   82917
  -2  15  14  942054   55078
  -1  15  14    -956   47950
   0  15  14  267758   98213
   1  15  14  110969   55573
   2  15  14   86129   59814
   3  15  14   86534  106707
   4  15  14  -35063   71546
   5  15  14   13820   80446
   6  15  14  473366  269985
   7  15  14 -166628  176561
   8  15  14  294122  133178
 -10  16  14  904800  173884
  -9  16  14  -42857   88288
  -8  16  14  721294  179620
  -7  16  14  -36932   78869
  -6  16  14  191646   96402
  -5  16  14  -85935   85935
  -4  16  14   64429   90967
  -3  16  14   -2818   89358
  -2  16  14  510585   53823
  -1  16  14  -35851   50264
   0  16  14  806995  124075
   1  16  14  -27702   56727
   2  16  14  645983   71086
   3  16  14   10733   70564
   4  16  14  665387   83228
   5  16  14   11231   86011
   6  16  14  276594  125975
   7  16  14   66173  124440
 -12  17  14  238708  230437
 -11  17  14  156613  197030
 -10  17  14    9270  176098
  -9  17  14   64625   96802
  -8  17  14   21728   89439
  -7  17  14  -53283  229835
  -6  17  14  299585   83621
  -5  17  14  280204  110490
  -4  17  14  831992  110490
  -3  17  14  142858  101433
  -2  17  14  690491   76890
  -1  17  14  198348  100650
   0  17  14  343211  156597
   1  17  14   18806   61730
   2  17  14   16286   68964
   3  17  14   98079   77770
   4  17  14   77810   77476
   5  17  14   58239  109309
   6  17  14  157302  133946
   7  17  14  252136  177356
 -11  18  14  304569  225206
 -10  18  14  217408  200653
  -9  18  14  548579  228929
  -8  18  14  118618   95117
  -7  18  14  221023   92871
  -6  18  14   56568   89914
  -5  18  14  315816   90669
  -4  18  14   23712   84865
  -3  18  14   46239  102238
  -2  18  14   30606   54452
  -1  18  14  173296   74619
   0  18  14  407563   66409
   1  18  14  686192   73477
   2  18  14  111471   68907
   3  18  14  247800   82904
   4  18  14  101950   82839
   5  18  14  245472  110561
   6  18  14   72216  125638
   7  18  14 -205483  205483
 -11  19  14  236607  145392
 -10  19  14 -127729  127729
  -9  19  14   62210  314462
  -8  19  14   -6868  106218
  -7  19  14  133933   99778
  -6  19  14   44030   97539
  -5  19  14  636929  174992
  -4  19  14  185863   91533
  -3  19  14  726366  116326
  -2  19  14  -15303   72625
  -1  19  14  607985   63905
   0  19  14  -19677   67392
   1  19  14  122935   68579
   2  19  14  -25030   72922
   3  19  14  117383  141786
   4  19  14  -50660  103700
   5  19  14  177617  139151
   6  19  14 -152351  205885
 -10  20  14 -128603  171068
  -9  20  14  400040  129755
  -8  20  14   10837  142188
  -7  20  14  600593  139068
  -6  20  14   94064  101784
  -5  20  14  -93783  176502
  -4  20  14  -71944   98692
  -3  20  14   -5159  196527
  -2  20  14  -73790   73790
  -1  20  14   -4604   64707
   0  20  14  -51234   69479
   1  20  14  430352   76919
   2  20  14  103157   85520
   3  20  14  336125  107077
   4  20  14  -26538  134941
   5  20  14 -164225  199444
   6  20  14   67363  206689
 -10  21  14  -15497  183143
  -9  21  14  -32604  164225
  -8  21  14 -294958  340828
  -7  21  14  263006  120567
  -6  21  14   81382  117416
  -5  21  14  549058  187972
  -4  21  14  152808  111765
  -3  21  14  250143   83753
  -2  21  14  -25335   86478
  -1  21  14  281698   97767
   0  21  14   27872   75504
   1  21  14  126871   92927
   2  21  14  -54920  119356
   3  21  14   86338  132465
   4  21  14  201369  197030
  -9  22  14  173195  189784
  -8  22  14  194731  174288
  -7  22  14  147588  159193
  -6  22  14   76731  155570
  -5  22  14  153074  149331
  -4  22  14  100442  308928
  -3  22  14   56420  187268
  -2  22  14   58616  120096
  -1  22  14  108098   86665
   0  22  14  267562   92103
   1  22  14  197130  100096
   2  22  14  368394  138061
   3  22  14  155702  174288
  -8  23  14   66298  189582
  -7  23  14   22302  183545
  -6  23  14  302106  179118
  -5  23  14 -162213  162213
  -4  23  14  488652  174690
  -3  23  14   28730  106677
  -2  23  14  527572   96084
  -1  23  14   83879   99230
   0  23  14  224213  103971
   1  23  14  -47295  157181
  -7  24  14  -16502  189582
  -6  24  14  118343  198841
  -5  24  14  -12276  191595
  -4  24  14  144056  186967
  -3  24  14  -12780  198136
  -2  24  14   32326  103571
  -1  24  14   69316  185960
   0  24  14  291455  193005
  -3  25  14  -56955  176703
  -2  25  14  232667  190590
  -1  25  14 -202665  202665
  -2  26  14  154097  214337
  -5   0  15  -19522   49107
  -3   0  15  773025   80100
  -1   0  15 1974927   98213
   1   0  15  346732   83722
   3   0  15  157515   79094
   5   0  15   47973   69140
   7   0  15  101049   92073
   9   0  15  199262  183143
  -5   1  15 1503952   85734
  -4   1  15   91730   40955
  -3   1  15  240035   39054
  -2   1  15   11900   35963
  -1   1  15   25705   27647
   0   1  15   25342   38569
   1   1  15   72904   38820
   2   1  15   47891   31275
   3   1  15  746631   63203
   4   1  15  206690   53071
   5   1  15  592271   52753
   6   1  15  -28169   51977
   7   1  15  444761   65020
   8   1  15  181740  109431
   9   1  15  218457  128294
  -5   2  15   77701   51722
  -4   2  15  207125   38620
  -3   2  15  141699   38485
  -2   2  15  352938   42154
  -1   2  15  687599   39585
   0   2  15 1542533   52707
   1   2  15 1182854   72738
   2   2  15 1170730   50719
   3   2  15  331846   78490
   4   2  15   70985   49689
   5   2  15   68753   46480
   6   2  15   60495   53992
   7   2  15   -7225   63766
   8   2  15   61806  293935
   9   2  15  -67235  127127
  -5   3  15  303807   55546
  -4   3  15 1171170   59888
  -3   3  15  125420   36713
  -2   3  15  295811   29967
  -1   3  15   18813   27742
   0   3  15  115585   32351
   1   3  15  133043   35129
   2   3  15  131274   33863
   3   3  15   61059   55150
   4   3  15  459827   53740
   5   3  15  206827   47714
   6   3  15  441973   56576
   7   3  15   41894   63001
   8   3  15  209833  120048
   9   3  15  -96934  129145
  -6   4  15  184072   51822
  -5   4  15   14188   42566
  -4   4  15  -22475   36357
  -3   4  15   86448   37983
  -2   4  15  385689   32370
  -1   4  15   42107   38905
   0   4  15 1268188   52539
   1   4  15   49798   34697
   2   4  15 1045801   53840
   3   4  15   81896   57827
   4   4  15  299255   45635
   5   4  15   14362   47710
   6   4  15    4672   53015
   7   4  15   58208   64960
   8   4  15   67189  150439
   9   4  15   65225  131392
  -7   5  15  -33207   51320
  -6   5  15 1027089   84326
  -5   5  15  556110   76578
  -4   5  15 1156398   61184
  -3   5  15  509285   46741
  -2   5  15  255171   30857
  -1   5  15   72422   30770
   0   5  15    4004   33980
   1   5  15  -40300   46192
   2   5  15  459397   57677
   3   5  15   24110   57089
   4   5  15  602618   49379
   5   5  15   19109   48652
   6   5  15  432039   57273
   7   5  15  164595   65709
   8   5  15  398280  116046
   9   5  15  154892  134914
  -7   6  15  417539   61182
  -6   6  15   44215   52728
  -5   6  15  -36092   36092
  -4   6  15   31588   49307
  -3   6  15  758377   55135
  -2   6  15  109729   29985
  -1   6  15  195755   32622
   0   6  15  690770   42654
   1   6  15  382029   40375
   2   6  15   -7773   40360
   3   6  15  722110   69009
   4   6  15  110653   71558
   5   6  15   47867   49855
   6   6  15   43915   55801
   7   6  15   25984   75236
   8   6  15  -24222  281658
   9   6  15  113947  137303
  -7   7  15 1111337   88553
  -6   7  15  601614   66011
  -5   7  15 1749086   83722
  -4   7  15   38921   39632
  -3   7  15 1037867   64389
  -2   7  15  187142   30592
  -1   7  15  292889   37198
   0   7  15    5004   35385
   1   7  15  425302   44725
   2   7  15    -385   40004
   3   7  15  266419   58715
   4   7  15  -42176   68045
   5   7  15  238431   82334
   6   7  15   53819   69514
   7   7  15  450576   82184
   8   7  15   78466  169759
   9   7  15 -202882  237684
  -7   8  15  239521   64804
  -6   8  15   37882   58565
  -5   8  15   12636   82011
  -4   8  15  -13005   44376
  -3   8  15  191669   45094
  -2   8  15  -30660   44939
  -1   8  15  484104   40472
   0   8  15  121911   38742
   1   8  15 1792258   69089
   2   8  15   10595   65207
   3   8  15  394213   53516
   4   8  15   63577   68028
   5   8  15   93029   61319
   6   8  15   16914   71222
   7   8  15 -112968  236577
   8   8  15   15451  128200
   9   8  15  455924  148778
  -7   9  15  945066   97207
  -6   9  15  503147   72251
  -5   9  15  928039   79898
  -4   9  15  420668   55446
  -3   9  15  653428   61484
  -2   9  15  120138   33420
  -1   9  15  227476   37876
   0   9  15   -9936   39500
   1   9  15  -15516   40180
   2   9  15  -42120   74866
   3   9  15  280491   56064
   4   9  15   42107   57734
   5   9  15  278739   67178
   6   9  15  -56204   74429
   7   9  15  413972  133231
   8   9  15   -1842  131419
   9   9  15  328779  188577
  -7  10  15  285022   76477
  -6  10  15  -62389   62389
  -5  10  15  -58364   64201
  -4  10  15  123169   51421
  -3  10  15  159802   77885
  -2  10  15  213078   37270
  -1  10  15   46320   38498
   0  10  15  705279   50711
   1  10  15   93859   44563
   2  10  15  951686   76346
   3  10  15  174744   84009
   4  10  15  423520   62647
   5  10  15   82298   70703
   6  10  15   56019   78184
   7  10  15  -66703  110744
   8  10  15   74207  135421
  -7  11  15  102192   72854
  -6  11  15 1014533   89961
  -5  11  15   72251   67220
  -4  11  15  569404   56244
  -3  11  15  185225   51130
  -2  11  15 1454166   61827
  -1  11  15   74460   41116
   0  11  15   39797   43417
   1  11  15   27217  110590
   2  11  15    6320   73597
   3  11  15  106515   56473
   4  11  15  247087   65339
   5  11  15  110186   71270
   6  11  15  330385   83292
   7  11  15   34487  118133
   8  11  15  242232  303192
  -6  12  15  161454   74061
  -5  12  15   74730   73860
  -4  12  15  423041   79496
  -3  12  15   -6075   51765
  -2  12  15 1164115   59203
  -1  12  15    2219   42891
   0  12  15  687602   51203
   1  12  15   16680   62615
   2  12  15  823153   64176
   3  12  15   59729   91122
   4  12  15  564706   71666
   5  12  15    9408   75582
   6  12  15   29946  106967
   7  12  15 -131922  131922
   8  12  15 -199503  271091
  -7  13  15   91332   84125
  -6  13  15  641202   88352
  -5  13  15  357158   81910
  -4  13  15 1049161   98213
  -3  13  15   52645   56780
  -2  13  15  412666   63813
  -1  13  15   73005   45939
   0  13  15   25017   46860
   1  13  15  -30019   68327
   2  13  15   20992   56592
   3  13  15  137913   66992
   4  13  15  370249   74709
   5  13  15  104273  108460
   6  13  15  433847  201055
   7  13  15  166877  179821
   8  13  15  301008  137216
 -10  14  15  214773  148527
  -7  14  15   81308   86740
  -6  14  15  -18716   81105
  -5  14  15  -75270   75270
  -4  14  15   62045   81509
  -3  14  15   63296   57341
  -2  14  15  450537   55292
  -1  14  15  344848   52091
   0  14  15  318595   67342
   1  14  15  331345   80339
   2  14  15  267304   63088
   3  14  15  335819   69811
   4  14  15  274156   77764
   5  14  15   74172  154595
   6  14  15   62523  117584
   7  14  15  137827  144494
  -9  15  15  120389  148326
  -8  15  15  211421  105056
  -7  15  15  582432  108075
  -6  15  15   76486   96201
  -5  15  15  675818  102842
  -4  15  15   25986   87546
  -3  15  15  624444  129306
  -2  15  15   82508   49164
  -1  15  15   99854   50860
   0  15  15   29725  139570
   1  15  15  -15907   58721
   2  15  15  -44654   65065
   3  15  15  337632   89353
   4  15  15   89959  132733
   5  15  15  600673  117036
   6  15  15    1896  128720
   7  15  15  -36226  130963
 -12  16  15  156406  219771
 -11  16  15  418800  199444
 -10  16  15 -179318  179318
  -9  16  15  629581  198942
  -8  16  15  -37480  187771
  -7  16  15   93214  104251
  -6  16  15  181349  102238
  -5  16  15  113218   96603
  -4  16  15  -55144   92778
  -3  16  15  138505   67311
  -2  16  15  -27545   52217
  -1  16  15  754608   68533
   0  16  15   47352   77507
   1  16  15  929440  116254
   2  16  15   -8681   69678
   3  16  15  534015   82800
   4  16  15   58668   85646
   5  16  15  152157  119404
   6  16  15  100538  122558
   7  16  15    7278  210112
 -12  17  15   18246  249155
 -11  17  15  123250  211721
 -10  17  15  293214  203670
  -9  17  15  273489  105868
  -8  17  15  125198   98897
  -7  17  15  497300   93357
  -6  17  15  -16100  109081
  -5  17  15  487970  115520
  -4  17  15   -9258   96201
  -3  17  15  402336   77730
  -2  17  15  196790   57297
  -1  17  15   57235  153558
   0  17  15  -28813   73345
   1  17  15    5193   68123
   2  17  15   12748   85176
   3  17  15   72988   83859
   4  17  15  -53571  165030
   5  17  15  116628  149840
   6  17  15  133382  145407
 -11  18  15   81598  235871
 -10  18  15  305193  123388
  -9  18  15  430452  118998
  -8  18  15  247110  120955
  -7  18  15    -409  189181
  -6  18  15  174378  104351
  -5  18  15    9109   90857
  -4  18  15   80296  111294
  -3  18  15   12730  115923
  -2  18  15  171980   80921
  -1  18  15  194305   70254
   0  18  15  369296   71525
   1  18  15  224989   73696
   2  18  15  202458   80225
   3  18  15  158956   84598
   4  18  15  212502  157181
   5  18  15 -136820  136820
   6  18  15   82793  206086
 -10  19  15   62452  136482
  -9  19  15   -6544  288198
  -8  19  15  260114  183645
  -7  19  15   70136  109541
  -6  19  15  604997  141683
  -5  19  15  141403  102365
  -4  19  15  544337  102955
  -3  19  15   67679   97778
  -2  19  15  158489   77375
  -1  19  15   41363   73928
   0  19  15   36515   70590
   1  19  15  122455   76289
   2  19  15  -49445   82633
   3  19  15  -91934  122468
   4  19  15  149420  138160
   5  19  15  211892  201055
 -10  20  15  252216  186967
  -9  20  15  185780  168048
  -8  20  15  -25814  124271
  -7  20  15 -134183  188175
  -6  20  15  180379  115344
  -5  20  15   31052  110055
  -4  20  15    2362  107694
  -3  20  15   -6113  112214
  -2  20  15  266783   71807
  -1  20  15  -10394   72510
   0  20  15  761004   80775
   1  20  15   28537   85952
   2  20  15  483833  103470
   3  20  15   30288  131090
   4  20  15  109123  184955
  -9  21  15  179854  183545
  -8  21  15  156743  159595
  -7  21  15   56164  156175
  -6  21  15  615534  132114
  -5  21  15   82163  116806
  -4  21  15  241404  118706
  -3  21  15  101506  115395
  -2  21  15  263547   78721
  -1  21  15  -11890  104261
   0  21  15  -90060   90060
   1  21  15   59702  101194
   2  21  15  234746  128957
   3  21  15   73127  224401
  -9  22  15  104676  202866
  -8  22  15   59120  190186
  -7  22  15 -151746  167043
  -6  22  15   68043  166640
  -5  22  15  166047  162213
  -4  22  15 -110086  149331
  -3  22  15   50484  159595
  -2  22  15   74807   91229
  -1  22  15   81948   94560
   0  22  15  137078  110435
   1  22  15  227160  126567
  -8  23  15  -24552  207695
  -7  23  15  268339  201658
  -6  23  15  111398  185759
  -5  23  15  379314  193206
  -4  23  15   34229  178716
  -3  23  15  227947  176301
  -2  23  15   57675  128075
  -1  23  15   94952  129169
   0  23  15   48040  194414
  -3  24  15   70398  165231
  -2  24  15   -4427  184351
  -1  24  15  -82715  204879
  -2  25  15 -201859  201859
  -1  25  15   84866  213734
  -4   0  16  710454   72452
  -2   0  16 3472878  117734
   0   0  16 3546933   82721
   2   0  16  768195   89358
   4   0  16   37358   87948
   6   0  16  -70384   82686
   8   0  16  352193  178313
  -5   1  16   99194   71646
  -4   1  16  362693   48502
  -3   1  16   83596   68025
  -2   1  16   70501   48000
  -1   1  16  246180   33972
   0   1  16  106233   30217
   1   1  16   74797   35585
   2   1  16  541366  169018
   3   1  16   20536   40729
   4   1  16  757522   52152
   5   1  16  251282   52166
   6   1  16  212696   61641
   7   1  16   30504   71216
   8   1  16  355477  126868
   9   1  16 -108233  140689
  -5   2  16  243164   41695
  -4   2  16  173820   41047
  -3   2  16 1158504   66590
  -2   2  16 2937549   81371
  -1   2  16  840409   45789
   0   2  16  540587   42361
   1   2  16 1062873   50067
   2   2  16  102853   43020
   3   2  16  159901   42380
   4   2  16  163435   46494
   5   2  16   61104   71023
   6   2  16  -13485   59696
   7   2  16   87236  128200
   8   2  16   16860  121603
   9   2  16  289048  148193
  -6   3  16   37793   57961
  -5   3  16 1504079   65603
  -4   3  16  263220   43501
  -3   3  16  685708   90967
  -2   3  16   30129   29292
  -1   3  16   36426   33157
   0   3  16  156040   37773
   1   3  16  207404   50508
   2   3  16  117766   47592
   3   3  16  662625   63588
   4   3  16  240507   47563
   5   3  16  711912   70486
   6   3  16  242868   94438
   7   3  16  299456  104451
   8   3  16   18082  134942
   9   3  16  145153  173583
  -7   4  16   81184   57157
  -6   4  16    7788   49307
  -5   4  16  285639   50113
  -4   4  16    3758   41735
  -3   4  16 1408841   69703
  -2   4  16   90472   30795
  -1   4  16 2015215   60433
   0   4  16   84494   37507
   1   4  16  395561   44108
   2   4  16   44744   57257
   3   4  16  285316   43789
   4   4  16   50677   47111
   5   4  16    1605   51270
   6   4  16  -61654   61654
   7   4  16  275410  117935
   8   4  16   84130  302990
   9   4  16  -67827  145169
  -7   5  16 1118380   89759
  -6   5  16  564418   48944
  -5   5  16 1526687   66653
  -4   5  16   28639   40767
  -3   5  16 1327886   93784
  -2   5  16  337809   48923
  -1   5  16   55510   50226
   0   5  16   36873   39267
   1   5  16  177329   42510
   2   5  16  354601   61182
   3   5  16  492524   55613
   4   5  16   -6343   47217
   5   5  16  582404   57682
   6   5  16   -8084   63815
   7   5  16  304989  107665
   8   5  16   58605  285683
   9   5  16   51565  150066
  -8   6  16  158005   62791
  -7   6  16  -37635   57760
  -6   6  16  -19022   41089
  -5   6  16  277890   44952
  -4   6  16  651304   54942
  -3   6  16  746281   55255
  -2   6  16  266805   35023
  -1   6  16 1568525   64054
   0   6  16 1096833  120200
   1   6  16  375484   52669
   2   6  16  221618   61754
   3   6  16   55579   53765
   4   6  16   38974   57919
   5   6  16   52038   66359
   6   6  16  -53517   64246
   7   6  16  108269  266061
   8   6  16  178318  190388
   9   6  16 -153356  153356
  -7   7  16    5399   61584
  -6   7  16  775417   65176
  -5   7  16  113838   43901
  -4   7  16 1323616   71151
  -3   7  16   47598   44742
  -2   7  16  251737   67320
  -1   7  16  -16494   47482
   0   7  16   41790   41655
   1   7  16   52990   42116
   2   7  16  302614   63678
   3   7  16   25639   63964
   4   7  16  261195   60285
   5   7  16  123583   68839
   6   7  16  712683   84173
   7   7  16 -113528  113528
   8   7  16  264433  161809
  -7   8  16   39262   64402
  -6   8  16   96752   90263
  -5   8  16   35237   44817
  -4   8  16  691993   55202
  -3   8  16  143643   48714
  -2   8  16  474953   40382
  -1   8  16    3509   37822
   0   8  16 1414100  151877
   1   8  16  -42708   42708
   2   8  16  332936   58698
   3   8  16  -22425   54083
   4   8  16  -67127   67127
   5   8  16  -70690   70690
   6   8  16  103686   80259
   7   8  16   12621  116175
   8   8  16  362022  165532
  -7   9  16  381898   74061
  -6   9  16  823136   82715
  -5   9  16  103800  118238
  -4   9  16  635858   83017
  -3   9  16  284927   51908
  -2   9  16  321108   39335
  -1   9  16  -36627   39955
   0   9  16    6583   46217
   1   9  16   59983   59122
   2   9  16  339018   57308
   3   9  16  137317   58740
   4   9  16  220178   65286
   5   9  16  138488   73515
   6   9  16  362230   93760
   7   9  16  181352  155469
   8   9  16  173067  145471
  -7  10  16  -61584   73055
  -6  10  16    7117   67621
  -5  10  16  256859  133331
  -4  10  16 1132459   79178
  -3  10  16  258342   52180
  -2  10  16  450295   46413
  -1  10  16  473247  109686
   0  10  16   41433   46455
   1  10  16  613319   72451
   2  10  16  203635   54122
   3  10  16  159314   60754
   4  10  16  -61383   69636
   5  10  16  110079   77355
   6  10  16   67888  109168
   7  10  16   77167  127153
   8  10  16   56675  192602
  -7  11  16  862378   93182
  -6  11  16  143127   74465
  -5  11  16  452264   57759
  -4  11  16  225128   56334
  -3  11  16  429462   59838
  -2  11  16   35841   40727
  -1  11  16  205225   46747
   0  11  16  -46116   46116
   1  11  16  127144   67182
   2  11  16   94671   57059
   3  11  16  158279   64896
   4  11  16  121870   71930
   5  11  16  474987   84288
   6  11  16  161253  115078
   7  11  16  415083  233860
   8  11  16  236401  162575
  -7  12  16   69239   81910
  -6  12  16  -76678   76678
  -5  12  16  381554   83722
  -4  12  16   44959   56777
  -3  12  16  981796   71134
  -2  12  16    9886   63401
  -1  12  16  729517   55391
   0  12  16   -5388   52845
   1  12  16  832394   63144
   2  12  16   69351   62189
   3  12  16  251393   98053
   4  12  16   -8683   73644
   5  12  16  -22402  155795
   6  12  16  -54611  119928
   7  12  16 -112247  139065
  -8  13  16  106547   96603
  -7  13  16  357906   95998
  -6  13  16  -20327   79696
  -5  13  16  593724   97810
  -4  13  16   60534   57636
  -3  13  16  530310   65165
  -2  13  16   50096   46173
  -1  13  16   38338   50189
   0  13  16  133561   69670
   1  13  16   27940   73334
   2  13  16   53216   63590
   3  13  16  620270   93545
   4  13  16  216650   80839
   5  13  16  453306  114284
   6  13  16 -117695  126372
   7  13  16  236872  234463
 -10  14  16  322020  164023
  -8  14  16  -42464   99621
  -7  14  16   -6843   91571
  -6  14  16   48150   93182
  -5  14  16  158186   95194
  -4  14  16  287693   64713
  -3  14  16  147559   64503
  -2  14  16  477810   54053
  -1  14  16  435570  109320
   0  14  16  214201   73196
   1  14  16  115589   62257
   2  14  16  113523   67252
   3  14  16  -63190   72288
   4  14  16  -51111   82753
   5  14  16   78033  116278
   6  14  16   35361  138859
   7  14  16  146846  211922
 -10  15  16  402216  184351
  -9  15  16  -93895   93895
  -8  15  16  473122  119545
  -7  15  16  154309  102439
  -6  15  16  852723  116729
  -5  15  16  191736  102439
  -4  15  16  562912   92477
  -3  15  16   58764   90565
  -2  15  16   52126   52641
  -1  15  16  -70063   70063
   0  15  16   39283   60904
   1  15  16   44867   64634
   2  15  16  360948  101727
   3  15  16   13225   82141
   4  15  16  579618  113417
   5  15  16     843  128856
   6  15  16  348691  141397
 -11  16  16   51189  212929
 -10  16  16  404359  197231
  -9  16  16   39055  181733
  -8  16  16  139369  117533
  -7  16  16   14560  118741
  -6  16  16  104813  109281
  -5  16  16   52723  106465
  -4  16  16  212728  103847
  -3  16  16   78257   83421
  -2  16  16  660129  105543
  -1  16  16   29063   79303
   0  16  16  545718   97603
   1  16  16   33246   68603
   2  16  16  259539   79102
   3  16  16  -85871   85871
   4  16  16   77161  122968
   5  16  16   82880  205583
   6  16  16   34179  206488
 -11  17  16   33482  234664
 -10  17  16  210975  214137
  -9  17  16  309655  238488
  -8  17  16  592263  237583
  -7  17  16  191021  121357
  -6  17  16  380207  124175
  -5  17  16  132243  118339
  -4  17  16  336193  124376
  -3  17  16  -39577   76253
  -2  17  16   51744   61072
  -1  17  16   16166   64095
   0  17  16  -58100  157143
   1  17  16  -73828   73828
   2  17  16   70990   83991
   3  17  16   46409   92466
   4  17  16  187885  133015
   5  17  16   77790  198236
 -10  18  16  189170  139276
  -9  18  16   44980  196023
  -8  18  16 -114273  114273
  -7  18  16   78838  300677
  -6  18  16  -67769  101980
  -5  18  16   19416  121156
  -4  18  16   14885  123369
  -3  18  16  190852   86433
  -2  18  16  190442   94389
  -1  18  16  673872   98730
   0  18  16  195025  103293
   1  18  16  233964  186993
   2  18  16   48519   92154
   3  18  16   55854  129944
   4  18  16 -105609  156276
 -10  19  16   95870  180123
  -9  19  16  170370  270991
  -8  19  16   69622  198338
  -7  19  16  393833  127193
  -6  19  16  177793  160401
  -5  19  16  541272  150640
  -4  19  16  121903  111825
  -3  19  16  170231   92788
  -2  19  16   34418   82453
  -1  19  16   24973   76778
   0  19  16   14426   85015
   1  19  16  -90597  157386
   2  19  16   50104   98372
   3  19  16  156713  125771
 -10  20  16 -195419  195419
  -9  20  16 -143293  178514
  -8  20  16  112221  158992
  -7  20  16   45256  185256
  -6  20  16  -84007  206790
  -5  20  16  -38986  190992
  -4  20  16  -30670  118760
  -3  20  16  367357  130434
  -2  20  16   20987  117531
  -1  20  16  617416   88266
   0  20  16   64288   91135
   1  20  16  134489  103933
   2  20  16 -115684  205080
  -9  21  16 -102036  200250
  -8  21  16  212981  186363
  -7  21  16  495862  165030
  -6  21  16 -151545  162414
  -5  21  16  367662  159998
  -4  21  16 -131621  160200
  -3  21  16  206243  114625
  -2  21  16 -118115  118115
  -1  21  16   52872   95734
   0  21  16   29228   99269
   1  21  16  172766  124413
  -8  22  16   93277  202866
  -7  22  16   96302  194414
  -6  22  16 -177910  177910
  -5  22  16   22136  174690
  -4  22  16   -8251  180929
  -3  22  16 -123506  123506
  -2  22  16  343777  100008
  -1  22  16   87939  111543
   0  22  16  296511  198236
  -7  23  16   53621  225206
  -6  23  16  165776  196426
  -5  23  16  103361  192401
  -4  23  16  218119  194615
  -2  23  16 -170867  170867
  -1  23  16  100015  198439
  -2  24  16  205731  192200
  -1  24  16  252313  207494
  -5   0  17  595321   70440
  -3   0  17 1049957   83521
  -1   0  17  963816  106061
   3   0  17   86708  101030
   5   0  17   56280   80538
   7   0  17  230881  166238
  -6   1  17   47915   62389
  -5   1  17  758478   53734
  -4   1  17  -15366   43108
  -3   1  17   42421   43682
  -2   1  17   19601   48022
  -1   1  17  130735   47955
   0   1  17  286384   43088
   1   1  17  673133   63384
   2   1  17   94952   61407
   3   1  17  847302   68409
   4   1  17  174381   50526
   5   1  17  717349   97326
   6   1  17  115078   67951
   7   1  17   81209  129206
   8   1  17  301564  200351
  -6   2  17  336576   70036
  -5   2  17   81868   44602
  -4   2  17  309709  134540
  -3   2  17  623800   53715
  -2   2  17  255448   52221
  -1   2  17  888094  100434
   0   2  17 1377901   64290
   1   2  17   32564   81065
   2   2  17  239670   62323
   3   2  17   54496   46507
   4   2  17   76869   52636
   5   2  17    4729   79079
   6   2  17  129263   67928
   7   2  17  191741  115878
   8   2  17  -14502  137176
  -7   3  17  285743   69835
  -6   3  17 1106336   68946
  -5   3  17   41251  101130
  -4   3  17   40721   45657
  -3   3  17   20136   53734
  -2   3  17  136915   50375
  -1   3  17   90990   36816
   0   3  17  171668   42088
   1   3  17   14095   41545
   2   3  17 1345342  189181
   3   3  17  249341   47020
   4   3  17  592846   57341
   5   3  17   92448   59423
   6   3  17  316602   69682
   7   3  17  160464  118807
   8   3  17 -117884  140306
  -7   4  17   22550   60578
  -6   4  17  443963   50117
  -5   4  17   51951   45316
  -4   4  17 1150737   71947
  -3   4  17   48717   51421
  -2   4  17 1634476   81400
  -1   4  17   36216   37014
   0   4  17  570260   47870
   1   4  17  -10188   43492
   2   4  17  258422   55009
   3   4  17  -25177   54503
   4   4  17   63430   55192
   5   4  17    7534   84909
   6   4  17  188870   69272
   7   4  17   94493  118970
   8   4  17  -27614  150136
  -8   5  17 1403158  106465
  -7   5  17   81694   63998
  -6   5  17  902816   60832
  -5   5  17  272466   48736
  -4   5  17  404696   51335
  -3   5  17  -47597   47597
  -2   5  17   -8654   48385
  -1   5  17  123358   39967
   0   5  17  952831   50876
   1   5  17   99516   45776
   2   5  17  647759   90820
   3   5  17  -13033   56480
   4   5  17  758285   71123
   5   5  17   57340   60351
   6   5  17  285591   85127
   7   5  17   90773  189985
   8   5  17 -129270  459668
  -8   6  17  -26364   65810
  -7   6  17   34685   46060
  -6   6  17  138144   48448
  -5   6  17  430541   50348
  -4   6  17  567214   54575
  -3   6  17  162225   50377
  -2   6  17  904075   49072
  -1   6  17  124867   41564
   0   6  17  732216   51370
   1   6  17  131311   63011
   2   6  17  267788   54240
   3   6  17   41014   57978
   4   6  17   10800   78504
   5   6  17   77852   74519
   6   6  17  114701  155671
   7   6  17  158027  123488
   8   6  17  194175  244828
  -8   7  17  112529   70640
  -7   7  17  615283   76477
  -6   7  17  426917   53309
  -5   7  17  856494   65367
  -4   7  17  -20446   47595
  -3   7  17  281793   53983
  -2   7  17   44364   53396
  -1   7  17  294058   42238
   0   7  17   35800   44073
   1   7  17  644808   95797
   2   7  17   45726   59096
   3   7  17  482969   64175
   4   7  17   62203   67591
   5   7  17  474645  100744
   6   7  17   52103  108856
   7   7  17   57616  128731
   8   7  17   14299  154821
  -8   8  17  204496   77684
  -7   8  17   28825   73860
  -6   8  17   43866   48261
  -5   8  17  794275   60339
  -4   8  17   20063   80402
  -3   8  17  854090   63027
  -2   8  17   45447   39932
  -1   8  17  750466   49835
   0   8  17  -11105   43654
   1   8  17  510295   67609
   2   8  17   17757   54402
   3   8  17   30341   64396
   4   8  17   25531   71982
   5   8  17   88280   80103
   6   8  17  -43957  110988
   7   8  17  295570  135040
   8   8  17   33422  182035
  -8   9  17  412058   80703
  -7   9  17  635300   90766
  -6   9  17  105705   53263
  -5   9  17  457253   71847
  -4   9  17  -30817   51871
  -3   9  17   66824  101130
  -2   9  17   28511   68867
  -1   9  17  -44420   44420
   0   9  17  199214  109653
   1   9  17  499815   73515
   2   9  17  158531   57669
   3   9  17  705916   75003
   4   9  17   26873   71015
   5   9  17  233692   84671
   6   9  17  122685  152351
   7   9  17  190602  143343
  -8  10  17  -27975   80503
  -7  10  17   42342   78490
  -6  10  17  161125   58203
  -5  10  17  234637  116125
  -4  10  17   29781   57046
  -3  10  17  609922   80503
  -2  10  17  973998   59025
  -1  10  17  190599   48505
   0  10  17  173902   52423
   1  10  17  517469   59186
   2  10  17  199634   61503
   3  10  17  -18866   66889
   4  10  17  -11930   86369
   5  10  17  167041   87890
   6  10  17  251811  124981
   7  10  17  -29088  193206
  -8  11  17  680324  107068
  -7  11  17  168243   87546
  -6  11  17  251827   61317
  -5  11  17   85245   58700
  -4  11  17  108514   99721
  -3  11  17  -10270   60261
  -2  11  17  144603   46795
  -1  11  17    4704   48676
   0  11  17  665700  110188
   1  11  17  144102   58275
   2  11  17  693064  136032
   3  11  17   65650   69934
   4  11  17  584472   83842
   5  11  17   27569  260123
   6  11  17  321980  137102
   7  11  17   19902  221885
  -8  12  17   48187   94389
  -7  12  17   98966   91370
  -6  12  17   87805   85935
  -5  12  17  -26795   60473
  -4  12  17  735874   72265
  -3  12  17  -37716   63146
  -2  12  17  639766   55054
  -1  12  17   -7984   51492
   0  12  17  209443   70442
   1  12  17   34205   59346
   2  12  17  145479   68446
   3  12  17   14952   72677
   4  12  17  -75632  131504
   5  12  17    5001  114891
   6  12  17   97271  142200
   7  12  17   18784  219167
  -8  13  17  457299  109482
  -7  13  17  240431  100828
  -6  13  17  627147  109684
  -5  13  17   75402   66057
  -4  13  17  352443   84829
  -3  13  17   79025  125181
  -2  13  17   48139  132427
  -1  13  17  -53761   53761
   0  13  17  322155   63853
   1  13  17  -38292   62276
   2  13  17  396175   73846
   3  13  17   44205  121544
   4  13  17  784597   93453
   5  13  17   82958  129752
   6  13  17   75040  145975
  -8  14  17  112981  112100
  -7  14  17   99935  103847
  -6  14  17  118570  103243
  -5  14  17  269367   71907
  -4  14  17  353276   74496
  -3  14  17  540070  103646
  -2  14  17  361251   71676
  -1  14  17  408450   77971
   0  14  17  200025   63859
   1  14  17   37229   68379
   2  14  17   90640   76490
   3  14  17   40414  128294
   4  14  17 -156175  156175
   5  14  17   38944  133916
   6  14  17  125607  200653
 -10  15  17  210166  200250
  -9  15  17  670624  138464
  -8  15  17 -120553  120553
  -7  15  17  899683  125382
  -6  15  17   92661  109885
  -5  15  17  250890   75845
  -4  15  17  -44530  153658
  -3  15  17   11470   74986
  -2  15  17   32681   60177
  -1  15  17  -20966   81915
   0  15  17  -66478   66478
   1  15  17  279435   75303
   2  15  17   59553   80861
   3  15  17  593308  123367
   4  15  17  -27498  248148
   5  15  17  191471  143848
 -11  16  17  311745  243720
 -10  16  17  -29182  205885
  -9  16  17  -57727  110614
  -8  16  17  -47094  131018
  -7  16  17   67443  125382
  -6  16  17 -112502  112502
  -5  16  17  295854  116326
  -4  16  17   47822   76701
  -3  16  17  357705   85091
  -2  16  17   96791   76839
  -1  16  17  428870   70141
   0  16  17   15016   73746
   1  16  17  225576   79290
   2  16  17   52180   88009
   3  16  17  -76554  118628
   4  16  17  -14730  133259
 -11  17  17   89919  255796
 -10  17  17  378589  137841
  -9  17  17  441785  126750
  -8  17  17  248474  171771
  -7  17  17  510795  137658
  -6  17  17  325570  133231
  -5  17  17  255935  127193
  -4  17  17   44343   87146
  -3  17  17  -83860   83860
  -2  17  17   27415   90217
  -1  17  17   39204   76854
   0  17  17  -37894   80344
   1  17  17  237586   86817
   2  17  17  -94823   94823
   3  17  17  187511  135008
   4  17  17   45093  197231
 -10  18  17   52335  149486
  -9  18  17  192159  136383
  -8  18  17   47757  125244
  -7  18  17  -22024  115733
  -6  18  17  -74465  136653
  -5  18  17   44931  138464
  -4  18  17  311791   90765
  -3  18  17  290172   95084
  -2  18  17  450104   87609
  -1  18  17  264031   86866
   0  18  17  211111   93572
   1  18  17   92909   92565
   2  18  17   16903   98740
   3  18  17   69126  180123
 -10  19  17  236677  202464
  -9  19  17  207489  178917
  -8  19  17  799816  181935
  -7  19  17   30679  126975
  -6  19  17  575906  126956
  -5  19  17   40424  118389
  -4  19  17  183802  151646
  -3  19  17  -39325  138364
  -2  19  17  -11643   79571
  -1  19  17   16238   85540
   0  19  17  138029  122535
   1  19  17   53597  102188
   2  19  17  182726  243117
  -9  20  17  -85130  188175
  -8  20  17  177855  178917
  -7  20  17 -156779  165231
  -6  20  17   -5434  161608
  -5  20  17 -151746  151746
  -4  20  17  340456  221885
  -3  20  17 -213632  222588
  -2  20  17  409716   92442
  -1  20  17  -22214   94486
   0  20  17  347632  123906
   1  20  17   66358  197431
  -8  21  17  559049  205684
  -7  21  17  -75873  181131
  -6  21  17  603327  189181
  -5  21  17   93102  179922
  -4  21  17  101350  125246
  -3  21  17  -78564  109161
  -2  21  17   15563   93364
  -1  21  17    7832  125938
   0  21  17 -186565  186565
  -7  22  17 -133834  202263
  -6  22  17  140607  197030
  -5  22  17  -89358  189784
  -4  22  17  101433  190388
  -2  22  17  105256  168653
  -1  22  17  214378  190992
  -2  23  17 -176502  176502
  -1  23  17  -39245  209508
  -6   0  18  588070   79898
  -4   0  18  403887   73055
  -2   0  18  900600   94590
   0   0  18  779213   62115
   2   0  18   46843   63230
   4   0  18  195345  150741
   6   0  18  327556  158389
   8   0  18  332783  231041
  -6   1  18  198644   49385
  -5   1  18   -9148   47851
  -4   1  18  -13966   53835
  -3   1  18  -65105   65105
  -2   1  18   13493   99822
  -1   1  18   21237   94289
   0   1  18  384431   53373
   1   1  18   74511   60691
   2   1  18  957211   52864
   3   1  18  113552   51561
   4   1  18  563912   63946
   5   1  18   20784   65833
   6   1  18  237130  113284
   7   1  18   58290  136616
   8   1  18   72163  239595
  -7   2  18  393239   74866
  -6   2  18   95854   88653
  -5   2  18  337887   53436
  -4   2  18   45029   48501
  -3   2  18  450650   56051
  -2   2  18  608836   61328
  -1   2  18  562552   46797
   0   2  18   40872   82507
   1   2  18  -10386   59339
   2   2  18   34263   50660
   3   2  18   81487   60973
   4   2  18   50471   65417
   5   2  18   93013   67186
   6   2  18  257900  186967
   7   2  18  266278  183847
   8   2  18  185496  364273
  -8   3  18  139115   70640
  -7   3  18  632083   86138
  -6   3  18   63871   48136
  -5   3  18   71733   49702
  -4   3  18  -36854   49080
  -3   3  18   16619   52002
  -2   3  18    -555  100728
  -1   3  18  413337   44966
   0   3  18   -3650   43194
   1   3  18  551622   70869
   2   3  18   41326  108563
   3   3  18  792980   58303
   4   3  18  -21067  100625
   5   3  18  257060   78170
   6   3  18   95992  114867
   7   3  18   98969  299670
   8   3  18 -209545  306412
  -8   4  18   55619   69232
  -7   4  18 1025529   69089
  -6   4  18  -10466   50864
  -5   4  18  662775   89559
  -4   4  18   -3706   50436
  -3   4  18 1283867   82089
  -2   4  18  -15313   39492
  -1   4  18  603080   81669
   0   4  18  -39388   44042
   1   4  18   32719   62259
   2   4  18   29639   96014
   3   4  18   35657   63772
   4   4  18   23047   68879
   5   4  18  189905   67167
   6   4  18   25477  115009
   7   4  18  317964  143294
  -8   5  18  161632   73860
  -7   5  18  527822   58522
  -6   5  18   55684   49417
  -5   5  18  268941   83822
  -4   5  18   -3111   50707
  -3   5  18   20358   53066
  -2   5  18  193616   42936
  -1   5  18  163456   52597
   0   5  18  148343   45998
   1   5  18  722968  112100
   2   5  18   64359   57519
   3   5  18  253252   67895
   4   5  18   35427   71459
   5   5  18  407245   87434
   6   5  18 -155960  224703
   7   5  18   27100  143016
  -8   6  18  171993   79898
  -7   6  18  103195   53396
  -6   6  18  535020   58464
  -5   6  18  342868  107168
  -4   6  18  640783   64808
  -3   6  18  530916   62491
  -2   6  18  115257   59627
  -1   6  18  634464   51079
   0   6  18  374095   70001
   1   6  18  262743   61160
   2   6  18   18992   58653
   3   6  18   42613   66003
   4   6  18  109232  129434
   5   6  18  175542   81959
   6   6  18   86033  121381
   7   6  18  260243  252778
  -9   7  18  331066   86339
  -8   7  18  391397   87948
  -7   7  18  303991   60678
  -6   7  18  241790   57722
  -5   7  18    6977   53945
  -4   7  18  207948   57058
  -3   7  18   43504   56277
  -2   7  18  124785   62753
  -1   7  18   22766   52754
   0   7  18  871095   79064
   1   7  18   85783   89041
   2   7  18  249781   61215
   3   7  18  151058   68564
   4   7  18  249520   77416
   5   7  18  -14321  107822
   6   7  18 -102736  125505
   7   7  18   13644  149196
  -9   8  18   10176   90967
  -8   8  18   31700   59969
  -7   8  18  196262   62690
  -6   8  18  479259   62685
  -5   8  18  -54744   54744
  -4   8  18 1297845   82182
  -3   8  18   85927   61670
  -2   8  18  932787   76203
  -1   8  18   45757   48722
   0   8  18  580608   73570
   1   8  18   38575   84351
   2   8  18   65310   65755
   3   8  18   47538   69915
   4   8  18  136765  106993
   5   8  18  -33098  110277
   6   8  18  318069  133656
   7   8  18   96189  154477
  -9   9  18  218399   93182
  -8   9  18  334664   65317
  -7   9  18   44857   59834
  -6   9  18  300316   87747
  -5   9  18   18716   58748
  -4   9  18   64921   62055
  -3   9  18   92937   60403
  -2   9  18  146706   47272
  -1   9  18  457843   78728
   0   9  18  468528   75973
   1   9  18  146522   60247
   2   9  18  669520   69845
   3   9  18  121248   73048
   4   9  18  -35302   82910
   5   9  18   33269  130011
   6   9  18  218053  318789
   7   9  18  211313  204275
  -9  10  18   10383   99621
  -8  10  18   41525   88553
  -7  10  18   84232   63396
  -6  10  18  140317   61220
  -5  10  18  468476   69301
  -4  10  18  629372   69589
  -3  10  18  400682   67934
  -2  10  18  314779   73860
  -1  10  18  221650  108331
   0  10  18  313106   78045
   1  10  18  -32558   95879
   2  10  18  -21453   65433
   3  10  18   13691   85646
   4  10  18   68937   84585
   5  10  18  233928  238287
   6  10  18   73774  142494
  -8  11  18  -47698   95596
  -7  11  18  319523  176098
  -6  11  18   67329   68188
  -5  11  18   75817   65534
  -4  11  18   61042   66315
  -3  11  18  -25619   66057
  -2  11  18   21753   51000
  -1  11  18  712912   83169
   0  11  18   64895   58289
   1  11  18  457166   87839
   2  11  18   58994   70741
   3  11  18  559883   82983
   4  11  18   46462   93589
   5  11  18  120204  131182
   6  11  18  167772  205080
  -8  12  18   79672  106061
  -7  12  18  177795  100828
  -6  12  18   16088   68428
  -5  12  18  622080   75202
  -4  12  18   14463   66923
  -3  12  18  998433   80659
  -2  12  18   -6748   66435
  -1  12  18  278884   76059
   0  12  18  -61473   61473
   1  12  18  -32636   66078
   2  12  18  -74247   74247
   3  12  18   82470   86346
   4  12  18   32666  118241
   5  12  18  419522  138513
  -8  13  18  107189  111696
  -7  13  18  226358  111294
  -6  13  18   17191   71286
  -5  13  18  100851  122666
  -4  13  18   22910   82113
  -3  13  18   90061   71560
  -2  13  18   35755   60259
  -1  13  18  209391   82290
   0  13  18  161982   66834
   1  13  18  538777   93857
   2  13  18  -55717  103072
   3  13  18  674872  158168
   4  13  18  130801  130907
   5  13  18  221980  188577
 -11  14  18  121983  223192
  -8  14  18  163518  121558
  -7  14  18  210481  121156
  -6  14  18   80822   76577
  -5  14  18  143139  118741
  -4  14  18  653754   98615
  -3  14  18  358051   80471
  -2  14  18  378710   83222
  -1  14  18   37860   68196
   0  14  18   86309   69158
   1  14  18   76206   85405
   2  14  18  -35998   85128
   3  14  18  -79592   95071
   4  14  18  -11976  131250
 -11  15  18   88212  240703
 -10  15  18  631674  220979
  -9  15  18   30936  145507
  -8  15  18  505115  135847
  -7  15  18    2738  119545
  -6  15  18  157622   82678
  -5  15  18   34033   80033
  -4  15  18  -15138   80333
  -3  15  18   58259   85803
  -2  15  18   -8691   85091
  -1  15  18  120404   82567
   0  15  18  129551   76890
   1  15  18  138568   85253
   2  15  18  368115   95934
   3  15  18    9858  130085
   4  15  18  155830  177708
 -11  16  18  241038  260022
 -10  16  18  114773  135986
  -9  16  18  -94791  151344
  -8  16  18  130510  139872
  -7  16  18 -100226  133633
  -6  16  18  315619  131621
  -5  16  18   25622   84867
  -4  16  18  553920   91646
  -3  16  18  -88209   88209
  -2  16  18  765235  111495
  -1  16  18   18262  127189
   0  16  18  148820   81950
   1  16  18   40776   90127
   2  16  18   93871  166259
   3  16  18  134897  183143
 -10  17  18  187908  146808
  -9  17  18  152283  208602
  -8  17  18  -34011  153156
  -7  17  18  254109  147922
  -6  17  18  301464  148930
  -5  17  18  122377  139671
  -4  17  18   -3511  135243
  -3  17  18   25302   93858
  -2  17  18  188657  153156
  -1  17  18 -105434  105434
   0  17  18  240497   89322
   1  17  18  146576  127457
   2  17  18  467189  122719
 -10  18  18  230803  191595
  -9  18  18   77959  181131
  -8  18  18  146486  166035
  -7  18  18  241105  153558
  -6  18  18   85336  151947
  -5  18  18  461500  165231
  -4  18  18  -85789  101257
  -3  18  18  226364  119646
  -2  18  18  235788   85716
  -1  18  18  103940   88079
   0  18  18 -118393  152710
   1  18  18  -94178  131870
  -9  19  18  518070  191193
  -8  19  18   31638  178917
  -7  19  18  370679  178111
  -6  19  18   -8452  159193
  -5  19  18   63135  108427
  -4  19  18 -111703  111703
  -3  19  18   77139  115956
  -2  19  18   -5427   91803
  -1  19  18  137152   96696
   0  19  18  -21086  101865
  -8  20  18  180016  207092
  -7  20  18  192435  190186
  -6  20  18  134381  187972
  -5  20  18  343163  128047
  -4  20  18   45211  262337
  -3  20  18  436176  128063
  -2  20  18   67206  206215
  -1  20  18  348060  170665
   0  20  18   26206  192602
  -7  21  18  425166  216954
  -6  21  18 -197834  197834
  -5  21  18 -196225  196225
  -4  21  18   78164  193809
  -2  21  18  108527  166841
  -1  21  18  -98615  190388
  -2  22  18  109512  177306
  -1  22  18  135794  207092
  -5   0  19 1158402   94791
  -3   0  19 1590081  128603
  -1   0  19   42665   84728
   1   0  19  201658   79496
   3   0  19  219621   81597
   5   0  19  525629  167444
   7   0  19 -199243  199243
  -7   1  19  369016   87345
  -6   1  19   54078   55926
  -5   1  19  -41186   54173
  -4   1  19  -92857  142086
  -3   1  19  114184   59122
  -2   1  19   45009   60480
  -1   1  19  357210   66990
   0   1  19   85895   51229
   1   1  19  441021   67023
   2   1  19  135327   50735
   3   1  19  646902   79884
   4   1  19  119484   80697
   5   1  19  -85741  111927
   6   1  19  -16052  133390
   7   1  19  -70826  143172
  -7   2  19  148091   60678
  -6   2  19  675416   65746
  -5   2  19  477572   60650
  -4   2  19  673853  131621
  -3   2  19  432029   63895
  -2   2  19  428311  107973
  -1   2  19  -42455   60165
   0   2  19  -32785   52741
   1   2  19   37107   54157
   2   2  19  143853   60258
   3   2  19  132812   59471
   4   2  19  187212   69911
   5   2  19  255548  142086
   6   2  19  175271  136590
   7   2  19  -37076  146968
  -8   3  19  322183   86540
  -7   3  19   67945   80904
  -6   3  19   69739   55532
  -5   3  19   87508  148527
  -4   3  19   -7245   55150
  -3   3  19   70975   63797
  -2   3  19  424633   66009
  -1   3  19   38610   47035
   0   3  19  708132   77109
   1   3  19   84340  102792
   2   3  19  440241   64360
   3   3  19   27194   69614
   4   3  19  134391   69077
   5   3  19   15743  128301
   6   3  19   73811  137068
   7   3  19 -220173  220173
  -8   4  19  641202   95596
  -7   4  19   51086   56153
  -6   4  19  833270   88351
  -5   4  19  344294   63697
  -4   4  19  680947  114817
  -3   4  19   37517   58655
  -2   4  19  799979  114314
  -1   4  19   24011   58064
   0   4  19   40576   67663
   1   4  19  -54786   54786
   2   4  19   98680   78684
   3   4  19   16761   71957
   4   4  19  351070  107692
   5   4  19   76546  112281
   6   4  19  432735  140831
  -9   5  19   25157   87747
  -8   5  19  135043   82917
  -7   5  19   11511   56986
  -6   5  19   29923   57744
  -5   5  19   22489  101534
  -4   5  19   50878  134036
  -3   5  19   39558  131621
  -2   5  19  798935   53640
  -1   5  19  381808   53438
   0   5  19  656822   93182
   1   5  19  100535   79684
   2   5  19  497987  122072
   3   5  19   40426   80028
   4   5  19  380126   98433
   5   5  19  244724  120167
   6   5  19 -125256  137692
  -9   6  19  284924   95395
  -8   6  19  142214   86942
  -7   6  19  711787   68513
  -6   6  19  295468   62470
  -5   6  19  837457   70480
  -4   6  19  483397   66769
  -3   6  19  692866   70940
  -2   6  19  232080   65691
  -1   6  19   16835   58404
   0   6  19   51672   68548
   1   6  19  -63780   63780
   2   6  19   54221   65890
   3   6  19   82510   93704
   4   6  19   82164   82692
   5   6  19  170793  125015
   6   6  19  232673  142442
  -9   7  19  498463  100226
  -8   7  19   98326  132527
  -7   7  19  221022   63347
  -6   7  19  104835   63194
  -5   7  19  -32917  110389
  -4   7  19   27958   84226
  -3   7  19  570800   69371
  -2   7  19   35632   47385
  -1   7  19  299073   54448
   0   7  19   15055   71998
   1   7  19  673378   76283
   2   7  19   60542   70009
   3   7  19  132602   78855
   4   7  19  113380   90134
   5   7  19  170208  319091
   6   7  19 -141243  141243
  -9   8  19  210606  102842
  -8   8  19   42922   65675
  -7   8  19  567595   69914
  -6   8  19  -52860   73257
  -5   8  19 1204240   85150
  -4   8  19   61284   64721
  -3   8  19  484867   72630
  -2   8  19  -43635   67875
  -1   8  19  484927   74926
   0   8  19   63096   76453
   1   8  19   68759   63417
   2   8  19   55313   70521
   3   8  19  144719   81658
   4   8  19   19097   91807
   5   8  19  345283  220275
   6   8  19   28327  203469
  -9   9  19  338476  107269
  -8   9  19   44715   70663
  -7   9  19  132095   82615
  -6   9  19   75257   69163
  -5   9  19   70823   89055
  -4   9  19  -93359  143495
  -3   9  19  143844   70505
  -2   9  19  121781   51220
  -1   9  19  505116  165597
   0   9  19  155993   92690
   1   9  19  436579   74046
   2   9  19  105623   74166
   3   9  19  252108   84039
   4   9  19  -83461  119040
   5   9  19   96015  193608
  -9  10  19   88307   80253
  -8  10  19  337431   78829
  -7  10  19  178190   88553
  -6  10  19  444752   73641
  -5  10  19  746039   93684
  -4  10  19  368141   73783
  -3  10  19   84304   72855
  -2  10  19  213976   55552
  -1  10  19  155756   88452
   0  10  19   37394   73886
   1  10  19   39097   86140
   2  10  19   77256   76245
   3  10  19  101269  110751
   4  10  19  297854  124392
   5  10  19   73079  136869
  -9  11  19  -93383  114917
  -8  11  19  284611   85130
  -7  11  19   68177   76115
  -6  11  19   11127   70558
  -5  11  19  -95248  135143
  -4  11  19   73702   72783
  -3  11  19   38052   76704
  -2  11  19  708260   63167
  -1  11  19  -10644   80261
   0  11  19  455474   69516
   1  11  19  -37867   72047
   2  11  19  390932  122863
   3  11  19  -30842   93108
   4  11  19  -12056  128469
  -9  12  19   47723  122163
  -8  12  19  419729   86421
  -7  12  19   80026   80416
  -6  12  19  555054   83741
  -5  12  19  -74621   74621
  -4  12  19  652582   85409
  -3  12  19    4656  108175
  -2  12  19  129186   77384
  -1  12  19   57916   85510
   0  12  19  -69175   69175
   1  12  19  103347   95742
   2  12  19  123761   86115
   3  12  19  -82115  146911
   4  12  19  407710  126681
  -9  13  19  175864  132225
  -8  13  19  358847  135243
  -7  13  19  117985   89458
  -6  13  19  -23658  164628
  -5  13  19  -14366  114414
  -4  13  19   -7669   79059
  -3  13  19  141046  106565
  -2  13  19  119520  106244
  -1  13  19   91544   68629
   0  13  19  599275   79092
   1  13  19  198501   91735
   2  13  19  360547  111531
   3  13  19  184219  331267
 -11  14  19 -237080  237080
  -9  14  19  130161  144301
  -8  14  19   42539  135243
  -7  14  19  118225   89205
  -6  14  19  395120  215142
  -5  14  19  289654   86607
  -4  14  19   88683   87296
  -3  14  19  315515   96703
  -2  14  19  -24397   91684
  -1  14  19   46257  124644
   0  14  19  -98748   98748
   1  14  19   -3961   95552
   2  14  19   66347  101177
   3  14  19     -43  153055
 -11  15  19  353727  269080
  -9  15  19  338312  162414
  -8  15  19  -39647  142086
  -7  15  19  214902  103747
  -6  15  19 -114414  114414
  -5  15  19  -88209   88209
  -4  15  19    8443   97408
  -3  15  19  167406  139771
  -2  15  19  -52675  120553
  -1  15  19  198894   80253
   0  15  19 -103289  103289
   1  15  19  298403   98184
   2  15  19  -41479  100659
 -10  16  19   38852  253583
  -9  16  19   95820  173482
  -8  16  19   94145  162816
  -7  16  19  292841  221583
  -6  16  19   66543  131218
  -5  16  19  586214  103226
  -4  16  19   13468  196023
  -3  16  19  484775  166035
  -2  16  19   21698   81471
  -1  16  19  285645   88165
   0  16  19    5941   92644
   1  16  19   20224  148395
 -10  17  19  192482  200854
  -9  17  19   59220  179118
  -8  17  19  100876  171469
  -7  17  19  194073  158590
  -6  17  19   86400  104539
  -5  17  19 -103267  103267
  -4  17  19   61022  105544
  -3  17  19  148757  108405
  -2  17  19   86570   84215
  -1  17  19  232070   93434
   0  17  19  -30839  101678
   1  17  19 -116527  173281
  -9  18  19   91617  201055
  -8  18  19 -174489  174489
  -7  18  19  295615  176098
  -6  18  19  253595  117231
  -5  18  19  269907  238086
  -4  18  19  309783  119492
  -3  18  19  103985  118527
  -2  18  19  281196  125795
  -1  18  19   52184  150536
   0  18  19    3717  180527
  -8  19  19  128804  204879
  -7  19  19 -113306  187771
  -6  19  19  -36820  129693
  -5  19  19   -1303  125693
  -4  19  19  114108  125776
  -3  19  19   30382  156678
  -2  19  19  -39776  114563
  -1  19  19   38329  178716
   0  19  19  398207  200653
  -7  20  19   85242  207897
  -6  20  19  255090  204879
  -5  20  19  -56151  200451
  -4  20  19  388398  189985
  -2  20  19 -109885  174489
  -1  20  19 -104653  194816
  -1  21  19  122766  200048
  -6   0  20  809148  103445
  -4   0  20  589329  101835
  -2   0  20   33560   99017
   0   0  20  135491  109482
   2   0  20  430294  102439
   4   0  20  409816  160804
  -8   1  20   57307   87345
  -7   1  20  -21542   61253
  -6   1  20   38876   62544
  -5   1  20   12775   62529
  -4   1  20  539844   70978
  -3   1  20  404600  134339
  -2   1  20  364469  168653
  -1   1  20    2033   79496
   0   1  20  339776   77828
   1   1  20   28667   62282
   2   1  20  408018   85809
   3   1  20   26178   65676
   4   1  20   24038  110271
   5   1  20    7737  264753
  -8   2  20  363998   94389
  -7   2  20  390291  126389
  -6   2  20  326113   67585
  -5   2  20  348409   69953
  -4   2  20  432279   67567
  -3   2  20  288865   69277
  -2   2  20  -33569   68998
  -1   2  20   58221   70130
   0   2  20   35038   60166
   1   2  20   66316   60661
   2   2  20   65536   77264
   3   2  20  338402   81253
   4   2  20  255932  115767
   5   2  20  189251  128860
  -9   3  20  285381   95596
  -8   3  20   45859   88352
  -7   3  20  -60584   60584
  -6   3  20  -53010   59840
  -5   3  20  108157   65035
  -4   3  20  142967  101433
  -3   3  20  569264  143998
  -2   3  20  316943   72340
  -1   3  20 1375432  115923
   0   3  20  130373   58500
   1   3  20  353199   65780
   2   3  20  120581   72226
   3   3  20  229595  160392
   4   3  20  -93022  115052
   5   3  20   26980  133394
  -9   4  20  586552  100427
  -8   4  20  -70841   89559
  -7   4  20  339778   73257
  -6   4  20   32895   65534
  -5   4  20  689972   73500
  -4   4  20   50772   65248
  -3   4  20   40145  130615
  -2   4  20  -15550   79396
  -1   4  20   46479   51628
   0   4  20   20653   58986
   1   4  20   50854   90800
   2   4  20   53014   72732
   3   4  20  239638   80170
   4   4  20   73463  118792
   5   4  20  218439  133031
  -9   5  20  176844   96603
  -8   5  20  -27339   66576
  -7   5  20   44411  118540
  -6   5  20  -65501   65501
  -5   5  20   21511   65045
  -4   5  20   62011  119948
  -3   5  20  595575   76821
  -2   5  20  173700   73628
  -1   5  20  651345  108477
   0   5  20  131815   62075
   1   5  20  543795  166596
   2   5  20   -6473   71470
   3   5  20  150727   86214
   4   5  20   57235  122975
   5   5  20   41716  128219
 -10   6  20  205395  106263
  -9   6  20   46498   99017
  -8   6  20  298433   71529
  -7   6  20  481620   72897
  -6   6  20  297723   71246
  -5   6  20   98375   69098
  -4   6  20   76499   75873
  -3   6  20   80629   72100
  -2   6  20  217735   74140
  -1   6  20   67728   65015
   0   6  20   38373   61478
   1   6  20   -7233   72628
   2   6  20  169322   76804
   3   6  20  180139   86992
   4   6  20  122883  120657
   5   6  20 -123870  276123
 -10   7  20  352967  116326
  -9   7  20    1207  105256
  -8   7  20   76344   72846
  -7   7  20   16292  127797
  -6   7  20   72549   71914
  -5   7  20  328756   72042
  -4   7  20  276646   71464
  -3   7  20  157803  106465
  -2   7  20  531028   99380
  -1   7  20   58751  164023
   0   7  20 1023653  127655
   1   7  20  112225   87082
   2   7  20  322261   79703
   3   7  20  -89145   89145
   4   7  20  -80982  125002
 -10   8  20  332364  122565
  -9   8  20  -38641  109684
  -8   8  20  582310   82816
  -7   8  20   32023   71672
  -6   8  20  569672   78398
  -5   8  20  -33680   69867
  -4   8  20  240716   72384
  -3   8  20   63182   76178
  -2   8  20   21166   76915
  -1   8  20   29232   81442
   0   8  20   20523   65328
   1   8  20  -70230   70230
   2   8  20  131681   80364
   3   8  20   51157   92238
   4   8  20  432693  137468
  -9   9  20  -28376  111897
  -8   9  20  303365   81457
  -7   9  20  -74947   77432
  -6   9  20   76720  127093
  -5   9  20   49034  128402
  -4   9  20  357504  177608
  -3   9  20   76741   79890
  -2   9  20  669485   92358
  -1   9  20  204859   87907
   0   9  20  729111   76108
   1   9  20   38392   89417
   2   9  20  114198  105819
   3   9  20  116967   94952
   4   9  20  -84072  127630
 -11  10  20   -1409  141683
 -10  10  20  394157  147520
  -9  10  20  107300  114314
  -8  10  20  147228  142791
  -7  10  20  416070   84309
  -6  10  20  306308   85798
  -5  10  20  286329   81467
  -4  10  20  -56346   76553
  -3  10  20   58118   82960
  -2  10  20   38394  125382
  -1  10  20   43035  260426
   0  10  20  -31361   74125
   1  10  20   63327   78375
   2  10  20  283341  107681
   3  10  20  273639  240098
 -10  11  20   26780   97109
  -9  11  20  149122   91682
  -8  11  20  -22078   84519
  -7  11  20   23143   82846
  -6  11  20   96864  205483
  -5  11  20  208819  153658
  -4  11  20  -73780  117935
  -3  11  20  288595   89911
  -2  11  20   21615   88489
  -1  11  20  493016   83497
   0  11  20   43672   76753
   1  11  20  176753   83078
   2  11  20   92417   95619
   3  11  20  -84189  121731
 -10  12  20   26386  103645
  -9  12  20  450777  131319
  -8  12  20   79578   91644
  -7  12  20  752595  123671
  -6  12  20   60142   86595
  -5  12  20  175675  225105
  -4  12  20   27408   85578
  -3  12  20  248379   92071
  -2  12  20   22435   84173
  -1  12  20   20970   74984
   0  12  20   28307   78885
   1  12  20  -18352   86696
   2  12  20 -124018  212336
 -10  13  20  124481  160401
  -9  13  20  280491  104381
  -8  13  20  122859  108175
  -7  13  20   15376  226915
  -6  13  20  -88008   88008
  -5  13  20  -49470   87065
  -4  13  20   70698   92152
  -3  13  20  226735   96696
  -2  13  20  134576  216148
  -1  13  20  216618   78659
   0  13  20  146068  106742
   1  13  20  274493   98390
   2  13  20  -94814   94814
 -10  14  20   68606  173281
  -9  14  20   58009  107252
  -8  14  20  231469  134942
  -7  14  20   92045   97810
  -6  14  20  150051  112804
  -5  14  20   74025   93141
  -4  14  20  169613  103948
  -3  14  20  -55008   98155
  -2  14  20  134890  220275
  -1  14  20   77920   85722
   0  14  20  -88051   90303
   1  14  20   51962  145508
  -9  15  20  -38239  169457
  -8  15  20   41565  142691
  -7  15  20  -68442  135243
  -6  15  20   77302  257004
  -5  15  20   65710  190590
  -4  15  20  190748  120653
  -3  15  20   52927  129005
  -2  15  20  463406   88425
  -1  15  20  -89092   89092
   0  15  20  396455  101004
   1  15  20  143854  179721
  -9  16  20  195629  193005
  -8  16  20  392291  324727
  -7  16  20   22916  110125
  -6  16  20  453629  219167
  -5  16  20   27366  122263
  -4  16  20  121042  112514
  -3  16  20  -90870  114889
  -2  16  20  144461  118680
  -1  16  20   58209  145242
   0  16  20  143788  169256
  -9  17  20  -20527  202665
  -8  17  20   67563  124856
  -7  17  20  -99785  121641
  -6  17  20   63366  123872
  -5  17  20  128338  248954
  -4  17  20  156394  171771
  -3  17  20  160563  192804
  -2  17  20  225414  259519
  -1  17  20  111813  164023
   0  17  20  315514  188577
  -8  18  20  146847  226212
  -7  18  20  307663  161809
  -6  18  20   98488  130891
  -5  18  20  220423  132785
  -4  18  20 -125819  125819
  -3  18  20   63209  180527
  -2  18  20   60624  158186
  -1  18  20   76791  175696
   0  18  20 -185156  185156
  -7  19  20 -181131  204879
  -6  19  20  -58364  205080
  -5  19  20  252398  197834
  -2  19  20   28382  162010
  -1  19  20  345537  200250
  -1  20  20  -95797  194010
  -9   0  21  845382  119143
  -7   0  21 1157482  122565
  -5   0  21  285769   99822
  -3   0  21  351237  113106
  -1   0  21  120167  112502
   1   0  21  232671  131419
   3   0  21  566675  114153
  -9   1  21   11566   75279
  -8   1  21   10256   73490
  -7   1  21   -2622   84125
  -6   1  21  141948  100326
  -5   1  21  293130   72600
  -4   1  21  143517   73136
  -3   1  21  571445   83016
  -2   1  21   45488   72425
  -1   1  21  209437   81471
   0   1  21  118542   84907
   1   1  21  165498   70422
   2   1  21   98325   82422
   3   1  21   36721   84939
   4   1  21   48844  128578
  -9   2  21  703452  117734
  -8   2  21   72672   71560
  -7   2  21  229139   74422
  -6   2  21  128708   71928
  -5   2  21  203294   71714
  -4   2  21  196461   75494
  -3   2  21   58676   79194
  -2   2  21  -31144   74205
  -1   2  21  113495  104855
   0   2  21   -4400  152351
   1   2  21  217192   80784
   2   2  21  377133   83416
   3   2  21  205255  119742
   4   2  21  262705  161809
 -10   3  21 -105659  105659
  -9   3  21   46441  104048
  -8   3  21  100285  205382
  -7   3  21   -9640  162917
  -6   3  21  201935   89458
  -5   3  21   54358   70903
  -4   3  21  346081   77984
  -3   3  21   24632   96402
  -2   3  21  488704   85877
  -1   3  21  287222  103143
   0   3  21  205120   68247
   1   3  21   75408   72973
   2   3  21  104865   83752
   3   3  21  -16869   93647
   4   3  21   63973  139671
 -10   4  21  689154  114917
  -9   4  21  112936  108075
  -8   4  21  791501   83365
  -7   4  21  -18716  101232
  -6   4  21  188398   74128
  -5   4  21   65740   71785
  -4   4  21  234313  141382
  -3   4  21  -15519  125081
  -2   4  21   17762   76703
  -1   4  21  -23402   78765
   0   4  21  326308   70171
   1   4  21  -93211  138459
   2   4  21  531162   94625
   3   4  21  115835  130806
   4   4  21  298854  134976
 -10   5  21   53037  113910
  -9   5  21  -80301  108477
  -8   5  21   35669   77173
  -7   5  21   71379   75152
  -6   5  21   52196   75391
  -5   5  21  185482   74784
  -4   5  21  290658   78760
  -3   5  21  246756   78838
  -2   5  21  754881   89415
  -1   5  21  150268  190590
   0   5  21  379614   74551
   1   5  21    -651  105842
   2   5  21  -39439  126702
   3   5  21   76601  124073
 -10   6  21   71245  117734
  -9   6  21  215455  112905
  -8   6  21  365821   82796
  -7   6  21  251862  109482
  -6   6  21  179006   79978
  -5   6  21  192273   76654
  -4   6  21  -43219   77121
  -3   6  21   17187  122867
  -2   6  21   -7013   97709
  -1   6  21  -68003  137056
   0   6  21  166978   74096
   1   6  21  332552  145838
   2   6  21  197473   89035
   3   6  21  245241  125772
 -10   7  21  -88954  125181
  -9   7  21  108525  116125
  -8   7  21   51513   84530
  -7   7  21  121948  165834
  -6   7  21   49379   79513
  -5   7  21  330368  140879
  -4   7  21   50346   77484
  -3   7  21  774207  111998
  -2   7  21   44689  148225
  -1   7  21  575679   97689
   0   7  21  134907   81317
   1   7  21  240933   82021
   2   7  21    4445  106594
   3   7  21   44567  124754
 -10   8  21  -55679  108980
  -9   8  21  184505  128804
  -8   8  21   27579   86948
  -7   8  21  654493   87795
  -6   8  21   97732   92879
  -5   8  21  452243   83233
  -4   8  21   29985   80140
  -3   8  21   44638   88084
  -2   8  21  -46413  117533
  -1   8  21   56895   70090
   0   8  21  -24686   74488
   1   8  21  470283   85660
   2   8  21   40169  115405
   3   8  21  415038  126068
 -11   9  21  173821  148326
 -10   9  21   88420  100192
  -9   9  21    6911   98011
  -8   9  21  -86735   86735
  -7   9  21   43466   84915
  -6   9  21   73300   86167
  -5   9  21  334387   87395
  -4   9  21   75549   86526
  -3   9  21  225822   89153
  -2   9  21  115376   92204
  -1   9  21  411152   75595
   0   9  21   30469   78179
   1   9  21  117450   86972
   2   9  21  -98292   98292
 -11  10  21  274356  160804
 -10  10  21  390808  105947
  -9  10  21  295497  100829
  -8  10  21  310804   97007
  -7  10  21  196881   89440
  -6  10  21  274113   88797
  -5  10  21  176661   89210
  -4  10  21   91658   88271
  -3  10  21   73916   90513
  -2  10  21   20011   72360
  -1  10  21   32885   76059
   0  10  21   76765   84805
   1  10  21  162954   91403
   2  10  21  220991   96911
 -11  11  21  152956  165633
 -10  11  21   39051  109638
  -9  11  21   15457  100326
  -8  11  21  150897   97565
  -7  11  21  -26416  253885
  -6  11  21  227843   92746
  -5  11  21   80606   91558
  -4  11  21  488591  214941
  -3  11  21  114373   96813
  -2  11  21  495427  127595
  -1  11  21   87698   81707
   0  11  21  251904   90003
   1  11  21  -36966   96289
 -11  12  21   75788  190791
 -10  12  21  360812  119782
  -9  12  21  175738  159595
  -8  12  21  433438  103831
  -7  12  21   61357   97097
  -6  12  21  362035  100175
  -5  12  21   45563   93584
  -4  12  21  244491  109382
  -3  12  21  -72666   98471
  -2  12  21  -14799  128301
  -1  12  21  -84540   84540
   0  12  21  175251   96189
   1  12  21  -96198   96198
 -10  13  21  226378  134842
  -9  13  21   56069  146111
  -8  13  21   48761  104098
  -7  13  21  120161  102767
  -6  13  21  159722  101605
  -5  13  21  -83230  102792
  -4  13  21  195586  103430
  -3  13  21  200379  133131
  -2  13  21  304571  117235
  -1  13  21   33646  178600
   0  13  21  205499  121243
   1  13  21  -29182  174489
 -10  14  21  -21271  183444
  -9  14  21  389682  127401
  -8  14  21  195204  188175
  -7  14  21  411028  110713
  -6  14  21  137054  134036
  -5  14  21  226433  109193
  -4  14  21  210610  105945
  -3  14  21  -98922  108938
  -2  14  21    7234   88996
  -1  14  21  -40833   96377
   0  14  21   18498  128344
  -9  15  21 -149432  149432
  -8  15  21 -184653  184653
  -7  15  21 -105709  112903
  -6  15  21   75584  157181
  -5  15  21  220941  132628
  -4  15  21  -19788  117735
  -3  15  21  409750  220275
  -2  15  21  -82853  130918
  -1  15  21  175895  121085
   0  15  21  -19321  181733
  -8  16  21 -130445  130445
  -7  16  21  262204  157381
  -6  16  21  135995  127935
  -5  16  21  341860  130033
  -4  16  21   37303  128607
  -3  16  21   85941  168552
  -2  16  21   96093  205281
  -1  16  21  -40452  170263
   0  16  21  152197  190992
  -8  17  21   49633  145630
  -7  17  21   71617  136100
  -6  17  21 -131186  131186
  -5  17  21  330170  147319
  -4  17  21   70864  187168
  -1  17  21  307844  185356
  -7  18  21  363566  220577
  -6  18  21  264348  239091
  -1  18  21 -189985  189985
 -10   0  22  532250  131218
  -8   0  22  110288  116125
  -6   0  22  220239  121960
  -4   0  22   87786  113709
  -2   0  22  140286  127595
   0   0  22  216366  148930
   2   0  22  300960  168250
 -10   1  22   77702   89853
  -9   1  22  -69360  101433
  -8   1  22  -35151   98314
  -7   1  22   42166   81952
  -6   1  22  508116   88226
  -5   1  22  -57680   79678
  -4   1  22  619389   84328
  -3   1  22   64210  136552
  -2   1  22  233659   90623
  -1   1  22   25297   93989
   0   1  22  114508   99403
   1   1  22   76481  103985
   2   1  22   54416   94045
   3   1  22   47765  163620
 -10   2  22  483458   92939
  -9   2  22  112543   87351
  -8   2  22  535154  103043
  -7   2  22  143646   79646
  -6   2  22  -80317   80317
  -5   2  22   78463   82628
  -4   2  22  -52798   77982
  -3   2  22  109408   83659
  -2   2  22  118995   88445
  -1   2  22  151467   95194
   0   2  22  -94915   94915
   1   2  22  234923   85489
   2   2  22  170644   95600
 -10   3  22  -17919   90553
  -9   3  22   62488  185859
  -8   3  22   61675  160703
  -7   3  22  191657   81836
  -6   3  22  -67678   80176
  -5   3  22  593925  117633
  -4   3  22   52378   86841
  -3   3  22  398102   87164
  -2   3  22  231998   91290
  -1   3  22  123977   91186
   0   3  22  -71716  125985
   1   3  22   26382   84484
   2   3  22   59489   97596
 -10   4  22   31350   92529
  -9   4  22  772969   94135
  -8   4  22   61466   87573
  -7   4  22  216882   99320
  -6   4  22   41041   82142
  -5   4  22   24172  107369
  -4   4  22   66340   82104
  -3   4  22   73178  240803
  -2   4  22   41707  112100
  -1   4  22  469572  179218
   0   4  22   17341   77066
   1   4  22  303812   89197
   2   4  22   44623   98345
 -10   5  22   32590   92341
  -9   5  22   19957   88728
  -8   5  22   29073   88072
  -7   5  22   55371  105357
  -6   5  22  212935  120653
  -5   5  22  265082   87448
  -4   5  22  370906   91178
  -3   5  22  404556   90395
  -2   5  22  164546  245533
  -1   5  22  179521   95416
   0   5  22   -5615   85903
   1   5  22  -86603   86603
   2   5  22     601  155136
 -10   6  22  328577  101171
  -9   6  22  309542   97694
  -8   6  22  181046   92634
  -7   6  22  154641   88714
  -6   6  22  168645   88998
  -5   6  22   37321   88096
  -4   6  22  -74288   87229
  -3   6  22   95495   91164
  -2   6  22  178866   97653
  -1   6  22  161809   77202
   0   6  22  353469   84823
   1   6  22  104817   90942
   2   6  22  395785  203555
 -10   7  22  -85684  102176
  -9   7  22   46285  142489
  -8   7  22   44357   90077
  -7   7  22   31544  210513
  -6   7  22  481435   93735
  -5   7  22  -81540  219167
  -4   7  22  368683  215645
  -3   7  22   87805   89928
  -2   7  22  274428   99790
  -1   7  22  -72236  121386
   0   7  22  112543   87752
   1   7  22  110748   92767
   2   7  22   50400  165633
 -11   8  22   47967  163620
 -10   8  22  378610  137156
  -9   8  22   92577  101883
  -8   8  22  444418  100540
  -7   8  22    9263  155973
  -6   8  22  216886   93938
  -5   8  22  108661  125583
  -4   8  22   52165  120955
  -3   8  22   59438  147319
  -2   8  22  250656  147319
  -1   8  22   -6299   96973
   0   8  22  344779   88651
   1   8  22  -95988   95988
 -11   9  22   31671  164426
 -10   9  22   23917  112708
  -9   9  22  -96134  104406
  -8   9  22   89047   99675
  -7   9  22   16138   95560
  -6   9  22  400269  106465
  -5   9  22  186078  254991
  -4   9  22  624066  102177
  -3   9  22  108029   98855
  -2   9  22  232297  102439
  -1   9  22   50186   83939
   0   9  22  129416   95644
   1   9  22  -58783   95685
 -10  10  22  194359  115626
  -9  10  22  376680  150640
  -8  10  22  240068  106869
  -7  10  22  111796  161306
  -6  10  22  105963  101130
  -5  10  22  -51332  111797
  -4  10  22   55085  102576
  -3  10  22  -16141  105784
  -2  10  22   -9201  109422
  -1  10  22  193665   89476
   0  10  22  231364   98741
   1  10  22  173237  167847
 -10  11  22   72779  156779
  -9  11  22   -5493  116104
  -8  11  22   49064  156073
  -7  11  22  284718  107085
  -6  11  22  166433  107619
  -5  11  22  602762  169557
  -4  11  22  -24455  107941
  -3  11  22  542301  129206
  -2  11  22   59553  116408
  -1  11  22   -1122   92828
   0  11  22   42702   96336
   1  11  22  100339  176703
 -10  12  22   22733  130475
  -9  12  22  381606  124616
  -8  12  22  -44867  178010
  -7  12  22  568315  115336
  -6  12  22  -50573  105936
  -5  12  22  153705  110568
  -4  12  22  124384  112140
  -3  12  22   55097  116382
  -2  12  22  -27161  117398
  -1  12  22  -95092   95092
   0  12  22  -54741  167444
  -9  13  22   94652  238086
  -8  13  22   79415  120248
  -7  13  22  306956  228325
  -6  13  22   98090  190489
  -5  13  22  231838  229734
  -4  13  22   39722  117113
  -3  13  22  329892  123494
  -2  13  22  -18119  146615
  -1  13  22  -15630  155671
   0  13  22  121321  183947
  -9  14  22  155188  139819
  -8  14  22  404992  482814
  -7  14  22  211380  124935
  -6  14  22    -621  329054
  -5  14  22  116906  137256
  -4  14  22   54342  129909
  -3  14  22 -144804  144804
  -2  14  22   89157  188376
  -1  14  22   69636  168452
   0  14  22  335244  186565
  -8  15  22   89500  143518
  -7  15  22   46055  139320
  -6  15  22  264447  135651
  -5  15  22  198992  133480
  -4  15  22  506300  139744
  -3  15  22  119496  211922
  -1  15  22   75086  174288
   0  15  22 -175093  175093
  -7  16  22  218895  216351
  -6  16  22   98414  210916
  -1  16  22  177761  186766
 -11   0  23  370081  143093
  -9   0  23  293602  143495
  -7   0  23 -111093  122565
  -5   0  23  185545  133231
  -3   0  23  569860  142892
  -1   0  23  108692  143293
   1   0  23  485144  192401
 -11   1  23   56151  135646
 -10   1  23  -64770  174389
  -9   1  23  179350  156879
  -8   1  23  -94328   94472
  -7   1  23  513529  128804
  -6   1  23  249517  139771
  -5   1  23  840154  101525
  -4   1  23   91318   91119
  -3   1  23  451183  175293
  -2   1  23   51353   99541
  -1   1  23  276594  108913
   0   1  23  162132  118934
   1   1  23   88290  262739
 -11   2  23  149976  129910
 -10   2  23   74868  103418
  -9   2  23  235907   98816
  -8   2  23  130074   94675
  -7   2  23  100672   87666
  -6   2  23   14352   89220
  -5   2  23   62694   91932
  -4   2  23   55626   95884
  -3   2  23   87623   95408
  -2   2  23  142981  102266
  -1   2  23  187782  126791
   0   2  23  287703  119321
   1   2  23  281059  123807
 -10   3  23   38701  220073
  -9   3  23  146183   99960
  -8   3  23  183719   97421
  -7   3  23   29301  107671
  -6   3  23  236521   95692
  -5   3  23   49244   90934
  -4   3  23  710435  101985
  -3   3  23   94868   96075
  -2   3  23  173080  104076
  -1   3  23   73332  108510
   0   3  23  -73736  260325
   1   3  23   36310   96938
 -11   4  23   62410  158992
 -10   4  23  526397  111061
  -9   4  23  -37907  100140
  -8   4  23  258906   97934
  -7   4  23   32177  204879
  -6   4  23   31375   95100
  -5   4  23  -90184   90184
  -4   4  23  379494  120150
  -3   4  23   -5411   96322
  -2   4  23  198003  106553
  -1   4  23  134082  169055
   0   4  23  222147  123728
   1   4  23   64272   99594
 -11   5  23 -155570  155570
 -10   5  23   35286  106240
  -9   5  23    9174  102692
  -8   5  23  398947  105397
  -7   5  23   61769   96307
  -6   5  23  558725  222488
  -5   5  23   72685  115621
  -4   5  23  410887   99463
  -3   5  23   34982  114213
  -2   5  23  215511  104225
  -1   5  23   76687  114606
   0   5  23   46483   95029
   1   5  23   53563  178010
 -11   6  23  719919  175897
 -10   6  23  204698  197131
  -9   6  23  234502  108117
  -8   6  23  111616  103560
  -7   6  23   81674  102055
  -6   6  23  -26601   96334
  -5   6  23   28653  143998
  -4   6  23   29553   99902
  -3   6  23   90017  104441
  -2   6  23  249990  109077
  -1   6  23  275720  121675
   0   6  23  188180  101059
   1   6  23  172829  165633
 -10   7  23   61891  118147
  -9   7  23  211991  112747
  -8   7  23   41236  105778
  -7   7  23  586987  113206
  -6   7  23  123713  102902
  -5   7  23  288522  122666
  -4   7  23   26101  104301
  -3   7  23  127987  109028
  -2   7  23   10507  267770
  -1   7  23   86721   92054
   0   7  23   41501   97714
   1   7  23 -173683  173683
 -10   8  23   67856  123902
  -9   8  23  190979  116323
  -8   8  23  -11312  226312
  -7   8  23  193815  341532
  -6   8  23  -98607  204073
  -5   8  23  128372  122867
  -4   8  23   44566  304400
  -3   8  23  229440  113607
  -2   8  23 -164250  176904
  -1   8  23  330681  141630
   0   8  23   25933   98454
   1   8  23  310211  168452
 -10   9  23   94251  128003
  -9   9  23  160625  120854
  -8   9  23  -47167  114289
  -7   9  23  463658  111854
  -6   9  23  -33183  109277
  -5   9  23  335936  112276
  -4   9  23 -105810  110352
  -3   9  23  224450  120106
  -2   9  23   30161  122845
  -1   9  23  -94295   94295
   0   9  23  -36226  161005
 -10  10  23  161529  133342
  -9  10  23  -16385  322312
  -8  10  23  262317  123805
  -7  10  23 -113575  113575
  -6  10  23 -111779  111779
  -5  10  23  112175  138061
  -4  10  23   33247  117426
  -3  10  23   68855  125184
  -2  10  23  185498  130893
  -1  10  23  -31279  107613
   0  10  23  219487  171872
  -9  11  23 -128150  128150
  -8  11  23  348201  129996
  -7  11  23  145193  145306
  -6  11  23  129901  115831
  -5  11  23   89056  122144
  -4  11  23  264210  180225
  -3  11  23   34219  168048
  -2  11  23  170092  131972
  -1  11  23   86712  154766
   0  11  23   32580  188778
  -9  12  23  116434  141419
  -8  12  23  240635  221784
  -7  12  23   96115  160703
  -6  12  23   54106  122776
  -5  12  23  -11933  237281
  -4  12  23   67506  133538
  -3  12  23   93273  127680
  -1  12  23   64074  169055
   0  12  23 -183947  183947
  -8  13  23  454731  143457
  -7  13  23  115818  133759
  -6  13  23  452450  222991
  -5  13  23  194431  137747
  -4  13  23  -98895  131086
  -1  13  23 -177708  177708
   0  13  23   42195  190186
  -7  14  23  119188  158086
  -6  14  23   82895  139942
  -5  14  23  -75671  193206
  -1  14  23 -177306  177306
  -6  15  23 -168653  236879
 -10   0  24  405877  165633
  -8   0  24  143123  149131
  -6   0  24  253396  152150
  -4   0  24  336697  158791
  -2   0  24 1030120  185557
 -10   1  24  330522  217759
  -9   1  24   55877  106554
  -8   1  24  279710  105718
  -7   1  24  113157  104526
  -6   1  24  721762  111754
  -5   1  24  134264  138867
  -4   1  24  344448  113131
  -3   1  24  -96747  105138
  -2   1  24 -115556  115556
  -1   1  24  -73644  131876
 -10   2  24  242650  116809
  -9   2  24 -108188  108188
  -8   2  24  -30280  105738
  -7   2  24 -100019  100019
  -6   2  24  -61484  105167
  -5   2  24   93006  107798
  -4   2  24  171056  111772
  -3   2  24  131376  110730
  -2   2  24     -74  119393
  -1   2  24  229630  134002
 -10   3  24   76545  117957
  -9   3  24  306296  114081
  -8   3  24  232596  109254
  -7   3  24  462912  108153
  -6   3  24   53110  105229
  -5   3  24  423006  111482
  -4   3  24  211814  110070
  -3   3  24  256137  118173
  -2   3  24   45038  120363
  -1   3  24   74426  134409
 -10   4  24  -60978  158992
  -9   4  24  198270  155570
  -8   4  24 -108216  108216
  -7   4  24   11080  105150
  -6   4  24   14141  104339
  -5   4  24  145620  110788
  -4   4  24   46893  108226
  -3   4  24  400386  120486
  -2   4  24   73173  228426
  -1   4  24  308088  134677
 -10   5  24   56727  125781
  -9   5  24  271742  118567
  -8   5  24  135035  218966
  -7   5  24  555482  171369
  -6   5  24  -80275  105893
  -5   5  24  434014  117389
  -4   5  24  -74091  108722
  -3   5  24  120450  141985
  -2   5  24  171367  131906
  -1   5  24  206594  174690
 -10   6  24  146669  133030
  -9   6  24   93509  121429
  -8   6  24   83952  146213
  -7   6  24   78035  146816
  -6   6  24   32270  112764
  -5   6  24  184403  115400
  -4   6  24   80646  113330
  -3   6  24  254260  268576
  -2   6  24  -18564  171369
  -1   6  24 -182539  182539
   0   6  24 -149532  170464
  -9   7  24   83079  155268
  -8   7  24  282362  119816
  -7   7  24   91743  118923
  -6   7  24  376788  123168
  -5   7  24  262525  117192
  -4   7  24  104965  123409
  -3   7  24   22858  128939
  -2   7  24  202080  136342
   0   7  24  187700  186565
  -9   8  24    5936  283167
  -8   8  24   73370  237181
  -7   8  24 -128301  128301
  -6   8  24   22250  245533
  -5   8  24  -49729  121421
  -4   8  24  459918  219167
  -3   8  24  -18258  162213
  -2   8  24  350009  193909
  -1   8  24    7230  159998
   0   8  24  368115  179520
  -9   9  24  110433  136181
  -8   9  24  510333  135061
  -7   9  24 -124834  124834
  -6   9  24  262823  125131
  -5   9  24  100554  270487
  -4   9  24  252362  131996
  -3   9  24   39470  140578
  -1   9  24   55752  167444
   0   9  24  206639  187369
  -8  10  24 -132476  132476
  -7  10  24  -33472  132381
  -6  10  24 -131591  131591
  -5  10  24  114717  137061
  -4  10  24  221145  248954
  -3  10  24  144298  202464
  -1  10  24  224101  170867
   0  10  24  -49710  179520
  -8  11  24   70165  142806
  -7  11  24  159877  190388
  -6  11  24  174408  144115
  -5  11  24  342381  142450
  -4  11  24   27994  199243
  -1  11  24 -165231  165231
  -7  12  24   82229  182136
  -6  12  24  111114  160140
  -5  12  24 -196829  196829
  -9   0  25   37711  176904
  -7   0  25  110845  164225
  -5   0  25  295114  177306
  -3   0  25  548234  194816
  -9   1  25  311115  141382
  -8   1  25   42392  189582
  -7   1  25  324589  121222
  -6   1  25  222099  151243
  -5   1  25  -63953  122380
  -4   1  25   35580  126005
  -3   1  25   60829  138891
  -2   1  25 -129131  130286
  -9   2  25   60140  126601
  -8   2  25   -7154  120519
  -7   2  25  104813  176703
  -6   2  25   48144  119578
  -5   2  25  182338  159796
  -4   2  25  165726  128363
  -3   2  25  -53788  133869
  -9   3  25  110999  130418
  -8   3  25  340513  127386
  -7   3  25   60808  120161
  -6   3  25  187448  195821
  -5   3  25  173616  142489
  -4   3  25  -17871  179419
  -3   3  25  -34547  148728
  -9   4  25  115199  360248
  -8   4  25   35727  128421
  -7   4  25  -59495  123013
  -6   4  25  118890  124373
  -5   4  25  -21614  189281
  -4   4  25  300101  181231
  -3   4  25   95441  132558
  -9   5  25  -23353  130659
  -8   5  25  320487  131043
  -7   5  25  117430  125790
  -6   5  25  199083  124729
  -5   5  25  113085  132506
  -4   5  25  161010  138559
  -3   5  25   41694  128120
  -8   6  25   18180  131955
  -7   6  25 -128344  128344
  -6   6  25  107595  191897
  -5   6  25  187561  134457
  -4   6  25  139519  195118
  -3   6  25  243007  209910
  -8   7  25  -64766  138343
  -7   7  25  565068  259217
  -6   7  25  148021  135633
  -5   7  25  178344  255695
  -4   7  25 -219267  317482
  -8   8  25  121682  148118
  -7   8  25   82405  143520
  -6   8  25   -6850  311544
  -5   8  25  300702  144154
  -4   8  25  146672  222588
  -7   9  25  161804  147643
  -6   9  25  -81521  259116
  -6  10  25 -137256  196627
  -8   0  26   56146  194010
  -6   0  26  -70036  194615
  -8   1  26  241434  204879
  -7   1  26  -82223  134981
  -6   1  26  -44476  138034
  -5   1  26   41445  145582
  -8   2  26  181560  216552
  -7   2  26  164035  144669
  -6   2  26   75290  174690
  -5   2  26  -76665  204376
  -7   3  26  155690  140209
  -6   3  26 -119217  141397
  -5   3  26  161450  143781
  -7   4  26  118976  143347
  -6   4  26  -69825  144371
  -5   4  26  204381  146081
  -7   5  26  166570  152020
  -6   5  26   74198  183243
  -6   6  26 -210714  210714

;
_shelx_hkl_checksum   12850
