# Supplementary material
Source: MDPI journal article supplement (https://www.mdpi.com/2304-6740/9/10/74)
Supplement: s1 [file s1 › inorganics-1337508-supplementary - for proofreading.pdf]

# SUPPLEMENTARY MATERIAL

## Diverse Coordination Numbers and Geometries in Pyridyl Adducts of Lanthanide(III) Complexes Based on $\beta$ -Diketonate

Franz A. Mautner <sup>1,\*</sup>, Florian Bierbaumer <sup>1</sup>, Roland C. Fischer <sup>2,\*</sup>, Ana Torvisco <sup>2</sup>, Ramon Vicente <sup>3</sup>, Mercè Font-Bardía <sup>4</sup>, Ànnia Tubau <sup>3</sup>, Saskia Speed <sup>3</sup> and Salah S. Massoud <sup>5,6,\*</sup>

- 1 Institut für Physikalische and Theoretische Chemie, Technische Universität Graz, A-8010 Graz, Austria
- 2 Institut für Anorganische Chemie, Technische Universität Graz, Stremayrgasse 9/V, A-8010 Graz, Austria
- 3 Departament de Química Inorgànica i Orgànica, Universitat de Barcelona, Martí i Franquès 1-11, E-31321 Barcelona, Spain
- 4 Departament de Mineralogia, Cristallografia i Dipòsits Minerals and Unitat de Difracció de R-X. Centre Científic i Tecnològic de la Universitat de Barcelona (CCiTUB), Universitat de Barcelona. Solé i Sabarís 1-3. 08028 Barcelona, Spain
- 5 Department of Chemistry, University of Louisiana at Lafayette, P.O. Box 43700, Lafayette, LA 70504, USA
- 6 Department of Chemistry, Faculty of Sciences, Alexandria University, Moharam Bey 21511, Alexandria, Egypt
- \* Correspondence: Correspondence: [mautner@tugraz.at](mailto:mautner@tugraz.at) (F.A.M.); [roland.fischer@tugraz.at](mailto:roland.fischer@tugraz.at) (RCF); [ssmassoud@louisiana.edu](mailto:ssmassoud@louisiana.edu) (S.S.M.); Tel.: +43-316-873-32270 (F.A.M.); +1-337-482-5672 (S.S.M.); Fax: +43-316-873-8225 (F.A.M.); +1-337-482-5672 (S.S.M.)

| Contents                                                                                      | page No. |
|-----------------------------------------------------------------------------------------------|----------|
| Figures S1-S10: X-ray powder pattern of <b>1–10</b> .....                                     | 2        |
| Figures S11-S20: Packing plots of <b>1–10</b> .....                                           | 6        |
| Table S1: Selected bond distances (Å) and bond angles (°) of <b>1–10</b> . ....               | 11       |
| Tables S2-S11: Non-coordinative interactions in <b>1–10</b> .....                             | 12       |
| Table S12: Crystallographic data and processing parameters of <b>1–10</b> .....               | 30       |
| Figure S21: Emission spectrum of <b>10</b> measured at the 464 nm excitation wavelength. .... | 34       |

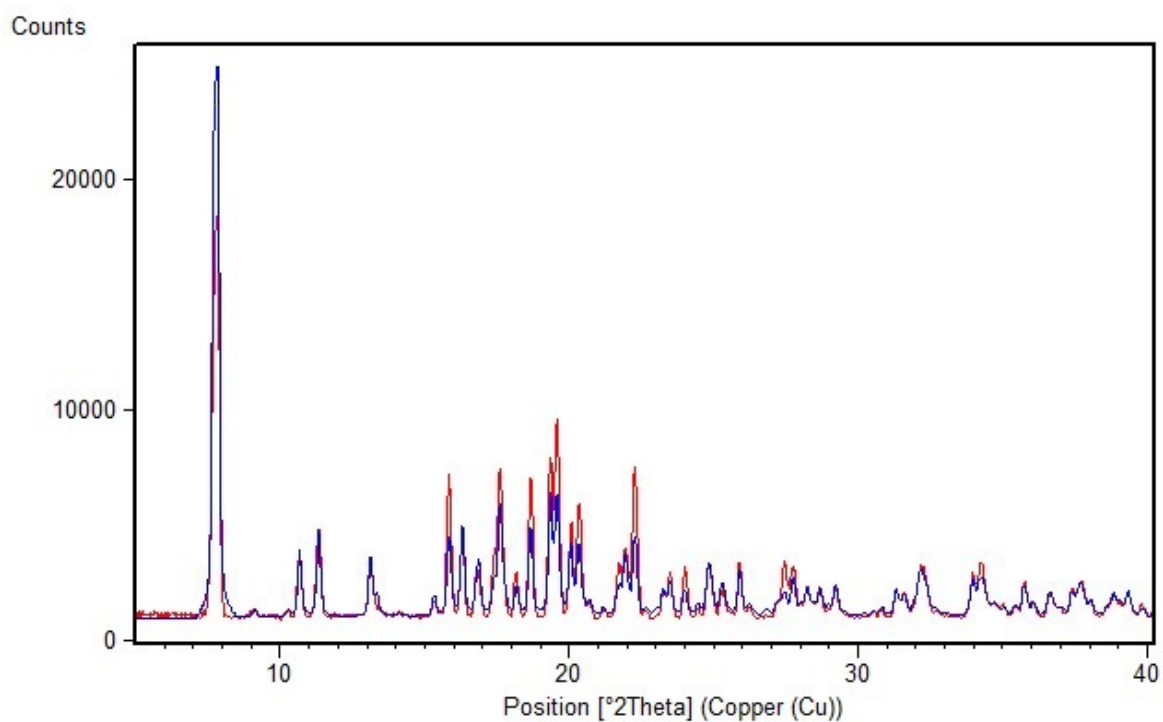

**Figure S1:** X-ray powder pattern of **1** (red: observed, blue: simulated).

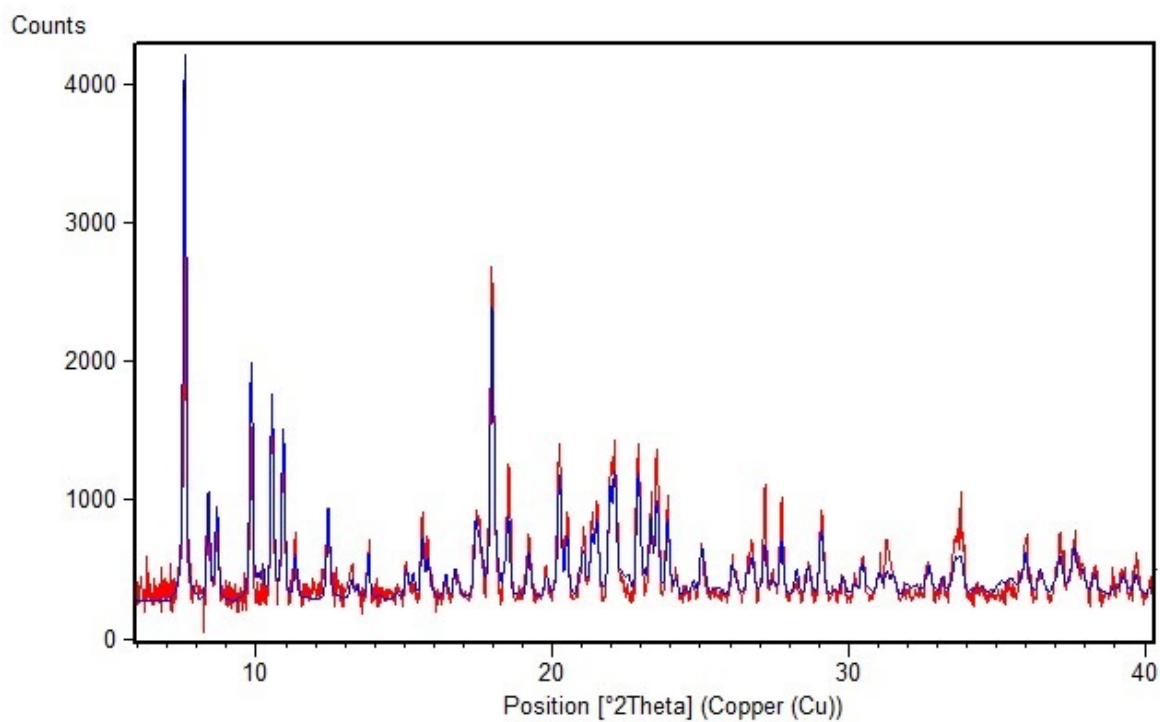

**Figure S2:** X-ray powder pattern of **2**. (red: observed, blue: simulated).

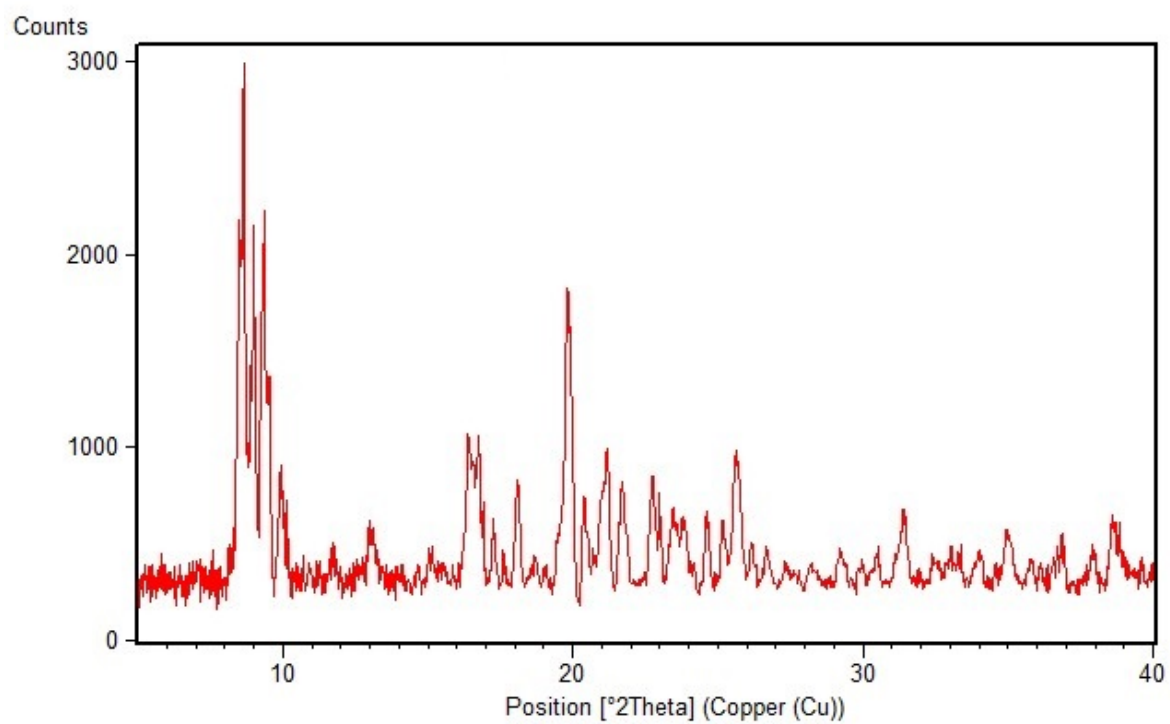

**Figure S3:** X-ray powder pattern of **3**.

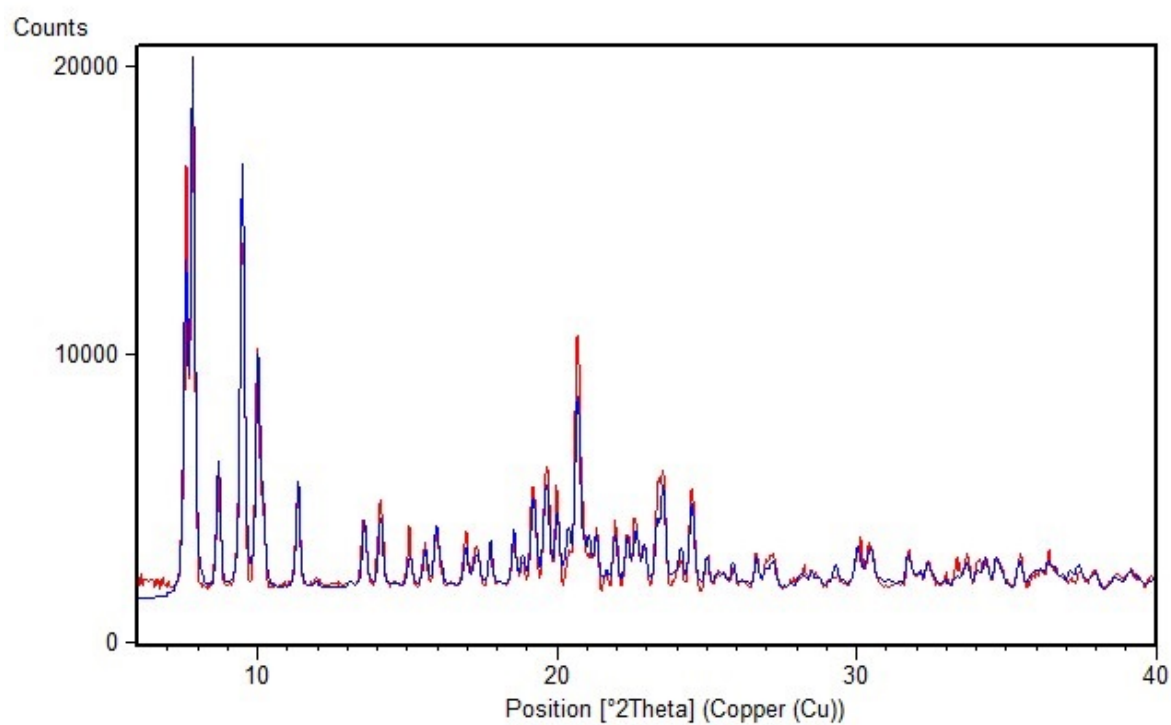

**Figure S4:** X-ray powder pattern of **4**. (red: observed, blue: simulated).

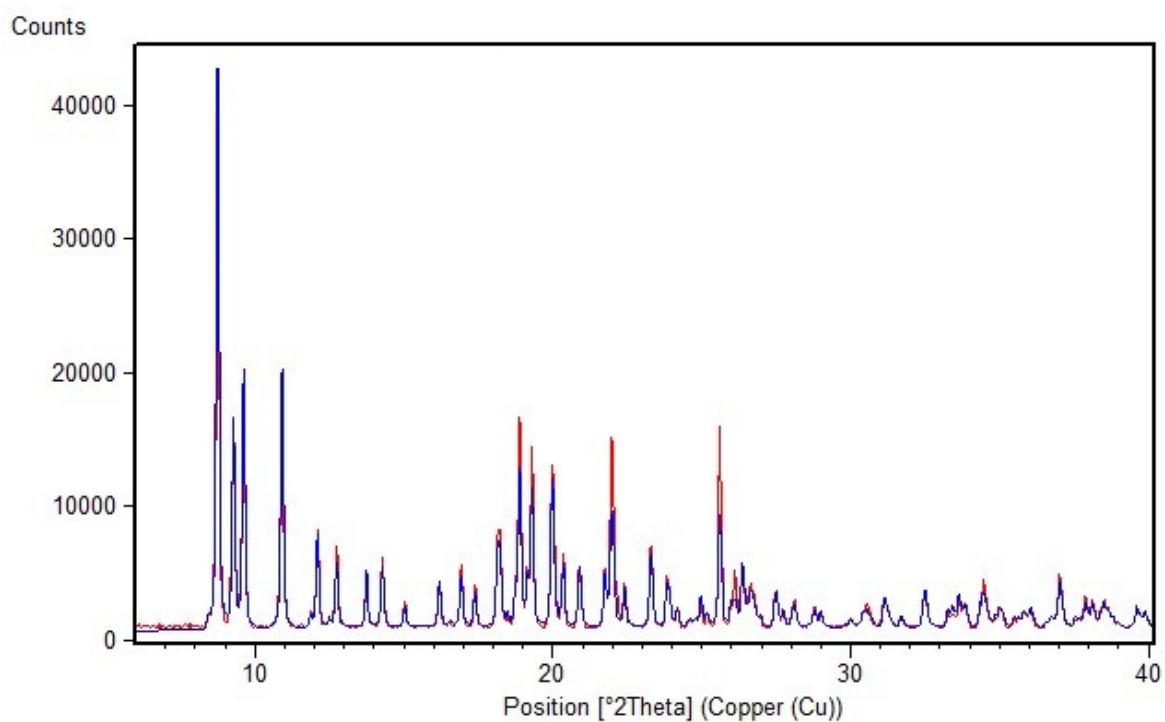

**Figure S5:** X-ray powder pattern of **5**. (red: observed, blue: simulated).

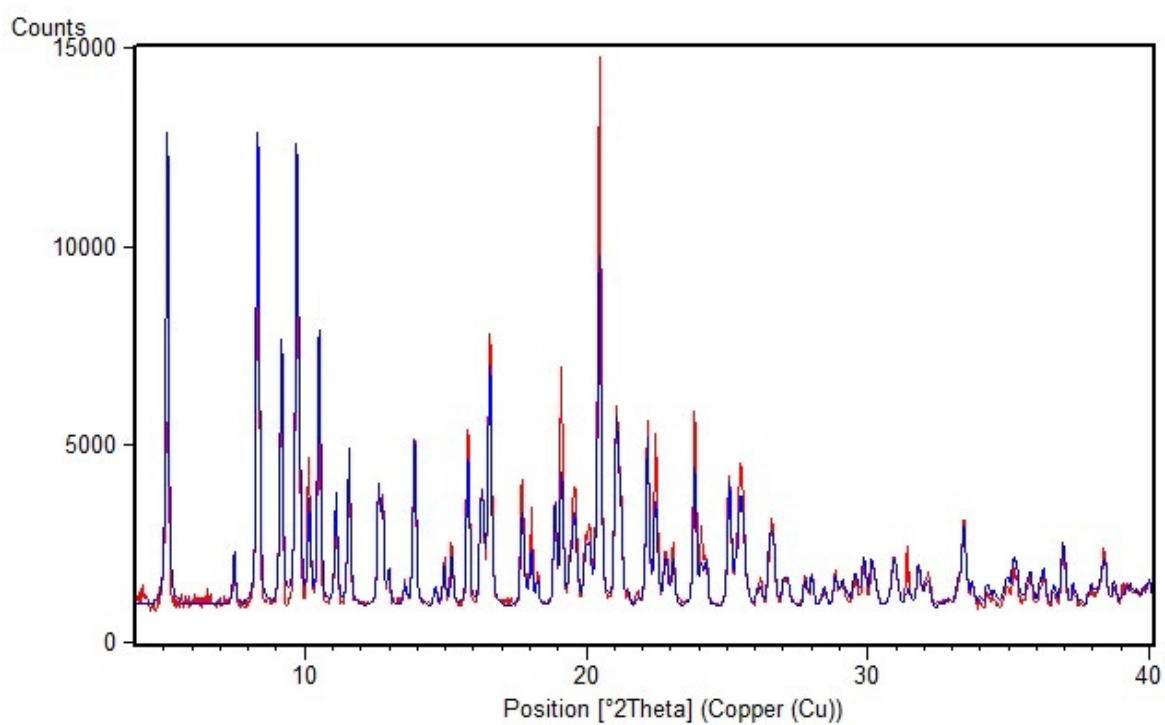

**Figure S6:** X-ray powder pattern of **6**. (red: observed, blue: simulated).

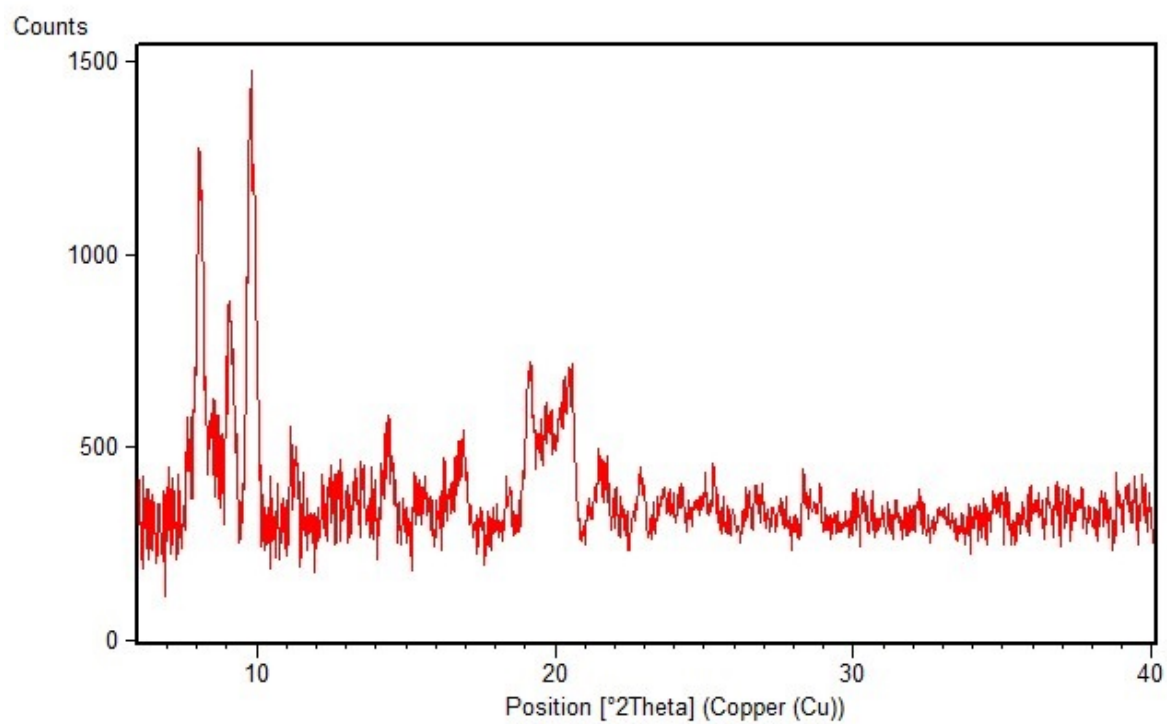

**Figure S7:** X-ray powder pattern of **7**.

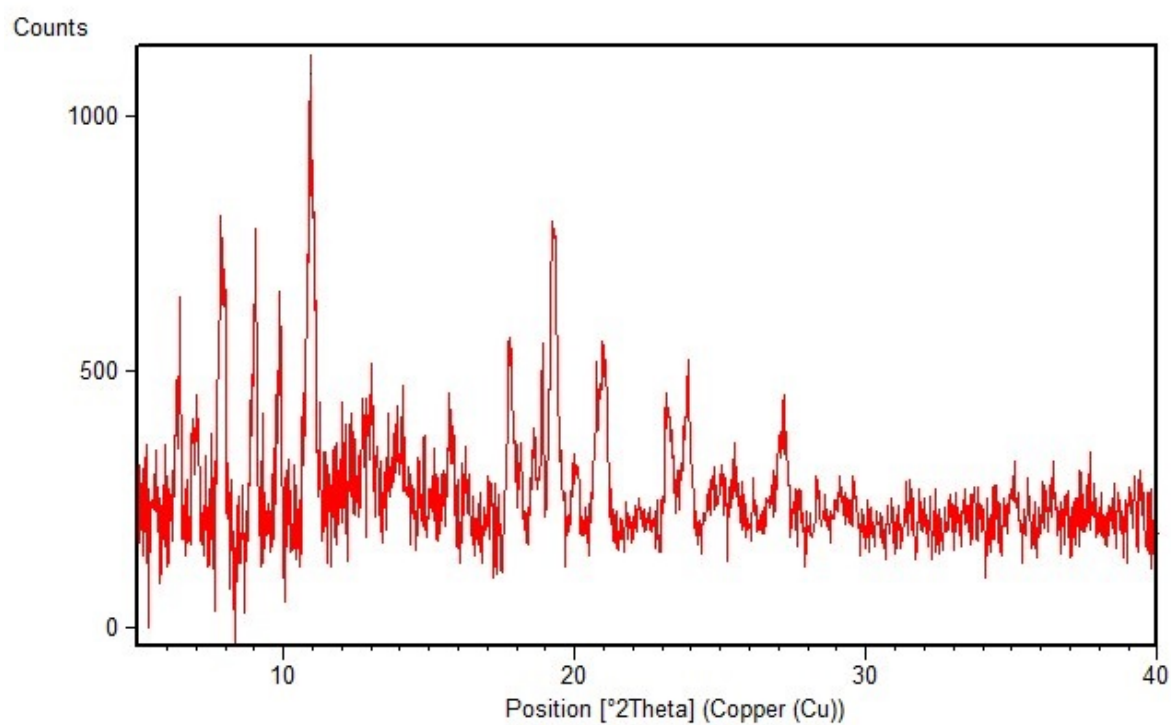

**Figure S8:** X-ray powder pattern of **8**.

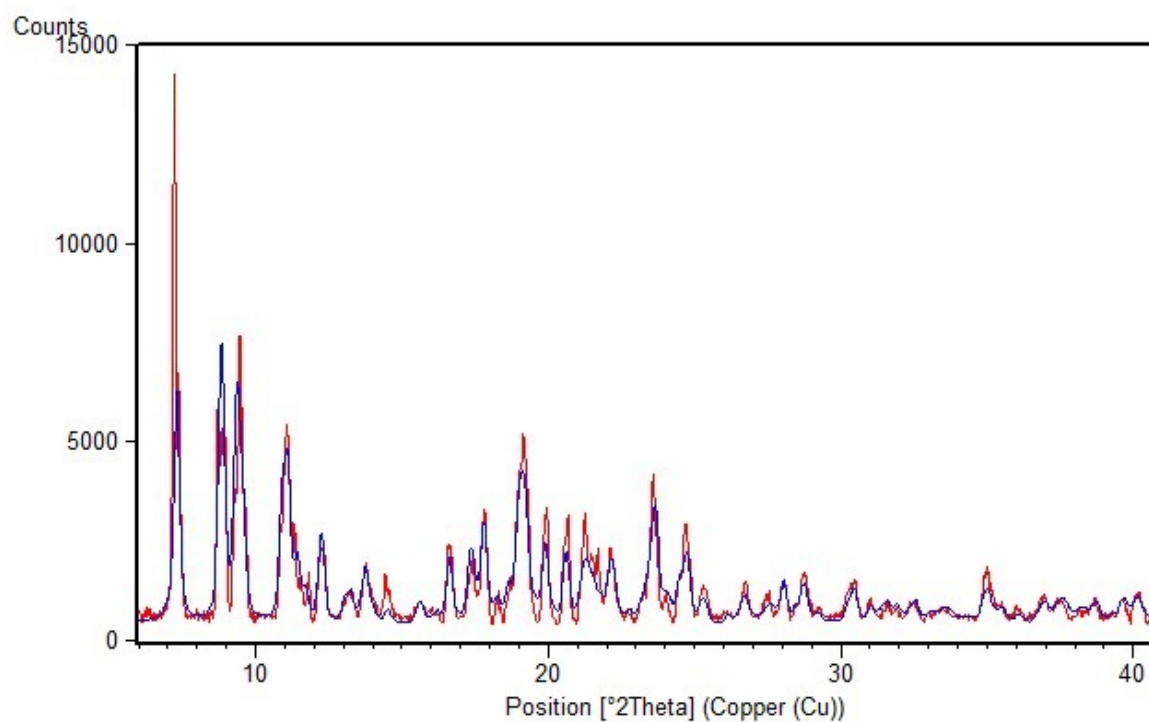

**Figure S9:** X-ray powder pattern of **9**. (red: observed, blue: simulated).

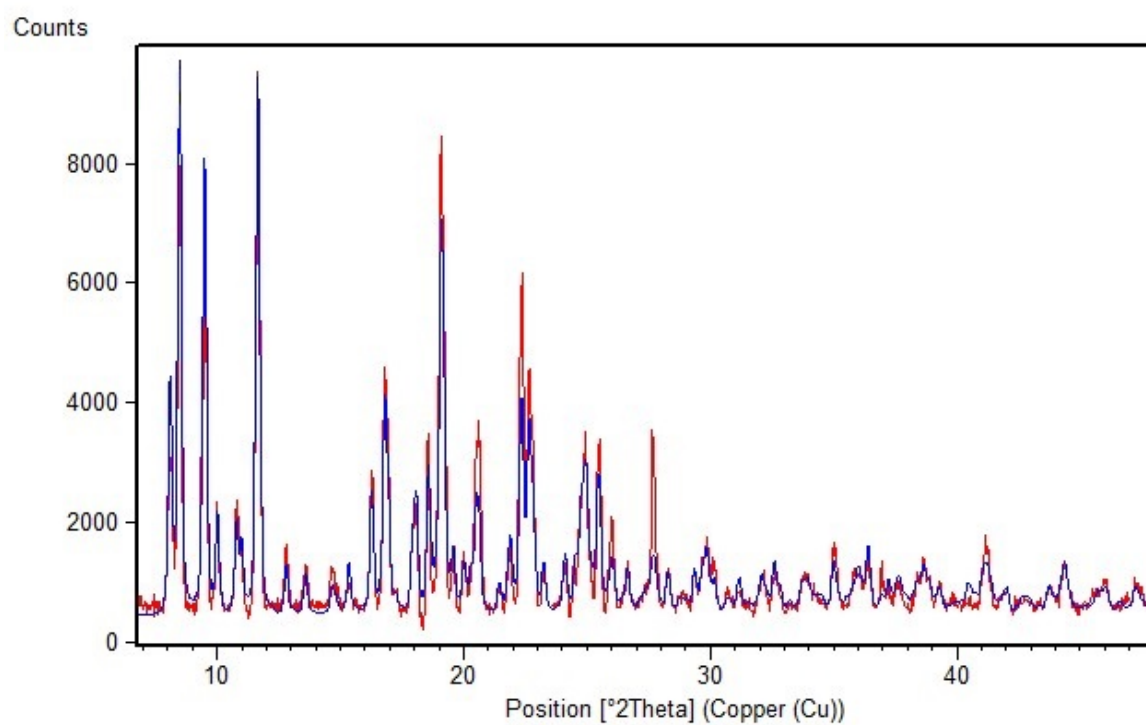

**Figure S10:** X-ray powder pattern of **10**. (red: observed, blue: simulated).

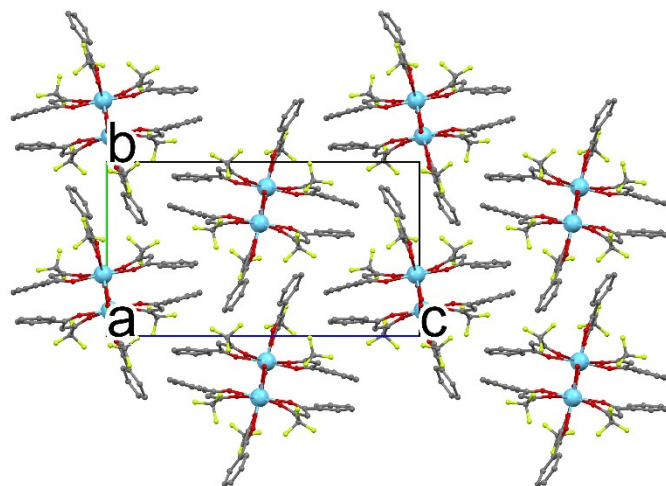

**Figure S11:** Packing plot of 1.

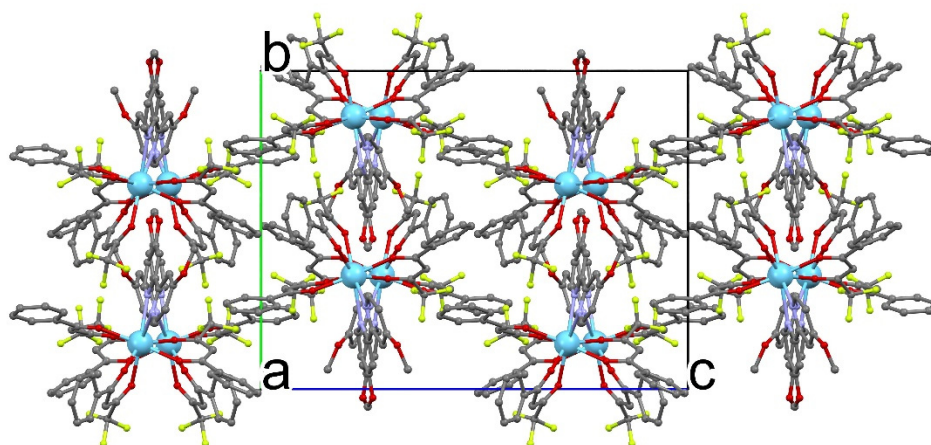

**Figure S12:** Packing plot of 2.

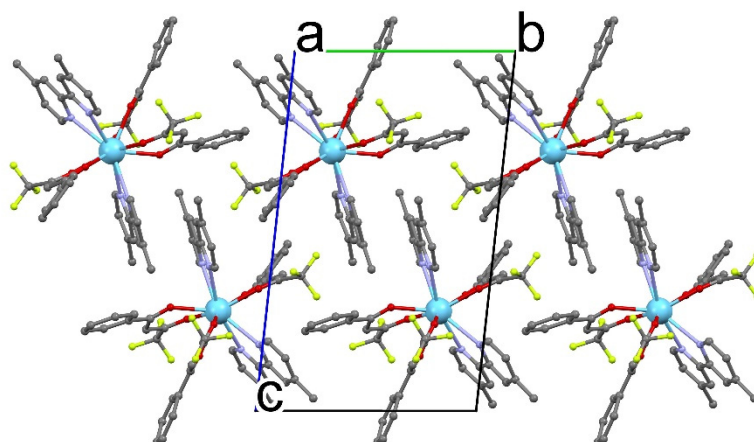

**Figure S13:** Packing plot of 3.

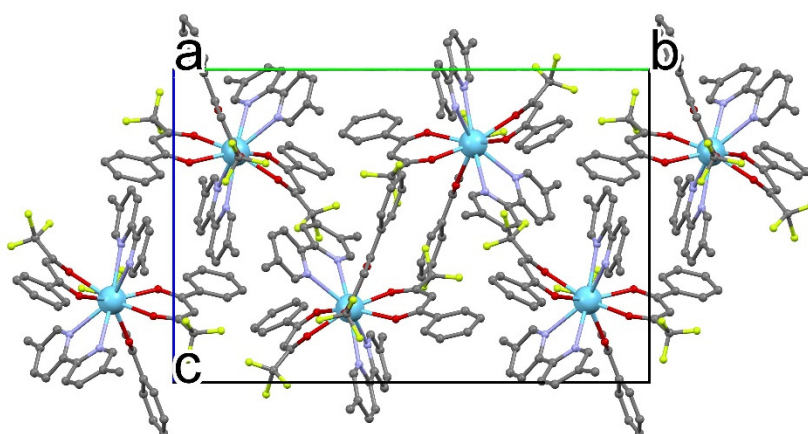

**Figure S14:** Packing plot of **4**.

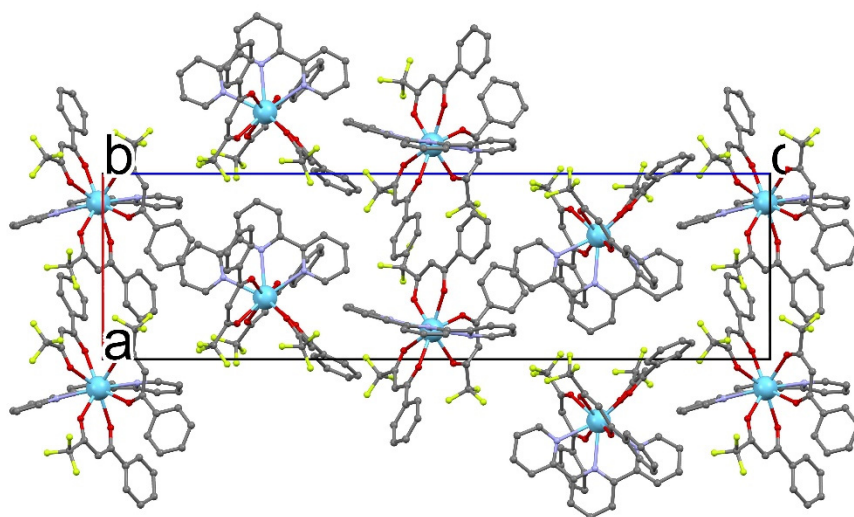

**Figure S15:** Packing plot of **5**.

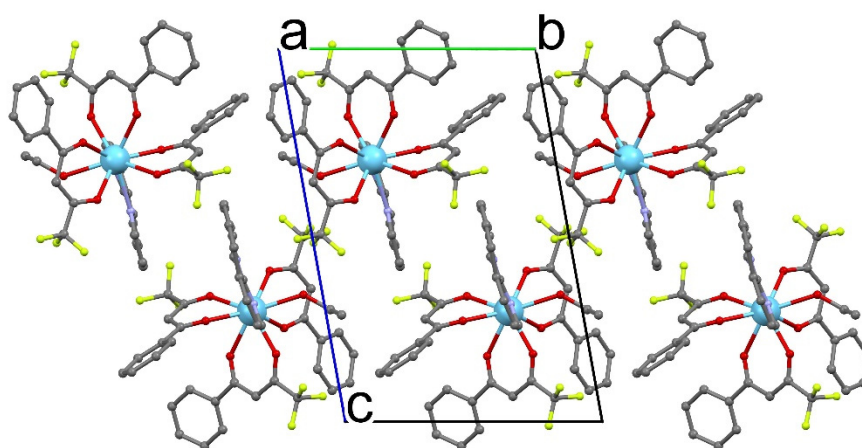

**Figure S16:** Packing plot of **6**.

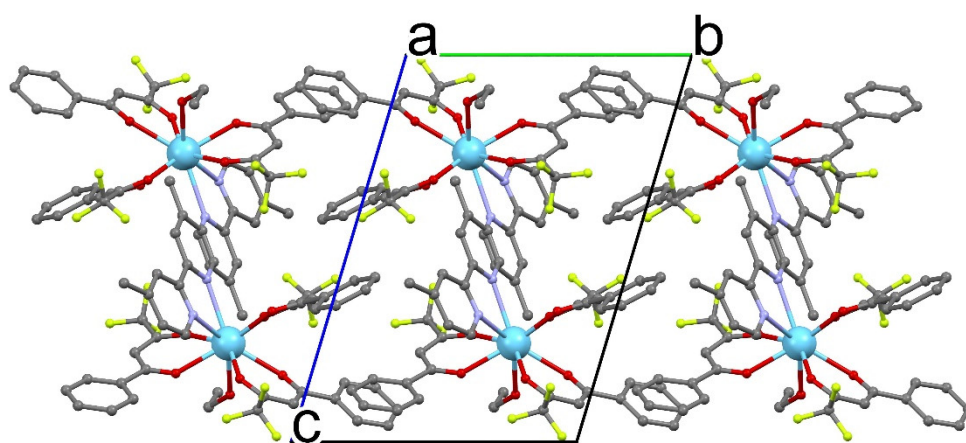

**Figure S17:** Packing plot of **7**.

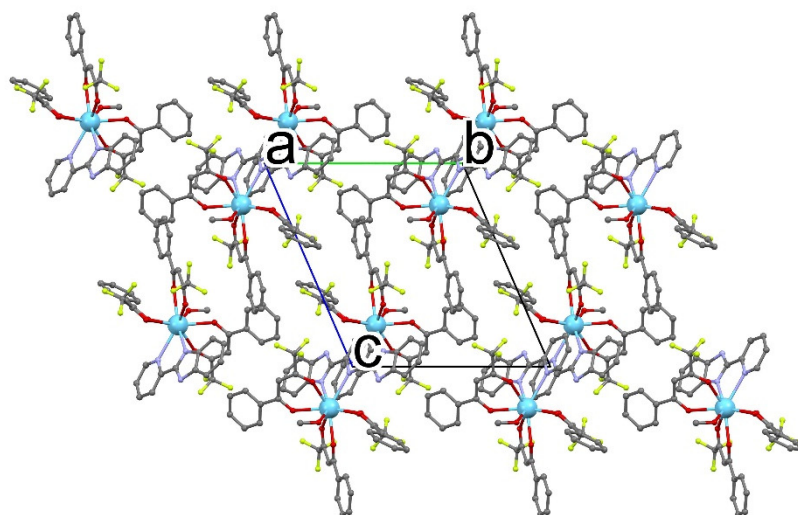

**Figure S18:** Packing plot of **8**.

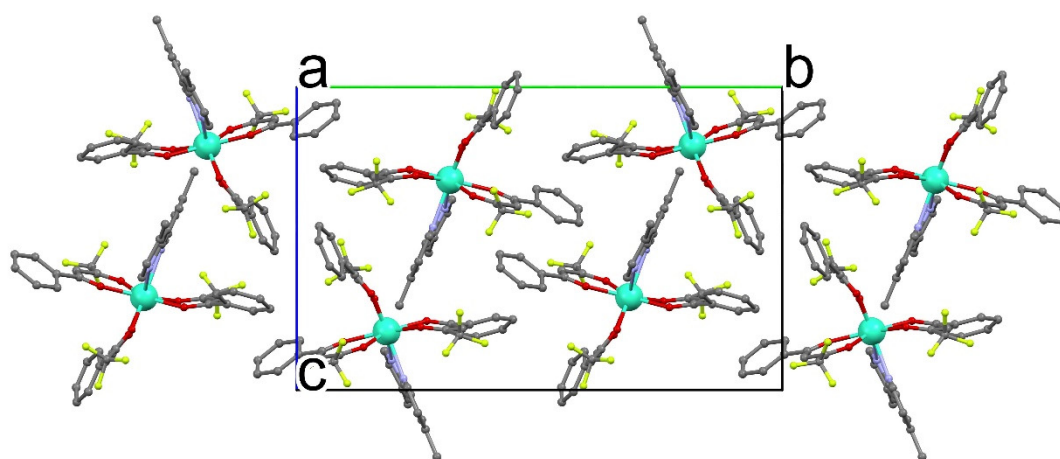

**Figure S19:** Packing plot of **9**.

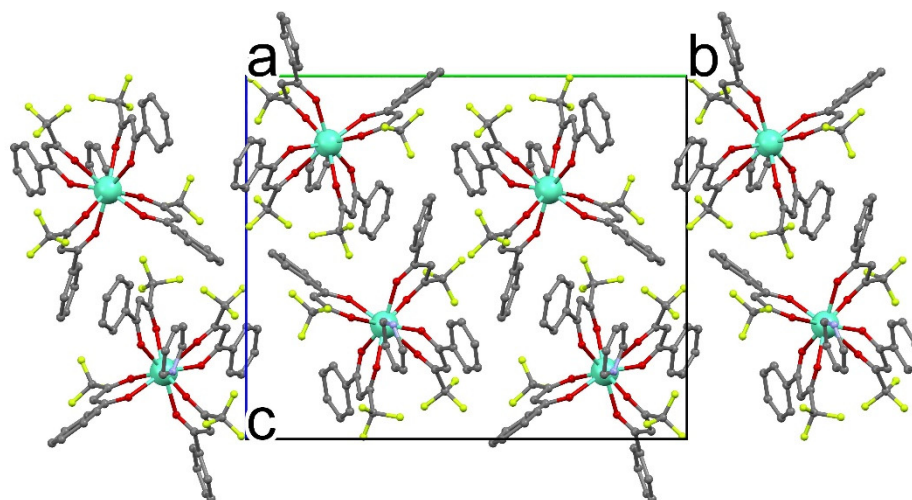

**Figure S20:** Packing plot of **10**.

**Table S1:** Selected bond distances (Å) and bond angles (°) of **1 – 10**.

**Compound 1:**

La1-O1 2.486(3), La1-O2 2.445(3), La1-O3 2.488(2), La1-O4 2.444(3), La1-O5 2.540(2), La1-O6 2.407(3), La1-O7 2.564(3), La1-O8 2.517(2); O1-La1-O2 68.64(9), O3-La1-O4 68.68(9), O5-La1-O6 68.43(8), O7-La1-O8 66.08(9).

**Compound 2:**

La1-O1 2.4642(12), La1-O2 2.4549(12), La1-O3 2.4688(13), La1-O4 2.4824(12), La1-O5 2.4623(12), La1-O6 2.4859(12), La1-N1 2.6687(15), La1-N2 2.6690(14); O1-La1-O2 69.08(4), O3-La1-O4 69.26(4), O5-La1-O6 68.68(4), N1-La1-N2 59.86(4).

**Compound 3:**

La1-O1 2.5073(14), La1-O2 2.5045(15), La1-O3 2.4911(14), La1-O4 2.5298(14), La1-O5 2.5115(14), La1-O6 2.5732(15), La1-N1 2.8299(17), La1-N2 2.8091(16), La1-N3 2.8434(18), La1-N4 2.8637(18); O1-La1-O2 67.64(5), O3-La1-O4 67.95(5), O5-La1-O6 67.46(5), N1-La1-N2 57.08(5), N3-La1-N4 55.86(5).

**Compound 4:**

La1-O1 2.5121(15), La1-O2 2.5115(16), La1-O3 2.5254(16), La1-O4 2.5733(15), La1-O5 2.5173(15), La1-O6 2.5659(15), La1-N1 2.751(2), La1-N2 2.8216(18), La1-N3 2.8010(19), La1-N4 2.804(2); O1-La1-O2 68.32(5), O3-La1-O4 65.96(5), O5-La1-O6 66.07(5), N1-La1-N2 58.38(6), N3-La1-N4 57.03(6).

**Compound 5:**

La1-O1 2.480(2), La1-O2 2.481(3), La1-O3 2.555(3), La1-O4 2.514(2), La1-O5 2.453 (3), La1-O6 2.495(2), La1-N1 2.709(3), La1-N2 2.744(3), La1-N3 2.705(3); O1-La1-O2 69.66(8), O3-La1-O4 71.56(9), O5-La1-O6 69.40(8), N1-La1-N2 61.01(9), N2-La1-N3 59.83(9).

**Compound 6:**

La1-O1 2.4588(17), La1-O2 2.5221(16), La1-O3 2.5090(16), La1-O4 2.4788(17), La1-O5 2.5107(18), La1-O6 2.5143(15), La1-O7 2.6229(17), La1-N1 2.7736(18), La1-N2 2.742(2); O1-La1-O2 69.05(5), O3-La1-O4 68.55(5), O5-La1-O6 66.93(5), N1-La1-N2 59.74(6).

**Compound 7:**

La1-O1 2.4891(16), La1-O2 2.5030(16), La1-O3 2.4799(16), La1-O4 2.4889(17), La1-O5 2.4790(10), La1-O6 2.5658(18), La1-O7 2.623(2), La1-N1 2.755(2), La1-N2 2.735(2); O1-La1-O2 67.74(5), O3-La1-O4 70.60(6), O5-La1-O6 67.49(6), N1-La1-N2 58.53(6).

**Compound 8:**

La1-O1 2.485(2), La1-O2 2.533(2), La1-O3 2.581(2), La1-O4 2.478(2), La1-O5 2.498(2), La1-O6 2.481(2), La1-O7 2.668(2), La1-N1 2.745(3), La1-N2 2.658(3); O1-La1-O2 67.35(7), O3-La1-O4 67.18(6), O5-La1-O6 67.85(7), N1-La1-N2 61.40(7).

**Compound 9:**

Tb1-O1 2.354(3), Tb1-O2 2.340(3), Tb1-O3 2.370(3), Tb1-O4 2.317(3), Tb1-O5 2.366(3), Tb1-O6 2.317(3), Tb1-N1 2.547(3), Tb1-N2 2.530(3); O1-Tb1-O2 71.47(10), O3-Tb1-O4 71.33(10), O5-Tb1-O6 72.12(10), N1-Tb1-N2 63.08(10).

**Compound 10:**

Eu1-O1 2.381(6), Eu1-O2 2.403(5), Eu1-O3 2.451(5), Eu1-O4 2.346(6), Eu1-O5 2.362(6), Eu1-O6 2.364(5), Eu1-O7 2.388(6), Eu1-O8 2.361(6); O1-Eu1-O2 72.14(19), O3-Eu1-O4 70.81(18), O5-Eu1-O6 73.0(2), O7-Eu1-O8 72.1(2).

**Table S2:** Non-coordinative interactions in **1**.

6-Membered Ring (1) C5 --> C6 --> C7 --> C8 --> C9 --> C10 -->  
 6-Membered Ring (2) C15 --> C16 --> C17 --> C18 --> C19 --> C20 -->  
 6-Membered Ring (3) C25 --> C26 --> C27 --> C28 --> C29 --> C30 -->

**Short Ring-Interactions with Cg-Cg Distances < 6.0 Ang., Alpha < 20.0 Deg. and Beta < 60.0 Deg.**

- Cg(I) = Plane number I (= ring number in () above)
- Alpha = Dihedral Angle between Planes I and J (Deg)
- Beta = Angle Cg(I)-->Cg(J) or Cg(I)-->Me vector and normal to plane I (Deg)
- Gamma = Angle Cg(I)-->Cg(J) vector and normal to plane J (Deg)
- Cg-Cg = Distance between ring Centroids (Ang.)
- CgI\_Perp = Perpendicular distance of Cg(I) on ring J (Ang.)
- CgJ\_Perp = Perpendicular distance of Cg(J) on ring I (Ang.)

| Cg(I) | Cg(J) | [ARU(J)] | Cg-Cg    | Alpha   | Beta | Gamma | CgI_Perp   | CgJ_Perp   |
|-------|-------|----------|----------|---------|------|-------|------------|------------|
| Cg1   | Cg2   | [2665]   | 4.737(3) | 19.8(3) | 39.4 | 30.2  | 4.0945(19) | 3.663(2)   |
| Cg1   | Cg2   | [3466]   | 5.705(3) | 14.7(3) | 57.5 | 63.0  | 2.5897(19) | 3.069(2)   |
| Cg1   | Cg3   | [3556]   | 5.434(3) | 62.1(2) | 35.8 | 82.2  | 0.7342(19) | 4.4085(18) |
| Cg2   | Cg1   | [2664]   | 4.737(3) | 19.8(3) | 30.2 | 39.4  | 3.663(2)   | 4.0945(19) |
| Cg3   | Cg1   | [2664]   | 5.294(3) | 54.3(2) | 35.9 | 65.1  | 2.2308(18) | 4.2907(19) |
| Cg3   | Cg2   | [4645]   | 5.419(3) | 42.4(3) | 42.6 | 79.3  | 1.0060(18) | 3.990(2)   |

|        |                  |
|--------|------------------|
| [2665] | 3/2-X,1-Y,1/2+Z  |
| [3466] | -1/2+X,3/2-Y,1-Z |
| [3556] | 1/2+X,1/2-Y,1-Z  |
| [2664] | 3/2-X,1-Y,-1/2+Z |
| [4645] | 1-X,-1/2+Y,1/2-Z |

**Analysis of X-H...Cg(Pi-Ring) Interactions (H...Cg < 4.0 Ang. - Gamma < 30.0 Deg)**

| Y--X(I) | Cg(J) | [ARU(J)] | X..Cg    | X-Perp | Gamma | Y-X..Cg  | Y..Cg    | Y-X,Pi |
|---------|-------|----------|----------|--------|-------|----------|----------|--------|
| C11-F6  | Cg1   | [3466]   | 3.769(4) | 3.743  | 6.82  | 99.8(2)  | 4.203(4) | 3.62   |
| C21-F8  | Cg3   | [3556]   | 3.428(4) | 3.351  | 12.18 | 105.0(2) | 3.979(5) | 25.69  |
| C21-F9  | Cg3   | [3556]   | 3.859(4) | 3.598  | 21.20 | 85.3(3)  | 3.979(5) | 14.09  |

|        |                  |
|--------|------------------|
| [3466] | -1/2+X,3/2-Y,1-Z |
| [3556] | 1/2+X,1/2-Y,1-Z  |

The Cg(I) refer to the Ring Centre-of-Gravity numbers given in () in the Ring-Analysis above.

| Cg(I) | x           | y            | z          |
|-------|-------------|--------------|------------|
| Cg1   | 0.8488(2)   | 0.58920(15)  | 0.72723(8) |
| Cg2   | 0.87570(18) | 0.71947(18)  | 0.25780(8) |
| Cg3   | 0.46492(18) | 0.273227(14) | 0.41246(9) |

**Table S3: Non-coordinative interactions in 2.**

6-Membered Ring (1) N1 --> C31 --> C32 --> C33 --> C34 --> C35 -->  
 6-Membered Ring (2) N2 --> C36 --> C37 --> C38 --> C39 --> C40 -->  
 6-Membered Ring (3) C5 --> C6 --> C7 --> C8 --> C9 --> C10 -->  
 6-Membered Ring (4) C15 --> C16 --> C17 --> C18 --> C19 --> C20 -->  
 6-Membered Ring (5) C25 --> C26 --> C27 --> C28 --> C29 --> C30 -->

**Short Ring-Interactions with Cg-Cg Distances < 6.0 Ang., Alpha < 20.0 Deg. and Beta < 60.0 Deg.**

- Cg(I) = Plane number I (= ring number in () above)
- Alpha = Dihedral Angle between Planes I and J (Deg)
- Beta = Angle Cg(I)-->Cg(J) or Cg(I)-->Me vector and normal to plane I (Deg)
- Gamma = Angle Cg(I)-->Cg(J) vector and normal to plane J (Deg)
- Cg-Cg = Distance between ring Centroids (Ang.)
- CgI\_Perp = Perpendicular distance of Cg(I) on ring J (Ang.)
- CgJ\_Perp = Perpendicular distance of Cg(J) on ring I (Ang.)

| Cg(I) | Cg(J) | [ARU(J)] | Cg-Cg      | Alpha    | Beta      | Gamma | CgI_Perp | CgJ_Perp  | Slippage  |
|-------|-------|----------|------------|----------|-----------|-------|----------|-----------|-----------|
| Cg1   | Cg4   | [7655]   | 3,9547(11) | 3,3055   | 16,40(9)  | 19,1  | 34       | 3,2774(7) | 3,7379(8) |
| Cg1   | Cg5   | [7655]   | 5,3385(11) | 21,6968  | 75,39(9)  | 50,5  | 45,5     | 3,7407(7) | 3,3968(8) |
| Cg2   | Cg3   | [8565]   | 4,9097(10) | -16,8341 | 67,05(9)  | 15    | 82       | 0,6841(7) | 4,7435(8) |
| Cg2   | Cg5   | [1555]   | 5,9840(11) | 19,7705  | 86,97(9)  | 32,6  | 64,9     | 2,5341(7) | 5,0405(8) |
| Cg3   | Cg4   | [1555]   | 5,6589(12) | 19,3295  | 75,23(10) | 28,5  | 47       | 3,8577(8) | 4,9711(9) |
| Cg3   | Cg4   | [7655]   | 5,6048(12) | 3,3055   | 88,15(10) | 31,6  | 56,7     | 3,0804(8) | 4,7718(9) |
| Cg3   | Cg5   | [2664]   | 4,6103(12) | -5,8977  | 37,92(10) | 35,5  | 36,4     | 3,7106(9) | 3,7522(8) |
| Cg3   | Cg5   | [8564]   | 4,3550(12) | -7,824   | 26,00(10) | 28,1  | 21,6     | 4,0481(9) | 3,8404(8) |
| Cg4   | Cg1   | [7645]   | 3,9547(11) | 18,8969  | 16,40(9)  | 34    | 19,1     | 3,7379(8) | 3,2774(7) |
| Cg4   | Cg3   | [1555]   | 5,6589(12) | 7,4051   | 75,23(10) | 47    | 28,5     | 4,9710(9) | 3,8576(8) |
| Cg4   | Cg3   | [7645]   | 5,6050(12) | 8,5858   | 88,15(10) | 56,7  | 31,6     | 4,7719(9) | 3,0804(8) |
| Cg4   | Cg5   | [2664]   | 4,9613(12) | -5,8977  | 67,13(10) | 18,1  | 79       | 0,9465(9) | 4,7160(8) |
| Cg5   | Cg1   | [7645]   | 5,3387(11) | 18,8969  | 75,39(9)  | 45,5  | 50,5     | 3,3968(8) | 3,7408(7) |
| Cg5   | Cg2   | [7645]   | 5,9995(11) | 18,4006  | 81,32(9)  | 21,7  | 61       | 2,9044(8) | 5,5734(7) |
| Cg5   | Cg3   | [2665]   | 4,6103(12) | 0,6406   | 37,92(10) | 36,4  | 35,5     | 3,7522(8) | 3,7106(9) |
| Cg5   | Cg3   | [8565]   | 4,3550(12) | -16,8341 | 26,00(10) | 21,6  | 28,1     | 3,8404(8) | 4,0481(9) |

|        |                  |        |                 |
|--------|------------------|--------|-----------------|
| [7655] | 3/2-X,1/2+Y,Z    | [8564] | X,3/2-Y,-1/2+Z  |
| [8565] | X,3/2-Y,1/2+Z    | [7645] | 3/2-X,-1/2+Y,Z  |
| [1555] | X,Y,Z            | [2665] | 3/2-X,1-Y,1/2+Z |
| [2664] | 3/2-X,1-Y,-1/2+Z |        |                 |

**Analysis of X-H...Cg(Pi-Ring) Interactions (H..Cg < 3.0 Ang. - Gamma < 40.0 Deg)**

- Cg(J) = Center of gravity of ring J (Plane number above)
- H-Perp = Perpendicular distance of H to ring plane J
- Gamma = Angle between Cg-H vector and ring J normal
- X-H..Cg = X-H-Cg angle (degrees)
- X..Cg = Distance of X to Cg (Angstrom)
- X-H, Pi = Angle of the X-H bond with the Pi-plane (i.e. ' Perpendicular = 90 degrees, Parallel = 0 degrees)

| X--H(I) | Cg(J) | [ARU(J)] | H..Cg | H-Perp | Gamma | X-H..Cg | X..Cg    | X-H,Pi |
|---------|-------|----------|-------|--------|-------|---------|----------|--------|
| C9-H9   | Cg2   | [8564]   | 2,98  | 2,79   | 20,25 | 135     | 3,708(2) | 57     |

|        |                |
|--------|----------------|
| [8564] | X,3/2-Y,-1/2+Z |
|--------|----------------|

**Analysis of Y-X...Cg(Pi-Ring) Interactions (X...Cg < 4.0 Ang. - Gamma < 30.0 Deg)**

| Y--X(I) | Cg(J) | [ARU(J)] | X..Cg      | X-Perp | Gamma | Y-X..Cg    | Y..Cg    | Y-X,Pi |
|---------|-------|----------|------------|--------|-------|------------|----------|--------|
| C21-F8  | Cg1   | [1555]   | 3,7704(15) | 3,574  | 18,55 | 124,48(11) | 4,661(2) | 19,05  |
| C11-F5  | Cg2   | [7645]   | 3,530(19)  | -3,49  | 9,02  | 102,9(9)   | 4,122(2) | 14,7   |

|        |                |
|--------|----------------|
| [1555] | X,Y,Z          |
| [7645] | 3/2-X,-1/2+Y,Z |

The Cg(I) refer to the Ring Centre-of-Gravity numbers given in ( ) in the Ring-Analysis above.

| Cg(I) | x          | y          | z          |
|-------|------------|------------|------------|
| Cg1   | 0,62736(3) | 0,87298(4) | 0,74353(3) |
| Cg2   | 0,81388(3) | 0,78356(4) | 0,76879(3) |
| Cg3   | 0,76795(4) | 0,73570(5) | 0,47842(3) |
| Cg4   | 0,87832(4) | 0,47005(5) | 0,58699(4) |
| Cg5   | 0,79458(4) | 0,51743(5) | 0,93762(3) |

**Table S4:** Non-coordinative interactions in **3**.

6-Membered Ring (1) N1 --> C31 --> C32 --> C33 --> C34 --> C35 -->  
 6-Membered Ring (2) N2 --> C36 --> C37 --> C38 --> C39 --> C40 -->  
 6-Membered Ring (3) N3 --> C43 --> C44 --> C45 --> C46 --> C47 -->  
 6-Membered Ring (4) N4 --> C48 --> C49 --> C50 --> C51 --> C52 -->  
 6-Membered Ring (5) C5 --> C6 --> C7 --> C8 --> C9 --> C10 -->  
 6-Membered Ring (6) C15 --> C16 --> C17 --> C18 --> C19 --> C20 -->  
 6-Membered Ring (7) C25 --> C26 --> C27 --> C28 --> C29 --> C30 -->

**Short Ring-Interactions with Cg-Cg Distances < 6.0 Ang., Alpha < 20.0 Deg. and Beta < 60.0 Deg.**

- Cg(I) = Plane number I (= ring number in () above)
- Alpha = Dihedral Angle between Planes I and J (Deg)
- Beta = Angle Cg(I)-->Cg(J) or Cg(I)-->Me vector and normal to plane I (Deg)
- Gamma = Angle Cg(I)-->Cg(J) vector and normal to plane J (Deg)
- Cg-Cg = Distance between ring Centroids (Ang.)
- CgI\_Perp = Perpendicular distance of Cg(I) on ring J (Ang.)
- CgJ\_Perp = Perpendicular distance of Cg(J) on ring I (Ang.)

| Cg(I) | Cg(J) | [ARU(J)] | Cg-Cg      | Alpha    | Beta      | Gamma | CgI_Perp | CgJ_Perp  | Slippage   |
|-------|-------|----------|------------|----------|-----------|-------|----------|-----------|------------|
| Cg1   | Cg1   | [2566]   | 4,8577(12) | 0,5845   | 0,04(10)  | 48,8  | 48,8     | 3,2028(8) | 3,2028(8)  |
| Cg1   | Cg2   | [2566]   | 4,4470(12) | -0,1677  | 6,15(10)  | 39,2  | 41,3     | 3,3393(8) | 3,4477(8)  |
| Cg1   | Cg5   | [2676]   | 4,6783(12) | -12,7065 | 54,65(10) | 16,6  | 70,3     | 1,5772(8) | 4,4833(9)  |
| Cg2   | Cg1   | [2566]   | 4,4470(12) | 0,5845   | 6,15(10)  | 41,3  | 39,2     | 3,4477(8) | 3,3393(8)  |
| Cg2   | Cg5   | [1555]   | 5,2527(13) | 14,9964  | 52,63(10) | 44,8  | 37,4     | 4,1737(8) | 3,7291(9)  |
| Cg2   | Cg5   | [2676]   | 5,6484(13) | -12,7065 | 52,63(10) | 36,3  | 70,5     | 1,8837(8) | 4,5529(9)  |
| Cg3   | Cg3   | [2677]   | 5,5589(13) | 7,5211   | 0,03(10)  | 51,6  | 51,6     | 3,4507(9) | 3,4506(9)  |
| Cg3   | Cg4   | [2677]   | 4,9151(13) | 5,1305   | 7,20(11)  | 43,8  | 51       | 3,0961(9) | 3,5491(9)  |
| Cg3   | Cg5   | [1555]   | 5,8645(13) | 14,9964  | 79,12(10) | 34,2  | 68,7     | 2,1307(9) | 4,8478(9)  |
| Cg3   | Cg6   | [1555]   | 5,7604(14) | 11,0817  | 63,31(11) | 16,8  | 53,9     | 3,3915(9) | 5,5141(9)  |
| Cg3   | Cg7   | [1665]   | 5,0074(13) | 16,6017  | 62,29(11) | 13,6  | 74,7     | 1,3195(9) | 4,8675(10) |
| Cg4   | Cg3   | [2677]   | 4,9151(13) | 7,5211   | 7,20(11)  | 51    | 43,8     | 3,5491(9) | 3,0960(9)  |
| Cg5   | Cg1   | [1655]   | 5,6671(14) | 4,6286   | 54,65(10) | 57,2  | 67,6     | 2,1550(9) | 3,0731(8)  |
| Cg5   | Cg2   | [1555]   | 5,2528(13) | 3,3151   | 52,63(10) | 37,4  | 44,8     | 3,7291(9) | 4,1737(8)  |
| Cg5   | Cg7   | [1665]   | 4,2536(13) | 16,6017  | 38,74(11) | 14,2  | 28,5     | 3,7365(9) | 4,1243(9)  |
| Cg6   | Cg3   | [1555]   | 5,7603(14) | -4,0705  | 63,31(11) | 53,9  | 16,8     | 5,5141(9) | 3,3915(9)  |
| Cg6   | Cg3   | [2677]   | 5,1557(13) | 7,5211   | 63,31(11) | 14    | 66,4     | 2,0635(9) | 5,0022(9)  |
| Cg6   | Cg4   | [2677]   | 5,3453(15) | 5,1305   | 57,30(11) | 33,2  | 61,2     | 2,5711(9) | 4,4718(9)  |
| Cg6   | Cg6   | [2567]   | 5,0238(16) | -8,0029  | 0,00(11)  | 52,2  | 52,2     | 3,0789(9) | 3,0789(9)  |
| Cg7   | Cg1   | [2566]   | 5,8194(13) | 0,5845   | 87,10(11) | 25,4  | 62,7     | 2,6703(9) | 5,2554(8)  |
| Cg7   | Cg2   | [2566]   | 5,8523(13) | -0,1677  | 89,97(11) | 43,8  | 64,4     | 2,5269(9) | 4,2266(8)  |
| Cg7   | Cg5   | [1445]   | 4,2537(13) | 5,4565   | 38,74(11) | 28,5  | 14,2     | 4,1243(9) | 3,7366(9)  |
| Cg7   | Cg6   | [2567]   | 4,7463(14) | -8,0029  | 54,57(11) | 19,6  | 67,3     | 1,8318(9) | 4,4719(9)  |

|        |             |
|--------|-------------|
| [2566] | -X,1-Y,1-Z  |
| [2676] | 1-X,2-Y,1-Z |
| [1555] | X,Y,Z       |
| [2677] | 1-X,2-Y,2-Z |
| [1665] | 1+X,1+Y,Z   |

|        |             |
|--------|-------------|
| [1655] | 1+X,Y,Z     |
| [2567] | -X,1-Y,2-Z  |
| [1445] | -1+X,-1+Y,Z |

#### Analysis of X-H...Cg(Pi-Ring) Interactions (H..Cg < 3.0 Ang. - Gamma < 40.0 Deg)

- Cg(J) = Center of gravity of ring J (Plane number above)
- H-Perp = Perpendicular distance of H to ring plane J
- Gamma = Angle between Cg-H vector and ring J normal
- X-H..Cg = X-H-Cg angle (degrees)
- X..Cg = Distance of X to Cg (Angstrom)
- X-H, Pi = Angle of the X-H bond with the Pi-plane (i.e. ' Perpendicular = 90 degrees, Parallel = 0 degrees)

| X-H(I)   | Cg(J) | [ARU(J)] | H..Cg | H-Perp | Gamma | X-H..Cg | X..Cg    | X-H,Pi |
|----------|-------|----------|-------|--------|-------|---------|----------|--------|
| C9-H9    | Cg1   | [2676]   | 2,63  | 2,6    | 7,9   | 141     | 3,413(2) | 53     |
| C19-H19  | Cg7   | [2567]   | 2,75  | 2,69   | 10,98 | 138     | 3,510(3) | 50     |
| C41-H41C | Cg2   | [2566]   | 2,9   | -2,74  | 18,91 | 117     | 3,458(2) | 46     |

|        |             |
|--------|-------------|
| [2676] | 1-X,2-Y,1-Z |
| [2567] | -X,1-Y,2-Z  |
| [2566] | -X,1-Y,1-Z  |

#### Analysis of Y-X...Cg(Pi-Ring) Interactions (X..Cg < 4.0 Ang. - Gamma < 30.0 Deg)

| Y-X(I) | Cg(J) | [ARU(J)] | X..Cg      | X-Perp | Gamma | Y-X..Cg    | Y..Cg    | Y-X,Pi |
|--------|-------|----------|------------|--------|-------|------------|----------|--------|
| C1-F1  | Cg4   | [1555]   | 3,9453(19) | 3,515  | 27    | 112,00(12) | 4,614(3) | 0,04   |
| C1-F3  | Cg5   | [2676]   | 3,6259(17) | -3,405 | 20,09 | 108,96     | 4,256(3) | 0,25   |

|        |             |
|--------|-------------|
| [1555] | X,Y,Z       |
| [2676] | 1-X,2-Y,1-Z |

The Cg(I) refer to the Ring Centre-of-Gravity numbers given in ( ) in the Ring-Analysis above.

| Cg(I) | x            | y          | z          |
|-------|--------------|------------|------------|
| Cg1   | 0,00623(8)   | 0,69205(7) | 0,53857(4) |
| Cg2   | 0,33731(8)   | 0,63982(7) | 0,52661(4) |
| Cg3   | 0,60109(8)   | 0,95710(8) | 0,87916(5) |
| Cg4   | 0,30838(9)   | 1,07223(8) | 0,86330(5) |
| Cg5   | 0,77363(8)   | 1,00351(8) | 0,59525(5) |
| Cg6   | 0,23647(10)  | 0,60517(8) | 1,02184(5) |
| Cg7   | -0,12680(10) | 0,29409(8) | 0,75494(5) |

**Table S5:** Non-coordinative interactions in **4**.

6-Membered Ring (1) N1 --> C31 --> C32 --> C33 --> C34 --> C35 -->  
 6-Membered Ring (2) N2 --> C37 --> C38 --> C39 --> C40 --> C41 -->  
 6-Membered Ring (3) N3 --> C43 --> C44 --> C45 --> C46 --> C47 -->  
 6-Membered Ring (4) N4 --> C49 --> C50 --> C51 --> C52 --> C53 -->  
 6-Membered Ring (5) C5 --> C6 --> C7 --> C8 --> C9 --> C10 -->  
 6-Membered Ring (6) C15 --> C16 --> C17 --> C18 --> C19 --> C20 -->  
 6-Membered Ring (7) C25 --> C26 --> C27 --> C28 --> C29 --> C30 -->

**Analysis of Short Ring-Interactions with Cg-Cg Distances < 6.0 Ang., Alpha < 20.0 Deg. and Beta < 60.0 Deg.**

- Cg(I) = Plane number I (= ring number in () above)
- Alpha = Dihedral Angle between Planes I and J (Deg)
- Beta = Angle Cg(I)-->Cg(J) or Cg(I)-->Me vector and normal to plane I (Deg)
- Gamma = Angle Cg(I)-->Cg(J) vector and normal to plane J (Deg)
- Cg-Cg = Distance between ring Centroids (Ang.)
- CgI\_Perp = Perpendicular distance of Cg(I) on ring J (Ang.)
- CgJ\_Perp = Perpendicular distance of Cg(J) on ring I (Ang.)

| Cg(I) | Cg(J) | [ARU(J)] | Cg-Cg      | Alpha    | Beta      | Gamma | CgI_Perp | CgJ_Perp   | Slippage   |
|-------|-------|----------|------------|----------|-----------|-------|----------|------------|------------|
| Cg1   | Cg5   | [1555]   | 5,7119(14) | 12,1492  | 48,71(12) | 13,8  | 47,5     | 3,8624(10) | 5,5472(10) |
| Cg1   | Cg7   | [2655]   | 4,2310(14) | -2,8647  | 41,92(12) | 7,7   | 49,2     | 2,7649(11) | 4,1927(10) |
| Cg2   | Cg6   | [1555]   | 5,1314(15) | 12,2081  | 62,56(12) | 9,8   | 58,9     | 2,6471(10) | 5,0563(10) |
| Cg2   | Cg6   | [4565]   | 5,1783(15) | 3,3691   | 9,74(12)  | 45,8  | 45,6     | 3,6214(10) | 3,6079(10) |
| Cg3   | Cg1   | [4464]   | 4,9280(14) | -14,6495 | 58,92(12) | 15,7  | 74,1     | 1,3519(10) | 4,7438(10) |
| Cg3   | Cg3   | [3665]   | 5,1034(14) | -7,6555  | 0,00(12)  | 50,9  | 50,9     | 3,2209(10) | 3,2210(10) |
| Cg3   | Cg4   | [3665]   | 4,0648(14) | -6,9121  | 5,21(11)  | 33,1  | 35,7     | 3,3020(10) | 3,4053(10) |
| Cg3   | Cg6   | [1555]   | 5,6209(14) | 12,2081  | 80,78(12) | 40,1  | 51,4     | 3,5088(10) | 4,3011(10) |
| Cg4   | Cg3   | [3665]   | 4,0649(14) | -7,6555  | 5,21(11)  | 35,7  | 33,1     | 3,4052(10) | 3,3020(10) |
| Cg4   | Cg6   | [4564]   | 5,4299(15) | -8,6992  | 42,53(12) | 57,4  | 41       | 4,0995(10) | 2,9226(10) |
| Cg4   | Cg7   | [1555]   | 5,9906(15) | 9,767    | 81,82(12) | 21,5  | 60,3     | 2,9677(10) | 5,5721(10) |
| Cg5   | Cg1   | [1555]   | 5,7119(14) | 6,5906   | 48,71(12) | 47,5  | 13,8     | 5,5472(10) | 3,8624(10) |
| Cg5   | Cg5   | [3766]   | 4,8865(15) | -8,7339  | 0,03(11)  | 45,7  | 45,7     | 3,4152(10) | 3,4153(10) |
| Cg5   | Cg6   | [4565]   | 4,9669(14) | 3,3691   | 78,47(12) | 10,5  | 80,5     | 0,8166(10) | 4,8835(10) |
| Cg6   | Cg1   | [4464]   | 4,6669(15) | -14,6495 | 31,58(12) | 29,7  | 60,4     | 2,3047(10) | 4,0527(11) |
| Cg6   | Cg2   | [1555]   | 5,1313(15) | -1,0201  | 62,56(12) | 58,9  | 9,8      | 5,0563(10) | 2,6470(10) |
| Cg6   | Cg2   | [4464]   | 5,1784(15) | 9,8164   | 9,74(12)  | 45,6  | 45,8     | 3,6080(10) | 3,6215(10) |
| Cg6   | Cg3   | [1555]   | 5,6210(14) | 10,8764  | 80,78(12) | 51,4  | 40,1     | 4,3011(10) | 3,5088(10) |
| Cg6   | Cg4   | [4465]   | 5,4299(15) | -21,2497 | 42,53(12) | 41    | 57,4     | 2,9226(10) | 4,0995(10) |
| Cg6   | Cg7   | [2655]   | 5,9745(15) | -2,8647  | 42,95(12) | 46,2  | 62,4     | 2,7643(11) | 4,1350(11) |
| Cg7   | Cg1   | [2645]   | 4,2311(14) | 9,9263   | 41,92(12) | 49,2  | 7,7      | 4,1928(10) | 2,7650(11) |
| Cg7   | Cg3   | [3665]   | 5,0469(15) | -7,6555  | 82,87(12) | 22    | 65,5     | 2,0960(10) | 4,6781(10) |
| Cg7   | Cg5   | [3766]   | 4,8041(15) | -8,7339  | 64,67(12) | 13    | 70,7     | 1,5861(10) | 4,6804(10) |

|        |                     |
|--------|---------------------|
| [1555] | X,Y,Z               |
| [2655] | 3/2-X,1/2+Y,1/2-Z   |
| [4565] | 1/2+X,3/2-Y,1/2+Z   |
| [4464] | -1/2+X,3/2-Y,-1/2+Z |
| [3665] | 1-X,1-Y,-Z          |

|        |                    |
|--------|--------------------|
| [4564] | 1/2+X,3/2-Y,-1/2+Z |
| [3766] | 2-X,1-Y,1-Z        |
| [4465] | -1/2+X,3/2-Y,1/2+Z |
| [2645] | 3/2-X,-1/2+Y,1/2-Z |

#### Analysis of X-H...Cg(Pi-Ring) Interactions (H..Cg < 3.0 Ang. - Gamma < 40.0 Deg)

- Cg(J) = Center of gravity of ring J (Plane number above)
- H-Perp = Perpendicular distance of H to ring plane J
- Gamma = Angle between Cg-H vector and ring J normal
- X-H..Cg = X-H-Cg angle (degrees)
- X..Cg = Distance of X to Cg (Angstrom)
- X-H, Pi = Angle of the X-H bond with the Pi-plane (i.e. ' Perpendicular = 90 degrees, Parallel = 0 degrees)

| X--H(I) | Cg(J) | [ARU(J)] | H..Cg | H-Perp | Gamma | X-H..Cg | X..Cg    | X-H,Pi |
|---------|-------|----------|-------|--------|-------|---------|----------|--------|
| C7-H7   | Cg7   | [3766]   | 2,83  | 2,8    | 8,49  | 137     | 3,585(3) | 54     |
| C16-H16 | Cg5   | [4464]   | 2,9   | 2,88   | 6,52  | 143     | 3,708(3) | 59     |
| C29-H29 | Cg1   | [2645]   | 2,98  | 2,72   | 24,49 | 105     | 3,351(3) | 39     |
| C32-H32 | Cg6   | [4565]   | 2,92  | -2,9   | 5,89  | 125     | 3,552(3) | 29     |
| C33-H33 | Cg3   | [4565]   | 2,77  | 2,77   | 2,03  | 149     | 3,618(3) | 57     |

|        |                     |
|--------|---------------------|
| [3766] | 2-X,1-Y,1-Z         |
| [4464] | -1/2+X,3/2-Y,-1/2+Z |
| [2645] | 3/2-X,-1/2+Y,1/2-Z  |
| [4565] | 1/2+X,3/2-Y,1/2+Z   |

The Cg(I) refer to the Ring Centre-of-Gravity numbers given in ( ) in the Ring-Analysis above.

| Cg(I) | x          | y          | z           |
|-------|------------|------------|-------------|
| Cg1   | 0,75904(7) | 0,75604(4) | 0,40758(7)  |
| Cg2   | 0,50485(7) | 0,67682(4) | 0,44873(7)  |
| Cg3   | 0,39767(7) | 0,57206(4) | 0,06871(7)  |
| Cg4   | 0,65311(7) | 0,59984(4) | -0,02858(7) |
| Cg5   | 0,87894(7) | 0,54238(4) | 0,57635(7)  |
| Cg6   | 0,27209(7) | 0,77775(4) | 0,20810(7)  |
| Cg7   | 0,87226(7) | 0,41339(5) | 0,18479(7)  |

**Table S6:** Non-coordinative interactions in **5**.

6-Membered Ring (1) N1 --> C31 --> C32 --> C33 --> C34 --> C35 -->  
 6-Membered Ring (2) N2 --> C36 --> C37 --> C38 --> C39 --> C40 -->  
 6-Membered Ring (3) N3 --> C41 --> C42 --> C43 --> C44 --> C45 -->  
 6-Membered Ring (4) C5 --> C6 --> C7 --> C8 --> C9 --> C10 -->  
 6-Membered Ring (5) C15 --> C16 --> C17 --> C18 --> C19 --> C20 -->  
 6-Membered Ring (6) C25 --> C26 --> C27 --> C28 --> C29 --> C30 -->

**Short Ring-Interactions with Cg-Cg Distances < 6.0 Ang., Alpha < 20.000 Deg. and Beta < 60.0 Deg.**

- Cg(I) = Plane number I (= ring number in () above)
- Alpha = Dihedral Angle between Planes I and J (Deg)
- Beta = Angle Cg(I)-->Cg(J) or Cg(I)-->Me vector and normal to plane I (Deg)
- Gamma = Angle Cg(I)-->Cg(J) vector and normal to plane J (Deg)
- Cg-Cg = Distance between ring Centroids (Ang.)
- CgI\_Perp = Perpendicular distance of Cg(I) on ring J (Ang.)
- CgJ\_Perp = Perpendicular distance of Cg(J) on ring I (Ang.)

| Cg(I) | Cg(J) | [ARU(J)] | Cg-Cg    | Alpha   | Beta      | Gamma | CgI_Perp | CgJ_Perp   | Slippage   |
|-------|-------|----------|----------|---------|-----------|-------|----------|------------|------------|
| Cg1   | Cg3   | [2655]   | 5,544(2) | 0,0627  | 73,1(2)   | 39,6  | 63,5     | 2,4771(18) | 4,2723(17) |
| Cg1   | Cg6   | [1555]   | 5,494(2) | 19,953  | 85,8(2)   | 11,5  | 74,4     | 1,4736(17) | 5,3834(17) |
| Cg1   | Cg6   | [1655]   | 5,331(2) | 21,8139 | 85,8(2)   | 22,8  | 85,8     | 0,3872(17) | 4,9156(17) |
| Cg2   | Cg4   | [1455]   | 5,649(3) | 17,4352 | 68,1(2)   | 28,9  | 63,4     | 2,5291(17) | 4,9451(16) |
| Cg2   | Cg4   | [1555]   | 5,528(3) | 21,6492 | 68,1(2)   | 8,3   | 72,3     | 1,6849(17) | 5,4700(16) |
| Cg2   | Cg5   | [1545]   | 5,639(2) | -7,9962 | 64,5(2)   | 55,2  | 32,3     | 4,7640(16) | 3,2150(15) |
| Cg3   | Cg4   | [1455]   | 5,028(2) | 17,4352 | 80,8(2)   | 12,5  | 85       | 0,4348(16) | 4,9078(16) |
| Cg3   | Cg5   | [4564]   | 3,762(2) | 2,5945  | 20,53(18) | 27,9  | 7,4      | 3,7303(16) | 3,3250(15) |
| Cg4   | Cg1   | [4664]   | 5,538(2) | -4,2934 | 64,4(2)   | 37    | 67,9     | 2,0823(17) | 4,4204(17) |
| Cg4   | Cg5   | [4564]   | 5,115(2) | 2,5945  | 83,03(19) | 24,4  | 79,4     | 0,9366(17) | 4,6564(15) |
| Cg4   | Cg6   | [1655]   | 3,968(3) | 21,8139 | 18,7(2)   | 25,7  | 27,8     | 3,5112(18) | 3,5756(18) |
| Cg5   | Cg1   | [1565]   | 5,155(2) | 6,5867  | 88,5(2)   | 22,3  | 74,7     | 1,3645(15) | 4,7708(18) |
| Cg5   | Cg2   | [1565]   | 5,639(2) | 9,0919  | 64,5(2)   | 32,3  | 55,2     | 3,2150(15) | 4,7640(16) |
| Cg5   | Cg2   | [2655]   | 5,641(2) | 4,8282  | 31,8(2)   | 48,6  | 61,5     | 2,6944(15) | 3,7290(19) |
| Cg5   | Cg3   | [2655]   | 3,762(2) | 0,0627  | 20,53(18) | 7,4   | 27,9     | 3,3249(15) | 3,7302(16) |
| Cg5   | Cg6   | [1565]   | 5,899(2) | 26,6359 | 75,1(2)   | 44,8  | 77,4     | 1,2887(15) | 4,1837(18) |
| Cg6   | Cg3   | [2655]   | 4,745(2) | 0,0627  | 68,3(2)   | 9,4   | 71,7     | 1,4910(18) | 4,6820(16) |
| Cg6   | Cg4   | [1455]   | 3,968(3) | 17,4352 | 18,7(2)   | 27,8  | 25,7     | 3,5755(18) | 3,5112(18) |

|        |                |
|--------|----------------|
| [2655] | 1-Y,X,1/4+Z    |
| [1555] | X,Y,Z          |
| [1655] | 1+X,Y,Z        |
| [1455] | -1+X,Y,Z       |
| [1545] | X,-1+Y,Z       |
| [4564] | Y,1-X,-1/4+Z   |
| [4664] | 1+Y,1-X,-1/4+Z |
| [1565] | X,1+Y,Z        |

**Analysis of X-H...Cg(Pi-Ring) Interactions (H...Cg < 3.0 Ang. - Gamma < 40.0 Deg)**

- Cg(J) = Center of gravity of ring J (Plane number above)

- H-Perp = Perpendicular distance of H to ring plane J
- Gamma = Angle between Cg-H vector and ring J normal
- X-H..Cg = X-H-Cg angle (degrees)
- X..Cg = Distance of X to Cg (Angstrom)
- X-H, Pi = Angle of the X-H bond with the Pi-plane (i.e. ' Perpendicular = 90 degrees, Parallel = 0 degrees)

| X--H(I) | Cg(J) | [ARU(J)] | H..Cg | H-Perp | Gamma | X-H..Cg | X..Cg    | X-H,Pi |
|---------|-------|----------|-------|--------|-------|---------|----------|--------|
| C9-H9   | Cg3   | [1655]   | 2,72  | -2,65  | 13,08 | 170     | 3,655(5) | 76     |
| C44-H44 | Cg6   | [4564]   | 2,78  | 2,72   | 12,03 | 136     | 3,525(5) | 57     |

|        |              |
|--------|--------------|
| [1655] | 1+X,Y,Z      |
| [4564] | Y,1-X,-1/4+Z |

The Cg(I) refer to the Ring Centre-of-Gravity numbers given in ( ) in the Ring-Analysis above.

| Cg(I) | x           | y           | z          |
|-------|-------------|-------------|------------|
| Cg1   | 0,85023(17) | 0,45795(17) | 0,58240(4) |
| Cg2   | 0,84335(18) | 0,27987(14) | 0,48419(5) |
| Cg3   | 0,75452(15) | 0,50985(16) | 0,39821(4) |
| Cg4   | 1,33732(15) | 0,40775(16) | 0,45419(5) |
| Cg5   | 0,61505(14) | 1,03667(14) | 0,59943(4) |
| Cg6   | 0,34238(16) | 0,49530(17) | 0,55540(5) |

**Table S7:** Non-coordinative interactions in **6**.

6-Membered Ring (1) N1 --> C31 --> C32 --> C33 --> C34 --> C35 -->  
 6-Membered Ring (2) N2 --> C36 --> C39A --> C40A --> C41A --> C42A -->  
 6-Membered Ring (3) N2 --> C36 --> C39 --> C40 --> C41 --> C42 -->  
 6-Membered Ring (4) C5 --> C6 --> C7 --> C8 --> C9 --> C10 -->  
 6-Membered Ring (5) C15 --> C16 --> C17 --> C18 --> C19 --> C20 -->  
 6-Membered Ring (6) C25 --> C26 --> C27 --> C28 --> C29 --> C30 -->  
 6-Membered Ring (7) C34 --> C35 --> C36 --> C39A --> C38A --> C37A -->  
 6-Membered Ring (8) C34 --> C35 --> C36 --> C39 --> C38 --> C37 -->

**Analysis of Short Ring-Interactions with Cg-Cg Distances < 6.0 Ang., Alpha < 20.000 Deg. and Beta < 60.0 Deg.**

- Cg(I) = Plane number I (= ring number in () above)
- Alpha = Dihedral Angle between Planes I and J (Deg)
- Beta = Angle Cg(I)-->Cg(J) or Cg(I)-->Me vector and normal to plane I (Deg)
- Gamma = Angle Cg(I)-->Cg(J) vector and normal to plane J (Deg)
- Cg-Cg = Distance between ring Centroids (Ang.)
- CgI\_Perp = Perpendicular distance of Cg(I) on ring J (Ang.)
- CgJ\_Perp = Perpendicular distance of Cg(J) on ring I (Ang.)

| Cg(I) | Cg(J) | [ARU(J)] | Cg-Cg      | Alpha    | Beta      | Gamma | CgI_Perp | CgJ_Perp   | Slippage   |
|-------|-------|----------|------------|----------|-----------|-------|----------|------------|------------|
| Cg1   | Cg2   | [2666]   | 5,856(3)   | -2,3357  | 13,1(2)   | 55,1  | 68,1     | 2,1806(10) | 3,350(2)   |
| Cg1   | Cg5   | [1555]   | 5,6085(15) | 8,9398   | 77,83(12) | 11    | 85,6     | 0,4306(10) | 5,5061(10) |
| Cg1   | Cg6   | [1655]   | 5,1757(15) | -7,2835  | 37,67(12) | 57,4  | 38,7     | 4,0421(9)  | 2,7904(10) |
| Cg2   | Cg2   | [2666]   | 3,646(3)   | -2,3357  | 0,0(3)    | 43,3  | 43,3     | 2,653(2)   | 2,653(2)   |
| Cg2   | Cg3   | [2666]   | 4,084(4)   | -7,6254  | 22,7(3)   | 38,8  | 22,2     | 3,780(2)   | 3,180(2)   |
| Cg2   | Cg5   | [2666]   | 5,752(3)   | -16,0737 | 89,9(2)   | 55,3  | 35,4     | 4,686(2)   | 3,2719(10) |
| Cg3   | Cg2   | [2666]   | 4,084(4)   | -2,3357  | 22,7(3)   | 22,2  | 38,8     | 3,180(2)   | 3,780(2)   |
| Cg3   | Cg3   | [2666]   | 4,543(4)   | -7,6254  | 0,0(3)    | 18,8  | 18,8     | 4,300(3)   | 4,300(3)   |
| Cg4   | Cg4   | [2565]   | 3,8722(16) | -2,3861  | 0,02(13)  | 24,2  | 24,2     | 3,5311(11) | 3,5310(11) |
| Cg4   | Cg5   | [1455]   | 5,9152(17) | 7,4395   | 82,08(13) | 53,4  | 60,5     | 2,9151(11) | 3,5255(11) |
| Cg5   | Cg2   | [2666]   | 5,752(3)   | -2,3357  | 89,9(2)   | 35,4  | 55,3     | 3,2719(10) | 4,686(2)   |
| Cg5   | Cg3   | [2666]   | 5,545(3)   | -7,6254  | 67,3(2)   | 30,6  | 83       | 0,6740(10) | 4,771(2)   |
| Cg5   | Cg4   | [2665]   | 5,3689(15) | -10,532  | 82,08(13) | 28,1  | 89,9     | 0,0056(11) | 4,7374(11) |
| Cg6   | Cg1   | [1455]   | 5,1758(15) | 2,0268   | 37,67(12) | 38,7  | 57,4     | 2,7903(10) | 4,0420(9)  |
| Cg6   | Cg4   | [2565]   | 5,8181(16) | -2,3861  | 83,53(13) | 31,2  | 73,5     | 1,6523(12) | 4,9742(11) |
| Cg6   | Cg5   | [1545]   | 5,0121(16) | 1,7133   | 73,05(13) | 11,2  | 77,7     | 1,0718(11) | 4,9164(11) |

|        |             |
|--------|-------------|
| [2666] | 1-X,1-Y,1-Z |
| [1555] | X,Y,Z       |
| [1655] | 1+X,Y,Z     |
| [2565] | -X,1-Y,-Z   |
| [1455] | -1+X,Y,Z    |
| [2665] | 1-X,1-Y,-Z  |
| [1545] | X,-1+Y,Z    |

**Analysis of X-H...Cg(Pi-Ring) Interactions (H..Cg < 3.0 Ang. - Gamma < 40.0 Deg)**

- Cg(J) = Center of gravity of ring J (Plane number above)
- H-Perp = Perpendicular distance of H to ring plane J
- Gamma = Angle between Cg-H vector and ring J normal
- X-H..Cg = X-H-Cg angle (degrees)

- X..Cg = Distance of X to Cg (Angstrom)

- X-H, Pi = Angle of the X-H bond with the Pi-plane (i.e. ' Perpendicular = 90 degrees, Parallel = 0 degrees)

| X--H(I)   | Cg(J)       | [ARU(J)] | H..Cg | H-Perp | Gamma | X-H..Cg | X..Cg    | X-H,Pi |
|-----------|-------------|----------|-------|--------|-------|---------|----------|--------|
| C16-H16   | Cg6         | [1565]   | 2,96  | -2,95  | 5,94  | 142     | 3,756(3) | 57     |
| C40A-H40A | Cg2         | [2666]   | 2,81  | 2,75   | 12,23 | 88      | 2,936(6) | 4      |
| [1565]    | X,1+Y,Z     |          |       |        |       |         |          |        |
| [2666]    | 1-X,1-Y,1-Z |          |       |        |       |         |          |        |

#### Analysis of Y-X...Cg(Pi-Ring) Interactions (X..Cg < 4.0 Ang. - Gamma < 30.0 Deg)

| Y--X(I) | Cg(J) | [ARU(J)] | X..Cg    | X-Perp | Gamma | Y-X..Cg    | Y..Cg    | Y-X,Pi |
|---------|-------|----------|----------|--------|-------|------------|----------|--------|
| C1-F1   | Cg6   | [1655]   | 3,858(2) | 3,356  | 29,56 | 167,06(15) | 5,167(3) | 47,72  |
| C1-F3   | Cg4   | [2665]   | 3,577(2) | 3,266  | 24,07 | 102,79(15) | 4,087(3) | 30,24  |
| C21-F5  | Cg3   | [2656]   | 3,995(3) | -3,699 | 22,18 | 112,99(18) | 4,699(4) | 18,12  |

|        |            |
|--------|------------|
| [1655] | 1+X,Y,Z    |
| [2665] | 1-X,1-Y,-Z |
| [2656] | 1-X,-Y,1-Z |

The Cg(I) refer to the Ring Centre-of-Gravity numbers given in ( ) in the Ring-Analysis above.

| Cg(I) | x           | y           | z           |
|-------|-------------|-------------|-------------|
| Cg1   | 0,80129(8)  | 0,28665(8)  | 0,32147(6)  |
| Cg2   | 0,4759(2)   | 0,3597(2)   | 0,49575(14) |
| Cg3   | 0,4884(2)   | 0,3159(2)   | 0,50883(13) |
| Cg4   | 0,14395(11) | 0,57318(8)  | 0,01021(6)  |
| Cg5   | 0,58358(11) | 0,72657(8)  | 0,17276(6)  |
| Cg6   | 0,12228(12) | -0,00357(8) | 0,16133(7)  |

**Table S8:** Non-coordinative interactions in 7.

6-Membered Ring (1) N1 --> C31 --> C32 --> C33 --> C34 --> C35 -->  
 6-Membered Ring (2) N2 --> C36 --> C37 --> C38 --> C39 --> C40 -->  
 6-Membered Ring (3) C5 --> C6 --> C7 --> C8 --> C9 --> C10 -->  
 6-Membered Ring (4) C15 --> C16 --> C17 --> C18 --> C19 --> C20 -->  
 6-Membered Ring (5) C25 --> C26 --> C27 --> C28 --> C29 --> C30 -->

**Short Ring-Interactions with Cg-Cg Distances < 6.0 Ang., Alpha < 20.0 Deg. and Beta < 60.0 Deg.**

- Cg(I) = Plane number I (= ring number in () above)
- Alpha = Dihedral Angle between Planes I and J (Deg)
- Beta = Angle Cg(I)-->Cg(J) or Cg(I)-->Me vector and normal to plane I (Deg)
- Gamma = Angle Cg(I)-->Cg(J) vector and normal to plane J (Deg)
- Cg-Cg = Distance between ring Centroids (Ang.)
- CgI\_Perp = Perpendicular distance of Cg(I) on ring J (Ang.)
- CgJ\_Perp = Perpendicular distance of Cg(J) on ring I (Ang.)

| Cg(I) | Cg(J) | [ARU(J)] | Cg-Cg      | Alpha   | Beta      | Gamma | CgI_Perp | CgJ_Perp   | Slippage   |
|-------|-------|----------|------------|---------|-----------|-------|----------|------------|------------|
| Cg1   | Cg1   | [2566]   | 5,7078(19) | -3,197  | 0,04(13)  | 55,5  | 55,5     | 3,2347(11) | 3,2347(11) |
| Cg1   | Cg2   | [2566]   | 3,7247(15) | -3,3423 | 6,01(12)  | 24,2  | 20       | 3,5006(11) | 3,3972(10) |
| Cg1   | Cg4   | [1545]   | 5,8143(16) | 7,0411  | 86,17(13) | 31,3  | 81,2     | 0,8887(10) | 4,9682(13) |
| Cg2   | Cg1   | [2566]   | 3,7247(15) | -3,197  | 6,01(12)  | 20    | 24,2     | 3,3972(10) | 3,5005(11) |
| Cg2   | Cg2   | [2566]   | 5,5142(15) | -3,3423 | 0,02(12)  | 52,9  | 52,9     | 3,3250(10) | 3,3250(10) |
| Cg2   | Cg3   | [1555]   | 4,7549(15) | 10,6198 | 50,76(13) | 31,3  | 36,3     | 3,8337(11) | 4,0640(12) |
| Cg2   | Cg4   | [1545]   | 5,4088(17) | 7,0411  | 83,36(13) | 27,4  | 71       | 1,7609(11) | 4,8009(13) |
| Cg3   | Cg2   | [1555]   | 4,7549(15) | 0,0173  | 50,76(13) | 36,3  | 31,3     | 4,0639(12) | 3,8337(11) |
| Cg3   | Cg4   | [1545]   | 4,8758(17) | 7,0411  | 32,61(14) | 57,9  | 37,4     | 3,8735(11) | 2,5942(13) |
| Cg3   | Cg5   | [1545]   | 5,806(2)   | 12,5445 | 19,06(14) | 58    | 50,1     | 3,7223(12) | 3,0724(13) |
| Cg4   | Cg1   | [2566]   | 5,9208(17) | -3,197  | 86,17(13) | 43,1  | 64,2     | 2,5793(13) | 4,3260(10) |
| Cg4   | Cg3   | [1565]   | 4,8757(17) | 8,4727  | 32,61(14) | 37,4  | 57,9     | 2,5941(13) | 3,8735(11) |
| Cg4   | Cg4   | [2576]   | 4,0625(18) | -8,0478 | 0,04(14)  | 32,2  | 32,2     | 3,4373(12) | 3,4372(12) |
| Cg4   | Cg5   | [1555]   | 5,9175(19) | 6,7314  | 51,66(15) | 29,9  | 29,6     | 5,1443(13) | 5,1292(13) |
| Cg5   | Cg3   | [1565]   | 5,806(2)   | 8,4727  | 19,06(14) | 50,1  | 58       | 3,0724(13) | 3,7222(12) |
| Cg5   | Cg4   | [1555]   | 5,9176(19) | 11,4851 | 51,66(15) | 29,6  | 29,9     | 5,1293(13) | 5,1444(13) |

|        |            |
|--------|------------|
| [2566] | -X,1-Y,1-Z |
| [1545] | X,-1+Y,Z   |
| [1555] | X,Y,Z      |
| [1565] | X,1+Y,Z    |
| [2576] | -X,2-Y,1-Z |

**Analysis of X-H...Cg(Pi-Ring) Interactions (H...Cg < 3.0 Ang. - Gamma < 40.0 Deg)**

- Cg(J) = Center of gravity of ring J (Plane number above)
- H-Perp = Perpendicular distance of H to ring plane J
- Gamma = Angle between Cg-H vector and ring J normal
- X-H...Cg = X-H-Cg angle (degrees)
- X...Cg = Distance of X to Cg (Angstrom)
- X-H, Pi = Angle of the X-H bond with the Pi-plane (i.e. ' Perpendicular = 90 degrees, Parallel = 0 degrees)

| X-H(I)   | Cg(J) | [ARU(J)] | H...Cg | H-Perp | Gamma | X-H...Cg | X...Cg   | X-H,Pi |
|----------|-------|----------|--------|--------|-------|----------|----------|--------|
| C43-H43B | Cg3   | [2667]   | 2,77   | 2,74   | 7,72  | 149      | 3,651(3) | 64     |

|        |             |
|--------|-------------|
| [2667] | 1-X,1-Y,2-Z |
|--------|-------------|

**Analysis of Y-X...Cg(Pi-Ring) Interactions (X..Cg < 4.0 Ang. - Gamma < 30.0 Deg)**

| Y--X(I) | Cg(J) | [ARU(J)] | X..Cg    | X-Perp | Gamma | Y-X..Cg    | Y..Cg    | Y-X,Pi |
|---------|-------|----------|----------|--------|-------|------------|----------|--------|
| C1-F1   | Cg5   | [1545]   | 3,510(2) | -3,105 | 27,8  | 116,43(14) | 4,277(3) | 30,18  |
| C1-F3   | Cg1   | [1555]   | 3,677(2) | -3,35  | 24,34 | 123,42(15) | 4,556(3) | 31,86  |
| C21-F7  | Cg5   | [2677]   | 3,396(3) | 3,277  | 15,22 | 102,43(19) | 3,903(4) | 27,48  |
| C21-F9  | Cg5   | [2677]   | 3,853(3) | 3,518  | 24,06 | 82,15(18)  | 3,903(4) | 16,05  |

|        |             |
|--------|-------------|
| [1545] | X,-1+Y,Z    |
| [1555] | X,Y,Z       |
| [2677] | 1-X,2-Y,2-Z |

The Cg(I) refer to the Ring Centre-of-Gravity numbers given in (I) in the Ring-Analysis above.

| Cg(I) | x           | y           | z          |
|-------|-------------|-------------|------------|
| Cg1   | 0,23168(11) | 0,45936(8)  | 0,49819(6) |
| Cg2   | -0,00410(8) | 0,43605(8)  | 0,64580(7) |
| Cg3   | 0,12767(11) | 0,28003(10) | 0,87813(7) |
| Cg4   | 0,13158(12) | 1,03407(10) | 0,61600(8) |
| Cg5   | 0,61868(12) | 1,22418(12) | 0,90289(8) |

**Table S9:** Non-coordinative interactions in **8**.

5-Membered Ring (1) N2 --> C36 --> N3 --> C42 --> C37 -->  
 6-Membered Ring (2) N1 --> C31 --> C32 --> C33 --> C34 --> C35 -->  
 6-Membered Ring (3) C5 --> C6 --> C7 --> C8 --> C9 --> C10 -->  
 6-Membered Ring (4) C15 --> C16 --> C17 --> C18 --> C19 --> C20 -->  
 6-Membered Ring (5) C25 --> C26 --> C27 --> C28 --> C29 --> C30 -->  
 6-Membered Ring (6) C37 --> C38 --> C39 --> C40 --> C41 --> C42 -->  
 9-Membered Ring (7) N2 --> C36 --> N3 --> C42 --> C41 --> C40 --> C39 --> C38 --> C37 -->

**Short Ring-Interactions with Cg-Cg Distances < 6.0 Ang., Alpha < 20.0 Deg. and Beta < 60.0 Deg.**

- Cg(I) = Plane number I (= ring number in () above)
- Alpha = Dihedral Angle between Planes I and J (Deg)
- Beta = Angle Cg(I)-->Cg(J) or Cg(I)-->Me vector and normal to plane I (Deg)
- Gamma = Angle Cg(I)-->Cg(J) vector and normal to plane J (Deg)
- Cg-Cg = Distance between ring Centroids (Ang.)
- CgI\_Perp = Perpendicular distance of Cg(I) on ring J (Ang.)
- CgJ\_Perp = Perpendicular distance of Cg(J) on ring I (Ang.)

| Cg(I) | Cg(J) | [ARU(J)] | Cg-Cg      | Alpha    | Beta      | Gamma | CgI_Perp | CgJ_Perp   | Slippage   |
|-------|-------|----------|------------|----------|-----------|-------|----------|------------|------------|
| Cg1   | Cg1   | [2775]   | 4,428(2)   | -18,2379 | 0,00(19)  | 46,3  | 46,3     | 3,0574(14) | 3,0573(14) |
| Cg1   | Cg2   | [2775]   | 3,606(2)   | -18,6905 | 7,56(18)  | 24,7  | 26,7     | 3,2204(14) | 3,2759(14) |
| Cg1   | Cg5   | [2765]   | 5,025(2)   | -14,3594 | 48,95(18) | 25,7  | 70,4     | 1,6860(14) | 4,5298(16) |
| Cg1   | Cg7   | [2775]   | 5,333(2)   | -18,2348 | 0,89(16)  | 54,8  | 55,5     | 3,0169(14) | 3,0773(11) |
| Cg2   | Cg1   | [2775]   | 3,606(2)   | -18,2379 | 7,56(18)  | 26,7  | 24,7     | 3,2759(14) | 3,2204(14) |
| Cg2   | Cg4   | [2675]   | 5,3121(19) | 7,1666   | 83,84(16) | 31,1  | 56,9     | 2,9041(12) | 4,5502(15) |
| Cg2   | Cg6   | [2775]   | 3,714(2)   | -18,1887 | 8,82(17)  | 19,9  | 28       | 3,2781(14) | 3,4930(15) |
| Cg2   | Cg7   | [2775]   | 3,5163(19) | -18,2348 | 8,24(15)  | 16,1  | 20,4     | 3,2950(14) | 3,3779(12) |
| Cg3   | Cg4   | [2676]   | 4,834(2)   | -3,13    | 68,22(18) | 12,6  | 76       | 1,1712(16) | 4,7172(16) |
| Cg4   | Cg2   | [2675]   | 5,3122(19) | -12,8967 | 83,84(16) | 56,9  | 31,1     | 4,5502(15) | 2,9042(12) |
| Cg4   | Cg3   | [1555]   | 5,332(2)   | 14,5448  | 68,22(18) | 19,4  | 65,7     | 2,1967(16) | 5,0279(16) |
| Cg4   | Cg5   | [1465]   | 5,616(2)   | 11,7071  | 69,17(16) | 41,7  | 88,7     | 0,1237(15) | 4,1920(14) |
| Cg5   | Cg1   | [1555]   | 5,829(2)   | 15,1805  | 48,95(18) | 41,9  | 61,6     | 2,7723(16) | 4,3366(14) |
| Cg5   | Cg3   | [2666]   | 5,467(2)   | -8,2196  | 38,5(2)   | 36,6  | 74,8     | 1,4342(17) | 4,3915(16) |
| Cg5   | Cg6   | [1555]   | 4,793(2)   | 15,2617  | 48,59(18) | 21,9  | 55,5     | 2,7167(16) | 4,4463(15) |
| Cg5   | Cg7   | [1555]   | 5,157(2)   | 15,2161  | 48,71(15) | 31,5  | 58,1     | 2,7270(16) | 4,3958(11) |
| Cg6   | Cg2   | [2775]   | 3,714(2)   | -18,6905 | 8,82(17)  | 28    | 19,9     | 3,4930(15) | 3,2782(14) |
| Cg6   | Cg5   | [1555]   | 4,793(2)   | 11,7089  | 48,59(18) | 55,5  | 21,9     | 4,4463(15) | 2,7167(16) |
| Cg6   | Cg5   | [2765]   | 4,817(2)   | -14,3594 | 48,59(18) | 20,6  | 68,1     | 1,7958(15) | 4,5079(16) |
| Cg7   | Cg1   | [2775]   | 5,333(2)   | -18,2379 | 0,89(16)  | 55,5  | 54,8     | 3,0774(11) | 3,0168(14) |
| Cg7   | Cg2   | [2775]   | 3,5164(19) | -18,6905 | 8,24(15)  | 20,4  | 16,1     | 3,3780(12) | 3,2950(14) |
| Cg7   | Cg5   | [1555]   | 5,157(2)   | 11,7089  | 48,71(15) | 58,1  | 31,5     | 4,3958(11) | 2,7270(16) |
| Cg7   | Cg5   | [2765]   | 4,792(2)   | -14,3594 | 48,71(15) | 20,1  | 68,6     | 1,7453(11) | 4,5001(16) |

|        |             |        |             |
|--------|-------------|--------|-------------|
| [2775] | 2-X,2-Y,-Z  | [1555] | X,Y,Z       |
| [2765] | 2-X,1-Y,-Z  | [1465] | -1+X,1+Y,Z  |
| [2675] | 1-X,2-Y,-Z  | [2666] | 1-X,1-Y,1-Z |
| [2676] | 1-X,2-Y,1-Z |        |             |

**Analysis of X-H...Cg(Pi-Ring) Interactions (H...Cg < 3.0 Ang. - Gamma < 40.0 Deg)**

- Cg(J) = Center of gravity of ring J (Plane number above)
- H-Perp = Perpendicular distance of H to ring plane J
- Gamma = Angle between Cg-H vector and ring J normal
- X-H..Cg = X-H-Cg angle (degrees)
- X..Cg = Distance of X to Cg (Angstrom)
- X-H, Pi = Angle of the X-H bond with the Pi-plane (i.e. ' Perpendicular = 90 degrees, Parallel = 0 degrees)

| X--H(I)  | Cg(J) | [ARU(J)] | H..Cg | H-Perp | Gamma | X-H..Cg | X..Cg    | X-H,Pi |
|----------|-------|----------|-------|--------|-------|---------|----------|--------|
| C20-H20  | Cg3   | [2676]   | 2,83  | 2,81   | 6,17  | 139     | 3,597(4) | 55     |
| C29-H29  | Cg1   | [2765]   | 2,99  | -2,95  | 8,75  | 141     | 3,776(4) | 43     |
| C43-H43C | Cg3   | [2666]   | 2,91  | -2,86  | 10,71 | 124     | 3,549(5) | 26     |

|        |             |
|--------|-------------|
| [2676] | 1-X,2-Y,1-Z |
| [2765] | 2-X,1-Y,-Z  |
| [2666] | 1-X,1-Y,1-Z |

#### Analysis of Y-X...Cg(Pi-Ring) Interactions (X..Cg < 4.0 Ang. - Gamma < 30.0 Deg)

| Y--X(I) | Cg(J) | [ARU(J)] | X..Cg    | X-Perp | Gamma | Y-X..Cg    | Y..Cg    | Y-X,Pi |
|---------|-------|----------|----------|--------|-------|------------|----------|--------|
| C11-F4  | Cg5   | [1565]   | 3,856(3) | -3,429 | 27,22 | 110,42(17) | 4,497(4) | 12,99  |
| C21-F9  | Cg2   | [1555]   | 3,799(3) | -3,646 | 16,32 | 123,0(2)   | 4,663(5) | 28,82  |
| C21-F9  | Cg4   | [2675]   | 3,399(2) | -3,307 | 13,39 | 132,1(2)   | 4,407(4) | 45,26  |

|        |            |
|--------|------------|
| [1565] | X,1+Y,Z    |
| [1555] | X,Y,Z      |
| [2675] | 1-X,2-Y,-Z |

The Cg(I) refer to the Ring Centre-of-Gravity numbers given in ( ) in the Ring-Analysis above.

| Cg(I) | x           | y           | z           |
|-------|-------------|-------------|-------------|
| Cg1   | 1,01532(12) | 0,83024(10) | 0,01112(9)  |
| Cg2   | 0,74595(12) | 1,05598(11) | -0,05983(8) |
| Cg3   | 0,51635(13) | 0,67542(13) | 0,63512(12) |
| Cg4   | 0,31042(12) | 1,01728(12) | 0,36538(8)  |
| Cg5   | 0,96477(12) | 0,36308(12) | 0,21125(10) |
| Cg6   | 1,15397(12) | 0,70085(12) | 0,04710(9)  |
| Cg7   | 1,09389(9)  | 0,75657(9)  | 0,03159(7)  |

**Table S10:** Non-coordinative interactions in **9**.

6-Membered Ring (1) N1 --> C1 --> C2 --> C3 --> C4 --> C5 -->  
 6-Membered Ring (2) N2 --> C6 --> C7 --> C8 --> C9 --> C10 -->  
 6-Membered Ring (3) C17 --> C18 --> C19 --> C20 --> C21 --> C22 -->  
 6-Membered Ring (4) C27 --> C28 --> C29 --> C30 --> C31 --> C32 -->  
 6-Membered Ring (5) C37 --> C38 --> C39 --> C40 --> C41 --> C42 -->#

**Short Ring-Interactions with Cg-Cg Distances < 6.0 Ang., Alpha < 20.0 Deg. and Beta < 60.0 Deg.**

- Cg(I) = Plane number I (= ring number in () above)
- Alpha = Dihedral Angle between Planes I and J (Deg)
- Beta = Angle Cg(I)-->Cg(J) or Cg(I)-->Me vector and normal to plane I (Deg)
- Gamma = Angle Cg(I)-->Cg(J) vector and normal to plane J (Deg)
- Cg-Cg = Distance between ring Centroids (Ang.)
- CgI\_Perp = Perpendicular distance of Cg(I) on ring J (Ang.)
- CgJ\_Perp = Perpendicular distance of Cg(J) on ring I (Ang.)

| Cg(I) | Cg(J) | [ARU(J)] | Cg-Cg    | Alpha    | Beta    | Gamma | CgI_Perp | CgJ_Perp   | Slippage   |
|-------|-------|----------|----------|----------|---------|-------|----------|------------|------------|
| Cg1   | Cg3   | [1555]   | 5,041(3) | 4,1526   | 75,6(3) | 5,3   | 76,6     | 1,1671(18) | 5,020(3)   |
| Cg1   | Cg5   | [3666]   | 4,795(3) | 0,4093   | 83,4(2) | 5,6   | 83,5     | 0,5461(18) | 4,773(2)   |
| Cg2   | Cg4   | [4464]   | 4,706(3) | -15,6374 | 49,7(2) | 26,8  | 24,1     | 4,2977(17) | 4,203(2)   |
| Cg2   | Cg5   | [3666]   | 5,876(3) | 0,4093   | 81,7(2) | 32,7  | 85,7     | 0,4434(17) | 4,943(2)   |
| Cg3   | Cg4   | [2656]   | 5,071(3) | 18,9973  | 60,1(3) | 51,9  | 8,8      | 5,011(3)   | 3,131(2)   |
| Cg3   | Cg4   | [4464]   | 4,731(3) | -15,6374 | 60,1(3) | 18,1  | 69,6     | 1,651(3)   | 4,497(2)   |
| Cg4   | Cg2   | [4565]   | 4,706(3) | -10,9702 | 49,7(2) | 24,1  | 26,8     | 4,203(2)   | 4,2977(17) |
| Cg4   | Cg3   | [2646]   | 5,072(3) | -11,0434 | 60,1(3) | 8,8   | 51,9     | 3,131(2)   | 5,012(3)   |
| Cg4   | Cg4   | [3767]   | 4,967(3) | -16,9276 | 0,0(2)  | 47,4  | 47,4     | 3,360(2)   | 3,360(2)   |
| Cg5   | Cg3   | [2646]   | 5,560(3) | -11,0434 | 61,7(3) | 28,4  | 80,1     | 0,953(2)   | 4,890(3)   |
| Cg5   | Cg5   | [3666]   | 3,754(3) | 0,4093   | 0,0(3)  | 19,3  | 19,3     | 3,543(2)   | 3,543(2)   |

|        |                     |
|--------|---------------------|
| [1555] | X,Y,Z               |
| [3666] | 1-X,1-Y,1-Z         |
| [4464] | -1/2+X,3/2-Y,-1/2+Z |
| [2656] | 3/2-X,1/2+Y,3/2-Z   |
| [4565] | 1/2+X,3/2-Y,1/2+Z   |
| [2646] | 3/2-X,-1/2+Y,3/2-Z  |
| [3767] | 2-X,1-Y,2-Z         |

**Analysis of X-H...Cg(Pi-Ring) Interactions (H..Cg < 3.0 Ang. - Gamma < 40.0 Deg)**

- Cg(J) = Center of gravity of ring J (Plane number above)
- H-Perp = Perpendicular distance of H to ring plane J
- Gamma = Angle between Cg-H vector and ring J normal
- X-H..Cg = X-H-Cg angle (degrees)
- X..Cg = Distance of X to Cg (Angstrom)
- X-H, Pi = Angle of the X-H bond with the Pi-plane (i.e. ' Perpendicular = 90 degrees, Parallel = 0 degrees)

| X--H(I) | Cg(J) | [ARU(J)] | H..Cg | H-Perp | Gamma | X-H..Cg | X..Cg    | X-H,Pi |
|---------|-------|----------|-------|--------|-------|---------|----------|--------|
| C22-H22 | Cg1   | [1555]   | 2,84  | 2,78   | 12,08 | 154     | 3,721(6) | 74     |
| C28-H28 | Cg3   | [4565]   | 2,8   | -2,78  | 6,8   | 134     | 3,526(5) | 47     |
| C39-H39 | Cg1   | [3666]   | 2,53  | -2,51  | 5,85  | 165     | 3,450(5) | 78     |

|        |                       |
|--------|-----------------------|
| [1555] | X,Y,Z                 |
| [4565] | $1/2+X, 3/2-Y, 1/2+Z$ |
| [3666] | $1-X, 1-Y, 1-Z$       |

The Cg(I) refer to the Ring Centre-of-Gravity numbers given in (I) in the Ring-Analysis above.

| Cg(I) | x           | y           | z           |
|-------|-------------|-------------|-------------|
| Cg1   | 0,42712(16) | 0,70649(7)  | 0,55013(12) |
| Cg2   | 0,73730(15) | 0,74206(7)  | 0,45353(12) |
| Cg3   | 0,4851(2)   | 0,88980(10) | 0,70805(17) |
| Cg4   | 1,13923(19) | 0,56914(8)  | 0,95723(15) |
| Cg5   | 0,5539(2)   | 0,46217(8)  | 0,60752(15) |

**Table S11:** Non-coordinative interactions in **10**.

6-Membered Ring (1) C5 --> C6 --> C7 --> C8 --> C9 --> C10 -->  
 6-Membered Ring (2) C15 --> C16 --> C17 --> C18 --> C19 --> C20 -->  
 6-Membered Ring (3) C25 --> C26 --> C27 --> C28 --> C29 --> C30 -->  
 6-Membered Ring (4) C35 --> C36 --> C37 --> C38 --> C39 --> C40 -->  
 6-Membered Ring (5) N1 --> C41 --> C42 --> C43 --> C44 --> C45 -->

**Analysis of Short Ring-Interactions with Cg-Cg Distances < 6.0 Ang., Alpha < 20.0 Deg. and Beta < 60.0 Deg.**

- Cg(I) = Plane number I (= ring number in () above)
- Alpha = Dihedral Angle between Planes I and J (Deg)
- Beta = Angle Cg(I)-->Cg(J) or Cg(I)-->Me vector and normal to plane I (Deg)
- Gamma = Angle Cg(I)-->Cg(J) vector and normal to plane J (Deg)
- Cg-Cg = Distance between ring Centroids (Ang.)
- CgI\_Perp = Perpendicular distance of Cg(I) on ring J (Ang.)
- CgJ\_Perp = Perpendicular distance of Cg(J) on ring I (Ang.)

| Cg(I) | Cg(J) | [ARU(J)] | Cg-Cg    | Alpha    | Beta    | Gamma | CgI_Perp | CgJ_Perp   | Slippage   |
|-------|-------|----------|----------|----------|---------|-------|----------|------------|------------|
| Cg1   | Cg3   | [4565]   | 4,818(3) | -14,3655 | 16,3(2) | 52,6  | 36,4     | 3,876(2)   | 2,9251(17) |
| Cg2   | Cg1   | [3766]   | 5,541(3) | -9,4776  | 47,9(2) | 35,9  | 81,3     | 0,8364(17) | 4,490(2)   |
| Cg2   | Cg3   | [2645]   | 5,034(2) | 2,968    | 59,8(2) | 21,1  | 47,7     | 3,3880(18) | 4,6981(18) |
| Cg2   | Cg4   | [4564]   | 5,810(2) | 8,2752   | 75,2(2) | 43,6  | 61,6     | 2,7622(17) | 4,2111(18) |
| Cg2   | Cg5   | [1655]   | 3,813(3) | 15,832   | 7,6(2)  | 19,5  | 16,5     | 3,6551(18) | 3,594(2)   |
| Cg3   | Cg1   | [4464]   | 4,819(3) | -19,0496 | 16,3(2) | 36,4  | 52,6     | 2,9251(18) | 3,876(2)   |
| Cg3   | Cg2   | [2655]   | 5,034(2) | 19,3611  | 59,8(2) | 47,7  | 21,1     | 4,6983(18) | 3,3881(18) |
| Cg3   | Cg4   | [4464]   | 5,103(2) | 7,4097   | 71,7(2) | 51,4  | 20,5     | 4,7787(17) | 3,1869(18) |
| Cg3   | Cg5   | [1555]   | 3,741(3) | 12,6296  | 7,1(2)  | 21,9  | 21,9     | 3,4710(18) | 3,472(2)   |
| Cg4   | Cg2   | [2655]   | 5,046(2) | 19,3611  | 75,2(2) | 15,3  | 73,5     | 1,4353(18) | 4,8675(17) |
| Cg4   | Cg3   | [4565]   | 5,103(2) | -14,3655 | 71,7(2) | 20,5  | 51,4     | 3,1872(18) | 4,7786(17) |
| Cg4   | Cg5   | [4565]   | 5,310(3) | -19,0286 | 69,9(2) | 23    | 87,9     | 0,1918(18) | 4,888(2)   |
| Cg5   | Cg2   | [1455]   | 3,813(3) | 7,9922   | 7,6(2)  | 16,5  | 19,5     | 3,594(2)   | 3,6552(18) |
| Cg5   | Cg3   | [1555]   | 3,741(3) | 15,5427  | 7,1(2)  | 21,9  | 21,9     | 3,472(2)   | 3,4709(18) |

|        |                     |        |                   |
|--------|---------------------|--------|-------------------|
| [4565] | 1/2+X,3/2-Y,1/2+Z   | [2655] | 3/2-X,1/2+Y,1/2-Z |
| [3766] | 2-X,1-Y,1-Z         | [1555] | X,Y,Z             |
| [2645] | 3/2-X,-1/2+Y,1/2-Z  | [4565] | 1/2+X,3/2-Y,1/2+Z |
| [4564] | 1/2+X,3/2-Y,-1/2+Z  | [1455] | -1+X,Y,Z          |
| [1655] | 1+X,Y,Z             | [1555] | X,Y,Z             |
| [4464] | -1/2+X,3/2-Y,-1/2+Z |        |                   |

The Cg(I) refer to the Ring Centre-of-Gravity numbers given in () in the Ring-Analysis above.

| Cg(I) | x         | y          | z           |
|-------|-----------|------------|-------------|
| Cg1   | 1,1673(2) | 0,59895(9) | 0,59492(12) |
| Cg2   | 1,1466(2) | 0,50522(8) | 0,25683(10) |
| Cg3   | 0,3081(2) | 0,79435(8) | 0,12923(10) |
| Cg4   | 0,6145(2) | 0,88926(8) | 0,46778(8)  |
| Cg5   | 0,2881(3) | 0,66441(8) | 0,25540(12) |

**Table S12.** Crystallographic data and processing parameters of **1 – 10**.

| Compound                               | <b>1</b>                                                        | <b>2</b>                                                                       | <b>3</b>                                                                       |
|----------------------------------------|-----------------------------------------------------------------|--------------------------------------------------------------------------------|--------------------------------------------------------------------------------|
| Empirical formula                      | C <sub>30</sub> H <sub>22</sub> F <sub>9</sub> LaO <sub>8</sub> | C <sub>42</sub> H <sub>30</sub> F <sub>9</sub> LaN <sub>2</sub> O <sub>8</sub> | C <sub>54</sub> H <sub>42</sub> F <sub>9</sub> LaN <sub>4</sub> O <sub>6</sub> |
| Formula mass                           | 820.38                                                          | 1000.59                                                                        | 1152.82                                                                        |
| System                                 | Orthorhombic                                                    | Orthorhombic                                                                   | Triclinic                                                                      |
| Space group                            | P 2 <sub>1</sub> 2 <sub>1</sub> 2 <sub>1</sub>                  | P b c a                                                                        | P-1                                                                            |
| a (Å)                                  | 10.8339(3)                                                      | 20.2785(8)                                                                     | 11.6736(4)                                                                     |
| b (Å)                                  | 12.9651(4)                                                      | 17.0836(7)                                                                     | 12.4587(5)                                                                     |
| c (Å)                                  | 23.2814(8)                                                      | 22.9223(10)                                                                    | 18.7838(8)                                                                     |
| α (°)                                  | 90                                                              | 90                                                                             | 93.397(2)                                                                      |
| β (°)                                  | 90                                                              | 90                                                                             | 95.696(2)                                                                      |
| γ (°)                                  | 90                                                              | 90                                                                             | 113.695(2)                                                                     |
| V (Å <sup>3</sup> )                    | 3270.17(18)                                                     | 8117.2(6)                                                                      | 2474.44(17)                                                                    |
| Z                                      | 4                                                               | 8                                                                              | 2                                                                              |
| T (K)                                  | 200(2)                                                          | 100(2)                                                                         | 100(2)                                                                         |
| μ (mm <sup>-1</sup> )                  | 1.404                                                           | 1.150                                                                          | 0.952                                                                          |
| D <sub>calc</sub> (Mg/m <sup>3</sup> ) | 1.666                                                           | 1.638                                                                          | 1.547                                                                          |
| θ max (°)                              | 30.115                                                          | 30.014                                                                         | 27.908                                                                         |
| Data collected                         | 214806                                                          | 245048                                                                         | 128758                                                                         |
| Unique refl. / R <sub>int</sub>        | 9556 / 0.0318                                                   | 11824 / 0.0280                                                                 | 11964 / 0.0478                                                                 |
| Parameters / Restraints                | 465 / 1                                                         | 599 / 48                                                                       | 671 / 0                                                                        |
| Goodness-of-Fit on F <sup>2</sup>      | 1.225                                                           | 1.053                                                                          | 1.041                                                                          |
| R1 / wR2 (all data)                    | 0.0302 / 0.0534                                                 | 0.0263 / 0.0601                                                                | 0.0313 / 0.0749                                                                |
| Residual extrema (e/Å <sup>3</sup> )   | 1.801 / -1.383                                                  | 0.567 / -0.449                                                                 | 1.394 / -1.565                                                                 |

**Table S12. Cont.**

| Compound                               | <b>4</b>                                                                       | <b>5</b>                                                                       | <b>6</b>                                                                       |
|----------------------------------------|--------------------------------------------------------------------------------|--------------------------------------------------------------------------------|--------------------------------------------------------------------------------|
| Empirical formula                      | C <sub>54</sub> H <sub>42</sub> F <sub>9</sub> LaN <sub>4</sub> O <sub>6</sub> | C <sub>45</sub> H <sub>29</sub> F <sub>9</sub> LaN <sub>3</sub> O <sub>6</sub> | C <sub>44</sub> H <sub>32</sub> F <sub>9</sub> LaN <sub>2</sub> O <sub>7</sub> |
| Formula mass                           | 1152.83                                                                        | 1017.62                                                                        | 1010.62                                                                        |
| System                                 | Monoclinic                                                                     | Tetragonal                                                                     | Triclinic                                                                      |
| Space group                            | P2 <sub>1</sub> /c                                                             | P <sub>4</sub> <sub>1</sub>                                                    | P-1                                                                            |
| a (Å)                                  | 14.2828(5)                                                                     | 10.5985(3)                                                                     | 10.0568(8)                                                                     |
| b (Å)                                  | 23.0917(9)                                                                     | 10.5985(3)                                                                     | 12.3260(10)                                                                    |
| c (Å)                                  | 15.3962(6)                                                                     | 38.1184(12)                                                                    | 17.9092(14)                                                                    |
| α (°)                                  | 90                                                                             | 90                                                                             | 77.756(5)                                                                      |
| β (°)                                  | 99.060(2)                                                                      | 90                                                                             | 79.585(5)                                                                      |
| γ (°)                                  | 90                                                                             | 90                                                                             | 75.818(5)                                                                      |
| V (Å <sup>3</sup> )                    | 5014.5(3)                                                                      | 4281.8(3)                                                                      | 2083.9(3)                                                                      |
| Z                                      | 4                                                                              | 4                                                                              | 2                                                                              |
| T (K)                                  | 100(2)                                                                         | 100(2)                                                                         | 100(2)                                                                         |
| μ (mm <sup>-1</sup> )                  | 0.940                                                                          | 1.089                                                                          | 1.119                                                                          |
| D <sub>calc</sub> (Mg/m <sup>3</sup> ) | 1.527                                                                          | 1.579                                                                          | 1.611                                                                          |
| θ max (°)                              | 27.999                                                                         | 33.162                                                                         | 33.175                                                                         |
| Data collected                         | 12101                                                                          | 16324                                                                          | 15742                                                                          |
| Unique refl. / R <sub>int</sub>        | 8659 / 0.1097                                                                  | 15859 / 0.0833                                                                 | 11445 / 0.0903                                                                 |
| Parameters / Restraints                | 690 / 12                                                                       | 578 / 1                                                                        | 650 / 42                                                                       |
| Goodness-of-Fit on F <sup>2</sup>      | 1.012                                                                          | 1.249                                                                          | 1.013                                                                          |
| R1 / wR2 (all data)                    | 0.0338 / 0.0694                                                                | 0.0353 / 0.0740                                                                | 0.0442 / 0.0850                                                                |
| Residual extrema (e/Å <sup>3</sup> )   | 0.832 / -0.842                                                                 | 1.015 / -2.032                                                                 | 1.015 / -2.032                                                                 |

**Table S12. cont.**

| Compound                               | <b>7</b>                                                                       | <b>8</b>                                                                       |
|----------------------------------------|--------------------------------------------------------------------------------|--------------------------------------------------------------------------------|
| Empirical formula                      | C <sub>44</sub> H <sub>36</sub> F <sub>9</sub> LaN <sub>2</sub> O <sub>7</sub> | C <sub>43</sub> H <sub>31</sub> F <sub>9</sub> LaN <sub>3</sub> O <sub>7</sub> |
| Formula mass                           | 1014.66                                                                        | 1011.62                                                                        |
| System                                 | Triclinic                                                                      | Triclinic                                                                      |
| Space group                            | P-1                                                                            | P-1                                                                            |
| a (Å)                                  | 11.5915(4)                                                                     | 11.2215(14)                                                                    |
| b (Å)                                  | 11.9970(4)                                                                     | 13.5211(16)                                                                    |
| c (Å)                                  | 17.0947(6)                                                                     | 15.2503(19)                                                                    |
| α (°)                                  | 101.329(2)                                                                     | 65.583(6)                                                                      |
| β (°)                                  | 106.027(2)                                                                     | 78.991(7)                                                                      |
| γ (°)                                  | 104.460(2)                                                                     | 81.622(6)                                                                      |
| V (Å <sup>3</sup> )                    | 2120.61(13)                                                                    | 2062.4(5)                                                                      |
| Z                                      | 2                                                                              | 2                                                                              |
| T (K)                                  | 100(2)                                                                         | 100(2)                                                                         |
| μ (mm <sup>-1</sup> )                  | 1.100                                                                          | 1.131                                                                          |
| D <sub>calc</sub> (Mg/m <sup>3</sup> ) | 1.589                                                                          | 1.629                                                                          |
| θ max (°)                              | 30.238                                                                         | 26.999                                                                         |
| Data collected                         | 85423                                                                          | 59257                                                                          |
| Unique refl. / R <sub>int</sub>        | 12494 / 0.0369                                                                 | 8988 / 0.0592                                                                  |
| Parameters / Restraints                | 574 / 9                                                                        | 572 / 3                                                                        |
| Goodness-of-Fit on F <sup>2</sup>      | 1.099                                                                          | 1.042                                                                          |
| R1 / wR2 (all data)                    | 0.0368 / 0.849                                                                 | 0.0379 / 0.0827                                                                |
| Residual extrema (e/Å <sup>3</sup> )   | 1.225 / -1.533                                                                 | 1.439 / -1.565                                                                 |

**Table S12. cont.**

| Compound                               | <b>9</b>                                                                        | <b>10</b>                                                         |
|----------------------------------------|---------------------------------------------------------------------------------|-------------------------------------------------------------------|
| Empirical formula                      | C <sub>42</sub> H <sub>30</sub> F <sub>9</sub> N <sub>2</sub> O <sub>6</sub> Tb | C <sub>45</sub> H <sub>30</sub> EuF <sub>12</sub> NO <sub>8</sub> |
| Formula mass                           | 988.60                                                                          | 1092.66                                                           |
| System                                 | Monoclinic                                                                      | Monoclinic                                                        |
| Space group                            | P2 <sub>1</sub> /n                                                              | P2 <sub>1</sub> /n                                                |
| a (Å)                                  | 11.1935(4)                                                                      | 11.1009(6)                                                        |
| b (Å)                                  | 24.2208(7)                                                                      | 21.8025(12)                                                       |
| c (Å)                                  | 15.5561(5)                                                                      | 18.7796(11)                                                       |
| $\alpha$ (°)                           | 90                                                                              | 90                                                                |
| $\beta$ (°)                            | 103.7180(10)                                                                    | 106.930(3)                                                        |
| $\gamma$ (°)                           | 90                                                                              | 90                                                                |
| V (Å <sup>3</sup> )                    | 4097.2(2)                                                                       | 4348.2(4)                                                         |
| Z                                      | 4                                                                               | 4                                                                 |
| T (K)                                  | 100(2)                                                                          | 100(2)                                                            |
| $\mu$ (mm <sup>-1</sup> )              | 1.816                                                                           | 1.549                                                             |
| D <sub>calc</sub> (Mg/m <sup>3</sup> ) | 1.603                                                                           | 1.669                                                             |
| $\theta$ max (°)                       | 23.857                                                                          | 27.532                                                            |
| Data collected                         | 79220                                                                           | 20270                                                             |
| Unique refl. / R <sub>int</sub>        | 6314 / 0.0151                                                                   | 8405 / 0.1708                                                     |
| Parameters / Restraints                | 547 / 21                                                                        | 484 / 7                                                           |
| Goodness-of-Fit on F <sup>2</sup>      | 1.144                                                                           | 1.012                                                             |
| R1 / wR2 (all data)                    | 0.0323 / 0.0736                                                                 | 0.0702 / 0.1476                                                   |
| Residual extrema (e/Å <sup>3</sup> )   | 1.250 / -1.358                                                                  | 1.424 / -1.055                                                    |

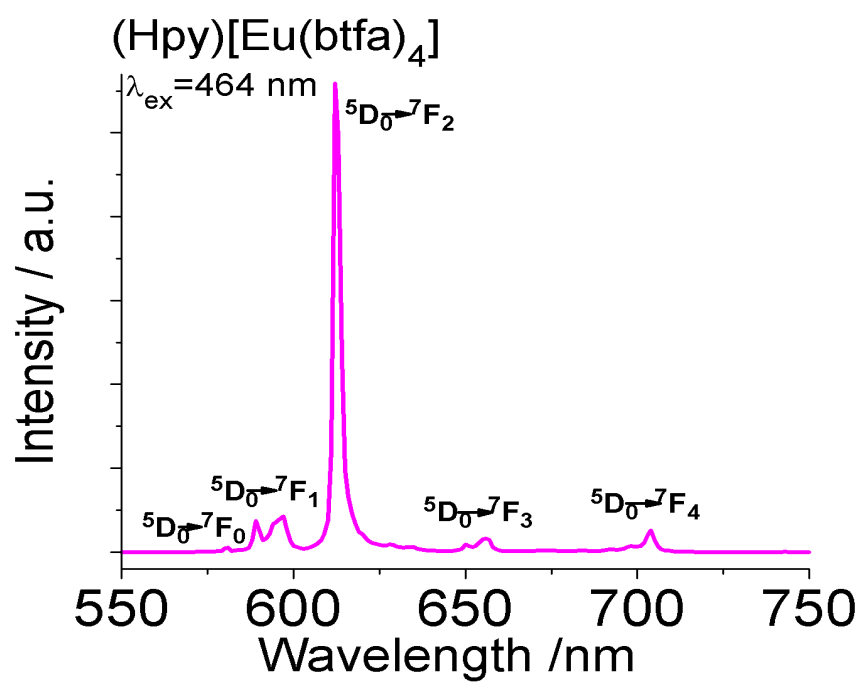

**Figure S21:** Emission spectrum of **10** measured at the 464 nm excitation wavelength.
