# Supplementary material
Source: MDPI journal article supplement (https://www.mdpi.com/2304-6740/9/10/74)
Supplement: s1 [file s1 › mo_IALVB88_0m(10)_aa.pdf]

**Table S1.** Crystal data and structure refinement for Complex **10** mo\_IALVB88\_0m\_aa.

|                                 |                                 |                 |  |
|---------------------------------|---------------------------------|-----------------|--|
| Identification code             | mo_IALVB88_0m_aa                |                 |  |
| Empirical formula               | C45 H30 Eu F12 N O8             |                 |  |
| Formula weight                  | 1092.66                         |                 |  |
| Temperature                     | 100(2) K                        |                 |  |
| Wavelength                      | 0.71073 Å                       |                 |  |
| Crystal system                  | Monoclinic                      |                 |  |
| Space group                     | P 21/n                          |                 |  |
| Unit cell dimensions            | a = 11.1009(6) Å                | α= 90°.         |  |
|                                 | b = 21.8025(12) Å               | β= 106.930(3)°. |  |
|                                 | c = 18.7796(11) Å               | γ= 90°.         |  |
| Volume                          | 4348.2(4) Å³                    |                 |  |
| Z                               | 4                               |                 |  |
| Density (calculated)            | 1.669 Mg/m³                     |                 |  |
| Absorption coefficient          | 1.549 mm⁻¹                      |                 |  |
| F(000)                          | 2168                            |                 |  |
| Crystal size                    | 0.295 x 0.079 x 0.038 mm³       |                 |  |
| Theta range for data collection | 2.267 to 24.999°.               |                 |  |
| Index ranges                    | -12<=h<=12, 0<=k<=25, 0<=l<=22  |                 |  |
| Reflections collected           | 6112                            |                 |  |
| Independent reflections         | 6112 [R(int) = 0.1366]          |                 |  |
| Completeness to theta = 24.999° | 80.0 %                          |                 |  |
| Absorption correction           | Semi-empirical from equivalents |                 |  |
| Max. and min. transmission      | 0.7461 and 0.4731               |                 |  |
| Refinement method               | Full-matrix least-squares on F² |                 |  |
| Data / restraints / parameters  | 6112 / 1 / 568                  |                 |  |
| Goodness-of-fit on F²           | 0.832                           |                 |  |
| Final R indices [I>2sigma(I)]   | R1 = 0.0324, wR2 = 0.0438       |                 |  |
| R indices (all data)            | R1 = 0.0824, wR2 = 0.0505       |                 |  |
| Extinction coefficient          | n/a                             |                 |  |
| Largest diff. peak and hole     | 1.069 and -0.807 e.Å⁻³          |                 |  |

**Table S2.** Atomic coordinates ( $\times 10^4$ ) and equivalent isotropic displacement parameters ( $\text{\AA}^2 \times 10^3$ ) for mo\_IALVB88\_0m\_aa. U(eq) is defined as one third of the trace of the orthogonalized  $U^{ij}$  tensor.

|       | x        | y       | z       | U(eq) |
|-------|----------|---------|---------|-------|
| Eu(1) | 7927(1)  | 6864(1) | 3143(1) | 15(1) |
| F(1)  | 5397(3)  | 5274(1) | 3769(2) | 36(1) |
| F(2)  | 5141(3)  | 5903(1) | 4591(2) | 36(1) |
| F(3)  | 6334(3)  | 5112(1) | 4927(2) | 41(1) |
| F(4)  | 5092(4)  | 5957(2) | 894(2)  | 67(2) |
| F(5)  | 4784(5)  | 5253(2) | 1601(2) | 86(2) |
| F(6)  | 5860(3)  | 5072(1) | 853(2)  | 41(1) |
| F(7)  | 7402(4)  | 7339(1) | 63(2)   | 45(1) |
| F(8)  | 9215(4)  | 7358(2) | 859(2)  | 56(1) |
| F(9)  | 8212(4)  | 6511(2) | 602(2)  | 58(2) |
| F(10) | 10542(4) | 8741(2) | 2832(2) | 69(2) |
| F(11) | 11804(3) | 8150(1) | 3582(1) | 34(1) |
| F(12) | 11228(4) | 8949(2) | 4003(2) | 69(2) |
| O(1)  | 6729(3)  | 6359(1) | 3835(2) | 19(1) |
| O(2)  | 9342(3)  | 6586(1) | 4335(2) | 16(1) |
| O(3)  | 6536(3)  | 6113(1) | 2328(2) | 19(1) |
| O(4)  | 9134(3)  | 6022(1) | 2977(2) | 19(1) |
| O(5)  | 8252(3)  | 7042(1) | 1971(2) | 20(1) |
| O(6)  | 6124(3)  | 7385(1) | 2407(2) | 18(1) |
| O(7)  | 9556(3)  | 7613(1) | 3347(2) | 18(1) |
| O(8)  | 7423(3)  | 7666(1) | 3851(2) | 17(1) |
| C(1)  | 6020(7)  | 5550(3) | 4408(3) | 28(2) |
| C(2)  | 7082(6)  | 5940(2) | 4327(3) | 17(2) |
| C(3)  | 8266(5)  | 5813(2) | 4783(3) | 20(2) |
| C(4)  | 9342(5)  | 6176(2) | 4799(3) | 18(2) |
| C(5)  | 10563(6) | 6063(2) | 5393(3) | 22(2) |
| C(6)  | 10533(6) | 5867(2) | 6109(3) | 36(2) |
| C(7)  | 11679(7) | 5794(3) | 6657(3) | 47(3) |
| C(8)  | 12780(7) | 5908(3) | 6491(4) | 46(3) |
| C(9)  | 12817(7) | 6114(2) | 5797(3) | 44(3) |
| C(10) | 11668(6) | 6193(2) | 5248(3) | 29(2) |
| C(11) | 5624(7)  | 5488(3) | 1323(3) | 35(2) |

|       |          |         |         |       |
|-------|----------|---------|---------|-------|
| C(12) | 6796(5)  | 5708(2) | 1912(3) | 16(2) |
| C(13) | 7923(5)  | 5455(2) | 1945(3) | 15(2) |
| C(14) | 9105(5)  | 5621(2) | 2491(2) | 12(2) |
| C(15) | 10287(5) | 5301(2) | 2516(3) | 12(2) |
| C(16) | 10495(6) | 4982(2) | 1914(3) | 21(2) |
| C(17) | 11635(6) | 4748(2) | 1972(3) | 28(2) |
| C(18) | 12666(6) | 4813(2) | 2616(3) | 23(2) |
| C(19) | 12434(6) | 5114(2) | 3220(3) | 23(2) |
| C(20) | 11278(5) | 5356(2) | 3173(3) | 20(2) |
| C(21) | 8080(7)  | 7116(3) | 715(3)  | 29(2) |
| C(22) | 7503(6)  | 7202(2) | 1346(3) | 19(1) |
| C(23) | 6278(6)  | 7402(2) | 1182(3) | 19(1) |
| C(24) | 5655(5)  | 7491(2) | 1718(3) | 12(2) |
| C(25) | 4312(5)  | 7729(2) | 1488(3) | 16(2) |
| C(26) | 3513(6)  | 7645(2) | 758(3)  | 21(2) |
| C(27) | 2291(6)  | 7855(2) | 583(3)  | 25(2) |
| C(28) | 1856(6)  | 8155(2) | 1103(3) | 32(2) |
| C(29) | 2658(5)  | 8251(2) | 1816(3) | 30(2) |
| C(30) | 3862(6)  | 8025(2) | 2008(3) | 21(2) |
| C(31) | 10797(7) | 8492(3) | 3503(4) | 35(2) |
| C(32) | 9674(6)  | 8147(3) | 3601(2) | 23(2) |
| C(33) | 8904(6)  | 8458(2) | 3927(3) | 26(2) |
| C(34) | 7774(5)  | 8212(2) | 4028(2) | 16(2) |
| C(35) | 6945(6)  | 8579(2) | 4357(2) | 19(2) |
| C(36) | 7376(6)  | 9109(2) | 4789(2) | 17(2) |
| C(37) | 6562(6)  | 9404(2) | 5109(3) | 24(2) |
| C(38) | 5348(6)  | 9192(2) | 5010(3) | 27(2) |
| C(39) | 4922(6)  | 8685(2) | 4557(2) | 23(2) |
| C(40) | 5720(6)  | 8387(2) | 4245(3) | 16(2) |
| N(1)  | 3954(6)  | 6660(2) | 3143(3) | 50(1) |
| C(41) | 3967(7)  | 6446(2) | 2471(3) | 50(1) |
| C(42) | 2958(7)  | 6431(2) | 1921(4) | 50(1) |
| C(43) | 1909(8)  | 6613(2) | 1983(4) | 50(1) |
| C(44) | 1791(7)  | 6833(3) | 2569(3) | 50(1) |
| C(45) | 2701(6)  | 6882(3) | 3240(3) | 50(1) |

---

**Table S3.** Bond lengths [Å] and angles [°] for mo\_IALVB88\_0m\_aa.

---

|             |          |
|-------------|----------|
| Eu(1)-O(4)  | 2.347(3) |
| Eu(1)-O(8)  | 2.360(3) |
| Eu(1)-O(5)  | 2.364(4) |
| Eu(1)-O(6)  | 2.366(3) |
| Eu(1)-O(1)  | 2.381(4) |
| Eu(1)-O(7)  | 2.384(3) |
| Eu(1)-O(2)  | 2.408(3) |
| Eu(1)-O(3)  | 2.455(3) |
| F(1)-C(1)   | 1.341(5) |
| F(2)-C(1)   | 1.363(8) |
| F(3)-C(1)   | 1.337(5) |
| F(4)-C(11)  | 1.329(6) |
| F(5)-C(11)  | 1.299(9) |
| F(6)-C(11)  | 1.344(7) |
| F(7)-C(21)  | 1.329(6) |
| F(8)-C(21)  | 1.318(8) |
| F(9)-C(21)  | 1.353(6) |
| F(10)-C(31) | 1.324(7) |
| F(11)-C(31) | 1.315(7) |
| F(12)-C(31) | 1.359(6) |
| O(1)-C(2)   | 1.278(5) |
| O(2)-C(4)   | 1.248(5) |
| O(3)-C(12)  | 1.268(6) |
| O(4)-C(14)  | 1.258(5) |
| O(5)-C(22)  | 1.275(5) |
| O(6)-C(24)  | 1.267(5) |
| O(7)-C(32)  | 1.249(6) |
| O(8)-C(34)  | 1.267(5) |
| C(1)-C(2)   | 1.496(9) |
| C(2)-C(3)   | 1.371(6) |
| C(3)-C(4)   | 1.426(8) |
| C(3)-H(3)   | 0.9500   |
| C(4)-C(5)   | 1.504(6) |
| C(5)-C(10)  | 1.361(9) |

|             |           |
|-------------|-----------|
| C(5)-C(6)   | 1.420(8)  |
| C(6)-C(7)   | 1.393(7)  |
| C(6)-H(6)   | 0.9500    |
| C(7)-C(8)   | 1.368(11) |
| C(7)-H(7)   | 0.9500    |
| C(8)-C(9)   | 1.392(9)  |
| C(8)-H(8)   | 0.9500    |
| C(9)-C(10)  | 1.398(7)  |
| C(9)-H(9)   | 0.9500    |
| C(10)-H(10) | 0.9500    |
| C(11)-C(12) | 1.519(7)  |
| C(12)-C(13) | 1.353(8)  |
| C(13)-C(14) | 1.456(6)  |
| C(13)-H(13) | 0.9500    |
| C(14)-C(15) | 1.475(8)  |
| C(15)-C(20) | 1.399(6)  |
| C(15)-C(16) | 1.401(7)  |
| C(16)-C(17) | 1.339(8)  |
| C(16)-H(16) | 0.9500    |
| C(17)-C(18) | 1.409(6)  |
| C(17)-H(17) | 0.9500    |
| C(18)-C(19) | 1.398(7)  |
| C(18)-H(18) | 0.9500    |
| C(19)-C(20) | 1.367(8)  |
| C(19)-H(19) | 0.9500    |
| C(20)-H(20) | 0.9500    |
| C(21)-C(22) | 1.513(10) |
| C(22)-C(23) | 1.375(9)  |
| C(23)-C(24) | 1.392(8)  |
| C(23)-H(23) | 0.9500    |
| C(24)-C(25) | 1.517(6)  |
| C(25)-C(30) | 1.380(8)  |
| C(25)-C(26) | 1.410(5)  |
| C(26)-C(27) | 1.378(9)  |
| C(26)-H(26) | 0.9500    |
| C(27)-C(28) | 1.374(8)  |

|                 |           |
|-----------------|-----------|
| C(27)-H(27)     | 0.9500    |
| C(28)-C(29)     | 1.392(5)  |
| C(28)-H(28)     | 0.9500    |
| C(29)-C(30)     | 1.370(8)  |
| C(29)-H(29)     | 0.9500    |
| C(30)-H(30)     | 0.9500    |
| C(31)-C(32)     | 1.512(10) |
| C(32)-C(33)     | 1.368(9)  |
| C(33)-C(34)     | 1.426(9)  |
| C(33)-H(33)     | 0.9500    |
| C(34)-C(35)     | 1.483(8)  |
| C(35)-C(40)     | 1.379(8)  |
| C(35)-C(36)     | 1.413(6)  |
| C(36)-C(37)     | 1.381(8)  |
| C(36)-H(36)     | 0.9500    |
| C(37)-C(38)     | 1.386(9)  |
| C(37)-H(37)     | 0.9500    |
| C(38)-C(39)     | 1.389(6)  |
| C(38)-H(38)     | 0.9500    |
| C(39)-C(40)     | 1.362(8)  |
| C(39)-H(39)     | 0.9500    |
| C(40)-H(40)     | 0.9500    |
| N(1)-C(41)      | 1.350(8)  |
| N(1)-C(45)      | 1.533(9)  |
| N(1)-H(1A)      | 0.8800    |
| C(41)-C(42)     | 1.284(7)  |
| C(41)-H(41)     | 0.9500    |
| C(42)-C(43)     | 1.267(11) |
| C(42)-H(42)     | 0.9500    |
| C(43)-C(44)     | 1.242(9)  |
| C(43)-H(43)     | 0.9500    |
| C(44)-C(45)     | 1.371(6)  |
| C(44)-H(44)     | 0.9500    |
| C(45)-H(45)     | 0.9500    |
| O(4)-Eu(1)-O(8) | 153.22(9) |

|                  |            |
|------------------|------------|
| O(4)-Eu(1)-O(5)  | 75.95(11)  |
| O(8)-Eu(1)-O(5)  | 121.84(10) |
| O(4)-Eu(1)-O(6)  | 135.81(10) |
| O(8)-Eu(1)-O(6)  | 70.97(10)  |
| O(5)-Eu(1)-O(6)  | 73.12(12)  |
| O(4)-Eu(1)-O(1)  | 98.17(13)  |
| O(8)-Eu(1)-O(1)  | 76.94(12)  |
| O(5)-Eu(1)-O(1)  | 147.63(10) |
| O(6)-Eu(1)-O(1)  | 91.65(12)  |
| O(4)-Eu(1)-O(7)  | 96.98(13)  |
| O(8)-Eu(1)-O(7)  | 72.23(13)  |
| O(5)-Eu(1)-O(7)  | 73.89(11)  |
| O(6)-Eu(1)-O(7)  | 103.76(11) |
| O(1)-Eu(1)-O(7)  | 138.33(10) |
| O(4)-Eu(1)-O(2)  | 71.53(11)  |
| O(8)-Eu(1)-O(2)  | 82.00(10)  |
| O(5)-Eu(1)-O(2)  | 132.21(13) |
| O(6)-Eu(1)-O(2)  | 151.16(12) |
| O(1)-Eu(1)-O(2)  | 72.14(12)  |
| O(7)-Eu(1)-O(2)  | 76.36(10)  |
| O(4)-Eu(1)-O(3)  | 71.06(11)  |
| O(8)-Eu(1)-O(3)  | 129.49(13) |
| O(5)-Eu(1)-O(3)  | 76.58(12)  |
| O(6)-Eu(1)-O(3)  | 71.62(10)  |
| O(1)-Eu(1)-O(3)  | 71.49(11)  |
| O(7)-Eu(1)-O(3)  | 150.09(12) |
| O(2)-Eu(1)-O(3)  | 122.22(10) |
| C(2)-O(1)-Eu(1)  | 128.5(4)   |
| C(4)-O(2)-Eu(1)  | 134.2(3)   |
| C(12)-O(3)-Eu(1) | 129.4(4)   |
| C(14)-O(4)-Eu(1) | 138.2(3)   |
| C(22)-O(5)-Eu(1) | 131.9(4)   |
| C(24)-O(6)-Eu(1) | 135.2(3)   |
| C(32)-O(7)-Eu(1) | 133.6(4)   |
| C(34)-O(8)-Eu(1) | 137.7(4)   |
| F(3)-C(1)-F(1)   | 106.8(4)   |

|                  |          |
|------------------|----------|
| F(3)-C(1)-F(2)   | 105.9(6) |
| F(1)-C(1)-F(2)   | 105.0(5) |
| F(3)-C(1)-C(2)   | 115.7(5) |
| F(1)-C(1)-C(2)   | 112.3(5) |
| F(2)-C(1)-C(2)   | 110.4(5) |
| O(1)-C(2)-C(3)   | 129.2(5) |
| O(1)-C(2)-C(1)   | 113.3(4) |
| C(3)-C(2)-C(1)   | 117.5(5) |
| C(2)-C(3)-C(4)   | 123.1(5) |
| C(2)-C(3)-H(3)   | 118.5    |
| C(4)-C(3)-H(3)   | 118.5    |
| O(2)-C(4)-C(3)   | 123.6(4) |
| O(2)-C(4)-C(5)   | 116.9(5) |
| C(3)-C(4)-C(5)   | 119.5(5) |
| C(10)-C(5)-C(6)  | 121.5(5) |
| C(10)-C(5)-C(4)  | 119.2(5) |
| C(6)-C(5)-C(4)   | 119.2(7) |
| C(7)-C(6)-C(5)   | 117.7(7) |
| C(7)-C(6)-H(6)   | 121.1    |
| C(5)-C(6)-H(6)   | 121.1    |
| C(8)-C(7)-C(6)   | 119.7(7) |
| C(8)-C(7)-H(7)   | 120.1    |
| C(6)-C(7)-H(7)   | 120.1    |
| C(7)-C(8)-C(9)   | 122.9(6) |
| C(7)-C(8)-H(8)   | 118.5    |
| C(9)-C(8)-H(8)   | 118.5    |
| C(8)-C(9)-C(10)  | 117.4(8) |
| C(8)-C(9)-H(9)   | 121.3    |
| C(10)-C(9)-H(9)  | 121.3    |
| C(5)-C(10)-C(9)  | 120.6(6) |
| C(5)-C(10)-H(10) | 119.7    |
| C(9)-C(10)-H(10) | 119.7    |
| F(5)-C(11)-F(4)  | 107.6(7) |
| F(5)-C(11)-F(6)  | 107.3(5) |
| F(4)-C(11)-F(6)  | 105.0(5) |
| F(5)-C(11)-C(12) | 113.2(6) |

|                   |          |
|-------------------|----------|
| F(4)-C(11)-C(12)  | 109.5(5) |
| F(6)-C(11)-C(12)  | 113.7(6) |
| O(3)-C(12)-C(13)  | 129.0(4) |
| O(3)-C(12)-C(11)  | 111.7(5) |
| C(13)-C(12)-C(11) | 119.3(5) |
| C(12)-C(13)-C(14) | 124.3(5) |
| C(12)-C(13)-H(13) | 117.9    |
| C(14)-C(13)-H(13) | 117.9    |
| O(4)-C(14)-C(13)  | 120.7(5) |
| O(4)-C(14)-C(15)  | 118.1(4) |
| C(13)-C(14)-C(15) | 121.1(4) |
| C(20)-C(15)-C(16) | 118.9(5) |
| C(20)-C(15)-C(14) | 116.8(5) |
| C(16)-C(15)-C(14) | 124.2(4) |
| C(17)-C(16)-C(15) | 119.8(5) |
| C(17)-C(16)-H(16) | 120.1    |
| C(15)-C(16)-H(16) | 120.1    |
| C(16)-C(17)-C(18) | 122.9(6) |
| C(16)-C(17)-H(17) | 118.5    |
| C(18)-C(17)-H(17) | 118.5    |
| C(19)-C(18)-C(17) | 116.6(6) |
| C(19)-C(18)-H(18) | 121.7    |
| C(17)-C(18)-H(18) | 121.7    |
| C(20)-C(19)-C(18) | 121.3(5) |
| C(20)-C(19)-H(19) | 119.3    |
| C(18)-C(19)-H(19) | 119.3    |
| C(19)-C(20)-C(15) | 120.4(5) |
| C(19)-C(20)-H(20) | 119.8    |
| C(15)-C(20)-H(20) | 119.8    |
| F(8)-C(21)-F(7)   | 107.1(6) |
| F(8)-C(21)-F(9)   | 106.3(7) |
| F(7)-C(21)-F(9)   | 105.6(5) |
| F(8)-C(21)-C(22)  | 112.8(5) |
| F(7)-C(21)-C(22)  | 114.9(6) |
| F(9)-C(21)-C(22)  | 109.6(5) |
| O(5)-C(22)-C(23)  | 129.1(6) |

|                   |          |
|-------------------|----------|
| O(5)-C(22)-C(21)  | 112.1(6) |
| C(23)-C(22)-C(21) | 118.7(5) |
| C(22)-C(23)-C(24) | 123.3(5) |
| C(22)-C(23)-H(23) | 118.3    |
| C(24)-C(23)-H(23) | 118.3    |
| O(6)-C(24)-C(23)  | 124.8(5) |
| O(6)-C(24)-C(25)  | 115.5(5) |
| C(23)-C(24)-C(25) | 119.7(4) |
| C(30)-C(25)-C(26) | 119.5(5) |
| C(30)-C(25)-C(24) | 119.1(4) |
| C(26)-C(25)-C(24) | 121.4(5) |
| C(27)-C(26)-C(25) | 119.1(6) |
| C(27)-C(26)-H(26) | 120.5    |
| C(25)-C(26)-H(26) | 120.5    |
| C(28)-C(27)-C(26) | 120.9(5) |
| C(28)-C(27)-H(27) | 119.5    |
| C(26)-C(27)-H(27) | 119.5    |
| C(27)-C(28)-C(29) | 119.8(6) |
| C(27)-C(28)-H(28) | 120.1    |
| C(29)-C(28)-H(28) | 120.1    |
| C(30)-C(29)-C(28) | 120.0(6) |
| C(30)-C(29)-H(29) | 120.0    |
| C(28)-C(29)-H(29) | 120.0    |
| C(29)-C(30)-C(25) | 120.6(5) |
| C(29)-C(30)-H(30) | 119.7    |
| C(25)-C(30)-H(30) | 119.7    |
| F(11)-C(31)-F(10) | 106.2(7) |
| F(11)-C(31)-F(12) | 102.7(5) |
| F(10)-C(31)-F(12) | 106.9(5) |
| F(11)-C(31)-C(32) | 114.1(5) |
| F(10)-C(31)-C(32) | 111.4(5) |
| F(12)-C(31)-C(32) | 114.7(6) |
| O(7)-C(32)-C(33)  | 128.5(6) |
| O(7)-C(32)-C(31)  | 114.6(6) |
| C(33)-C(32)-C(31) | 116.9(6) |
| C(32)-C(33)-C(34) | 124.2(6) |

|                   |          |
|-------------------|----------|
| C(32)-C(33)-H(33) | 117.9    |
| C(34)-C(33)-H(33) | 117.9    |
| O(8)-C(34)-C(33)  | 122.2(6) |
| O(8)-C(34)-C(35)  | 115.8(6) |
| C(33)-C(34)-C(35) | 122.1(5) |
| C(40)-C(35)-C(36) | 119.4(6) |
| C(40)-C(35)-C(34) | 118.5(5) |
| C(36)-C(35)-C(34) | 122.2(6) |
| C(37)-C(36)-C(35) | 118.4(6) |
| C(37)-C(36)-H(36) | 120.8    |
| C(35)-C(36)-H(36) | 120.8    |
| C(36)-C(37)-C(38) | 121.3(5) |
| C(36)-C(37)-H(37) | 119.4    |
| C(38)-C(37)-H(37) | 119.4    |
| C(37)-C(38)-C(39) | 119.5(6) |
| C(37)-C(38)-H(38) | 120.3    |
| C(39)-C(38)-H(38) | 120.3    |
| C(40)-C(39)-C(38) | 119.7(6) |
| C(40)-C(39)-H(39) | 120.2    |
| C(38)-C(39)-H(39) | 120.2    |
| C(39)-C(40)-C(35) | 121.7(5) |
| C(39)-C(40)-H(40) | 119.2    |
| C(35)-C(40)-H(40) | 119.2    |
| C(41)-N(1)-C(45)  | 118.5(6) |
| C(41)-N(1)-H(1A)  | 120.7    |
| C(45)-N(1)-H(1A)  | 120.7    |
| C(42)-C(41)-N(1)  | 121.1(8) |
| C(42)-C(41)-H(41) | 119.5    |
| N(1)-C(41)-H(41)  | 119.5    |
| C(43)-C(42)-C(41) | 121.9(8) |
| C(43)-C(42)-H(42) | 119.1    |
| C(41)-C(42)-H(42) | 119.1    |
| C(44)-C(43)-C(42) | 122.6(8) |
| C(44)-C(43)-H(43) | 118.7    |
| C(42)-C(43)-H(43) | 118.7    |
| C(43)-C(44)-C(45) | 127.2(8) |

|                   |          |
|-------------------|----------|
| C(43)-C(44)-H(44) | 116.4    |
| C(45)-C(44)-H(44) | 116.4    |
| C(44)-C(45)-N(1)  | 108.5(5) |
| C(44)-C(45)-H(45) | 125.7    |
| N(1)-C(45)-H(45)  | 125.7    |

---

Symmetry transformations used to generate equivalent atoms:

**Table S4.** Anisotropic displacement parameters ( $\text{\AA}^2 \times 10^3$ ) for mo\_IALVB88\_0m\_aa. The anisotropic displacement factor exponent takes the form:  $-2\pi^2 [h^2 a^{*2} U^{11} + \dots + 2 h k a^* b^* U^{12}]$ .

|       | $U^{11}$ | $U^{22}$ | $U^{33}$ | $U^{23}$ | $U^{13}$ | $U^{12}$ |
|-------|----------|----------|----------|----------|----------|----------|
| Eu(1) | 11(1)    | 16(1)    | 18(1)    | -1(1)    | 7(1)     | 0(1)     |
| F(1)  | 33(3)    | 34(2)    | 42(2)    | -4(2)    | 9(2)     | -9(2)    |
| F(2)  | 33(3)    | 40(2)    | 39(2)    | 4(2)     | 15(2)    | -3(2)    |
| F(3)  | 32(3)    | 37(2)    | 54(2)    | 15(2)    | 10(2)    | -6(2)    |
| F(4)  | 52(4)    | 57(3)    | 71(3)    | -10(2)   | -17(3)   | 9(2)     |
| F(5)  | 66(5)    | 104(4)   | 90(3)    | -42(3)   | 26(3)    | -36(3)   |
| F(6)  | 24(3)    | 49(2)    | 48(2)    | -20(2)   | 4(2)     | -1(2)    |
| F(7)  | 43(3)    | 61(2)    | 33(2)    | 4(2)     | 16(2)    | 5(2)     |
| F(8)  | 43(4)    | 82(3)    | 50(2)    | 0(2)     | 23(2)    | -7(2)    |
| F(9)  | 78(4)    | 50(3)    | 61(2)    | -4(2)    | 44(2)    | 11(2)    |
| F(10) | 29(4)    | 104(3)   | 81(3)    | 51(2)    | 25(3)    | 1(2)     |
| F(11) | 19(2)    | 44(2)    | 40(2)    | 4(2)     | 12(2)    | -4(2)    |
| F(12) | 56(4)    | 62(3)    | 104(3)   | -25(2)   | 45(3)    | -15(2)   |
| O(1)  | 15(3)    | 17(2)    | 25(2)    | 2(2)     | 7(2)     | 2(2)     |
| O(2)  | 13(3)    | 21(2)    | 16(2)    | 1(2)     | 9(2)     | -5(2)    |
| O(3)  | 14(3)    | 17(2)    | 24(2)    | -6(2)    | 4(2)     | 1(2)     |
| O(4)  | 11(3)    | 25(2)    | 20(2)    | -3(2)    | 5(2)     | 5(2)     |
| O(5)  | 13(3)    | 26(2)    | 26(2)    | 3(2)     | 12(2)    | 2(2)     |
| O(6)  | 17(3)    | 23(2)    | 17(2)    | 2(2)     | 9(2)     | 2(2)     |
| O(7)  | 16(3)    | 20(2)    | 23(2)    | -2(2)    | 12(2)    | -4(2)    |
| O(8)  | 18(3)    | 18(2)    | 16(2)    | -3(2)    | 6(2)     | 0(2)     |
| C(1)  | 27(5)    | 19(3)    | 39(4)    | 3(3)     | 10(4)    | 2(3)     |
| C(2)  | 16(4)    | 14(3)    | 22(3)    | -3(2)    | 7(3)     | -1(3)    |
| C(3)  | 18(4)    | 16(3)    | 29(3)    | -1(2)    | 10(3)    | -5(3)    |
| C(4)  | 12(4)    | 25(3)    | 18(3)    | -10(2)   | 3(3)     | 0(3)     |
| C(5)  | 21(5)    | 19(3)    | 24(3)    | -3(2)    | 4(3)     | -1(3)    |
| C(6)  | 35(6)    | 33(4)    | 39(3)    | 9(3)     | 9(4)     | 0(3)     |
| C(7)  | 44(6)    | 43(4)    | 42(4)    | 10(3)    | -3(5)    | 3(4)     |
| C(8)  | 21(6)    | 51(5)    | 58(5)    | 3(4)     | 0(5)     | 10(4)    |
| C(9)  | 31(6)    | 39(4)    | 58(4)    | -10(3)   | 5(4)     | 4(3)     |
| C(10) | 20(5)    | 29(3)    | 35(3)    | -1(3)    | 3(4)     | -2(3)    |
| C(11) | 36(6)    | 27(4)    | 37(4)    | -16(3)   | 4(4)     | -3(4)    |

|       |       |       |       |       |       |       |
|-------|-------|-------|-------|-------|-------|-------|
| C(12) | 9(5)  | 16(3) | 22(3) | 0(2)  | 2(3)  | -3(3) |
| C(13) | 13(4) | 11(3) | 18(3) | -4(2) | 2(3)  | 4(2)  |
| C(14) | 15(4) | 13(3) | 12(3) | 2(2)  | 7(3)  | 2(3)  |
| C(15) | 11(4) | 14(3) | 14(3) | 1(2)  | 8(3)  | 6(3)  |
| C(16) | 18(5) | 25(3) | 17(3) | 3(2)  | 2(3)  | 3(3)  |
| C(17) | 36(6) | 21(3) | 28(3) | 3(3)  | 12(4) | 0(3)  |
| C(18) | 20(5) | 23(3) | 28(3) | 1(3)  | 12(3) | 6(3)  |
| C(19) | 16(5) | 23(3) | 28(3) | 0(3)  | 4(3)  | 1(3)  |
| C(20) | 22(5) | 19(3) | 20(3) | -5(2) | 9(3)  | 3(3)  |
| C(21) | 27(6) | 38(4) | 31(4) | 3(3)  | 22(4) | -2(3) |
| C(22) | 20(3) | 20(2) | 22(2) | 0(2)  | 15(2) | -1(2) |
| C(23) | 20(3) | 20(2) | 22(2) | 0(2)  | 15(2) | -1(2) |
| C(24) | 11(4) | 10(3) | 19(3) | -1(2) | 11(3) | -2(2) |
| C(25) | 17(4) | 14(3) | 19(3) | 2(2)  | 9(3)  | 2(3)  |
| C(26) | 26(5) | 20(3) | 17(3) | 3(2)  | 6(3)  | 5(3)  |
| C(27) | 21(5) | 28(3) | 22(3) | 0(3)  | 1(3)  | 3(3)  |
| C(28) | 31(5) | 23(3) | 37(3) | 3(3)  | 4(3)  | 3(3)  |
| C(29) | 26(5) | 21(4) | 40(3) | 0(3)  | 8(4)  | 3(3)  |
| C(30) | 22(4) | 21(3) | 22(3) | 0(2)  | 10(3) | 4(3)  |
| C(31) | 26(6) | 28(4) | 54(4) | -7(3) | 16(4) | 2(3)  |
| C(32) | 18(4) | 27(3) | 25(3) | -5(3) | 10(3) | -1(4) |
| C(33) | 30(5) | 17(3) | 31(3) | -1(2) | 11(3) | -4(3) |
| C(34) | 11(4) | 24(3) | 13(2) | 5(2)  | 2(3)  | 5(3)  |
| C(35) | 23(5) | 19(3) | 10(3) | 4(2)  | -1(3) | 6(3)  |
| C(36) | 17(4) | 12(3) | 21(3) | -1(2) | 5(3)  | 3(3)  |
| C(37) | 23(5) | 29(3) | 24(3) | -5(3) | 11(3) | 5(3)  |
| C(38) | 30(5) | 26(3) | 34(3) | -1(3) | 23(3) | 9(3)  |
| C(39) | 18(4) | 27(3) | 21(3) | 1(3)  | 3(3)  | -4(3) |
| C(40) | 18(5) | 17(3) | 20(3) | 0(2)  | 14(3) | 1(3)  |
| N(1)  | 56(3) | 32(2) | 67(2) | 4(1)  | 29(2) | -2(2) |
| C(41) | 56(3) | 32(2) | 67(2) | 4(1)  | 29(2) | -2(2) |
| C(42) | 56(3) | 32(2) | 67(2) | 4(1)  | 29(2) | -2(2) |
| C(43) | 56(3) | 32(2) | 67(2) | 4(1)  | 29(2) | -2(2) |
| C(44) | 56(3) | 32(2) | 67(2) | 4(1)  | 29(2) | -2(2) |
| C(45) | 56(3) | 32(2) | 67(2) | 4(1)  | 29(2) | -2(2) |

---

**Table S5.** Hydrogen coordinates ( $\times 10^4$ ) and isotropic displacement parameters ( $\text{\AA}^2 \times 10^{-3}$ ) for mo\_IALVB88\_0m\_aa.

|       | x     | y    | z    | U(eq) |
|-------|-------|------|------|-------|
| H(3)  | 8373  | 5468 | 5104 | 24    |
| H(6)  | 9757  | 5788 | 6210 | 43    |
| H(7)  | 11697 | 5665 | 7143 | 56    |
| H(8)  | 13553 | 5844 | 6868 | 55    |
| H(9)  | 13594 | 6197 | 5699 | 53    |
| H(10) | 11657 | 6339 | 4770 | 34    |
| H(13) | 7945  | 5149 | 1589 | 18    |
| H(16) | 9829  | 4932 | 1467 | 25    |
| H(17) | 11754 | 4529 | 1560 | 34    |
| H(18) | 13478 | 4660 | 2638 | 27    |
| H(19) | 13093 | 5150 | 3673 | 27    |
| H(20) | 11147 | 5564 | 3589 | 24    |
| H(23) | 5834  | 7483 | 676  | 23    |
| H(26) | 3814  | 7447 | 392  | 25    |
| H(27) | 1741  | 7792 | 96   | 30    |
| H(28) | 1011  | 8297 | 976  | 38    |
| H(29) | 2371  | 8472 | 2171 | 36    |
| H(30) | 4392  | 8073 | 2503 | 25    |
| H(33) | 9136  | 8863 | 4097 | 31    |
| H(36) | 8206  | 9258 | 4858 | 20    |
| H(37) | 6840  | 9760 | 5403 | 29    |
| H(38) | 4810  | 9390 | 5250 | 33    |
| H(39) | 4078  | 8548 | 4465 | 27    |
| H(40) | 5425  | 8037 | 3942 | 20    |
| H(1A) | 4649  | 6672 | 3517 | 60    |
| H(41) | 4736  | 6305 | 2403 | 60    |
| H(42) | 2999  | 6278 | 1455 | 60    |
| H(43) | 1184  | 6579 | 1564 | 60    |
| H(44) | 979   | 6985 | 2549 | 60    |
| H(45) | 2576  | 7029 | 3689 | 60    |
